# Supplementary material for: Pattern Analysis of Organellar Maps for Interpretation of Proteomic Data
Source: MDPI journal article supplement (doi:10.3390/proteomes10020018), 2022-05-23
Supplement: s1 [file s1]

| Row Number | Accession | Description                                   | LOPIT Assignments |             |             |         |          |          |
|------------|-----------|-----------------------------------------------|-------------------|-------------|-------------|---------|----------|----------|
|            |           |                                               | assignment        | tSNE        | tSNE        | inElute | inWash01 | inWash02 |
|            |           |                                               |                   | Dimension.1 | Dimension.2 |         |          |          |
| 1          | P10412    | Histone H1.4                                  | NUCLEUS-CHROMATIN | -22.23      | -12.53      | TRUE    | TRUE     | TRUE     |
| 2          | P16403    | Histone H1.2                                  | NUCLEUS-CHROMATIN | -22.26      | -12.63      | FALSE   | TRUE     | TRUE     |
| 3          | P62861    | 40S ribosomal protein S30                     | RIBOSOME 40S      | 12.28       | -23.48      | TRUE    | TRUE     | TRUE     |
| 4          | P08238    | Heat shock protein HSP 90-beta                | CYTOSOL           | 20.67       | 22.31       | TRUE    | TRUE     | TRUE     |
| 5          | Q9NX58    | Cell growth-regulating nucleolar protein      | NUCLEUS           | 2.41        | -28.07      | TRUE    | TRUE     | TRUE     |
| 6          | Q13428    | Treacle protein                               | NUCLEUS           | -21.21      | -30.08      | TRUE    | TRUE     | TRUE     |
| 7          | P68104    | Elongation factor 1-alpha 1                   | unknown           | -4.40       | -10.29      | TRUE    | TRUE     | TRUE     |
| 8          | P62979    | Ubiquitin-40S ribosomal protein S27           | unknown           | 17.51       | -18.28      | TRUE    | TRUE     | TRUE     |
| 9          | P07305    | Histone H1.0                                  | NUCLEUS-CHROMATIN | -22.39      | -12.90      | TRUE    | TRUE     | TRUE     |
| 10         | P13639    | Elongation factor 2                           | unknown           | 14.67       | -21.12      | TRUE    | TRUE     | TRUE     |
| 11         | P14618    | Pyruvate kinase PKM                           | unknown           | 10.11       | -2.34       | TRUE    | TRUE     | TRUE     |
| 12         | P62750    | 60S ribosomal protein L23a                    | RIBOSOME 60S      | 16.20       | -22.26      | TRUE    | TRUE     | TRUE     |
| 13         | P07437    | Tubulin beta chain                            | unknown           | 17.51       | 12.63       | TRUE    | TRUE     | TRUE     |
| 14         | P00338    | L-lactate dehydrogenase A chain               | unknown           | 17.59       | 7.15        | TRUE    | TRUE     | TRUE     |
| 15         | P07900    | Heat shock protein HSP 90-alpha               | unknown           | 23.54       | 23.08       | TRUE    | TRUE     | TRUE     |
| 16         | P04406    | Glyceraldehyde-3-phosphate dehydrogenase      | unknown           | 10.91       | -2.32       | FALSE   | TRUE     | TRUE     |
| 17         | P11142    | Heat shock cognate 71 kDa protein             | unknown           | 13.41       | 11.74       | TRUE    | TRUE     | TRUE     |
| 18         | P62805    | Histone H4                                    | NUCLEUS-CHROMATIN | -22.92      | -13.63      | TRUE    | TRUE     | TRUE     |
| 19         | P68371    | Tubulin beta-4B chain                         | CYTOSOL           | 20.99       | 18.38       | TRUE    | TRUE     | TRUE     |
| 20         | O00567    | Nucleolar protein 56                          | NUCLEUS           | -3.62       | -40.72      | TRUE    | TRUE     | TRUE     |
| 21         | P49327    | Fatty acid synthase                           | unknown           | 19.38       | 9.92        | TRUE    | TRUE     | TRUE     |
| 22         | P08670    | Vimentin                                      | NUCLEUS           | -26.11      | -26.79      | TRUE    | TRUE     | TRUE     |
| 23         | P31327    | Carbamoyl-phosphate synthase [amino acid]     | MITOCHONDRIA      | 36.41       | -8.41       | FALSE   | TRUE     | TRUE     |
| 24         | P05141    | ADP/ATP translocase 2                         | MITOCHONDRIA      | 32.33       | -13.30      | TRUE    | TRUE     | TRUE     |
| 25         | Q02878    | 60S ribosomal protein L6                      | RIBOSOME 60S      | 16.06       | -21.88      | TRUE    | TRUE     | TRUE     |
| 26         | Q562R1    | Beta-actin-like protein 2                     | unknown           | 3.89        | 8.32        | FALSE   | TRUE     | TRUE     |
| 27         | Q1ED39    | Lysine-rich nucleolar protein 1               | NUCLEUS           | 0.46        | -28.34      | TRUE    | TRUE     | TRUE     |
| 28         | P07195    | L-lactate dehydrogenase B chain               | CYTOSOL           | 22.23       | 21.65       | FALSE   | TRUE     | TRUE     |
| 29         | P07737    | Profilin-1                                    | CYTOSOL           | 22.56       | 22.08       | FALSE   | TRUE     | TRUE     |
| 30         | P62937    | Peptidyl-prolyl cis-trans isomerase [cytosol] | unknown           | 15.45       | 10.96       | TRUE    | TRUE     | TRUE     |
| 31         | P60842    | Eukaryotic initiation factor 4A-I             | unknown           | 13.49       | -1.19       | TRUE    | TRUE     | TRUE     |
| 32         | P18583    | Protein SON                                   | NUCLEUS           | -3.66       | -34.30      | TRUE    | TRUE     | TRUE     |
| 33         | P06733    | Alpha-enolase                                 | CYTOSOL           | 22.75       | 19.08       | FALSE   | TRUE     | TRUE     |
| 34         | P47914    | 60S ribosomal protein L29                     | RIBOSOME 60S      | 16.99       | -20.62      | TRUE    | TRUE     | TRUE     |

|    |        |                                          |                   |        |        |       |      |      |
|----|--------|------------------------------------------|-------------------|--------|--------|-------|------|------|
| 35 | P62241 | 40S ribosomal protein S8                 | RIBOSOME 40S      | 11.84  | -22.95 | TRUE  | TRUE | TRUE |
| 36 | P11021 | Endoplasmic reticulum chaperone ER       | ER                | -1.49  | 38.57  | TRUE  | TRUE | TRUE |
| 37 | P22626 | Heterogeneous nuclear ribonucleoprotein  | NUCLEUS           | -13.47 | -36.47 | TRUE  | TRUE | TRUE |
| 38 | P39023 | 60S ribosomal protein L3                 | RIBOSOME 60S      | 16.15  | -21.46 | TRUE  | TRUE | TRUE |
| 39 | P62424 | 60S ribosomal protein L7a                | RIBOSOME 60S      | 17.04  | -21.59 | TRUE  | TRUE | TRUE |
| 40 | Q06830 | Peroxiredoxin-1                          | NUCLEUS           | -2.16  | -12.94 | TRUE  | TRUE | TRUE |
| 41 | P11387 | DNA topoisomerase 1                      | NUCLEUS-CHROMATIN | -22.28 | -15.61 | FALSE | TRUE | TRUE |
| 42 | Q08211 | ATP-dependent RNA helicase A             | NUCLEUS           | -6.14  | -31.92 | TRUE  | TRUE | TRUE |
| 43 | P12235 | ADP/ATP translocase 1                    | unknown           | 29.48  | -15.75 | FALSE | TRUE | TRUE |
| 44 | P63244 | Receptor of activated protein C kinase   | RIBOSOME 40S      | 10.96  | -22.66 | FALSE | TRUE | TRUE |
| 45 | Q969Q0 | 60S ribosomal protein L36a-like          | RIBOSOME 60S      | 17.26  | -22.14 | TRUE  | TRUE | TRUE |
| 46 | P62826 | GTP-binding nuclear protein Ran          | unknown           | 23.38  | 12.48  | TRUE  | TRUE | TRUE |
| 47 | Q6P2Q9 | Pre-mRNA-processing-splicing factor      | NUCLEUS           | 1.57   | -37.78 | TRUE  | TRUE | TRUE |
| 48 | O60841 | Eukaryotic translation initiation factor | NUCLEUS           | -8.21  | -15.56 | TRUE  | TRUE | TRUE |
| 49 | Q9NR30 | Nucleolar RNA helicase 2                 | NUCLEUS           | -1.24  | -35.52 | TRUE  | TRUE | TRUE |
| 50 | Q9BRT6 | Protein LLP homolog                      | NUCLEUS           | 5.86   | -26.53 | TRUE  | TRUE | TRUE |
| 51 | Q9BUF5 | Tubulin beta-6 chain                     | unknown           | 15.81  | 9.71   | FALSE | TRUE | TRUE |
| 52 | P10809 | 60 kDa heat shock protein, mitochondria  | MITOCHONDRIA      | 36.01  | -6.60  | TRUE  | TRUE | TRUE |
| 53 | P23396 | 40S ribosomal protein S3                 | RIBOSOME 40S      | 11.14  | -22.60 | FALSE | TRUE | TRUE |
| 54 | P26641 | Elongation factor 1-gamma                | NUCLEUS           | -8.90  | -14.58 | FALSE | TRUE | TRUE |
| 55 | O14617 | AP-3 complex subunit delta-1             | unknown           | -13.11 | 3.47   | FALSE | TRUE | TRUE |
| 56 | P78527 | DNA-dependent protein kinase catalytic   | unknown           | -14.76 | -16.04 | TRUE  | TRUE | TRUE |
| 57 | Q00839 | Heterogeneous nuclear ribonucleoprotein  | NUCLEUS           | -6.74  | -31.74 | TRUE  | TRUE | TRUE |
| 58 | Q00839 | Heterogeneous nuclear ribonucleoprotein  | NUCLEUS           | -6.81  | -31.81 | TRUE  | TRUE | TRUE |
| 59 | P62753 | 40S ribosomal protein S6                 | RIBOSOME 40S      | 11.39  | -22.69 | FALSE | TRUE | TRUE |
| 60 | P21333 | Filamin-A                                | unknown           | -8.02  | -4.54  | TRUE  | TRUE | TRUE |
| 61 | Q14240 | Eukaryotic initiation factor 4A-II       | unknown           | 4.06   | 6.23   | FALSE | TRUE | TRUE |
| 62 | P62829 | 60S ribosomal protein L23                | RIBOSOME 60S      | 15.98  | -22.41 | TRUE  | TRUE | TRUE |
| 63 | Q07020 | 60S ribosomal protein L18                | RIBOSOME 60S      | 17.48  | -21.04 | FALSE | TRUE | TRUE |
| 64 | Q12931 | Heat shock protein 75 kDa, mitochondria  | MITOCHONDRIA      | 38.00  | -8.37  | FALSE | TRUE | TRUE |
| 65 | P07355 | Annexin A2                               | unknown           | -17.10 | 13.74  | TRUE  | TRUE | TRUE |
| 66 | Q09666 | Neuroblast differentiation-associated    | unknown           | -10.35 | 23.31  | TRUE  | TRUE | TRUE |
| 67 | P23526 | Adenosylhomocysteinase                   | CYTOSOL           | 22.32  | 22.66  | TRUE  | TRUE | TRUE |
| 68 | P30041 | Peroxiredoxin-6                          | unknown           | 24.55  | 24.23  | TRUE  | TRUE | TRUE |
| 69 | O60832 | H/ACA ribonucleoprotein complex subunit  | NUCLEUS           | -4.14  | -39.00 | TRUE  | TRUE | TRUE |
| 70 | P06748 | Nucleophosmin                            | unknown           | 6.89   | -13.95 | TRUE  | TRUE | TRUE |
| 71 | P23284 | Peptidyl-prolyl cis-trans isomerase I    | ER                | 1.79   | 36.67  | TRUE  | TRUE | TRUE |
| 72 | P62917 | 60S ribosomal protein L8                 | RIBOSOME 60S      | 17.02  | -21.27 | TRUE  | TRUE | TRUE |

|     |        |                                      |                   |        |        |       |      |      |
|-----|--------|--------------------------------------|-------------------|--------|--------|-------|------|------|
| 73  | P62280 | 40S ribosomal protein S11            | RIBOSOME 40S      | 11.41  | -22.61 | FALSE | TRUE | TRUE |
| 74  | Q92522 | Histone H1x                          | NUCLEUS-CHROMATIN | -14.88 | -19.84 | TRUE  | TRUE | TRUE |
| 75  | P83731 | 60S ribosomal protein L24            | RIBOSOME 60S      | 17.38  | -21.67 | TRUE  | TRUE | TRUE |
| 76  | P62701 | 40S ribosomal protein S4, X isoform  | RIBOSOME 40S      | 11.23  | -22.87 | FALSE | TRUE | TRUE |
| 77  | P18124 | 60S ribosomal protein L7             | RIBOSOME 60S      | 16.01  | -21.95 | FALSE | TRUE | TRUE |
| 78  | Q8NE71 | ATP-binding cassette sub-family F r  | unknown           | -3.94  | -10.81 | TRUE  | TRUE | TRUE |
| 79  | P15880 | 40S ribosomal protein S2             | RIBOSOME 40S      | 11.08  | -22.58 | TRUE  | TRUE | TRUE |
| 80  | O76021 | Ribosomal L1 domain-containing pr    | NUCLEUS           | 0.69   | -38.72 | TRUE  | TRUE | TRUE |
| 81  | P11498 | Pyruvate carboxylase, mitochondria   | MITOCHONDRIA      | 36.81  | -6.11  | TRUE  | TRUE | TRUE |
| 82  | O00571 | ATP-dependent RNA helicase DDX3      | unknown           | 3.93   | -26.10 | TRUE  | TRUE | TRUE |
| 83  | P62263 | 40S ribosomal protein S14            | RIBOSOME 40S      | 11.79  | -22.91 | TRUE  | TRUE | TRUE |
| 84  | P36578 | 60S ribosomal protein L4             | RIBOSOME 60S      | 15.64  | -21.82 | TRUE  | TRUE | TRUE |
| 85  | P61313 | 60S ribosomal protein L15            | RIBOSOME 60S      | 16.41  | -21.24 | FALSE | TRUE | TRUE |
| 86  | Q02543 | 60S ribosomal protein L18a           | RIBOSOME 60S      | 16.65  | -21.31 | FALSE | TRUE | TRUE |
| 87  | P46777 | 60S ribosomal protein L5             | RIBOSOME 60S      | 16.70  | -21.41 | FALSE | TRUE | TRUE |
| 88  | P17844 | Probable ATP-dependent RNA helic     | NUCLEUS           | 1.86   | -32.46 | TRUE  | TRUE | TRUE |
| 89  | P11388 | DNA topoisomerase 2-alpha            | NUCLEUS-CHROMATIN | -21.59 | -13.79 | TRUE  | TRUE | TRUE |
| 90  | P46776 | 60S ribosomal protein L27a           | RIBOSOME 60S      | 15.37  | -21.93 | TRUE  | TRUE | TRUE |
| 91  | Q00610 | Clathrin heavy chain 1               | unknown           | -10.03 | 13.72  | FALSE | TRUE | TRUE |
| 92  | P06576 | ATP synthase subunit beta, mitoch    | MITOCHONDRIA      | 35.78  | -7.03  | FALSE | TRUE | TRUE |
| 93  | P14625 | Endoplasmic                          | ER                | -1.05  | 39.01  | FALSE | TRUE | TRUE |
| 94  | Q9BVP2 | Guanine nucleotide-binding protein   | NUCLEUS           | 2.10   | -35.18 | TRUE  | TRUE | TRUE |
| 95  | Q14204 | Cytoplasmic dynein 1 heavy chain 1   | unknown           | -11.35 | -7.41  | FALSE | TRUE | TRUE |
| 96  | Q7KZF4 | Staphylococcal nuclease domain-co    | RIBOSOME 60S      | 16.90  | -23.47 | FALSE | TRUE | TRUE |
| 97  | P61353 | 60S ribosomal protein L27            | RIBOSOME 60S      | 17.62  | -22.17 | FALSE | TRUE | TRUE |
| 98  | P38646 | Stress-70 protein, mitochondrial     | MITOCHONDRIA      | 37.28  | -4.73  | FALSE | TRUE | TRUE |
| 99  | Q9UQ80 | Proliferation-associated protein 2G4 | unknown           | 11.54  | -20.80 | TRUE  | TRUE | TRUE |
| 100 | P17987 | T-complex protein 1 subunit alpha    | unknown           | 15.73  | 9.83   | FALSE | TRUE | TRUE |
| 101 | P00558 | Phosphoglycerate kinase 1            | CYTOSOL           | 22.88  | 22.95  | TRUE  | TRUE | TRUE |
| 102 | P35579 | Myosin-9                             | unknown           | 24.35  | -5.17  | TRUE  | TRUE | TRUE |
| 103 | P60174 | Triosephosphate isomerase            | CYTOSOL           | 21.56  | 22.84  | FALSE | TRUE | TRUE |
| 104 | Q14697 | Neutral alpha-glucosidase AB         | unknown           | 0.93   | 40.29  | FALSE | TRUE | TRUE |
| 105 | P25705 | ATP synthase subunit alpha, mitoch   | MITOCHONDRIA      | 35.86  | -8.72  | FALSE | TRUE | TRUE |
| 106 | P19338 | Nucleolin                            | unknown           | 23.34  | 12.20  | TRUE  | TRUE | TRUE |
| 107 | P55060 | Exportin-2                           | unknown           | 27.66  | 22.33  | TRUE  | TRUE | TRUE |
| 108 | P14866 | Heterogeneous nuclear ribonucleop    | NUCLEUS           | -13.51 | -36.53 | TRUE  | TRUE | TRUE |
| 109 | P62847 | 40S ribosomal protein S24            | RIBOSOME 40S      | 11.04  | -22.97 | FALSE | TRUE | TRUE |
| 110 | P11940 | Polyadenylate-binding protein 1      | unknown           | 3.93   | -22.17 | FALSE | TRUE | TRUE |

|     |        |                                             |                   |        |        |       |      |      |
|-----|--------|---------------------------------------------|-------------------|--------|--------|-------|------|------|
| 111 | P22392 | Nucleoside diphosphate kinase B             | unknown           | 19.69  | 9.81   | FALSE | TRUE | TRUE |
| 112 | P63241 | Eukaryotic translation initiation factor 4E | unknown           | 2.34   | -13.49 | TRUE  | TRUE | TRUE |
| 113 | P30050 | 60S ribosomal protein L12                   | RIBOSOME 60S      | 16.23  | -21.51 | FALSE | TRUE | TRUE |
| 114 | P38919 | Eukaryotic initiation factor 4A-III         | NUCLEUS           | -3.27  | -40.69 | TRUE  | TRUE | TRUE |
| 115 | P12956 | X-ray repair cross-complementing protein 1  | NUCLEUS           | -4.81  | -16.05 | FALSE | TRUE | TRUE |
| 116 | P49411 | Elongation factor Tu, mitochondrial         | MITOCHONDRIA      | 39.58  | -7.73  | FALSE | TRUE | TRUE |
| 117 | Q9H0A0 | RNA cytidine acetyltransferase              | NUCLEUS           | -1.77  | -36.99 | TRUE  | TRUE | TRUE |
| 118 | Q15365 | Poly(rC)-binding protein 1                  | unknown           | 13.27  | 1.63   | TRUE  | TRUE | TRUE |
| 119 | P26639 | Threonine--tRNA ligase, cytoplasmic         | unknown           | 16.42  | 5.10   | TRUE  | TRUE | TRUE |
| 120 | P31943 | Heterogeneous nuclear ribonucleoprotein A1  | NUCLEUS           | -19.22 | -32.48 | TRUE  | TRUE | TRUE |
| 121 | P63104 | 14-3-3 protein zeta/delta                   | unknown           | 12.40  | 16.27  | FALSE | TRUE | TRUE |
| 122 | P42677 | 40S ribosomal protein S27                   | RIBOSOME 40S      | 10.56  | -23.47 | TRUE  | TRUE | TRUE |
| 123 | P46781 | 40S ribosomal protein S9                    | RIBOSOME 40S      | 11.82  | -22.76 | FALSE | TRUE | TRUE |
| 124 | P41091 | Eukaryotic translation initiation factor 4G | NUCLEUS           | -3.17  | -13.89 | TRUE  | TRUE | TRUE |
| 125 | P02786 | Transferrin receptor protein 1              | unknown           | -36.28 | 15.05  | TRUE  | TRUE | TRUE |
| 126 | P29401 | Transketolase                               | unknown           | 8.23   | -4.49  | TRUE  | TRUE | TRUE |
| 127 | P51991 | Heterogeneous nuclear ribonucleoprotein A2  | NUCLEUS           | -13.12 | -36.41 | TRUE  | TRUE | TRUE |
| 128 | Q15149 | Plectin                                     | NUCLEUS           | -11.97 | -18.97 | TRUE  | TRUE | TRUE |
| 129 | Q15149 | Plectin                                     | unknown           | 2.19   | -26.46 | TRUE  | TRUE | TRUE |
| 130 | Q9Y2X3 | Nucleolar protein 58                        | NUCLEUS           | -3.37  | -40.99 | FALSE | TRUE | TRUE |
| 131 | P15121 | Aldose reductase                            | CYTOSOL           | 20.89  | 20.79  | FALSE | TRUE | TRUE |
| 132 | Q00325 | Phosphate carrier protein, mitochondrial    | MITOCHONDRIA      | 36.91  | -12.21 | FALSE | TRUE | TRUE |
| 133 | P62888 | 60S ribosomal protein L30                   | RIBOSOME 60S      | 16.79  | -21.50 | FALSE | TRUE | TRUE |
| 134 | Q99623 | Prohibitin-2                                | MITOCHONDRIA      | 30.33  | -6.19  | FALSE | TRUE | TRUE |
| 135 | P09874 | Poly [ADP-ribose] polymerase 1              | NUCLEUS-CHROMATIN | -22.18 | -15.66 | FALSE | TRUE | TRUE |
| 136 | P50991 | T-complex protein 1 subunit delta           | unknown           | 10.92  | -1.40  | FALSE | TRUE | TRUE |
| 137 | P46778 | 60S ribosomal protein L21                   | RIBOSOME 60S      | 16.47  | -22.22 | TRUE  | TRUE | TRUE |
| 138 | P31946 | 14-3-3 protein beta/alpha                   | unknown           | 12.67  | 16.10  | FALSE | TRUE | TRUE |
| 139 | P84103 | Serine/arginine-rich splicing factor 3      | NUCLEUS           | -5.54  | -31.21 | FALSE | TRUE | TRUE |
| 140 | P61254 | 60S ribosomal protein L26                   | RIBOSOME 60S      | 16.60  | -22.74 | TRUE  | TRUE | TRUE |
| 141 | P50395 | Rab GDP dissociation inhibitor beta         | unknown           | 14.71  | 23.14  | FALSE | TRUE | TRUE |
| 142 | P26373 | 60S ribosomal protein L13                   | RIBOSOME 60S      | 17.39  | -21.61 | TRUE  | TRUE | TRUE |
| 143 | Q15029 | 116 kDa U5 small nuclear ribonucleoprotein  | NUCLEUS           | 1.76   | -37.42 | FALSE | TRUE | TRUE |
| 144 | Q99832 | T-complex protein 1 subunit eta             | unknown           | 10.62  | -1.78  | FALSE | TRUE | TRUE |
| 145 | P62258 | 14-3-3 protein epsilon                      | unknown           | 11.54  | 14.69  | FALSE | TRUE | TRUE |
| 146 | Q01813 | ATP-dependent 6-phosphofructokinase         | unknown           | 8.51   | -3.07  | FALSE | TRUE | TRUE |
| 147 | P26038 | Moesin                                      | unknown           | -13.75 | 13.59  | TRUE  | TRUE | TRUE |
| 148 | O75643 | U5 small nuclear ribonucleoprotein          | NUCLEUS           | 1.39   | -37.63 | TRUE  | TRUE | TRUE |

|     |        |                                      |              |        |        |       |      |      |
|-----|--------|--------------------------------------|--------------|--------|--------|-------|------|------|
| 149 | P50990 | T-complex protein 1 subunit theta    | CYTOSOL      | 16.88  | 17.72  | TRUE  | TRUE | TRUE |
| 150 | P02545 | Prelamin-A/C                         | unknown      | 23.57  | -12.75 | TRUE  | TRUE | TRUE |
| 151 | P48643 | T-complex protein 1 subunit epsilon  | unknown      | 16.64  | 17.32  | TRUE  | TRUE | TRUE |
| 152 | P04075 | Fructose-bisphosphate aldolase A     | unknown      | 8.94   | 4.39   | FALSE | TRUE | TRUE |
| 153 | P61247 | 40S ribosomal protein S3a            | RIBOSOME 40S | 11.05  | -22.91 | TRUE  | TRUE | TRUE |
| 154 | P07814 | Bifunctional glutamate/proline--tRNA | unknown      | 5.75   | -3.24  | TRUE  | TRUE | TRUE |
| 155 | P49368 | T-complex protein 1 subunit gamma    | unknown      | 10.47  | 1.37   | FALSE | TRUE | TRUE |
| 156 | Q15233 | Non-POU domain-containing octamer    | NUCLEUS      | 2.04   | -33.31 | TRUE  | TRUE | TRUE |
| 157 | P15311 | Ezrin                                | unknown      | -13.75 | 13.55  | TRUE  | TRUE | TRUE |
| 158 | P62854 | 40S ribosomal protein S26            | RIBOSOME 40S | 12.72  | -19.11 | TRUE  | TRUE | TRUE |
| 159 | P46087 | Probable 28S rRNA (cytosine(4447)    | NUCLEUS      | -0.11  | -35.62 | TRUE  | TRUE | TRUE |
| 160 | P27348 | 14-3-3 protein theta                 | unknown      | 13.05  | 15.97  | TRUE  | TRUE | TRUE |
| 161 | P22087 | rRNA 2'-O-methyltransferase fibrill  | NUCLEUS      | -0.97  | -38.80 | FALSE | TRUE | TRUE |
| 162 | P62081 | 40S ribosomal protein S7             | RIBOSOME 40S | 11.33  | -23.11 | FALSE | TRUE | TRUE |
| 163 | P62249 | 40S ribosomal protein S16            | RIBOSOME 40S | 11.30  | -22.62 | FALSE | TRUE | TRUE |
| 164 | Q99714 | 3-hydroxyacyl-CoA dehydrogenase      | MITOCHONDRIA | 37.05  | -4.17  | FALSE | TRUE | TRUE |
| 165 | P33993 | DNA replication licensing factor MC  | unknown      | -15.45 | -31.51 | FALSE | TRUE | TRUE |
| 166 | P18669 | Phosphoglycerate mutase 1            | CYTOSOL      | 23.14  | 19.88  | FALSE | TRUE | TRUE |
| 167 | Q86UE4 | Protein LYRIC                        | unknown      | 5.07   | 38.63  | TRUE  | TRUE | TRUE |
| 168 | P20908 | Collagen alpha-1(V) chain            | unknown      | -14.54 | 20.25  | FALSE | TRUE | TRUE |
| 169 | P35268 | 60S ribosomal protein L22            | RIBOSOME 60S | 17.38  | -20.02 | TRUE  | TRUE | TRUE |
| 170 | P07910 | Heterogeneous nuclear ribonucleop    | NUCLEUS      | -13.13 | -36.32 | TRUE  | TRUE | TRUE |
| 171 | Q9NZM1 | Myoferlin                            | unknown      | -33.67 | 10.04  | TRUE  | TRUE | TRUE |
| 172 | Q14684 | Ribosomal RNA processing protein 1   | NUCLEUS      | -0.75  | -35.25 | TRUE  | TRUE | TRUE |
| 173 | P21796 | Voltage-dependent anion-selective    | unknown      | 28.29  | -6.28  | FALSE | TRUE | TRUE |
| 174 | P60866 | 40S ribosomal protein S20            | RIBOSOME 40S | 11.44  | -22.84 | FALSE | TRUE | TRUE |
| 175 | P34932 | Heat shock 70 kDa protein 4          | CYTOSOL      | 23.36  | 23.40  | FALSE | TRUE | TRUE |
| 176 | P05387 | 60S acidic ribosomal protein P2      | RIBOSOME 60S | 15.95  | -21.03 | FALSE | TRUE | TRUE |
| 177 | P23528 | Cofilin-1                            | unknown      | 3.47   | 9.47   | TRUE  | TRUE | TRUE |
| 178 | P62913 | 60S ribosomal protein L11            | RIBOSOME 60S | 16.02  | -21.63 | FALSE | TRUE | TRUE |
| 179 | P61604 | 10 kDa heat shock protein, mitoch    | MITOCHONDRIA | 32.44  | -6.91  | FALSE | TRUE | TRUE |
| 180 | Q9UQ35 | Serine/arginine repetitive matrix pr | NUCLEUS      | -10.41 | -29.80 | FALSE | TRUE | TRUE |
| 181 | Q7L014 | Probable ATP-dependent RNA helic     | NUCLEUS      | 4.29   | -31.23 | TRUE  | TRUE | TRUE |
| 182 | P32119 | Peroxiredoxin-2                      | unknown      | 10.36  | 1.08   | TRUE  | TRUE | TRUE |
| 183 | Q99873 | Protein arginine N-methyltransfera   | unknown      | 26.35  | 21.97  | FALSE | TRUE | TRUE |
| 184 | P40429 | 60S ribosomal protein L13a           | RIBOSOME 60S | 16.81  | -21.55 | FALSE | TRUE | TRUE |
| 185 | Q9HB71 | Calcyclin-binding protein            | unknown      | 9.40   | -0.92  | FALSE | TRUE | TRUE |
| 186 | P62244 | 40S ribosomal protein S15a           | RIBOSOME 40S | 11.50  | -22.87 | FALSE | TRUE | TRUE |

|     |        |                                        |              |        |        |       |      |       |
|-----|--------|----------------------------------------|--------------|--------|--------|-------|------|-------|
| 187 | P33992 | DNA replication licensing factor MC    | NUCLEUS      | -3.74  | -16.51 | FALSE | TRUE | TRUE  |
| 188 | P62906 | 60S ribosomal protein L10a             | RIBOSOME 60S | 16.14  | -21.65 | FALSE | TRUE | TRUE  |
| 189 | P32969 | 60S ribosomal protein L9               | RIBOSOME 60S | 16.79  | -21.46 | FALSE | TRUE | TRUE  |
| 190 | P40227 | T-complex protein 1 subunit zeta       | unknown      | 9.47   | -0.06  | TRUE  | TRUE | TRUE  |
| 191 | Q16629 | Serine/arginine-rich splicing factor 7 | NUCLEUS      | 3.97   | -26.74 | FALSE | TRUE | TRUE  |
| 192 | P38159 | RNA-binding motif protein, X chrom     | NUCLEUS      | 1.59   | -35.43 | FALSE | TRUE | TRUE  |
| 193 | P55072 | Transitional endoplasmic reticulum     | unknown      | 2.96   | 11.63  | TRUE  | TRUE | TRUE  |
| 194 | P61981 | 14-3-3 protein gamma                   | unknown      | 10.14  | 13.95  | FALSE | TRUE | TRUE  |
| 195 | P24534 | Elongation factor 1-beta               | NUCLEUS      | 4.01   | -6.42  | TRUE  | TRUE | TRUE  |
| 196 | O43707 | Alpha-actinin-4                        | unknown      | 4.03   | 9.41   | FALSE | TRUE | TRUE  |
| 197 | P55795 | Heterogeneous nuclear ribonucleop      | NUCLEUS      | -19.30 | -32.48 | FALSE | TRUE | TRUE  |
| 198 | P04843 | Dolichyl-diphosphooligosaccharide-     | ER           | 2.60   | 34.84  | FALSE | TRUE | TRUE  |
| 199 | P37802 | Transgelin-2                           | unknown      | 11.19  | 13.24  | TRUE  | TRUE | TRUE  |
| 200 | Q07021 | Complement component 1 Q subco         | MITOCHONDRIA | 35.06  | -7.62  | FALSE | TRUE | TRUE  |
| 201 | P62266 | 40S ribosomal protein S23              | RIBOSOME 40S | 11.46  | -22.92 | FALSE | TRUE | TRUE  |
| 202 | P27797 | Calreticulin                           | ER           | -0.75  | 39.15  | FALSE | TRUE | TRUE  |
| 203 | P62820 | Ras-related protein Rab-1A             | PM           | -28.73 | 13.58  | FALSE | TRUE | TRUE  |
| 204 | O75400 | Pre-mRNA-processing factor 40 hor      | NUCLEUS      | 3.71   | -35.99 | TRUE  | TRUE | TRUE  |
| 205 | Q07955 | Serine/arginine-rich splicing factor 1 | unknown      | -16.09 | -31.46 | FALSE | TRUE | TRUE  |
| 206 | Q9Y383 | Putative RNA-binding protein Luc7-l    | unknown      | 7.13   | -24.56 | TRUE  | TRUE | TRUE  |
| 207 | Q13310 | Polyadenylate-binding protein 4        | unknown      | 3.86   | -22.06 | FALSE | TRUE | TRUE  |
| 208 | P05023 | Sodium/potassium-transporting AT       | PM           | -22.77 | 16.68  | TRUE  | TRUE | TRUE  |
| 209 | Q13838 | Spliceosome RNA helicase DDX39B        | NUCLEUS      | -2.89  | -41.61 | FALSE | TRUE | TRUE  |
| 210 | P08865 | 40S ribosomal protein SA               | RIBOSOME 40S | 11.69  | -22.19 | FALSE | TRUE | TRUE  |
| 211 | P49207 | 60S ribosomal protein L34              | RIBOSOME 60S | 17.93  | -21.15 | FALSE | TRUE | TRUE  |
| 212 | P25398 | 40S ribosomal protein S12              | RIBOSOME 40S | 11.45  | -22.22 | FALSE | TRUE | TRUE  |
| 213 | Q9H0U4 | Ras-related protein Rab-1B             | unknown      | -18.21 | 20.49  | FALSE | TRUE | FALSE |
| 214 | P62899 | 60S ribosomal protein L31              | RIBOSOME 60S | 17.48  | -22.29 | FALSE | TRUE | TRUE  |
| 215 | O00148 | ATP-dependent RNA helicase DDX3        | NUCLEUS      | -11.40 | -25.94 | FALSE | TRUE | TRUE  |
| 216 | P50914 | 60S ribosomal protein L14              | RIBOSOME 60S | 16.60  | -21.49 | TRUE  | TRUE | TRUE  |
| 217 | P25205 | DNA replication licensing factor MC    | NUCLEUS      | -14.93 | -28.96 | FALSE | TRUE | TRUE  |
| 218 | Q9BU76 | Multiple myeloma tumor-associate       | unknown      | 2.23   | -26.61 | TRUE  | TRUE | TRUE  |
| 219 | P05388 | 60S acidic ribosomal protein P0        | RIBOSOME 60S | 17.12  | -21.36 | FALSE | TRUE | TRUE  |
| 220 | P13010 | X-ray repair cross-complementing p     | NUCLEUS      | -4.85  | -16.06 | TRUE  | TRUE | TRUE  |
| 221 | P27635 | 60S ribosomal protein L10              | RIBOSOME 60S | 16.94  | -21.08 | FALSE | TRUE | TRUE  |
| 222 | P27824 | Calnexin                               | ER           | -6.05  | 31.91  | TRUE  | TRUE | TRUE  |
| 223 | Q9UG63 | ATP-binding cassette sub-family F r    | unknown      | 10.10  | -20.95 | FALSE | TRUE | TRUE  |
| 224 | P16615 | Sarcoplasmic/endoplasmic reticul       | ER           | -6.24  | 33.40  | FALSE | TRUE | TRUE  |

|     |        |                                                     |                   |        |        |       |       |      |
|-----|--------|-----------------------------------------------------|-------------------|--------|--------|-------|-------|------|
| 225 | P78371 | T-complex protein 1 subunit beta                    | unknown           | 16.02  | 10.50  | FALSE | TRUE  | TRUE |
| 226 | P40939 | Trifunctional enzyme subunit alpha                  | MITOCHONDRIA      | 41.70  | -6.16  | FALSE | TRUE  | TRUE |
| 227 | P35241 | Radixin                                             | unknown           | -13.18 | 13.59  | TRUE  | TRUE  | TRUE |
| 228 | Q14103 | Heterogeneous nuclear ribonucleoprotein A1          | NUCLEUS           | -19.81 | -32.67 | TRUE  | TRUE  | TRUE |
| 229 | P51149 | Ras-related protein Rab-7a                          | unknown           | -25.19 | 18.08  | FALSE | TRUE  | TRUE |
| 230 | Q02539 | Histone H1.1                                        | NUCLEUS-CHROMATIN | -22.35 | -12.47 | FALSE | FALSE | TRUE |
| 231 | P13797 | Plastin-3                                           | unknown           | 9.51   | 13.21  | TRUE  | TRUE  | TRUE |
| 232 | P53621 | Coatomer subunit alpha                              | unknown           | 6.45   | 3.59   | FALSE | TRUE  | TRUE |
| 233 | P06744 | Glucose-6-phosphate isomerase                       | unknown           | 13.72  | -2.01  | FALSE | TRUE  | TRUE |
| 234 | P27708 | CAD protein                                         | unknown           | 9.07   | -13.07 | FALSE | TRUE  | TRUE |
| 235 | P61026 | Ras-related protein Rab-10                          | unknown           | -11.92 | 20.30  | FALSE | TRUE  | TRUE |
| 236 | P31947 | 14-3-3 protein sigma                                | unknown           | 21.94  | 25.58  | FALSE | TRUE  | TRUE |
| 237 | P61106 | Ras-related protein Rab-14                          | unknown           | -33.55 | 13.60  | FALSE | TRUE  | TRUE |
| 238 | O14979 | Heterogeneous nuclear ribonucleoprotein A1          | NUCLEUS           | -20.50 | -33.22 | FALSE | TRUE  | TRUE |
| 239 | P62910 | 60S ribosomal protein L32                           | RIBOSOME 60S      | 15.15  | -22.12 | FALSE | TRUE  | TRUE |
| 240 | P18621 | 60S ribosomal protein L17                           | RIBOSOME 60S      | 16.16  | -21.89 | TRUE  | TRUE  | TRUE |
| 241 | Q04917 | 14-3-3 protein eta                                  | unknown           | 11.55  | 14.00  | FALSE | TRUE  | TRUE |
| 242 | P11413 | Glucose-6-phosphate 1-dehydrogenase                 | unknown           | 15.89  | 11.14  | TRUE  | TRUE  | TRUE |
| 243 | Q15286 | Ras-related protein Rab-35                          | PM                | -25.26 | 16.30  | FALSE | TRUE  | TRUE |
| 244 | P53999 | Activated RNA polymerase II transcription factor II | unknown           | 17.13  | 3.05   | TRUE  | TRUE  | TRUE |
| 245 | O43175 | D-3-phosphoglycerate dehydrogenase                  | unknown           | 12.51  | 10.15  | FALSE | TRUE  | TRUE |
| 246 | P31948 | Stress-induced-phosphoprotein 1                     | CYTOSOL           | 22.26  | 22.77  | TRUE  | TRUE  | TRUE |
| 247 | P23246 | Splicing factor, proline- and glutamine-rich        | NUCLEUS           | 2.00   | -33.44 | TRUE  | TRUE  | TRUE |
| 248 | P49756 | RNA-binding protein 25                              | NUCLEUS           | -9.16  | -35.92 | TRUE  | TRUE  | TRUE |
| 249 | P62269 | 40S ribosomal protein S18                           | RIBOSOME 40S      | 10.97  | -23.12 | FALSE | TRUE  | TRUE |
| 250 | O43143 | Pre-mRNA-splicing factor ATP-dependent              | NUCLEUS           | -12.60 | -29.38 | TRUE  | TRUE  | TRUE |
| 251 | Q7Z6E9 | E3 ubiquitin-protein ligase RBBP6                   | NUCLEUS           | -10.08 | -35.24 | TRUE  | TRUE  | TRUE |
| 252 | Q9P258 | Protein RCC2                                        | unknown           | -15.60 | -17.90 | FALSE | TRUE  | TRUE |
| 253 | P00367 | Glutamate dehydrogenase 1, mitochondrial            | MITOCHONDRIA      | 33.27  | -14.00 | FALSE | TRUE  | TRUE |
| 254 | P00966 | Argininosuccinate synthase                          | unknown           | 10.05  | -2.65  | FALSE | TRUE  | TRUE |
| 255 | P29692 | Elongation factor 1-delta                           | NUCLEUS           | -8.70  | -13.58 | FALSE | TRUE  | TRUE |
| 256 | P29692 | Elongation factor 1-delta                           | NUCLEUS           | 2.09   | 6.56   | FALSE | TRUE  | TRUE |
| 257 | P61006 | Ras-related protein Rab-8A                          | PM                | -28.69 | 12.05  | TRUE  | TRUE  | TRUE |
| 258 | P62277 | 40S ribosomal protein S13                           | RIBOSOME 40S      | 11.88  | -23.11 | FALSE | TRUE  | TRUE |
| 259 | Q9Y230 | RuvB-like 2                                         | NUCLEUS           | -13.57 | -27.19 | TRUE  | TRUE  | TRUE |
| 260 | P84085 | ADP-ribosylation factor 5                           | unknown           | 14.60  | 6.48   | TRUE  | TRUE  | TRUE |
| 261 | P22234 | Multifunctional protein ADE2                        | unknown           | 13.08  | -2.06  | TRUE  | TRUE  | TRUE |
| 262 | O95433 | Activator of 90 kDa heat shock protein              | unknown           | 20.55  | 18.96  | FALSE | TRUE  | TRUE |

|     |        |                                        |              |        |        |       |      |      |
|-----|--------|----------------------------------------|--------------|--------|--------|-------|------|------|
| 263 | P46940 | Ras GTPase-activating-like protein I   | unknown      | 3.25   | 9.11   | TRUE  | TRUE | TRUE |
| 264 | P40926 | Malate dehydrogenase, mitochond        | MITOCHONDRIA | 40.13  | -3.97  | FALSE | TRUE | TRUE |
| 265 | Q9Y3F4 | Serine-threonine kinase receptor-a     | unknown      | 18.04  | 10.51  | FALSE | TRUE | TRUE |
| 266 | Q14839 | Chromodomain-helicase-DNA-bind         | NUCLEUS      | -25.65 | -25.98 | TRUE  | TRUE | TRUE |
| 267 | P09382 | Galectin-1                             | CYTOSOL      | 15.26  | 18.52  | FALSE | TRUE | TRUE |
| 268 | P05198 | Eukaryotic translation initiation fact | unknown      | 9.82   | -1.65  | FALSE | TRUE | TRUE |
| 269 | P52272 | Heterogeneous nuclear ribonucleop      | NUCLEUS      | -12.12 | -35.94 | TRUE  | TRUE | TRUE |
| 270 | P55265 | Double-stranded RNA-specific aden      | NUCLEUS      | -10.23 | -35.84 | FALSE | TRUE | TRUE |
| 271 | P46779 | 60S ribosomal protein L28              | RIBOSOME 60S | 17.65  | -21.02 | TRUE  | TRUE | TRUE |
| 272 | P07237 | Protein disulfide-isomerase            | ER           | -0.80  | 39.13  | FALSE | TRUE | TRUE |
| 273 | P04792 | Heat shock protein beta-1              | unknown      | 9.33   | 18.75  | TRUE  | TRUE | TRUE |
| 274 | Q13162 | Peroxiredoxin-4                        | unknown      | 1.19   | 39.97  | TRUE  | TRUE | TRUE |
| 275 | O15371 | Eukaryotic translation initiation fact | unknown      | 13.73  | -10.93 | FALSE | TRUE | TRUE |
| 276 | Q9BQ39 | ATP-dependent RNA helicase DDX5        | NUCLEUS      | -1.22  | -35.11 | FALSE | TRUE | TRUE |
| 277 | P51659 | Peroxisomal multifunctional enzym      | PEROXISOME   | 52.72  | -3.48  | FALSE | TRUE | TRUE |
| 278 | Q13200 | 26S proteasome non-ATPase regul        | PROTEASOME   | 21.54  | 6.80   | FALSE | TRUE | TRUE |
| 279 | Q14690 | Protein RRP5 homolog                   | NUCLEUS      | -1.15  | -41.12 | FALSE | TRUE | TRUE |
| 280 | Q8TDN6 | Ribosome biogenesis protein BRX1 I     | NUCLEUS      | 0.36   | -37.46 | FALSE | TRUE | TRUE |
| 281 | P26368 | Splicing factor U2AF 65 kDa subuni     | NUCLEUS      | -6.29  | -31.56 | TRUE  | TRUE | TRUE |
| 282 | P62879 | Guanine nucleotide-binding protein     | PM           | -27.45 | 7.10   | FALSE | TRUE | TRUE |
| 283 | P12004 | Proliferating cell nuclear antigen     | unknown      | 26.44  | 21.57  | FALSE | TRUE | TRUE |
| 284 | P49915 | GMP synthase [glutamine-hydrolyz       | CYTOSOL      | 17.49  | 6.28   | FALSE | TRUE | TRUE |
| 285 | O00299 | Chloride intracellular channel protei  | unknown      | 12.99  | 15.68  | FALSE | TRUE | TRUE |
| 286 | P41440 | Folate transporter 1                   | PM           | -29.95 | 9.67   | TRUE  | TRUE | TRUE |
| 287 | Q13347 | Eukaryotic translation initiation fact | unknown      | 13.53  | -10.84 | FALSE | TRUE | TRUE |
| 288 | P31939 | Bifunctional purine biosynthesis pro   | CYTOSOL      | 20.41  | 20.74  | FALSE | TRUE | TRUE |
| 289 | Q96E39 | RNA binding motif protein, X-linked-   | NUCLEUS      | 1.56   | -35.55 | TRUE  | TRUE | TRUE |
| 290 | P30101 | Protein disulfide-isomerase A3         | ER           | -6.18  | 35.78  | FALSE | TRUE | TRUE |
| 291 | Q99848 | Probable rRNA-processing protein E     | NUCLEUS      | 0.90   | -35.44 | TRUE  | TRUE | TRUE |
| 292 | Q9BZE4 | Nucleolar GTP-binding protein 1        | NUCLEUS      | 1.93   | -37.90 | FALSE | TRUE | TRUE |
| 293 | P22102 | Trifunctional purine biosynthetic pro  | CYTOSOL      | 15.66  | 5.16   | FALSE | TRUE | TRUE |
| 294 | Q99575 | Ribonucleases P/MRP protein subu       | NUCLEUS      | -0.71  | -25.16 | FALSE | TRUE | TRUE |
| 295 | Q96RQ3 | Methylcrotonoyl-CoA carboxylase s      | MITOCHONDRIA | 39.74  | -9.35  | TRUE  | TRUE | TRUE |
| 296 | P30086 | Phosphatidylethanolamine-binding       | CYTOSOL      | 23.35  | 19.57  | TRUE  | TRUE | TRUE |
| 297 | P17812 | CTP synthase 1                         | unknown      | 15.48  | 5.83   | FALSE | TRUE | TRUE |
| 298 | Q14974 | Importin subunit beta-1                | unknown      | 21.41  | 12.01  | FALSE | TRUE | TRUE |
| 299 | P67809 | Nuclease-sensitive element-binding     | NUCLEUS      | 6.95   | -12.17 | FALSE | TRUE | TRUE |
| 300 | P62851 | 40S ribosomal protein S25              | unknown      | 12.86  | -19.15 | FALSE | TRUE | TRUE |



|     |        |                                        |              |        |        |       |      |      |
|-----|--------|----------------------------------------|--------------|--------|--------|-------|------|------|
| 301 | O15067 | Phosphoribosylformylglycinamidine      | CYTOSOL      | 21.21  | 22.84  | FALSE | TRUE | TRUE |
| 302 | P11586 | C-1-tetrahydrofolate synthase, cyto    | RIBOSOME 60S | 15.25  | -21.44 | FALSE | TRUE | TRUE |
| 303 | P18085 | ADP-ribosylation factor 4              | unknown      | 10.72  | 8.24   | FALSE | TRUE | TRUE |
| 304 | Q08J23 | tRNA (cytosine(34)-C(5))-methyltra     | unknown      | 16.69  | 6.37   | TRUE  | TRUE | TRUE |
| 305 | P04083 | Annexin A1                             | unknown      | 14.47  | 18.56  | TRUE  | TRUE | TRUE |
| 306 | P09960 | Leukotriene A-4 hydrolase              | unknown      | 24.39  | 23.73  | FALSE | TRUE | TRUE |
| 307 | P09429 | High mobility group protein B1         | unknown      | -12.63 | -8.51  | FALSE | TRUE | TRUE |
| 308 | Q96PK6 | RNA-binding protein 14                 | NUCLEUS      | -9.34  | -34.88 | FALSE | TRUE | TRUE |
| 309 | P35232 | Prohibitin                             | MITOCHONDRIA | 33.99  | -8.06  | FALSE | TRUE | TRUE |
| 310 | Q9BQG0 | Myb-binding protein 1A                 | NUCLEUS      | 0.42   | -39.38 | TRUE  | TRUE | TRUE |
| 311 | O43776 | Asparagine--tRNA ligase, cytoplasm     | unknown      | 19.95  | 9.94   | FALSE | TRUE | TRUE |
| 312 | Q15181 | Inorganic pyrophosphatase              | unknown      | 18.03  | 24.51  | FALSE | TRUE | TRUE |
| 313 | Q15393 | Splicing factor 3B subunit 3           | NUCLEUS      | 4.04   | -35.57 | FALSE | TRUE | TRUE |
| 314 | P51148 | Ras-related protein Rab-5C             | unknown      | -23.68 | 1.41   | FALSE | TRUE | TRUE |
| 315 | P12814 | Alpha-actinin-1                        | unknown      | 4.03   | 9.41   | FALSE | TRUE | TRUE |
| 316 | Q12907 | Vesicular integral-membrane prote      | unknown      | -9.77  | 32.76  | FALSE | TRUE | TRUE |
| 317 | Q16658 | Fascin                                 | unknown      | 10.61  | 14.51  | FALSE | TRUE | TRUE |
| 318 | P41252 | Isoleucine--tRNA ligase, cytoplasm     | unknown      | 5.80   | -3.22  | FALSE | TRUE | TRUE |
| 319 | Q92598 | Heat shock protein 105 kDa             | CYTOSOL      | 21.46  | 18.70  | FALSE | TRUE | TRUE |
| 320 | P08237 | ATP-dependent 6-phosphofructokin       | unknown      | 2.56   | -15.37 | FALSE | TRUE | TRUE |
| 321 | P31153 | S-adenosylmethionine synthase isc      | CYTOSOL      | 23.63  | 20.15  | FALSE | TRUE | TRUE |
| 322 | P00491 | Purine nucleoside phosphorylase        | unknown      | 24.09  | 22.25  | FALSE | TRUE | TRUE |
| 323 | Q9Y277 | Voltage-dependent anion-selective      | unknown      | 28.31  | -6.39  | FALSE | TRUE | TRUE |
| 324 | P20700 | Lamin-B1                               | unknown      | 23.61  | -12.61 | TRUE  | TRUE | TRUE |
| 325 | Q14498 | RNA-binding protein 39                 | NUCLEUS      | 2.99   | -31.24 | TRUE  | TRUE | TRUE |
| 326 | Q99497 | Protein/nucleic acid deglycase DJ-1    | unknown      | 9.67   | 9.18   | FALSE | TRUE | TRUE |
| 327 | P18206 | Vinculin                               | unknown      | 12.84  | 15.48  | TRUE  | TRUE | TRUE |
| 328 | P55209 | Nucleosome assembly protein 1-lik      | CYTOSOL      | 16.48  | 17.25  | TRUE  | TRUE | TRUE |
| 329 | P46782 | 40S ribosomal protein S5               | RIBOSOME 40S | 11.18  | -22.06 | FALSE | TRUE | TRUE |
| 330 | Q13247 | Serine/arginine-rich splicing factor 6 | unknown      | -10.85 | -30.75 | FALSE | TRUE | TRUE |
| 331 | P41250 | Glycine--tRNA ligase                   | unknown      | 9.68   | 9.03   | FALSE | TRUE | TRUE |
| 332 | P55884 | Eukaryotic translation initiation fact | unknown      | 13.29  | -10.80 | TRUE  | TRUE | TRUE |
| 333 | P39019 | 40S ribosomal protein S19              | RIBOSOME 40S | 11.85  | -23.20 | TRUE  | TRUE | TRUE |
| 334 | P13489 | Ribonuclease inhibitor                 | CYTOSOL      | 21.23  | 20.68  | FALSE | TRUE | TRUE |
| 335 | O75534 | Cold shock domain-containing prote     | unknown      | 14.51  | 4.74   | TRUE  | TRUE | TRUE |
| 336 | Q9HAV0 | Guanine nucleotide-binding protein     | PM           | -29.58 | 2.14   | FALSE | TRUE | TRUE |
| 337 | P49736 | DNA replication licensing factor MC    | unknown      | 24.19  | 14.14  | FALSE | TRUE | TRUE |
| 338 | Q01650 | Large neutral amino acids transport    | PM           | -26.50 | 6.16   | TRUE  | TRUE | TRUE |

|     |        |                                                 |                   |        |        |       |      |      |
|-----|--------|-------------------------------------------------|-------------------|--------|--------|-------|------|------|
| 339 | Q99729 | Heterogeneous nuclear ribonucleoprotein A1      | NUCLEUS           | -20.35 | -33.06 | FALSE | TRUE | TRUE |
| 340 | O75694 | Nuclear pore complex protein Nup133             | NUCLEUS           | -22.01 | -29.58 | FALSE | TRUE | TRUE |
| 341 | O43242 | 26S proteasome non-ATPase regulatory subunit 1  | PROTEASOME        | 20.67  | 6.00   | FALSE | TRUE | TRUE |
| 342 | Q04637 | Eukaryotic translation initiation factor 4E     | NUCLEUS           | -1.55  | -15.34 | TRUE  | TRUE | TRUE |
| 343 | P56192 | Methionine--tRNA ligase, cytoplasmic            | unknown           | 5.87   | -3.15  | FALSE | TRUE | TRUE |
| 344 | P52597 | Heterogeneous nuclear ribonucleoprotein A2      | unknown           | -15.72 | -31.72 | TRUE  | TRUE | TRUE |
| 345 | Q13151 | Heterogeneous nuclear ribonucleoprotein A1      | NUCLEUS           | -12.62 | -35.62 | FALSE | TRUE | TRUE |
| 346 | P51153 | Ras-related protein Rab-13                      | PM                | -25.24 | 12.88  | FALSE | TRUE | TRUE |
| 347 | P26640 | Valine--tRNA ligase                             | unknown           | 14.69  | 4.63   | TRUE  | TRUE | TRUE |
| 348 | P33991 | DNA replication licensing factor MCM5           | unknown           | -15.52 | -31.48 | FALSE | TRUE | TRUE |
| 349 | P18754 | Regulator of chromosome condensation 1          | NUCLEUS-CHROMATIN | -22.49 | -16.08 | FALSE | TRUE | TRUE |
| 350 | P55786 | Puromycin-sensitive aminopeptidase              | CYTOSOL           | 17.97  | 15.39  | FALSE | TRUE | TRUE |
| 351 | Q15717 | ELAV-like protein 1                             | NUCLEUS           | -13.78 | -36.52 | FALSE | TRUE | TRUE |
| 352 | Q92621 | Nuclear pore complex protein Nup205             | NUCLEUS           | -21.26 | -29.54 | FALSE | TRUE | TRUE |
| 353 | Q9P2J5 | Leucine--tRNA ligase, cytoplasmic               | unknown           | 21.01  | 12.04  | FALSE | TRUE | TRUE |
| 354 | Q15050 | Ribosome biogenesis regulatory protein          | NUCLEUS           | 1.82   | -37.86 | TRUE  | TRUE | TRUE |
| 355 | P17858 | ATP-dependent 6-phosphofructokinase             | unknown           | 8.38   | -4.44  | FALSE | TRUE | TRUE |
| 356 | P67936 | Tropomyosin alpha-4 chain                       | unknown           | 10.25  | 18.74  | FALSE | TRUE | TRUE |
| 357 | Q10471 | Polypeptide N-acetylgalactosaminyltransferase 1 | GOLGI             | -19.34 | 32.43  | FALSE | TRUE | TRUE |
| 358 | P62857 | 40S ribosomal protein S28                       | RIBOSOME 40S      | 11.19  | -23.02 | FALSE | TRUE | TRUE |
| 359 | Q02880 | DNA topoisomerase 2-beta                        | NUCLEUS-CHROMATIN | -21.42 | -13.54 | TRUE  | TRUE | TRUE |
| 360 | Q15084 | Protein disulfide-isomerase A6                  | ER                | 1.46   | 39.28  | FALSE | TRUE | TRUE |
| 361 | P62873 | Guanine nucleotide-binding protein gamma-1      | PM                | -27.75 | 6.84   | FALSE | TRUE | TRUE |
| 362 | P08621 | U1 small nuclear ribonucleoprotein              | NUCLEUS           | 6.10   | -34.33 | FALSE | TRUE | TRUE |
| 363 | Q13813 | Spectrin alpha chain, non-erythrocytic          | unknown           | 1.88   | 26.12  | TRUE  | TRUE | TRUE |
| 364 | Q13813 | Spectrin alpha chain, non-erythrocytic          | unknown           | 1.91   | 26.07  | TRUE  | TRUE | TRUE |
| 365 | P60953 | Cell division control protein 42 homolog        | PM                | -23.38 | 13.73  | TRUE  | TRUE | TRUE |
| 366 | P06753 | Tropomyosin alpha-3 chain                       | unknown           | 10.28  | 13.07  | FALSE | TRUE | TRUE |
| 367 | O75390 | Citrate synthase, mitochondrial                 | MITOCHONDRIA      | 40.98  | -8.15  | FALSE | TRUE | TRUE |
| 368 | Q96GQ7 | Probable ATP-dependent RNA helicase             | NUCLEUS           | 0.91   | -36.59 | FALSE | TRUE | TRUE |
| 369 | Q2NL82 | Pre-rRNA-processing protein TSR1                | NUCLEUS           | 3.86   | -31.08 | FALSE | TRUE | TRUE |
| 370 | Q14566 | DNA replication licensing factor MCM5           | unknown           | -15.94 | -31.97 | FALSE | TRUE | TRUE |
| 371 | Q9Y617 | Phosphoserine aminotransferase                  | CYTOSOL           | 20.97  | 22.88  | FALSE | TRUE | TRUE |
| 372 | Q8NI36 | WD repeat-containing protein 36                 | NUCLEUS           | -1.78  | -40.80 | FALSE | TRUE | TRUE |
| 373 | Q05519 | Serine/arginine-rich splicing factor 1          | NUCLEUS           | 3.95   | -31.25 | FALSE | TRUE | TRUE |
| 374 | P08243 | Asparagine synthetase [glutamine-dependent]     | CYTOSOL           | 20.45  | 14.42  | FALSE | TRUE | TRUE |
| 375 | P53985 | Monocarboxylate transporter 1                   | PM                | -24.11 | 18.08  | TRUE  | TRUE | TRUE |
| 376 | P60891 | Ribose-phosphate pyrophosphokinase              | unknown           | 8.14   | -4.66  | FALSE | TRUE | TRUE |

|     |        |                                        |              |        |        |       |      |       |
|-----|--------|----------------------------------------|--------------|--------|--------|-------|------|-------|
| 377 | P62495 | Eukaryotic peptide chain release fa    | unknown      | -7.99  | -0.37  | FALSE | TRUE | TRUE  |
| 378 | O43684 | Mitotic checkpoint protein BUB3        | NUCLEUS      | 1.53   | -30.44 | FALSE | TRUE | TRUE  |
| 379 | Q8IYB3 | Serine/arginine repetitive matrix pr   | NUCLEUS      | 0.99   | -19.22 | TRUE  | TRUE | TRUE  |
| 380 | Q8NBJ5 | Procollagen galactosyltransferase 1    | ER           | 4.56   | 39.09  | FALSE | TRUE | TRUE  |
| 381 | P42704 | Leucine-rich PPR motif-containing p    | MITOCHONDRIA | 42.73  | -11.81 | FALSE | TRUE | TRUE  |
| 382 | Q9UMS4 | Pre-mRNA-processing factor 19          | NUCLEUS      | -3.09  | -32.14 | FALSE | TRUE | TRUE  |
| 383 | Q9NQ29 | Putative RNA-binding protein Luc7-l    | unknown      | 7.40   | -24.29 | FALSE | TRUE | TRUE  |
| 384 | Q9NVP1 | ATP-dependent RNA helicase DDX1        | NUCLEUS      | 0.41   | -36.38 | FALSE | TRUE | TRUE  |
| 385 | Q13283 | Ras GTPase-activating protein-bind     | unknown      | 9.04   | -20.96 | TRUE  | TRUE | TRUE  |
| 386 | Q9Y265 | RuvB-like 1                            | NUCLEUS      | -13.39 | -26.92 | TRUE  | TRUE | TRUE  |
| 387 | P61513 | 60S ribosomal protein L37a             | RIBOSOME 60S | 17.49  | -21.08 | FALSE | TRUE | TRUE  |
| 388 | Q7L2E3 | ATP-dependent RNA helicase DHX3        | unknown      | -7.93  | -3.13  | FALSE | TRUE | TRUE  |
| 389 | Q15185 | Prostaglandin E synthase 3             | CYTOSOL      | 17.67  | 14.28  | FALSE | TRUE | TRUE  |
| 390 | Q9NZ01 | Very-long-chain enoyl-CoA reducta      | ER           | 3.21   | 32.92  | FALSE | TRUE | TRUE  |
| 391 | P62136 | Serine/threonine-protein phosphat      | unknown      | 1.53   | -7.79  | FALSE | TRUE | FALSE |
| 392 | P08754 | Guanine nucleotide-binding protein     | PM           | -24.52 | 15.65  | FALSE | TRUE | TRUE  |
| 393 | P62140 | Serine/threonine-protein phosphat      | NUCLEUS      | 1.48   | -7.78  | FALSE | TRUE | TRUE  |
| 394 | P05386 | 60S acidic ribosomal protein P1        | RIBOSOME 60S | 15.84  | -20.59 | FALSE | TRUE | TRUE  |
| 395 | P13667 | Protein disulfide-isomerase A4         | ER           | -0.70  | 39.68  | FALSE | TRUE | TRUE  |
| 396 | P52701 | DNA mismatch repair protein Msh6       | NUCLEUS      | -10.44 | -14.61 | FALSE | TRUE | TRUE  |
| 397 | P38606 | V-type proton ATPase catalytic sub     | unknown      | -17.50 | 3.82   | FALSE | TRUE | TRUE  |
| 398 | Q9H583 | HEAT repeat-containing protein 1       | NUCLEUS      | -2.49  | -41.32 | FALSE | TRUE | TRUE  |
| 399 | Q96AG4 | Leucine-rich repeat-containing prot    | unknown      | 4.54   | 37.62  | TRUE  | TRUE | TRUE  |
| 400 | P18077 | 60S ribosomal protein L35a             | RIBOSOME 60S | 16.81  | -21.37 | FALSE | TRUE | TRUE  |
| 401 | Q14152 | Eukaryotic translation initiation fact | unknown      | 13.70  | -10.98 | FALSE | TRUE | TRUE  |
| 402 | P06493 | Cyclin-dependent kinase 1              | unknown      | -4.54  | -8.01  | FALSE | TRUE | TRUE  |
| 403 | Q9Y3I0 | tRNA-splicing ligase RtcB homolog      | unknown      | 5.31   | -24.86 | FALSE | TRUE | TRUE  |
| 404 | Q7Z2W4 | Zinc finger CCCH-type antiviral prot   | unknown      | -7.95  | -0.26  | TRUE  | TRUE | TRUE  |
| 405 | P84098 | 60S ribosomal protein L19              | RIBOSOME 60S | 16.25  | -21.71 | TRUE  | TRUE | TRUE  |
| 406 | P63000 | Ras-related C3 botulinum toxin subs    | PM           | -25.72 | 11.25  | FALSE | TRUE | FALSE |
| 407 | Q13263 | Transcription intermediary factor 1-   | NUCLEUS      | -13.80 | -29.50 | TRUE  | TRUE | TRUE  |
| 408 | P11908 | Ribose-phosphate pyrophosphokin        | unknown      | 8.23   | -1.76  | FALSE | TRUE | TRUE  |
| 409 | P35613 | Basigin                                | PM           | -26.78 | 12.42  | TRUE  | TRUE | TRUE  |
| 410 | Q9Y5B9 | FACT complex subunit SPT16             | unknown      | -12.26 | -8.93  | FALSE | TRUE | TRUE  |
| 411 | P42766 | 60S ribosomal protein L35              | RIBOSOME 60S | 17.83  | -22.46 | TRUE  | TRUE | TRUE  |
| 412 | P14550 | Alcohol dehydrogenase [NADP(+)]        | CYTOSOL      | 22.81  | 21.63  | FALSE | TRUE | TRUE  |
| 413 | Q92769 | Histone deacetylase 2                  | NUCLEUS      | -25.22 | -27.51 | FALSE | TRUE | TRUE  |
| 414 | Q01081 | Splicing factor U2AF 35 kDa subunit    | NUCLEUS      | 1.82   | -27.85 | TRUE  | TRUE | TRUE  |

|     |        |                                        |              |        |        |       |      |      |
|-----|--------|----------------------------------------|--------------|--------|--------|-------|------|------|
| 415 | O00159 | Unconventional myosin-Ic               | unknown      | -9.77  | 25.21  | FALSE | TRUE | TRUE |
| 416 | Q12905 | Interleukin enhancer-binding factor    | NUCLEUS      | -12.06 | -35.66 | FALSE | TRUE | TRUE |
| 417 | Q16576 | Histone-binding protein RBBP7          | unknown      | -16.24 | -31.30 | FALSE | TRUE | TRUE |
| 418 | Q9ULV4 | Coronin-1C                             | unknown      | -3.49  | 1.95   | TRUE  | TRUE | TRUE |
| 419 | P31150 | Rab GDP dissociation inhibitor alpha   | unknown      | 16.16  | 23.29  | FALSE | TRUE | TRUE |
| 420 | Q13523 | Serine/threonine-protein kinase PR     | NUCLEUS      | 2.88   | -33.34 | TRUE  | TRUE | TRUE |
| 421 | P30044 | Peroxiredoxin-5, mitochondrial         | unknown      | 22.23  | -3.90  | FALSE | TRUE | TRUE |
| 422 | O00410 | Importin-5                             | unknown      | 9.80   | 8.78   | FALSE | TRUE | TRUE |
| 423 | P61586 | Transforming protein RhoA              | PM           | -29.44 | 8.67   | FALSE | TRUE | TRUE |
| 424 | Q9Y2L1 | Exosome complex exonuclease RRP        | NUCLEUS      | -13.37 | -27.07 | FALSE | TRUE | TRUE |
| 425 | O76094 | Signal recognition particle subunit S  | unknown      | 5.33   | -4.05  | FALSE | TRUE | TRUE |
| 426 | P16989 | Y-box-binding protein 3                | NUCLEUS      | 9.49   | -6.90  | FALSE | TRUE | TRUE |
| 427 | P43243 | Matrin-3                               | NUCLEUS      | -11.37 | -36.46 | TRUE  | TRUE | TRUE |
| 428 | P62995 | Transformer-2 protein homolog bet      | NUCLEUS      | -6.17  | -39.08 | FALSE | TRUE | TRUE |
| 429 | P63220 | 40S ribosomal protein S21              | RIBOSOME 40S | 11.73  | -22.25 | FALSE | TRUE | TRUE |
| 430 | Q8NC51 | Plasminogen activator inhibitor 1 R    | unknown      | 10.25  | -21.18 | TRUE  | TRUE | TRUE |
| 431 | Q92688 | Acidic leucine-rich nuclear phospho    | unknown      | 9.77   | 8.11   | FALSE | TRUE | TRUE |
| 432 | P46783 | 40S ribosomal protein S10              | RIBOSOME 40S | 10.99  | -22.86 | FALSE | TRUE | TRUE |
| 433 | Q9BUQ8 | Probable ATP-dependent RNA helic       | NUCLEUS      | 3.50   | -34.35 | FALSE | TRUE | TRUE |
| 434 | Q13085 | Acetyl-CoA carboxylase 1               | unknown      | 9.85   | -2.81  | TRUE  | TRUE | TRUE |
| 435 | P31949 | Protein S100-A11                       | unknown      | 15.12  | 18.68  | TRUE  | TRUE | TRUE |
| 436 | O43865 | S-adenosylhomocysteine hydrolase       | unknown      | 7.02   | 7.85   | TRUE  | TRUE | TRUE |
| 437 | P51858 | Hepatoma-derived growth factor         | unknown      | 26.95  | 21.86  | FALSE | TRUE | TRUE |
| 438 | P52565 | Rho GDP-dissociation inhibitor 1       | unknown      | 18.03  | 24.49  | FALSE | TRUE | TRUE |
| 439 | P14314 | Glucosidase 2 subunit beta             | ER           | -2.43  | 37.47  | FALSE | TRUE | TRUE |
| 440 | O15144 | Actin-related protein 2/3 complex s    | unknown      | 1.84   | -15.37 | FALSE | TRUE | TRUE |
| 441 | P20339 | Ras-related protein Rab-5A             | unknown      | -19.62 | 13.04  | FALSE | TRUE | TRUE |
| 442 | Q96AE4 | Far upstream element-binding prot      | unknown      | -13.90 | -31.77 | TRUE  | TRUE | TRUE |
| 443 | Q96AE4 | Far upstream element-binding prot      | unknown      | -13.73 | -31.85 | TRUE  | TRUE | TRUE |
| 444 | P19623 | Spermidine synthase                    | CYTOSOL      | 21.18  | 18.62  | FALSE | TRUE | TRUE |
| 445 | O14818 | Proteasome subunit alpha type-7        | PROTEASOME   | 20.89  | 5.75   | FALSE | TRUE | TRUE |
| 446 | Q8IVT2 | Mitotic interactor and substrate of p  | unknown      | -6.07  | 10.31  | TRUE  | TRUE | TRUE |
| 447 | P17931 | Galectin-3                             | unknown      | -24.29 | 16.59  | FALSE | TRUE | TRUE |
| 448 | P20042 | Eukaryotic translation initiation fact | NUCLEUS      | -3.30  | -13.86 | TRUE  | TRUE | TRUE |
| 449 | P13693 | Translationally-controlled tumor pro   | unknown      | 14.70  | -10.35 | FALSE | TRUE | TRUE |
| 450 | Q13185 | Chromobox protein homolog 3            | NUCLEUS      | -15.71 | -29.35 | TRUE  | TRUE | TRUE |
| 451 | Q16181 | Septin-7                               | unknown      | -2.47  | 4.98   | TRUE  | TRUE | TRUE |
| 452 | Q16181 | Septin-7                               | unknown      | -2.33  | 4.94   | TRUE  | TRUE | TRUE |

|     |        |                                                  |              |        |        |       |      |      |
|-----|--------|--------------------------------------------------|--------------|--------|--------|-------|------|------|
| 453 | P12268 | Inosine-5'-monophosphate dehydratase             | PROTEASOME   | 20.62  | 6.46   | FALSE | TRUE | TRUE |
| 454 | Q9UNX4 | WD repeat-containing protein 3                   | NUCLEUS      | -1.39  | -40.57 | FALSE | TRUE | TRUE |
| 455 | P55084 | Trifunctional enzyme subunit beta, mitochondrial | MITOCHONDRIA | 41.47  | -4.66  | FALSE | TRUE | TRUE |
| 456 | O75153 | Clustered mitochondria protein homolog           | unknown      | 8.73   | -13.63 | FALSE | TRUE | TRUE |
| 457 | P04899 | Guanine nucleotide-binding protein gamma-13      | PM           | -26.14 | 14.20  | FALSE | TRUE | TRUE |
| 458 | Q96T88 | E3 ubiquitin-protein ligase UHRF1                | NUCLEUS      | -25.79 | -23.64 | FALSE | TRUE | TRUE |
| 459 | P15170 | Eukaryotic peptide chain release factor 1        | CYTOSOL      | 19.00  | 11.51  | TRUE  | TRUE | TRUE |
| 460 | P21291 | Cysteine and glycine-rich protein 1              | unknown      | -5.94  | -2.37  | TRUE  | TRUE | TRUE |
| 461 | O94776 | Metastasis-associated protein MTA1               | NUCLEUS      | -20.38 | -32.17 | TRUE  | TRUE | TRUE |
| 462 | P00505 | Aspartate aminotransferase, mitochondrial        | MITOCHONDRIA | 35.56  | -4.98  | FALSE | TRUE | TRUE |
| 463 | P98179 | RNA-binding protein 3                            | NUCLEUS      | -19.17 | -32.68 | FALSE | TRUE | TRUE |
| 464 | Q01082 | Spectrin beta chain, non-erythrocyte             | unknown      | 1.29   | 25.34  | TRUE  | TRUE | TRUE |
| 465 | Q01082 | Spectrin beta chain, non-erythrocyte             | unknown      | 1.65   | 26.00  | TRUE  | TRUE | TRUE |
| 466 | P28066 | Proteasome subunit alpha type-5                  | PROTEASOME   | 22.19  | 6.71   | FALSE | TRUE | TRUE |
| 467 | P31930 | Cytochrome b-c1 complex subunit 1                | MITOCHONDRIA | 31.94  | -13.45 | FALSE | TRUE | TRUE |
| 468 | Q15019 | Septin-2                                         | unknown      | -2.39  | 4.73   | TRUE  | TRUE | TRUE |
| 469 | O95232 | Luc7-like protein 3                              | unknown      | 5.93   | -26.30 | TRUE  | TRUE | TRUE |
| 470 | P61619 | Protein transport protein Sec61 subunit          | ER           | 5.76   | 37.40  | FALSE | TRUE | TRUE |
| 471 | P46063 | ATP-dependent DNA helicase Q1                    | unknown      | -21.41 | -21.39 | FALSE | TRUE | TRUE |
| 472 | Q08945 | FACT complex subunit SSRP1                       | unknown      | -12.27 | -8.99  | FALSE | TRUE | TRUE |
| 473 | O95831 | Apoptosis-inducing factor 1, mitochondrial       | MITOCHONDRIA | 34.34  | -11.85 | FALSE | TRUE | TRUE |
| 474 | P30740 | Leukocyte elastase inhibitor                     | CYTOSOL      | 11.76  | 20.41  | FALSE | TRUE | TRUE |
| 475 | O75821 | Eukaryotic translation initiation factor 4E      | unknown      | 13.16  | -10.81 | TRUE  | TRUE | TRUE |
| 476 | P51572 | B-cell receptor-associated protein 3             | ER           | -11.18 | 30.26  | FALSE | TRUE | TRUE |
| 477 | Q16881 | Thioredoxin reductase 1, cytoplasmic             | unknown      | 13.39  | 16.86  | TRUE  | TRUE | TRUE |
| 478 | P61019 | Ras-related protein Rab-2A                       | unknown      | -18.45 | 20.95  | FALSE | TRUE | TRUE |
| 479 | O14744 | Protein arginine N-methyltransferase             | unknown      | 18.36  | 16.85  | FALSE | TRUE | TRUE |
| 480 | O95373 | Importin-7                                       | unknown      | 19.36  | 15.98  | FALSE | TRUE | TRUE |
| 481 | Q15369 | Elongin-C                                        | unknown      | 19.47  | 11.97  | FALSE | TRUE | TRUE |
| 482 | P51571 | Translocon-associated protein subunit            | ER           | 2.48   | 35.39  | FALSE | TRUE | TRUE |
| 483 | O96019 | Actin-like protein 6A                            | NUCLEUS      | -17.07 | -28.30 | FALSE | TRUE | TRUE |
| 484 | Q02040 | A-kinase anchor protein 17A                      | NUCLEUS      | 1.12   | -28.98 | TRUE  | TRUE | TRUE |
| 485 | P08559 | Pyruvate dehydrogenase E1 component              | MITOCHONDRIA | 44.03  | -12.40 | FALSE | TRUE | TRUE |
| 486 | P13987 | CD59 glycoprotein                                | unknown      | -21.58 | 10.55  | FALSE | TRUE | TRUE |
| 487 | P30520 | Adenylosuccinate synthetase isozyme              | CYTOSOL      | 22.83  | 19.22  | FALSE | TRUE | TRUE |
| 488 | P49755 | Transmembrane emp24 domain-containing protein    | unknown      | -12.95 | 30.72  | FALSE | TRUE | TRUE |
| 489 | Q9Y3U8 | 60S ribosomal protein L36                        | RIBOSOME 60S | 18.10  | -21.69 | TRUE  | TRUE | TRUE |
| 490 | Q92499 | ATP-dependent RNA helicase DDX1                  | unknown      | 5.23   | -25.00 | FALSE | TRUE | TRUE |

|     |        |                                        |                   |        |        |       |      |      |
|-----|--------|----------------------------------------|-------------------|--------|--------|-------|------|------|
| 491 | P57088 | Transmembrane protein 33               | unknown           | 6.12   | 35.21  | FALSE | TRUE | TRUE |
| 492 | P20618 | Proteasome subunit beta type-1         | PROTEASOME        | 21.83  | 6.01   | FALSE | TRUE | TRUE |
| 493 | O75131 | Copine-3                               | unknown           | 13.56  | 17.44  | FALSE | TRUE | TRUE |
| 494 | P35998 | 26S proteasome regulatory subunit      | PROTEASOME        | 20.48  | 6.72   | TRUE  | TRUE | TRUE |
| 495 | Q9UHD8 | Septin-9                               | unknown           | -1.97  | 4.39   | TRUE  | TRUE | TRUE |
| 496 | Q96RP9 | Elongation factor G, mitochondrial     | MITOCHONDRIA      | 38.19  | -8.51  | FALSE | TRUE | TRUE |
| 497 | Q01518 | Adenylyl cyclase-associated protein    | CYTOSOL           | 13.92  | 15.43  | FALSE | TRUE | TRUE |
| 498 | P27694 | Replication protein A 70 kDa DNA-b     | unknown           | 23.45  | 12.66  | TRUE  | TRUE | TRUE |
| 499 | P35637 | RNA-binding protein FUS                | NUCLEUS           | -6.64  | -30.32 | FALSE | TRUE | TRUE |
| 500 | O00622 | Protein CYR61                          | unknown           | -32.86 | 6.50   | FALSE | TRUE | TRUE |
| 501 | P59998 | Actin-related protein 2/3 complex s    | unknown           | 1.54   | -14.55 | FALSE | TRUE | TRUE |
| 502 | Q9BY44 | Eukaryotic translation initiation fact | RIBOSOME 40S      | 11.01  | -22.74 | FALSE | TRUE | TRUE |
| 503 | P22695 | Cytochrome b-c1 complex subunit 2      | MITOCHONDRIA      | 31.83  | -13.23 | FALSE | TRUE | TRUE |
| 504 | P61020 | Ras-related protein Rab-5B             | unknown           | -21.94 | 4.60   | FALSE | TRUE | TRUE |
| 505 | Q14739 | Lamin-B receptor                       | unknown           | 23.82  | -12.10 | FALSE | TRUE | TRUE |
| 506 | O96008 | Mitochondrial import receptor subu     | MITOCHONDRIA      | 30.08  | -6.89  | FALSE | TRUE | TRUE |
| 507 | Q9Y281 | Cofilin-2                              | unknown           | 3.76   | 9.55   | FALSE | TRUE | TRUE |
| 508 | P27695 | DNA-(apurinic or apyrimidinic site) l  | unknown           | -12.09 | -14.54 | FALSE | TRUE | TRUE |
| 509 | Q15287 | RNA-binding protein with serine-rich   | NUCLEUS           | -3.86  | -41.13 | TRUE  | TRUE | TRUE |
| 510 | Q9BUJ2 | Heterogeneous nuclear ribonucleop      | NUCLEUS           | -9.16  | -29.10 | FALSE | TRUE | TRUE |
| 511 | P47897 | Glutamine--tRNA ligase                 | unknown           | 5.67   | -3.29  | FALSE | TRUE | TRUE |
| 512 | P49458 | Signal recognition particle 9 kDa pro  | NUCLEUS           | 9.17   | -6.73  | FALSE | TRUE | TRUE |
| 513 | O60488 | Long-chain-fatty-acid--CoA ligase 4    | unknown           | -1.55  | 26.17  | FALSE | TRUE | TRUE |
| 514 | P20290 | Transcription factor BTF3              | unknown           | 7.92   | -18.18 | FALSE | TRUE | TRUE |
| 515 | Q14692 | Ribosome biogenesis protein BMS1       | NUCLEUS           | -1.55  | -39.15 | TRUE  | TRUE | TRUE |
| 516 | P40925 | Malate dehydrogenase, cytoplasmic      | CYTOSOL           | 21.43  | 21.21  | FALSE | TRUE | TRUE |
| 517 | Q9UBX3 | Mitochondrial dicarboxylate carrier    | MITOCHONDRIA      | 38.69  | -10.83 | FALSE | TRUE | TRUE |
| 518 | P52209 | 6-phosphogluconate dehydrogenase       | unknown           | 24.80  | 20.23  | FALSE | TRUE | TRUE |
| 519 | P26196 | Probable ATP-dependent RNA helic       | unknown           | 5.86   | -20.98 | FALSE | TRUE | TRUE |
| 520 | O15143 | Actin-related protein 2/3 complex s    | unknown           | 1.40   | -14.47 | FALSE | TRUE | TRUE |
| 521 | O60264 | SWI/SNF-related matrix-associated      | NUCLEUS-CHROMATIN | -22.24 | -15.69 | FALSE | TRUE | TRUE |
| 522 | P52292 | Importin subunit alpha-1               | unknown           | 11.81  | 1.13   | FALSE | TRUE | TRUE |
| 523 | P49588 | Alanine--tRNA ligase, cytoplasmic      | CYTOSOL           | 21.76  | 22.70  | TRUE  | TRUE | TRUE |
| 524 | Q7L7X3 | Serine/threonine-protein kinase TA     | unknown           | -14.61 | 13.97  | FALSE | TRUE | TRUE |
| 525 | P16435 | NADPH--cytochrome P450 reductase       | ER                | -10.54 | 30.39  | FALSE | TRUE | TRUE |
| 526 | Q9Y266 | Nuclear migration protein nudC         | unknown           | 23.90  | 23.57  | TRUE  | TRUE | TRUE |
| 527 | P50454 | Serpin H1                              | ER                | 3.04   | 38.39  | FALSE | TRUE | TRUE |
| 528 | P60900 | Proteasome subunit alpha type-6        | PROTEASOME        | 22.29  | 6.44   | FALSE | TRUE | TRUE |

|     |        |                                        |              |        |        |       |      |       |
|-----|--------|----------------------------------------|--------------|--------|--------|-------|------|-------|
| 529 | O75683 | Surfeit locus protein 6                | NUCLEUS      | 2.00   | -37.95 | TRUE  | TRUE | TRUE  |
| 530 | P62314 | Small nuclear ribonucleoprotein Sm     | NUCLEUS      | 5.10   | -35.02 | FALSE | TRUE | TRUE  |
| 531 | P61224 | Ras-related protein Rap-1b             | PM           | -25.86 | 15.15  | FALSE | TRUE | TRUE  |
| 532 | Q15645 | Pachytene checkpoint protein 2 hor     | unknown      | 15.12  | 7.55   | FALSE | TRUE | TRUE  |
| 533 | P47756 | F-actin-capping protein subunit beta   | unknown      | 5.69   | 4.29   | FALSE | TRUE | TRUE  |
| 534 | Q13057 | Bifunctional coenzyme A synthase       | unknown      | 9.21   | 7.87   | FALSE | TRUE | TRUE  |
| 535 | P46977 | Dolichyl-diphosphooligosaccharide-     | unknown      | 5.53   | 37.01  | TRUE  | TRUE | TRUE  |
| 536 | P50502 | Hsc70-interacting protein              | CYTOSOL      | 22.86  | 22.10  | FALSE | TRUE | TRUE  |
| 537 | Q12788 | Transducin beta-like protein 3         | NUCLEUS      | -2.45  | -40.40 | FALSE | TRUE | TRUE  |
| 538 | P34897 | Serine hydroxymethyltransferase, r     | MITOCHONDRIA | 39.28  | -6.92  | FALSE | TRUE | TRUE  |
| 539 | O00303 | Eukaryotic translation initiation fact | unknown      | 13.70  | -10.87 | FALSE | TRUE | TRUE  |
| 540 | P53618 | Coatomer subunit beta                  | unknown      | 10.16  | 3.67   | FALSE | TRUE | TRUE  |
| 541 | P35610 | Sterol O-acyltransferase 1             | unknown      | 3.40   | 31.67  | FALSE | TRUE | TRUE  |
| 542 | P23921 | Ribonucleoside-diphosphate reduct      | unknown      | 11.34  | -1.77  | FALSE | TRUE | TRUE  |
| 543 | Q13823 | Nucleolar GTP-binding protein 2        | NUCLEUS      | 2.34   | -33.52 | TRUE  | TRUE | TRUE  |
| 544 | Q8IY81 | pre-rRNA processing protein FTSJ3      | NUCLEUS      | 2.90   | -34.80 | TRUE  | TRUE | TRUE  |
| 545 | P62841 | 40S ribosomal protein S15              | RIBOSOME 40S | 11.69  | -22.83 | FALSE | TRUE | FALSE |
| 546 | P31040 | Succinate dehydrogenase [ubiquino      | MITOCHONDRIA | 39.31  | -5.20  | FALSE | TRUE | TRUE  |
| 547 | P14868 | Aspartate--tRNA ligase, cytoplasmic    | unknown      | 5.99   | -3.04  | FALSE | TRUE | TRUE  |
| 548 | P52907 | F-actin-capping protein subunit alpha  | unknown      | 5.61   | 4.04   | FALSE | TRUE | TRUE  |
| 549 | P00403 | Cytochrome c oxidase subunit 2         | MITOCHONDRIA | 30.48  | -14.79 | FALSE | TRUE | TRUE  |
| 550 | Q5SRE5 | Nucleoporin NUP188 homolog             | unknown      | -6.73  | -22.42 | FALSE | TRUE | TRUE  |
| 551 | Q8N163 | Cell cycle and apoptosis regulator p   | unknown      | 24.01  | 13.55  | TRUE  | TRUE | TRUE  |
| 552 | P39656 | Dolichyl-diphosphooligosaccharide-     | ER           | 2.32   | 29.42  | FALSE | TRUE | TRUE  |
| 553 | Q6PCB5 | Round spermatid basic protein 1-lik    | NUCLEUS      | 1.80   | -32.45 | TRUE  | TRUE | TRUE  |
| 554 | P30048 | Thioredoxin-dependent peroxide re      | MITOCHONDRIA | 43.82  | -11.08 | FALSE | TRUE | TRUE  |
| 555 | P11177 | Pyruvate dehydrogenase E1 compo        | MITOCHONDRIA | 39.09  | -9.76  | FALSE | TRUE | TRUE  |
| 556 | P61160 | Actin-related protein 2                | unknown      | 1.53   | -14.36 | FALSE | TRUE | TRUE  |
| 557 | Q92616 | eIF-2-alpha kinase activator GCN1      | unknown      | -3.39  | -11.69 | FALSE | TRUE | TRUE  |
| 558 | O95573 | Long-chain-fatty-acid--CoA ligase 3    | ER           | -0.30  | 33.65  | FALSE | TRUE | TRUE  |
| 559 | O00154 | Cytosolic acyl coenzyme A thioeste     | CYTOSOL      | 17.59  | 14.77  | FALSE | TRUE | TRUE  |
| 560 | P12429 | Annexin A3                             | unknown      | 14.81  | 18.94  | FALSE | TRUE | TRUE  |
| 561 | P00492 | Hypoxanthine-guanine phosphoribo       | CYTOSOL      | 21.41  | 23.77  | FALSE | TRUE | TRUE  |
| 562 | P08758 | Annexin A5                             | unknown      | 13.52  | 18.40  | FALSE | TRUE | TRUE  |
| 563 | Q14527 | Helicase-like transcription factor     | unknown      | -21.29 | -20.60 | FALSE | TRUE | TRUE  |
| 564 | O14980 | Exportin-1                             | unknown      | 21.18  | 11.69  | FALSE | TRUE | TRUE  |
| 565 | Q13155 | Aminoacyl tRNA synthase complex        | unknown      | 5.70   | -3.26  | FALSE | TRUE | TRUE  |
| 566 | Q8TCS8 | Polyribonucleotide nucleotidyltrans    | MITOCHONDRIA | 34.82  | -11.15 | FALSE | TRUE | TRUE  |

|     |        |                                        |              |        |        |       |      |      |
|-----|--------|----------------------------------------|--------------|--------|--------|-------|------|------|
| 567 | P62316 | Small nuclear ribonucleoprotein Sm     | NUCLEUS      | 5.09   | -34.95 | FALSE | TRUE | TRUE |
| 568 | P43487 | Ran-specific GTPase-activating prot    | unknown      | 13.87  | 23.69  | FALSE | TRUE | TRUE |
| 569 | Q8N1F7 | Nuclear pore complex protein Nup9      | NUCLEUS      | -21.16 | -29.53 | FALSE | TRUE | TRUE |
| 570 | P62318 | Small nuclear ribonucleoprotein Sm     | NUCLEUS      | 5.14   | -34.70 | TRUE  | TRUE | TRUE |
| 571 | Q96DI7 | U5 small nuclear ribonucleoprotein     | NUCLEUS      | 1.29   | -37.95 | FALSE | TRUE | TRUE |
| 572 | P00441 | Superoxide dismutase [Cu-Zn]           | unknown      | 16.00  | 19.22  | FALSE | TRUE | TRUE |
| 573 | Q9P035 | Very-long-chain (3R)-3-hydroxyacy      | ER           | 1.20   | 33.84  | FALSE | TRUE | TRUE |
| 574 | P37837 | Transaldolase                          | CYTOSOL      | 16.76  | 21.49  | FALSE | TRUE | TRUE |
| 575 | P25789 | Proteasome subunit alpha type-4        | PROTEASOME   | 21.61  | 6.43   | FALSE | TRUE | TRUE |
| 576 | P16152 | Carbonyl reductase [NADPH] 1           | CYTOSOL      | 15.17  | 12.16  | FALSE | TRUE | TRUE |
| 577 | Q86VP6 | Cullin-associated NEDD8-dissociate     | unknown      | 9.97   | 1.63   | FALSE | TRUE | TRUE |
| 578 | O75436 | Vacuolar protein sorting-associated    | unknown      | -14.61 | 8.82   | FALSE | TRUE | TRUE |
| 579 | Q9NTJ3 | Structural maintenance of chromos      | unknown      | -7.69  | -9.02  | FALSE | TRUE | TRUE |
| 580 | Q13242 | Serine/arginine-rich splicing factor 9 | NUCLEUS      | -12.40 | -36.51 | FALSE | TRUE | TRUE |
| 581 | Q9Y3A5 | Ribosome maturation protein SBDS       | unknown      | -8.46  | -0.49  | FALSE | TRUE | TRUE |
| 582 | P17655 | Calpain-2 catalytic subunit            | CYTOSOL      | 19.21  | 21.49  | FALSE | TRUE | TRUE |
| 583 | Q14978 | Nucleolar and coiled-body phospho      | NUCLEUS      | -17.29 | -28.99 | TRUE  | TRUE | TRUE |
| 584 | O00231 | 26S proteasome non-ATPase regul        | PROTEASOME   | 21.24  | 6.48   | FALSE | TRUE | TRUE |
| 585 | Q9Y399 | 28S ribosomal protein S2, mitochon     | MITOCHONDRIA | 43.24  | -13.03 | FALSE | TRUE | TRUE |
| 586 | P51114 | Fragile X mental retardation syndro    | unknown      | 8.09   | -25.07 | FALSE | TRUE | TRUE |
| 587 | P61221 | ATP-binding cassette sub-family E r    | unknown      | 4.84   | -18.75 | FALSE | TRUE | TRUE |
| 588 | Q14141 | Septin-6                               | unknown      | -2.05  | 4.45   | FALSE | TRUE | TRUE |
| 589 | Q86V81 | THO complex subunit 4                  | NUCLEUS      | -3.40  | -40.14 | FALSE | TRUE | TRUE |
| 590 | P07384 | Calpain-1 catalytic subunit            | CYTOSOL      | 17.07  | 18.01  | FALSE | TRUE | TRUE |
| 591 | P36871 | Phosphoglucomutase-1                   | CYTOSOL      | 25.18  | 23.25  | FALSE | TRUE | TRUE |
| 592 | Q6UB35 | Monofunctional C1-tetrahydrofolat      | MITOCHONDRIA | 35.53  | -14.19 | FALSE | TRUE | TRUE |
| 593 | Q02241 | Kinesin-like protein KIF23             | unknown      | -13.68 | -11.12 | FALSE | TRUE | TRUE |
| 594 | Q06210 | Glutamine--fructose-6-phosphate a      | unknown      | 8.42   | -3.71  | FALSE | TRUE | TRUE |
| 595 | P30153 | Serine/threonine-protein phosphat      | unknown      | 14.14  | 12.10  | FALSE | TRUE | TRUE |
| 596 | P48047 | ATP synthase subunit O, mitochonc      | MITOCHONDRIA | 34.79  | -1.49  | FALSE | TRUE | TRUE |
| 597 | O75083 | WD repeat-containing protein 1         | unknown      | 5.31   | 9.53   | FALSE | TRUE | TRUE |
| 598 | P42167 | Lamina-associated polypeptide 2, is    | unknown      | 23.58  | -12.73 | TRUE  | TRUE | TRUE |
| 599 | Q8TCJ2 | Dolichyl-diphosphooligosaccharide-     | ER           | 3.43   | 35.58  | FALSE | TRUE | TRUE |
| 600 | P31689 | DnaJ homolog subfamily A membe         | unknown      | -4.93  | -7.47  | FALSE | TRUE | TRUE |
| 601 | P31942 | Heterogeneous nuclear ribonucleop      | NUCLEUS      | -13.58 | -36.48 | FALSE | TRUE | TRUE |
| 602 | Q8NBS9 | Thioredoxin domain-containing prot     | ER           | -1.25  | 38.95  | FALSE | TRUE | TRUE |
| 603 | Q8WY36 | HMG box transcription factor BBX       | unknown      | -23.93 | -21.73 | TRUE  | TRUE | TRUE |
| 604 | P00374 | Dihydrofolate reductase                | CYTOSOL      | 16.28  | 17.12  | FALSE | TRUE | TRUE |



|     |        |                                                    |              |        |        |       |      |       |
|-----|--------|----------------------------------------------------|--------------|--------|--------|-------|------|-------|
| 605 | O43399 | Tumor protein D54                                  | unknown      | 10.24  | 10.28  | TRUE  | TRUE | TRUE  |
| 606 | Q04446 | 1,4-alpha-glucan-branching enzyme                  | CYTOSOL      | 23.31  | 19.83  | FALSE | TRUE | TRUE  |
| 607 | P09972 | Fructose-bisphosphate aldolase C                   | unknown      | 9.38   | 4.75   | FALSE | TRUE | TRUE  |
| 608 | Q9H7B2 | Ribosome production factor 2 homolog               | NUCLEUS      | -0.15  | -35.77 | FALSE | TRUE | TRUE  |
| 609 | P61158 | Actin-related protein 3                            | unknown      | 1.65   | -14.22 | FALSE | TRUE | TRUE  |
| 610 | Q14562 | ATP-dependent RNA helicase DHX8                    | NUCLEUS      | -4.35  | -38.66 | FALSE | TRUE | TRUE  |
| 611 | P43897 | Elongation factor Ts, mitochondrial                | MITOCHONDRIA | 44.04  | -13.28 | FALSE | TRUE | TRUE  |
| 612 | P62834 | Ras-related protein Rap-1A                         | PM           | -24.96 | 15.33  | FALSE | TRUE | FALSE |
| 613 | P53992 | Protein transport protein Sec24C                   | unknown      | -10.82 | 7.52   | FALSE | TRUE | TRUE  |
| 614 | P05166 | Propionyl-CoA carboxylase beta chain               | MITOCHONDRIA | 37.35  | -9.66  | FALSE | TRUE | TRUE  |
| 615 | Q99829 | Copine-1                                           | unknown      | 11.97  | 16.57  | FALSE | TRUE | TRUE  |
| 616 | Q9BQ67 | Glutamate-rich WD repeat-containing protein        | NUCLEUS      | -10.38 | -29.83 | FALSE | TRUE | TRUE  |
| 617 | P17980 | 26S proteasome regulatory subunit alpha            | PROTEASOME   | 20.81  | 6.93   | TRUE  | TRUE | TRUE  |
| 618 | Q8WYP5 | Protein ELYS                                       | unknown      | -20.53 | -15.65 | TRUE  | TRUE | TRUE  |
| 619 | Q9NW13 | RNA-binding protein 28                             | NUCLEUS      | -1.28  | -39.78 | FALSE | TRUE | TRUE  |
| 620 | P54577 | Tyrosine--tRNA ligase, cytoplasmic                 | unknown      | 16.32  | 3.37   | FALSE | TRUE | TRUE  |
| 621 | Q99460 | 26S proteasome non-ATPase regulatory subunit 1     | PROTEASOME   | 21.40  | 6.54   | FALSE | TRUE | TRUE  |
| 622 | Q9NSD9 | Phenylalanine--tRNA ligase beta subunit            | unknown      | -2.95  | -11.71 | FALSE | TRUE | TRUE  |
| 623 | Q99613 | Eukaryotic translation initiation factor 4E        | unknown      | 13.69  | -10.96 | FALSE | TRUE | TRUE  |
| 624 | Q53H96 | Pyrroline-5-carboxylate reductase 3                | unknown      | 0.11   | -4.42  | FALSE | TRUE | TRUE  |
| 625 | P55809 | Succinyl-CoA:3-ketoacid coenzyme A ligase          | MITOCHONDRIA | 36.79  | -4.71  | FALSE | TRUE | TRUE  |
| 626 | Q9NX24 | H/ACA ribonucleoprotein complex subunit            | NUCLEUS      | -4.61  | -36.98 | FALSE | TRUE | TRUE  |
| 627 | Q13427 | Peptidyl-prolyl cis-trans isomerase (cytosolic)    | NUCLEUS      | -5.65  | -31.39 | FALSE | TRUE | TRUE  |
| 628 | P43490 | Nicotinamide phosphoribosyltransferase             | unknown      | 8.09   | -2.23  | FALSE | TRUE | TRUE  |
| 629 | Q3YEC7 | Rab-like protein 6                                 | unknown      | 15.86  | 13.67  | TRUE  | TRUE | TRUE  |
| 630 | P43034 | Platelet-activating factor acetylhydrolase         | unknown      | 9.22   | -2.29  | FALSE | TRUE | TRUE  |
| 631 | Q16531 | DNA damage-binding protein 1                       | NUCLEUS      | -15.33 | -29.11 | FALSE | TRUE | TRUE  |
| 632 | P23381 | Tryptophan--tRNA ligase, cytoplasmic               | CYTOSOL      | 21.79  | 22.36  | FALSE | TRUE | TRUE  |
| 633 | O15160 | DNA-directed RNA polymerases I and II              | NUCLEUS      | -15.83 | -28.66 | FALSE | TRUE | TRUE  |
| 634 | Q13619 | Cullin-4A                                          | NUCLEUS      | -14.64 | -28.40 | FALSE | TRUE | TRUE  |
| 635 | Q8IWS0 | PHD finger protein 6                               | unknown      | -14.76 | -20.53 | FALSE | TRUE | TRUE  |
| 636 | Q9Y4L1 | Hypoxia up-regulated protein 1                     | ER           | -1.18  | 39.27  | FALSE | TRUE | TRUE  |
| 637 | Q53GS9 | U4/U6.U5 tri-snRNP-associated protein              | NUCLEUS      | -2.57  | -31.51 | FALSE | TRUE | TRUE  |
| 638 | O43592 | Exportin-T                                         | unknown      | 19.34  | 12.54  | FALSE | TRUE | TRUE  |
| 639 | O14929 | Histone acetyltransferase type B catalytic subunit | unknown      | 27.36  | 22.83  | FALSE | TRUE | TRUE  |
| 640 | Q16851 | UTP--glucose-1-phosphate uridylyltransferase       | unknown      | 9.76   | -13.07 | FALSE | TRUE | TRUE  |
| 641 | Q9BQ52 | Zinc phosphodiesterase ELAC protein                | unknown      | 21.00  | -3.61  | FALSE | TRUE | TRUE  |
| 642 | P30040 | Endoplasmic reticulum resident protein             | ER           | -4.32  | 37.06  | FALSE | TRUE | TRUE  |

|     |        |                                                 |                   |        |        |       |      |       |
|-----|--------|-------------------------------------------------|-------------------|--------|--------|-------|------|-------|
| 643 | P63151 | Serine/threonine-protein phosphatase 1B         | unknown           | 15.88  | 6.46   | FALSE | TRUE | TRUE  |
| 644 | P63173 | 60S ribosomal protein L38                       | RIBOSOME 60S      | 15.63  | -22.97 | FALSE | TRUE | TRUE  |
| 645 | P26006 | Integrin alpha-3                                | PM                | -28.41 | 8.06   | FALSE | TRUE | TRUE  |
| 646 | O75844 | CAAX prenyl protease 1 homolog                  | unknown           | -8.08  | 29.37  | FALSE | TRUE | TRUE  |
| 647 | Q9Y678 | Coatomer subunit gamma-1                        | unknown           | 10.20  | 4.88   | FALSE | TRUE | TRUE  |
| 648 | O43172 | U4/U6 small nuclear ribonucleoproteins          | NUCLEUS           | 3.12   | -34.82 | TRUE  | TRUE | TRUE  |
| 649 | P49748 | Very long-chain specific acyl-CoA dehydrogenase | MITOCHONDRIA      | 42.52  | -11.99 | FALSE | TRUE | TRUE  |
| 650 | Q08170 | Serine/arginine-rich splicing factor 4          | unknown           | -12.09 | -31.39 | FALSE | TRUE | FALSE |
| 651 | Q13148 | TAR DNA-binding protein 43                      | NUCLEUS           | -20.21 | -32.96 | TRUE  | TRUE | TRUE  |
| 652 | Q8WUM4 | Programmed cell death 6-interacting protein     | unknown           | 9.30   | 13.60  | FALSE | TRUE | TRUE  |
| 653 | Q9UBM7 | 7-dehydrocholesterol reductase                  | ER                | -11.51 | 20.76  | FALSE | TRUE | TRUE  |
| 654 | P48444 | Coatomer subunit delta                          | unknown           | 10.22  | 3.81   | TRUE  | TRUE | TRUE  |
| 655 | Q16543 | Hsp90 co-chaperone Cdc37                        | CYTOSOL           | 18.65  | 19.16  | FALSE | TRUE | TRUE  |
| 656 | P56537 | Eukaryotic translation initiation factor 4E     | unknown           | 14.62  | -11.50 | FALSE | TRUE | TRUE  |
| 657 | P07339 | Cathepsin D                                     | LYSOSOME          | -40.54 | 8.94   | FALSE | TRUE | TRUE  |
| 658 | P42166 | Lamina-associated polypeptide 2, isoform 1      | NUCLEUS-CHROMATIN | -19.72 | -14.81 | TRUE  | TRUE | TRUE  |
| 659 | P28074 | Proteasome subunit beta type-5                  | PROTEASOME        | 22.43  | 6.36   | FALSE | TRUE | TRUE  |
| 660 | P49189 | 4-trimethylaminobutyraldehyde dehydrogenase     | unknown           | 20.27  | -3.13  | FALSE | TRUE | TRUE  |
| 661 | Q13547 | Histone deacetylase 1                           | NUCLEUS           | -25.88 | -26.91 | FALSE | TRUE | FALSE |
| 662 | Q92945 | Far upstream element-binding protein            | NUCLEUS           | -13.96 | -31.73 | TRUE  | TRUE | TRUE  |
| 663 | Q15436 | Protein transport protein Sec23A                | unknown           | -10.85 | 7.49   | FALSE | TRUE | TRUE  |
| 664 | Q99798 | Aconitate hydratase, mitochondrial              | MITOCHONDRIA      | 39.01  | -7.48  | FALSE | TRUE | TRUE  |
| 665 | O95478 | Ribosome biogenesis protein NSA2                | NUCLEUS           | 1.62   | -34.83 | FALSE | TRUE | TRUE  |
| 666 | Q07666 | KH domain-containing, RNA-binding protein       | NUCLEUS           | -10.82 | -36.47 | FALSE | TRUE | TRUE  |
| 667 | P52434 | DNA-directed RNA polymerases I, II and III      | NUCLEUS           | -15.89 | -29.45 | FALSE | TRUE | TRUE  |
| 668 | O75533 | Splicing factor 3B subunit 1                    | NUCLEUS           | 4.45   | -35.17 | TRUE  | TRUE | TRUE  |
| 669 | Q9UJS0 | Calcium-binding mitochondrial carrier           | MITOCHONDRIA      | 35.89  | -15.14 | FALSE | TRUE | TRUE  |
| 670 | O75340 | Programmed cell death protein 6                 | unknown           | 12.56  | 14.85  | FALSE | TRUE | TRUE  |
| 671 | Q02809 | Procollagen-lysine,2-oxoglutarate 5-lyase       | ER                | 4.19   | 38.91  | FALSE | TRUE | TRUE  |
| 672 | O60568 | Multifunctional procollagen lysine hydroxylase  | ER                | 4.57   | 39.08  | FALSE | TRUE | TRUE  |
| 673 | P16949 | Stathmin                                        | unknown           | 20.50  | 24.76  | TRUE  | TRUE | TRUE  |
| 674 | P07954 | Fumarate hydratase, mitochondrial               | MITOCHONDRIA      | 38.38  | -4.90  | FALSE | TRUE | TRUE  |
| 675 | Q969Z0 | FAST kinase domain-containing protein           | MITOCHONDRIA      | 39.99  | -10.24 | FALSE | TRUE | TRUE  |
| 676 | Q12792 | Twinfilin-1                                     | unknown           | 11.78  | 9.89   | TRUE  | TRUE | TRUE  |
| 677 | P11766 | Alcohol dehydrogenase class-3                   | CYTOSOL           | 25.01  | 21.94  | FALSE | TRUE | TRUE  |
| 678 | Q9H2U1 | ATP-dependent DNA/RNA helicase                  | NUCLEUS           | -0.91  | -22.78 | FALSE | TRUE | TRUE  |
| 679 | P54136 | Arginine--tRNA ligase, cytoplasmic              | unknown           | 5.71   | -3.26  | FALSE | TRUE | TRUE  |
| 680 | P19367 | Hexokinase-1                                    | unknown           | 26.64  | -13.40 | FALSE | TRUE | TRUE  |

|     |        |                                         |              |        |        |       |      |      |
|-----|--------|-----------------------------------------|--------------|--------|--------|-------|------|------|
| 681 | P11166 | Solute carrier family 2, facilitated gl | PM           | -21.78 | 11.34  | FALSE | TRUE | TRUE |
| 682 | O60231 | Pre-mRNA-splicing factor ATP-depe       | NUCLEUS      | -1.83  | -24.50 | FALSE | TRUE | TRUE |
| 683 | Q12873 | Chromodomain-helicase-DNA-bind          | NUCLEUS      | -23.86 | -24.75 | FALSE | TRUE | TRUE |
| 684 | Q9Y262 | Eukaryotic translation initiation fact  | unknown      | 13.67  | -10.95 | FALSE | TRUE | TRUE |
| 685 | O00116 | Alkyldihydroxyacetonephosphate s        | PEROXISOME   | 52.45  | -3.44  | FALSE | TRUE | TRUE |
| 686 | Q15691 | Microtubule-associated protein RP/      | unknown      | 2.23   | -2.33  | TRUE  | TRUE | TRUE |
| 687 | P28340 | DNA polymerase delta catalytic sub      | unknown      | 15.86  | 2.94   | FALSE | TRUE | TRUE |
| 688 | O15260 | Surfeit locus protein 4                 | unknown      | -6.46  | 32.15  | FALSE | TRUE | TRUE |
| 689 | P30405 | Peptidyl-prolyl cis-trans isomerase I   | MITOCHONDRIA | 41.08  | -4.24  | FALSE | TRUE | TRUE |
| 690 | P21980 | Protein-glutamine gamma-glutamy         | unknown      | 12.78  | 7.67   | FALSE | TRUE | TRUE |
| 691 | Q15424 | Scaffold attachment factor B1           | NUCLEUS      | 2.07   | -38.35 | TRUE  | TRUE | TRUE |
| 692 | Q14166 | Tubulin--tyrosine ligase-like protein   | CYTOSOL      | 18.40  | 17.43  | TRUE  | TRUE | TRUE |
| 693 | O75347 | Tubulin-specific chaperone A            | unknown      | 14.90  | 16.83  | FALSE | TRUE | TRUE |
| 694 | Q8TA86 | Retinitis pigmentosa 9 protein          | unknown      | 6.98   | -10.84 | TRUE  | TRUE | TRUE |
| 695 | Q9H6R4 | Nucleolar protein 6                     | NUCLEUS      | -1.08  | -40.51 | TRUE  | TRUE | TRUE |
| 696 | Q7L0Y3 | tRNA methyltransferase 10 homolo        | MITOCHONDRIA | 42.63  | -8.43  | FALSE | TRUE | TRUE |
| 697 | P12277 | Creatine kinase B-type                  | CYTOSOL      | 22.42  | 23.13  | FALSE | TRUE | TRUE |
| 698 | P46013 | Proliferation marker protein Ki-67      | unknown      | -21.92 | -12.83 | TRUE  | TRUE | TRUE |
| 699 | Q9H4A4 | Aminopeptidase B                        | unknown      | 24.07  | 23.54  | FALSE | TRUE | TRUE |
| 700 | P30876 | DNA-directed RNA polymerase II su       | NUCLEUS      | -15.61 | -29.04 | FALSE | TRUE | TRUE |
| 701 | Q9BR76 | Coronin-1B                              | unknown      | 5.76   | 7.43   | FALSE | TRUE | TRUE |
| 702 | P60228 | Eukaryotic translation initiation fact  | unknown      | 13.66  | -10.91 | FALSE | TRUE | TRUE |
| 703 | P35606 | Coatomer subunit beta'                  | unknown      | 10.00  | 5.09   | FALSE | TRUE | TRUE |
| 704 | Q13404 | Ubiquitin-conjugating enzyme E2 v       | unknown      | 16.81  | 15.90  | FALSE | TRUE | TRUE |
| 705 | P40763 | Signal transducer and activator of t    | NUCLEUS      | 1.88   | -2.89  | TRUE  | TRUE | TRUE |
| 706 | P99999 | Cytochrome c                            | unknown      | 27.22  | -13.03 | FALSE | TRUE | TRUE |
| 707 | P53597 | Succinate--CoA ligase [ADP/GDP-fo       | MITOCHONDRIA | 40.80  | -5.43  | FALSE | TRUE | TRUE |
| 708 | P39748 | Flap endonuclease 1                     | unknown      | -20.95 | -21.50 | TRUE  | TRUE | TRUE |
| 709 | P62195 | 26S proteasome regulatory subunit       | PROTEASOME   | 20.40  | 6.06   | TRUE  | TRUE | TRUE |
| 710 | Q9HD20 | Manganese-transporting ATPase 1         | unknown      | 3.66   | 34.87  | FALSE | TRUE | TRUE |
| 711 | Q9NTK5 | Obg-like ATPase 1                       | CYTOSOL      | 23.03  | 21.49  | FALSE | TRUE | TRUE |
| 712 | Q13724 | Mannosyl-oligosaccharide glucosid       | ER           | 4.58   | 36.42  | FALSE | TRUE | TRUE |
| 713 | P30084 | Enoyl-CoA hydratase, mitochondria       | MITOCHONDRIA | 37.43  | -9.69  | FALSE | TRUE | TRUE |
| 714 | P61088 | Ubiquitin-conjugating enzyme E2 N       | CYTOSOL      | 19.94  | 19.44  | FALSE | TRUE | TRUE |
| 715 | P13804 | Electron transfer flavoprotein subur    | MITOCHONDRIA | 39.29  | -9.73  | FALSE | TRUE | TRUE |
| 716 | Q4G0J3 | La-related protein 7                    | NUCLEUS      | 0.36   | -26.70 | FALSE | TRUE | TRUE |
| 717 | P27816 | Microtubule-associated protein 4        | unknown      | -1.56  | -12.91 | TRUE  | TRUE | TRUE |
| 718 | P27816 | Microtubule-associated protein 4        | unknown      | -7.85  | -9.43  | TRUE  | TRUE | TRUE |

|     |        |                                             |                   |        |        |       |       |       |
|-----|--------|---------------------------------------------|-------------------|--------|--------|-------|-------|-------|
| 719 | O43491 | Band 4.1-like protein 2                     | unknown           | -27.66 | -0.03  | TRUE  | TRUE  | TRUE  |
| 720 | O43491 | Band 4.1-like protein 2                     | unknown           | -27.53 | 1.57   | TRUE  | TRUE  | TRUE  |
| 721 | P24941 | Cyclin-dependent kinase 2                   | NUCLEUS           | -4.37  | -9.78  | FALSE | TRUE  | TRUE  |
| 722 | P40121 | Macrophage-capping protein                  | CYTOSOL           | 19.52  | 21.63  | FALSE | TRUE  | TRUE  |
| 723 | P61289 | Proteasome activator complex subunit        | unknown           | 27.62  | 22.44  | TRUE  | TRUE  | TRUE  |
| 724 | O15213 | WD repeat-containing protein 46             | NUCLEUS           | -1.94  | -40.85 | FALSE | TRUE  | TRUE  |
| 725 | Q9P275 | Ubiquitin carboxyl-terminal hydrolase       | NUCLEUS           | -0.39  | -35.91 | TRUE  | TRUE  | TRUE  |
| 726 | Q9NS69 | Mitochondrial import receptor subunit       | MITOCHONDRIA      | 32.22  | -15.60 | FALSE | TRUE  | TRUE  |
| 727 | Q14137 | Ribosome biogenesis protein BOP1            | NUCLEUS           | -1.61  | -38.01 | FALSE | TRUE  | TRUE  |
| 728 | Q8WWQ0 | PH-interacting protein                      | unknown           | -21.69 | -13.63 | TRUE  | TRUE  | TRUE  |
| 729 | P63010 | AP-2 complex subunit beta                   | unknown           | -10.30 | 6.46   | FALSE | TRUE  | TRUE  |
| 730 | Q9NQR4 | Omega-amidase NIT2                          | unknown           | 9.70   | 8.99   | FALSE | TRUE  | TRUE  |
| 731 | Q14444 | Caprin-1                                    | RIBOSOME 40S      | 8.23   | -23.15 | TRUE  | TRUE  | TRUE  |
| 732 | P42765 | 3-ketoacyl-CoA thiolase, mitochondrial      | MITOCHONDRIA      | 39.41  | -7.52  | FALSE | TRUE  | TRUE  |
| 733 | P54709 | Sodium/potassium-transporting ATPase        | unknown           | -21.19 | 19.64  | FALSE | TRUE  | FALSE |
| 734 | Q9NWT1 | p21-activated protein kinase-interacting    | NUCLEUS           | -0.66  | -37.39 | FALSE | TRUE  | TRUE  |
| 735 | Q96AC1 | Fermitin family homolog 2                   | unknown           | -13.76 | 14.47  | TRUE  | TRUE  | TRUE  |
| 736 | O00541 | Pescadillo homolog                          | NUCLEUS           | 2.22   | -36.66 | TRUE  | TRUE  | TRUE  |
| 737 | P41227 | N-alpha-acetyltransferase 10                | unknown           | 10.04  | -13.02 | FALSE | TRUE  | TRUE  |
| 738 | Q02218 | 2-oxoglutarate dehydrogenase, mitochondrial | MITOCHONDRIA      | 39.34  | -7.23  | FALSE | TRUE  | TRUE  |
| 739 | P62191 | 26S proteasome regulatory subunit           | PROTEASOME        | 21.12  | 6.43   | FALSE | TRUE  | TRUE  |
| 740 | Q96KR1 | Zinc finger RNA-binding protein             | NUCLEUS           | -11.33 | -35.88 | TRUE  | TRUE  | TRUE  |
| 741 | Q9UK76 | Jupiter microtubule associated homology     | unknown           | 10.01  | 21.20  | TRUE  | TRUE  | TRUE  |
| 742 | Q14151 | Scaffold attachment factor B2               | NUCLEUS           | 1.94   | -38.58 | TRUE  | TRUE  | TRUE  |
| 743 | P83881 | 60S ribosomal protein L36a                  | RIBOSOME 60S      | 16.37  | -22.48 | TRUE  | FALSE | TRUE  |
| 744 | P23588 | Eukaryotic translation initiation factor    | unknown           | 12.31  | -2.84  | TRUE  | TRUE  | TRUE  |
| 745 | Q9H3K6 | BolA-like protein 2                         | unknown           | 19.65  | 21.72  | FALSE | TRUE  | TRUE  |
| 746 | Q1KMD3 | Heterogeneous nuclear ribonucleoprotein     | NUCLEUS           | -13.31 | -30.51 | FALSE | TRUE  | TRUE  |
| 747 | P49792 | E3 SUMO-protein ligase RanBP2               | unknown           | -6.93  | -23.19 | TRUE  | TRUE  | TRUE  |
| 748 | Q9UKV8 | Protein argonaute-2                         | unknown           | 6.95   | -23.07 | FALSE | TRUE  | TRUE  |
| 749 | A1L0T0 | Acetolactate synthase-like protein          | unknown           | -7.60  | 30.90  | FALSE | TRUE  | TRUE  |
| 750 | P37108 | Signal recognition particle 14 kDa p        | NUCLEUS           | 9.16   | -6.76  | TRUE  | TRUE  | TRUE  |
| 751 | P24752 | Acetyl-CoA acetyltransferase, mitochondrial | MITOCHONDRIA      | 43.29  | -8.29  | FALSE | TRUE  | TRUE  |
| 752 | P28072 | Proteasome subunit beta type-6              | PROTEASOME        | 22.72  | 6.31   | FALSE | TRUE  | TRUE  |
| 753 | P30085 | UMP-CMP kinase                              | CYTOSOL           | 20.17  | 21.01  | FALSE | TRUE  | TRUE  |
| 754 | Q9Y5M8 | Signal recognition particle receptor        | ER                | 3.17   | 35.09  | FALSE | TRUE  | TRUE  |
| 755 | Q9UQE7 | Structural maintenance of chromosomes       | NUCLEUS-CHROMATIN | -18.13 | -15.95 | FALSE | TRUE  | TRUE  |
| 756 | Q13177 | Serine/threonine-protein kinase PA          | unknown           | 15.96  | 10.40  | TRUE  | TRUE  | TRUE  |

|     |        |                                                       |              |        |        |       |       |       |
|-----|--------|-------------------------------------------------------|--------------|--------|--------|-------|-------|-------|
| 757 | P60981 | Destrin                                               | unknown      | 4.14   | 9.37   | FALSE | TRUE  | TRUE  |
| 758 | Q99805 | Transmembrane 9 superfamily member                    | unknown      | -22.33 | 30.18  | FALSE | TRUE  | TRUE  |
| 759 | Q96SB4 | SRSF protein kinase 1                                 | unknown      | 6.52   | -24.49 | FALSE | TRUE  | TRUE  |
| 760 | P68032 | Actin, alpha cardiac muscle 1                         | unknown      | 5.36   | 7.81   | FALSE | FALSE | TRUE  |
| 761 | Q8IWA0 | WD repeat-containing protein 75                       | NUCLEUS      | -2.57  | -40.99 | FALSE | TRUE  | TRUE  |
| 762 | P51610 | Host cell factor 1                                    | NUCLEUS      | -14.15 | -22.44 | TRUE  | TRUE  | TRUE  |
| 763 | Q92900 | Regulator of nonsense transcripts 1                   | NUCLEUS      | -2.07  | -14.06 | FALSE | TRUE  | TRUE  |
| 764 | O95340 | Bifunctional 3'-phosphoadenosine 5'                   | unknown      | 8.48   | -3.98  | FALSE | TRUE  | TRUE  |
| 765 | O14737 | Programmed cell death protein 5                       | CYTOSOL      | 22.67  | 23.31  | FALSE | TRUE  | TRUE  |
| 766 | Q9BUN8 | Derlin-1                                              | unknown      | -10.73 | 27.71  | FALSE | TRUE  | TRUE  |
| 767 | P61081 | NEDD8-conjugating enzyme Ubc12                        | CYTOSOL      | 15.51  | 23.01  | TRUE  | TRUE  | TRUE  |
| 768 | Q9NZJ7 | Mitochondrial carrier homolog 1                       | MITOCHONDRIA | 29.40  | -10.12 | FALSE | TRUE  | TRUE  |
| 769 | P11279 | Lysosome-associated membrane glycoprotein 1           | LYSOSOME     | -39.03 | 8.59   | FALSE | TRUE  | TRUE  |
| 770 | P55769 | NHP2-like protein 1                                   | NUCLEUS      | -3.56  | -40.70 | FALSE | TRUE  | TRUE  |
| 771 | Q15758 | Neutral amino acid transporter B(0)AT1                | PM           | -24.23 | 10.31  | TRUE  | TRUE  | TRUE  |
| 772 | P06737 | Glycogen phosphorylase, liver form                    | unknown      | 18.18  | 18.25  | FALSE | TRUE  | FALSE |
| 773 | P45974 | Ubiquitin carboxyl-terminal hydrolase 1               | CYTOSOL      | 23.65  | 20.42  | FALSE | TRUE  | TRUE  |
| 774 | P41567 | Eukaryotic translation initiation factor 4E           | NUCLEUS      | -3.61  | -16.51 | FALSE | TRUE  | FALSE |
| 775 | P25788 | Proteasome subunit alpha type-3                       | PROTEASOME   | 22.48  | 6.56   | FALSE | TRUE  | TRUE  |
| 776 | Q14258 | E3 ubiquitin/ISG15 ligase TRIM25                      | unknown      | 8.15   | -20.79 | TRUE  | TRUE  | TRUE  |
| 777 | Q8TEQ6 | Gem-associated protein 5                              | unknown      | 13.45  | 0.86   | TRUE  | TRUE  | TRUE  |
| 778 | Q3ZCQ8 | Mitochondrial import inner membrane                   | MITOCHONDRIA | 35.43  | -9.00  | FALSE | TRUE  | TRUE  |
| 779 | Q93009 | Ubiquitin carboxyl-terminal hydrolase 1               | unknown      | 12.25  | 3.45   | FALSE | TRUE  | TRUE  |
| 780 | P25786 | Proteasome subunit alpha type-1                       | PROTEASOME   | 22.61  | 5.88   | FALSE | TRUE  | TRUE  |
| 781 | Q8N3C0 | Activating signal cointegrator 1 core                 | unknown      | 1.23   | -15.60 | FALSE | TRUE  | TRUE  |
| 782 | P84095 | Rho-related GTP-binding protein RhoA                  | PM           | -22.68 | 10.59  | FALSE | TRUE  | TRUE  |
| 783 | P48729 | Casein kinase I isoform alpha                         | unknown      | 1.97   | -10.93 | TRUE  | TRUE  | TRUE  |
| 784 | Q5JTH9 | RRP12-like protein                                    | NUCLEUS      | -0.81  | -40.23 | FALSE | TRUE  | TRUE  |
| 785 | O00487 | 26S proteasome non-ATPase regulatory subunit 1        | PROTEASOME   | 20.28  | 6.71   | FALSE | TRUE  | TRUE  |
| 786 | Q8NI27 | THO complex subunit 2                                 | unknown      | -10.98 | -22.75 | TRUE  | TRUE  | TRUE  |
| 787 | P09622 | Dihydrolipoyl dehydrogenase, mitochondrial            | MITOCHONDRIA | 39.74  | -7.37  | FALSE | TRUE  | TRUE  |
| 788 | P46060 | Ran GTPase-activating protein 1                       | NUCLEUS      | -19.36 | -29.76 | TRUE  | TRUE  | TRUE  |
| 789 | P15559 | NAD(P)H dehydrogenase [quinone]                       | unknown      | 17.47  | 7.31   | FALSE | TRUE  | FALSE |
| 790 | P28288 | ATP-binding cassette sub-family D member 1            | PEROXISOME   | 52.56  | -3.19  | FALSE | TRUE  | TRUE  |
| 791 | Q9BYG3 | MKI67 FHA domain-interacting nuclear protein          | NUCLEUS      | 0.92   | -36.78 | TRUE  | TRUE  | TRUE  |
| 792 | O00264 | Membrane-associated progesterone receptor component 1 | ER           | -11.05 | 27.95  | FALSE | TRUE  | TRUE  |
| 793 | Q9NUU7 | ATP-dependent RNA helicase DDX1                       | unknown      | 11.75  | 0.38   | FALSE | TRUE  | TRUE  |
| 794 | O60664 | Perilipin-3                                           | CYTOSOL      | 18.65  | 15.87  | TRUE  | TRUE  | TRUE  |

|     |        |                                               |              |        |        |       |      |       |
|-----|--------|-----------------------------------------------|--------------|--------|--------|-------|------|-------|
| 795 | P47813 | Eukaryotic translation initiation factor 1    | unknown      | 13.71  | -11.07 | FALSE | TRUE | TRUE  |
| 796 | Q9BSC4 | Nucleolar protein 10                          | NUCLEUS      | 0.47   | -39.29 | FALSE | TRUE | TRUE  |
| 797 | P54819 | Adenylate kinase 2, mitochondrial             | MITOCHONDRIA | 38.77  | -5.66  | FALSE | TRUE | TRUE  |
| 798 | Q8TAT6 | Nuclear protein localization protein 1        | NUCLEUS      | -3.39  | -9.78  | FALSE | TRUE | TRUE  |
| 799 | Q92804 | TATA-binding protein-associated factor 1      | NUCLEUS      | -9.00  | -35.87 | TRUE  | TRUE | TRUE  |
| 800 | Q15437 | Protein transport protein Sec23B              | unknown      | 4.96   | -9.98  | FALSE | TRUE | TRUE  |
| 801 | Q13423 | NAD(P) transhydrogenase, mitochondrial        | MITOCHONDRIA | 36.22  | -8.75  | FALSE | TRUE | TRUE  |
| 802 | Q6DKI1 | 60S ribosomal protein L7-like 1               | NUCLEUS      | -0.39  | -37.37 | FALSE | TRUE | FALSE |
| 803 | P42696 | RNA-binding protein 34                        | NUCLEUS      | -0.93  | -35.29 | FALSE | TRUE | TRUE  |
| 804 | Q9NV06 | DDB1- and CUL4-associated factor 1            | NUCLEUS      | -1.74  | -38.03 | FALSE | TRUE | TRUE  |
| 805 | P08240 | Signal recognition particle receptor          | ER           | 3.51   | 36.60  | TRUE  | TRUE | TRUE  |
| 806 | Q15269 | Periodic tryptophan protein 2 homolog         | NUCLEUS      | -2.76  | -39.98 | FALSE | TRUE | TRUE  |
| 807 | Q96PZ0 | Pseudouridylate synthase 7 homolog            | unknown      | 15.74  | 13.36  | FALSE | TRUE | TRUE  |
| 808 | P51532 | Transcription activator BRG1                  | unknown      | -25.74 | -23.52 | TRUE  | TRUE | TRUE  |
| 809 | P49257 | Protein ERGIC-53                              | unknown      | -10.65 | 29.16  | FALSE | TRUE | TRUE  |
| 810 | Q9Y6M5 | Zinc transporter 1                            | PM           | -25.15 | 14.56  | TRUE  | TRUE | TRUE  |
| 811 | Q9UM00 | Calcium load-activated calcium channel        | ER           | 3.02   | 36.16  | FALSE | TRUE | TRUE  |
| 812 | P21281 | V-type proton ATPase subunit B, brain         | unknown      | -30.59 | 3.27   | FALSE | TRUE | TRUE  |
| 813 | Q5T4S7 | E3 ubiquitin-protein ligase UBR4              | unknown      | 10.67  | 2.85   | FALSE | TRUE | TRUE  |
| 814 | O43615 | Mitochondrial import inner membrane           | MITOCHONDRIA | 39.97  | -8.96  | FALSE | TRUE | TRUE  |
| 815 | P49591 | Serine--tRNA ligase, cytoplasmic              | CYTOSOL      | 21.85  | 18.79  | TRUE  | TRUE | TRUE  |
| 816 | O95782 | AP-2 complex subunit alpha-1                  | unknown      | -10.31 | 6.46   | FALSE | TRUE | TRUE  |
| 817 | Q9UHD1 | Cysteine and histidine-rich domain-containing | CYTOSOL      | 21.98  | 18.14  | FALSE | TRUE | TRUE  |
| 818 | P62333 | 26S proteasome regulatory subunit             | PROTEASOME   | 20.19  | 6.80   | FALSE | TRUE | TRUE  |
| 819 | Q9Y2T2 | AP-3 complex subunit mu-1                     | unknown      | -14.26 | 4.08   | FALSE | TRUE | TRUE  |
| 820 | Q13620 | Cullin-4B                                     | NUCLEUS      | -15.44 | -29.19 | FALSE | TRUE | TRUE  |
| 821 | P62304 | Small nuclear ribonucleoprotein E             | NUCLEUS      | 5.31   | -35.80 | TRUE  | TRUE | TRUE  |
| 822 | Q9GZZ1 | N-alpha-acetyltransferase 50                  | unknown      | 9.31   | -13.26 | FALSE | TRUE | TRUE  |
| 823 | O75439 | Mitochondrial-processing peptidase            | MITOCHONDRIA | 40.85  | -10.39 | FALSE | TRUE | TRUE  |
| 824 | Q7L2H7 | Eukaryotic translation initiation factor      | unknown      | 13.18  | -10.93 | FALSE | TRUE | TRUE  |
| 825 | P48147 | Prolyl endopeptidase                          | unknown      | 24.79  | 22.67  | FALSE | TRUE | TRUE  |
| 826 | Q15003 | Condensin complex subunit 2                   | unknown      | -7.95  | -9.04  | TRUE  | TRUE | TRUE  |
| 827 | Q9BZE1 | 39S ribosomal protein L37, mitochondrial      | MITOCHONDRIA | 42.97  | -12.90 | FALSE | TRUE | TRUE  |
| 828 | P55735 | Protein SEC13 homolog                         | NUCLEUS      | 9.10   | -6.87  | FALSE | TRUE | TRUE  |
| 829 | Q8TEM1 | Nuclear pore membrane glycoprotein            | unknown      | 24.05  | -11.48 | FALSE | TRUE | TRUE  |
| 830 | Q9HCC0 | Methylcrotonoyl-CoA carboxylase beta          | MITOCHONDRIA | 36.77  | -4.39  | FALSE | TRUE | TRUE  |
| 831 | P05455 | Lupus La protein                              | unknown      | 27.29  | 22.99  | TRUE  | TRUE | TRUE  |
| 832 | Q2TAY7 | WD40 repeat-containing protein SM             | NUCLEUS      | -3.99  | -38.39 | FALSE | TRUE | TRUE  |

|     |        |                                                       |              |        |        |       |      |       |
|-----|--------|-------------------------------------------------------|--------------|--------|--------|-------|------|-------|
| 833 | Q66PJ3 | ADP-ribosylation factor-like protein                  | unknown      | 18.15  | -19.49 | FALSE | TRUE | TRUE  |
| 834 | Q66PJ3 | ADP-ribosylation factor-like protein                  | unknown      | 18.13  | -19.52 | FALSE | TRUE | TRUE  |
| 835 | Q9UKD2 | mRNA turnover protein 4 homolog                       | NUCLEUS      | 3.63   | -29.02 | FALSE | TRUE | TRUE  |
| 836 | P46926 | Glucosamine-6-phosphate isomerase                     | unknown      | 23.95  | 19.73  | FALSE | TRUE | TRUE  |
| 837 | P45973 | Chromobox protein homolog 5                           | unknown      | -20.13 | -18.08 | TRUE  | TRUE | TRUE  |
| 838 | O15446 | DNA-directed RNA polymerase I subunit                 | NUCLEUS      | -24.69 | -25.76 | FALSE | TRUE | TRUE  |
| 839 | Q9H6S0 | 3'-5' RNA helicase YTHDC2                             | unknown      | 1.67   | -15.75 | FALSE | TRUE | TRUE  |
| 840 | P78406 | mRNA export factor                                    | NUCLEUS      | -4.91  | -30.97 | FALSE | TRUE | TRUE  |
| 841 | Q9BQA1 | Methylosome protein 50                                | unknown      | 11.24  | 18.90  | FALSE | TRUE | TRUE  |
| 842 | Q16836 | Hydroxyacyl-coenzyme A dehydrogenase                  | MITOCHONDRIA | 43.55  | -6.65  | FALSE | TRUE | TRUE  |
| 843 | P61077 | Ubiquitin-conjugating enzyme E2 D1                    | unknown      | 14.33  | 11.45  | FALSE | TRUE | FALSE |
| 844 | Q12904 | Aminoacyl tRNA synthetase complex                     | unknown      | 5.60   | -3.32  | FALSE | TRUE | TRUE  |
| 845 | P32322 | Pyrroline-5-carboxylate reductase 1                   | MITOCHONDRIA | 35.40  | -14.27 | FALSE | TRUE | TRUE  |
| 846 | Q9BRJ6 | Uncharacterized protein C7orf50                       | unknown      | 5.92   | -26.28 | FALSE | TRUE | TRUE  |
| 847 | P51665 | 26S proteasome non-ATPase regulatory subunit 1        | PROTEASOME   | 18.87  | 5.15   | FALSE | TRUE | TRUE  |
| 848 | P12081 | Histidine--tRNA ligase, cytoplasmic                   | unknown      | 13.51  | -1.86  | FALSE | TRUE | TRUE  |
| 849 | O43852 | Calumenin                                             | unknown      | -1.11  | 40.52  | FALSE | TRUE | TRUE  |
| 850 | O43852 | Calumenin                                             | unknown      | -0.73  | 40.81  | FALSE | TRUE | TRUE  |
| 851 | P31350 | Ribonucleoside-diphosphate reductase                  | unknown      | 16.26  | 16.13  | FALSE | TRUE | TRUE  |
| 852 | Q04760 | Lactoylglutathione lyase                              | CYTOSOL      | 23.48  | 24.51  | TRUE  | TRUE | TRUE  |
| 853 | O94906 | Pre-mRNA-processing factor 6                          | NUCLEUS      | 2.84   | -35.33 | FALSE | TRUE | TRUE  |
| 854 | Q15392 | Delta(24)-sterol reductase                            | unknown      | -5.11  | 33.36  | FALSE | TRUE | TRUE  |
| 855 | Q03701 | CCAAT/enhancer-binding protein zeta                   | NUCLEUS      | 0.13   | -39.77 | TRUE  | TRUE | TRUE  |
| 856 | Q9Y295 | Developmentally-regulated GTP-binding protein         | unknown      | 3.90   | -17.45 | FALSE | TRUE | TRUE  |
| 857 | Q9UIF9 | Bromodomain adjacent to zinc finger domain 1          | unknown      | -20.96 | -19.19 | TRUE  | TRUE | TRUE  |
| 858 | Q8N1G2 | Cap-specific mRNA (nucleoside-2'-C-methyltransferase) | NUCLEUS      | -0.37  | -24.12 | FALSE | TRUE | TRUE  |
| 859 | Q9NZ45 | CDGSH iron-sulfur domain-containing protein           | unknown      | 36.43  | -1.83  | FALSE | TRUE | TRUE  |
| 860 | Q9H2U2 | Inorganic pyrophosphatase 2, mitochondrial            | unknown      | 45.16  | -5.87  | FALSE | TRUE | TRUE  |
| 861 | O00232 | 26S proteasome non-ATPase regulatory subunit 1        | PROTEASOME   | 20.61  | 5.79   | FALSE | TRUE | TRUE  |
| 862 | P29144 | Tripeptidyl-peptidase 2                               | unknown      | 13.30  | -6.46  | FALSE | TRUE | TRUE  |
| 863 | Q10713 | Mitochondrial-processing peptidase                    | MITOCHONDRIA | 39.25  | -8.85  | FALSE | TRUE | TRUE  |
| 864 | P09661 | U2 small nuclear ribonucleoprotein                    | NUCLEUS      | 3.83   | -35.99 | FALSE | TRUE | TRUE  |
| 865 | O60493 | Sorting nexin-3                                       | unknown      | -10.84 | 16.69  | TRUE  | TRUE | TRUE  |
| 866 | Q15293 | Reticulocalbin-1                                      | ER           | -1.97  | 38.79  | FALSE | TRUE | TRUE  |
| 867 | Q96KP4 | Cytosolic non-specific dipeptidase                    | CYTOSOL      | 21.71  | 23.76  | FALSE | TRUE | TRUE  |
| 868 | P54578 | Ubiquitin carboxyl-terminal hydrolase                 | unknown      | 23.37  | 21.90  | FALSE | TRUE | TRUE  |
| 869 | P04818 | Thymidylate synthase                                  | unknown      | 7.85   | -6.36  | FALSE | TRUE | TRUE  |
| 870 | Q9UKK9 | ADP-sugar pyrophosphatase                             | CYTOSOL      | 23.72  | 19.99  | TRUE  | TRUE | TRUE  |

|     |        |                                     |              |        |        |       |      |       |
|-----|--------|-------------------------------------|--------------|--------|--------|-------|------|-------|
| 871 | Q5VTL8 | Pre-mRNA-splicing factor 38B        | NUCLEUS      | 1.46   | -30.25 | FALSE | TRUE | TRUE  |
| 872 | Q9UN86 | Ras GTPase-activating protein-bind  | unknown      | 9.38   | -20.82 | TRUE  | TRUE | TRUE  |
| 873 | P30419 | Glycylpeptide N-tetradecanoyltrans  | unknown      | 7.03   | -23.55 | TRUE  | TRUE | TRUE  |
| 874 | Q00534 | Cyclin-dependent kinase 6           | unknown      | 19.09  | 13.54  | FALSE | TRUE | TRUE  |
| 875 | Q15008 | 26S proteasome non-ATPase reguli    | PROTEASOME   | 21.01  | 6.30   | FALSE | TRUE | TRUE  |
| 876 | Q16630 | Cleavage and polyadenylation spec   | NUCLEUS      | 4.93   | -32.64 | FALSE | TRUE | TRUE  |
| 877 | Q96EE3 | Nucleoporin SEH1                    | NUCLEUS      | -5.46  | -24.34 | FALSE | TRUE | TRUE  |
| 878 | Q86X55 | Histone-arginine methyltransferase  | unknown      | 19.57  | 12.44  | FALSE | TRUE | TRUE  |
| 879 | Q9P265 | Disco-interacting protein 2 homolog | unknown      | -8.71  | 4.50   | TRUE  | TRUE | TRUE  |
| 880 | Q4G0N4 | NAD kinase 2, mitochondrial         | MITOCHONDRIA | 33.96  | -6.18  | FALSE | TRUE | TRUE  |
| 881 | P42285 | Exosome RNA helicase MTR4           | NUCLEUS      | -11.16 | -26.18 | FALSE | TRUE | TRUE  |
| 882 | Q07065 | Cytoskeleton-associated protein 4   | unknown      | 5.12   | 38.50  | TRUE  | TRUE | TRUE  |
| 883 | P53582 | Methionine aminopeptidase 1         | unknown      | -9.27  | -20.91 | FALSE | TRUE | TRUE  |
| 884 | Q9BVK6 | Transmembrane emp24 domain-cc       | unknown      | -10.06 | 32.53  | FALSE | TRUE | TRUE  |
| 885 | Q15363 | Transmembrane emp24 domain-cc       | unknown      | -3.85  | 31.62  | FALSE | TRUE | TRUE  |
| 886 | P28070 | Proteasome subunit beta type-4      | PROTEASOME   | 22.54  | 6.54   | FALSE | TRUE | TRUE  |
| 887 | Q9Y305 | Acyl-coenzyme A thioesterase 9, m   | MITOCHONDRIA | 36.45  | -10.64 | FALSE | TRUE | TRUE  |
| 888 | Q96FW1 | Ubiquitin thioesterase OTUB1        | unknown      | 25.38  | 21.84  | FALSE | TRUE | TRUE  |
| 889 | P20020 | Plasma membrane calcium-transpc     | PM           | -24.76 | 8.89   | TRUE  | TRUE | TRUE  |
| 890 | Q9BXS5 | AP-1 complex subunit mu-1           | unknown      | -33.33 | 19.56  | FALSE | TRUE | FALSE |
| 891 | Q9UBF2 | Coatomer subunit gamma-2            | unknown      | 6.04   | 4.28   | FALSE | TRUE | TRUE  |
| 892 | Q9Y2Z9 | Ubiquinone biosynthesis monooxyg    | MITOCHONDRIA | 43.34  | -11.49 | FALSE | TRUE | FALSE |
| 893 | Q9NPE3 | H/ACA ribonucleoprotein complex s   | NUCLEUS      | -5.49  | -37.14 | FALSE | TRUE | FALSE |
| 894 | Q9Y5A9 | YTH domain-containing family prot   | unknown      | 5.92   | -23.67 | FALSE | TRUE | TRUE  |
| 895 | P13073 | Cytochrome c oxidase subunit 4 iso  | MITOCHONDRIA | 31.48  | -14.92 | FALSE | TRUE | TRUE  |
| 896 | P78347 | General transcription factor II-I   | NUCLEUS      | -24.21 | -22.79 | TRUE  | TRUE | TRUE  |
| 897 | P25787 | Proteasome subunit alpha type-2     | PROTEASOME   | 21.78  | 6.10   | FALSE | TRUE | TRUE  |
| 898 | Q86UP2 | Kinectin                            | ER           | 0.85   | 37.47  | FALSE | TRUE | TRUE  |
| 899 | P19525 | Interferon-induced, double-strande  | unknown      | 6.95   | -19.98 | FALSE | TRUE | TRUE  |
| 900 | P47755 | F-actin-capping protein subunit alp | unknown      | 6.17   | 4.83   | FALSE | TRUE | TRUE  |
| 901 | Q6DD88 | Atlastin-3                          | unknown      | -9.87  | 32.75  | FALSE | TRUE | TRUE  |
| 902 | P82675 | 28S ribosomal protein S5, mitochon  | MITOCHONDRIA | 41.62  | -12.74 | FALSE | TRUE | TRUE  |
| 903 | O60884 | DnaJ homolog subfamily A membe      | unknown      | -4.77  | -7.34  | TRUE  | TRUE | TRUE  |
| 904 | Q9UNQ2 | Probable dimethyladenosine transf   | NUCLEUS      | 3.84   | -28.64 | FALSE | TRUE | TRUE  |
| 905 | Q14157 | Ubiquitin-associated protein 2-like | unknown      | 8.47   | -25.74 | TRUE  | TRUE | TRUE  |
| 906 | P63208 | S-phase kinase-associated protein   | unknown      | 12.01  | 1.48   | FALSE | TRUE | TRUE  |
| 907 | O15226 | NF-kappa-B-repressing factor        | NUCLEUS      | 1.14   | -34.93 | FALSE | TRUE | TRUE  |
| 908 | Q969X6 | U3 small nucleolar RNA-associated   | NUCLEUS      | -2.52  | -41.39 | FALSE | TRUE | TRUE  |



|     |        |                                      |                   |        |        |       |       |      |
|-----|--------|--------------------------------------|-------------------|--------|--------|-------|-------|------|
| 909 | Q15738 | Sterol-4-alpha-carboxylate 3-dehyd   | ER                | -6.83  | 31.02  | FALSE | TRUE  | TRUE |
| 910 | Q15646 | 2'-5'-oligoadenylate synthase-like p | NUCLEUS           | 0.53   | -22.96 | FALSE | TRUE  | TRUE |
| 911 | Q96N66 | Lysophospholipid acyltransferase 7   | unknown           | -0.14  | 35.57  | FALSE | TRUE  | TRUE |
| 912 | P10398 | Serine/threonine-protein kinase A-l  | unknown           | -0.88  | -9.06  | FALSE | TRUE  | TRUE |
| 913 | Q9NW82 | WD repeat-containing protein 70      | NUCLEUS           | -2.54  | -13.88 | TRUE  | TRUE  | TRUE |
| 914 | Q9Y2S7 | Polymerase delta-interacting protei  | MITOCHONDRIA      | 40.23  | -12.39 | FALSE | TRUE  | TRUE |
| 915 | O60814 | Histone H2B type 1-K                 | NUCLEUS-CHROMATIN | -22.88 | -13.82 | TRUE  | FALSE | TRUE |
| 916 | Q9Y6C9 | Mitochondrial carrier homolog 2      | MITOCHONDRIA      | 34.94  | -9.87  | FALSE | TRUE  | TRUE |
| 917 | Q5JVF3 | PCI domain-containing protein 2      | NUCLEUS           | -1.20  | -26.01 | FALSE | TRUE  | TRUE |
| 918 | Q6YN16 | Hydroxysteroid dehydrogenase-like    | unknown           | 44.91  | -7.63  | FALSE | TRUE  | TRUE |
| 919 | Q5TFE4 | 5'-nucleotidase domain-containing    | unknown           | 24.16  | 24.55  | TRUE  | TRUE  | TRUE |
| 920 | P27105 | Erythrocyte band 7 integral membr    | unknown           | -31.49 | -0.36  | TRUE  | TRUE  | TRUE |
| 921 | P00568 | Adenylate kinase isoenzyme 1         | unknown           | 19.53  | 22.35  | FALSE | TRUE  | TRUE |
| 922 | Q8WXF1 | Paraspeckle component 1              | NUCLEUS           | 2.33   | -33.36 | TRUE  | TRUE  | TRUE |
| 923 | Q7L2J0 | 7SK snRNA methylphosphate cappi      | NUCLEUS           | 0.67   | -26.56 | FALSE | TRUE  | TRUE |
| 924 | Q96C36 | Pyrroline-5-carboxylate reductase 2  | MITOCHONDRIA      | 34.17  | -12.01 | FALSE | TRUE  | TRUE |
| 925 | P54727 | UV excision repair protein RAD23 ho  | unknown           | 23.61  | 13.09  | FALSE | TRUE  | TRUE |
| 926 | P11172 | Uridine 5'-monophosphate synthas     | unknown           | 9.08   | 7.55   | FALSE | TRUE  | TRUE |
| 927 | Q16666 | Gamma-interferon-inducible protein   | NUCLEUS-CHROMATIN | -16.24 | -12.37 | FALSE | TRUE  | TRUE |
| 928 | Q96T37 | RNA-binding protein 15               | NUCLEUS           | -1.16  | -34.92 | FALSE | TRUE  | TRUE |
| 929 | Q9UL25 | Ras-related protein Rab-21           | unknown           | -14.92 | 21.48  | FALSE | TRUE  | TRUE |
| 930 | P49720 | Proteasome subunit beta type-3       | PROTEASOME        | 22.10  | 6.93   | FALSE | TRUE  | TRUE |
| 931 | Q96QK1 | Vacuolar protein sorting-associated  | unknown           | -14.62 | 8.67   | FALSE | TRUE  | TRUE |
| 932 | P16070 | CD44 antigen                         | PM                | -21.25 | 17.27  | TRUE  | TRUE  | TRUE |
| 933 | P50402 | Emerin                               | unknown           | 24.23  | -10.77 | TRUE  | TRUE  | TRUE |
| 934 | Q96KB5 | Lymphokine-activated killer T-cell-c | unknown           | 20.28  | 14.09  | FALSE | TRUE  | TRUE |
| 935 | Q13616 | Cullin-1                             | unknown           | -3.53  | -3.52  | FALSE | TRUE  | TRUE |
| 936 | P38117 | Electron transfer flavoprotein subur | MITOCHONDRIA      | 39.00  | -5.70  | FALSE | TRUE  | TRUE |
| 937 | Q99733 | Nucleosome assembly protein 1-lik    | CYTOSOL           | 19.73  | 17.29  | TRUE  | TRUE  | TRUE |
| 938 | Q92973 | Transportin-1                        | unknown           | 10.51  | 8.40   | FALSE | TRUE  | TRUE |
| 939 | P35659 | Protein DEK                          | unknown           | -21.84 | -21.49 | FALSE | TRUE  | TRUE |
| 940 | P52294 | Importin subunit alpha-5             | unknown           | 12.46  | 2.94   | FALSE | TRUE  | TRUE |
| 941 | Q03252 | Lamin-B2                             | unknown           | 23.63  | -12.63 | FALSE | TRUE  | TRUE |
| 942 | A0FGR8 | Extended synaptotagmin-2             | unknown           | -11.43 | 29.26  | TRUE  | TRUE  | TRUE |
| 943 | Q8WWI1 | LIM domain only protein 7            | unknown           | -3.10  | 2.22   | TRUE  | TRUE  | TRUE |
| 944 | Q96CT7 | Coiled-coil domain-containing prote  | unknown           | 18.16  | -19.53 | TRUE  | TRUE  | TRUE |
| 945 | P55263 | Adenosine kinase                     | unknown           | 19.46  | 22.03  | FALSE | TRUE  | TRUE |
| 946 | P43686 | 26S proteasome regulatory subunit    | PROTEASOME        | 21.18  | 6.67   | FALSE | TRUE  | TRUE |

|     |        |                                        |                   |        |        |       |      |       |
|-----|--------|----------------------------------------|-------------------|--------|--------|-------|------|-------|
| 947 | P25685 | DnaJ homolog subfamily B member        | unknown           | -3.97  | -8.87  | TRUE  | TRUE | TRUE  |
| 948 | Q9UNM6 | 26S proteasome non-ATPase regul        | PROTEASOME        | 21.19  | 6.34   | FALSE | TRUE | TRUE  |
| 949 | P23368 | NAD-dependent malic enzyme, mit        | MITOCHONDRIA      | 38.12  | -3.63  | FALSE | TRUE | TRUE  |
| 950 | Q9BW60 | Elongation of very long chain fatty    | unknown           | -4.90  | 24.17  | FALSE | TRUE | TRUE  |
| 951 | P55327 | Tumor protein D52                      | CYTOSOL           | 12.76  | 24.32  | TRUE  | TRUE | TRUE  |
| 952 | Q9Y2Z0 | Protein SGT1 homolog                   | CYTOSOL           | 20.71  | 22.17  | TRUE  | TRUE | TRUE  |
| 953 | O43396 | Thioredoxin-like protein 1             | unknown           | 20.52  | 20.22  | TRUE  | TRUE | TRUE  |
| 954 | P61163 | Alpha-centractin                       | unknown           | 9.91   | 1.43   | FALSE | TRUE | FALSE |
| 955 | O43809 | Cleavage and polyadenylation spec      | NUCLEUS           | 4.86   | -33.38 | TRUE  | TRUE | TRUE  |
| 956 | Q7Z739 | YTH domain-containing family prot      | unknown           | -4.90  | 19.90  | FALSE | TRUE | TRUE  |
| 957 | Q5VYK3 | Proteasome adapter and scaffold p      | unknown           | 5.62   | -16.81 | FALSE | TRUE | TRUE  |
| 958 | Q04837 | Single-stranded DNA-binding protei     | MITOCHONDRIA      | 29.42  | -8.72  | FALSE | TRUE | TRUE  |
| 959 | Q02978 | Mitochondrial 2-oxoglutarate/mala      | MITOCHONDRIA      | 28.88  | -4.12  | FALSE | TRUE | TRUE  |
| 960 | Q15056 | Eukaryotic translation initiation fact | unknown           | 24.57  | 22.04  | TRUE  | TRUE | TRUE  |
| 961 | Q9UKN8 | General transcription factor 3C poly   | unknown           | -21.63 | -21.36 | FALSE | TRUE | TRUE  |
| 962 | Q5SSJ5 | Heterochromatin protein 1-binding      | NUCLEUS-CHROMATIN | -20.94 | -13.00 | TRUE  | TRUE | TRUE  |
| 963 | Q6ZUT1 | Uncharacterized protein NKAPD1         | NUCLEUS           | 1.52   | -28.18 | FALSE | TRUE | TRUE  |
| 964 | Q9NQC3 | Reticulon-4                            | unknown           | -19.25 | 23.00  | TRUE  | TRUE | TRUE  |
| 965 | Q96HS1 | Serine/threonine-protein phosphat      | MITOCHONDRIA      | 31.42  | -14.80 | FALSE | TRUE | TRUE  |
| 966 | P11216 | Glycogen phosphorylase, brain form     | CYTOSOL           | 18.19  | 18.22  | FALSE | TRUE | TRUE  |
| 967 | Q9UBQ0 | Vacuolar protein sorting-associated    | unknown           | -14.61 | 8.50   | FALSE | TRUE | TRUE  |
| 968 | Q7L576 | Cytoplasmic FMR1-interacting prot      | unknown           | -9.56  | 3.53   | FALSE | TRUE | TRUE  |
| 969 | Q9UHV9 | Prefoldin subunit 2                    | unknown           | 20.58  | 9.55   | FALSE | TRUE | TRUE  |
| 970 | Q9Y490 | Talin-1                                | unknown           | 1.53   | 10.73  | TRUE  | TRUE | TRUE  |
| 971 | Q96G23 | Ceramide synthase 2                    | unknown           | -5.57  | 25.51  | FALSE | TRUE | FALSE |
| 972 | P15927 | Replication protein A 32 kDa subuni    | unknown           | 23.49  | 12.83  | FALSE | TRUE | TRUE  |
| 973 | Q16186 | Proteasomal ubiquitin receptor ADF     | PROTEASOME        | 12.79  | 23.29  | FALSE | TRUE | TRUE  |
| 974 | Q15370 | Elongin-B                              | unknown           | 17.12  | 6.66   | TRUE  | TRUE | TRUE  |
| 975 | Q9NY12 | H/ACA ribonucleoprotein complex        | NUCLEUS           | -3.40  | -38.55 | FALSE | TRUE | TRUE  |
| 976 | Q9Y4P3 | Transducin beta-like protein 2         | ER                | 5.14   | 37.98  | FALSE | TRUE | TRUE  |
| 977 | Q14847 | LIM and SH3 domain protein 1           | unknown           | -3.25  | 8.83   | TRUE  | TRUE | TRUE  |
| 978 | O75874 | Isocitrate dehydrogenase [NADP] c      | CYTOSOL           | 21.47  | 22.66  | FALSE | TRUE | TRUE  |
| 979 | P30046 | D-dopachrome decarboxylase             | unknown           | 19.47  | 13.14  | FALSE | TRUE | TRUE  |
| 980 | P52888 | Thimet oligopeptidase                  | CYTOSOL           | 20.84  | 24.46  | FALSE | TRUE | TRUE  |
| 981 | P26885 | Peptidyl-prolyl cis-trans isomerase    | ER                | -6.29  | 35.85  | FALSE | TRUE | FALSE |
| 982 | Q9BTV4 | Transmembrane protein 43               | ER                | 2.43   | 32.24  | FALSE | TRUE | TRUE  |
| 983 | P43246 | DNA mismatch repair protein Msh2       | NUCLEUS           | -10.11 | -14.73 | FALSE | TRUE | TRUE  |
| 984 | P67812 | Signal peptidase complex catalytic     | unknown           | 2.86   | 33.30  | FALSE | TRUE | TRUE  |

|      |        |                                        |                   |        |        |       |      |       |
|------|--------|----------------------------------------|-------------------|--------|--------|-------|------|-------|
| 985  | P67870 | Casein kinase II subunit beta          | unknown           | 12.24  | 4.01   | FALSE | TRUE | TRUE  |
| 986  | Q96HC4 | PDZ and LIM domain protein 5           | unknown           | -5.00  | -6.56  | TRUE  | TRUE | TRUE  |
| 987  | P22061 | Protein-L-isoaspartate(D-aspartate)    | unknown           | 8.49   | 10.00  | TRUE  | TRUE | TRUE  |
| 988  | Q8WUM0 | Nuclear pore complex protein Nup1      | NUCLEUS           | -20.89 | -29.60 | FALSE | TRUE | TRUE  |
| 989  | P53004 | Biliverdin reductase A                 | CYTOSOL           | 22.27  | 22.74  | FALSE | TRUE | TRUE  |
| 990  | P42330 | Aldo-keto reductase family 1 meml      | unknown           | 12.44  | 22.55  | FALSE | TRUE | TRUE  |
| 991  | Q7Z478 | ATP-dependent RNA helicase DHX2        | RIBOSOME 40S      | 7.79   | -24.75 | TRUE  | TRUE | TRUE  |
| 992  | Q9HC38 | Glyoxalase domain-containing prot      | CYTOSOL           | 21.59  | 21.49  | FALSE | TRUE | TRUE  |
| 993  | Q96KA5 | Cleft lip and palate transmembrane     | ER                | -3.63  | 32.97  | FALSE | TRUE | TRUE  |
| 994  | Q8N5M9 | Protein jagunal homolog 1              | ER                | 4.33   | 30.13  | FALSE | TRUE | TRUE  |
| 995  | Q9Y3B4 | Splicing factor 3B subunit 6           | NUCLEUS           | 4.04   | -35.57 | FALSE | TRUE | TRUE  |
| 996  | P13807 | Glycogen [starch] synthase, muscle     | unknown           | 3.26   | 5.94   | FALSE | TRUE | FALSE |
| 997  | Q8IX12 | Cell division cycle and apoptosis reg  | NUCLEUS           | -20.32 | -32.86 | FALSE | TRUE | TRUE  |
| 998  | Q9UBE0 | SUMO-activating enzyme subunit 1       | unknown           | 27.29  | 23.06  | FALSE | TRUE | TRUE  |
| 999  | Q06265 | Exosome complex component RRP4         | NUCLEUS           | -10.56 | -26.27 | FALSE | TRUE | TRUE  |
| 1000 | Q9H0S4 | Probable ATP-dependent RNA helic       | NUCLEUS           | -0.99  | -29.99 | FALSE | TRUE | TRUE  |
| 1001 | Q16222 | UDP-N-acetylhexosamine pyrophos        | CYTOSOL           | 20.71  | 21.41  | FALSE | TRUE | TRUE  |
| 1002 | Q14683 | Structural maintenance of chromos      | NUCLEUS-CHROMATIN | -18.20 | -16.04 | FALSE | TRUE | TRUE  |
| 1003 | P49005 | DNA polymerase delta subunit 2         | unknown           | 16.14  | 2.97   | FALSE | TRUE | TRUE  |
| 1004 | Q9NUQ8 | ATP-binding cassette sub-family F r    | unknown           | -2.35  | -9.77  | FALSE | TRUE | TRUE  |
| 1005 | Q9Y3B3 | Transmembrane emp24 domain-cc          | unknown           | -10.90 | 32.76  | FALSE | TRUE | FALSE |
| 1006 | P55036 | 26S proteasome non-ATPase reguli       | PROTEASOME        | 19.89  | 7.00   | TRUE  | TRUE | TRUE  |
| 1007 | Q15372 | Eukaryotic translation initiation fact | unknown           | 13.67  | -10.93 | TRUE  | TRUE | TRUE  |
| 1008 | Q14573 | Inositol 1,4,5-trisphosphate recepto   | ER                | -4.28  | 30.57  | FALSE | TRUE | TRUE  |
| 1009 | Q14694 | Ubiquitin carboxyl-terminal hydrola    | unknown           | 6.76   | -20.23 | FALSE | TRUE | TRUE  |
| 1010 | Q9NVI1 | Fanconi anemia group I protein         | NUCLEUS           | -9.66  | -15.53 | FALSE | TRUE | TRUE  |
| 1011 | P26583 | High mobility group protein B2         | NUCLEUS-CHROMATIN | -16.52 | -12.19 | FALSE | TRUE | TRUE  |
| 1012 | P68400 | Casein kinase II subunit alpha         | unknown           | 12.32  | 3.74   | FALSE | TRUE | FALSE |
| 1013 | Q99570 | Phosphoinositide 3-kinase regulato     | unknown           | 4.63   | -12.44 | FALSE | TRUE | TRUE  |
| 1014 | Q9HCE1 | Helicase MOV-10                        | unknown           | 4.19   | -22.44 | FALSE | TRUE | TRUE  |
| 1015 | P51570 | Galactokinase                          | CYTOSOL           | 19.77  | 16.43  | FALSE | TRUE | TRUE  |
| 1016 | Q8IYB8 | ATP-dependent RNA helicase SUPV        | MITOCHONDRIA      | 30.84  | -13.63 | FALSE | TRUE | TRUE  |
| 1017 | P10515 | Dihydrolipoyllysine-residue acetyltr   | MITOCHONDRIA      | 42.51  | -11.30 | FALSE | TRUE | TRUE  |
| 1018 | P51648 | Fatty aldehyde dehydrogenase           | ER                | -0.06  | 33.77  | FALSE | TRUE | TRUE  |
| 1019 | Q9H0H5 | Rac GTPase-activating protein 1        | unknown           | -14.04 | -11.19 | TRUE  | TRUE | TRUE  |
| 1020 | P56545 | C-terminal-binding protein 2           | NUCLEUS           | -8.38  | -15.77 | FALSE | TRUE | FALSE |
| 1021 | Q9BRU9 | rRNA-processing protein UTP23 hor      | NUCLEUS           | 1.42   | -29.35 | FALSE | TRUE | FALSE |
| 1022 | P30566 | Adenylosuccinate lyase                 | unknown           | 4.38   | -11.36 | FALSE | TRUE | TRUE  |

|      |        |                                        |              |        |        |       |      |      |
|------|--------|----------------------------------------|--------------|--------|--------|-------|------|------|
| 1023 | O95816 | BAG family molecular chaperone re      | unknown      | 1.74   | 26.29  | FALSE | TRUE | TRUE |
| 1024 | Q9HB07 | UPF0160 protein MYG1, mitochond        | CYTOSOL      | 16.72  | 16.01  | FALSE | TRUE | TRUE |
| 1025 | Q9P2R7 | Succinate--CoA ligase [ADP-forming     | MITOCHONDRIA | 38.15  | -7.43  | FALSE | TRUE | TRUE |
| 1026 | Q7L1Q6 | Basic leucine zipper and W2 domain     | NUCLEUS      | -3.14  | -9.69  | FALSE | TRUE | TRUE |
| 1027 | Q9BWM7 | Sideroflexin-3                         | MITOCHONDRIA | 35.15  | -7.30  | FALSE | TRUE | TRUE |
| 1028 | Q9H488 | GDP-fucose protein O-fucosyltransf     | ER           | -1.37  | 39.16  | FALSE | TRUE | TRUE |
| 1029 | Q9H8H0 | Nucleolar protein 11                   | NUCLEUS      | -2.66  | -41.38 | FALSE | TRUE | TRUE |
| 1030 | P78344 | Eukaryotic translation initiation fact | unknown      | 5.84   | -22.38 | TRUE  | TRUE | TRUE |
| 1031 | P30043 | Flavin reductase (NADPH)               | CYTOSOL      | 21.17  | 14.55  | FALSE | TRUE | TRUE |
| 1032 | Q02790 | Peptidyl-prolyl cis-trans isomerase I  | CYTOSOL      | 22.98  | 21.71  | FALSE | TRUE | TRUE |
| 1033 | Q13045 | Protein flightless-1 homolog           | unknown      | 5.05   | 0.70   | FALSE | TRUE | TRUE |
| 1034 | Q8N766 | ER membrane protein complex subu       | ER           | 3.00   | 35.04  | FALSE | TRUE | TRUE |
| 1035 | P98082 | Disabled homolog 2                     | unknown      | -8.86  | 14.36  | TRUE  | TRUE | TRUE |
| 1036 | Q13442 | 28 kDa heat- and acid-stable phosph    | unknown      | 3.70   | -22.54 | TRUE  | TRUE | TRUE |
| 1037 | P35270 | Sepiapterin reductase                  | unknown      | 20.09  | -3.03  | FALSE | TRUE | TRUE |
| 1038 | Q13501 | Sequestosome-1                         | unknown      | -30.72 | 3.10   | FALSE | TRUE | TRUE |
| 1039 | Q15020 | Squamous cell carcinoma antigen re     | unknown      | 21.63  | 11.91  | TRUE  | TRUE | TRUE |
| 1040 | Q16637 | Survival motor neuron protein          | NUCLEUS      | -1.00  | -22.62 | FALSE | TRUE | TRUE |
| 1041 | Q14247 | Src substrate cortactin                | NUCLEUS      | 3.91   | 3.73   | TRUE  | TRUE | TRUE |
| 1042 | Q9BTX1 | Nucleoporin NDC1                       | unknown      | 24.27  | -10.12 | FALSE | TRUE | TRUE |
| 1043 | Q9BUB7 | Transmembrane protein 70, mitoch       | unknown      | 31.96  | -3.87  | FALSE | TRUE | TRUE |
| 1044 | P49321 | Nuclear autoantigenic sperm protei     | unknown      | 27.33  | 23.13  | TRUE  | TRUE | TRUE |
| 1045 | P19388 | DNA-directed RNA polymerases I, II     | NUCLEUS      | -13.40 | -29.35 | FALSE | TRUE | TRUE |
| 1046 | O60610 | Protein diaphanous homolog 1           | unknown      | 5.39   | 9.32   | TRUE  | TRUE | TRUE |
| 1047 | P35244 | Replication protein A 14 kDa subuni    | unknown      | 18.17  | 11.03  | FALSE | TRUE | TRUE |
| 1048 | Q13867 | Bleomycin hydrolase                    | unknown      | 13.89  | 17.54  | FALSE | TRUE | TRUE |
| 1049 | P24666 | Low molecular weight phosphotyros      | CYTOSOL      | 17.99  | 15.25  | FALSE | TRUE | TRUE |
| 1050 | O43670 | BUB3-interacting and GLEBS motif-c     | NUCLEUS      | 2.08   | -31.61 | FALSE | TRUE | TRUE |
| 1051 | Q9NPI1 | Bromodomain-containing protein 7       | unknown      | -18.46 | -11.22 | FALSE | TRUE | TRUE |
| 1052 | O00422 | Histone deacetylase complex subur      | NUCLEUS      | -4.47  | -40.20 | FALSE | TRUE | TRUE |
| 1053 | Q12797 | Aspartyl/asparaginy beta-hydroxy       | ER           | 4.42   | 36.63  | FALSE | TRUE | TRUE |
| 1054 | P20073 | Annexin A7                             | unknown      | 13.25  | 17.14  | FALSE | TRUE | TRUE |
| 1055 | O75396 | Vesicle-trafficking protein SEC22b     | ER           | -4.36  | 32.65  | TRUE  | TRUE | TRUE |
| 1056 | O14579 | Coatomer subunit epsilon               | unknown      | 6.48   | 4.07   | FALSE | TRUE | TRUE |
| 1057 | P49721 | Proteasome subunit beta type-2         | PROTEASOME   | 22.17  | 6.77   | FALSE | TRUE | TRUE |
| 1058 | O43252 | Bifunctional 3'-phosphoadenosine 5     | unknown      | 17.49  | 6.69   | FALSE | TRUE | TRUE |
| 1059 | O60524 | Nuclear export mediator factor NEM     | unknown      | 9.26   | -3.93  | TRUE  | TRUE | TRUE |
| 1060 | Q9H4L4 | Sentrin-specific protease 3            | NUCLEUS      | -15.58 | -25.20 | FALSE | TRUE | TRUE |

|      |        |                                        |                   |        |        |       |      |       |
|------|--------|----------------------------------------|-------------------|--------|--------|-------|------|-------|
| 1061 | Q15054 | DNA polymerase delta subunit 3         | NUCLEUS           | 3.06   | -3.01  | TRUE  | TRUE | TRUE  |
| 1062 | O95347 | Structural maintenance of chromos      | unknown           | -7.71  | -9.03  | TRUE  | TRUE | TRUE  |
| 1063 | Q15155 | Nodal modulator 1                      | unknown           | 3.41   | 38.26  | FALSE | TRUE | TRUE  |
| 1064 | P05556 | Integrin beta-1                        | PM                | -20.13 | 18.88  | TRUE  | TRUE | TRUE  |
| 1065 | Q6UW68 | Transmembrane protein 205              | ER                | -4.09  | 27.40  | FALSE | TRUE | FALSE |
| 1066 | O96000 | NADH dehydrogenase [ubiquinone]        | MITOCHONDRIA      | 31.05  | -14.33 | FALSE | TRUE | TRUE  |
| 1067 | Q9NQ55 | Suppressor of SWI4 1 homolog           | NUCLEUS           | -0.55  | -40.86 | FALSE | TRUE | TRUE  |
| 1068 | Q96D46 | 60S ribosomal export protein NMD3      | unknown           | 3.38   | -17.72 | FALSE | TRUE | TRUE  |
| 1069 | P50995 | Annexin A11                            | unknown           | 8.98   | 13.59  | FALSE | TRUE | TRUE  |
| 1070 | Q9H9J4 | Ubiquitin carboxyl-terminal hydrola    | NUCLEUS           | 1.25   | -36.56 | FALSE | TRUE | TRUE  |
| 1071 | Q9NR50 | Translation initiation factor eIF-2B s | unknown           | 12.84  | 6.80   | FALSE | TRUE | FALSE |
| 1072 | Q9Y2R5 | 28S ribosomal protein S17, mitoch      | MITOCHONDRIA      | 40.62  | -5.85  | FALSE | TRUE | TRUE  |
| 1073 | Q9BPX3 | Condensin complex subunit 3            | unknown           | -8.09  | -9.03  | FALSE | TRUE | FALSE |
| 1074 | O60684 | Importin subunit alpha-7               | unknown           | 12.70  | 6.87   | FALSE | TRUE | TRUE  |
| 1075 | O75223 | Gamma-glutamylcyclotransferase         | unknown           | 19.69  | 25.27  | FALSE | TRUE | TRUE  |
| 1076 | Q9HD45 | Transmembrane 9 superfamily mem        | GOLGI             | -18.00 | 32.81  | FALSE | TRUE | TRUE  |
| 1077 | P62330 | ADP-ribosylation factor 6              | unknown           | -11.47 | 19.80  | FALSE | TRUE | FALSE |
| 1078 | Q00765 | Receptor expression-enhancing pro      | unknown           | -13.08 | 29.78  | FALSE | TRUE | TRUE  |
| 1079 | P10155 | 60 kDa SS-A/Ro ribonucleoprotein       | unknown           | 8.74   | 2.95   | FALSE | TRUE | FALSE |
| 1080 | Q9P0L0 | Vesicle-associated membrane prot       | unknown           | -8.39  | 35.74  | FALSE | TRUE | TRUE  |
| 1081 | Q6UXN9 | WD repeat-containing protein 82        | NUCLEUS           | -6.92  | -30.61 | FALSE | TRUE | TRUE  |
| 1082 | O60443 | Gasdermin-E                            | unknown           | 7.69   | 12.71  | FALSE | TRUE | TRUE  |
| 1083 | Q9NYU2 | UDP-glucose:glycoprotein glucosylt     | ER                | -2.33  | 37.69  | FALSE | TRUE | TRUE  |
| 1084 | Q96A35 | 39S ribosomal protein L24, mitoch      | MITOCHONDRIA      | 43.04  | -6.65  | FALSE | TRUE | FALSE |
| 1085 | Q9UIG0 | Tyrosine-protein kinase BAZ1B          | NUCLEUS-CHROMATIN | -21.88 | -14.05 | TRUE  | TRUE | TRUE  |
| 1086 | Q9BRP8 | Partner of Y14 and mago                | unknown           | 12.21  | -21.62 | TRUE  | TRUE | TRUE  |
| 1087 | Q9H1A4 | Anaphase-promoting complex subu        | NUCLEUS           | -14.46 | -27.11 | FALSE | TRUE | TRUE  |
| 1088 | P82979 | SAP domain-containing ribonucleop      | NUCLEUS           | -11.16 | -24.27 | FALSE | TRUE | TRUE  |
| 1089 | Q00341 | Vigilin                                | RIBOSOME 60S      | 16.60  | -23.92 | TRUE  | TRUE | TRUE  |
| 1090 | Q8IY67 | Ribonucleoprotein PTB-binding 1        | NUCLEUS           | -18.19 | -27.58 | TRUE  | TRUE | TRUE  |
| 1091 | Q9UBT2 | SUMO-activating enzyme subunit 2       | unknown           | 27.33  | 23.03  | FALSE | TRUE | TRUE  |
| 1092 | Q08257 | Quinone oxidoreductase                 | MITOCHONDRIA      | 33.62  | -5.67  | FALSE | TRUE | TRUE  |
| 1093 | O94905 | Erlin-2                                | ER                | -4.83  | 30.93  | FALSE | TRUE | TRUE  |
| 1094 | Q99615 | DnaJ homolog subfamily C member        | unknown           | 11.60  | 4.18   | FALSE | TRUE | TRUE  |
| 1095 | Q13011 | Delta(3,5)-Delta(2,4)-dienoyl-CoA is   | MITOCHONDRIA      | 36.50  | -6.04  | FALSE | TRUE | TRUE  |
| 1096 | Q9BRJ2 | 39S ribosomal protein L45, mitoch      | MITOCHONDRIA      | 39.77  | -5.12  | FALSE | TRUE | TRUE  |
| 1097 | O14745 | Na(+)/H(+) exchange regulatory co      | PM                | -27.16 | 11.02  | TRUE  | TRUE | TRUE  |
| 1098 | Q9BTT0 | Acidic leucine-rich nuclear phospho    | unknown           | 22.07  | 13.13  | FALSE | TRUE | TRUE  |

|      |        |                                       |              |        |        |       |       |       |
|------|--------|---------------------------------------|--------------|--------|--------|-------|-------|-------|
| 1099 | Q99808 | Equilibrative nucleoside transporter  | unknown      | -21.57 | 20.29  | TRUE  | TRUE  | TRUE  |
| 1100 | Q9Y512 | Sorting and assembly machinery co     | unknown      | 27.87  | -13.10 | FALSE | TRUE  | TRUE  |
| 1101 | Q13435 | Splicing factor 3B subunit 2          | NUCLEUS      | 4.57   | -35.16 | TRUE  | TRUE  | TRUE  |
| 1102 | Q99536 | Synaptic vesicle membrane protein     | unknown      | -7.69  | 18.74  | FALSE | TRUE  | TRUE  |
| 1103 | P52788 | Spermine synthase                     | CYTOSOL      | 20.23  | 22.96  | FALSE | TRUE  | TRUE  |
| 1104 | P35080 | Profilin-2                            | CYTOSOL      | 24.03  | 19.78  | FALSE | TRUE  | TRUE  |
| 1105 | P21266 | Glutathione S-transferase Mu 3        | unknown      | 21.52  | 13.72  | FALSE | TRUE  | TRUE  |
| 1106 | Q09161 | Nuclear cap-binding protein subunit   | NUCLEUS      | -12.48 | -29.33 | FALSE | TRUE  | TRUE  |
| 1107 | Q9Y5J1 | U3 small nucleolar RNA-associated     | NUCLEUS      | -2.18  | -40.64 | FALSE | TRUE  | TRUE  |
| 1108 | P49773 | Histidine triad nucleotide-binding pr | unknown      | 23.17  | 22.70  | FALSE | TRUE  | TRUE  |
| 1109 | Q00796 | Sorbitol dehydrogenase                | unknown      | 2.52   | -13.33 | FALSE | TRUE  | TRUE  |
| 1110 | Q01844 | RNA-binding protein EWS               | NUCLEUS      | -6.57  | -30.25 | FALSE | TRUE  | TRUE  |
| 1111 | O75947 | ATP synthase subunit d, mitochond     | MITOCHONDRIA | 41.94  | -12.78 | FALSE | TRUE  | TRUE  |
| 1112 | Q8NBQ5 | Estradiol 17-beta-dehydrogenase 1     | unknown      | 5.73   | 33.38  | FALSE | TRUE  | TRUE  |
| 1113 | Q9Y3E5 | Peptidyl-tRNA hydrolase 2, mitoch     | unknown      | 2.81   | 34.47  | FALSE | TRUE  | TRUE  |
| 1114 | Q12789 | General transcription factor 3C poly  | unknown      | -22.55 | -22.15 | FALSE | TRUE  | TRUE  |
| 1115 | Q96IU4 | Protein ABHD14B                       | unknown      | 22.87  | 23.00  | FALSE | TRUE  | TRUE  |
| 1116 | P23258 | Tubulin gamma-1 chain                 | unknown      | 5.99   | -24.53 | FALSE | TRUE  | TRUE  |
| 1117 | P52815 | 39S ribosomal protein L12, mitoch     | MITOCHONDRIA | 39.80  | -10.93 | FALSE | TRUE  | TRUE  |
| 1118 | Q6RFH5 | WD repeat-containing protein 74       | NUCLEUS      | -1.20  | -37.52 | FALSE | TRUE  | TRUE  |
| 1119 | O15258 | Protein RER1                          | unknown      | -0.11  | 33.57  | FALSE | TRUE  | TRUE  |
| 1120 | Q5W0B1 | RING finger protein 219               | unknown      | 9.60   | -19.31 | TRUE  | TRUE  | TRUE  |
| 1121 | Q15942 | Zyxin                                 | unknown      | -3.78  | 9.37   | TRUE  | TRUE  | TRUE  |
| 1122 | P09543 | 2',3'-cyclic-nucleotide 3'-phosphodi  | unknown      | -14.91 | 15.75  | FALSE | TRUE  | TRUE  |
| 1123 | Q92544 | Transmembrane 9 superfamily me        | unknown      | -22.31 | 30.88  | FALSE | TRUE  | TRUE  |
| 1124 | Q9NUQ9 | Protein FAM49B                        | unknown      | 11.11  | 14.60  | FALSE | TRUE  | FALSE |
| 1125 | P51116 | Fragile X mental retardation syndro   | unknown      | 8.21   | -25.48 | FALSE | TRUE  | TRUE  |
| 1126 | Q9GZR7 | ATP-dependent RNA helicase DDX2       | NUCLEUS      | -1.36  | -36.83 | FALSE | TRUE  | TRUE  |
| 1127 | Q9NWB6 | Arginine and glutamate-rich proteir   | NUCLEUS      | 2.41   | -31.92 | TRUE  | FALSE | TRUE  |
| 1128 | P09001 | 39S ribosomal protein L3, mitochon    | MITOCHONDRIA | 42.91  | -11.63 | FALSE | TRUE  | TRUE  |
| 1129 | Q9UKY7 | Protein CDV3 homolog                  | unknown      | 11.40  | -1.16  | TRUE  | TRUE  | TRUE  |
| 1130 | Q9H936 | Mitochondrial glutamate carrier 1     | unknown      | 44.28  | -13.16 | FALSE | TRUE  | FALSE |
| 1131 | Q9H2P0 | Activity-dependent neuroprotector     | NUCLEUS      | -25.54 | -25.92 | TRUE  | TRUE  | TRUE  |
| 1132 | Q9BXJ9 | N-alpha-acetyltransferase 15, NatA    | unknown      | 10.13  | -13.00 | FALSE | TRUE  | TRUE  |
| 1133 | Q92879 | CUGBP Elav-like family member 1       | NUCLEUS      | -19.91 | -32.82 | FALSE | TRUE  | TRUE  |
| 1134 | Q969H8 | Myeloid-derived growth factor         | ER           | -2.19  | 37.48  | FALSE | TRUE  | FALSE |
| 1135 | Q13409 | Cytoplasmic dynein 1 intermediate     | unknown      | -11.34 | -7.39  | FALSE | TRUE  | TRUE  |
| 1136 | Q9Y570 | Protein phosphatase methylesteras     | CYTOSOL      | 19.41  | 22.42  | FALSE | TRUE  | TRUE  |

|      |        |                                                                 |              |        |        |       |      |       |
|------|--------|-----------------------------------------------------------------|--------------|--------|--------|-------|------|-------|
| 1137 | Q9H490 | Phosphatidylinositol glycan anchor                              | unknown      | 2.56   | 31.19  | FALSE | TRUE | TRUE  |
| 1138 | P00387 | NADH-cytochrome b5 reductase 3                                  | unknown      | 1.79   | 33.20  | FALSE | TRUE | TRUE  |
| 1139 | O95602 | DNA-directed RNA polymerase I subunit                           | NUCLEUS      | -24.52 | -26.16 | FALSE | TRUE | TRUE  |
| 1140 | Q9NTJ5 | Phosphatidylinositide phosphatase                               | unknown      | -10.49 | 30.00  | FALSE | TRUE | TRUE  |
| 1141 | P30626 | Sorcin                                                          | unknown      | 18.35  | 18.94  | FALSE | TRUE | TRUE  |
| 1142 | Q16401 | 26S proteasome non-ATPase regulatory subunit 1                  | unknown      | 20.77  | 19.27  | FALSE | TRUE | TRUE  |
| 1143 | Q9ULC4 | Malignant T-cell-amplified sequence 1                           | unknown      | -11.54 | -10.70 | FALSE | TRUE | TRUE  |
| 1144 | O75251 | NADH dehydrogenase [ubiquinone] cytochrome b5 complex subunit 1 | MITOCHONDRIA | 30.94  | -9.96  | FALSE | TRUE | FALSE |
| 1145 | Q8WW12 | PEST proteolytic signal-containing protein 1                    | unknown      | 12.12  | -11.12 | TRUE  | TRUE | TRUE  |
| 1146 | Q96RS6 | NudC domain-containing protein 1                                | unknown      | 20.99  | 16.41  | FALSE | TRUE | TRUE  |
| 1147 | Q32P28 | Prolyl 3-hydroxylase 1                                          | unknown      | 2.48   | 39.54  | FALSE | TRUE | TRUE  |
| 1148 | O76070 | Gamma-synuclein                                                 | CYTOSOL      | 17.89  | 22.50  | TRUE  | TRUE | TRUE  |
| 1149 | Q9Y2A7 | Nck-associated protein 1                                        | unknown      | -9.56  | 3.67   | FALSE | TRUE | TRUE  |
| 1150 | Q9HAV4 | Exportin-5                                                      | unknown      | 12.97  | -2.13  | FALSE | TRUE | TRUE  |
| 1151 | Q9UBU9 | Nuclear RNA export factor 1                                     | NUCLEUS      | -5.30  | -23.95 | FALSE | TRUE | TRUE  |
| 1152 | Q8WTT2 | Nucleolar complex protein 3 homolog                             | NUCLEUS      | 2.27   | -35.70 | FALSE | TRUE | TRUE  |
| 1153 | Q92597 | Protein NDRG1                                                   | unknown      | 8.95   | 13.46  | FALSE | TRUE | TRUE  |
| 1154 | Q15843 | NEDD8                                                           | unknown      | -33.55 | -1.90  | FALSE | TRUE | FALSE |
| 1155 | Q6P1J9 | Parafibromin                                                    | NUCLEUS      | -13.32 | -27.07 | FALSE | TRUE | TRUE  |
| 1156 | Q8TD26 | Chromodomain-helicase-DNA-binding protein 1                     | NUCLEUS      | -20.44 | -22.49 | TRUE  | TRUE | TRUE  |
| 1157 | Q9H832 | Ubiquitin-conjugating enzyme E2 Z                               | unknown      | 17.16  | 12.91  | FALSE | TRUE | TRUE  |
| 1158 | Q96J01 | THO complex subunit 3                                           | NUCLEUS      | -11.49 | -25.75 | FALSE | TRUE | FALSE |
| 1159 | Q13144 | Translation initiation factor eIF-2B subunit 1                  | unknown      | 12.99  | 6.87   | FALSE | TRUE | TRUE  |
| 1160 | P10768 | S-formylglutathione hydrolase                                   | unknown      | 20.89  | 24.63  | FALSE | TRUE | TRUE  |
| 1161 | O60762 | Dolichol-phosphate mannosyltransferase 1                        | ER           | 4.82   | 34.86  | FALSE | TRUE | TRUE  |
| 1162 | Q9H6R0 | ATP-dependent RNA helicase DHX3                                 | NUCLEUS      | -0.86  | -38.61 | FALSE | TRUE | TRUE  |
| 1163 | P46459 | Vesicle-fusing ATPase                                           | unknown      | -3.76  | 4.75   | FALSE | TRUE | TRUE  |
| 1164 | Q06323 | Proteasome activator complex subunit 1                          | unknown      | 25.29  | 23.49  | FALSE | TRUE | TRUE  |
| 1165 | P33176 | Kinesin-1 heavy chain                                           | unknown      | 0.37   | -4.72  | TRUE  | TRUE | TRUE  |
| 1166 | Q9HDC9 | Adipocyte plasma membrane-associated protein 1                  | ER           | -5.92  | 32.27  | FALSE | TRUE | TRUE  |
| 1167 | Q9Y316 | Protein MEMO1                                                   | unknown      | 11.99  | 22.70  | FALSE | TRUE | TRUE  |
| 1168 | O00767 | Acyl-CoA desaturase                                             | unknown      | -2.51  | 31.80  | FALSE | TRUE | TRUE  |
| 1169 | P49406 | 39S ribosomal protein L19, mitochondrial                        | unknown      | 44.10  | -13.36 | FALSE | TRUE | TRUE  |
| 1170 | P23634 | Plasma membrane calcium-transceptor 1                           | PM           | -23.48 | 16.18  | TRUE  | TRUE | TRUE  |
| 1171 | Q96QD8 | Sodium-coupled neutral amino acid transporter 1                 | unknown      | -34.16 | 8.03   | TRUE  | TRUE | TRUE  |
| 1172 | O15355 | Protein phosphatase 1G                                          | unknown      | 27.17  | 22.58  | TRUE  | TRUE | TRUE  |
| 1173 | P36776 | Lon protease homolog, mitochondrial                             | MITOCHONDRIA | 36.20  | -2.47  | FALSE | TRUE | TRUE  |
| 1174 | O94826 | Mitochondrial import receptor subunit 1                         | MITOCHONDRIA | 42.63  | -6.37  | FALSE | TRUE | TRUE  |

|      |        |                                      |                   |        |        |       |       |       |
|------|--------|--------------------------------------|-------------------|--------|--------|-------|-------|-------|
| 1175 | P17612 | cAMP-dependent protein kinase ca     | unknown           | 1.89   | 11.56  | FALSE | TRUE  | FALSE |
| 1176 | P82650 | 28S ribosomal protein S22, mitoch    | MITOCHONDRIA      | 40.39  | -10.06 | FALSE | TRUE  | TRUE  |
| 1177 | O15145 | Actin-related protein 2/3 complex s  | unknown           | 1.53   | -14.57 | FALSE | TRUE  | TRUE  |
| 1178 | O14776 | Transcription elongation regulator 1 | NUCLEUS           | -1.76  | -34.06 | TRUE  | TRUE  | TRUE  |
| 1179 | Q9NP72 | Ras-related protein Rab-18           | unknown           | -19.28 | 22.78  | FALSE | TRUE  | FALSE |
| 1180 | P57678 | Gem-associated protein 4             | NUCLEUS           | -0.88  | -22.42 | FALSE | TRUE  | TRUE  |
| 1181 | Q9GZT3 | SRA stem-loop-interacting RNA-bin    | MITOCHONDRIA      | 40.86  | -1.81  | FALSE | TRUE  | TRUE  |
| 1182 | P48960 | CD97 antigen                         | unknown           | -30.69 | 13.99  | FALSE | TRUE  | TRUE  |
| 1183 | Q9NTX5 | Ethylmalonyl-CoA decarboxylase       | unknown           | 24.14  | -6.55  | TRUE  | TRUE  | TRUE  |
| 1184 | Q96C19 | EF-hand domain-containing protein    | unknown           | 19.04  | 16.40  | TRUE  | TRUE  | TRUE  |
| 1185 | P47985 | Cytochrome b-c1 complex subunit F    | MITOCHONDRIA      | 39.03  | -0.19  | FALSE | TRUE  | FALSE |
| 1186 | Q93008 | Probable ubiquitin carboxyl-termina  | unknown           | 14.41  | 8.12   | FALSE | TRUE  | TRUE  |
| 1187 | P09012 | U1 small nuclear ribonucleoprotein   | NUCLEUS           | 6.09   | -34.32 | FALSE | TRUE  | TRUE  |
| 1188 | Q16698 | 2,4-dienoyl-CoA reductase, mitoch    | MITOCHONDRIA      | 32.36  | -12.54 | FALSE | TRUE  | TRUE  |
| 1189 | Q96CN7 | Isochorismatase domain-containing    | unknown           | 10.11  | 8.49   | FALSE | TRUE  | TRUE  |
| 1190 | P61086 | Ubiquitin-conjugating enzyme E2 K    | unknown           | 13.64  | 23.94  | FALSE | TRUE  | TRUE  |
| 1191 | O43747 | AP-1 complex subunit gamma-1         | unknown           | -33.26 | 19.63  | FALSE | TRUE  | TRUE  |
| 1192 | Q9Y6A9 | Signal peptidase complex subunit 1   | unknown           | 5.12   | 35.26  | FALSE | TRUE  | FALSE |
| 1193 | P43307 | Translocon-associated protein subu   | ER                | 5.16   | 37.74  | FALSE | TRUE  | TRUE  |
| 1194 | Q01780 | Exosome component 10                 | NUCLEUS           | -10.90 | -25.29 | FALSE | TRUE  | TRUE  |
| 1195 | O95486 | Protein transport protein Sec24A     | unknown           | 9.59   | -18.27 | FALSE | TRUE  | TRUE  |
| 1196 | Q8WXA9 | Splicing regulatory glutamine/lysine | NUCLEUS           | 3.53   | -31.38 | FALSE | TRUE  | TRUE  |
| 1197 | O15173 | Membrane-associated progesteron      | unknown           | -7.32  | 31.90  | FALSE | TRUE  | TRUE  |
| 1198 | P0C0S5 | Histone H2A.Z                        | NUCLEUS-CHROMATIN | -23.02 | -13.69 | FALSE | FALSE | TRUE  |
| 1199 | Q9Y6K5 | 2'-5'-oligoadenylate synthase 3      | unknown           | 9.79   | -20.45 | FALSE | TRUE  | TRUE  |
| 1200 | Q99436 | Proteasome subunit beta type-7       | PROTEASOME        | 22.43  | 6.86   | FALSE | TRUE  | TRUE  |
| 1201 | Q14116 | Interleukin-18                       | CYTOSOL           | 22.51  | 19.61  | FALSE | TRUE  | TRUE  |
| 1202 | Q7RTV0 | PHD finger-like domain-containing p  | NUCLEUS           | 3.89   | -35.20 | FALSE | TRUE  | TRUE  |
| 1203 | Q9NP97 | Dynein light chain roadblock-type 1  | NUCLEUS           | -11.24 | -7.31  | FALSE | TRUE  | FALSE |
| 1204 | O95747 | Serine/threonine-protein kinase      | unknown           | 13.95  | 4.95   | TRUE  | TRUE  | TRUE  |
| 1205 | Q53H12 | Acylglycerol kinase, mitochondrial   | MITOCHONDRIA      | 36.04  | -15.10 | FALSE | TRUE  | FALSE |
| 1206 | Q9UNZ2 | NSFL1 cofactor p47                   | unknown           | 15.27  | 21.78  | TRUE  | TRUE  | TRUE  |
| 1207 | P68036 | Ubiquitin-conjugating enzyme E2 L3   | unknown           | 24.37  | 19.86  | FALSE | TRUE  | TRUE  |
| 1208 | Q8N684 | Cleavage and polyadenylation spec    | NUCLEUS           | -9.35  | -35.99 | FALSE | TRUE  | TRUE  |
| 1209 | P58546 | Myotrophin                           | unknown           | 12.41  | 18.62  | FALSE | TRUE  | TRUE  |
| 1210 | Q08380 | Galectin-3-binding protein           | PM                | -25.99 | 17.88  | FALSE | TRUE  | FALSE |
| 1211 | Q9NRG9 | Aladin                               | unknown           | 24.30  | -9.99  | FALSE | TRUE  | FALSE |
| 1212 | Q0VDF9 | Heat shock 70 kDa protein 14         | NUCLEUS           | -3.20  | -14.09 | FALSE | TRUE  | TRUE  |



|      |        |                                                 |              |        |        |       |       |       |
|------|--------|-------------------------------------------------|--------------|--------|--------|-------|-------|-------|
| 1213 | Q7Z417 | Nuclear fragile X mental retardation protein    | unknown      | 8.20   | -22.32 | TRUE  | TRUE  | TRUE  |
| 1214 | O14880 | Microsomal glutathione S-transferase 1          | unknown      | 27.41  | -12.93 | FALSE | TRUE  | TRUE  |
| 1215 | Q92734 | Protein TFG                                     | CYTOSOL      | 15.58  | 23.02  | FALSE | TRUE  | TRUE  |
| 1216 | O75608 | Acyl-protein thioesterase 1                     | unknown      | 20.01  | -2.98  | FALSE | TRUE  | TRUE  |
| 1217 | Q9Y3A6 | Transmembrane emp24 domain-containing protein   | unknown      | -12.93 | 31.75  | FALSE | TRUE  | FALSE |
| 1218 | Q9H299 | SH3 domain-binding glutamic acid-rich protein   | unknown      | 14.54  | 16.32  | FALSE | TRUE  | TRUE  |
| 1219 | P36957 | Dihydrolipoyllysine-residue succinyltransferase | MITOCHONDRIA | 39.69  | -9.46  | FALSE | TRUE  | TRUE  |
| 1220 | Q8NF37 | Lysophosphatidylcholine acyltransferase         | unknown      | -9.44  | 29.62  | FALSE | TRUE  | TRUE  |
| 1221 | Q14203 | Dynactin subunit 1                              | unknown      | 9.89   | 0.96   | FALSE | TRUE  | TRUE  |
| 1222 | Q15021 | Condensin complex subunit 1                     | unknown      | -7.93  | -9.12  | TRUE  | TRUE  | TRUE  |
| 1223 | Q9UI30 | Multifunctional methyltransferase               | unknown      | 11.29  | 4.06   | FALSE | TRUE  | TRUE  |
| 1224 | Q9Y285 | Phenylalanine--tRNA ligase alpha subunit        | unknown      | -4.90  | -10.90 | FALSE | TRUE  | TRUE  |
| 1225 | P08574 | Cytochrome c1, heme protein, mitochondrial      | MITOCHONDRIA | 32.89  | -11.13 | FALSE | TRUE  | TRUE  |
| 1226 | Q6PIU2 | Neutral cholesterol ester hydrolase             | ER           | -2.93  | 32.05  | FALSE | TRUE  | TRUE  |
| 1227 | Q13885 | Tubulin beta-2A chain                           | unknown      | 12.04  | 22.35  | FALSE | FALSE | TRUE  |
| 1228 | P69905 | Hemoglobin subunit alpha                        | unknown      | -13.83 | -8.97  | FALSE | TRUE  | FALSE |
| 1229 | Q9BZG1 | Ras-related protein Rab-34                      | unknown      | -20.90 | 19.89  | FALSE | TRUE  | TRUE  |
| 1230 | Q6L8Q7 | 2',5'-phosphodiesterase 12                      | unknown      | 21.13  | -3.73  | FALSE | TRUE  | TRUE  |
| 1231 | Q9NSE4 | Isoleucine--tRNA ligase, mitochondrial          | MITOCHONDRIA | 38.16  | -8.36  | FALSE | TRUE  | TRUE  |
| 1232 | O95336 | 6-phosphogluconolactonase                       | CYTOSOL      | 19.10  | 24.50  | FALSE | TRUE  | FALSE |
| 1233 | Q9Y2R4 | Probable ATP-dependent RNA helicase             | NUCLEUS      | -0.20  | -40.08 | FALSE | TRUE  | FALSE |
| 1234 | Q00535 | Cyclin-dependent-like kinase 5                  | unknown      | -11.95 | 14.57  | FALSE | TRUE  | FALSE |
| 1235 | Q9Y5K5 | Ubiquitin carboxyl-terminal hydrolase           | NUCLEUS      | -14.91 | -28.63 | FALSE | TRUE  | TRUE  |
| 1236 | Q9NYY8 | FAST kinase domain-containing protein           | MITOCHONDRIA | 42.93  | -13.95 | FALSE | TRUE  | TRUE  |
| 1237 | O75822 | Eukaryotic translation initiation factor        | unknown      | 13.41  | -10.96 | FALSE | TRUE  | TRUE  |
| 1238 | Q9H9Y6 | DNA-directed RNA polymerase I subunit           | NUCLEUS      | -24.73 | -26.12 | FALSE | TRUE  | TRUE  |
| 1239 | Q15165 | Serum paraoxonase/arylesterase 2                | unknown      | 3.24   | 33.76  | FALSE | TRUE  | TRUE  |
| 1240 | Q53EL6 | Programmed cell death protein 4                 | unknown      | 14.13  | -10.74 | TRUE  | TRUE  | TRUE  |
| 1241 | Q99567 | Nuclear pore complex protein Nup80              | unknown      | -6.70  | -22.66 | TRUE  | TRUE  | TRUE  |
| 1242 | O43324 | Eukaryotic translation elongation factor        | unknown      | 5.70   | -3.29  | FALSE | TRUE  | TRUE  |
| 1243 | Q9Y4W2 | Ribosomal biogenesis protein LAS1               | NUCLEUS      | 0.83   | -34.63 | FALSE | TRUE  | TRUE  |
| 1244 | Q9H845 | Acyl-CoA dehydrogenase family member            | MITOCHONDRIA | 37.88  | -14.34 | FALSE | TRUE  | TRUE  |
| 1245 | Q9UHB9 | Signal recognition particle subunit S           | unknown      | 5.34   | -4.02  | FALSE | TRUE  | TRUE  |
| 1246 | Q00688 | Peptidyl-prolyl cis-trans isomerase I           | RIBOSOME 60S | 16.32  | -22.03 | FALSE | TRUE  | TRUE  |
| 1247 | P04183 | Thymidine kinase, cytosolic                     | unknown      | -3.27  | -8.31  | FALSE | TRUE  | TRUE  |
| 1248 | P48637 | Glutathione synthetase                          | CYTOSOL      | 15.34  | 19.91  | FALSE | TRUE  | TRUE  |
| 1249 | Q9BSH4 | Translational activator of cytochrome           | unknown      | 35.12  | -1.79  | FALSE | TRUE  | FALSE |
| 1250 | Q9NR45 | Sialic acid synthase                            | CYTOSOL      | 20.42  | 9.45   | FALSE | TRUE  | FALSE |

|      |        |                                       |              |        |        |       |      |       |
|------|--------|---------------------------------------|--------------|--------|--------|-------|------|-------|
| 1251 | O95163 | Elongator complex protein 1           | unknown      | 14.57  | 8.19   | FALSE | TRUE | TRUE  |
| 1252 | O15121 | Sphingolipid delta(4)-desaturase Df   | unknown      | -7.71  | 32.26  | FALSE | TRUE | FALSE |
| 1253 | Q86XP3 | ATP-dependent RNA helicase DDX4       | NUCLEUS      | -7.22  | -29.68 | TRUE  | TRUE | TRUE  |
| 1254 | O60749 | Sorting nexin-2                       | unknown      | -10.88 | 16.58  | TRUE  | TRUE | TRUE  |
| 1255 | O00186 | Syntaxin-binding protein 3            | unknown      | -21.12 | 18.15  | TRUE  | TRUE | TRUE  |
| 1256 | O15498 | Synaptobrevin homolog YKT6            | unknown      | 3.74   | 9.81   | TRUE  | TRUE | TRUE  |
| 1257 | O75616 | GTPase Era, mitochondrial             | MITOCHONDRIA | 35.96  | -14.16 | FALSE | TRUE | TRUE  |
| 1258 | Q9NX20 | 39S ribosomal protein L16, mitocho    | MITOCHONDRIA | 43.14  | -5.62  | FALSE | TRUE | FALSE |
| 1259 | P02794 | Ferritin heavy chain                  | unknown      | -36.38 | 8.89   | FALSE | TRUE | TRUE  |
| 1260 | Q9UBS4 | DnaJ homolog subfamily B member       | ER           | -5.29  | 35.10  | FALSE | TRUE | TRUE  |
| 1261 | O43290 | U4/U6.U5 tri-snRNP-associated pro     | NUCLEUS      | 3.08   | -33.52 | TRUE  | TRUE | TRUE  |
| 1262 | Q96E11 | Ribosome-recycling factor, mitocho    | unknown      | 43.12  | -2.53  | FALSE | TRUE | TRUE  |
| 1263 | Q9P289 | Serine/threonine-protein kinase 26    | unknown      | 1.69   | 10.76  | FALSE | TRUE | TRUE  |
| 1264 | P13798 | Acylamino-acid-releasing enzyme       | CYTOSOL      | 14.84  | 18.99  | FALSE | TRUE | FALSE |
| 1265 | O00203 | AP-3 complex subunit beta-1           | unknown      | -12.93 | 3.51   | FALSE | TRUE | TRUE  |
| 1266 | P24928 | DNA-directed RNA polymerase II su     | NUCLEUS      | -17.72 | -28.31 | FALSE | TRUE | TRUE  |
| 1267 | O94979 | Protein transport protein Sec31A      | unknown      | 8.58   | -13.69 | FALSE | TRUE | TRUE  |
| 1268 | P63279 | SUMO-conjugating enzyme UBC9          | NUCLEUS      | -3.95  | -15.89 | FALSE | TRUE | TRUE  |
| 1269 | P14735 | Insulin-degrading enzyme              | unknown      | 9.60   | 8.61   | FALSE | TRUE | TRUE  |
| 1270 | Q06203 | Amidophosphoribosyltransferase        | unknown      | 14.74  | 17.61  | FALSE | TRUE | TRUE  |
| 1271 | P09525 | Annexin A4                            | unknown      | 13.76  | 18.13  | FALSE | TRUE | TRUE  |
| 1272 | Q9HAV7 | GrpE protein homolog 1, mitochond     | unknown      | 44.83  | -12.50 | FALSE | TRUE | TRUE  |
| 1273 | Q9NVJ2 | ADP-ribosylation factor-like protein  | unknown      | -41.10 | 9.13   | FALSE | TRUE | TRUE  |
| 1274 | Q9H2G2 | STE20-like serine/threonine-protein   | unknown      | 1.45   | 10.53  | TRUE  | TRUE | TRUE  |
| 1275 | Q8IV08 | Phospholipase D3                      | unknown      | -40.79 | 8.40   | FALSE | TRUE | FALSE |
| 1276 | P14324 | Farnesyl pyrophosphate synthase       | CYTOSOL      | 17.34  | 15.07  | FALSE | TRUE | TRUE  |
| 1277 | Q13561 | Dynactin subunit 2                    | unknown      | 10.25  | 1.89   | FALSE | TRUE | TRUE  |
| 1278 | P63165 | Small ubiquitin-related modifier 1    | NUCLEUS      | -20.53 | -32.93 | TRUE  | TRUE | FALSE |
| 1279 | Q13618 | Cullin-3                              | NUCLEUS      | -2.47  | -13.17 | FALSE | TRUE | TRUE  |
| 1280 | Q16555 | Dihydropyrimidinase-related protei    | unknown      | 9.12   | 18.47  | FALSE | TRUE | TRUE  |
| 1281 | P48507 | Glutamate--cysteine ligase regulato   | unknown      | 15.60  | 7.67   | FALSE | TRUE | TRUE  |
| 1282 | P08133 | Annexin A6                            | unknown      | 9.24   | 13.94  | FALSE | TRUE | TRUE  |
| 1283 | Q9Y314 | Nitric oxide synthase-interacting pro | NUCLEUS      | -3.85  | -16.40 | FALSE | TRUE | TRUE  |
| 1284 | Q8WVX9 | Fatty acyl-CoA reductase 1            | PEROXISOME   | 53.02  | -3.56  | FALSE | TRUE | FALSE |
| 1285 | Q13564 | NEDD8-activating enzyme E1 regul      | unknown      | 25.02  | 18.68  | FALSE | TRUE | TRUE  |
| 1286 | Q96FJ2 | Dynein light chain 2, cytoplasmic     | NUCLEUS      | -11.17 | -17.88 | FALSE | TRUE | TRUE  |
| 1287 | Q9H0U3 | Magnesium transporter protein 1       | unknown      | 6.67   | 35.06  | FALSE | TRUE | TRUE  |
| 1288 | Q9NVI7 | ATPase family AAA domain-contain      | MITOCHONDRIA | 29.73  | -11.69 | FALSE | TRUE | TRUE  |

|      |        |                                        |              |        |        |       |      |       |
|------|--------|----------------------------------------|--------------|--------|--------|-------|------|-------|
| 1289 | Q14914 | Prostaglandin reductase 1              | unknown      | 24.00  | 22.53  | FALSE | TRUE | TRUE  |
| 1290 | Q9Y2B0 | Protein canopy homolog 2               | ER           | -4.55  | 36.48  | FALSE | TRUE | TRUE  |
| 1291 | Q99439 | Calponin-2                             | unknown      | 3.93   | 3.83   | TRUE  | TRUE | TRUE  |
| 1292 | Q86TI2 | Dipeptidyl peptidase 9                 | unknown      | 4.96   | -0.11  | FALSE | TRUE | TRUE  |
| 1293 | Q9BW27 | Nuclear pore complex protein Nup8      | NUCLEUS      | -19.63 | -29.81 | FALSE | TRUE | TRUE  |
| 1294 | P50213 | Isocitrate dehydrogenase [NAD] su      | MITOCHONDRIA | 41.50  | -7.48  | FALSE | TRUE | TRUE  |
| 1295 | Q15070 | Mitochondrial inner membrane pro       | MITOCHONDRIA | 35.23  | -15.49 | FALSE | TRUE | TRUE  |
| 1296 | Q5SY16 | Polynucleotide 5'-hydroxyl-kinase M    | NUCLEUS      | 0.59   | -34.55 | FALSE | TRUE | FALSE |
| 1297 | Q9NYK5 | 39S ribosomal protein L39, mitoch      | MITOCHONDRIA | 41.87  | -11.54 | FALSE | TRUE | TRUE  |
| 1298 | Q9Y2P8 | RNA 3'-terminal phosphate cyclase-     | NUCLEUS      | -2.30  | -39.64 | FALSE | TRUE | TRUE  |
| 1299 | P48739 | Phosphatidylinositol transfer protein  | unknown      | 21.35  | 14.68  | FALSE | TRUE | TRUE  |
| 1300 | P10606 | Cytochrome c oxidase subunit 5B, m     | MITOCHONDRIA | 33.73  | -11.27 | FALSE | TRUE | TRUE  |
| 1301 | P36404 | ADP-ribosylation factor-like protein   | unknown      | 19.85  | -2.86  | FALSE | TRUE | FALSE |
| 1302 | P22059 | Oxysterol-binding protein 1            | unknown      | 2.29   | 9.82   | FALSE | TRUE | TRUE  |
| 1303 | P14923 | Junction plakoglobin                   | PM           | -26.54 | 5.99   | TRUE  | TRUE | TRUE  |
| 1304 | P01130 | Low-density lipoprotein receptor       | unknown      | -34.17 | 8.07   | FALSE | TRUE | TRUE  |
| 1305 | O95453 | Poly(A)-specific ribonuclease PARN     | NUCLEUS      | -17.49 | -29.46 | FALSE | TRUE | TRUE  |
| 1306 | Q9GZR2 | RNA exonuclease 4                      | NUCLEUS      | -0.86  | -38.50 | FALSE | TRUE | TRUE  |
| 1307 | Q13131 | 5'-AMP-activated protein kinase ca     | unknown      | 6.75   | 8.33   | FALSE | TRUE | FALSE |
| 1308 | P18858 | DNA ligase 1                           | unknown      | 16.18  | 2.90   | TRUE  | TRUE | TRUE  |
| 1309 | Q9Y221 | 60S ribosome subunit biogenesis pr     | NUCLEUS      | -3.47  | -35.54 | FALSE | TRUE | FALSE |
| 1310 | Q969S3 | Zinc finger protein 622                | unknown      | 3.25   | -18.25 | FALSE | TRUE | TRUE  |
| 1311 | Q6P1A2 | Lysophospholipid acyltransferase 5     | unknown      | 0.04   | 32.84  | FALSE | TRUE | TRUE  |
| 1312 | Q9NZB2 | Constitutive coactivator of PPAR-ga    | unknown      | -0.05  | -22.64 | TRUE  | TRUE | TRUE  |
| 1313 | Q9UGP8 | Translocation protein SEC63 homolo     | ER           | 4.39   | 37.18  | FALSE | TRUE | TRUE  |
| 1314 | Q9NR09 | Baculoviral IAP repeat-containing p    | unknown      | 8.76   | 1.93   | TRUE  | TRUE | TRUE  |
| 1315 | Q5T653 | 39S ribosomal protein L2, mitochon     | MITOCHONDRIA | 38.95  | -4.40  | FALSE | TRUE | TRUE  |
| 1316 | Q03135 | Caveolin-1                             | unknown      | -19.57 | 16.07  | FALSE | TRUE | TRUE  |
| 1317 | Q8WXX5 | DnaJ homolog subfamily C member        | unknown      | -12.64 | -8.35  | FALSE | TRUE | TRUE  |
| 1318 | O00178 | GTP-binding protein 1                  | unknown      | 5.12   | -18.44 | FALSE | TRUE | FALSE |
| 1319 | Q9Y696 | Chloride intracellular channel protei  | unknown      | 2.37   | 11.58  | FALSE | TRUE | TRUE  |
| 1320 | Q15796 | Mothers against decapentaplegic h      | unknown      | -1.36  | -12.75 | FALSE | TRUE | FALSE |
| 1321 | Q9NVH1 | DnaJ homolog subfamily C member        | unknown      | 27.78  | -13.06 | FALSE | TRUE | TRUE  |
| 1322 | Q9UH17 | DNA dC->dU-editing enzyme APOB         | NUCLEUS      | -10.79 | -36.51 | FALSE | TRUE | FALSE |
| 1323 | Q9HC21 | Mitochondrial thiamine pyrophosph      | MITOCHONDRIA | 34.42  | -13.56 | FALSE | TRUE | FALSE |
| 1324 | Q9UBQ5 | Eukaryotic translation initiation fact | unknown      | 14.34  | -10.63 | FALSE | TRUE | FALSE |
| 1325 | O00743 | Serine/threonine-protein phosphat      | unknown      | 13.92  | 12.35  | FALSE | TRUE | TRUE  |
| 1326 | Q9UHI6 | Probable ATP-dependent RNA helic       | NUCLEUS      | -0.86  | -22.46 | FALSE | TRUE | TRUE  |

|      |        |                                        |              |        |        |       |       |       |
|------|--------|----------------------------------------|--------------|--------|--------|-------|-------|-------|
| 1327 | O60313 | Dynamin-like 120 kDa protein, mitc     | MITOCHONDRIA | 35.35  | -5.03  | FALSE | TRUE  | TRUE  |
| 1328 | Q9Y3C6 | Peptidyl-prolyl cis-trans isomerase-   | NUCLEUS      | -9.98  | -30.59 | FALSE | TRUE  | TRUE  |
| 1329 | Q9NR12 | PDZ and LIM domain protein 7           | unknown      | -6.22  | -1.14  | TRUE  | TRUE  | FALSE |
| 1330 | P78310 | Coxsackievirus and adenovirus rece     | PM           | -28.38 | 7.62   | TRUE  | FALSE | TRUE  |
| 1331 | Q9Y673 | Dolichyl-phosphate beta-glucosyltra    | ER           | -3.19  | 33.01  | FALSE | TRUE  | FALSE |
| 1332 | Q9BYD1 | 39S ribosomal protein L13, mitoch      | MITOCHONDRIA | 43.00  | -6.10  | FALSE | TRUE  | FALSE |
| 1333 | P24539 | ATP synthase F(0) complex subunit      | MITOCHONDRIA | 37.00  | -14.31 | FALSE | TRUE  | TRUE  |
| 1334 | Q7L5N1 | COP9 signalosome complex subunit       | unknown      | 17.96  | 13.45  | FALSE | TRUE  | FALSE |
| 1335 | P61009 | Signal peptidase complex subunit 3     | ER           | 5.86   | 36.43  | FALSE | TRUE  | TRUE  |
| 1336 | P53701 | Cytochrome c-type heme lyase           | unknown      | 39.69  | -12.64 | FALSE | TRUE  | TRUE  |
| 1337 | Q9BZZ5 | Apoptosis inhibitor 5                  | NUCLEUS      | -11.05 | -23.69 | FALSE | TRUE  | TRUE  |
| 1338 | Q13637 | Ras-related protein Rab-32             | unknown      | -11.86 | 20.35  | FALSE | TRUE  | TRUE  |
| 1339 | O60563 | Cyclin-T1                              | NUCLEUS      | 3.99   | -31.45 | FALSE | TRUE  | TRUE  |
| 1340 | Q14677 | Clathrin interactor 1                  | unknown      | -13.78 | 27.80  | TRUE  | TRUE  | TRUE  |
| 1341 | O43292 | Glycosylphosphatidylinositol ancho     | ER           | -4.48  | 27.25  | FALSE | TRUE  | FALSE |
| 1342 | A3KMH1 | von Willebrand factor A domain-co      | MITOCHONDRIA | 32.64  | -12.22 | TRUE  | TRUE  | TRUE  |
| 1343 | Q92643 | GPI-anchor transamidase                | ER           | 2.00   | 32.63  | FALSE | TRUE  | FALSE |
| 1344 | O75521 | Enoyl-CoA delta isomerase 2, mitoc     | PEROXISOME   | 51.80  | -3.77  | FALSE | TRUE  | TRUE  |
| 1345 | Q9Y450 | HBS1-like protein                      | NUCLEUS      | -0.98  | -5.15  | TRUE  | TRUE  | TRUE  |
| 1346 | Q8TEX9 | Importin-4                             | unknown      | 13.91  | 9.49   | FALSE | TRUE  | FALSE |
| 1347 | Q13546 | Receptor-interacting serine/threoni    | unknown      | 11.18  | 2.19   | FALSE | TRUE  | TRUE  |
| 1348 | Q14146 | Unhealthy ribosome biogenesis pro      | NUCLEUS      | -0.96  | -39.01 | FALSE | TRUE  | TRUE  |
| 1349 | Q9Y2W1 | Thyroid hormone receptor-associat      | NUCLEUS      | -2.10  | -25.70 | TRUE  | TRUE  | TRUE  |
| 1350 | Q9BT22 | Chitobiosyldiphosphodolichol beta-     | ER           | -6.93  | 33.45  | FALSE | TRUE  | TRUE  |
| 1351 | P11233 | Ras-related protein Ral-A              | PM           | -26.43 | 13.24  | TRUE  | TRUE  | TRUE  |
| 1352 | O60256 | Phosphoribosyl pyrophosphate syn       | unknown      | 4.75   | -0.41  | FALSE | TRUE  | TRUE  |
| 1353 | Q15031 | Probable leucine--tRNA ligase, mito    | MITOCHONDRIA | 41.24  | -9.13  | FALSE | TRUE  | TRUE  |
| 1354 | Q9BRX2 | Protein pelota homolog                 | unknown      | -4.08  | -10.21 | FALSE | TRUE  | TRUE  |
| 1355 | Q8N6H7 | ADP-ribosylation factor GTPase-act     | NUCLEUS      | -10.39 | -16.21 | TRUE  | TRUE  | FALSE |
| 1356 | P06730 | Eukaryotic translation initiation fact | unknown      | 9.94   | -3.31  | FALSE | TRUE  | TRUE  |
| 1357 | P49419 | Alpha-aminoadipic semialdehyde d       | unknown      | 22.23  | -3.89  | FALSE | TRUE  | TRUE  |
| 1358 | Q96L92 | Sorting nexin-27                       | unknown      | -10.59 | 9.83   | FALSE | TRUE  | TRUE  |
| 1359 | O60343 | TBC1 domain family member 4            | unknown      | 1.38   | -1.70  | FALSE | TRUE  | TRUE  |
| 1360 | P10586 | Receptor-type tyrosine-protein pho     | PM           | -24.25 | 12.38  | FALSE | TRUE  | TRUE  |
| 1361 | P54105 | Methylosome subunit pICln              | CYTOSOL      | 18.18  | 21.81  | FALSE | TRUE  | TRUE  |
| 1362 | P17301 | Integrin alpha-2                       | PM           | -23.17 | 16.65  | TRUE  | TRUE  | TRUE  |
| 1363 | Q99661 | Kinesin-like protein KIF2C             | unknown      | -14.98 | -17.08 | FALSE | TRUE  | TRUE  |
| 1364 | P01111 | GTPase NRas                            | unknown      | -28.94 | 1.81   | FALSE | TRUE  | TRUE  |

|      |        |                                         |                   |        |        |       |      |       |
|------|--------|-----------------------------------------|-------------------|--------|--------|-------|------|-------|
| 1365 | Q16795 | NADH dehydrogenase [ubiquinone]         | MITOCHONDRIA      | 30.72  | -14.88 | FALSE | TRUE | FALSE |
| 1366 | P42126 | Enoyl-CoA delta isomerase 1, mitoc      | MITOCHONDRIA      | 32.51  | -8.66  | FALSE | TRUE | FALSE |
| 1367 | Q01581 | Hydroxymethylglutaryl-CoA syntha        | CYTOSOL           | 24.06  | 23.47  | FALSE | TRUE | TRUE  |
| 1368 | Q5BKZ1 | DBIRD complex subunit ZNF326            | NUCLEUS           | -11.05 | -36.28 | FALSE | TRUE | TRUE  |
| 1369 | O75152 | Zinc finger CCCH domain-containing      | unknown           | -11.15 | -23.37 | TRUE  | TRUE | TRUE  |
| 1370 | Q9NWU5 | 39S ribosomal protein L22, mitoch       | MITOCHONDRIA      | 43.11  | -5.92  | FALSE | TRUE | TRUE  |
| 1371 | Q15459 | Splicing factor 3A subunit 1            | NUCLEUS           | 5.01   | -34.84 | TRUE  | TRUE | TRUE  |
| 1372 | Q9Y3D6 | Mitochondrial fission 1 protein         | unknown           | -0.19  | 23.86  | FALSE | TRUE | TRUE  |
| 1373 | Q15785 | Mitochondrial import receptor subu      | unknown           | 6.95   | -6.08  | FALSE | TRUE | TRUE  |
| 1374 | P15374 | Ubiquitin carboxyl-terminal hydrola     | CYTOSOL           | 23.78  | 24.10  | FALSE | TRUE | TRUE  |
| 1375 | Q9BWD1 | Acetyl-CoA acetyltransferase, cytos     | CYTOSOL           | 19.09  | 23.46  | FALSE | TRUE | TRUE  |
| 1376 | Q14C86 | GTPase-activating protein and VPS       | unknown           | 8.75   | 5.13   | TRUE  | TRUE | TRUE  |
| 1377 | P14854 | Cytochrome c oxidase subunit 6B1        | unknown           | 29.27  | -7.73  | FALSE | TRUE | TRUE  |
| 1378 | Q6IBS0 | Twinfilin-2                             | unknown           | 9.64   | 4.97   | FALSE | TRUE | FALSE |
| 1379 | P18031 | Tyrosine-protein phosphatase non-       | ER                | 1.81   | 33.82  | TRUE  | TRUE | TRUE  |
| 1380 | Q96TA1 | Niban-like protein 1                    | unknown           | 0.17   | 10.25  | TRUE  | TRUE | TRUE  |
| 1381 | Q9NW64 | Pre-mRNA-splicing factor RBM22          | NUCLEUS           | -2.94  | -39.09 | TRUE  | TRUE | TRUE  |
| 1382 | P35251 | Replication factor C subunit 1          | NUCLEUS-CHROMATIN | -21.93 | -15.19 | TRUE  | TRUE | TRUE  |
| 1383 | Q5M775 | Cytospin-B                              | unknown           | -18.33 | 14.79  | TRUE  | TRUE | TRUE  |
| 1384 | O75116 | Rho-associated protein kinase 2         | unknown           | -9.13  | 11.47  | TRUE  | TRUE | TRUE  |
| 1385 | Q9NY93 | Probable ATP-dependent RNA helic        | NUCLEUS           | -0.50  | -37.76 | FALSE | TRUE | TRUE  |
| 1386 | P17174 | Aspartate aminotransferase, cytopl      | CYTOSOL           | 20.24  | 24.75  | FALSE | TRUE | TRUE  |
| 1387 | Q01085 | Nucleolysin TIAR                        | NUCLEUS           | -20.32 | -32.91 | FALSE | TRUE | TRUE  |
| 1388 | P11169 | Solute carrier family 2, facilitated gl | PM                | -24.99 | 8.74   | FALSE | TRUE | TRUE  |
| 1389 | Q9Y606 | tRNA pseudouridine synthase A           | MITOCHONDRIA      | 33.40  | -5.95  | FALSE | TRUE | FALSE |
| 1390 | Q15629 | Translocating chain-associated mer      | unknown           | 5.37   | 38.41  | FALSE | TRUE | TRUE  |
| 1391 | O43847 | Nardilysin                              | CYTOSOL           | 18.00  | 16.41  | FALSE | TRUE | TRUE  |
| 1392 | P43121 | Cell surface glycoprotein MUC18         | PM                | -27.03 | 9.83   | TRUE  | TRUE | TRUE  |
| 1393 | Q9NPD3 | Exosome complex component RRP4          | NUCLEUS           | -7.61  | -24.51 | FALSE | TRUE | TRUE  |
| 1394 | P56199 | Integrin alpha-1                        | PM                | -25.47 | 9.47   | TRUE  | TRUE | TRUE  |
| 1395 | Q6WKZ4 | Rab11 family-interacting protein 1      | unknown           | -21.61 | 5.50   | TRUE  | TRUE | TRUE  |
| 1396 | Q96I24 | Far upstream element-binding prot       | NUCLEUS           | -12.60 | -35.96 | TRUE  | TRUE | TRUE  |
| 1397 | Q9Y6G9 | Cytoplasmic dynein 1 light intermec     | unknown           | -11.32 | -7.40  | TRUE  | TRUE | TRUE  |
| 1398 | P62487 | DNA-directed RNA polymerase II su       | NUCLEUS           | -16.76 | -29.54 | FALSE | TRUE | FALSE |
| 1399 | P61964 | WD repeat-containing protein 5          | unknown           | -15.92 | -22.68 | FALSE | TRUE | TRUE  |
| 1400 | O00592 | Podocalyxin                             | unknown           | -28.60 | 7.13   | TRUE  | TRUE | TRUE  |
| 1401 | Q9BXB5 | Oxysterol-binding protein-related p     | unknown           | -7.02  | 3.83   | TRUE  | TRUE | TRUE  |
| 1402 | Q9NVM9 | Integrator complex subunit 13           | NUCLEUS           | -16.05 | -21.89 | FALSE | TRUE | TRUE  |

|      |        |                                            |                   |        |        |       |       |       |
|------|--------|--------------------------------------------|-------------------|--------|--------|-------|-------|-------|
| 1403 | O00566 | U3 small nucleolar ribonucleoprotein       | NUCLEUS           | -0.64  | -40.52 | FALSE | TRUE  | TRUE  |
| 1404 | P61966 | AP-1 complex subunit sigma-1A              | unknown           | -33.39 | 19.53  | FALSE | TRUE  | TRUE  |
| 1405 | Q9NUJ1 | Mycophenolic acid acyl-glucuronide         | MITOCHONDRIA      | 43.44  | -7.14  | FALSE | TRUE  | TRUE  |
| 1406 | O60216 | Double-strand-break repair protein         | NUCLEUS-CHROMATIN | -18.40 | -16.08 | FALSE | TRUE  | TRUE  |
| 1407 | Q71RC2 | La-related protein 4                       | unknown           | 6.83   | -18.79 | TRUE  | TRUE  | TRUE  |
| 1408 | Q9BUL8 | Programmed cell death protein 10           | unknown           | 1.39   | 10.63  | FALSE | TRUE  | TRUE  |
| 1409 | A3KN83 | Protein strawberry notch homolog 1         | NUCLEUS           | -9.17  | -13.82 | FALSE | TRUE  | TRUE  |
| 1410 | Q92552 | 28S ribosomal protein S27, mitochondrion   | unknown           | 35.77  | -2.37  | FALSE | TRUE  | TRUE  |
| 1411 | P51151 | Ras-related protein Rab-9A                 | PM                | -22.04 | 14.23  | FALSE | TRUE  | FALSE |
| 1412 | Q7KZN9 | Cytochrome c oxidase assembly protein      | MITOCHONDRIA      | 35.30  | -15.13 | FALSE | TRUE  | FALSE |
| 1413 | Q9NQW6 | Anillin                                    | unknown           | -10.57 | -10.09 | TRUE  | TRUE  | TRUE  |
| 1414 | Q13868 | Exosome complex component RRP4             | NUCLEUS           | -10.72 | -26.21 | FALSE | TRUE  | FALSE |
| 1415 | O95202 | Mitochondrial proton/calcium exchanger     | MITOCHONDRIA      | 37.01  | -9.77  | FALSE | TRUE  | TRUE  |
| 1416 | Q96A26 | Protein FAM162A                            | MITOCHONDRIA      | 35.85  | -11.05 | FALSE | TRUE  | TRUE  |
| 1417 | Q9BXP5 | Serrate RNA effector molecule homolog      | unknown           | -15.70 | -31.24 | TRUE  | TRUE  | TRUE  |
| 1418 | Q9P0V9 | Septin-10                                  | unknown           | -1.91  | 4.51   | FALSE | TRUE  | TRUE  |
| 1419 | O15084 | Serine/threonine-protein phosphatase       | unknown           | 9.88   | 5.18   | FALSE | TRUE  | FALSE |
| 1420 | Q6P158 | Putative ATP-dependent RNA helicase        | unknown           | 7.97   | -20.71 | FALSE | TRUE  | TRUE  |
| 1421 | P55010 | Eukaryotic translation initiation factor   | unknown           | 18.13  | 10.06  | FALSE | TRUE  | TRUE  |
| 1422 | Q96SU4 | Oxysterol-binding protein-related protein  | unknown           | -0.25  | 9.43   | FALSE | TRUE  | TRUE  |
| 1423 | Q9NZL4 | Hsp70-binding protein 1                    | unknown           | 21.56  | 17.33  | FALSE | TRUE  | TRUE  |
| 1424 | P61927 | 60S ribosomal protein L37                  | RIBOSOME 60S      | 15.77  | -19.32 | TRUE  | FALSE | TRUE  |
| 1425 | O95071 | E3 ubiquitin-protein ligase UBR5           | unknown           | 21.28  | 11.28  | FALSE | TRUE  | TRUE  |
| 1426 | Q9NP92 | 39S ribosomal protein S30, mitochondrion   | unknown           | 41.50  | -13.92 | FALSE | TRUE  | TRUE  |
| 1427 | P51553 | Isocitrate dehydrogenase [NAD] subunit     | MITOCHONDRIA      | 37.42  | -4.05  | FALSE | TRUE  | FALSE |
| 1428 | O60869 | Endothelial differentiation-related factor | unknown           | 8.25   | -21.79 | TRUE  | TRUE  | FALSE |
| 1429 | P61201 | COP9 signalosome complex subunit           | unknown           | 17.06  | 8.07   | FALSE | TRUE  | FALSE |
| 1430 | Q04206 | Transcription factor p65                   | unknown           | 15.45  | 5.62   | FALSE | TRUE  | TRUE  |
| 1431 | Q9Y2Q3 | Glutathione S-transferase kappa 1          | PEROXISOME        | 53.10  | -3.70  | FALSE | TRUE  | TRUE  |
| 1432 | P78362 | SRSF protein kinase 2                      | unknown           | 6.67   | -24.62 | FALSE | TRUE  | TRUE  |
| 1433 | Q9Y3A4 | Ribosomal RNA-processing protein           | NUCLEUS           | -0.42  | -41.16 | FALSE | TRUE  | FALSE |
| 1434 | O14646 | Chromodomain-helicase-DNA-binding          | NUCLEUS           | -22.79 | -23.55 | FALSE | TRUE  | TRUE  |
| 1435 | Q15428 | Splicing factor 3A subunit 2               | NUCLEUS           | 5.00   | -34.83 | FALSE | TRUE  | FALSE |
| 1436 | Q8NE86 | Calcium uniporter protein, mitochondrion   | MITOCHONDRIA      | 30.31  | -14.59 | FALSE | TRUE  | TRUE  |
| 1437 | Q96G03 | Phosphoglucosyltransferase-2               | unknown           | 25.26  | 21.78  | FALSE | TRUE  | TRUE  |
| 1438 | Q9H078 | Caseinolytic peptidase B protein homolog   | MITOCHONDRIA      | 34.63  | -11.51 | FALSE | TRUE  | TRUE  |
| 1439 | Q96I51 | RCC1-like G exchanging factor-like protein | MITOCHONDRIA      | 34.82  | -8.32  | FALSE | TRUE  | TRUE  |
| 1440 | Q9H0D6 | 5'-3' exoribonuclease 2                    | NUCLEUS           | -6.79  | -31.32 | FALSE | TRUE  | TRUE  |

|      |        |                                       |              |        |        |       |       |       |
|------|--------|---------------------------------------|--------------|--------|--------|-------|-------|-------|
| 1441 | P00390 | Glutathione reductase, mitochondri    | unknown      | 6.96   | -3.47  | FALSE | TRUE  | TRUE  |
| 1442 | Q6IA86 | Elongator complex protein 2           | unknown      | 15.26  | 5.99   | FALSE | TRUE  | TRUE  |
| 1443 | Q8NBM4 | Ubiquitin-associated domain-contai    | ER           | -9.53  | 30.80  | FALSE | TRUE  | TRUE  |
| 1444 | Q9UJZ1 | Stomatin-like protein 2, mitochondr   | MITOCHONDRIA | 35.88  | -8.71  | FALSE | TRUE  | TRUE  |
| 1445 | Q8WUY1 | Protein THEM6                         | ER           | -4.69  | 27.64  | FALSE | TRUE  | TRUE  |
| 1446 | P13995 | Bifunctional methylenetetrahydrofo    | MITOCHONDRIA | 42.36  | -6.24  | FALSE | TRUE  | TRUE  |
| 1447 | Q16643 | Drebrin                               | unknown      | 1.23   | 9.28   | TRUE  | TRUE  | TRUE  |
| 1448 | P20810 | Calpastatin                           | unknown      | 4.10   | -6.36  | TRUE  | TRUE  | TRUE  |
| 1449 | Q9NQW7 | Xaa-Pro aminopeptidase 1              | CYTOSOL      | 17.04  | 17.74  | FALSE | TRUE  | TRUE  |
| 1450 | Q16822 | Phosphoenolpyruvate carboxykina       | MITOCHONDRIA | 37.73  | -1.81  | FALSE | TRUE  | FALSE |
| 1451 | O14908 | PDZ domain-containing protein GIP     | unknown      | -14.10 | 14.72  | FALSE | TRUE  | TRUE  |
| 1452 | Q8TC12 | Retinol dehydrogenase 11              | ER           | -0.42  | 33.69  | FALSE | TRUE  | TRUE  |
| 1453 | O43813 | LanC-like protein 1                   | unknown      | -9.91  | 4.56   | FALSE | TRUE  | TRUE  |
| 1454 | Q99584 | Protein S100-A13                      | NUCLEUS      | -8.11  | -15.76 | FALSE | TRUE  | TRUE  |
| 1455 | Q96EK6 | Glucosamine 6-phosphate N-acetyl      | NUCLEUS      | -0.59  | -24.85 | FALSE | TRUE  | TRUE  |
| 1456 | P51809 | Vesicle-associated membrane prote     | unknown      | -39.00 | 7.90   | FALSE | TRUE  | TRUE  |
| 1457 | Q96BW9 | Phosphatidate cytidyltransferase,     | MITOCHONDRIA | 37.89  | -14.62 | FALSE | TRUE  | FALSE |
| 1458 | Q96CS3 | FAS-associated factor 2               | ER           | 1.52   | 33.27  | FALSE | TRUE  | FALSE |
| 1459 | P23193 | Transcription elongation factor A pr  | NUCLEUS      | -5.47  | -15.72 | FALSE | TRUE  | TRUE  |
| 1460 | Q9NRX4 | 14 kDa phosphohistidine phosphata     | CYTOSOL      | 10.44  | 20.98  | FALSE | TRUE  | TRUE  |
| 1461 | P09496 | Clathrin light chain A                | unknown      | -10.08 | 13.85  | FALSE | TRUE  | TRUE  |
| 1462 | Q13330 | Metastasis-associated protein MTA     | NUCLEUS      | -22.20 | -26.81 | FALSE | TRUE  | FALSE |
| 1463 | P62273 | 40S ribosomal protein S29             | RIBOSOME 40S | 11.00  | -24.40 | FALSE | TRUE  | TRUE  |
| 1464 | Q92905 | COP9 signalosome complex subunit      | unknown      | 21.78  | 9.89   | FALSE | TRUE  | TRUE  |
| 1465 | P06396 | Gelsolin                              | unknown      | 13.01  | 16.32  | FALSE | TRUE  | TRUE  |
| 1466 | Q9BS26 | Endoplasmic reticulum resident pro    | ER           | -3.87  | 33.82  | FALSE | TRUE  | TRUE  |
| 1467 | Q99459 | Cell division cycle 5-like protein    | NUCLEUS      | -2.92  | -32.30 | TRUE  | TRUE  | TRUE  |
| 1468 | Q14558 | Phosphoribosyl pyrophosphate syn      | unknown      | 0.00   | -5.79  | FALSE | TRUE  | FALSE |
| 1469 | Q9UNF1 | Melanoma-associated antigen D2        | unknown      | 11.30  | -2.86  | TRUE  | TRUE  | TRUE  |
| 1470 | O75165 | DnaJ homolog subfamily C member       | unknown      | -35.26 | 15.93  | FALSE | TRUE  | TRUE  |
| 1471 | Q12872 | Splicing factor, suppressor of white- | NUCLEUS      | 1.67   | -30.54 | TRUE  | TRUE  | TRUE  |
| 1472 | O43795 | Unconventional myosin-Ib              | unknown      | -9.76  | 25.23  | FALSE | TRUE  | FALSE |
| 1473 | Q00587 | Cdc42 effector protein 1              | unknown      | -7.30  | 10.42  | TRUE  | FALSE | TRUE  |
| 1474 | Q06136 | 3-ketodihydrosphingosine reductas     | unknown      | -10.02 | 28.71  | FALSE | TRUE  | FALSE |
| 1475 | Q96S97 | Myeloid-associated differentiation    | PM           | -28.17 | 1.48   | FALSE | TRUE  | TRUE  |
| 1476 | Q9Y4C2 | TRPM8 channel-associated factor 1     | unknown      | 4.36   | 2.83   | FALSE | TRUE  | TRUE  |
| 1477 | Q8NCW5 | NAD(P)H-hydrate epimerase             | unknown      | 19.80  | -2.94  | FALSE | TRUE  | FALSE |
| 1478 | Q9H1E3 | Nuclear ubiquitous casein and cyclir  | unknown      | 24.90  | 25.03  | FALSE | TRUE  | TRUE  |

|      |        |                                              |                   |        |        |       |      |       |
|------|--------|----------------------------------------------|-------------------|--------|--------|-------|------|-------|
| 1479 | O43395 | U4/U6 small nuclear ribonucleoprotein        | NUCLEUS           | 3.34   | -36.04 | FALSE | TRUE | TRUE  |
| 1480 | P61758 | Prefoldin subunit 3                          | unknown           | 21.93  | 23.42  | FALSE | TRUE | TRUE  |
| 1481 | Q8N357 | Solute carrier family 35 member F6           | unknown           | -37.40 | 13.86  | FALSE | TRUE | TRUE  |
| 1482 | Q03519 | Antigen peptide transporter 2                | unknown           | -6.22  | 32.73  | FALSE | TRUE | FALSE |
| 1483 | Q9Y224 | RNA transcription, translation and transport | unknown           | 5.63   | -25.04 | FALSE | TRUE | TRUE  |
| 1484 | Q10570 | Cleavage and polyadenylation specificity     | NUCLEUS           | -10.02 | -35.96 | FALSE | TRUE | TRUE  |
| 1485 | Q9NT62 | Ubiquitin-like-conjugating enzyme 1          | unknown           | 16.59  | 8.89   | FALSE | TRUE | TRUE  |
| 1486 | Q13630 | GDP-L-fucose synthase                        | CYTOSOL           | 19.14  | 24.43  | FALSE | TRUE | TRUE  |
| 1487 | Q9NP79 | Vacuolar protein sorting-associated          | unknown           | 14.56  | 12.64  | FALSE | TRUE | FALSE |
| 1488 | Q9UBB4 | Ataxin-10                                    | unknown           | 17.37  | 13.00  | FALSE | TRUE | TRUE  |
| 1489 | Q8TB61 | Adenosine 3'-phospho 5'-phosphoryl           | unknown           | -21.82 | 32.35  | FALSE | TRUE | TRUE  |
| 1490 | O75179 | Ankyrin repeat domain-containing protein     | unknown           | 5.11   | -19.10 | TRUE  | TRUE | TRUE  |
| 1491 | P49790 | Nuclear pore complex protein Nup1            | NUCLEUS           | -20.70 | -28.96 | TRUE  | TRUE | TRUE  |
| 1492 | P61421 | V-type proton ATPase subunit d 1             | unknown           | -40.53 | 9.64   | FALSE | TRUE | TRUE  |
| 1493 | Q9UJW0 | Dynactin subunit 4                           | unknown           | 9.45   | 1.36   | FALSE | TRUE | TRUE  |
| 1494 | Q6UWP7 | Lysocardiolipin acyltransferase 1            | unknown           | -8.26  | 31.01  | FALSE | TRUE | FALSE |
| 1495 | P21359 | Neurofibromin                                | unknown           | 2.60   | -11.72 | FALSE | TRUE | TRUE  |
| 1496 | P38432 | Coilin                                       | NUCLEUS           | -19.36 | -22.89 | TRUE  | TRUE | TRUE  |
| 1497 | Q9UBQ7 | Glyoxylate reductase/hydroxypyruvate         | unknown           | 20.46  | -3.19  | FALSE | TRUE | TRUE  |
| 1498 | Q9UKX7 | Nuclear pore complex protein Nup5            | unknown           | -16.10 | -31.27 | TRUE  | TRUE | TRUE  |
| 1499 | Q9Y3T9 | Nucleolar complex protein 2 homolog          | NUCLEUS           | 0.16   | -38.95 | TRUE  | TRUE | TRUE  |
| 1500 | O76003 | Glutaredoxin-3                               | CYTOSOL           | 23.64  | 21.51  | FALSE | TRUE | TRUE  |
| 1501 | Q99426 | Tubulin-folding cofactor B                   | unknown           | 23.49  | 23.66  | TRUE  | TRUE | TRUE  |
| 1502 | Q96G21 | U3 small nucleolar ribonucleoprotein         | NUCLEUS           | -1.11  | -40.23 | FALSE | TRUE | TRUE  |
| 1503 | P50552 | Vasodilator-stimulated phosphoprotein        | unknown           | -5.41  | 10.33  | TRUE  | TRUE | TRUE  |
| 1504 | Q99543 | DnaJ homolog subfamily C member              | NUCLEUS           | -0.73  | -22.40 | FALSE | TRUE | TRUE  |
| 1505 | Q14318 | Peptidyl-prolyl cis-trans isomerase I        | ER                | -5.20  | 32.66  | FALSE | TRUE | TRUE  |
| 1506 | O75419 | Cell division control protein 45 homolog     | unknown           | 4.51   | 2.78   | FALSE | TRUE | FALSE |
| 1507 | O15347 | High mobility group protein B3               | NUCLEUS           | -22.42 | -23.14 | FALSE | TRUE | TRUE  |
| 1508 | O00443 | Phosphatidylinositol 4-phosphate 3-          | unknown           | 8.14   | -20.54 | FALSE | TRUE | TRUE  |
| 1509 | Q9P0J0 | NADH dehydrogenase [ubiquinone]              | MITOCHONDRIA      | 30.66  | -11.04 | FALSE | TRUE | FALSE |
| 1510 | Q8TAD8 | Smad nuclear-interacting protein 1           | NUCLEUS           | -2.37  | -22.87 | FALSE | TRUE | TRUE  |
| 1511 | Q9UBU8 | Mortality factor 4-like protein 1            | NUCLEUS-CHROMATIN | -17.85 | -18.20 | FALSE | TRUE | TRUE  |
| 1512 | Q16850 | Lanosterol 14-alpha demethylase              | ER                | -7.21  | 32.66  | FALSE | TRUE | TRUE  |
| 1513 | O60701 | UDP-glucose 6-dehydrogenase                  | unknown           | 17.57  | 6.96   | FALSE | TRUE | TRUE  |
| 1514 | Q92620 | Pre-mRNA-splicing factor ATP-depende         | NUCLEUS           | -3.26  | -16.13 | FALSE | TRUE | TRUE  |
| 1515 | Q15024 | Exosome complex component RRP4               | NUCLEUS           | -10.67 | -26.23 | FALSE | TRUE | FALSE |
| 1516 | O00267 | Transcription elongation factor SPT4         | NUCLEUS           | -16.56 | -30.60 | FALSE | TRUE | TRUE  |



|      |        |                                                     |                   |        |        |       |      |       |
|------|--------|-----------------------------------------------------|-------------------|--------|--------|-------|------|-------|
| 1517 | P35221 | Catenin alpha-1                                     | PM                | -24.77 | 9.80   | FALSE | TRUE | TRUE  |
| 1518 | O60934 | Nibrin                                              | unknown           | -16.03 | -18.52 | FALSE | TRUE | TRUE  |
| 1519 | P61962 | DDB1- and CUL4-associated factor 7                  | NUCLEUS           | -0.13  | -22.49 | FALSE | TRUE | FALSE |
| 1520 | Q9NX63 | MICOS complex subunit MIC19                         | unknown           | 27.39  | -11.22 | FALSE | TRUE | TRUE  |
| 1521 | Q15043 | Zinc transporter ZIP14                              | unknown           | -35.14 | 16.28  | TRUE  | TRUE | TRUE  |
| 1522 | Q15257 | Serine/threonine-protein phosphatase 1B             | unknown           | 24.87  | 22.40  | FALSE | TRUE | TRUE  |
| 1523 | P53350 | Serine/threonine-protein kinase PLK1                | unknown           | -12.12 | -11.30 | FALSE | TRUE | TRUE  |
| 1524 | Q49A26 | Putative oxidoreductase GLYR1                       | NUCLEUS-CHROMATIN | -21.48 | -13.05 | FALSE | TRUE | FALSE |
| 1525 | Q5T6V5 | Queuosine salvage protein                           | unknown           | 24.01  | 23.76  | FALSE | TRUE | TRUE  |
| 1526 | P36639 | 7,8-dihydro-8-oxoguanine triphosphatase             | unknown           | 16.06  | 11.58  | FALSE | TRUE | TRUE  |
| 1527 | Q9Y619 | Mitochondrial ornithine transporter                 | MITOCHONDRIA      | 34.16  | -9.77  | FALSE | TRUE | FALSE |
| 1528 | O75663 | TIP41-like protein                                  | CYTOSOL           | 17.85  | 17.69  | FALSE | TRUE | TRUE  |
| 1529 | Q9UL46 | Proteasome activator complex subunit 1              | unknown           | 23.43  | 25.19  | FALSE | TRUE | TRUE  |
| 1530 | P13473 | Lysosome-associated membrane glycoprotein 2         | unknown           | -36.54 | 16.66  | FALSE | TRUE | FALSE |
| 1531 | P17252 | Protein kinase C alpha type 1                       | unknown           | 12.50  | 16.48  | FALSE | TRUE | FALSE |
| 1532 | Q8TED0 | U3 small nucleolar RNA-associated protein 1         | NUCLEUS           | -2.20  | -38.55 | FALSE | TRUE | FALSE |
| 1533 | Q9H2H8 | Peptidyl-prolyl cis-trans isomerase-1               | unknown           | 20.63  | 4.50   | FALSE | TRUE | FALSE |
| 1534 | P49841 | Glycogen synthase kinase-3 beta                     | unknown           | -9.22  | 8.65   | FALSE | TRUE | TRUE  |
| 1535 | Q8NBU5 | ATPase family AAA domain-containing protein 1       | unknown           | 32.84  | -14.49 | FALSE | TRUE | FALSE |
| 1536 | Q8WVV9 | Heterogeneous nuclear ribonucleoprotein A1          | NUCLEUS           | -12.41 | -28.91 | FALSE | TRUE | TRUE  |
| 1537 | Q9BWF3 | RNA-binding protein 4                               | NUCLEUS           | -18.65 | -31.99 | FALSE | TRUE | TRUE  |
| 1538 | Q8NEJ9 | Neuroguidin                                         | NUCLEUS           | -0.14  | -37.80 | FALSE | TRUE | TRUE  |
| 1539 | Q5SWX8 | Protein odr-4 homolog                               | unknown           | 2.25   | 34.12  | FALSE | TRUE | FALSE |
| 1540 | Q14331 | Protein FRG1                                        | NUCLEUS           | -7.06  | -20.15 | FALSE | TRUE | TRUE  |
| 1541 | Q9BUP3 | Oxidoreductase HTATIP2                              | ER                | 0.15   | 32.78  | FALSE | TRUE | TRUE  |
| 1542 | P36507 | Dual specificity mitogen-activated protein kinase 1 | unknown           | 14.71  | 9.06   | FALSE | TRUE | FALSE |
| 1543 | O00170 | AH receptor-interacting protein                     | unknown           | 16.49  | 10.02  | FALSE | TRUE | TRUE  |
| 1544 | Q9BTE3 | Mini-chromosome maintenance complex component 1     | unknown           | 18.64  | 7.89   | FALSE | TRUE | TRUE  |
| 1545 | O60306 | RNA helicase aquarius                               | NUCLEUS           | -3.63  | -39.06 | FALSE | TRUE | TRUE  |
| 1546 | Q16513 | Serine/threonine-protein kinase N2                  | unknown           | -8.60  | 10.94  | TRUE  | TRUE | FALSE |
| 1547 | Q08379 | Golgin subfamily A member 2                         | NUCLEUS           | -8.65  | -18.21 | TRUE  | TRUE | TRUE  |
| 1548 | Q8WYA6 | Beta-catenin-like protein 1                         | unknown           | 13.21  | -0.95  | FALSE | TRUE | TRUE  |
| 1549 | Q9Y6A4 | Cilia- and flagella-associated protein 1            | NUCLEUS           | -3.26  | -15.74 | FALSE | TRUE | TRUE  |
| 1550 | Q9BZF1 | Oxysterol-binding protein-related protein 1         | ER                | -1.91  | 35.51  | FALSE | TRUE | FALSE |
| 1551 | O15533 | Tapasin                                             | unknown           | -10.07 | 27.92  | FALSE | TRUE | FALSE |
| 1552 | O75691 | Small subunit processome component 1                | NUCLEUS           | -0.70  | -41.24 | FALSE | TRUE | TRUE  |
| 1553 | P29353 | SHC-transforming protein 1                          | unknown           | 19.14  | -3.46  | FALSE | TRUE | FALSE |
| 1554 | P34896 | Serine hydroxymethyltransferase, cytosolic          | unknown           | 12.48  | 2.82   | FALSE | TRUE | TRUE  |

|      |        |                                     |                   |        |        |       |       |       |
|------|--------|-------------------------------------|-------------------|--------|--------|-------|-------|-------|
| 1555 | O00217 | NADH dehydrogenase [ubiquinone]     | MITOCHONDRIA      | 30.75  | -11.10 | FALSE | TRUE  | TRUE  |
| 1556 | P17813 | Endoglin                            | PM                | -25.25 | 3.03   | FALSE | TRUE  | TRUE  |
| 1557 | Q9H9Q2 | COP9 signalosome complex subunit    | unknown           | 14.12  | 2.94   | FALSE | FALSE | TRUE  |
| 1558 | Q96C86 | m7GpppX diphosphatase               | unknown           | 26.74  | 23.47  | FALSE | TRUE  | TRUE  |
| 1559 | Q658Y4 | Protein FAM91A1                     | unknown           | -14.18 | 7.96   | FALSE | TRUE  | FALSE |
| 1560 | P78330 | Phosphoserine phosphatase           | unknown           | 19.34  | 21.78  | FALSE | TRUE  | FALSE |
| 1561 | O95989 | Diphosphoinositol polyphosphate p   | unknown           | 26.03  | 23.38  | FALSE | TRUE  | FALSE |
| 1562 | O43913 | Origin recognition complex subunit  | NUCLEUS-CHROMATIN | -19.05 | -15.67 | FALSE | TRUE  | FALSE |
| 1563 | Q9NRK6 | ATP-binding cassette sub-family B r | unknown           | 35.14  | -0.74  | FALSE | TRUE  | TRUE  |
| 1564 | O60287 | Nucleolar pre-ribosomal-associated  | NUCLEUS           | -3.57  | -37.12 | FALSE | TRUE  | FALSE |
| 1565 | O95861 | 3'(2'),5'-bisphosphate nucleotidase | unknown           | 18.45  | 15.25  | FALSE | TRUE  | TRUE  |
| 1566 | P06703 | Protein S100-A6                     | unknown           | 19.75  | 23.06  | TRUE  | FALSE | TRUE  |
| 1567 | Q8WU90 | Zinc finger CCH domain-containing   | unknown           | 4.00   | -17.71 | FALSE | TRUE  | TRUE  |
| 1568 | Q96B26 | Exosome complex component RRP4      | NUCLEUS           | -10.73 | -26.21 | FALSE | TRUE  | TRUE  |
| 1569 | Q9Y3Y2 | Chromatin target of PRMT1 protein   | NUCLEUS           | -0.53  | -41.82 | FALSE | TRUE  | TRUE  |
| 1570 | Q3MHD2 | Protein LSM12 homolog               | unknown           | 2.12   | -16.97 | FALSE | TRUE  | FALSE |
| 1571 | Q8NCA5 | Protein FAM98A                      | unknown           | 6.22   | -25.21 | FALSE | TRUE  | FALSE |
| 1572 | Q96N67 | Dedicator of cytokinesis protein 7  | unknown           | 2.23   | -11.31 | FALSE | TRUE  | TRUE  |
| 1573 | Q9BV20 | Methylthioribose-1-phosphate isom   | unknown           | 17.86  | 8.83   | FALSE | TRUE  | FALSE |
| 1574 | Q15631 | Translin                            | unknown           | 19.00  | 10.40  | FALSE | TRUE  | FALSE |
| 1575 | Q12874 | Splicing factor 3A subunit 3        | NUCLEUS           | 4.87   | -34.92 | FALSE | TRUE  | FALSE |
| 1576 | Q9BPX5 | Actin-related protein 2/3 complex s | unknown           | 1.31   | -14.28 | FALSE | TRUE  | FALSE |
| 1577 | O43837 | Isocitrate dehydrogenase [NAD] su   | MITOCHONDRIA      | 40.45  | -5.26  | FALSE | TRUE  | TRUE  |
| 1578 | Q6P996 | Pyridoxal-dependent decarboxylase   | unknown           | 20.06  | 15.81  | TRUE  | TRUE  | TRUE  |
| 1579 | Q9H3N1 | Thioredoxin-related transmembran    | ER                | 0.96   | 33.08  | TRUE  | TRUE  | TRUE  |
| 1580 | P82673 | 28S ribosomal protein S35, mitoch   | MITOCHONDRIA      | 43.11  | -6.96  | FALSE | TRUE  | TRUE  |
| 1581 | Q15005 | Signal peptidase complex subunit 2  | ER                | 4.31   | 33.16  | FALSE | TRUE  | FALSE |
| 1582 | O96005 | Cleft lip and palate transmembrane  | ER                | -6.02  | 32.43  | TRUE  | TRUE  | TRUE  |
| 1583 | P21283 | V-type proton ATPase subunit C 1    | unknown           | -12.78 | 3.51   | FALSE | TRUE  | TRUE  |
| 1584 | P56182 | Ribosomal RNA processing protein 1  | NUCLEUS           | -0.30  | -37.91 | FALSE | TRUE  | TRUE  |
| 1585 | Q9UPU5 | Ubiquitin carboxyl-terminal hydrola | unknown           | 5.31   | 3.32   | FALSE | TRUE  | TRUE  |
| 1586 | P14927 | Cytochrome b-c1 complex subunit 7   | MITOCHONDRIA      | 32.03  | -13.43 | FALSE | TRUE  | TRUE  |
| 1587 | Q9NRW7 | Vacuolar protein sorting-associated | unknown           | -35.01 | 15.20  | FALSE | TRUE  | TRUE  |
| 1588 | P07741 | Adenine phosphoribosyltransferase   | CYTOSOL           | 25.61  | 24.58  | FALSE | TRUE  | FALSE |
| 1589 | Q8TC07 | TBC1 domain family member 15        | unknown           | 12.95  | 8.80   | FALSE | TRUE  | TRUE  |
| 1590 | P21953 | 2-oxoisovalerate dehydrogenase su   | MITOCHONDRIA      | 36.71  | -8.81  | FALSE | TRUE  | FALSE |
| 1591 | Q9BXW7 | Haloacid dehalogenase-like hydrola  | MITOCHONDRIA      | 37.54  | -8.77  | FALSE | TRUE  | TRUE  |
| 1592 | P82933 | 28S ribosomal protein S9, mitochon  | MITOCHONDRIA      | 43.07  | -6.38  | FALSE | TRUE  | TRUE  |

|      |        |                                       |                   |        |        |       |      |       |
|------|--------|---------------------------------------|-------------------|--------|--------|-------|------|-------|
| 1593 | Q96GC5 | 39S ribosomal protein L48, mitocho    | unknown           | 42.11  | -3.13  | FALSE | TRUE | FALSE |
| 1594 | Q15836 | Vesicle-associated membrane prot      | unknown           | -31.89 | 0.15   | TRUE  | TRUE | TRUE  |
| 1595 | Q9UPP1 | Histone lysine demethylase PHF8       | NUCLEUS-CHROMATIN | -17.31 | -16.33 | FALSE | TRUE | TRUE  |
| 1596 | P82930 | 28S ribosomal protein S34, mitocho    | MITOCHONDRIA      | 39.74  | -7.73  | FALSE | TRUE | TRUE  |
| 1597 | P12270 | Nucleoprotein TPR                     | NUCLEUS           | -18.15 | -27.77 | TRUE  | TRUE | TRUE  |
| 1598 | Q9Y676 | 28S ribosomal protein S18b, mitocho   | unknown           | 37.61  | -9.67  | FALSE | TRUE | TRUE  |
| 1599 | Q9H7N4 | Splicing factor, arginine/serine-rich | NUCLEUS           | 1.95   | -33.21 | TRUE  | TRUE | TRUE  |
| 1600 | O75489 | NADH dehydrogenase [ubiquinone]       | MITOCHONDRIA      | 31.32  | -12.87 | FALSE | TRUE | FALSE |
| 1601 | Q9NQ88 | Fructose-2,6-bisphosphatase TIGAF     | unknown           | 20.64  | 21.68  | FALSE | TRUE | FALSE |
| 1602 | P52594 | Arf-GAP domain and FG repeat-con      | unknown           | -0.11  | -14.09 | TRUE  | TRUE | TRUE  |
| 1603 | Q9NQP4 | Prefoldin subunit 4                   | CYTOSOL           | 21.63  | 23.54  | FALSE | TRUE | TRUE  |
| 1604 | Q05655 | Protein kinase C delta type           | unknown           | -14.66 | 14.25  | FALSE | TRUE | TRUE  |
| 1605 | Q9NU22 | Midasin                               | NUCLEUS           | -4.33  | -31.43 | FALSE | TRUE | TRUE  |
| 1606 | Q9H089 | Large subunit GTPase 1 homolog        | ER                | -2.39  | 35.91  | FALSE | TRUE | FALSE |
| 1607 | Q9BRS2 | Serine/threonine-protein kinase RIC   | unknown           | 12.25  | -9.55  | FALSE | TRUE | TRUE  |
| 1608 | Q5GLZ8 | Probable E3 ubiquitin-protein ligase  | unknown           | 12.82  | 10.88  | FALSE | TRUE | FALSE |
| 1609 | Q9H9A6 | Leucine-rich repeat-containing prot   | unknown           | 8.43   | -0.41  | FALSE | TRUE | FALSE |
| 1610 | O75475 | PC4 and SFRS1-interacting protein     | NUCLEUS           | -25.98 | -23.59 | FALSE | TRUE | TRUE  |
| 1611 | P49916 | DNA ligase 3                          | unknown           | -23.42 | -22.45 | FALSE | TRUE | TRUE  |
| 1612 | Q15022 | Polycomb protein SUZ12                | unknown           | -22.32 | -18.39 | FALSE | TRUE | TRUE  |
| 1613 | Q01968 | Inositol polyphosphate 5-phosphat     | unknown           | -9.25  | 6.00   | FALSE | TRUE | TRUE  |
| 1614 | P36405 | ADP-ribosylation factor-like protein  | unknown           | 17.59  | 18.66  | FALSE | TRUE | FALSE |
| 1615 | Q13405 | 39S ribosomal protein L49, mitocho    | MITOCHONDRIA      | 40.71  | -11.80 | FALSE | TRUE | TRUE  |
| 1616 | Q9NPF4 | Probable tRNA N6-adenosine threo      | unknown           | 20.78  | 13.06  | FALSE | TRUE | TRUE  |
| 1617 | Q9UNZ5 | Leydig cell tumor 10 kDa protein ho   | NUCLEUS           | -3.18  | -22.47 | FALSE | TRUE | TRUE  |
| 1618 | P57772 | Selenocysteine-specific elongation    | unknown           | -0.55  | -13.58 | FALSE | TRUE | TRUE  |
| 1619 | Q9UJ83 | 2-hydroxyacyl-CoA lyase 1             | PEROXISOME        | 52.51  | -3.48  | FALSE | TRUE | TRUE  |
| 1620 | P33897 | ATP-binding cassette sub-family D i   | PEROXISOME        | 52.88  | -3.56  | FALSE | TRUE | TRUE  |
| 1621 | Q6ZNB6 | NF-X1-type zinc finger protein NFXL   | unknown           | 3.31   | 36.94  | FALSE | TRUE | TRUE  |
| 1622 | Q6FI81 | Anamorsin                             | CYTOSOL           | 22.16  | 23.37  | TRUE  | TRUE | TRUE  |
| 1623 | Q9HCD5 | Nuclear receptor coactivator 5        | NUCLEUS           | 1.60   | -35.27 | FALSE | TRUE | TRUE  |
| 1624 | Q9Y2Q9 | 28S ribosomal protein S28, mitocho    | MITOCHONDRIA      | 39.98  | -11.12 | TRUE  | TRUE | FALSE |
| 1625 | Q96P70 | Importin-9                            | unknown           | 19.02  | 15.10  | FALSE | TRUE | FALSE |
| 1626 | Q8IUF8 | Ribosomal oxygenase 2                 | unknown           | -15.81 | -17.42 | FALSE | TRUE | FALSE |
| 1627 | Q92747 | Actin-related protein 2/3 complex s   | unknown           | 2.08   | -14.07 | FALSE | TRUE | FALSE |
| 1628 | P19174 | 1-phosphatidylinositol 4,5-bisphosp   | unknown           | 12.27  | 5.24   | FALSE | TRUE | FALSE |
| 1629 | O43719 | HIV Tat-specific factor 1             | NUCLEUS           | 10.74  | -12.23 | TRUE  | TRUE | TRUE  |
| 1630 | O94992 | Protein HEXIM1                        | unknown           | 11.82  | -11.38 | FALSE | TRUE | FALSE |

|      |        |                                     |              |        |        |       |      |       |
|------|--------|-------------------------------------|--------------|--------|--------|-------|------|-------|
| 1631 | Q04323 | UBX domain-containing protein 1     | unknown      | 18.85  | 20.55  | FALSE | TRUE | TRUE  |
| 1632 | Q969X5 | Endoplasmic reticulum-Golgi interm  | unknown      | -6.71  | 32.56  | FALSE | TRUE | TRUE  |
| 1633 | Q96A33 | Coiled-coil domain-containing prote | ER           | 2.64   | 35.98  | TRUE  | TRUE | TRUE  |
| 1634 | Q8WVY7 | Ubiquitin-like domain-containing CT | unknown      | 17.37  | 6.35   | FALSE | TRUE | FALSE |
| 1635 | Q9Y446 | Plakophilin-3                       | unknown      | -33.39 | -1.63  | TRUE  | TRUE | TRUE  |
| 1636 | Q69YN2 | CWF19-like protein 1                | NUCLEUS      | -4.06  | -16.52 | FALSE | TRUE | TRUE  |
| 1637 | P08651 | Nuclear factor 1 C-type             | NUCLEUS      | -22.76 | -23.57 | FALSE | TRUE | TRUE  |
| 1638 | P51452 | Dual specificity protein phosphatas | CYTOSOL      | 20.95  | 20.90  | FALSE | TRUE | FALSE |
| 1639 | Q96CW5 | Gamma-tubulin complex componer      | unknown      | 6.34   | -24.83 | FALSE | TRUE | TRUE  |
| 1640 | P40937 | Replication factor C subunit 5      | unknown      | -15.57 | -16.70 | FALSE | TRUE | FALSE |
| 1641 | O95394 | Phosphoacetylglucosamine mutase     | CYTOSOL      | 21.78  | 21.88  | FALSE | TRUE | TRUE  |
| 1642 | O60341 | Lysine-specific histone demethylase | NUCLEUS      | -23.93 | -24.99 | FALSE | TRUE | TRUE  |
| 1643 | Q6NZI2 | Caveolae-associated protein 1       | unknown      | -0.84  | 1.48   | FALSE | TRUE | TRUE  |
| 1644 | Q14126 | Desmoglein-2                        | PM           | -29.26 | 2.40   | TRUE  | TRUE | TRUE  |
| 1645 | Q9H2J4 | Phosducin-like protein 3            | CYTOSOL      | 11.42  | 18.73  | TRUE  | TRUE | TRUE  |
| 1646 | Q92614 | Unconventional myosin-XVIIIa        | unknown      | -1.44  | 3.95   | TRUE  | TRUE | TRUE  |
| 1647 | Q9UHG3 | Prenylcysteine oxidase 1            | ER           | -5.93  | 31.39  | FALSE | TRUE | TRUE  |
| 1648 | Q96T76 | MMS19 nucleotide excision repair p  | unknown      | 10.23  | 3.73   | FALSE | TRUE | FALSE |
| 1649 | Q9Y6E2 | Basic leucine zipper and W2 domain  | NUCLEUS      | -2.88  | -14.04 | FALSE | TRUE | TRUE  |
| 1650 | O14672 | Disintegrin and metalloproteinase c | unknown      | -19.86 | 19.15  | FALSE | TRUE | FALSE |
| 1651 | Q9Y697 | Cysteine desulfurase, mitochondria  | MITOCHONDRIA | 36.38  | -5.99  | FALSE | TRUE | TRUE  |
| 1652 | P14384 | Carboxypeptidase M                  | PM           | -25.95 | 15.36  | FALSE | TRUE | TRUE  |
| 1653 | Q9Y2K7 | Lysine-specific demethylase 2A      | NUCLEUS      | -18.86 | -26.26 | TRUE  | TRUE | FALSE |
| 1654 | P37198 | Nuclear pore glycoprotein p62       | unknown      | -6.79  | -23.07 | FALSE | TRUE | TRUE  |
| 1655 | P07108 | Acyl-CoA-binding protein            | unknown      | 25.42  | 22.60  | FALSE | TRUE | FALSE |
| 1656 | Q8WWM7 | Ataxin-2-like protein               | unknown      | 6.52   | -20.52 | TRUE  | TRUE | TRUE  |
| 1657 | Q9NQG5 | Regulation of nuclear pre-mRNA do   | NUCLEUS      | -14.83 | -29.56 | FALSE | TRUE | FALSE |
| 1658 | Q5K651 | Sterile alpha motif domain-containi | unknown      | -5.02  | -10.03 | FALSE | TRUE | TRUE  |
| 1659 | Q96GM5 | SWI/SNF-related matrix-associated   | unknown      | -24.46 | -22.19 | FALSE | TRUE | TRUE  |
| 1660 | O75955 | Flotillin-1                         | unknown      | -32.41 | 4.70   | TRUE  | TRUE | TRUE  |
| 1661 | Q92878 | DNA repair protein RAD50            | unknown      | -16.56 | -17.01 | FALSE | TRUE | TRUE  |
| 1662 | Q9H074 | Polyadenylate-binding protein-inter | unknown      | 19.72  | 11.48  | FALSE | TRUE | TRUE  |
| 1663 | P28331 | NADH-ubiquinone oxidoreductase 7    | MITOCHONDRIA | 31.09  | -14.57 | FALSE | TRUE | TRUE  |
| 1664 | Q9BVJ6 | U3 small nucleolar RNA-associated   | NUCLEUS      | -0.71  | -41.11 | TRUE  | TRUE | TRUE  |
| 1665 | O95299 | NADH dehydrogenase [ubiquinone]     | MITOCHONDRIA | 30.95  | -13.51 | FALSE | TRUE | TRUE  |
| 1666 | P60510 | Serine/threonine-protein phosphat   | unknown      | 24.91  | 18.82  | FALSE | TRUE | FALSE |
| 1667 | Q6P2E9 | Enhancer of mRNA-decapping prote    | unknown      | 2.74   | -24.22 | TRUE  | TRUE | TRUE  |
| 1668 | Q9BV38 | WD repeat-containing protein 18     | NUCLEUS      | 0.67   | -34.53 | FALSE | TRUE | TRUE  |

|      |        |                                       |                   |        |        |       |      |       |
|------|--------|---------------------------------------|-------------------|--------|--------|-------|------|-------|
| 1669 | Q96BP3 | Peptidylprolyl isomerase domain ar    | NUCLEUS           | -1.22  | -26.83 | FALSE | TRUE | FALSE |
| 1670 | Q9BQ69 | O-acetyl-ADP-ribose deacetylase M     | MITOCHONDRIA      | 31.23  | -11.19 | FALSE | TRUE | FALSE |
| 1671 | Q9NY33 | Dipeptidyl peptidase 3                | CYTOSOL           | 21.48  | 23.12  | TRUE  | TRUE | TRUE  |
| 1672 | Q13895 | Bystin                                | NUCLEUS           | -2.69  | -38.72 | FALSE | TRUE | TRUE  |
| 1673 | Q9BTC0 | Death-inducer obliterator 1           | NUCLEUS           | -13.85 | -22.64 | TRUE  | TRUE | TRUE  |
| 1674 | Q92890 | Ubiquitin recognition factor in ER-as | NUCLEUS           | -0.97  | -5.38  | FALSE | TRUE | FALSE |
| 1675 | Q8N122 | Regulatory-associated protein of m    | unknown           | -15.21 | 4.51   | FALSE | TRUE | TRUE  |
| 1676 | Q12765 | Secernin-1                            | CYTOSOL           | 22.18  | 21.21  | FALSE | TRUE | TRUE  |
| 1677 | P18887 | DNA repair protein XRCC1              | NUCLEUS           | -22.45 | -21.55 | FALSE | TRUE | TRUE  |
| 1678 | P42695 | Condensin-2 complex subunit D3        | NUCLEUS-CHROMATIN | -9.53  | -21.36 | FALSE | TRUE | FALSE |
| 1679 | P04179 | Superoxide dismutase [Mn], mitoch     | MITOCHONDRIA      | 38.13  | -11.34 | FALSE | TRUE | TRUE  |
| 1680 | Q6P1L8 | 39S ribosomal protein L14, mitoch     | MITOCHONDRIA      | 40.39  | -0.75  | FALSE | TRUE | FALSE |
| 1681 | O43681 | ATPase ASNA1                          | unknown           | 13.99  | 10.14  | FALSE | TRUE | TRUE  |
| 1682 | Q9BU61 | NADH dehydrogenase [ubiquinone]       | MITOCHONDRIA      | 36.21  | -8.84  | FALSE | TRUE | TRUE  |
| 1683 | O00469 | Procollagen-lysine,2-oxoglutarate 5   | unknown           | -0.69  | 39.20  | FALSE | TRUE | TRUE  |
| 1684 | Q13112 | Chromatin assembly factor 1 subun     | NUCLEUS           | -21.77 | -25.06 | FALSE | TRUE | TRUE  |
| 1685 | O43148 | mRNA cap guanine-N7 methyltrans       | unknown           | 23.88  | 12.86  | FALSE | TRUE | TRUE  |
| 1686 | Q86XI2 | Condensin-2 complex subunit G2        | unknown           | -5.05  | -13.33 | FALSE | TRUE | TRUE  |
| 1687 | Q14807 | Kinesin-like protein KIF22            | NUCLEUS-CHROMATIN | -19.66 | -14.66 | FALSE | TRUE | TRUE  |
| 1688 | Q9ULF5 | Zinc transporter ZIP10                | PM                | -27.35 | 11.58  | TRUE  | TRUE | TRUE  |
| 1689 | Q9H0C8 | Integrin-linked kinase-associated s   | NUCLEUS           | 0.77   | -24.77 | TRUE  | TRUE | FALSE |
| 1690 | Q6NUK1 | Calcium-binding mitochondrial carri   | MITOCHONDRIA      | 43.81  | -10.15 | FALSE | TRUE | TRUE  |
| 1691 | O43237 | Cytoplasmic dynein 1 light intermec   | unknown           | -11.22 | -7.33  | TRUE  | TRUE | TRUE  |
| 1692 | Q16706 | Alpha-mannosidase 2                   | GOLGI             | -18.97 | 32.52  | FALSE | TRUE | TRUE  |
| 1693 | Q9Y4E8 | Ubiquitin carboxyl-terminal hydrola   | unknown           | 17.66  | 14.40  | FALSE | TRUE | TRUE  |
| 1694 | Q8NOX7 | Spartin                               | unknown           | -3.35  | -2.15  | TRUE  | TRUE | TRUE  |
| 1695 | P55196 | Afadin                                | unknown           | -28.14 | -0.23  | TRUE  | TRUE | TRUE  |
| 1696 | Q01970 | 1-phosphatidylinositol 4,5-bisphosp   | unknown           | -11.53 | 12.68  | TRUE  | TRUE | TRUE  |
| 1697 | A6NHR9 | Structural maintenance of chromos     | NUCLEUS-CHROMATIN | -21.01 | -12.23 | FALSE | TRUE | TRUE  |
| 1698 | Q8IZ83 | Aldehyde dehydrogenase family 16      | unknown           | 13.79  | -11.02 | FALSE | TRUE | TRUE  |
| 1699 | Q9H3K2 | Growth hormone-inducible transme      | MITOCHONDRIA      | 31.55  | -15.16 | FALSE | TRUE | TRUE  |
| 1700 | Q8N1G4 | Leucine-rich repeat-containing prot   | unknown           | 13.60  | -10.51 | FALSE | TRUE | TRUE  |
| 1701 | Q2M389 | WASH complex subunit 4                | unknown           | -14.48 | 9.02   | FALSE | TRUE | TRUE  |
| 1702 | Q8IXI1 | Mitochondrial Rho GTPase 2            | unknown           | 31.66  | -3.37  | FALSE | TRUE | FALSE |
| 1703 | Q9ULK4 | Mediator of RNA polymerase II tran    | NUCLEUS           | -1.48  | -30.45 | FALSE | TRUE | FALSE |
| 1704 | O14578 | Citron Rho-interacting kinase         | unknown           | 2.30   | -11.35 | FALSE | TRUE | TRUE  |
| 1705 | Q9Y263 | Phospholipase A-2-activating prote    | unknown           | 18.85  | 15.46  | TRUE  | TRUE | TRUE  |
| 1706 | P29218 | Inositol monophosphatase 1            | CYTOSOL           | 17.82  | 9.06   | FALSE | TRUE | TRUE  |

|      |        |                                      |                   |        |        |       |       |       |
|------|--------|--------------------------------------|-------------------|--------|--------|-------|-------|-------|
| 1707 | O15294 | UDP-N-acetylglucosamine--peptide     | NUCLEUS           | -12.72 | -28.41 | FALSE | TRUE  | TRUE  |
| 1708 | O94925 | Glutaminase kidney isoform, mitoch   | MITOCHONDRIA      | 34.88  | -6.86  | FALSE | TRUE  | TRUE  |
| 1709 | Q16204 | Coiled-coil domain-containing prote  | unknown           | 13.62  | -1.98  | FALSE | TRUE  | TRUE  |
| 1710 | Q9H444 | Charged multivesicular body protein  | unknown           | -17.46 | 3.85   | TRUE  | TRUE  | TRUE  |
| 1711 | Q99961 | Endophilin-A2                        | unknown           | 15.26  | 11.02  | TRUE  | TRUE  | TRUE  |
| 1712 | P40938 | Replication factor C subunit 3       | unknown           | -15.58 | -16.94 | FALSE | TRUE  | TRUE  |
| 1713 | Q5QJE6 | Deoxynucleotidyltransferase termin   | NUCLEUS           | -6.14  | -39.13 | TRUE  | TRUE  | TRUE  |
| 1714 | Q9NXF1 | Testis-expressed protein 10          | NUCLEUS           | 1.12   | -34.78 | FALSE | TRUE  | FALSE |
| 1715 | P49711 | Transcriptional repressor CTCF       | NUCLEUS           | -25.63 | -24.34 | TRUE  | TRUE  | TRUE  |
| 1716 | Q8ND56 | Protein LSM14 homolog A              | NUCLEUS           | -2.06  | -14.76 | FALSE | TRUE  | TRUE  |
| 1717 | Q7L8L6 | FAST kinase domain-containing pro    | MITOCHONDRIA      | 38.46  | -9.64  | FALSE | TRUE  | TRUE  |
| 1718 | Q9GZS3 | WD repeat-containing protein 61      | unknown           | 4.99   | -18.79 | FALSE | TRUE  | TRUE  |
| 1719 | Q9NQT5 | Exosome complex component RRP4       | NUCLEUS           | -10.88 | -25.96 | FALSE | TRUE  | FALSE |
| 1720 | Q9H5Q4 | Dimethyladenosine transferase 2, r   | MITOCHONDRIA      | 34.89  | -12.06 | FALSE | TRUE  | FALSE |
| 1721 | O60832 | H/ACA ribonucleoprotein complex s    | NUCLEUS           | -4.14  | -39.00 | TRUE  | TRUE  | TRUE  |
| 1722 | Q9NTI5 | Sister chromatid cohesion protein P  | NUCLEUS-CHROMATIN | -18.27 | -16.06 | FALSE | TRUE  | TRUE  |
| 1723 | Q9UNS2 | COP9 signalosome complex subunit     | unknown           | 11.06  | 19.65  | FALSE | TRUE  | TRUE  |
| 1724 | Q9BZK7 | F-box-like/WD repeat-containing pr   | NUCLEUS           | -13.71 | -29.75 | FALSE | TRUE  | TRUE  |
| 1725 | Q9UIA9 | Exportin-7                           | CYTOSOL           | 20.20  | 16.95  | FALSE | TRUE  | TRUE  |
| 1726 | Q9NYL9 | Tropomodulin-3                       | unknown           | 5.37   | 7.66   | TRUE  | TRUE  | FALSE |
| 1727 | Q8IZH2 | 5'-3' exoribonuclease 1              | unknown           | 1.33   | -14.36 | TRUE  | TRUE  | TRUE  |
| 1728 | P61956 | Small ubiquitin-related modifier 2   | unknown           | -17.49 | -31.36 | TRUE  | FALSE | TRUE  |
| 1729 | Q9Y3E0 | Vesicle transport protein GOT1B      | unknown           | -8.53  | 32.78  | FALSE | TRUE  | FALSE |
| 1730 | P36915 | Guanine nucleotide-binding protein   | unknown           | 18.89  | 10.56  | FALSE | TRUE  | TRUE  |
| 1731 | Q92692 | Nectin-2                             | PM                | -26.30 | 14.27  | TRUE  | FALSE | TRUE  |
| 1732 | Q92692 | Nectin-2                             | PM                | -24.71 | 4.58   | TRUE  | FALSE | TRUE  |
| 1733 | Q8WUA4 | General transcription factor 3C poly | NUCLEUS           | -23.60 | -23.11 | FALSE | TRUE  | FALSE |
| 1734 | Q86UK7 | E3 ubiquitin-protein ligase ZNF598   | unknown           | 7.52   | -20.58 | TRUE  | TRUE  | TRUE  |
| 1735 | Q9Y232 | Chromodomain Y-like protein          | NUCLEUS-CHROMATIN | -20.25 | -14.65 | TRUE  | TRUE  | TRUE  |
| 1736 | P33527 | Multidrug resistance-associated pro  | PM                | -21.63 | 11.46  | TRUE  | TRUE  | TRUE  |
| 1737 | Q9H9Y2 | Ribosome production factor 1         | NUCLEUS           | -1.02  | -37.66 | FALSE | TRUE  | FALSE |
| 1738 | Q12849 | G-rich sequence factor 1             | MITOCHONDRIA      | 38.00  | -8.34  | FALSE | TRUE  | TRUE  |
| 1739 | Q92665 | 28S ribosomal protein S31, mitoch    | MITOCHONDRIA      | 40.33  | -6.81  | FALSE | TRUE  | TRUE  |
| 1740 | O00193 | Small acidic protein                 | unknown           | 27.37  | 23.29  | TRUE  | TRUE  | TRUE  |
| 1741 | Q15654 | Thyroid receptor-interacting proteir | unknown           | -4.74  | -7.09  | FALSE | TRUE  | TRUE  |
| 1742 | Q9C0J8 | pre-mRNA 3' end processing proteir   | NUCLEUS           | -9.81  | -36.08 | TRUE  | TRUE  | TRUE  |
| 1743 | P35249 | Replication factor C subunit 4       | unknown           | -15.80 | -17.05 | TRUE  | TRUE  | FALSE |
| 1744 | O00233 | 26S proteasome non-ATPase regul      | unknown           | 14.30  | 15.42  | FALSE | TRUE  | TRUE  |

|      |        |                                       |                   |        |        |       |       |       |
|------|--------|---------------------------------------|-------------------|--------|--------|-------|-------|-------|
| 1745 | Q9NNW5 | WD repeat-containing protein 6        | NUCLEUS           | 9.37   | -4.17  | FALSE | TRUE  | FALSE |
| 1746 | P36897 | TGF-beta receptor type-1              | unknown           | -15.65 | 15.90  | FALSE | TRUE  | FALSE |
| 1747 | Q8N0U8 | Vitamin K epoxide reductase compl     | unknown           | -0.32  | 32.22  | FALSE | TRUE  | FALSE |
| 1748 | Q96GG9 | DCN1-like protein 1                   | unknown           | 9.95   | 0.08   | FALSE | TRUE  | TRUE  |
| 1749 | Q6ZRV2 | Protein FAM83H                        | unknown           | -4.25  | 14.36  | FALSE | TRUE  | TRUE  |
| 1750 | Q14008 | Cytoskeleton-associated protein 5     | unknown           | -12.74 | -8.35  | FALSE | TRUE  | TRUE  |
| 1751 | Q15058 | Kinesin-like protein KIF14            | unknown           | -7.16  | 0.11   | FALSE | TRUE  | TRUE  |
| 1752 | O95251 | Histone acetyltransferase KAT7        | unknown           | -17.30 | -17.88 | FALSE | TRUE  | TRUE  |
| 1753 | Q8N6R0 | Methyltransferase-like protein 13     | unknown           | -4.27  | -10.03 | FALSE | TRUE  | TRUE  |
| 1754 | O15212 | Prefoldin subunit 6                   | unknown           | 19.94  | 9.27   | FALSE | TRUE  | TRUE  |
| 1755 | P54920 | Alpha-soluble NSF attachment prot     | unknown           | -35.37 | 17.02  | FALSE | TRUE  | FALSE |
| 1756 | P32004 | Neural cell adhesion molecule L1      | PM                | -26.67 | 12.45  | FALSE | TRUE  | TRUE  |
| 1757 | P21399 | Cytoplasmic aconitate hydratase       | CYTOSOL           | 20.49  | 22.45  | FALSE | TRUE  | FALSE |
| 1758 | Q9BZH6 | WD repeat-containing protein 11       | unknown           | -14.32 | 8.02   | FALSE | TRUE  | FALSE |
| 1759 | P10301 | Ras-related protein R-Ras             | PM                | -26.00 | 2.56   | FALSE | TRUE  | TRUE  |
| 1760 | Q6PKG0 | La-related protein 1                  | unknown           | 7.08   | -24.70 | TRUE  | TRUE  | TRUE  |
| 1761 | Q8TBX8 | Phosphatidylinositol 5-phosphate 4    | unknown           | -2.04  | 6.91   | FALSE | TRUE  | TRUE  |
| 1762 | Q8NFH3 | Nucleoporin Nup43                     | NUCLEUS           | -19.03 | -29.81 | FALSE | TRUE  | FALSE |
| 1763 | O76071 | Probable cytosolic iron-sulfur protei | unknown           | 16.24  | 12.73  | FALSE | TRUE  | TRUE  |
| 1764 | Q8WVC6 | Dephospho-CoA kinase domain-cor       | ER                | 2.01   | 33.58  | FALSE | TRUE  | FALSE |
| 1765 | Q9ULW0 | Targeting protein for Xklp2           | NUCLEUS-CHROMATIN | -21.54 | -12.98 | TRUE  | TRUE  | TRUE  |
| 1766 | Q6PL18 | ATPase family AAA domain-contain      | unknown           | -21.01 | -12.19 | FALSE | TRUE  | TRUE  |
| 1767 | Q9BYT8 | Neurolysin, mitochondrial             | unknown           | 21.95  | -3.81  | FALSE | TRUE  | FALSE |
| 1768 | Q6PI48 | Aspartate--tRNA ligase, mitochondr    | MITOCHONDRIA      | 35.61  | -14.36 | FALSE | TRUE  | FALSE |
| 1769 | P08648 | Integrin alpha-5                      | PM                | -30.87 | 13.33  | FALSE | TRUE  | TRUE  |
| 1770 | Q96HE7 | ERO1-like protein alpha               | unknown           | -0.74  | 40.04  | FALSE | TRUE  | TRUE  |
| 1771 | Q9P2I0 | Cleavage and polyadenylation spec     | NUCLEUS           | -10.06 | -36.06 | FALSE | TRUE  | FALSE |
| 1772 | Q99959 | Plakophilin-2                         | unknown           | -23.11 | 3.95   | TRUE  | TRUE  | TRUE  |
| 1773 | Q2NKX8 | DNA excision repair protein ERCC-6-   | NUCLEUS           | 2.15   | -3.06  | TRUE  | TRUE  | TRUE  |
| 1774 | Q96RL7 | Vacuolar protein sorting-associated   | unknown           | -3.68  | 1.65   | FALSE | TRUE  | FALSE |
| 1775 | Q96TA2 | ATP-dependent zinc metalloprotea      | MITOCHONDRIA      | 34.38  | -12.14 | FALSE | TRUE  | FALSE |
| 1776 | P60983 | Glia maturation factor beta           | unknown           | 10.13  | 21.50  | FALSE | TRUE  | FALSE |
| 1777 | Q13526 | Peptidyl-prolyl cis-trans isomerase I | unknown           | 10.30  | -0.96  | FALSE | TRUE  | TRUE  |
| 1778 | Q9Y6Y8 | SEC23-interacting protein             | unknown           | 3.46   | 11.38  | FALSE | TRUE  | TRUE  |
| 1779 | Q8WWY3 | U4/U6 small nuclear ribonucleoprot    | NUCLEUS           | 3.70   | -35.58 | FALSE | TRUE  | TRUE  |
| 1780 | Q9Y3B2 | Exosome complex component CSL4        | NUCLEUS           | -10.70 | -26.18 | FALSE | TRUE  | TRUE  |
| 1781 | P14174 | Macrophage migration inhibitory fa    | unknown           | 14.33  | 23.29  | FALSE | FALSE | TRUE  |
| 1782 | Q8NEZ5 | F-box only protein 22                 | unknown           | 25.19  | 21.10  | FALSE | TRUE  | TRUE  |

|      |        |                                        |              |        |        |       |       |       |
|------|--------|----------------------------------------|--------------|--------|--------|-------|-------|-------|
| 1783 | P23458 | Tyrosine-protein kinase JAK1           | PM           | -24.56 | 13.37  | FALSE | TRUE  | FALSE |
| 1784 | P35250 | Replication factor C subunit 2         | unknown      | -15.74 | -17.23 | FALSE | TRUE  | TRUE  |
| 1785 | Q9BQ70 | Transcription factor 25                | unknown      | -7.58  | -0.52  | FALSE | TRUE  | TRUE  |
| 1786 | Q9UBC2 | Epidermal growth factor receptor su    | unknown      | 2.37   | -10.37 | TRUE  | TRUE  | TRUE  |
| 1787 | Q8N6T3 | ADP-ribosylation factor GTPase-act     | unknown      | -3.16  | 6.34   | TRUE  | TRUE  | TRUE  |
| 1788 | Q92997 | Segment polarity protein dishevelle    | unknown      | 2.52   | 1.70   | TRUE  | TRUE  | TRUE  |
| 1789 | P28838 | Cytosol aminopeptidase                 | unknown      | 20.21  | -3.21  | FALSE | TRUE  | TRUE  |
| 1790 | Q9NRN7 | L-aminoadipate-semialdehyde deh        | unknown      | 22.55  | 11.82  | FALSE | TRUE  | FALSE |
| 1791 | O43818 | U3 small nucleolar RNA-interacting     | NUCLEUS      | -3.44  | -40.78 | FALSE | TRUE  | TRUE  |
| 1792 | P09417 | Dihydropteridine reductase             | unknown      | 9.05   | 7.48   | FALSE | TRUE  | FALSE |
| 1793 | Q03001 | Dystonin                               | unknown      | -22.92 | 8.22   | TRUE  | FALSE | TRUE  |
| 1794 | Q03001 | Dystonin                               | unknown      | -1.70  | 1.86   | TRUE  | FALSE | TRUE  |
| 1795 | Q63HN8 | E3 ubiquitin-protein ligase RNF213     | unknown      | 6.29   | -24.74 | FALSE | TRUE  | TRUE  |
| 1796 | Q6P1N9 | Putative deoxyribonuclease TATDN       | unknown      | 9.75   | 8.91   | FALSE | TRUE  | FALSE |
| 1797 | P19404 | NADH dehydrogenase [ubiquinone]        | MITOCHONDRIA | 31.02  | -14.95 | FALSE | TRUE  | FALSE |
| 1798 | Q03468 | DNA excision repair protein ERCC-6     | NUCLEUS      | -12.25 | -18.53 | FALSE | TRUE  | TRUE  |
| 1799 | P50897 | Palmitoyl-protein thioesterase 1       | unknown      | -40.92 | 9.33   | FALSE | TRUE  | TRUE  |
| 1800 | Q9H0U6 | 39S ribosomal protein L18, mitoch      | MITOCHONDRIA | 36.47  | -4.67  | FALSE | TRUE  | FALSE |
| 1801 | Q9H4A6 | Golgi phosphoprotein 3                 | unknown      | -22.09 | 29.43  | FALSE | TRUE  | FALSE |
| 1802 | Q9BYD3 | 39S ribosomal protein L4, mitoch       | MITOCHONDRIA | 36.86  | -6.20  | FALSE | TRUE  | TRUE  |
| 1803 | Q96LD4 | E3 ubiquitin-protein ligase TRIM47     | unknown      | 2.21   | -1.99  | FALSE | TRUE  | TRUE  |
| 1804 | Q96FZ2 | Embryonic stem cell-specific 5-hydr    | unknown      | -2.34  | -1.97  | FALSE | TRUE  | TRUE  |
| 1805 | P52948 | Nuclear pore complex protein Nup9      | NUCLEUS      | -20.70 | -29.05 | TRUE  | TRUE  | TRUE  |
| 1806 | Q9UKF6 | Cleavage and polyadenylation spec      | NUCLEUS      | -10.58 | -35.85 | FALSE | TRUE  | TRUE  |
| 1807 | Q8TBC4 | NEDD8-activating enzyme E1 catal       | unknown      | 26.14  | 23.17  | FALSE | TRUE  | FALSE |
| 1808 | P00533 | Epidermal growth factor receptor       | PM           | -27.77 | 7.51   | TRUE  | TRUE  | TRUE  |
| 1809 | O75380 | NADH dehydrogenase [ubiquinone]        | MITOCHONDRIA | 29.10  | -7.88  | FALSE | TRUE  | FALSE |
| 1810 | Q96H79 | Zinc finger CCCH-type antiviral prot   | unknown      | -2.25  | -10.02 | FALSE | TRUE  | TRUE  |
| 1811 | Q14232 | Translation initiation factor eIF-2B s | unknown      | 21.64  | 12.32  | FALSE | TRUE  | TRUE  |
| 1812 | P61225 | Ras-related protein Rap-2b             | unknown      | -28.32 | 10.79  | FALSE | TRUE  | FALSE |
| 1813 | O75027 | ATP-binding cassette sub-family B r    | MITOCHONDRIA | 35.50  | -3.30  | FALSE | TRUE  | FALSE |
| 1814 | O95140 | Mitofusin-2                            | MITOCHONDRIA | 34.43  | -4.07  | FALSE | TRUE  | TRUE  |
| 1815 | P49757 | Protein numb homolog                   | unknown      | -9.11  | 8.70   | TRUE  | FALSE | FALSE |
| 1816 | O95302 | Peptidyl-prolyl cis-trans isomerase I  | ER           | 2.69   | 39.60  | FALSE | TRUE  | FALSE |
| 1817 | Q96P11 | Probable 28S rRNA (cytosine-C(5))-r    | NUCLEUS      | 2.58   | -27.38 | FALSE | TRUE  | FALSE |
| 1818 | Q96GM8 | Target of EGR1 protein 1               | NUCLEUS      | 2.08   | -27.94 | FALSE | TRUE  | TRUE  |
| 1819 | Q9H7Z7 | Prostaglandin E synthase 2             | MITOCHONDRIA | 38.93  | -12.09 | FALSE | TRUE  | FALSE |
| 1820 | O00534 | von Willebrand factor A domain-co      | unknown      | 4.08   | 1.39   | FALSE | TRUE  | TRUE  |



|      |        |                                      |              |        |        |       |       |       |
|------|--------|--------------------------------------|--------------|--------|--------|-------|-------|-------|
| 1821 | Q6P1M0 | Long-chain fatty acid transport prot | ER           | -5.97  | 32.55  | FALSE | TRUE  | FALSE |
| 1822 | Q13356 | RING-type E3 ubiquitin-protein ligas | NUCLEUS      | -1.63  | -26.90 | FALSE | TRUE  | TRUE  |
| 1823 | Q04726 | Transducin-like enhancer protein 3   | unknown      | 8.45   | -13.86 | FALSE | TRUE  | TRUE  |
| 1824 | Q07864 | DNA polymerase epsilon catalytic s   | NUCLEUS      | -9.92  | -15.86 | FALSE | TRUE  | TRUE  |
| 1825 | Q32P41 | tRNA (guanine(37)-N1)-methyltrans    | unknown      | 20.00  | -2.84  | FALSE | TRUE  | FALSE |
| 1826 | Q9H6Z4 | Ran-binding protein 3                | unknown      | 20.64  | 15.16  | FALSE | TRUE  | TRUE  |
| 1827 | Q9BU23 | Lipase maturation factor 2           | ER           | 4.26   | 35.78  | FALSE | TRUE  | TRUE  |
| 1828 | Q96EY7 | Pentatricopeptide repeat domain-co   | MITOCHONDRIA | 43.42  | -11.72 | FALSE | TRUE  | TRUE  |
| 1829 | Q96GD4 | Aurora kinase B                      | unknown      | -17.08 | -13.65 | FALSE | TRUE  | FALSE |
| 1830 | Q99442 | Translocation protein SEC62          | ER           | 2.35   | 35.34  | FALSE | TRUE  | TRUE  |
| 1831 | Q9Y2X0 | Mediator of RNA polymerase II tran   | NUCLEUS      | -8.32  | -21.34 | FALSE | TRUE  | FALSE |
| 1832 | P49821 | NADH dehydrogenase [ubiquinone]      | MITOCHONDRIA | 30.84  | -14.16 | FALSE | TRUE  | FALSE |
| 1833 | Q8NFF5 | FAD synthase                         | unknown      | 21.62  | -3.75  | FALSE | TRUE  | FALSE |
| 1834 | Q05397 | Focal adhesion kinase 1              | unknown      | 9.28   | -3.15  | FALSE | TRUE  | TRUE  |
| 1835 | P28482 | Mitogen-activated protein kinase 1   | unknown      | 7.54   | -5.44  | FALSE | TRUE  | TRUE  |
| 1836 | Q96Q11 | CCA tRNA nucleotidyltransferase 1,   | unknown      | 21.34  | -3.67  | FALSE | TRUE  | FALSE |
| 1837 | Q9BZJ0 | Crooked neck-like protein 1          | NUCLEUS      | -4.13  | -38.19 | FALSE | TRUE  | TRUE  |
| 1838 | Q05048 | Cleavage stimulation factor subunit  | NUCLEUS      | -10.42 | -35.03 | FALSE | TRUE  | FALSE |
| 1839 | Q9NV31 | U3 small nucleolar ribonucleoprotei  | NUCLEUS      | -2.16  | -38.61 | FALSE | TRUE  | FALSE |
| 1840 | Q8N8A6 | ATP-dependent RNA helicase DDX5      | NUCLEUS      | -1.73  | -34.54 | FALSE | TRUE  | TRUE  |
| 1841 | Q14738 | Serine/threonine-protein phosphat    | unknown      | 15.87  | 9.55   | TRUE  | TRUE  | TRUE  |
| 1842 | P52732 | Kinesin-like protein KIF11           | unknown      | -10.75 | -7.02  | FALSE | TRUE  | TRUE  |
| 1843 | P40189 | Interleukin-6 receptor subunit beta  | unknown      | -33.02 | 12.67  | TRUE  | FALSE | FALSE |
| 1844 | Q9H3U1 | Protein unc-45 homolog A             | unknown      | 6.41   | 4.50   | FALSE | TRUE  | FALSE |
| 1845 | Q8IY17 | Neuropathy target esterase           | unknown      | -7.41  | 37.35  | FALSE | TRUE  | TRUE  |
| 1846 | Q96RE7 | Nucleus accumbens-associated pro     | NUCLEUS      | -9.37  | -16.24 | FALSE | TRUE  | TRUE  |
| 1847 | Q9BT78 | COP9 signalosome complex subunit     | unknown      | 17.30  | 12.98  | FALSE | TRUE  | FALSE |
| 1848 | Q5T9L3 | Protein wntless homolog              | unknown      | -9.80  | 33.52  | FALSE | TRUE  | FALSE |
| 1849 | Q9Y2W2 | WW domain-binding protein 11         | NUCLEUS      | 3.58   | -34.52 | TRUE  | TRUE  | TRUE  |
| 1850 | A4D1E9 | GTP-binding protein 10               | MITOCHONDRIA | 42.93  | -12.31 | FALSE | TRUE  | TRUE  |
| 1851 | O75695 | Protein XRP2                         | PM           | -21.91 | 9.76   | FALSE | TRUE  | FALSE |
| 1852 | Q53EP0 | Fibronectin type III domain-contain  | unknown      | 5.02   | 37.83  | FALSE | TRUE  | TRUE  |
| 1853 | Q13617 | Cullin-2                             | unknown      | 15.72  | 7.35   | FALSE | TRUE  | TRUE  |
| 1854 | P20645 | Cation-dependent mannose-6-phos      | unknown      | -34.51 | 19.06  | FALSE | TRUE  | TRUE  |
| 1855 | Q9NVD7 | Alpha-parvin                         | unknown      | -11.52 | 12.99  | TRUE  | TRUE  | TRUE  |
| 1856 | P82663 | 28S ribosomal protein S25, mitoch    | unknown      | 44.06  | -6.23  | FALSE | TRUE  | FALSE |
| 1857 | Q5H9R7 | Serine/threonine-protein phosphat    | unknown      | 20.15  | 14.70  | TRUE  | TRUE  | TRUE  |
| 1858 | P04040 | Catalase                             | PEROXISOME   | 52.86  | -3.53  | FALSE | TRUE  | TRUE  |

|      |        |                                      |                   |        |        |       |       |       |
|------|--------|--------------------------------------|-------------------|--------|--------|-------|-------|-------|
| 1859 | Q9NYH9 | U3 small nucleolar RNA-associated    | NUCLEUS           | -2.57  | -40.99 | FALSE | TRUE  | TRUE  |
| 1860 | Q96K37 | Solute carrier family 35 member E1   | unknown           | -16.62 | 31.62  | FALSE | TRUE  | FALSE |
| 1861 | P41223 | Protein BUD31 homolog                | NUCLEUS           | -2.09  | -26.81 | FALSE | TRUE  | FALSE |
| 1862 | Q9NX47 | E3 ubiquitin-protein ligase MARCH5   | unknown           | 34.99  | -2.99  | FALSE | TRUE  | FALSE |
| 1863 | Q9UJ68 | Mitochondrial peptide methionine s   | unknown           | 18.42  | -3.14  | FALSE | TRUE  | FALSE |
| 1864 | Q969N2 | GPI transamidase component PIG-T     | ER                | 1.86   | 33.43  | FALSE | TRUE  | TRUE  |
| 1865 | Q9H4M9 | EH domain-containing protein 1       | unknown           | -18.63 | 10.42  | TRUE  | TRUE  | TRUE  |
| 1866 | A6NDG6 | Glycerol-3-phosphate phosphatase     | CYTOSOL           | 17.94  | 16.43  | FALSE | TRUE  | TRUE  |
| 1867 | Q13765 | Nascent polypeptide-associated co    | unknown           | 11.59  | -7.34  | TRUE  | FALSE | TRUE  |
| 1868 | O60244 | Mediator of RNA polymerase II tran   | NUCLEUS           | -1.68  | -30.81 | FALSE | TRUE  | TRUE  |
| 1869 | P31937 | 3-hydroxyisobutyrate dehydrogena     | MITOCHONDRIA      | 36.97  | -3.40  | FALSE | TRUE  | TRUE  |
| 1870 | Q9BTW9 | Tubulin-specific chaperone D         | unknown           | 19.59  | 14.97  | FALSE | TRUE  | TRUE  |
| 1871 | Q96CU9 | FAD-dependent oxidoreductase do      | MITOCHONDRIA      | 34.80  | -14.33 | FALSE | TRUE  | FALSE |
| 1872 | Q29RF7 | Sister chromatid cohesion protein P  | unknown           | -16.11 | -21.53 | TRUE  | TRUE  | TRUE  |
| 1873 | O75832 | 26S proteasome non-ATPase regul      | PROTEASOME        | 18.11  | 21.40  | FALSE | TRUE  | TRUE  |
| 1874 | O95391 | Pre-mRNA-splicing factor SLU7        | NUCLEUS           | -5.49  | -37.41 | TRUE  | TRUE  | TRUE  |
| 1875 | O96028 | Histone-lysine N-methyltransferase   | NUCLEUS-CHROMATIN | -19.50 | -15.76 | FALSE | TRUE  | TRUE  |
| 1876 | Q96MX6 | WD repeat-containing protein 92      | unknown           | 6.12   | -21.59 | FALSE | TRUE  | FALSE |
| 1877 | P22307 | Non-specific lipid-transfer protein  | PEROXISOME        | 52.99  | -3.59  | FALSE | TRUE  | TRUE  |
| 1878 | Q99700 | Ataxin-2                             | unknown           | 6.42   | -22.18 | FALSE | TRUE  | FALSE |
| 1879 | Q6PK04 | Coiled-coil domain-containing prote  | NUCLEUS           | 1.49   | -29.41 | FALSE | TRUE  | TRUE  |
| 1880 | Q8IYU8 | Calcium uptake protein 2, mitochon   | unknown           | 28.69  | -12.26 | FALSE | TRUE  | FALSE |
| 1881 | Q9P0I2 | ER membrane protein complex sub      | ER                | 4.24   | 36.00  | FALSE | TRUE  | FALSE |
| 1882 | Q5VWQ0 | Lysine-specific demethylase 9        | NUCLEUS           | 0.05   | -30.06 | FALSE | TRUE  | TRUE  |
| 1883 | Q9UNF0 | Protein kinase C and casein kinase   | unknown           | -17.30 | 11.77  | TRUE  | TRUE  | FALSE |
| 1884 | O60763 | General vesicular transport factor p | unknown           | 19.13  | 15.85  | FALSE | TRUE  | TRUE  |
| 1885 | O76031 | ATP-dependent Clp protease ATP-b     | MITOCHONDRIA      | 38.14  | -9.51  | FALSE | TRUE  | TRUE  |
| 1886 | O00764 | Pyridoxal kinase                     | unknown           | 24.75  | 24.67  | FALSE | TRUE  | FALSE |
| 1887 | P36551 | Oxygen-dependent coproporphyrin      | MITOCHONDRIA      | 40.12  | -9.03  | FALSE | TRUE  | FALSE |
| 1888 | Q14CX7 | N-alpha-acetyltransferase 25, NatB   | unknown           | 5.11   | -19.46 | FALSE | TRUE  | FALSE |
| 1889 | O75592 | E3 ubiquitin-protein ligase MYCBP2   | unknown           | 4.26   | -15.02 | FALSE | TRUE  | TRUE  |
| 1890 | Q9NUL3 | Double-stranded RNA-binding prote    | unknown           | 6.53   | -19.53 | TRUE  | TRUE  | TRUE  |
| 1891 | Q9NUI1 | Peroxisomal 2,4-dienoyl-CoA reduct   | PEROXISOME        | 52.47  | -3.43  | FALSE | TRUE  | FALSE |
| 1892 | Q9NZJ4 | Sacsin                               | unknown           | 7.52   | -20.71 | FALSE | TRUE  | FALSE |
| 1893 | P62993 | Growth factor receptor-bound prote   | unknown           | 8.87   | 13.90  | FALSE | TRUE  | TRUE  |
| 1894 | Q9HC07 | Transmembrane protein 165            | unknown           | -20.95 | 30.91  | FALSE | TRUE  | TRUE  |
| 1895 | P17706 | Tyrosine-protein phosphatase non-    | unknown           | -0.46  | 26.70  | FALSE | TRUE  | TRUE  |
| 1896 | O75818 | Ribonuclease P protein subunit p40   | NUCLEUS           | -1.21  | -26.00 | FALSE | TRUE  | FALSE |

|      |        |                                               |                   |        |        |       |       |       |
|------|--------|-----------------------------------------------|-------------------|--------|--------|-------|-------|-------|
| 1897 | O60502 | Protein O-GlcNAcase                           | unknown           | 15.97  | 14.97  | FALSE | TRUE  | FALSE |
| 1898 | P61204 | ADP-ribosylation factor 3                     | unknown           | 18.46  | 11.16  | TRUE  | FALSE | TRUE  |
| 1899 | Q9NRV9 | Heme-binding protein 1                        | unknown           | 19.73  | -2.81  | FALSE | TRUE  | TRUE  |
| 1900 | Q86X10 | Ral GTPase-activating protein subunit         | unknown           | -7.15  | -6.58  | FALSE | TRUE  | FALSE |
| 1901 | Q8IX18 | Probable ATP-dependent RNA helicase           | NUCLEUS           | -0.76  | -24.90 | FALSE | TRUE  | FALSE |
| 1902 | Q9H9J2 | 39S ribosomal protein L44, mitochondrial      | MITOCHONDRIA      | 42.94  | -6.80  | FALSE | TRUE  | FALSE |
| 1903 | Q5T8P6 | RNA-binding protein 26                        | NUCLEUS           | -3.08  | -31.91 | TRUE  | TRUE  | TRUE  |
| 1904 | Q8IX01 | SURP and G-patch domain-containing protein    | NUCLEUS           | -8.65  | -33.10 | TRUE  | TRUE  | TRUE  |
| 1905 | Q52LJ0 | Protein FAM98B                                | NUCLEUS           | 4.05   | -26.30 | FALSE | TRUE  | TRUE  |
| 1906 | Q9BSF4 | Mitochondrial import inner membrane           | MITOCHONDRIA      | 35.70  | -12.10 | FALSE | TRUE  | FALSE |
| 1907 | Q16718 | NADH dehydrogenase [ubiquinone]               | MITOCHONDRIA      | 31.74  | -13.04 | FALSE | TRUE  | FALSE |
| 1908 | Q9C0B5 | Palmitoyltransferase ZDHHC5                   | unknown           | -27.25 | 1.73   | TRUE  | FALSE | FALSE |
| 1909 | P12694 | 2-oxoisovalerate dehydrogenase subunit        | MITOCHONDRIA      | 34.27  | -7.96  | FALSE | TRUE  | FALSE |
| 1910 | Q9Y5Q8 | General transcription factor 3C polypeptide   | NUCLEUS           | -22.99 | -23.17 | FALSE | TRUE  | FALSE |
| 1911 | O14757 | Serine/threonine-protein kinase Chk1          | unknown           | 0.30   | -12.74 | FALSE | TRUE  | TRUE  |
| 1912 | Q96I99 | Succinate--CoA ligase [GDP-forming]           | MITOCHONDRIA      | 41.35  | -10.50 | FALSE | TRUE  | TRUE  |
| 1913 | P51398 | 28S ribosomal protein S29, mitochondrial      | MITOCHONDRIA      | 40.21  | -15.19 | FALSE | TRUE  | TRUE  |
| 1914 | P11717 | Cation-independent mannose-6-phosphate        | unknown           | -34.57 | 18.78  | TRUE  | TRUE  | TRUE  |
| 1915 | Q96RT1 | Erbin                                         | unknown           | -23.90 | 4.91   | TRUE  | TRUE  | TRUE  |
| 1916 | Q9H307 | Pinin                                         | NUCLEUS           | -4.94  | -39.86 | TRUE  | TRUE  | TRUE  |
| 1917 | O00401 | Neural Wiskott-Aldrich syndrome protein       | unknown           | 2.01   | -10.29 | TRUE  | TRUE  | TRUE  |
| 1918 | Q96HY7 | Probable 2-oxoglutarate dehydrogenase         | unknown           | 35.71  | -1.35  | FALSE | TRUE  | TRUE  |
| 1919 | O00411 | DNA-directed RNA polymerase, mitochondrial    | MITOCHONDRIA      | 29.46  | -13.58 | FALSE | TRUE  | FALSE |
| 1920 | O43688 | Phospholipid phosphatase 2                    | unknown           | -35.53 | 15.56  | FALSE | TRUE  | TRUE  |
| 1921 | Q13433 | Zinc transporter ZIP6                         | PM                | -21.61 | 10.90  | TRUE  | TRUE  | TRUE  |
| 1922 | P16333 | Cytoplasmic protein NCK1                      | unknown           | 3.88   | 0.88   | TRUE  | TRUE  | TRUE  |
| 1923 | O75530 | Polycomb protein EED                          | NUCLEUS-CHROMATIN | -16.99 | -16.80 | FALSE | TRUE  | TRUE  |
| 1924 | O14974 | Protein phosphatase 1 regulatory subunit      | unknown           | -2.79  | -0.45  | TRUE  | TRUE  | TRUE  |
| 1925 | Q8WW59 | SPRY domain-containing protein 4              | MITOCHONDRIA      | 43.80  | -11.14 | FALSE | TRUE  | TRUE  |
| 1926 | Q32MZ4 | Leucine-rich repeat flightless-interactor     | unknown           | 15.57  | 5.60   | TRUE  | TRUE  | TRUE  |
| 1927 | P04626 | Receptor tyrosine-protein kinase erbB         | PM                | -27.08 | 1.63   | TRUE  | FALSE | TRUE  |
| 1928 | Q7Z3B4 | Nucleoporin p54                               | NUCLEUS           | -21.12 | -29.57 | FALSE | TRUE  | FALSE |
| 1929 | Q9Y4A5 | Transformation/transcription domain           | unknown           | -10.40 | -22.12 | FALSE | TRUE  | TRUE  |
| 1930 | Q86VI3 | Ras GTPase-activating-like protein 1          | unknown           | -8.59  | 6.78   | FALSE | TRUE  | FALSE |
| 1931 | P06756 | Integrin alpha-V                              | PM                | -26.58 | 14.13  | FALSE | TRUE  | TRUE  |
| 1932 | Q9Y6N5 | Sulfide:quinone oxidoreductase, mitochondrial | MITOCHONDRIA      | 36.39  | -4.25  | FALSE | TRUE  | TRUE  |
| 1933 | Q9Y6R0 | Numb-like protein                             | unknown           | -9.62  | 2.57   | TRUE  | FALSE | TRUE  |
| 1934 | P84101 | Small EDRK-rich factor 2                      | NUCLEUS           | -6.40  | -19.27 | FALSE | TRUE  | TRUE  |

|      |        |                                                  |                   |        |        |       |       |       |
|------|--------|--------------------------------------------------|-------------------|--------|--------|-------|-------|-------|
| 1935 | P43304 | Glycerol-3-phosphate dehydrogenase               | MITOCHONDRIA      | 43.43  | -11.01 | FALSE | TRUE  | TRUE  |
| 1936 | P07602 | Prosaposin                                       | unknown           | -34.46 | 18.16  | FALSE | TRUE  | TRUE  |
| 1937 | Q9UDY2 | Tight junction protein ZO-2                      | unknown           | -7.32  | 7.36   | TRUE  | TRUE  | TRUE  |
| 1938 | Q14674 | Separin                                          | unknown           | -4.04  | -1.24  | FALSE | TRUE  | TRUE  |
| 1939 | Q9P2R3 | Rabankyrin-5                                     | unknown           | 3.80   | 1.74   | FALSE | TRUE  | FALSE |
| 1940 | P13674 | Prolyl 4-hydroxylase subunit alpha-              | unknown           | 4.30   | 39.69  | FALSE | TRUE  | TRUE  |
| 1941 | O95396 | Adenylyltransferase and sulfurtransferase        | unknown           | 16.16  | 13.62  | FALSE | TRUE  | TRUE  |
| 1942 | Q9H8V3 | Protein ECT2                                     | unknown           | 4.24   | -18.74 | FALSE | TRUE  | FALSE |
| 1943 | Q7Z7H8 | 39S ribosomal protein L10, mitochondrial         | MITOCHONDRIA      | 42.81  | -4.76  | FALSE | TRUE  | FALSE |
| 1944 | Q96SK2 | Transmembrane protein 209                        | unknown           | 23.68  | -12.29 | FALSE | TRUE  | FALSE |
| 1945 | Q15477 | Helicase SKI2W                                   | unknown           | 8.34   | -20.74 | FALSE | TRUE  | TRUE  |
| 1946 | Q9NQS3 | Nectin-3                                         | unknown           | -21.70 | 15.70  | TRUE  | FALSE | FALSE |
| 1947 | O15091 | Mitochondrial ribonuclease P catalytic subunit   | MITOCHONDRIA      | 29.87  | -12.52 | FALSE | TRUE  | FALSE |
| 1948 | Q6NUM9 | All-trans-retinol 13,14-reductase                | ER                | -5.84  | 33.13  | FALSE | TRUE  | FALSE |
| 1949 | P41214 | Eukaryotic translation initiation factor 4E      | unknown           | 1.82   | -16.13 | FALSE | TRUE  | TRUE  |
| 1950 | O60499 | Syntaxin-10                                      | unknown           | -35.06 | 14.25  | TRUE  | FALSE | FALSE |
| 1951 | O60942 | mRNA-capping enzyme                              | unknown           | 0.16   | -14.30 | FALSE | TRUE  | TRUE  |
| 1952 | Q96GK7 | Fumarylacetoacetate hydrolase domain             | unknown           | 22.06  | -3.76  | FALSE | TRUE  | FALSE |
| 1953 | O95104 | Splicing factor, arginine/serine-rich 1          | NUCLEUS           | 1.25   | -33.59 | FALSE | TRUE  | FALSE |
| 1954 | O95235 | Kinesin-like protein KIF20A                      | unknown           | -17.70 | -14.16 | FALSE | TRUE  | TRUE  |
| 1955 | Q6NW34 | Nucleolus and neural progenitor protein          | NUCLEUS           | -4.63  | -30.81 | FALSE | TRUE  | TRUE  |
| 1956 | Q8NBK3 | Sulfatase-modifying factor 1                     | unknown           | -5.37  | 26.17  | FALSE | FALSE | TRUE  |
| 1957 | Q96ME7 | Zinc finger protein 512                          | NUCLEUS-CHROMATIN | -19.31 | -14.85 | TRUE  | TRUE  | TRUE  |
| 1958 | Q92995 | Ubiquitin carboxyl-terminal hydrolase 1          | unknown           | 17.46  | 9.14   | FALSE | TRUE  | TRUE  |
| 1959 | Q12768 | WASH complex subunit 5                           | unknown           | -14.37 | 9.11   | TRUE  | TRUE  | TRUE  |
| 1960 | Q6DKJ4 | Nucleoredoxin                                    | unknown           | 10.59  | 6.29   | FALSE | TRUE  | TRUE  |
| 1961 | P82912 | 28S ribosomal protein S11, mitochondrial         | MITOCHONDRIA      | 39.97  | -5.31  | FALSE | TRUE  | FALSE |
| 1962 | Q9Y2Z4 | Tyrosine--tRNA ligase, mitochondrial             | MITOCHONDRIA      | 30.30  | -15.19 | FALSE | TRUE  | FALSE |
| 1963 | Q6P1N0 | Coiled-coil and C2 domain-containing protein     | unknown           | 3.93   | -14.72 | FALSE | TRUE  | FALSE |
| 1964 | P36543 | V-type proton ATPase subunit E 1                 | unknown           | -17.01 | 5.10   | FALSE | TRUE  | FALSE |
| 1965 | Q9Y223 | Bifunctional UDP-N-acetylglucosamine 4-epimerase | unknown           | 8.92   | 2.44   | FALSE | TRUE  | FALSE |
| 1966 | O95671 | N-acetylserotonin O-methyltransferase            | unknown           | 10.71  | 9.49   | FALSE | TRUE  | TRUE  |
| 1967 | Q68CZ2 | Tensin-3                                         | unknown           | -4.64  | 6.16   | TRUE  | TRUE  | TRUE  |
| 1968 | Q9NZC9 | SWI/SNF-related matrix-associated nuclear factor | unknown           | -11.65 | -15.64 | FALSE | TRUE  | FALSE |
| 1969 | Q6YP21 | Kynurenine--oxoglutarate transaminase            | unknown           | 21.16  | -3.64  | FALSE | TRUE  | FALSE |
| 1970 | Q03164 | Histone-lysine N-methyltransferase               | unknown           | -17.83 | -13.81 | TRUE  | TRUE  | TRUE  |
| 1971 | Q96L91 | E1A-binding protein p400                         | unknown           | -10.77 | -22.33 | TRUE  | TRUE  | TRUE  |
| 1972 | Q92738 | USP6 N-terminal-like protein                     | unknown           | -27.93 | 0.00   | TRUE  | FALSE | TRUE  |

|      |        |                                                                       |              |        |        |       |       |       |
|------|--------|-----------------------------------------------------------------------|--------------|--------|--------|-------|-------|-------|
| 1973 | P04150 | Glucocorticoid receptor                                               | NUCLEUS      | 10.53  | 0.04   | TRUE  | TRUE  | TRUE  |
| 1974 | O15321 | Transmembrane 9 superfamily member                                    | unknown      | -21.86 | 31.50  | FALSE | FALSE | TRUE  |
| 1975 | O75717 | WD repeat and HMG-box DNA-binding protein                             | NUCLEUS      | -8.82  | -14.68 | TRUE  | FALSE | TRUE  |
| 1976 | Q9BSJ2 | Gamma-tubulin complex component                                       | unknown      | 6.24   | -24.80 | FALSE | TRUE  | FALSE |
| 1977 | P08134 | Rho-related GTP-binding protein RhoA                                  | unknown      | -18.68 | 2.91   | FALSE | FALSE | TRUE  |
| 1978 | Q12913 | Receptor-type tyrosine-protein phosphatase                            | PM           | -26.99 | 10.87  | TRUE  | FALSE | TRUE  |
| 1979 | P16144 | Integrin beta-4                                                       | PM           | -25.54 | 7.33   | FALSE | TRUE  | TRUE  |
| 1980 | Q96BN8 | Ubiquitin thioesterase otulin                                         | CYTOSOL      | 16.98  | 9.64   | FALSE | TRUE  | TRUE  |
| 1981 | Q9H2V7 | Protein spinster homolog 1                                            | unknown      | -35.41 | 8.83   | FALSE | TRUE  | TRUE  |
| 1982 | O00161 | Synaptosomal-associated protein 2                                     | PM           | -23.19 | 16.37  | TRUE  | FALSE | TRUE  |
| 1983 | Q9Y3L5 | Ras-related protein Rap-2c                                            | unknown      | -28.08 | 1.80   | FALSE | TRUE  | FALSE |
| 1984 | O95721 | Synaptosomal-associated protein 2                                     | PM           | -22.29 | 11.67  | TRUE  | FALSE | TRUE  |
| 1985 | Q15042 | Rab3 GTPase-activating protein catalytic subunit                      | unknown      | 3.97   | 10.62  | FALSE | TRUE  | FALSE |
| 1986 | Q86YP4 | Transcriptional repressor p66-alpha                                   | NUCLEUS      | -23.94 | -26.67 | TRUE  | TRUE  | TRUE  |
| 1987 | Q27J81 | Inverted formin-2                                                     | NUCLEUS      | 1.91   | -2.36  | TRUE  | TRUE  | TRUE  |
| 1988 | Q08AF3 | Schlafen family member 5                                              | unknown      | -12.11 | -11.22 | FALSE | TRUE  | FALSE |
| 1989 | Q96BI3 | Gamma-secretase subunit APH-1A                                        | unknown      | -16.08 | 16.67  | FALSE | TRUE  | FALSE |
| 1990 | Q9ULC3 | Ras-related protein Rab-23                                            | PM           | -23.08 | 10.73  | TRUE  | TRUE  | FALSE |
| 1991 | P07951 | Tropomyosin beta chain                                                | unknown      | 11.14  | 11.51  | FALSE | FALSE | TRUE  |
| 1992 | P08397 | Porphobilinogen deaminase                                             | CYTOSOL      | 18.60  | 21.36  | FALSE | TRUE  | FALSE |
| 1993 | Q13443 | Disintegrin and metalloproteinase with thrombospondin type 1 motifs 1 | PM           | -30.71 | 6.70   | TRUE  | TRUE  | TRUE  |
| 1994 | Q8WX93 | Palladin                                                              | unknown      | -6.17  | -1.43  | TRUE  | FALSE | TRUE  |
| 1995 | Q07617 | Sperm-associated antigen 1                                            | unknown      | -17.79 | 8.08   | TRUE  | FALSE | TRUE  |
| 1996 | Q9Y6M7 | Sodium bicarbonate cotransporter 3                                    | unknown      | -23.80 | 3.89   | TRUE  | FALSE | TRUE  |
| 1997 | P26572 | Alpha-1,3-mannosyl-glycoprotein 2                                     | GOLGI        | -18.74 | 32.51  | FALSE | TRUE  | FALSE |
| 1998 | Q7Z5K2 | Wings apart-like protein homolog                                      | NUCLEUS      | -25.16 | -26.20 | TRUE  | FALSE | TRUE  |
| 1999 | Q8IZL8 | Proline-, glutamic acid- and leucine- aminopeptidase                  | NUCLEUS      | 1.14   | -34.88 | FALSE | TRUE  | TRUE  |
| 2000 | P16278 | Beta-galactosidase                                                    | LYSOSOME     | -40.54 | 6.72   | FALSE | TRUE  | FALSE |
| 2001 | Q9Y6M9 | NADH dehydrogenase [ubiquinone]                                       | MITOCHONDRIA | 30.31  | -13.68 | FALSE | TRUE  | FALSE |
| 2002 | Q9BYJ9 | YTH domain-containing family protein                                  | unknown      | 4.57   | -23.00 | TRUE  | FALSE | FALSE |
| 2003 | Q9HD26 | Golgi-associated PDZ and coiled-coil domain protein                   | unknown      | 3.53   | 0.18   | TRUE  | FALSE | TRUE  |
| 2004 | Q8NC60 | Nitric oxide-associated protein 1                                     | MITOCHONDRIA | 39.92  | -7.40  | FALSE | TRUE  | TRUE  |
| 2005 | Q92783 | Signal transducing adapter molecule 1                                 | unknown      | 2.48   | 12.03  | TRUE  | FALSE | FALSE |
| 2006 | P48735 | Isocitrate dehydrogenase [NADP], mitochondrial                        | MITOCHONDRIA | 43.13  | -7.47  | FALSE | TRUE  | FALSE |
| 2007 | Q92974 | Rho guanine nucleotide exchange factor                                | unknown      | 1.63   | -13.21 | FALSE | TRUE  | TRUE  |
| 2008 | Q9BVG9 | Phosphatidylserine synthase 2                                         | unknown      | -6.49  | 22.21  | FALSE | TRUE  | TRUE  |
| 2009 | P23229 | Integrin alpha-6                                                      | unknown      | -32.18 | 11.13  | TRUE  | TRUE  | TRUE  |
| 2010 | Q9Y5T5 | Ubiquitin carboxyl-terminal hydrolase                                 | unknown      | 0.41   | -22.03 | FALSE | TRUE  | FALSE |

|      |        |                                      |                   |        |        |       |       |       |
|------|--------|--------------------------------------|-------------------|--------|--------|-------|-------|-------|
| 2011 | Q6P9B6 | TLD domain-containing protein 1      | unknown           | -22.43 | 6.74   | FALSE | TRUE  | FALSE |
| 2012 | P51812 | Ribosomal protein S6 kinase alpha-   | unknown           | 4.10   | 5.83   | FALSE | TRUE  | TRUE  |
| 2013 | Q9ULJ7 | Ankyrin repeat domain-containing p   | unknown           | -5.10  | 6.56   | TRUE  | FALSE | TRUE  |
| 2014 | Q15819 | Ubiquitin-conjugating enzyme E2 v    | unknown           | 11.88  | 12.02  | FALSE | FALSE | TRUE  |
| 2015 | P14678 | Small nuclear ribonucleoprotein-ass  | NUCLEUS           | 4.96   | -34.86 | FALSE | FALSE | TRUE  |
| 2016 | P04920 | Anion exchange protein 2             | PM                | -24.32 | 6.58   | TRUE  | FALSE | TRUE  |
| 2017 | Q96A65 | Exocyst complex component 4          | unknown           | -7.26  | 0.69   | TRUE  | TRUE  | TRUE  |
| 2018 | Q04721 | Neurogenic locus notch homolog pr    | unknown           | -19.62 | 13.24  | TRUE  | TRUE  | TRUE  |
| 2019 | P18084 | Integrin beta-5                      | PM                | -23.07 | 15.23  | TRUE  | FALSE | TRUE  |
| 2020 | Q9P0K7 | Ankycorbin                           | unknown           | -2.64  | 5.13   | TRUE  | FALSE | TRUE  |
| 2021 | Q9P0K7 | Ankycorbin                           | unknown           | -2.84  | 4.23   | TRUE  | FALSE | TRUE  |
| 2022 | Q96JM3 | Chromosome alignment-maintainir      | NUCLEUS           | -23.50 | -27.20 | TRUE  | FALSE | FALSE |
| 2023 | Q9H223 | EH domain-containing protein 4       | unknown           | -10.94 | 11.94  | TRUE  | TRUE  | FALSE |
| 2024 | P50750 | Cyclin-dependent kinase 9            | NUCLEUS           | 3.85   | -31.32 | FALSE | FALSE | TRUE  |
| 2025 | Q658P3 | Metalloreductase STEAP3              | unknown           | -34.37 | 11.31  | TRUE  | FALSE | FALSE |
| 2026 | Q8IZT6 | Abnormal spindle-like microcephaly   | unknown           | 0.20   | -14.18 | FALSE | TRUE  | FALSE |
| 2027 | Q15057 | Arf-GAP with coiled-coil, ANK repea  | unknown           | -7.25  | 4.33   | FALSE | TRUE  | TRUE  |
| 2028 | Q9NYV4 | Cyclin-dependent kinase 12           | NUCLEUS           | 3.56   | -32.40 | TRUE  | FALSE | TRUE  |
| 2029 | O95155 | Ubiquitin conjugation factor E4 B    | unknown           | 10.72  | 11.01  | FALSE | TRUE  | FALSE |
| 2030 | Q13492 | Phosphatidylinositol-binding clathri | unknown           | -5.41  | -9.20  | TRUE  | FALSE | TRUE  |
| 2031 | O95239 | Chromosome-associated kinesin KI     | NUCLEUS-CHROMATIN | -20.98 | -12.38 | TRUE  | FALSE | TRUE  |
| 2032 | Q9H0V1 | Transmembrane protein 168            | unknown           | -22.29 | 29.22  | FALSE | TRUE  | TRUE  |
| 2033 | Q86YZ3 | Hornerin                             | unknown           | -2.16  | 11.78  | FALSE | FALSE | TRUE  |
| 2034 | P54725 | UV excision repair protein RAD23 ho  | unknown           | 13.26  | 24.72  | FALSE | FALSE | TRUE  |
| 2035 | O60645 | Exocyst complex component 3          | unknown           | -7.40  | 0.51   | TRUE  | FALSE | FALSE |
| 2036 | Q96Q45 | Transmembrane protein 237            | unknown           | -17.47 | 13.20  | TRUE  | FALSE | FALSE |
| 2037 | Q9UIQ6 | Leucyl-cystinyl aminopeptidase       | unknown           | -35.81 | 14.57  | TRUE  | FALSE | FALSE |
| 2038 | P23434 | Glycine cleavage system H protein,   | MITOCHONDRIA      | 33.46  | -8.18  | FALSE | FALSE | TRUE  |
| 2039 | Q8IWZ3 | Ankyrin repeat and KH domain-con     | unknown           | 8.56   | -13.07 | TRUE  | FALSE | TRUE  |
| 2040 | P83916 | Chromobox protein homolog 1          | NUCLEUS           | -15.95 | -29.62 | TRUE  | FALSE | TRUE  |
| 2041 | P51003 | Poly(A) polymerase alpha             | unknown           | 18.23  | 5.37   | FALSE | TRUE  | FALSE |
| 2042 | P63096 | Guanine nucleotide-binding protein   | unknown           | -28.99 | 10.20  | FALSE | FALSE | TRUE  |
| 2043 | Q86W92 | Liprin-beta-1                        | unknown           | -2.40  | 0.59   | TRUE  | FALSE | TRUE  |
| 2044 | Q6UW63 | KDEL motif-containing protein 1      | unknown           | -0.98  | 38.03  | FALSE | TRUE  | TRUE  |
| 2045 | Q01469 | Fatty acid-binding protein, epiderm  | unknown           | 19.13  | 24.17  | TRUE  | FALSE | TRUE  |
| 2046 | Q2PPJ7 | Ral GTPase-activating protein subu   | unknown           | -5.94  | 3.05   | FALSE | FALSE | TRUE  |
| 2047 | Q96PD2 | Discoidin, CUB and LCCL domain-cor   | PM                | -26.27 | 1.82   | TRUE  | FALSE | TRUE  |
| 2048 | Q9BZF9 | Uveal autoantigen with coiled-coil c | unknown           | -2.26  | 4.21   | TRUE  | FALSE | TRUE  |

|      |        |                                       |                   |        |        |       |       |       |
|------|--------|---------------------------------------|-------------------|--------|--------|-------|-------|-------|
| 2049 | P46531 | Neurogenic locus notch homolog pr     | unknown           | -24.02 | 6.49   | TRUE  | FALSE | TRUE  |
| 2050 | Q9UJF2 | Ras GTPase-activating protein nGA     | unknown           | -6.23  | 3.08   | TRUE  | FALSE | TRUE  |
| 2051 | Q96R06 | Sperm-associated antigen 5            | NUCLEUS           | -0.99  | -5.08  | TRUE  | FALSE | FALSE |
| 2052 | Q9BY42 | Protein RTF2 homolog                  | NUCLEUS           | -12.46 | -15.47 | TRUE  | TRUE  | TRUE  |
| 2053 | Q92609 | TBC1 domain family member 5           | unknown           | -12.59 | 5.94   | TRUE  | FALSE | FALSE |
| 2054 | Q9Y4W6 | AFG3-like protein 2                   | MITOCHONDRIA      | 34.26  | -11.68 | FALSE | TRUE  | FALSE |
| 2055 | P35240 | Merlin                                | unknown           | -17.21 | 13.49  | TRUE  | FALSE | TRUE  |
| 2056 | Q15334 | Lethal(2) giant larvae protein homo   | unknown           | -20.36 | 5.39   | TRUE  | FALSE | TRUE  |
| 2057 | P60903 | Protein S100-A10                      | unknown           | -11.11 | 30.31  | FALSE | FALSE | TRUE  |
| 2058 | Q01974 | Tyrosine-protein kinase transmembr    | PM                | -25.69 | 3.54   | TRUE  | FALSE | TRUE  |
| 2059 | Q8IW52 | SLIT and NTRK-like protein 4          | unknown           | -20.21 | 10.94  | TRUE  | FALSE | TRUE  |
| 2060 | O96013 | Serine/threonine-protein kinase PA    | unknown           | -5.65  | -1.21  | TRUE  | FALSE | TRUE  |
| 2061 | Q9H7C9 | Mth938 domain-containing protein      | unknown           | 18.83  | 11.29  | TRUE  | FALSE | FALSE |
| 2062 | O75976 | Carboxypeptidase D                    | unknown           | -36.13 | 14.02  | TRUE  | FALSE | TRUE  |
| 2063 | Q9HCS7 | Pre-mRNA-splicing factor SYF1         | NUCLEUS           | -3.73  | -38.89 | TRUE  | FALSE | TRUE  |
| 2064 | Q99986 | Serine/threonine-protein kinase VR    | NUCLEUS-CHROMATIN | -19.22 | -13.92 | FALSE | TRUE  | FALSE |
| 2065 | P63092 | Guanine nucleotide-binding protein    | unknown           | -23.58 | 18.03  | FALSE | FALSE | TRUE  |
| 2066 | Q9Y618 | Nuclear receptor corepressor 2        | NUCLEUS           | -2.30  | -31.59 | TRUE  | FALSE | FALSE |
| 2067 | Q53LP3 | Ankyrin repeat domain-containing p    | unknown           | 2.58   | 4.29   | TRUE  | FALSE | TRUE  |
| 2068 | P01892 | HLA class I histocompatibility antige | PM                | -27.65 | 12.19  | TRUE  | FALSE | TRUE  |
| 2069 | Q9NRL2 | Bromodomain adjacent to zinc finger   | unknown           | -21.81 | -20.13 | FALSE | FALSE | TRUE  |
| 2070 | Q5T5Y3 | Calmodulin-regulated spectrin-asso    | NUCLEUS           | -9.96  | -6.60  | TRUE  | FALSE | FALSE |
| 2071 | Q9NZN8 | CCR4-NOT transcription complex su     | unknown           | 8.48   | -25.69 | TRUE  | FALSE | FALSE |
| 2072 | O75477 | Erlin-1                               | ER                | -9.19  | 31.83  | FALSE | FALSE | TRUE  |
| 2073 | Q56VL3 | OCIA domain-containing protein 2      | MITOCHONDRIA      | 31.64  | -12.90 | FALSE | TRUE  | FALSE |
| 2074 | Q15599 | Na(+)/H(+) exchange regulatory cot    | unknown           | -24.04 | 4.18   | TRUE  | FALSE | FALSE |
| 2075 | P55011 | Solute carrier family 12 member 2     | PM                | -26.66 | 16.38  | TRUE  | FALSE | FALSE |
| 2076 | Q9P2N5 | RNA-binding protein 27                | NUCLEUS           | -0.55  | -32.68 | TRUE  | FALSE | TRUE  |
| 2077 | Q9UQB8 | Brain-specific angiogenesis inhibitor | unknown           | -8.04  | 13.98  | TRUE  | FALSE | FALSE |
| 2078 | Q15811 | Intersectin-1                         | unknown           | -5.69  | 8.46   | TRUE  | FALSE | FALSE |
| 2079 | P06213 | Insulin receptor                      | PM                | -24.28 | 12.46  | TRUE  | FALSE | FALSE |
| 2080 | Q96JM7 | Lethal(3)malignant brain tumor-like   | unknown           | -33.51 | -1.84  | TRUE  | FALSE | FALSE |
| 2081 | Q9H2U1 | ATP-dependent RNA helicase DHX3       | NUCLEUS           | -0.91  | -22.78 | FALSE | TRUE  | TRUE  |
| 2082 | P28799 | Granulins                             | unknown           | -37.53 | 13.48  | FALSE | FALSE | TRUE  |
| 2083 | P60468 | Protein transport protein Sec61 sub   | ER                | 2.37   | 29.35  | FALSE | FALSE | TRUE  |
| 2084 | O15440 | Multidrug resistance-associated pro   | PM                | -32.90 | 13.50  | TRUE  | FALSE | TRUE  |
| 2085 | P05165 | Propionyl-CoA carboxylase alpha ch    | MITOCHONDRIA      | 35.72  | -4.91  | TRUE  | FALSE | TRUE  |
| 2086 | Q96T37 | Putative RNA-binding protein 15       | NUCLEUS           | -1.16  | -34.92 | FALSE | TRUE  | TRUE  |

|      |        |                                        |                   |        |        |       |       |       |
|------|--------|----------------------------------------|-------------------|--------|--------|-------|-------|-------|
| 2087 | Q8NCN4 | E3 ubiquitin-protein ligase RNF169     | unknown           | -6.49  | -22.81 | TRUE  | FALSE | FALSE |
| 2088 | Q9BQ48 | 39S ribosomal protein L34, mitocho     | unknown           | 42.69  | -2.06  | TRUE  | FALSE | TRUE  |
| 2089 | Q9GZU8 | Protein FAM192A                        | unknown           | 27.42  | 23.04  | TRUE  | FALSE | FALSE |
| 2090 | O14925 | Mitochondrial import inner membra      | MITOCHONDRIA      | 36.22  | -1.24  | FALSE | FALSE | TRUE  |
| 2091 | Q7L2E3 | Putative ATP-dependent RNA helica      | unknown           | -7.93  | -3.13  | FALSE | TRUE  | TRUE  |
| 2092 | Q9Y520 | Protein PRRC2C                         | unknown           | 6.86   | -20.04 | TRUE  | FALSE | TRUE  |
| 2093 | P61769 | Beta-2-microglobulin                   | PM                | -27.94 | 12.67  | FALSE | FALSE | TRUE  |
| 2094 | O43432 | Eukaryotic translation initiation fact | unknown           | 4.74   | -18.46 | TRUE  | FALSE | TRUE  |
| 2095 | Q5UIP0 | Telomere-associated protein RIF1       | NUCLEUS-CHROMATIN | -20.84 | -15.11 | TRUE  | FALSE | TRUE  |
| 2096 | Q9P206 | Uncharacterized protein KIAA1522       | unknown           | -22.38 | 4.06   | TRUE  | FALSE | FALSE |
| 2097 | Q9Y2S6 | Translation machinery-associated p     | unknown           | -6.43  | -19.29 | FALSE | FALSE | TRUE  |
| 2098 | O75581 | Low-density lipoprotein receptor-re    | PM                | -34.21 | 3.93   | TRUE  | FALSE | FALSE |
| 2099 | O43663 | Protein regulator of cytokinesis 1     | unknown           | -15.97 | -12.51 | FALSE | TRUE  | FALSE |
| 2100 | Q9UPN3 | Microtubule-actin cross-linking fact   | unknown           | -3.54  | 2.40   | TRUE  | FALSE | TRUE  |
| 2101 | Q9UPN3 | Microtubule-actin cross-linking fact   | unknown           | -3.54  | 2.11   | TRUE  | FALSE | TRUE  |
| 2102 | Q6KC79 | Nipped-B-like protein                  | NUCLEUS-CHROMATIN | -21.24 | -13.69 | TRUE  | FALSE | TRUE  |
| 2103 | Q13873 | Bone morphogenetic protein recept      | PM                | -22.90 | 12.03  | TRUE  | FALSE | TRUE  |
| 2104 | Q9UGU0 | Transcription factor 20                | unknown           | -18.87 | -23.70 | TRUE  | FALSE | FALSE |
| 2105 | Q96RL1 | BRCA1-A complex subunit RAP80          | unknown           | -15.98 | -19.93 | TRUE  | FALSE | FALSE |
| 2106 | Q13190 | Syntaxin-5                             | unknown           | -11.11 | 32.25  | TRUE  | FALSE | FALSE |
| 2107 | P20674 | Cytochrome c oxidase subunit 5A, n     | MITOCHONDRIA      | 33.43  | -11.52 | FALSE | FALSE | TRUE  |
| 2108 | Q6P4E1 | Protein CASC4                          | GOLGI             | -21.12 | 31.65  | TRUE  | FALSE | FALSE |
| 2109 | Q06546 | GA-binding protein alpha chain         | NUCLEUS           | -15.89 | -28.51 | TRUE  | FALSE | FALSE |
| 2110 | Q99747 | Gamma-soluble NSF attachment pr        | unknown           | -33.35 | 14.48  | TRUE  | FALSE | FALSE |
| 2111 | Q96FZ7 | Charged multivesicular body protei     | PM                | -27.30 | 8.20   | TRUE  | FALSE | FALSE |
| 2112 | Q86YS7 | C2 domain-containing protein 5         | unknown           | -14.31 | 14.63  | TRUE  | FALSE | TRUE  |
| 2113 | P54252 | Ataxin-3                               | unknown           | 14.19  | 2.96   | TRUE  | FALSE | FALSE |
| 2114 | Q8IVF2 | Protein AHNAK2                         | unknown           | -10.50 | 23.14  | TRUE  | FALSE | TRUE  |
| 2115 | Q92733 | Proline-rich protein PRCC              | NUCLEUS           | -14.45 | -24.62 | TRUE  | FALSE | TRUE  |
| 2116 | Q86Y07 | Serine/threonine-protein kinase VR     | unknown           | 5.94   | 33.25  | FALSE | TRUE  | FALSE |
| 2117 | Q7L4I2 | Arginine/serine-rich coiled-coil prot  | NUCLEUS           | 1.55   | -28.08 | FALSE | FALSE | TRUE  |
| 2118 | Q9ULH0 | Kinase D-interacting substrate of 22   | unknown           | -19.91 | 15.57  | TRUE  | FALSE | TRUE  |
| 2119 | Q06787 | Synaptic functional regulator FMR1     | unknown           | 8.42   | -25.76 | FALSE | FALSE | TRUE  |
| 2120 | O75410 | Transforming acidic coiled-coil-cont   | unknown           | -3.73  | 12.74  | TRUE  | FALSE | TRUE  |
| 2121 | Q9C0C2 | 182 kDa tankyrase-1-binding prote      | NUCLEUS           | -1.02  | -4.69  | TRUE  | FALSE | TRUE  |
| 2122 | Q9Y4C4 | Malignant fibrous histiocytoma-am      | unknown           | -5.15  | 4.71   | FALSE | FALSE | TRUE  |
| 2123 | Q99618 | Cell division cycle-associated protei  | unknown           | -23.56 | 5.34   | TRUE  | FALSE | FALSE |
| 2124 | Q6UVK1 | Chondroitin sulfate proteoglycan 4     | PM                | -27.60 | 1.68   | TRUE  | FALSE | FALSE |



|      |        |                                      |              |        |        |       |       |       |
|------|--------|--------------------------------------|--------------|--------|--------|-------|-------|-------|
| 2125 | P33981 | Dual specificity protein kinase TTK  | unknown      | -5.33  | -9.03  | TRUE  | FALSE | TRUE  |
| 2126 | Q9BZD4 | Kinetochore protein Nuf2             | NUCLEUS      | -3.74  | -13.82 | FALSE | FALSE | TRUE  |
| 2127 | Q9P246 | Stromal interaction molecule 2       | ER           | -5.27  | 26.98  | TRUE  | FALSE | FALSE |
| 2128 | Q9UMZ2 | Synergism gamma                      | unknown      | -14.94 | 8.67   | TRUE  | FALSE | FALSE |
| 2129 | Q8WY22 | BRI3-binding protein                 | unknown      | 3.13   | 34.15  | FALSE | FALSE | TRUE  |
| 2130 | P07919 | Cytochrome b-c1 complex subunit 6    | MITOCHONDRIA | 42.37  | -2.98  | FALSE | FALSE | TRUE  |
| 2131 | Q8IWZ8 | SURP and G-patch domain-containing   | NUCLEUS      | -1.85  | -36.41 | TRUE  | FALSE | FALSE |
| 2132 | P27448 | MAP/microtubule affinity-regulating  | unknown      | 2.10   | -10.43 | TRUE  | FALSE | TRUE  |
| 2133 | Q9BRD0 | BUD13 homolog                        | NUCLEUS      | 2.78   | -33.54 | TRUE  | FALSE | FALSE |
| 2134 | Q92540 | Protein SMG7                         | unknown      | 2.06   | -14.27 | TRUE  | FALSE | FALSE |
| 2135 | O95466 | Formin-like protein 1                | unknown      | -13.77 | 14.55  | TRUE  | FALSE | FALSE |
| 2136 | Q9Y4B5 | Microtubule cross-linking factor 1   | unknown      | 0.63   | -10.23 | TRUE  | FALSE | FALSE |
| 2137 | O94854 | Uncharacterized protein KIAA0754     | unknown      | -10.57 | 23.51  | TRUE  | FALSE | FALSE |
| 2138 | Q9NPJ3 | Acyl-coenzyme A thioesterase 13      | unknown      | -4.98  | 20.05  | FALSE | FALSE | TRUE  |
| 2139 | O43765 | Small glutamine-rich tetrapeptide    | CYTOSOL      | 23.88  | 22.79  | FALSE | FALSE | TRUE  |
| 2140 | Q8N201 | Integrator complex subunit 1         | unknown      | -14.59 | -21.96 | TRUE  | FALSE | FALSE |
| 2141 | Q99471 | Prefoldin subunit 5                  | unknown      | 24.94  | 23.56  | FALSE | FALSE | TRUE  |
| 2142 | Q8NFX7 | Syntaxin-binding protein 6           | unknown      | -23.84 | 5.95   | TRUE  | FALSE | FALSE |
| 2143 | Q5T2T1 | MAGUK p55 subfamily member 7         | unknown      | -16.99 | 16.58  | TRUE  | FALSE | FALSE |
| 2144 | Q9NYJ8 | TGF-beta-activated kinase 1 and 2    | unknown      | -3.05  | 8.19   | TRUE  | FALSE | FALSE |
| 2145 | Q13123 | Protein Red                          | NUCLEUS      | -4.09  | -38.93 | TRUE  | FALSE | TRUE  |
| 2146 | Q9H6A9 | Pecanex-like protein 3               | unknown      | -17.06 | 14.49  | TRUE  | FALSE | TRUE  |
| 2147 | Q76FK4 | Nucleolar protein 8                  | NUCLEUS      | -4.19  | -36.31 | TRUE  | FALSE | TRUE  |
| 2148 | P09132 | Signal recognition particle 19 kDa p | unknown      | 5.33   | -4.06  | FALSE | FALSE | TRUE  |
| 2149 | O75937 | DnaJ homolog subfamily C member      | NUCLEUS      | -13.60 | -29.56 | FALSE | FALSE | TRUE  |
| 2150 | Q9ULJ8 | Neurabin-1                           | unknown      | -2.06  | 1.96   | TRUE  | FALSE | TRUE  |
| 2151 | Q96T23 | Remodeling and spacing factor 1      | NUCLEUS      | -15.63 | -29.26 | TRUE  | FALSE | FALSE |
| 2152 | Q14011 | Cold-inducible RNA-binding protein   | NUCLEUS      | -17.94 | -32.57 | FALSE | FALSE | TRUE  |
| 2153 | Q92797 | Symplekin                            | NUCLEUS      | -10.12 | -35.84 | FALSE | FALSE | TRUE  |
| 2154 | Q9H0G5 | Nuclear speckle splicing regulatory  | NUCLEUS      | -1.30  | -23.52 | TRUE  | FALSE | FALSE |
| 2155 | P61011 | Signal recognition particle 54 kDa p | unknown      | 5.20   | -4.20  | TRUE  | FALSE | FALSE |
| 2156 | O60568 | Procollagen-lysine,2-oxoglutarate 5  | ER           | 4.57   | 39.08  | FALSE | TRUE  | TRUE  |
| 2157 | Q8IUW5 | RELT-like protein 1                  | PM           | -24.23 | 4.53   | TRUE  | FALSE | FALSE |
| 2158 | Q14696 | LRP chaperone MESD                   | unknown      | -1.84  | 39.37  | FALSE | FALSE | TRUE  |
| 2159 | Q53EZ4 | Centrosomal protein of 55 kDa        | unknown      | 3.38   | -11.60 | TRUE  | FALSE | FALSE |
| 2160 | Q9HCE1 | Putative helicase MOV-10             | unknown      | 4.19   | -22.44 | FALSE | TRUE  | TRUE  |
| 2161 | Q96C24 | Synaptotagmin-like protein 4         | unknown      | -17.69 | 13.35  | TRUE  | FALSE | FALSE |
| 2162 | Q13098 | COP9 signalosome complex subunit     | unknown      | 19.48  | 11.74  | FALSE | FALSE | TRUE  |

|      |        |                                       |              |        |        |       |       |       |
|------|--------|---------------------------------------|--------------|--------|--------|-------|-------|-------|
| 2163 | Q9Y4E1 | WASH complex subunit 2C               | unknown      | -15.65 | 10.38  | TRUE  | FALSE | TRUE  |
| 2164 | Q96FQ6 | Protein S100-A16                      | NUCLEUS      | 2.38   | 6.19   | FALSE | FALSE | TRUE  |
| 2165 | Q08AD1 | Calmodulin-regulated spectrin-asso    | unknown      | -3.47  | -6.45  | TRUE  | FALSE | TRUE  |
| 2166 | P09669 | Cytochrome c oxidase subunit 6C       | MITOCHONDRIA | 27.53  | -10.73 | FALSE | FALSE | TRUE  |
| 2167 | Q9UHD9 | Ubiquilin-2                           | unknown      | 20.63  | 13.32  | FALSE | FALSE | TRUE  |
| 2168 | O43583 | Density-regulated protein             | unknown      | -11.60 | -10.79 | FALSE | FALSE | TRUE  |
| 2169 | Q96CB8 | Integrator complex subunit 12         | unknown      | -14.82 | -21.03 | TRUE  | FALSE | TRUE  |
| 2170 | O43760 | Synaptogyrin-2                        | PM           | -34.78 | 16.94  | FALSE | FALSE | TRUE  |
| 2171 | Q8TF68 | Zinc finger protein 384               | NUCLEUS      | -23.35 | -23.33 | TRUE  | FALSE | FALSE |
| 2172 | Q9Y6D5 | Brefeldin A-inhibited guanine nucle   | unknown      | -2.67  | -11.14 | TRUE  | FALSE | FALSE |
| 2173 | Q3V6T2 | Girdin                                | unknown      | -1.98  | -7.28  | TRUE  | FALSE | TRUE  |
| 2174 | P33240 | Cleavage stimulation factor subunit   | NUCLEUS      | -11.22 | -35.67 | FALSE | FALSE | TRUE  |
| 2175 | Q92917 | G-patch domain and KOW motifs-co      | NUCLEUS      | -14.79 | -29.97 | TRUE  | FALSE | TRUE  |
| 2176 | Q92520 | Protein FAM3C                         | unknown      | -22.34 | 30.75  | FALSE | FALSE | TRUE  |
| 2177 | Q8IWW6 | Rho GTPase-activating protein 12      | unknown      | -13.89 | 13.44  | TRUE  | FALSE | TRUE  |
| 2178 | O75915 | PRA1 family protein 3                 | unknown      | -2.80  | 28.72  | FALSE | FALSE | TRUE  |
| 2179 | Q9H9B1 | Histone-lysine N-methyltransferase    | unknown      | -22.85 | -18.48 | TRUE  | FALSE | TRUE  |
| 2180 | Q15032 | R3H domain-containing protein 1       | unknown      | 4.75   | -8.76  | TRUE  | FALSE | FALSE |
| 2181 | Q9H6X2 | Anthrax toxin receptor 1              | PM           | -32.62 | -0.64  | TRUE  | FALSE | TRUE  |
| 2182 | Q9Y333 | U6 snRNA-associated Sm-like prote     | NUCLEUS      | -9.95  | -30.57 | FALSE | FALSE | TRUE  |
| 2183 | P52943 | Cysteine-rich protein 2               | unknown      | -8.27  | 6.62   | TRUE  | FALSE | FALSE |
| 2184 | Q9Y217 | Myotubularin-related protein 6        | unknown      | 5.04   | -11.10 | TRUE  | FALSE | FALSE |
| 2185 | Q96QR8 | Transcriptional activator protein Pur | unknown      | 13.26  | 0.80   | TRUE  | FALSE | TRUE  |
| 2186 | Q99614 | Tetratricopeptide repeat protein 1    | unknown      | 17.11  | 14.16  | TRUE  | FALSE | TRUE  |
| 2187 | Q5T6F2 | Ubiquitin-associated protein 2        | unknown      | 8.22   | -21.32 | TRUE  | FALSE | TRUE  |
| 2188 | O75431 | Metaxin-2                             | unknown      | 28.77  | -14.90 | FALSE | FALSE | TRUE  |
| 2189 | Q9H501 | ESF1 homolog                          | NUCLEUS      | -4.94  | -38.69 | TRUE  | FALSE | FALSE |
| 2190 | Q13488 | V-type proton ATPase 116 kDa sub      | LYSOSOME     | -39.40 | 8.76   | TRUE  | FALSE | FALSE |
| 2191 | Q86VM9 | Zinc finger CCCH domain-containing    | NUCLEUS      | -12.78 | -28.73 | TRUE  | FALSE | TRUE  |
| 2192 | Q5JSZ5 | Protein PRRC2B                        | unknown      | 4.91   | -21.48 | TRUE  | FALSE | TRUE  |
| 2193 | Q9NZT2 | Opioid growth factor receptor         | unknown      | 15.44  | 23.24  | FALSE | FALSE | TRUE  |
| 2194 | P08174 | Complement decay-accelerating fa      | PM           | -23.23 | 16.81  | FALSE | FALSE | TRUE  |
| 2195 | O14907 | Tax1-binding protein 3                | unknown      | 3.78   | 0.93   | FALSE | FALSE | TRUE  |
| 2196 | Q9UNN5 | FAS-associated factor 1               | unknown      | 18.92  | 15.66  | FALSE | FALSE | TRUE  |
| 2197 | Q9UHB7 | AF4/FMR2 family member 4              | unknown      | -14.72 | -18.84 | TRUE  | FALSE | FALSE |
| 2198 | Q8IWI9 | MAX gene-associated protein           | NUCLEUS      | -24.18 | -22.73 | TRUE  | FALSE | FALSE |
| 2199 | P20962 | Parathymosin                          | unknown      | 27.15  | 19.40  | FALSE | FALSE | TRUE  |
| 2200 | Q9H6F5 | Coiled-coil domain-containing prote   | NUCLEUS      | -4.08  | -32.76 | FALSE | FALSE | TRUE  |

|      |        |                                         |                   |        |        |       |       |       |
|------|--------|-----------------------------------------|-------------------|--------|--------|-------|-------|-------|
| 2201 | Q8ND82 | Zinc finger protein 280C                | NUCLEUS-CHROMATIN | -21.37 | -14.60 | TRUE  | FALSE | TRUE  |
| 2202 | Q9HD33 | 39S ribosomal protein L47, mitocho      | MITOCHONDRIA      | 40.87  | -7.15  | FALSE | FALSE | TRUE  |
| 2203 | Q9Y2X7 | ARF GTPase-activating protein GIT2      | unknown           | -3.24  | -6.38  | TRUE  | FALSE | FALSE |
| 2204 | Q9UEY8 | Gamma-adducin                           | NUCLEUS           | -10.90 | -17.69 | TRUE  | FALSE | TRUE  |
| 2205 | P13861 | cAMP-dependent protein kinase ty        | unknown           | -19.70 | 5.65   | TRUE  | FALSE | TRUE  |
| 2206 | Q70E73 | Ras-associated and pleckstrin hom       | unknown           | -3.29  | 10.45  | TRUE  | FALSE | FALSE |
| 2207 | Q9NRX1 | RNA-binding protein PNO1                | NUCLEUS           | -0.88  | -37.21 | FALSE | FALSE | TRUE  |
| 2208 | O95630 | STAM-binding protein                    | unknown           | 9.94   | 14.21  | TRUE  | FALSE | FALSE |
| 2209 | Q13625 | Apoptosis-stimulating of p53 protei     | unknown           | -7.41  | 7.00   | TRUE  | FALSE | FALSE |
| 2210 | Q9H6S0 | Probable ATP-dependent RNA helic        | unknown           | 1.67   | -15.75 | FALSE | TRUE  | TRUE  |
| 2211 | Q9Y3D3 | 28S ribosomal protein S16, mitocho      | unknown           | 44.41  | -13.82 | FALSE | FALSE | TRUE  |
| 2212 | Q92576 | PHD finger protein 3                    | unknown           | -14.64 | -22.19 | TRUE  | FALSE | TRUE  |
| 2213 | Q9NUP9 | Protein lin-7 homolog C                 | unknown           | -21.30 | 11.06  | TRUE  | FALSE | FALSE |
| 2214 | Q8NHQ9 | ATP-dependent RNA helicase DDX5         | NUCLEUS           | 2.40   | -27.39 | TRUE  | FALSE | FALSE |
| 2215 | P84157 | Matrix-remodeling-associated prot       | unknown           | -9.11  | 35.38  | TRUE  | FALSE | FALSE |
| 2216 | Q12846 | Syntaxin-4                              | PM                | -24.54 | 15.69  | TRUE  | FALSE | FALSE |
| 2217 | Q8TEA8 | D-aminoacyl-tRNA deacylase 1            | unknown           | 8.93   | 0.70   | FALSE | FALSE | TRUE  |
| 2218 | Q92575 | UBX domain-containing protein 4         | unknown           | -12.49 | 29.80  | TRUE  | FALSE | TRUE  |
| 2219 | A2RU67 | Protein FAM234B                         | unknown           | -36.55 | 11.90  | TRUE  | FALSE | FALSE |
| 2220 | O43815 | Striatin                                | unknown           | -9.89  | 13.87  | TRUE  | FALSE | TRUE  |
| 2221 | Q15773 | Myeloid leukemia factor 2               | unknown           | -4.58  | -8.11  | FALSE | FALSE | TRUE  |
| 2222 | Q8TDM6 | Disks large homolog 5                   | unknown           | -8.58  | 1.60   | TRUE  | FALSE | TRUE  |
| 2223 | Q9H582 | Zinc finger protein 644                 | NUCLEUS-CHROMATIN | -22.25 | -18.11 | TRUE  | FALSE | FALSE |
| 2224 | P42892 | Endothelin-converting enzyme 1          | unknown           | -31.29 | 14.50  | TRUE  | FALSE | FALSE |
| 2225 | Q9GZL7 | Ribosome biogenesis protein WDR1        | NUCLEUS           | -9.59  | -31.19 | FALSE | FALSE | TRUE  |
| 2226 | Q8IWB9 | Testis-expressed protein 2              | unknown           | -11.72 | 28.79  | TRUE  | FALSE | FALSE |
| 2227 | Q7Z2T5 | TRMT1-like protein                      | NUCLEUS           | 0.70   | -24.75 | FALSE | FALSE | TRUE  |
| 2228 | Q15121 | Astrocytic phosphoprotein PEA-15        | unknown           | 14.01  | 23.58  | FALSE | FALSE | TRUE  |
| 2229 | Q13416 | Origin recognition complex subunit      | NUCLEUS-CHROMATIN | -22.28 | -17.10 | TRUE  | FALSE | TRUE  |
| 2230 | P29084 | Transcription initiation factor IIE sub | NUCLEUS           | -5.38  | -15.31 | TRUE  | FALSE | FALSE |
| 2231 | Q5VZK9 | F-actin-uncapping protein LRRC16A       | unknown           | -8.28  | 10.94  | TRUE  | FALSE | TRUE  |
| 2232 | O95835 | Serine/threonine-protein kinase LA      | unknown           | 0.49   | -9.28  | TRUE  | FALSE | FALSE |
| 2233 | P98175 | RNA-binding protein 10                  | NUCLEUS           | 4.77   | -32.69 | TRUE  | FALSE | TRUE  |
| 2234 | Q8WWK9 | Cytoskeleton-associated protein 2       | unknown           | -10.52 | -11.12 | FALSE | FALSE | TRUE  |
| 2235 | Q8TD16 | Protein bicaudal D homolog 2            | unknown           | -17.20 | 2.82   | TRUE  | FALSE | TRUE  |
| 2236 | Q7KZ85 | Transcription elongation factor SPT     | NUCLEUS           | -17.10 | -30.01 | FALSE | FALSE | TRUE  |
| 2237 | Q9H5V9 | UPF0428 protein CXorf56                 | NUCLEUS           | -1.94  | -26.80 | TRUE  | FALSE | TRUE  |
| 2238 | Q9UHY1 | Nuclear receptor-binding protein        | unknown           | 15.78  | 22.21  | FALSE | FALSE | TRUE  |

|      |        |                                      |         |        |        |       |       |       |
|------|--------|--------------------------------------|---------|--------|--------|-------|-------|-------|
| 2239 | Q9Y3C1 | Nucleolar protein 16                 | NUCLEUS | 2.07   | -36.20 | FALSE | FALSE | TRUE  |
| 2240 | Q7Z4V5 | Hepatoma-derived growth factor-re    | unknown | 13.32  | 24.88  | TRUE  | FALSE | FALSE |
| 2241 | Q86V48 | Leucine zipper protein 1             | unknown | -7.80  | -4.32  | TRUE  | FALSE | TRUE  |
| 2242 | Q7LBC6 | Lysine-specific demethylase 3B       | unknown | -11.89 | -16.27 | TRUE  | FALSE | TRUE  |
| 2243 | Q14966 | Zinc finger protein 638              | NUCLEUS | -13.97 | -22.63 | TRUE  | FALSE | TRUE  |
| 2244 | Q5SW79 | Centrosomal protein of 170 kDa       | unknown | -11.19 | -16.39 | TRUE  | FALSE | TRUE  |
| 2245 | Q92896 | Golgi apparatus protein 1            | GOLGI   | -20.89 | 30.82  | FALSE | FALSE | TRUE  |
| 2246 | Q8WXI9 | Transcriptional repressor p66-beta   | NUCLEUS | -26.01 | -27.03 | TRUE  | FALSE | TRUE  |
| 2247 | Q9H3Q1 | Cdc42 effector protein 4             | unknown | -5.76  | 10.46  | TRUE  | FALSE | TRUE  |
| 2248 | P62312 | U6 snRNA-associated Sm-like prote    | NUCLEUS | -9.78  | -30.91 | FALSE | FALSE | TRUE  |
| 2249 | Q13610 | Periodic tryptophan protein 1 homo   | NUCLEUS | -5.90  | -25.74 | FALSE | FALSE | TRUE  |
| 2250 | P05204 | Non-histone chromosomal protein h    | NUCLEUS | -26.69 | -23.25 | FALSE | FALSE | TRUE  |
| 2251 | Q8IUR0 | Trafficking protein particle complex | unknown | -11.32 | 6.22   | TRUE  | FALSE | FALSE |
| 2252 | Q9C0C9 | (E3-independent) E2 ubiquitin-conju  | unknown | 14.06  | 22.97  | FALSE | FALSE | TRUE  |
| 2253 | P38935 | DNA-binding protein SMUBP-2          | unknown | 3.68   | -18.63 | FALSE | FALSE | TRUE  |
| 2254 | Q6PJT7 | Zinc finger CCCH domain-containing   | NUCLEUS | -6.31  | -38.93 | TRUE  | FALSE | TRUE  |
| 2255 | P08962 | CD63 antigen                         | unknown | -34.82 | 17.01  | FALSE | FALSE | TRUE  |
| 2256 | O15020 | Spectrin beta chain, non-erythrocyt  | unknown | 1.59   | 26.08  | TRUE  | FALSE | TRUE  |
| 2257 | P40222 | Alpha-taxilin                        | unknown | -11.33 | -10.62 | FALSE | FALSE | TRUE  |
| 2258 | P09497 | Clathrin light chain B               | unknown | -10.10 | 13.83  | FALSE | FALSE | TRUE  |
| 2259 | Q96BZ9 | TBC1 domain family member 20         | unknown | -5.36  | 20.83  | FALSE | FALSE | TRUE  |
| 2260 | O15305 | Phosphomannomutase 2                 | unknown | 19.73  | 19.48  | FALSE | FALSE | TRUE  |
| 2261 | Q9Y4I1 | Unconventional myosin-Va             | unknown | -8.39  | -7.80  | FALSE | FALSE | TRUE  |
| 2262 | Q99755 | Phosphatidylinositol 4-phosphate 5   | unknown | -23.19 | 1.95   | TRUE  | FALSE | FALSE |
| 2263 | Q9NZM5 | Ribosome biogenesis protein NOP5     | NUCLEUS | 2.36   | -32.93 | FALSE | FALSE | TRUE  |
| 2264 | P62310 | U6 snRNA-associated Sm-like prote    | NUCLEUS | -10.02 | -30.71 | FALSE | FALSE | TRUE  |
| 2265 | P49903 | Selenide, water dikinase 1           | NUCLEUS | -9.61  | -14.59 | FALSE | FALSE | TRUE  |
| 2266 | Q14517 | Protocadherin Fat 1                  | unknown | -17.76 | 18.68  | TRUE  | FALSE | TRUE  |
| 2267 | O94760 | N(G),N(G)-dimethylarginine dimeth    | unknown | 9.43   | 16.33  | TRUE  | FALSE | TRUE  |
| 2268 | Q9H8Y8 | Golgi reassembly-stacking protein 2  | unknown | 21.58  | 19.86  | FALSE | FALSE | TRUE  |
| 2269 | Q9NZZ3 | Charged multivesicular body protein  | unknown | 8.71   | 13.99  | TRUE  | FALSE | TRUE  |
| 2270 | Q96K76 | Ubiquitin carboxyl-terminal hydrola  | unknown | 17.68  | 13.14  | TRUE  | FALSE | FALSE |
| 2271 | Q9BXF6 | Rab11 family-interacting protein 5   | unknown | -21.34 | 7.14   | TRUE  | FALSE | FALSE |
| 2272 | Q92625 | Ankyrin repeat and SAM domain-co     | unknown | -3.72  | 8.29   | TRUE  | FALSE | TRUE  |
| 2273 | Q6ZSR9 | Uncharacterized protein FLJ45252     | unknown | -6.36  | 8.40   | TRUE  | FALSE | FALSE |
| 2274 | O60333 | Kinesin-like protein KIF1B           | unknown | 3.28   | -16.17 | FALSE | FALSE | TRUE  |
| 2275 | Q86UL3 | Glycerol-3-phosphate acyltransfera   | ER      | -9.46  | 30.57  | FALSE | FALSE | TRUE  |
| 2276 | Q9P0V3 | SH3 domain-binding protein 4         | unknown | -18.95 | 14.59  | TRUE  | FALSE | FALSE |

|      |        |                                       |              |        |        |       |       |       |
|------|--------|---------------------------------------|--------------|--------|--------|-------|-------|-------|
| 2277 | Q96C01 | Protein FAM136A                       | MITOCHONDRIA | 36.73  | -1.59  | FALSE | FALSE | TRUE  |
| 2278 | P27707 | Deoxycytidine kinase                  | unknown      | 19.38  | 22.03  | FALSE | FALSE | TRUE  |
| 2279 | Q9BVC6 | Transmembrane protein 109             | unknown      | 1.37   | 31.38  | FALSE | FALSE | TRUE  |
| 2280 | Q9C0D5 | Protein TANC1                         | unknown      | 3.14   | -15.99 | TRUE  | FALSE | TRUE  |
| 2281 | Q16610 | Extracellular matrix protein 1        | unknown      | -7.89  | 28.88  | FALSE | FALSE | TRUE  |
| 2282 | Q8IW35 | Centrosomal protein of 97 kDa         | unknown      | 11.23  | 3.80   | TRUE  | FALSE | FALSE |
| 2283 | Q6ZS17 | Rho family-interacting cell polarizat | unknown      | -29.15 | -0.22  | TRUE  | FALSE | TRUE  |
| 2284 | P20594 | Atrial natriuretic peptide receptor 2 | PM           | -22.06 | 15.49  | FALSE | FALSE | TRUE  |
| 2285 | Q9H910 | Jupiter microtubule associated hom    | unknown      | 2.10   | 6.66   | TRUE  | FALSE | TRUE  |
| 2286 | O95400 | CD2 antigen cytoplasmic tail-bindin   | NUCLEUS      | -10.00 | -30.46 | TRUE  | FALSE | TRUE  |
| 2287 | Q9BZE9 | Tether containing UBX domain for G    | unknown      | 11.35  | 11.45  | FALSE | FALSE | TRUE  |
| 2288 | Q13444 | Disintegrin and metalloproteinase c   | PM           | -26.13 | 4.45   | TRUE  | FALSE | FALSE |
| 2289 | P49674 | Casein kinase I isoform epsilon       | unknown      | 7.27   | -11.07 | FALSE | FALSE | TRUE  |
| 2290 | P35520 | Cystathionine beta-synthase           | unknown      | 14.92  | 16.19  | FALSE | FALSE | TRUE  |
| 2291 | O94901 | SUN domain-containing protein 1       | unknown      | 23.63  | -12.58 | FALSE | FALSE | TRUE  |
| 2292 | Q8N3D4 | EH domain-binding protein 1-like pr   | unknown      | -16.14 | 12.59  | TRUE  | FALSE | FALSE |
| 2293 | P62942 | Peptidyl-prolyl cis-trans isomerase I | unknown      | 23.35  | 24.24  | FALSE | FALSE | TRUE  |
| 2294 | Q9NZ63 | Telomere length and silencing prote   | NUCLEUS      | -9.50  | -29.24 | TRUE  | FALSE | FALSE |
| 2295 | Q99590 | Protein SCAF11                        | NUCLEUS      | -17.31 | -24.12 | TRUE  | FALSE | TRUE  |
| 2296 | Q8IZP0 | Abl interactor 1                      | unknown      | -7.16  | 13.33  | TRUE  | FALSE | TRUE  |
| 2297 | Q9Y5L4 | Mitochondrial import inner membra     | MITOCHONDRIA | 33.79  | -14.86 | FALSE | FALSE | TRUE  |
| 2298 | Q00059 | Transcription factor A, mitochondria  | unknown      | 27.33  | -11.54 | FALSE | FALSE | TRUE  |
| 2299 | Q14197 | Peptidyl-tRNA hydrolase ICT1, mito    | MITOCHONDRIA | 42.01  | -5.51  | FALSE | FALSE | TRUE  |
| 2300 | Q8NE01 | Metal transporter CNNM3               | PM           | -21.56 | 18.53  | TRUE  | FALSE | TRUE  |
| 2301 | P31431 | Syndecan-4                            | unknown      | -38.75 | 10.98  | TRUE  | FALSE | TRUE  |
| 2302 | Q96QE3 | ATPase family AAA domain-contain      | unknown      | -15.86 | -13.44 | TRUE  | FALSE | TRUE  |
| 2303 | P41236 | Protein phosphatase inhibitor 2       | CYTOSOL      | 15.48  | 23.07  | TRUE  | FALSE | TRUE  |
| 2304 | O95208 | Epsin-2                               | unknown      | -10.87 | 24.73  | TRUE  | FALSE | FALSE |
| 2305 | O43768 | Alpha-endosulfine                     | unknown      | 10.14  | 20.58  | TRUE  | FALSE | TRUE  |
| 2306 | Q8N3X1 | Formin-binding protein 4              | NUCLEUS      | -6.98  | -30.46 | TRUE  | FALSE | TRUE  |
| 2307 | Q15648 | Mediator of RNA polymerase II tran    | NUCLEUS      | -1.70  | -30.70 | TRUE  | FALSE | TRUE  |
| 2308 | O14976 | Cyclin-G-associated kinase            | unknown      | -3.38  | 9.50   | FALSE | FALSE | TRUE  |
| 2309 | Q9Y371 | Endophilin-B1                         | unknown      | -18.30 | 2.54   | FALSE | FALSE | TRUE  |
| 2310 | Q13363 | C-terminal-binding protein 1          | unknown      | 12.34  | 6.74   | FALSE | FALSE | TRUE  |
| 2311 | Q15014 | Mortality factor 4-like protein 2     | unknown      | -14.19 | -20.12 | FALSE | FALSE | TRUE  |
| 2312 | Q9H792 | Pseudopodium-enriched atypical ki     | unknown      | -4.10  | 1.05   | TRUE  | FALSE | FALSE |
| 2313 | Q8NDA8 | Maestro heat-like repeat-containin    | unknown      | -6.10  | 7.18   | FALSE | FALSE | TRUE  |
| 2314 | Q14108 | Lysosome membrane protein 2           | LYSOSOME     | -40.55 | 9.97   | FALSE | FALSE | TRUE  |

|      |        |                                               |              |        |        |       |       |       |
|------|--------|-----------------------------------------------|--------------|--------|--------|-------|-------|-------|
| 2315 | Q9Y237 | Peptidyl-prolyl cis-trans isomerase I         | unknown      | -6.36  | -18.98 | FALSE | FALSE | TRUE  |
| 2316 | Q00653 | Nuclear factor NF-kappa-B p100 subunit        | unknown      | 1.34   | -2.33  | FALSE | FALSE | TRUE  |
| 2317 | P0C7U0 | Protein ELFN1                                 | PM           | -24.96 | 7.27   | TRUE  | FALSE | FALSE |
| 2318 | P48634 | Protein PRRC2A                                | unknown      | 6.05   | -18.69 | TRUE  | FALSE | TRUE  |
| 2319 | Q96I25 | Splicing factor 45                            | NUCLEUS      | 4.76   | -34.00 | TRUE  | FALSE | TRUE  |
| 2320 | Q8NBF2 | NHL repeat-containing protein 2               | unknown      | 19.15  | 21.62  | FALSE | FALSE | TRUE  |
| 2321 | Q9NVS2 | 39S ribosomal protein S18a, mitochondrial     | MITOCHONDRIA | 43.29  | -5.35  | FALSE | FALSE | TRUE  |
| 2322 | O60658 | High affinity cAMP-specific and IBM           | unknown      | -27.29 | 2.17   | TRUE  | FALSE | FALSE |
| 2323 | P62070 | Ras-related protein R-Ras2                    | PM           | -25.89 | 15.72  | FALSE | FALSE | TRUE  |
| 2324 | Q8N183 | NADH dehydrogenase [ubiquinone]               | MITOCHONDRIA | 42.63  | -9.75  | TRUE  | FALSE | TRUE  |
| 2325 | Q13573 | SNW domain-containing protein 1               | NUCLEUS      | -2.43  | -38.19 | TRUE  | FALSE | TRUE  |
| 2326 | Q14554 | Protein disulfide-isomerase A5                | ER           | 4.84   | 37.70  | FALSE | FALSE | TRUE  |
| 2327 | P19447 | General transcription and DNA repair          | unknown      | -9.42  | -22.88 | FALSE | FALSE | TRUE  |
| 2328 | Q8TAE8 | Growth arrest and DNA damage-inducible        | unknown      | 41.51  | -1.42  | FALSE | FALSE | TRUE  |
| 2329 | Q6NYC8 | Phostensin                                    | unknown      | -5.24  | 10.91  | TRUE  | FALSE | FALSE |
| 2330 | Q8IWC1 | MAP7 domain-containing protein 3              | unknown      | -5.82  | -8.98  | TRUE  | FALSE | TRUE  |
| 2331 | P09884 | DNA polymerase alpha catalytic subunit        | unknown      | 16.26  | 3.21   | FALSE | FALSE | TRUE  |
| 2332 | O94913 | Pre-mRNA cleavage complex 2 protein           | NUCLEUS      | -13.85 | -22.86 | TRUE  | FALSE | TRUE  |
| 2333 | Q9BW19 | Kinesin-like protein KIFC1                    | unknown      | -15.98 | -12.32 | FALSE | FALSE | TRUE  |
| 2334 | Q9NUQ6 | SPATS2-like protein                           | unknown      | 9.90   | -19.06 | FALSE | FALSE | TRUE  |
| 2335 | Q15652 | Probable JmjC domain-containing histone       | unknown      | -14.77 | -19.24 | TRUE  | FALSE | FALSE |
| 2336 | Q8N3V7 | Synaptopodin                                  | unknown      | -6.98  | -4.47  | TRUE  | FALSE | TRUE  |
| 2337 | P18859 | ATP synthase-coupling factor 6, mitochondrial | MITOCHONDRIA | 39.26  | -11.93 | FALSE | FALSE | TRUE  |
| 2338 | Q9Y276 | Mitochondrial chaperone BCS1                  | MITOCHONDRIA | 41.27  | -13.54 | FALSE | FALSE | TRUE  |
| 2339 | Q04656 | Copper-transporting ATPase 1                  | unknown      | -35.29 | 14.84  | TRUE  | FALSE | FALSE |
| 2340 | Q9UKS6 | Protein kinase C and casein kinase 2          | PM           | -24.42 | 8.11   | TRUE  | FALSE | TRUE  |
| 2341 | Q9UHR4 | Brain-specific angiogenesis inhibitor 1       | PM           | -24.74 | 14.65  | TRUE  | FALSE | TRUE  |
| 2342 | Q9NRA8 | Eukaryotic translation initiation factor 4E   | unknown      | 1.66   | -18.87 | TRUE  | FALSE | TRUE  |
| 2343 | Q8IYS1 | Peptidase M20 domain-containing protein       | unknown      | 16.35  | 18.37  | FALSE | FALSE | TRUE  |
| 2344 | P04062 | Glucosylceramidase                            | LYSOSOME     | -40.62 | 8.83   | FALSE | FALSE | TRUE  |
| 2345 | Q5VT25 | Serine/threonine-protein kinase M1            | unknown      | -7.79  | 7.68   | TRUE  | FALSE | FALSE |
| 2346 | Q8N9T8 | Protein KRI1 homolog                          | NUCLEUS      | -8.54  | -33.18 | TRUE  | FALSE | TRUE  |
| 2347 | Q9NUM4 | Transmembrane protein 106B                    | unknown      | -40.35 | 8.96   | FALSE | FALSE | TRUE  |
| 2348 | Q9Y6E0 | Serine/threonine-protein kinase 24            | unknown      | 1.35   | 10.79  | FALSE | FALSE | TRUE  |
| 2349 | Q14254 | Flotillin-2                                   | unknown      | -39.75 | 9.72   | TRUE  | FALSE | TRUE  |
| 2350 | Q9ULT8 | E3 ubiquitin-protein ligase HECTD1            | unknown      | 13.59  | 9.31   | FALSE | FALSE | TRUE  |
| 2351 | Q8IXB1 | DnaJ homolog subfamily C member 1             | ER           | 2.55   | 37.03  | FALSE | FALSE | TRUE  |
| 2352 | Q6ZU35 | Uncharacterized protein KIAA1211              | unknown      | -4.14  | 9.88   | TRUE  | FALSE | FALSE |

|      |        |                                       |         |        |        |       |       |       |
|------|--------|---------------------------------------|---------|--------|--------|-------|-------|-------|
| 2353 | Q96RT7 | Gamma-tubulin complex component       | unknown | 6.95   | -24.88 | FALSE | FALSE | TRUE  |
| 2354 | O95372 | Acyl-protein thioesterase 2           | unknown | 10.50  | 11.57  | TRUE  | FALSE | FALSE |
| 2355 | Q9H6R0 | Putative ATP-dependent RNA helicase   | NUCLEUS | -0.86  | -38.61 | FALSE | TRUE  | TRUE  |
| 2356 | Q8WUA2 | Peptidyl-prolyl cis-trans isomerase-  | NUCLEUS | -0.63  | -24.87 | FALSE | FALSE | TRUE  |
| 2357 | P46379 | Large proline-rich protein BAG6       | unknown | 10.88  | 2.93   | FALSE | FALSE | TRUE  |
| 2358 | Q99417 | c-Myc-binding protein                 | NUCLEUS | 8.37   | -4.82  | FALSE | FALSE | TRUE  |
| 2359 | Q9BQ61 | Telomerase RNA component intera       | NUCLEUS | -1.29  | -32.99 | TRUE  | FALSE | TRUE  |
| 2360 | Q13464 | Rho-associated protein kinase 1       | unknown | -8.35  | 10.94  | FALSE | FALSE | TRUE  |
| 2361 | Q9NZJ0 | Denticleless protein homolog          | unknown | -0.68  | -2.38  | FALSE | FALSE | TRUE  |
| 2362 | Q9UNY4 | Transcription termination factor 2    | unknown | -11.26 | -16.98 | TRUE  | FALSE | TRUE  |
| 2363 | Q13643 | Four and a half LIM domains protei    | unknown | 3.27   | -2.30  | FALSE | FALSE | TRUE  |
| 2364 | Q9UPQ0 | LIM and calponin homology domain      | unknown | 5.51   | 2.28   | TRUE  | FALSE | TRUE  |
| 2365 | Q15061 | WD repeat-containing protein 43       | NUCLEUS | -2.40  | -41.21 | FALSE | FALSE | TRUE  |
| 2366 | Q8WUQ7 | Cactin                                | NUCLEUS | -2.55  | -36.00 | FALSE | FALSE | TRUE  |
| 2367 | O60271 | C-Jun-amino-terminal kinase-intera    | CYTOSOL | 16.30  | 17.07  | FALSE | FALSE | TRUE  |
| 2368 | P18615 | Negative elongation factor E          | NUCLEUS | 10.08  | -5.66  | TRUE  | FALSE | TRUE  |
| 2369 | Q9H330 | Transmembrane protein 245             | unknown | -11.45 | 34.22  | FALSE | FALSE | TRUE  |
| 2370 | Q9BY77 | Polymerase delta-interacting protei   | NUCLEUS | -1.45  | -39.96 | TRUE  | FALSE | TRUE  |
| 2371 | Q7Z333 | Probable helicase senataxin           | unknown | -14.83 | -17.23 | TRUE  | FALSE | TRUE  |
| 2372 | P35269 | General transcription factor IIF subu | NUCLEUS | -9.16  | -15.39 | FALSE | FALSE | TRUE  |
| 2373 | Q14457 | Beclin-1                              | unknown | -11.66 | 3.24   | TRUE  | FALSE | FALSE |
| 2374 | Q8TEP8 | Centrosomal protein of 192 kDa        | NUCLEUS | -2.55  | -4.33  | TRUE  | FALSE | FALSE |
| 2375 | P49750 | YLP motif-containing protein 1        | NUCLEUS | 1.79   | -34.11 | TRUE  | FALSE | TRUE  |
| 2376 | Q8IUD2 | ELKS/Rab6-interacting/CAST family     | NUCLEUS | -3.54  | -10.33 | TRUE  | FALSE | FALSE |
| 2377 | P49247 | Ribose-5-phosphate isomerase          | unknown | 4.84   | 1.43   | FALSE | FALSE | TRUE  |
| 2378 | O60282 | Kinesin heavy chain isoform 5C        | unknown | 0.76   | -4.52  | FALSE | FALSE | TRUE  |
| 2379 | Q9H425 | Uncharacterized protein C1orf198      | unknown | -5.06  | 11.93  | TRUE  | FALSE | FALSE |
| 2380 | Q3LXA3 | Triokinase/FMN cyclase                | unknown | 17.64  | 17.31  | FALSE | FALSE | TRUE  |
| 2381 | Q9NVX2 | Notchless protein homolog 1           | NUCLEUS | 0.39   | -24.25 | FALSE | FALSE | TRUE  |
| 2382 | Q8IWX8 | Calcium homeostasis endoplasmic r     | NUCLEUS | 4.77   | -33.73 | TRUE  | FALSE | TRUE  |
| 2383 | Q96JH7 | Deubiquitinating protein VCIP135      | unknown | -0.04  | -3.63  | TRUE  | FALSE | TRUE  |
| 2384 | Q8IVM0 | Coiled-coil domain-containing prote   | unknown | -4.15  | 11.98  | TRUE  | FALSE | TRUE  |
| 2385 | Q9NYZ3 | G2 and S phase-expressed protein 1    | unknown | -7.17  | -11.67 | TRUE  | FALSE | FALSE |
| 2386 | P85037 | Forkhead box protein K1               | NUCLEUS | -9.27  | -13.95 | TRUE  | FALSE | FALSE |
| 2387 | Q9H0X4 | Protein FAM234A                       | PM      | -21.30 | 15.74  | TRUE  | FALSE | TRUE  |
| 2388 | Q12923 | Tyrosine-protein phosphatase non-     | unknown | -7.19  | 10.73  | TRUE  | FALSE | TRUE  |
| 2389 | O15397 | Importin-8                            | unknown | 16.30  | 7.16   | FALSE | FALSE | TRUE  |
| 2390 | P49848 | Transcription initiation factor TFIID | unknown | -15.35 | -21.72 | TRUE  | FALSE | FALSE |

|      |        |                                           |              |        |        |       |       |       |
|------|--------|-------------------------------------------|--------------|--------|--------|-------|-------|-------|
| 2391 | P49959 | Double-strand break repair protein        | unknown      | -16.34 | -17.43 | TRUE  | FALSE | TRUE  |
| 2392 | P19387 | DNA-directed RNA polymerase II su         | NUCLEUS      | -15.37 | -29.07 | FALSE | FALSE | TRUE  |
| 2393 | Q15075 | Early endosome antigen 1                  | unknown      | 7.74   | 0.04   | FALSE | FALSE | TRUE  |
| 2394 | P10619 | Lysosomal protective protein              | LYSOSOME     | -35.83 | 3.86   | FALSE | FALSE | TRUE  |
| 2395 | Q9NQZ2 | Something about silencing protein 1       | NUCLEUS      | -1.01  | -40.29 | FALSE | FALSE | TRUE  |
| 2396 | P08579 | U2 small nuclear ribonucleoprotein        | NUCLEUS      | -5.98  | -33.71 | TRUE  | FALSE | FALSE |
| 2397 | Q9NUQ3 | Gamma-taxilin                             | unknown      | -7.79  | -9.27  | TRUE  | FALSE | TRUE  |
| 2398 | P30260 | Cell division cycle protein 27 homolog    | unknown      | -17.11 | -19.25 | FALSE | FALSE | TRUE  |
| 2399 | A8MVW0 | Protein FAM171A2                          | unknown      | -30.11 | -0.63  | TRUE  | FALSE | FALSE |
| 2400 | O60830 | Mitochondrial import inner membrane       | MITOCHONDRIA | 41.47  | -13.26 | FALSE | FALSE | TRUE  |
| 2401 | P61916 | NPC intracellular cholesterol transporter | unknown      | -40.82 | 10.58  | FALSE | FALSE | TRUE  |
| 2402 | P62875 | DNA-directed RNA polymerases I, II        | NUCLEUS      | -16.57 | -28.96 | FALSE | FALSE | TRUE  |
| 2403 | Q9BVI4 | Nucleolar complex protein 4 homolog       | NUCLEUS      | -2.49  | -40.59 | FALSE | FALSE | TRUE  |
| 2404 | Q13451 | Peptidyl-prolyl cis-trans isomerase I     | unknown      | 21.01  | 16.34  | FALSE | FALSE | TRUE  |
| 2405 | Q9H4G0 | Band 4.1-like protein 1                   | PM           | -27.38 | 1.07   | TRUE  | FALSE | TRUE  |
| 2406 | Q9UGP4 | LIM domain-containing protein 1           | unknown      | -3.57  | 11.61  | TRUE  | FALSE | TRUE  |
| 2407 | Q6RW13 | Type-1 angiotensin II receptor-associated | unknown      | -36.11 | 10.30  | FALSE | FALSE | TRUE  |
| 2408 | Q96AQ6 | Pre-B-cell leukemia transcription factor  | unknown      | -10.33 | 30.53  | TRUE  | FALSE | FALSE |
| 2409 | O95817 | BAG family molecular chaperone re         | unknown      | -2.35  | -6.67  | TRUE  | FALSE | TRUE  |
| 2410 | O14964 | Hepatocyte growth factor-regulated        | PM           | -23.11 | 13.92  | TRUE  | FALSE | FALSE |
| 2411 | Q9BQ75 | Protein CMSS1                             | NUCLEUS      | 3.61   | -27.10 | TRUE  | FALSE | TRUE  |
| 2412 | Q9NPQ8 | Synembryn-A                               | unknown      | 10.43  | 12.17  | TRUE  | FALSE | FALSE |
| 2413 | Q9NRZ9 | Lymphoid-specific helicase                | unknown      | -14.75 | -20.69 | FALSE | FALSE | TRUE  |
| 2414 | P49023 | Paxillin                                  | unknown      | 7.76   | 18.15  | TRUE  | FALSE | TRUE  |
| 2415 | P53794 | Sodium/myo-inositol cotransporter         | PM           | -21.22 | 16.64  | TRUE  | FALSE | FALSE |
| 2416 | O14562 | Ubiquitin domain-containing protein       | unknown      | 15.75  | 4.48   | FALSE | FALSE | TRUE  |
| 2417 | Q92925 | SWI/SNF-related matrix-associated         | NUCLEUS      | -25.53 | -23.92 | FALSE | FALSE | TRUE  |
| 2418 | Q9UID3 | Vacuolar protein sorting-associated       | unknown      | -8.37  | -7.86  | TRUE  | FALSE | TRUE  |
| 2419 | P52298 | Nuclear cap-binding protein subunit       | NUCLEUS      | -12.50 | -29.67 | FALSE | FALSE | TRUE  |
| 2420 | P01137 | Transforming growth factor beta-1         | ER           | -3.95  | 34.99  | FALSE | FALSE | TRUE  |
| 2421 | Q52LW3 | Rho GTPase-activating protein 29          | unknown      | -2.59  | 0.48   | TRUE  | FALSE | FALSE |
| 2422 | O94804 | Serine/threonine-protein kinase 10        | unknown      | -13.47 | 13.24  | TRUE  | FALSE | TRUE  |
| 2423 | Q9NS86 | LanC-like protein 2                       | unknown      | 9.04   | -3.87  | FALSE | FALSE | TRUE  |
| 2424 | Q9UPT8 | Zinc finger CCCH domain-containing        | NUCLEUS      | -18.37 | -32.81 | TRUE  | FALSE | TRUE  |
| 2425 | P48681 | Nestin                                    | NUCLEUS      | -19.98 | -32.30 | TRUE  | FALSE | TRUE  |
| 2426 | Q8ND04 | Protein SMG8                              | unknown      | 5.58   | -20.98 | FALSE | FALSE | TRUE  |
| 2427 | Q12996 | Cleavage stimulation factor subunit       | NUCLEUS      | -10.43 | -35.14 | FALSE | FALSE | TRUE  |
| 2428 | Q96B97 | SH3 domain-containing kinase-binc         | NUCLEUS      | -10.46 | -13.81 | FALSE | FALSE | TRUE  |



|      |        |                                                         |                   |        |        |       |       |       |
|------|--------|---------------------------------------------------------|-------------------|--------|--------|-------|-------|-------|
| 2429 | P01033 | Metalloproteinase inhibitor 1                           | PM                | -28.33 | 13.94  | FALSE | FALSE | TRUE  |
| 2430 | Q9GZZ9 | Ubiquitin-like modifier-activating enzyme               | unknown           | 10.90  | 18.35  | FALSE | FALSE | TRUE  |
| 2431 | O75348 | V-type proton ATPase subunit G 1                        | unknown           | -17.83 | 3.98   | FALSE | FALSE | TRUE  |
| 2432 | Q13459 | Unconventional myosin-IXb                               | unknown           | -2.93  | -1.36  | TRUE  | FALSE | TRUE  |
| 2433 | Q96SY0 | Integrator complex subunit 14                           | unknown           | -17.22 | -21.98 | FALSE | FALSE | TRUE  |
| 2434 | Q8N3U4 | Cohesin subunit SA-2                                    | NUCLEUS-CHROMATIN | -18.20 | -16.06 | TRUE  | FALSE | FALSE |
| 2435 | Q96IJ6 | Mannose-1-phosphate guanyltansferase                    | unknown           | 15.51  | 9.15   | FALSE | FALSE | TRUE  |
| 2436 | Q14165 | Malectin                                                | unknown           | 5.36   | 36.80  | FALSE | FALSE | TRUE  |
| 2437 | Q9H4I3 | TraB domain-containing protein                          | MITOCHONDRIA      | 37.88  | -7.54  | FALSE | FALSE | TRUE  |
| 2438 | Q13505 | Metaxin-1                                               | MITOCHONDRIA      | 38.89  | -0.19  | FALSE | FALSE | TRUE  |
| 2439 | O15511 | Actin-related protein 2/3 complex subunit 1             | unknown           | 1.72   | -14.98 | FALSE | FALSE | TRUE  |
| 2440 | Q93052 | Lipoma-preferred partner                                | unknown           | -2.76  | 0.24   | TRUE  | FALSE | TRUE  |
| 2441 | P55081 | Microfibrillar-associated protein 1                     | NUCLEUS           | 0.64   | -40.66 | TRUE  | FALSE | TRUE  |
| 2442 | Q96IZ0 | PRKC apoptosis WT1 regulator protein                    | unknown           | -2.54  | -0.31  | FALSE | FALSE | TRUE  |
| 2443 | Q9H814 | Phosphorylated adapter RNA export factor 1              | unknown           | 23.19  | 15.25  | FALSE | FALSE | TRUE  |
| 2444 | Q9UKJ3 | G patch domain-containing protein                       | NUCLEUS           | -6.60  | -30.09 | TRUE  | FALSE | TRUE  |
| 2445 | P29992 | Guanine nucleotide-binding protein gamma-1              | PM                | -27.33 | 10.22  | FALSE | FALSE | TRUE  |
| 2446 | Q5VT52 | Regulation of nuclear pre-mRNA dephosphorylation        | NUCLEUS           | -18.65 | -26.28 | TRUE  | FALSE | TRUE  |
| 2447 | Q8NFB4 | Nucleoporin Nup37                                       | NUCLEUS           | -19.75 | -29.81 | FALSE | FALSE | TRUE  |
| 2448 | Q9BY89 | Uncharacterized protein KIAA1671                        | unknown           | -3.88  | 2.60   | TRUE  | FALSE | TRUE  |
| 2449 | Q92600 | CCR4-NOT transcription complex subunit 1                | unknown           | 8.63   | -25.42 | FALSE | FALSE | TRUE  |
| 2450 | Q15678 | Tyrosine-protein phosphatase non-receptor type 11       | unknown           | -7.12  | -0.06  | FALSE | FALSE | TRUE  |
| 2451 | Q86UU1 | Pleckstrin homology-like domain family class A member 1 | unknown           | 0.36   | -9.21  | TRUE  | FALSE | FALSE |
| 2452 | Q9UPN4 | Centrosomal protein of 131 kDa                          | NUCLEUS           | -1.36  | -26.83 | TRUE  | FALSE | TRUE  |
| 2453 | Q8NG31 | Kinetochore scaffold 1                                  | unknown           | -12.39 | -17.63 | TRUE  | FALSE | TRUE  |
| 2454 | Q14BN4 | Sarcolemmal membrane-associated protein                 | unknown           | -12.76 | 29.09  | FALSE | FALSE | TRUE  |
| 2455 | O43823 | A-kinase anchor protein 8                               | NUCLEUS           | -14.75 | -30.53 | FALSE | FALSE | TRUE  |
| 2456 | Q9Y672 | Dolichyl pyrophosphate Man9GlcNAc 6-phosphotransferase  | unknown           | 6.48   | 37.18  | FALSE | FALSE | TRUE  |
| 2457 | O60716 | Catenin delta-1                                         | PM                | -26.29 | 2.14   | TRUE  | FALSE | TRUE  |
| 2458 | P41743 | Protein kinase C iota type                              | unknown           | -8.37  | 14.31  | FALSE | FALSE | TRUE  |
| 2459 | Q13445 | Transmembrane emp24 domain-containing protein 1         | unknown           | -10.43 | 32.54  | FALSE | FALSE | TRUE  |
| 2460 | P10644 | cAMP-dependent protein kinase type II                   | unknown           | 7.45   | 13.85  | FALSE | FALSE | TRUE  |
| 2461 | P41240 | Tyrosine-protein kinase CSK                             | unknown           | 0.00   | -4.35  | FALSE | FALSE | TRUE  |
| 2462 | Q8NFI5 | Retinoic acid-induced protein 3                         | PM                | -20.53 | 15.11  | TRUE  | FALSE | TRUE  |
| 2463 | Q9UKZ1 | CCR4-NOT transcription complex subunit 1                | RIBOSOME 40S      | 9.09   | -24.63 | TRUE  | FALSE | TRUE  |
| 2464 | Q8IWE4 | DCN1-like protein 3                                     | PM                | -26.83 | 11.53  | TRUE  | FALSE | FALSE |
| 2465 | Q9NSV4 | Protein diaphanous homolog 3                            | unknown           | -4.19  | -4.94  | TRUE  | FALSE | TRUE  |
| 2466 | O95197 | Reticulon-3                                             | unknown           | -6.80  | 21.76  | FALSE | FALSE | TRUE  |

|      |        |                                       |                   |        |        |       |       |       |
|------|--------|---------------------------------------|-------------------|--------|--------|-------|-------|-------|
| 2467 | Q5JTD0 | Tight junction-associated protein 1   | unknown           | -0.22  | -2.76  | TRUE  | FALSE | FALSE |
| 2468 | Q9ULH1 | Arf-GAP with SH3 domain, ANK rep      | unknown           | -4.80  | 2.53   | TRUE  | FALSE | FALSE |
| 2469 | Q96LD4 | Tripartite motif-containing protein 4 | unknown           | 2.21   | -1.99  | FALSE | TRUE  | TRUE  |
| 2470 | Q8N4C8 | Misshapen-like kinase 1               | unknown           | -5.99  | 13.02  | TRUE  | FALSE | TRUE  |
| 2471 | Q9Y2H6 | Fibronectin type-III domain-contain   | ER                | 2.69   | 36.43  | FALSE | FALSE | TRUE  |
| 2472 | O43493 | Trans-Golgi network integral memb     | unknown           | -35.85 | 15.29  | FALSE | FALSE | TRUE  |
| 2473 | P30042 | ES1 protein homolog, mitochondria     | MITOCHONDRIA      | 42.05  | -11.54 | FALSE | FALSE | TRUE  |
| 2474 | Q8WXE0 | Caskin-2                              | unknown           | -5.68  | 12.85  | TRUE  | FALSE | FALSE |
| 2475 | Q9H0E9 | Bromodomain-containing protein 8      | NUCLEUS-CHROMATIN | -19.44 | -16.51 | TRUE  | FALSE | FALSE |
| 2476 | P19784 | Casein kinase II subunit alpha'       | unknown           | 12.27  | 3.75   | FALSE | FALSE | TRUE  |
| 2477 | Q9BQE5 | Apolipoprotein L2                     | unknown           | -3.66  | 5.84   | FALSE | FALSE | TRUE  |
| 2478 | P40855 | Peroxisomal biogenesis factor 19      | unknown           | 10.63  | 8.37   | FALSE | FALSE | TRUE  |
| 2479 | Q96S66 | Chloride channel CLIC-like protein 1  | unknown           | -7.51  | 33.47  | TRUE  | FALSE | TRUE  |
| 2480 | O43772 | Mitochondrial carnitine/acylcarnitir  | unknown           | 43.77  | -13.80 | FALSE | FALSE | TRUE  |
| 2481 | P82094 | TATA element modulatory factor        | unknown           | -20.80 | 32.55  | TRUE  | FALSE | FALSE |
| 2482 | Q9UJ70 | N-acetyl-D-glucosamine kinase         | unknown           | 24.55  | 21.21  | FALSE | FALSE | TRUE  |
| 2483 | P25490 | Transcriptional repressor protein YY  | NUCLEUS           | -25.43 | -26.18 | FALSE | FALSE | TRUE  |
| 2484 | Q92538 | Golgi-specific brefeldin A-resistance | unknown           | -16.72 | 7.02   | FALSE | FALSE | TRUE  |
| 2485 | Q9UEE9 | Craniofacial development protein 1    | unknown           | 22.60  | 14.67  | TRUE  | FALSE | TRUE  |
| 2486 | O60508 | Pre-mRNA-processing factor 17         | NUCLEUS           | -2.56  | -37.75 | FALSE | FALSE | TRUE  |
| 2487 | P62745 | Rho-related GTP-binding protein Rh    | unknown           | -28.40 | 10.59  | FALSE | FALSE | TRUE  |
| 2488 | P30622 | CAP-Gly domain-containing linker p    | unknown           | 2.26   | -1.68  | FALSE | FALSE | TRUE  |
| 2489 | Q8NBJ7 | Sulfatase-modifying factor 2          | ER                | -5.04  | 26.72  | FALSE | FALSE | TRUE  |
| 2490 | O43164 | E3 ubiquitin-protein ligase Praja-2   | unknown           | 14.22  | 3.15   | TRUE  | FALSE | FALSE |
| 2491 | Q9HB58 | Sp110 nuclear body protein            | NUCLEUS-CHROMATIN | -20.19 | -13.27 | FALSE | FALSE | TRUE  |
| 2492 | Q9BY43 | Charged multivesicular body protei    | unknown           | 10.50  | 14.85  | FALSE | FALSE | TRUE  |
| 2493 | Q9Y4D1 | Disheveled-associated activator of    | unknown           | -24.12 | 5.71   | TRUE  | FALSE | FALSE |
| 2494 | Q96FK6 | WD repeat-containing protein 89       | NUCLEUS           | -2.88  | -30.37 | FALSE | FALSE | TRUE  |
| 2495 | O60870 | DNA/RNA-binding protein KIN17         | NUCLEUS           | 3.06   | -32.46 | FALSE | FALSE | TRUE  |
| 2496 | Q13439 | Golgin subfamily A member 4           | unknown           | -1.02  | -0.30  | TRUE  | FALSE | FALSE |
| 2497 | P48556 | 26S proteasome non-ATPase regul       | PROTEASOME        | 21.49  | 6.64   | FALSE | FALSE | TRUE  |
| 2498 | Q8NDI1 | EH domain-binding protein 1           | unknown           | 2.82   | 9.20   | TRUE  | FALSE | TRUE  |
| 2499 | Q5JRX3 | Presequence protease, mitochondri     | MITOCHONDRIA      | 39.56  | -7.88  | FALSE | FALSE | TRUE  |
| 2500 | O15126 | Secretory carrier-associated memb     | unknown           | -34.52 | 11.35  | TRUE  | FALSE | TRUE  |
| 2501 | P12955 | Xaa-Pro dipeptidase                   | unknown           | 23.24  | 20.62  | TRUE  | FALSE | FALSE |
| 2502 | Q9NXV6 | CDKN2A-interacting protein            | NUCLEUS           | -4.02  | -30.62 | TRUE  | FALSE | TRUE  |
| 2503 | Q9H6T3 | RNA polymerase II-associated prot     | unknown           | 8.52   | -14.12 | TRUE  | FALSE | TRUE  |
| 2504 | P82970 | High mobility group nucleosome-bi     | NUCLEUS           | -19.83 | -21.83 | FALSE | FALSE | TRUE  |

|      |        |                                       |              |        |        |       |       |       |
|------|--------|---------------------------------------|--------------|--------|--------|-------|-------|-------|
| 2505 | P28290 | Sperm-specific antigen 2              | unknown      | -2.64  | 2.18   | TRUE  | FALSE | TRUE  |
| 2506 | Q9H4L7 | SWI/SNF-related matrix-associated     | unknown      | 16.29  | 3.08   | FALSE | FALSE | TRUE  |
| 2507 | Q9UH65 | Switch-associated protein 70          | unknown      | 6.44   | 0.41   | TRUE  | FALSE | TRUE  |
| 2508 | P42345 | Serine/threonine-protein kinase m1    | unknown      | -10.34 | 3.35   | FALSE | FALSE | TRUE  |
| 2509 | Q8NFC6 | Biorientation of chromosomes in ce    | NUCLEUS      | -22.13 | -25.08 | TRUE  | FALSE | TRUE  |
| 2510 | P11047 | Laminin subunit gamma-1               | ER           | -0.71  | 37.32  | FALSE | FALSE | TRUE  |
| 2511 | Q969G3 | SWI/SNF-related matrix-associated     | NUCLEUS      | -25.78 | -24.15 | TRUE  | FALSE | TRUE  |
| 2512 | Q8IWA4 | Mitofusin-1                           | unknown      | 34.29  | -3.50  | FALSE | FALSE | TRUE  |
| 2513 | Q6PGP7 | Tetratricopeptide repeat protein 37   | unknown      | 8.13   | -21.13 | FALSE | FALSE | TRUE  |
| 2514 | Q86UU0 | B-cell CLL/lymphoma 9-like protein    | unknown      | 0.39   | -8.74  | TRUE  | FALSE | FALSE |
| 2515 | Q9UN37 | Vacuolar protein sorting-associated   | unknown      | -17.66 | 6.42   | FALSE | FALSE | TRUE  |
| 2516 | A8CG34 | Nuclear envelope pore membrane p      | unknown      | 23.65  | -12.16 | TRUE  | FALSE | TRUE  |
| 2517 | Q9P273 | Teneurin-3                            | PM           | -26.01 | 8.05   | TRUE  | FALSE | FALSE |
| 2518 | Q6XZF7 | Dynamin-binding protein               | unknown      | -0.78  | -1.96  | TRUE  | FALSE | TRUE  |
| 2519 | P46736 | Lys-63-specific deubiquitinase BRCC   | NUCLEUS      | 12.94  | 1.43   | FALSE | FALSE | TRUE  |
| 2520 | Q13136 | Liprin-alpha-1                        | unknown      | -4.03  | 2.48   | TRUE  | FALSE | TRUE  |
| 2521 | Q9H3P7 | Golgi resident protein GCP60          | unknown      | 19.32  | 15.81  | FALSE | FALSE | TRUE  |
| 2522 | A6NJ78 | Probable methyltransferase-like pr    | MITOCHONDRIA | 33.51  | -8.68  | FALSE | FALSE | TRUE  |
| 2523 | Q9BWU0 | Kanadaplin                            | unknown      | -12.05 | -31.41 | TRUE  | FALSE | TRUE  |
| 2524 | P16930 | Fumarylacetoacetase                   | CYTOSOL      | 19.02  | 24.44  | TRUE  | FALSE | TRUE  |
| 2525 | P40692 | DNA mismatch repair protein Mlh1      | unknown      | -12.67 | -15.39 | FALSE | FALSE | TRUE  |
| 2526 | Q9H5Z1 | Probable ATP-dependent RNA helic      | NUCLEUS      | -1.08  | -24.27 | FALSE | FALSE | TRUE  |
| 2527 | Q96QC0 | Serine/threonine-protein phosphat     | NUCLEUS      | -12.27 | -35.49 | TRUE  | FALSE | TRUE  |
| 2528 | O43159 | Ribosomal RNA-processing protein 1    | NUCLEUS      | -0.95  | -38.78 | FALSE | FALSE | TRUE  |
| 2529 | Q15435 | Protein phosphatase 1 regulatory su   | unknown      | 19.48  | 20.60  | FALSE | FALSE | TRUE  |
| 2530 | Q7Z2W9 | 39S ribosomal protein L21, mitoch     | unknown      | 44.62  | -12.19 | FALSE | FALSE | TRUE  |
| 2531 | Q8NBL1 | Protein O-glucosyltransferase 1       | ER           | 2.33   | 36.51  | FALSE | FALSE | TRUE  |
| 2532 | Q9NXR1 | Nuclear distribution protein nudE ho  | unknown      | -1.86  | -12.50 | FALSE | FALSE | TRUE  |
| 2533 | P29083 | General transcription factor IIE subu | NUCLEUS      | -7.94  | -15.57 | FALSE | FALSE | TRUE  |
| 2534 | Q5JRA6 | Transport and Golgi organization pr   | ER           | 0.70   | 39.32  | TRUE  | FALSE | FALSE |
| 2535 | Q9Y3B7 | 39S ribosomal protein L11, mitoch     | MITOCHONDRIA | 42.88  | -4.68  | FALSE | FALSE | TRUE  |
| 2536 | P35611 | Alpha-adducin                         | NUCLEUS      | -10.87 | -17.73 | TRUE  | FALSE | TRUE  |
| 2537 | Q8NEB9 | Phosphatidylinositol 3-kinase cataly  | unknown      | 4.53   | -12.23 | TRUE  | FALSE | TRUE  |
| 2538 | Q9Y6A5 | Transforming acidic coiled-coil-cont  | unknown      | 12.38  | 8.94   | FALSE | FALSE | TRUE  |
| 2539 | Q9Y679 | Ancient ubiquitous protein 1          | unknown      | -4.41  | 31.20  | FALSE | FALSE | TRUE  |
| 2540 | Q5JTJ3 | Cytochrome c oxidase assembly fac     | unknown      | 34.93  | 0.87   | FALSE | TRUE  | TRUE  |
| 2541 | Q9NWU1 | 3-oxoacyl-[acyl-carrier-protein] syn  | MITOCHONDRIA | 41.89  | -8.71  | FALSE | FALSE | TRUE  |
| 2542 | Q6NUQ4 | Transmembrane protein 214             | unknown      | 5.62   | 38.04  | FALSE | FALSE | TRUE  |

|      |        |                                       |                   |        |        |       |       |      |
|------|--------|---------------------------------------|-------------------|--------|--------|-------|-------|------|
| 2543 | P52306 | Rap1 GTPase-GDP dissociation stim     | unknown           | 20.17  | 21.78  | FALSE | FALSE | TRUE |
| 2544 | Q9UPQ9 | Trinucleotide repeat-containing ger   | unknown           | 8.81   | -15.39 | TRUE  | FALSE | TRUE |
| 2545 | P57740 | Nuclear pore complex protein Nup1     | NUCLEUS           | -20.91 | -29.69 | FALSE | FALSE | TRUE |
| 2546 | Q86XZ4 | Spermatogenesis-associated serine     | unknown           | 8.30   | -21.97 | FALSE | FALSE | TRUE |
| 2547 | Q13472 | DNA topoisomerase 3-alpha             | unknown           | -14.50 | -13.17 | FALSE | FALSE | TRUE |
| 2548 | O15400 | Syntaxin-7                            | unknown           | -36.46 | 7.30   | FALSE | FALSE | TRUE |
| 2549 | Q9H1C4 | Protein unc-93 homolog B1             | PM                | -28.29 | 13.58  | FALSE | FALSE | TRUE |
| 2550 | O43824 | Putative GTP-binding protein 6        | MITOCHONDRIA      | 29.80  | -12.41 | FALSE | FALSE | TRUE |
| 2551 | P57737 | Coronin-7                             | unknown           | 30.58  | -16.37 | FALSE | FALSE | TRUE |
| 2552 | Q9UNH7 | Sorting nexin-6                       | unknown           | -10.77 | 16.41  | FALSE | FALSE | TRUE |
| 2553 | P08069 | Insulin-like growth factor 1 receptor | PM                | -22.71 | 17.15  | TRUE  | FALSE | TRUE |
| 2554 | Q96GD0 | Pyridoxal phosphate phosphatase       | unknown           | 14.69  | 9.28   | FALSE | FALSE | TRUE |
| 2555 | Q6Y7W6 | GRB10-interacting GYF protein 2       | unknown           | 8.22   | -25.36 | TRUE  | FALSE | TRUE |
| 2556 | P06400 | Retinoblastoma-associated protein     | unknown           | -14.40 | -15.78 | FALSE | FALSE | TRUE |
| 2557 | O94842 | TOX high mobility group box family    | NUCLEUS           | -20.14 | -27.96 | TRUE  | FALSE | TRUE |
| 2558 | Q96EV2 | RNA-binding protein 33                | NUCLEUS           | 1.88   | -32.03 | FALSE | FALSE | TRUE |
| 2559 | Q8TAF3 | WD repeat-containing protein 48       | unknown           | -8.79  | 4.80   | FALSE | FALSE | TRUE |
| 2560 | Q9BVV7 | Mitochondrial import inner membra     | MITOCHONDRIA      | 29.94  | -14.37 | FALSE | FALSE | TRUE |
| 2561 | Q12830 | Nucleosome-remodeling factor sub      | NUCLEUS           | -24.24 | -23.44 | TRUE  | FALSE | TRUE |
| 2562 | O95218 | Zinc finger Ran-binding domain-con    | unknown           | 21.29  | 11.46  | TRUE  | FALSE | TRUE |
| 2563 | P46734 | Dual specificity mitogen-activated p  | unknown           | 0.24   | -4.33  | FALSE | FALSE | TRUE |
| 2564 | Q15059 | Bromodomain-containing protein 3      | NUCLEUS-CHROMATIN | -25.85 | -23.30 | FALSE | FALSE | TRUE |
| 2565 | O75781 | Paralemmmin-1                         | PM                | -24.48 | 4.68   | FALSE | FALSE | TRUE |
| 2566 | P07942 | Laminin subunit beta-1                | ER                | -0.75  | 37.38  | FALSE | FALSE | TRUE |
| 2567 | Q15006 | ER membrane protein complex sub       | ER                | 0.51   | 35.47  | FALSE | FALSE | TRUE |
| 2568 | Q12834 | Cell division cycle protein 20 homol  | unknown           | -4.91  | -13.45 | FALSE | FALSE | TRUE |
| 2569 | Q9H3P2 | Negative elongation factor A          | unknown           | 13.97  | 2.43   | TRUE  | FALSE | TRUE |
| 2570 | Q9C0F1 | Centrosomal protein of 44 kDa         | unknown           | -11.27 | -1.46  | FALSE | FALSE | TRUE |
| 2571 | Q5T5U3 | Rho GTPase-activating protein 21      | unknown           | -3.50  | -0.61  | TRUE  | FALSE | TRUE |
| 2572 | Q8NFH5 | Nucleoporin NUP35                     | unknown           | 23.39  | -12.29 | FALSE | FALSE | TRUE |
| 2573 | Q96T58 | Msx2-interacting protein              | unknown           | -17.84 | -19.00 | TRUE  | FALSE | TRUE |
| 2574 | Q2KHR3 | Glutamine and serine-rich protein 1   | NUCLEUS-CHROMATIN | -19.97 | -15.07 | TRUE  | FALSE | TRUE |
| 2575 | O43819 | Protein SCO2 homolog, mitochondr      | MITOCHONDRIA      | 35.11  | -6.95  | FALSE | FALSE | TRUE |
| 2576 | Q9NPL8 | Complex I assembly factor TIMMD       | MITOCHONDRIA      | 43.41  | -13.44 | FALSE | FALSE | TRUE |
| 2577 | Q15036 | Sorting nexin-17                      | unknown           | -10.80 | 9.68   | FALSE | FALSE | TRUE |
| 2578 | Q13111 | Chromatin assembly factor 1 subun     | NUCLEUS           | -24.43 | -22.33 | TRUE  | FALSE | TRUE |
| 2579 | Q8IWR0 | Zinc finger CCCH domain-containing    | unknown           | 8.43   | -25.64 | FALSE | FALSE | TRUE |
| 2580 | O00461 | Golgi integral membrane protein 4     | GOLGI             | -20.05 | 32.12  | FALSE | FALSE | TRUE |

|      |        |                                       |              |        |        |       |       |       |
|------|--------|---------------------------------------|--------------|--------|--------|-------|-------|-------|
| 2581 | Q9H4K7 | Mitochondrial ribosome-associated     | MITOCHONDRIA | 35.40  | -14.24 | FALSE | FALSE | TRUE  |
| 2582 | Q9UK59 | Lariat debranching enzyme             | unknown      | 11.20  | -6.54  | FALSE | FALSE | TRUE  |
| 2583 | Q96KQ7 | Histone-lysine N-methyltransferase    | unknown      | -23.43 | -18.78 | FALSE | FALSE | TRUE  |
| 2584 | Q96LJ7 | Dehydrogenase/reductase SDR fan       | unknown      | -1.34  | 26.05  | FALSE | FALSE | TRUE  |
| 2585 | Q5C9Z4 | Nucleolar MIF4G domain-containin      | NUCLEUS      | -3.46  | -34.27 | FALSE | FALSE | TRUE  |
| 2586 | Q9BVC5 | Ashwin                                | NUCLEUS      | 0.43   | -36.92 | FALSE | FALSE | TRUE  |
| 2587 | Q70CQ2 | Ubiquitin carboxyl-terminal hydrola   | unknown      | 16.25  | 7.82   | FALSE | FALSE | TRUE  |
| 2588 | O95865 | N(G),N(G)-dimethylarginine dimeth     | unknown      | 8.82   | 14.28  | FALSE | FALSE | TRUE  |
| 2589 | Q7Z5L9 | Interferon regulatory factor 2-bindin | NUCLEUS      | -13.08 | -19.92 | TRUE  | FALSE | TRUE  |
| 2590 | Q9NRR4 | Ribonuclease 3                        | NUCLEUS      | 0.84   | -25.09 | FALSE | FALSE | TRUE  |
| 2591 | Q13206 | Probable ATP-dependent RNA helic      | NUCLEUS      | -2.77  | -37.15 | FALSE | FALSE | TRUE  |
| 2592 | Q9ULR0 | Pre-mRNA-splicing factor ISY1 hom     | NUCLEUS      | -3.56  | -39.05 | FALSE | FALSE | TRUE  |
| 2593 | Q9BRK4 | Leucine zipper putative tumor supp    | unknown      | -15.02 | 13.08  | TRUE  | FALSE | FALSE |
| 2594 | O00257 | E3 SUMO-protein ligase CBX4           | unknown      | -4.58  | -22.60 | FALSE | FALSE | TRUE  |
| 2595 | Q4KMP7 | TBC1 domain family member 10B         | unknown      | -15.12 | 13.54  | TRUE  | FALSE | FALSE |
| 2596 | P02765 | Alpha-2-HS-glycoprotein               | unknown      | -19.25 | 4.56   | FALSE | FALSE | TRUE  |
| 2597 | P48509 | CD151 antigen                         | unknown      | -21.04 | 21.11  | FALSE | FALSE | TRUE  |
| 2598 | Q9BVS5 | tRNA (adenine(58)-N(1))-methyltra     | unknown      | 44.28  | -12.75 | FALSE | FALSE | TRUE  |
| 2599 | P08572 | Collagen alpha-2(IV) chain            | unknown      | 6.07   | 32.14  | FALSE | FALSE | TRUE  |
| 2600 | Q6YHK3 | CD109 antigen                         | PM           | -22.20 | 14.85  | FALSE | FALSE | TRUE  |
| 2601 | Q12802 | A-kinase anchor protein 13            | unknown      | -3.47  | -5.58  | TRUE  | FALSE | TRUE  |
| 2602 | Q9UQN3 | Charged multivesicular body protei    | unknown      | -18.48 | 6.60   | TRUE  | FALSE | TRUE  |
| 2603 | Q6WCQ1 | Myosin phosphatase Rho-interactir     | unknown      | -1.74  | 4.00   | FALSE | FALSE | TRUE  |
| 2604 | Q9UBI6 | Guanine nucleotide-binding protein    | unknown      | -27.40 | 6.21   | FALSE | FALSE | TRUE  |
| 2605 | O75330 | Hyaluronan mediated motility rece     | unknown      | -3.92  | -11.30 | FALSE | FALSE | TRUE  |
| 2606 | Q69YH5 | Cell division cycle-associated protei | NUCLEUS      | -23.76 | -24.24 | TRUE  | FALSE | TRUE  |
| 2607 | Q03518 | Antigen peptide transporter 1         | unknown      | -5.59  | 23.30  | FALSE | FALSE | TRUE  |
| 2608 | Q969P0 | Immunoglobulin superfamily meml       | PM           | -27.34 | 6.19   | FALSE | FALSE | TRUE  |
| 2609 | P46976 | Glycogenin-1                          | unknown      | 12.25  | -9.33  | FALSE | FALSE | TRUE  |
| 2610 | Q9UI12 | V-type proton ATPase subunit H        | unknown      | -17.54 | 3.89   | FALSE | FALSE | TRUE  |
| 2611 | P78316 | Nucleolar protein 14                  | NUCLEUS      | -0.59  | -41.28 | TRUE  | FALSE | TRUE  |
| 2612 | Q12888 | TP53-binding protein 1                | NUCLEUS      | -20.52 | -32.54 | FALSE | FALSE | TRUE  |
| 2613 | Q9NVH2 | Integrator complex subunit 7          | NUCLEUS      | -18.09 | -23.66 | FALSE | FALSE | TRUE  |
| 2614 | Q14676 | Mediator of DNA damage checkpoi       | unknown      | -22.84 | -15.72 | TRUE  | FALSE | TRUE  |
| 2615 | Q9NVU7 | Protein SDA1 homolog                  | NUCLEUS      | 3.57   | -27.75 | FALSE | FALSE | TRUE  |
| 2616 | P31751 | RAC-beta serine/threonine-protein     | unknown      | 9.73   | 5.69   | FALSE | FALSE | TRUE  |
| 2617 | O43678 | NADH dehydrogenase [ubiquinone]       | MITOCHONDRIA | 31.13  | -12.30 | FALSE | FALSE | TRUE  |
| 2618 | Q8TF74 | WAS/WASL-interacting protein fan      | unknown      | 1.65   | -9.93  | TRUE  | FALSE | TRUE  |

|      |        |                                       |              |        |        |       |       |       |
|------|--------|---------------------------------------|--------------|--------|--------|-------|-------|-------|
| 2619 | Q6ZUT6 | Coiled-coil domain-containing prote   | NUCLEUS      | -1.63  | -27.40 | FALSE | FALSE | TRUE  |
| 2620 | Q96ST3 | Paired amphipathic helix protein Sir  | NUCLEUS      | -25.41 | -24.88 | FALSE | FALSE | TRUE  |
| 2621 | Q9Y5J9 | Mitochondrial import inner membra     | MITOCHONDRIA | 32.35  | -14.03 | FALSE | FALSE | TRUE  |
| 2622 | Q6ULP2 | Aftiphilin                            | unknown      | -32.64 | 16.24  | TRUE  | FALSE | TRUE  |
| 2623 | O14735 | CDP-diacylglycerol--inositol 3-phosp  | ER           | -0.25  | 32.48  | FALSE | FALSE | TRUE  |
| 2624 | Q6UXH1 | Cysteine-rich with EGF-like domain    | unknown      | -1.83  | 39.26  | FALSE | FALSE | TRUE  |
| 2625 | Q9UPN6 | Protein SCAF8                         | NUCLEUS      | 3.85   | -31.21 | FALSE | FALSE | TRUE  |
| 2626 | Q8N5K1 | CDGSH iron-sulfur domain-containir    | ER           | 1.07   | 31.61  | FALSE | FALSE | TRUE  |
| 2627 | O95297 | Myelin protein zero-like protein 1    | PM           | -21.83 | 10.09  | TRUE  | FALSE | TRUE  |
| 2628 | P38435 | Vitamin K-dependent gamma-carbo       | ER           | 1.12   | 33.93  | FALSE | FALSE | TRUE  |
| 2629 | Q9UMY1 | Nucleolar protein 7                   | NUCLEUS      | -1.41  | -39.51 | FALSE | FALSE | TRUE  |
| 2630 | Q15011 | Homocysteine-responsive endoplas      | ER           | -3.59  | 36.45  | TRUE  | FALSE | FALSE |
| 2631 | Q9BRR6 | ADP-dependent glucokinase             | ER           | -3.99  | 32.71  | FALSE | FALSE | TRUE  |
| 2632 | Q9NX46 | Poly(ADP-ribose) glycohydrolase Al    | unknown      | 9.65   | 9.04   | FALSE | FALSE | TRUE  |
| 2633 | Q5F1R6 | DnaJ homolog subfamily C member       | unknown      | 11.73  | -20.39 | FALSE | FALSE | TRUE  |
| 2634 | Q13535 | Serine/threonine-protein kinase AT    | unknown      | -12.22 | -11.67 | FALSE | FALSE | TRUE  |
| 2635 | P49840 | Glycogen synthase kinase-3 alpha      | unknown      | -0.39  | -8.26  | FALSE | FALSE | TRUE  |
| 2636 | P29317 | Ephrin type-A receptor 2              | PM           | -26.25 | 13.89  | TRUE  | FALSE | TRUE  |
| 2637 | Q86TU7 | Histone-lysine N-methyltransferase    | NUCLEUS      | -1.17  | -15.62 | FALSE | FALSE | TRUE  |
| 2638 | O95487 | Protein transport protein Sec24B      | unknown      | -10.94 | 7.32   | TRUE  | FALSE | TRUE  |
| 2639 | Q8ND24 | RING finger protein 214               | unknown      | 6.60   | -22.78 | FALSE | FALSE | TRUE  |
| 2640 | Q6ZU80 | Centrosomal protein of 128 kDa        | unknown      | -15.55 | -11.32 | FALSE | FALSE | TRUE  |
| 2641 | P04156 | Major prion protein                   | unknown      | -25.15 | 10.49  | FALSE | FALSE | TRUE  |
| 2642 | Q8N8S7 | Protein enabled homolog               | unknown      | 1.39   | 9.45   | FALSE | FALSE | TRUE  |
| 2643 | Q6R327 | Rapamycin-insensitive companion c     | unknown      | 1.82   | -12.68 | TRUE  | FALSE | TRUE  |
| 2644 | Q68CP9 | AT-rich interactive domain-containi   | unknown      | -22.30 | -16.41 | TRUE  | FALSE | TRUE  |
| 2645 | Q5T200 | Zinc finger CCCH domain-containing    | unknown      | -13.20 | -18.88 | FALSE | FALSE | TRUE  |
| 2646 | Q8WX92 | Negative elongation factor B          | NUCLEUS      | 10.08  | -5.27  | FALSE | FALSE | TRUE  |
| 2647 | Q8IYB7 | DIS3-like exonuclease 2               | unknown      | 11.75  | 4.74   | FALSE | FALSE | TRUE  |
| 2648 | Q9NRY4 | Rho GTPase-activating protein 35      | unknown      | -3.24  | -1.46  | FALSE | FALSE | TRUE  |
| 2649 | Q9H1B7 | Interferon regulatory factor 2-bindin | NUCLEUS      | -13.07 | -19.87 | FALSE | FALSE | TRUE  |
| 2650 | P61764 | Syntaxin-binding protein 1            | unknown      | -20.59 | 5.55   | FALSE | FALSE | TRUE  |
| 2651 | Q9H4F8 | SPARC-related modular calcium-bin     | unknown      | -31.23 | 10.78  | FALSE | FALSE | TRUE  |
| 2652 | Q99816 | Tumor susceptibility gene 101 prote   | unknown      | -9.06  | 4.13   | FALSE | FALSE | TRUE  |
| 2653 | Q9BYD2 | 39S ribosomal protein L9, mitochon    | unknown      | 44.66  | -12.64 | FALSE | FALSE | TRUE  |
| 2654 | O95248 | Myotubularin-related protein 5        | unknown      | -1.41  | -7.72  | TRUE  | FALSE | TRUE  |
| 2655 | P05067 | Amyloid-beta A4 protein               | unknown      | -21.73 | 13.94  | FALSE | FALSE | TRUE  |
| 2656 | Q9NP81 | Serine--tRNA ligase, mitochondrial    | MITOCHONDRIA | 38.76  | -8.37  | FALSE | FALSE | TRUE  |

|      |        |                                       |                   |        |        |       |       |       |
|------|--------|---------------------------------------|-------------------|--------|--------|-------|-------|-------|
| 2657 | P11310 | Medium-chain specific acyl-CoA de     | MITOCHONDRIA      | 38.03  | -7.35  | FALSE | FALSE | TRUE  |
| 2658 | Q8TAA9 | Vang-like protein 1                   | PM                | -24.79 | 18.00  | TRUE  | FALSE | TRUE  |
| 2659 | O94915 | Protein furry homolog-like            | unknown           | -1.79  | -7.18  | FALSE | FALSE | TRUE  |
| 2660 | Q66K74 | Microtubule-associated protein 1S     | NUCLEUS           | -8.49  | -15.37 | FALSE | FALSE | TRUE  |
| 2661 | Q5VUA4 | Zinc finger protein 318               | NUCLEUS           | -9.04  | -23.03 | TRUE  | FALSE | TRUE  |
| 2662 | Q13596 | Sorting nexin-1                       | unknown           | -10.82 | 16.49  | TRUE  | FALSE | TRUE  |
| 2663 | O43556 | Epsilon-sarcoglycan                   | unknown           | -15.52 | 15.90  | FALSE | FALSE | TRUE  |
| 2664 | Q9NPA0 | ER membrane protein complex sub       | unknown           | 0.20   | 35.64  | FALSE | FALSE | TRUE  |
| 2665 | Q7Z3K3 | Pogo transposable element with ZN     | NUCLEUS           | -24.77 | -23.80 | FALSE | FALSE | TRUE  |
| 2666 | Q8WWN8 | Arf-GAP with Rho-GAP domain, ANI      | unknown           | -3.59  | 9.97   | FALSE | FALSE | TRUE  |
| 2667 | O00400 | Acetyl-coenzyme A transporter 1       | ER                | 2.76   | 31.38  | FALSE | FALSE | TRUE  |
| 2668 | Q92541 | RNA polymerase-associated protein     | unknown           | 22.26  | 15.53  | FALSE | FALSE | TRUE  |
| 2669 | Q9Y6I4 | Ubiquitin carboxyl-terminal hydrola   | NUCLEUS-CHROMATIN | -21.33 | -13.44 | FALSE | FALSE | TRUE  |
| 2670 | Q06481 | Amyloid-like protein 2                | PM                | -29.87 | 12.50  | FALSE | FALSE | TRUE  |
| 2671 | Q99720 | Sigma non-opioid intracellular recep  | unknown           | -0.89  | 32.57  | FALSE | FALSE | TRUE  |
| 2672 | P54619 | 5'-AMP-activated protein kinase su    | unknown           | 9.70   | 4.65   | FALSE | FALSE | TRUE  |
| 2673 | Q7Z2Z2 | Elongation factor-like GTPase 1       | unknown           | 0.92   | -5.98  | FALSE | FALSE | TRUE  |
| 2674 | Q92820 | Gamma-glutamyl hydrolase              | LYSOSOME          | -39.57 | 8.50   | FALSE | FALSE | TRUE  |
| 2675 | P30825 | High affinity cationic amino acid tra | PM                | -20.76 | 23.21  | TRUE  | FALSE | TRUE  |
| 2676 | O95149 | Snurportin-1                          | unknown           | 15.99  | 7.19   | FALSE | FALSE | TRUE  |
| 2677 | Q02750 | Dual specificity mitogen-activated p  | unknown           | 15.12  | 5.63   | FALSE | FALSE | TRUE  |
| 2678 | Q9NWV8 | BRISC and BRCA1-A complex memk        | unknown           | 12.43  | 1.68   | FALSE | FALSE | TRUE  |
| 2679 | Q8NI35 | InaD-like protein                     | unknown           | -15.70 | 13.53  | TRUE  | FALSE | TRUE  |
| 2680 | Q6IAN0 | Dehydrogenase/reductase SDR fan       | ER                | 2.62   | 31.96  | FALSE | FALSE | TRUE  |
| 2681 | Q9HC52 | Chromobox protein homolog 8           | NUCLEUS-CHROMATIN | -21.73 | -13.90 | FALSE | FALSE | TRUE  |
| 2682 | Q01995 | Transgelin                            | unknown           | 13.09  | 10.79  | TRUE  | FALSE | TRUE  |
| 2683 | Q70J99 | Protein unc-13 homolog D              | unknown           | -2.34  | -7.24  | FALSE | FALSE | TRUE  |
| 2684 | Q8NEY8 | Periphrin-1                           | NUCLEUS           | -2.52  | -32.59 | TRUE  | FALSE | TRUE  |
| 2685 | Q9Y6N7 | Roundabout homolog 1                  | PM                | -26.17 | 4.56   | TRUE  | FALSE | TRUE  |
| 2686 | Q7Z589 | BRCA2-interacting transcriptional re  | NUCLEUS           | -7.77  | -24.03 | TRUE  | FALSE | TRUE  |
| 2687 | Q5VYS8 | Terminal uridylyltransferase 7        | unknown           | 3.29   | -17.20 | FALSE | FALSE | TRUE  |
| 2688 | Q9UK45 | U6 snRNA-associated Sm-like prote     | NUCLEUS           | -10.29 | -30.49 | FALSE | FALSE | TRUE  |
| 2689 | Q9H857 | 5'-nucleotidase domain-containing     | MITOCHONDRIA      | 40.79  | -10.29 | FALSE | FALSE | TRUE  |
| 2690 | Q7Z4H3 | HD domain-containing protein 2        | unknown           | 14.61  | 9.47   | FALSE | FALSE | TRUE  |
| 2691 | Q6IN84 | rRNA methyltransferase 1, mitoch      | MITOCHONDRIA      | 36.80  | -5.92  | FALSE | FALSE | TRUE  |
| 2692 | Q15742 | NGFI-A-binding protein 2              | NUCLEUS           | -9.30  | -14.07 | TRUE  | FALSE | FALSE |
| 2693 | Q15154 | Pericentriolar material 1 protein     | unknown           | -14.78 | -16.22 | TRUE  | FALSE | TRUE  |
| 2694 | Q9Y2X9 | Zinc finger protein 281               | NUCLEUS           | -6.01  | -30.80 | TRUE  | FALSE | TRUE  |

|      |        |                                       |              |        |        |       |       |       |
|------|--------|---------------------------------------|--------------|--------|--------|-------|-------|-------|
| 2695 | P11171 | Protein 4.1                           | unknown      | -16.99 | 14.33  | TRUE  | FALSE | TRUE  |
| 2696 | O43617 | Trafficking protein particle complex  | unknown      | -11.68 | 5.39   | FALSE | FALSE | TRUE  |
| 2697 | Q5JTZ9 | Alanine--tRNA ligase, mitochondrial   | MITOCHONDRIA | 37.23  | -7.72  | FALSE | FALSE | TRUE  |
| 2698 | P54132 | Bloom syndrome protein                | unknown      | -22.93 | -19.37 | TRUE  | FALSE | TRUE  |
| 2699 | O43379 | WD repeat-containing protein 62       | unknown      | 13.91  | 0.74   | FALSE | FALSE | TRUE  |
| 2700 | Q9HCD6 | Protein TANC2                         | unknown      | -6.65  | 2.73   | TRUE  | FALSE | TRUE  |
| 2701 | Q9Y3A2 | Probable U3 small nucleolar RNA-as    | NUCLEUS      | -1.36  | -40.83 | FALSE | FALSE | TRUE  |
| 2702 | Q12986 | Transcriptional repressor NF-X1       | unknown      | 13.70  | -20.67 | TRUE  | FALSE | TRUE  |
| 2703 | O75962 | Triple functional domain protein      | unknown      | -5.04  | -7.52  | FALSE | FALSE | TRUE  |
| 2704 | A1X283 | SH3 and PX domain-containing prot     | unknown      | -11.33 | -16.22 | FALSE | FALSE | TRUE  |
| 2705 | O94855 | Protein transport protein Sec24D      | unknown      | 4.95   | -9.85  | FALSE | FALSE | TRUE  |
| 2706 | Q5VTR2 | E3 ubiquitin-protein ligase BRE1A     | NUCLEUS      | -7.76  | -26.87 | FALSE | FALSE | TRUE  |
| 2707 | O75146 | Huntingtin-interacting protein 1-rela | unknown      | -6.41  | -7.83  | FALSE | FALSE | TRUE  |
| 2708 | Q2TBE0 | CWF19-like protein 2                  | NUCLEUS      | -4.09  | -23.85 | TRUE  | FALSE | TRUE  |
| 2709 | Q8IZ21 | Phosphatase and actin regulator 4     | unknown      | -1.26  | 12.44  | TRUE  | FALSE | TRUE  |
| 2710 | Q14118 | Dystroglycan                          | PM           | -19.49 | 16.58  | TRUE  | FALSE | FALSE |
| 2711 | Q7Z2K8 | G protein-regulated inducer of neur   | PM           | -24.30 | 4.61   | TRUE  | FALSE | TRUE  |
| 2712 | Q8IZA0 | Dyslexia-associated protein KIAA03    | unknown      | -35.41 | 14.57  | TRUE  | FALSE | TRUE  |
| 2713 | Q13586 | Stromal interaction molecule 1        | ER           | -2.35  | 34.28  | TRUE  | FALSE | TRUE  |
| 2714 | P46109 | Crk-like protein                      | unknown      | 14.35  | 15.51  | TRUE  | FALSE | FALSE |
| 2715 | Q8TF72 | Protein Shroom3                       | unknown      | -4.95  | 13.80  | TRUE  | FALSE | TRUE  |
| 2716 | P42566 | Epidermal growth factor receptor su   | unknown      | 7.80   | 12.65  | TRUE  | FALSE | TRUE  |
| 2717 | P07947 | Tyrosine-protein kinase Yes           | PM           | -25.63 | 12.21  | TRUE  | FALSE | FALSE |
| 2718 | Q9Y5K6 | CD2-associated protein                | NUCLEUS      | -9.95  | -13.22 | TRUE  | FALSE | FALSE |
| 2719 | Q2M2I8 | AP2-associated protein kinase 1       | unknown      | -6.18  | 8.44   | TRUE  | FALSE | FALSE |
| 2720 | P25054 | Adenomatous polyposis coli proteir    | unknown      | -6.36  | 3.05   | TRUE  | FALSE | TRUE  |
| 2721 | Q9H1K0 | Rabenosyn-5                           | unknown      | 7.69   | -18.50 | TRUE  | FALSE | TRUE  |
| 2722 | Q641Q2 | WASH complex subunit 2A               | unknown      | -15.61 | 10.30  | TRUE  | FALSE | FALSE |
| 2723 | Q96AT1 | Uncharacterized protein KIAA1143      | unknown      | 10.77  | -3.22  | TRUE  | FALSE | FALSE |



| Row<br>Number | Abundances |            |           |             |           |             | EluteGRvsWas | EluteGRvsWas | ElutePCFTvsW | ElutePCFTvsW |
|---------------|------------|------------|-----------|-------------|-----------|-------------|--------------|--------------|--------------|--------------|
|               | Elute.GR   | Elute.PCFT | Wash01.GR | Wash01.PCFT | Wash02.GR | Wash02.PCFT | h01GR        | h02GR        | ash01PCFT    | ash02PCFT    |
| 1             | 6.53E+08   | 8.00E+08   | 1.55E+12  | 1.50E+12    | 8.75E+09  | 9.96E+09    | 4.20E-04     | 7.46E-02     | 5.32E-04     | 8.04E-02     |
| 2             | NA         | NA         | 1.55E+12  | 1.50E+12    | 8.75E+09  | 9.96E+09    | NA           | NA           | NA           | NA           |
| 3             | 2.62E+09   | 7.88E+09   | 2.34E+11  | 2.78E+11    | 6.64E+09  | 9.11E+09    | 1.12E-02     | 3.95E-01     | 2.84E-02     | 8.65E-01     |
| 4             | 1.55E+07   | 6.02E+06   | 9.03E+10  | 9.05E+10    | 2.32E+08  | 1.70E+08    | 1.71E-04     | 6.69E-02     | 6.66E-05     | 3.54E-02     |
| 5             | 7.69E+06   | 1.06E+06   | 8.40E+10  | 8.49E+10    | 2.91E+08  | 2.53E+08    | 9.16E-05     | 2.65E-02     | 1.24E-05     | 4.18E-03     |
| 6             | 7.62E+07   | 4.07E+06   | 7.24E+10  | 8.43E+10    | 1.06E+08  | 1.44E+08    | 1.05E-03     | 7.16E-01     | 4.83E-05     | 2.83E-02     |
| 7             | 5.32E+07   | 6.42E+07   | 7.56E+10  | 7.99E+10    | 4.16E+08  | 3.21E+08    | 7.04E-04     | 1.28E-01     | 8.04E-04     | 2.00E-01     |
| 8             | 1.62E+08   | 2.23E+08   | 7.08E+10  | 7.95E+10    | 6.76E+08  | 1.01E+09    | 2.29E-03     | 2.40E-01     | 2.80E-03     | 2.22E-01     |
| 9             | 2.58E+08   | 7.05E+07   | 6.46E+10  | 8.38E+10    | 6.88E+08  | 1.28E+09    | 4.00E-03     | 3.75E-01     | 8.41E-04     | 5.50E-02     |
| 10            | 1.12E+07   | 1.27E+07   | 7.42E+10  | 6.74E+10    | 7.77E+07  | 9.97E+07    | 1.50E-04     | 1.44E-01     | 1.89E-04     | 1.28E-01     |
| 11            | 5.34E+06   | 1.59E+07   | 6.66E+10  | 5.98E+10    | 1.35E+08  | 1.48E+08    | 8.02E-05     | 3.96E-02     | 2.66E-04     | 1.07E-01     |
| 12            | 2.38E+07   | 3.05E+07   | 5.86E+10  | 6.42E+10    | 5.01E+08  | 4.69E+08    | 4.06E-04     | 4.75E-02     | 4.76E-04     | 6.51E-02     |
| 13            | 1.58E+07   | 1.90E+06   | 5.98E+10  | 5.97E+10    | 1.51E+08  | 1.47E+08    | 2.65E-04     | 1.05E-01     | 3.18E-05     | 1.30E-02     |
| 14            | 1.33E+07   | 3.77E+07   | 5.97E+10  | 5.84E+10    | 1.58E+08  | 1.87E+08    | 2.22E-04     | 8.41E-02     | 6.46E-04     | 2.02E-01     |
| 15            | 1.54E+07   | 5.83E+06   | 5.84E+10  | 5.82E+10    | 2.00E+08  | 1.42E+08    | 2.63E-04     | 7.68E-02     | 1.00E-04     | 4.10E-02     |
| 16            | NA         | NA         | 5.56E+10  | 5.35E+10    | 2.03E+08  | 1.13E+08    | NA           | NA           | NA           | NA           |
| 17            | 4.32E+07   | 3.39E+07   | 5.26E+10  | 5.26E+10    | 1.51E+08  | 1.76E+08    | 8.20E-04     | 2.85E-01     | 6.45E-04     | 1.93E-01     |
| 18            | 4.80E+07   | 7.93E+06   | 4.93E+10  | 5.27E+10    | 3.13E+08  | 2.26E+08    | 9.74E-04     | 1.54E-01     | 1.50E-04     | 3.51E-02     |
| 19            | 1.58E+07   | 1.90E+06   | 5.16E+10  | 5.06E+10    | 1.33E+08  | 1.22E+08    | 3.07E-04     | 1.19E-01     | 3.75E-05     | 1.55E-02     |
| 20            | 1.83E+06   | 6.19E+05   | 4.30E+10  | 4.41E+10    | 4.66E+07  | 6.17E+07    | 4.24E-05     | 3.92E-02     | 1.41E-05     | 1.00E-02     |
| 21            | 8.41E+05   | 1.29E+06   | 3.93E+10  | 4.38E+10    | 2.66E+07  | 2.86E+07    | 2.14E-05     | 3.17E-02     | 2.95E-05     | 4.53E-02     |
| 22            | 6.41E+07   | 1.81E+06   | 3.70E+10  | 3.69E+10    | 4.49E+07  | 5.95E+07    | 1.73E-03     | 1.43E+00     | 4.89E-05     | 3.03E-02     |
| 23            | NA         | NA         | 3.63E+10  | 3.60E+10    | 2.32E+07  | 4.11E+07    | NA           | NA           | NA           | NA           |
| 24            | 0.00E+00   | 4.48E+06   | 3.16E+10  | 3.64E+10    | 7.50E+07  | 1.07E+08    | 0.00E+00     | 0.00E+00     | 1.23E-04     | 4.19E-02     |
| 25            | 6.76E+06   | 1.32E+06   | 3.15E+10  | 3.62E+10    | 7.14E+07  | 8.78E+07    | 2.15E-04     | 9.47E-02     | 3.65E-05     | 1.50E-02     |
| 26            | NA         | NA         | 2.11E+10  | 4.38E+10    | 4.37E+08  | 3.32E+08    | NA           | NA           | NA           | NA           |
| 27            | 1.81E+07   | 3.14E+06   | 2.91E+10  | 3.16E+10    | 3.86E+07  | 5.03E+07    | 6.22E-04     | 4.70E-01     | 9.91E-05     | 6.23E-02     |
| 28            | NA         | NA         | 3.02E+10  | 3.00E+10    | 1.11E+08  | 1.10E+08    | NA           | NA           | NA           | NA           |
| 29            | NA         | NA         | 2.78E+10  | 2.98E+10    | 1.09E+08  | 1.15E+08    | NA           | NA           | NA           | NA           |
| 30            | 3.99E+05   | 9.55E+05   | 2.93E+10  | 2.75E+10    | 8.32E+07  | 7.45E+07    | 1.37E-05     | 4.80E-03     | 3.48E-05     | 1.28E-02     |
| 31            | 1.11E+07   | 6.98E+06   | 2.74E+10  | 2.85E+10    | 4.74E+07  | 4.69E+07    | 4.06E-04     | 2.35E-01     | 2.45E-04     | 1.49E-01     |
| 32            | 1.65E+07   | 1.46E+06   | 2.27E+10  | 3.13E+10    | 1.01E+08  | 7.98E+07    | 7.25E-04     | 1.63E-01     | 4.66E-05     | 1.83E-02     |
| 33            | NA         | NA         | 2.45E+10  | 2.63E+10    | 1.03E+08  | 7.37E+07    | NA           | NA           | NA           | NA           |
| 34            | 3.23E+08   | 1.05E+08   | 2.03E+10  | 2.45E+10    | 1.25E+09  | 1.49E+09    | 1.59E-02     | 2.58E-01     | 4.30E-03     | 7.09E-02     |

|    |          |          |          |          |          |          |          |          |          |          |
|----|----------|----------|----------|----------|----------|----------|----------|----------|----------|----------|
| 35 | 6.09E+05 | 8.38E+05 | 2.23E+10 | 2.39E+10 | 6.67E+07 | 9.42E+07 | 2.73E-05 | 9.13E-03 | 3.51E-05 | 8.90E-03 |
| 36 | 1.87E+07 | 7.99E+06 | 2.32E+10 | 2.23E+10 | 8.34E+07 | 1.01E+08 | 8.07E-04 | 2.25E-01 | 3.58E-04 | 7.92E-02 |
| 37 | 1.97E+07 | 7.40E+06 | 2.20E+10 | 2.34E+10 | 6.76E+07 | 5.01E+07 | 8.96E-04 | 2.92E-01 | 3.17E-04 | 1.48E-01 |
| 38 | 8.36E+05 | 3.38E+06 | 2.23E+10 | 2.26E+10 | 5.45E+07 | 8.26E+07 | 3.75E-05 | 1.53E-02 | 1.49E-04 | 4.09E-02 |
| 39 | 0.00E+00 | 0.00E+00 | 2.04E+10 | 2.32E+10 | 3.44E+07 | 4.40E+07 | 0.00E+00 | 0.00E+00 | 0.00E+00 | 0.00E+00 |
| 40 | 6.95E+06 | 1.28E+07 | 2.17E+10 | 2.12E+10 | 7.91E+07 | 4.71E+07 | 3.21E-04 | 8.78E-02 | 6.01E-04 | 2.71E-01 |
| 41 | NA       | NA       | 2.11E+10 | 2.05E+10 | 2.70E+07 | 3.15E+07 | NA       | NA       | NA       | NA       |
| 42 | 2.67E+06 | 0.00E+00 | 1.99E+10 | 2.12E+10 | 2.28E+07 | 2.87E+07 | 1.34E-04 | 1.17E-01 | 0.00E+00 | 0.00E+00 |
| 43 | NA       | NA       | 1.95E+10 | 2.09E+10 | 6.72E+07 | 9.56E+07 | NA       | NA       | NA       | NA       |
| 44 | NA       | NA       | 1.90E+10 | 2.11E+10 | 3.57E+07 | 5.15E+07 | NA       | NA       | NA       | NA       |
| 45 | 1.20E+08 | 6.29E+07 | 1.79E+10 | 2.09E+10 | 4.64E+08 | 5.03E+08 | 6.68E-03 | 2.59E-01 | 3.01E-03 | 1.25E-01 |
| 46 | 2.34E+05 | 2.29E+06 | 1.84E+10 | 1.92E+10 | 6.47E+07 | 9.57E+07 | 1.28E-05 | 3.62E-03 | 1.20E-04 | 2.40E-02 |
| 47 | 0.00E+00 | 0.00E+00 | 1.78E+10 | 1.95E+10 | 1.07E+07 | 1.43E+07 | 0.00E+00 | 0.00E+00 | 0.00E+00 | 0.00E+00 |
| 48 | 8.25E+06 | 1.47E+06 | 1.72E+10 | 1.83E+10 | 2.36E+07 | 2.41E+07 | 4.80E-04 | 3.50E-01 | 8.06E-05 | 6.12E-02 |
| 49 | 5.44E+06 | 2.50E+06 | 1.67E+10 | 1.82E+10 | 1.93E+07 | 2.41E+07 | 3.26E-04 | 2.83E-01 | 1.37E-04 | 1.04E-01 |
| 50 | 1.30E+07 | 2.06E+07 | 1.53E+10 | 1.84E+10 | 1.90E+08 | 2.24E+08 | 8.45E-04 | 6.83E-02 | 1.12E-03 | 9.22E-02 |
| 51 | NA       | NA       | 1.63E+10 | 1.69E+10 | 6.77E+07 | 6.03E+07 | NA       | NA       | NA       | NA       |
| 52 | 7.50E+06 | 2.95E+06 | 1.54E+10 | 1.78E+10 | 5.49E+07 | 2.69E+07 | 4.87E-04 | 1.37E-01 | 1.66E-04 | 1.09E-01 |
| 53 | NA       | NA       | 1.64E+10 | 1.67E+10 | 3.92E+07 | 4.73E+07 | NA       | NA       | NA       | NA       |
| 54 | NA       | NA       | 1.68E+10 | 1.60E+10 | 2.79E+07 | 2.23E+07 | NA       | NA       | NA       | NA       |
| 55 | NA       | NA       | 1.71E+10 | 1.55E+10 | 1.22E+07 | 2.61E+07 | NA       | NA       | NA       | NA       |
| 56 | 0.00E+00 | 0.00E+00 | 1.46E+10 | 1.71E+10 | 9.33E+07 | 6.17E+07 | 0.00E+00 | 0.00E+00 | 0.00E+00 | 0.00E+00 |
| 57 | 8.55E+06 | 3.70E+05 | 1.39E+10 | 1.73E+10 | 7.78E+07 | 8.08E+07 | 6.14E-04 | 1.10E-01 | 2.14E-05 | 4.58E-03 |
| 58 | 8.55E+06 | 3.70E+05 | 1.39E+10 | 1.73E+10 | 7.78E+07 | 8.08E+07 | 6.14E-04 | 1.10E-01 | 2.14E-05 | 4.58E-03 |
| 59 | NA       | NA       | 1.29E+10 | 1.66E+10 | 5.73E+07 | 8.54E+07 | NA       | NA       | NA       | NA       |
| 60 | 2.57E+08 | 7.95E+07 | 1.43E+10 | 1.50E+10 | 6.25E+06 | 3.57E+07 | 1.80E-02 | 4.12E+01 | 5.31E-03 | 2.22E+00 |
| 61 | NA       | NA       | 1.38E+10 | 1.43E+10 | 4.43E+07 | 4.52E+07 | NA       | NA       | NA       | NA       |
| 62 | 0.00E+00 | 0.00E+00 | 1.36E+10 | 1.42E+10 | 4.37E+07 | 7.94E+07 | 0.00E+00 | 0.00E+00 | 0.00E+00 | 0.00E+00 |
| 63 | NA       | NA       | 1.38E+10 | 1.34E+10 | 4.01E+07 | 5.77E+07 | NA       | NA       | NA       | NA       |
| 64 | NA       | NA       | 1.38E+10 | 1.22E+10 | 7.49E+07 | 6.79E+07 | NA       | NA       | NA       | NA       |
| 65 | 8.94E+07 | 2.34E+08 | 1.23E+10 | 1.27E+10 | 4.03E+07 | 2.66E+07 | 7.24E-03 | 2.22E+00 | 1.84E-02 | 8.80E+00 |
| 66 | 1.69E+09 | 7.18E+09 | 1.31E+10 | 1.17E+10 | 2.17E+07 | 2.01E+08 | 1.29E-01 | 7.77E+01 | 6.16E-01 | 3.57E+01 |
| 67 | 0.00E+00 | 1.69E+05 | 1.20E+10 | 1.28E+10 | 2.09E+07 | 2.04E+07 | 0.00E+00 | 0.00E+00 | 1.33E-05 | 8.32E-03 |
| 68 | 1.69E+07 | 2.10E+06 | 1.22E+10 | 1.25E+10 | 4.01E+07 | 3.62E+07 | 1.39E-03 | 4.21E-01 | 1.69E-04 | 5.81E-02 |
| 69 | NA       | NA       | 1.07E+10 | 1.29E+10 | NA       | NA       | NA       | NA       | NA       | NA       |
| 70 | 7.47E+08 | 1.75E+08 | 1.25E+10 | 1.08E+10 | 1.01E+08 | 9.48E+07 | 5.98E-02 | 7.39E+00 | 1.63E-02 | 1.84E+00 |
| 71 | 0.00E+00 | 1.31E+06 | 1.15E+10 | 1.13E+10 | 1.83E+07 | 2.95E+07 | 0.00E+00 | 0.00E+00 | 1.15E-04 | 4.44E-02 |
| 72 | 0.00E+00 | 9.48E+05 | 9.79E+09 | 1.22E+10 | 3.70E+07 | 4.98E+07 | 0.00E+00 | 0.00E+00 | 7.77E-05 | 1.90E-02 |

|     |          |          |          |          |          |          |          |          |          |          |
|-----|----------|----------|----------|----------|----------|----------|----------|----------|----------|----------|
| 73  | NA       | NA       | 1.13E+10 | 1.05E+10 | 3.74E+07 | 5.12E+07 | NA       | NA       | NA       | NA       |
| 74  | 4.60E+05 | 9.81E+06 | 1.14E+10 | 1.05E+10 | 1.51E+07 | 3.86E+07 | 4.05E-05 | 3.04E-02 | 9.37E-04 | 2.54E-01 |
| 75  | 4.02E+05 | 0.00E+00 | 1.05E+10 | 1.10E+10 | 2.75E+07 | 5.20E+07 | 3.83E-05 | 1.46E-02 | 0.00E+00 | 0.00E+00 |
| 76  | NA       | NA       | 1.10E+10 | 1.05E+10 | 2.92E+07 | 3.64E+07 | NA       | NA       | NA       | NA       |
| 77  | NA       | NA       | 1.02E+10 | 1.13E+10 | 1.97E+07 | 2.41E+07 | NA       | NA       | NA       | NA       |
| 78  | 6.84E+06 | 3.25E+06 | 1.03E+10 | 1.11E+10 | 1.49E+07 | 1.69E+07 | 6.64E-04 | 4.59E-01 | 2.93E-04 | 1.92E-01 |
| 79  | 0.00E+00 | 1.53E+06 | 1.02E+10 | 1.10E+10 | 3.65E+07 | 4.30E+07 | 0.00E+00 | 0.00E+00 | 1.40E-04 | 3.57E-02 |
| 80  | 2.92E+06 | 3.19E+06 | 1.01E+10 | 1.09E+10 | 2.48E+07 | 3.38E+07 | 2.90E-04 | 1.18E-01 | 2.92E-04 | 9.44E-02 |
| 81  | 1.61E+09 | 7.09E+08 | 1.04E+10 | 1.04E+10 | 4.12E+07 | 1.80E+08 | 1.55E-01 | 3.91E+01 | 6.81E-02 | 3.93E+00 |
| 82  | 6.21E+07 | 4.03E+07 | 9.86E+09 | 1.11E+10 | 1.83E+07 | 2.71E+07 | 6.30E-03 | 3.40E+00 | 3.64E-03 | 1.49E+00 |
| 83  | 0.00E+00 | 3.50E+06 | 1.02E+10 | 1.04E+10 | 4.56E+07 | 5.30E+07 | 0.00E+00 | 0.00E+00 | 3.38E-04 | 6.60E-02 |
| 84  | 6.46E+06 | 4.01E+06 | 9.70E+09 | 1.08E+10 | 2.70E+07 | 2.70E+07 | 6.65E-04 | 2.39E-01 | 3.72E-04 | 1.49E-01 |
| 85  | NA       | NA       | 9.69E+09 | 1.07E+10 | 3.90E+07 | 6.29E+07 | NA       | NA       | NA       | NA       |
| 86  | NA       | NA       | 9.50E+09 | 1.08E+10 | 3.13E+07 | 3.67E+07 | NA       | NA       | NA       | NA       |
| 87  | NA       | NA       | 9.04E+09 | 1.08E+10 | 2.05E+07 | 2.20E+07 | NA       | NA       | NA       | NA       |
| 88  | 1.50E+07 | 1.44E+07 | 8.42E+09 | 1.10E+10 | 1.86E+07 | 2.45E+07 | 1.78E-03 | 8.05E-01 | 1.32E-03 | 5.90E-01 |
| 89  | 4.39E+06 | 0.00E+00 | 9.71E+09 | 9.55E+09 | 8.52E+06 | 1.02E+07 | 4.52E-04 | 5.15E-01 | 0.00E+00 | 0.00E+00 |
| 90  | 0.00E+00 | 1.42E+07 | 1.00E+10 | 8.54E+09 | 3.40E+07 | 5.03E+07 | 0.00E+00 | 0.00E+00 | 1.66E-03 | 2.82E-01 |
| 91  | NA       | NA       | 9.35E+09 | 9.24E+09 | 9.65E+06 | 7.62E+06 | NA       | NA       | NA       | NA       |
| 92  | NA       | NA       | 9.64E+09 | 8.83E+09 | 1.69E+07 | 8.64E+06 | NA       | NA       | NA       | NA       |
| 93  | NA       | NA       | 9.56E+09 | 8.87E+09 | 4.26E+07 | 1.84E+07 | NA       | NA       | NA       | NA       |
| 94  | 7.98E+06 | 2.65E+06 | 8.99E+09 | 9.35E+09 | 5.67E+07 | 5.85E+07 | 8.88E-04 | 1.41E-01 | 2.83E-04 | 4.53E-02 |
| 95  | NA       | NA       | 8.72E+09 | 9.51E+09 | 5.26E+06 | 5.22E+06 | NA       | NA       | NA       | NA       |
| 96  | NA       | NA       | 9.66E+09 | 8.50E+09 | 1.05E+07 | 1.74E+07 | NA       | NA       | NA       | NA       |
| 97  | NA       | NA       | 9.04E+09 | 8.93E+09 | 2.00E+07 | 3.46E+07 | NA       | NA       | NA       | NA       |
| 98  | NA       | NA       | 9.04E+09 | 8.94E+09 | 1.77E+07 | 1.29E+07 | NA       | NA       | NA       | NA       |
| 99  | 0.00E+00 | 5.90E+05 | 8.90E+09 | 8.87E+09 | 2.19E+07 | 1.98E+07 | 0.00E+00 | 0.00E+00 | 6.65E-05 | 2.98E-02 |
| 100 | NA       | NA       | 9.24E+09 | 8.37E+09 | 1.12E+07 | 9.77E+06 | NA       | NA       | NA       | NA       |
| 101 | 0.00E+00 | 0.00E+00 | 8.94E+09 | 8.34E+09 | 2.27E+07 | 1.32E+07 | 0.00E+00 | 0.00E+00 | 0.00E+00 | 0.00E+00 |
| 102 | 1.88E+07 | 3.45E+06 | 8.31E+09 | 8.97E+09 | 2.05E+07 | 8.49E+06 | 2.27E-03 | 9.17E-01 | 3.84E-04 | 4.06E-01 |
| 103 | NA       | NA       | 9.08E+09 | 8.11E+09 | 3.65E+07 | 1.42E+07 | NA       | NA       | NA       | NA       |
| 104 | NA       | NA       | 8.64E+09 | 8.50E+09 | 9.38E+06 | 1.64E+07 | NA       | NA       | NA       | NA       |
| 105 | NA       | NA       | 8.74E+09 | 8.37E+09 | 2.06E+07 | 1.66E+07 | NA       | NA       | NA       | NA       |
| 106 | 8.75E+07 | 0.00E+00 | 7.29E+09 | 9.37E+09 | 3.41E+07 | 2.51E+07 | 1.20E-02 | 2.57E+00 | 0.00E+00 | 0.00E+00 |
| 107 | 3.09E+05 | 0.00E+00 | 9.84E+09 | 6.82E+09 | 8.08E+06 | 4.62E+06 | 3.14E-05 | 3.83E-02 | 0.00E+00 | 0.00E+00 |
| 108 | 3.08E+06 | 1.79E+06 | 8.66E+09 | 7.72E+09 | 2.76E+07 | 2.41E+07 | 3.56E-04 | 1.12E-01 | 2.32E-04 | 7.44E-02 |
| 109 | NA       | NA       | 8.69E+09 | 7.59E+09 | 3.60E+07 | 6.82E+07 | NA       | NA       | NA       | NA       |
| 110 | NA       | NA       | 7.90E+09 | 8.29E+09 | 1.30E+07 | 1.72E+07 | NA       | NA       | NA       | NA       |

|     |          |          |          |          |          |          |          |          |          |          |
|-----|----------|----------|----------|----------|----------|----------|----------|----------|----------|----------|
| 111 | NA       | NA       | 7.49E+09 | 8.47E+09 | 2.89E+07 | 8.95E+06 | NA       | NA       | NA       | NA       |
| 112 | 2.94E+06 | 1.66E+07 | 7.96E+09 | 7.86E+09 | 2.47E+07 | 9.65E+06 | 3.70E-04 | 1.19E-01 | 2.11E-03 | 1.72E+00 |
| 113 | NA       | NA       | 6.46E+09 | 8.64E+09 | 2.49E+07 | 2.95E+07 | NA       | NA       | NA       | NA       |
| 114 | 3.26E+05 | 0.00E+00 | 7.65E+09 | 7.45E+09 | 1.43E+07 | 1.53E+07 | 4.26E-05 | 2.29E-02 | 0.00E+00 | 0.00E+00 |
| 115 | NA       | NA       | 7.56E+09 | 7.49E+09 | 1.16E+07 | 1.73E+07 | NA       | NA       | NA       | NA       |
| 116 | NA       | NA       | 7.53E+09 | 7.42E+09 | 1.50E+07 | 1.96E+07 | NA       | NA       | NA       | NA       |
| 117 | 3.57E+07 | 0.00E+00 | 7.30E+09 | 7.40E+09 | 5.10E+06 | 1.14E+07 | 4.89E-03 | 7.00E+00 | 0.00E+00 | 0.00E+00 |
| 118 | 2.64E+07 | 2.07E+07 | 7.39E+09 | 7.16E+09 | 2.90E+07 | 2.79E+07 | 3.57E-03 | 9.09E-01 | 2.89E-03 | 7.43E-01 |
| 119 | 4.26E+05 | 0.00E+00 | 7.13E+09 | 6.91E+09 | 1.08E+07 | 7.92E+06 | 5.97E-05 | 3.96E-02 | 0.00E+00 | 0.00E+00 |
| 120 | 1.31E+06 | 0.00E+00 | 6.92E+09 | 7.08E+09 | 1.68E+07 | 1.59E+07 | 1.90E-04 | 7.82E-02 | 0.00E+00 | 0.00E+00 |
| 121 | NA       | NA       | 6.85E+09 | 7.07E+09 | 5.03E+07 | 1.99E+07 | NA       | NA       | NA       | NA       |
| 122 | 0.00E+00 | 1.13E+06 | 6.22E+09 | 7.65E+09 | 3.16E+07 | 5.00E+07 | 0.00E+00 | 0.00E+00 | 1.48E-04 | 2.26E-02 |
| 123 | NA       | NA       | 6.82E+09 | 7.01E+09 | 3.16E+07 | 4.08E+07 | NA       | NA       | NA       | NA       |
| 124 | 2.07E+06 | 0.00E+00 | 7.50E+09 | 6.30E+09 | 1.58E+07 | 1.65E+07 | 2.76E-04 | 1.32E-01 | 0.00E+00 | 0.00E+00 |
| 125 | 1.55E+05 | 4.30E+07 | 7.37E+09 | 6.36E+09 | 1.71E+07 | 9.17E+06 | 2.11E-05 | 9.08E-03 | 6.77E-03 | 4.69E+00 |
| 126 | 5.18E+05 | 0.00E+00 | 7.16E+09 | 6.39E+09 | 1.63E+07 | 1.36E+07 | 7.23E-05 | 3.18E-02 | 0.00E+00 | 0.00E+00 |
| 127 | 2.76E+06 | 0.00E+00 | 6.74E+09 | 6.60E+09 | 2.28E+07 | 1.90E+07 | 4.09E-04 | 1.21E-01 | 0.00E+00 | 0.00E+00 |
| 128 | 1.88E+07 | 4.31E+05 | 6.32E+09 | 7.04E+09 | 1.48E+07 | 1.11E+07 | 2.97E-03 | 1.26E+00 | 6.13E-05 | 3.87E-02 |
| 129 | 1.88E+07 | 4.31E+05 | 6.32E+09 | 7.04E+09 | 1.48E+07 | 1.11E+07 | 2.97E-03 | 1.26E+00 | 6.13E-05 | 3.87E-02 |
| 130 | NA       | NA       | 6.67E+09 | 6.62E+09 | 9.00E+06 | 1.19E+07 | NA       | NA       | NA       | NA       |
| 131 | NA       | NA       | 5.94E+09 | 7.19E+09 | 2.54E+07 | 2.34E+07 | NA       | NA       | NA       | NA       |
| 132 | NA       | NA       | 6.62E+09 | 6.42E+09 | 2.11E+07 | 2.02E+07 | NA       | NA       | NA       | NA       |
| 133 | NA       | NA       | 6.59E+09 | 6.15E+09 | 2.40E+07 | 3.12E+07 | NA       | NA       | NA       | NA       |
| 134 | NA       | NA       | 6.26E+09 | 6.33E+09 | 1.50E+07 | 1.48E+07 | NA       | NA       | NA       | NA       |
| 135 | NA       | NA       | 5.39E+09 | 7.04E+09 | 7.41E+06 | 6.07E+06 | NA       | NA       | NA       | NA       |
| 136 | NA       | NA       | 6.90E+09 | 5.47E+09 | 1.74E+07 | 1.20E+07 | NA       | NA       | NA       | NA       |
| 137 | 0.00E+00 | 0.00E+00 | 5.86E+09 | 6.44E+09 | 1.20E+07 | 2.04E+07 | 0.00E+00 | 0.00E+00 | 0.00E+00 | 0.00E+00 |
| 138 | NA       | NA       | 6.08E+09 | 5.99E+09 | 4.43E+07 | 2.51E+07 | NA       | NA       | NA       | NA       |
| 139 | NA       | NA       | 5.71E+09 | 6.28E+09 | 2.69E+07 | 3.14E+07 | NA       | NA       | NA       | NA       |
| 140 | 0.00E+00 | 1.30E+05 | 5.95E+09 | 5.97E+09 | 1.85E+07 | 2.33E+07 | 0.00E+00 | 0.00E+00 | 2.18E-05 | 5.59E-03 |
| 141 | NA       | NA       | 6.23E+09 | 5.70E+09 | 1.06E+07 | 1.30E+07 | NA       | NA       | NA       | NA       |
| 142 | 0.00E+00 | 1.15E+07 | 5.18E+09 | 6.60E+09 | 2.66E+07 | 2.79E+07 | 0.00E+00 | 0.00E+00 | 1.75E-03 | 4.15E-01 |
| 143 | NA       | NA       | 5.90E+09 | 5.83E+09 | 2.57E+07 | 5.16E+07 | NA       | NA       | NA       | NA       |
| 144 | NA       | NA       | 5.71E+09 | 6.03E+09 | 1.54E+07 | 9.13E+06 | NA       | NA       | NA       | NA       |
| 145 | NA       | NA       | 6.14E+09 | 5.36E+09 | 4.09E+07 | 1.87E+07 | NA       | NA       | NA       | NA       |
| 146 | NA       | NA       | 6.07E+09 | 5.41E+09 | 7.47E+06 | 7.37E+06 | NA       | NA       | NA       | NA       |
| 147 | 0.00E+00 | 3.35E+06 | 5.37E+09 | 6.06E+09 | 1.57E+07 | 1.35E+07 | 0.00E+00 | 0.00E+00 | 5.53E-04 | 2.49E-01 |
| 148 | 8.59E+06 | 0.00E+00 | 5.88E+09 | 5.53E+09 | 5.08E+06 | 7.82E+06 | 1.46E-03 | 1.69E+00 | 0.00E+00 | 0.00E+00 |

|     |          |          |          |          |          |          |          |          |          |          |
|-----|----------|----------|----------|----------|----------|----------|----------|----------|----------|----------|
| 149 | 2.01E+07 | 7.16E+05 | 5.71E+09 | 5.68E+09 | 1.15E+07 | 8.96E+06 | 3.52E-03 | 1.75E+00 | 1.26E-04 | 7.99E-02 |
| 150 | 2.68E+06 | 0.00E+00 | 5.56E+09 | 5.79E+09 | 1.60E+07 | 1.33E+07 | 4.82E-04 | 1.67E-01 | 0.00E+00 | 0.00E+00 |
| 151 | 2.39E+07 | 3.69E+06 | 5.66E+09 | 5.55E+09 | 1.55E+07 | 1.25E+07 | 4.23E-03 | 1.54E+00 | 6.65E-04 | 2.96E-01 |
| 152 | NA       | NA       | 5.72E+09 | 5.48E+09 | 2.30E+07 | 9.26E+06 | NA       | NA       | NA       | NA       |
| 153 | 2.15E+06 | 1.40E+05 | 5.41E+09 | 5.73E+09 | 2.14E+07 | 1.44E+07 | 3.98E-04 | 1.01E-01 | 2.45E-05 | 9.77E-03 |
| 154 | 4.55E+06 | 1.74E+05 | 5.71E+09 | 5.45E+09 | 8.61E+06 | 8.17E+06 | 7.96E-04 | 5.29E-01 | 3.20E-05 | 2.13E-02 |
| 155 | NA       | NA       | 6.04E+09 | 5.05E+09 | 1.13E+07 | 5.41E+06 | NA       | NA       | NA       | NA       |
| 156 | 8.33E+07 | 0.00E+00 | 5.51E+09 | 5.53E+09 | 2.17E+07 | 2.92E+07 | 1.51E-02 | 3.84E+00 | 0.00E+00 | 0.00E+00 |
| 157 | 0.00E+00 | 4.97E+06 | 5.18E+09 | 5.84E+09 | 1.63E+07 | 1.38E+07 | 0.00E+00 | 0.00E+00 | 8.51E-04 | 3.59E-01 |
| 158 | 5.38E+06 | 0.00E+00 | 5.20E+09 | 5.42E+09 | 3.69E+07 | 4.97E+07 | 1.03E-03 | 1.46E-01 | 0.00E+00 | 0.00E+00 |
| 159 | 1.25E+07 | 3.94E+06 | 5.43E+09 | 5.21E+09 | 9.14E+06 | 1.63E+07 | 2.30E-03 | 1.37E+00 | 7.57E-04 | 2.42E-01 |
| 160 | 0.00E+00 | 4.51E+06 | 5.49E+09 | 5.04E+09 | 4.43E+07 | 2.53E+07 | 0.00E+00 | 0.00E+00 | 8.94E-04 | 1.78E-01 |
| 161 | NA       | NA       | 5.17E+09 | 5.33E+09 | 5.10E+06 | 8.27E+06 | NA       | NA       | NA       | NA       |
| 162 | NA       | NA       | 4.53E+09 | 5.86E+09 | 2.71E+07 | 2.47E+07 | NA       | NA       | NA       | NA       |
| 163 | NA       | NA       | 5.49E+09 | 4.88E+09 | 1.84E+07 | 2.00E+07 | NA       | NA       | NA       | NA       |
| 164 | NA       | NA       | 5.61E+09 | 4.66E+09 | 1.00E+07 | 1.03E+07 | NA       | NA       | NA       | NA       |
| 165 | NA       | NA       | 5.27E+09 | 4.98E+09 | 5.85E+06 | 8.59E+06 | NA       | NA       | NA       | NA       |
| 166 | NA       | NA       | 4.49E+09 | 5.67E+09 | 1.79E+07 | 8.53E+06 | NA       | NA       | NA       | NA       |
| 167 | 2.22E+06 | 0.00E+00 | 5.13E+09 | 5.04E+09 | 8.47E+06 | 7.29E+06 | 4.32E-04 | 2.62E-01 | 0.00E+00 | 0.00E+00 |
| 168 | NA       | NA       | 5.94E+09 | 4.09E+09 | 5.17E+06 | 2.80E+07 | NA       | NA       | NA       | NA       |
| 169 | 0.00E+00 | 1.71E+06 | 4.80E+09 | 5.12E+09 | 3.55E+07 | 4.19E+07 | 0.00E+00 | 0.00E+00 | 3.34E-04 | 4.08E-02 |
| 170 | 0.00E+00 | 0.00E+00 | 5.07E+09 | 4.87E+09 | 2.08E+07 | 2.46E+07 | 0.00E+00 | 0.00E+00 | 0.00E+00 | 0.00E+00 |
| 171 | 0.00E+00 | 3.81E+05 | 4.33E+09 | 5.65E+09 | 2.97E+06 | 3.46E+06 | 0.00E+00 | 0.00E+00 | 6.76E-05 | 1.10E-01 |
| 172 | 2.73E+06 | 0.00E+00 | 4.44E+09 | 5.44E+09 | 1.27E+07 | 1.17E+07 | 6.14E-04 | 2.15E-01 | 0.00E+00 | 0.00E+00 |
| 173 | NA       | NA       | 5.05E+09 | 4.81E+09 | 1.72E+07 | 1.39E+07 | NA       | NA       | NA       | NA       |
| 174 | NA       | NA       | 5.27E+09 | 4.31E+09 | 1.65E+07 | 1.77E+07 | NA       | NA       | NA       | NA       |
| 175 | NA       | NA       | 5.08E+09 | 4.45E+09 | 1.02E+07 | 6.45E+06 | NA       | NA       | NA       | NA       |
| 176 | NA       | NA       | 4.76E+09 | 4.69E+09 | 4.84E+07 | 2.86E+07 | NA       | NA       | NA       | NA       |
| 177 | 0.00E+00 | 0.00E+00 | 5.02E+09 | 4.46E+09 | 2.68E+07 | 1.84E+07 | 0.00E+00 | 0.00E+00 | 0.00E+00 | 0.00E+00 |
| 178 | NA       | NA       | 4.92E+09 | 4.42E+09 | 6.10E+07 | 6.96E+07 | NA       | NA       | NA       | NA       |
| 179 | NA       | NA       | 4.57E+09 | 4.86E+09 | 2.94E+07 | 1.13E+07 | NA       | NA       | NA       | NA       |
| 180 | NA       | NA       | 4.14E+09 | 5.30E+09 | 1.21E+07 | 1.10E+07 | NA       | NA       | NA       | NA       |
| 181 | 1.96E+07 | 4.93E+05 | 4.74E+09 | 4.70E+09 | 8.75E+06 | 1.31E+07 | 4.13E-03 | 2.24E+00 | 1.05E-04 | 3.78E-02 |
| 182 | 0.00E+00 | 1.14E+07 | 5.08E+09 | 4.34E+09 | 2.09E+07 | 1.23E+07 | 0.00E+00 | 0.00E+00 | 2.62E-03 | 9.28E-01 |
| 183 | NA       | NA       | 4.88E+09 | 4.46E+09 | 8.59E+06 | 9.55E+06 | NA       | NA       | NA       | NA       |
| 184 | NA       | NA       | 4.15E+09 | 5.11E+09 | 1.87E+07 | 1.61E+07 | NA       | NA       | NA       | NA       |
| 185 | NA       | NA       | 4.85E+09 | 4.35E+09 | 1.48E+07 | 1.23E+07 | NA       | NA       | NA       | NA       |
| 186 | NA       | NA       | 4.90E+09 | 4.25E+09 | 8.50E+06 | 2.91E+07 | NA       | NA       | NA       | NA       |

|     |          |          |          |          |          |          |          |          |          |          |
|-----|----------|----------|----------|----------|----------|----------|----------|----------|----------|----------|
| 187 | NA       | NA       | 4.54E+09 | 4.64E+09 | 3.86E+06 | 4.96E+06 | NA       | NA       | NA       | NA       |
| 188 | NA       | NA       | 4.85E+09 | 4.28E+09 | 1.76E+07 | 1.72E+07 | NA       | NA       | NA       | NA       |
| 189 | NA       | NA       | 4.12E+09 | 4.98E+09 | 1.58E+07 | 2.33E+07 | NA       | NA       | NA       | NA       |
| 190 | 6.06E+05 | 0.00E+00 | 4.57E+09 | 4.43E+09 | 1.25E+07 | 1.15E+07 | 1.33E-04 | 4.84E-02 | 0.00E+00 | 0.00E+00 |
| 191 | NA       | NA       | 3.76E+09 | 5.19E+09 | 2.51E+07 | 2.50E+07 | NA       | NA       | NA       | NA       |
| 192 | NA       | NA       | 4.18E+09 | 4.72E+09 | 1.57E+07 | 1.44E+07 | NA       | NA       | NA       | NA       |
| 193 | 1.41E+07 | 0.00E+00 | 4.61E+09 | 4.28E+09 | 8.97E+06 | 5.65E+06 | 3.05E-03 | 1.57E+00 | 0.00E+00 | 0.00E+00 |
| 194 | NA       | NA       | 4.53E+09 | 4.25E+09 | 4.43E+07 | 2.48E+07 | NA       | NA       | NA       | NA       |
| 195 | 3.31E+06 | 0.00E+00 | 4.79E+09 | 3.97E+09 | 2.58E+07 | 2.07E+07 | 6.92E-04 | 1.28E-01 | 0.00E+00 | 0.00E+00 |
| 196 | NA       | NA       | 4.26E+09 | 4.45E+09 | 7.52E+06 | 2.88E+06 | NA       | NA       | NA       | NA       |
| 197 | NA       | NA       | 4.27E+09 | 4.41E+09 | 1.39E+07 | 1.80E+07 | NA       | NA       | NA       | NA       |
| 198 | NA       | NA       | 4.44E+09 | 4.18E+09 | 8.14E+06 | 9.81E+06 | NA       | NA       | NA       | NA       |
| 199 | 1.97E+07 | 3.12E+07 | 4.36E+09 | 4.24E+09 | 1.97E+07 | 1.19E+07 | 4.53E-03 | 1.00E+00 | 7.37E-03 | 2.62E+00 |
| 200 | NA       | NA       | 4.31E+09 | 4.20E+09 | 4.03E+07 | 3.10E+07 | NA       | NA       | NA       | NA       |
| 201 | NA       | NA       | 4.13E+09 | 4.31E+09 | 1.12E+07 | 2.99E+07 | NA       | NA       | NA       | NA       |
| 202 | NA       | NA       | 4.55E+09 | 3.86E+09 | 1.94E+07 | 7.56E+06 | NA       | NA       | NA       | NA       |
| 203 | NA       | NA       | 4.56E+09 | 3.78E+09 | 1.41E+07 | 2.09E+07 | NA       | NA       | NA       | NA       |
| 204 | 7.29E+06 | 0.00E+00 | 4.65E+09 | 3.66E+09 | 1.05E+07 | 1.66E+07 | 1.57E-03 | 6.93E-01 | 0.00E+00 | 0.00E+00 |
| 205 | NA       | NA       | 3.57E+09 | 4.68E+09 | 1.65E+07 | 1.23E+07 | NA       | NA       | NA       | NA       |
| 206 | 2.83E+06 | 0.00E+00 | 4.02E+09 | 4.21E+09 | 1.34E+07 | 1.46E+07 | 7.04E-04 | 2.11E-01 | 0.00E+00 | 0.00E+00 |
| 207 | NA       | NA       | 3.84E+09 | 4.39E+09 | 1.17E+07 | 1.62E+07 | NA       | NA       | NA       | NA       |
| 208 | 0.00E+00 | 5.98E+06 | 4.29E+09 | 3.88E+09 | 7.06E+06 | 6.85E+06 | 0.00E+00 | 0.00E+00 | 1.54E-03 | 8.73E-01 |
| 209 | NA       | NA       | 4.22E+09 | 3.92E+09 | 9.82E+06 | 7.75E+06 | NA       | NA       | NA       | NA       |
| 210 | NA       | NA       | 4.49E+09 | 3.55E+09 | 2.24E+07 | 1.16E+07 | NA       | NA       | NA       | NA       |
| 211 | NA       | NA       | 2.64E+09 | 5.26E+09 | 3.21E+07 | 3.51E+07 | NA       | NA       | NA       | NA       |
| 212 | NA       | NA       | 3.85E+09 | 4.10E+09 | 6.32E+06 | 5.52E+06 | NA       | NA       | NA       | NA       |
| 213 | NA       | NA       | 4.38E+09 | 3.57E+09 | NA       | NA       | NA       | NA       | NA       | NA       |
| 214 | NA       | NA       | 3.52E+09 | 4.36E+09 | 2.75E+07 | 2.87E+07 | NA       | NA       | NA       | NA       |
| 215 | NA       | NA       | 4.18E+09 | 3.74E+09 | 9.98E+06 | 7.75E+06 | NA       | NA       | NA       | NA       |
| 216 | 2.21E+06 | 1.26E+06 | 4.29E+09 | 3.50E+09 | 1.76E+07 | 1.88E+07 | 5.14E-04 | 1.25E-01 | 3.59E-04 | 6.68E-02 |
| 217 | NA       | NA       | 4.01E+09 | 3.77E+09 | 5.38E+06 | 4.20E+06 | NA       | NA       | NA       | NA       |
| 218 | 1.09E+07 | 4.83E+06 | 3.73E+09 | 3.98E+09 | 1.99E+07 | 2.44E+07 | 2.91E-03 | 5.46E-01 | 1.21E-03 | 1.98E-01 |
| 219 | NA       | NA       | 3.97E+09 | 3.74E+09 | 2.22E+07 | 1.38E+07 | NA       | NA       | NA       | NA       |
| 220 | 7.88E+05 | 0.00E+00 | 3.73E+09 | 3.97E+09 | 9.42E+06 | 9.11E+06 | 2.11E-04 | 8.37E-02 | 0.00E+00 | 0.00E+00 |
| 221 | NA       | NA       | 3.25E+09 | 4.41E+09 | 2.18E+07 | 2.06E+07 | NA       | NA       | NA       | NA       |
| 222 | 0.00E+00 | 5.59E+06 | 3.84E+09 | 3.80E+09 | 1.21E+07 | 4.79E+06 | 0.00E+00 | 0.00E+00 | 1.47E-03 | 1.17E+00 |
| 223 | NA       | NA       | 3.92E+09 | 3.69E+09 | 5.56E+06 | 6.09E+06 | NA       | NA       | NA       | NA       |
| 224 | NA       | NA       | 3.78E+09 | 3.76E+09 | 6.21E+06 | 9.68E+06 | NA       | NA       | NA       | NA       |

|     |          |          |          |          |          |          |          |          |          |          |
|-----|----------|----------|----------|----------|----------|----------|----------|----------|----------|----------|
| 225 | NA       | NA       | 3.86E+09 | 3.61E+09 | 1.21E+07 | 3.66E+06 | NA       | NA       | NA       | NA       |
| 226 | NA       | NA       | 4.07E+09 | 3.36E+09 | 6.62E+06 | 8.27E+06 | NA       | NA       | NA       | NA       |
| 227 | 0.00E+00 | 5.22E+06 | 3.57E+09 | 3.76E+09 | 1.02E+07 | 9.08E+07 | 0.00E+00 | 0.00E+00 | 1.39E-03 | 5.75E-02 |
| 228 | 2.23E+06 | 0.00E+00 | 3.71E+09 | 3.66E+09 | 1.97E+07 | 8.74E+06 | 6.02E-04 | 1.14E-01 | 0.00E+00 | 0.00E+00 |
| 229 | NA       | NA       | 3.84E+09 | 3.45E+09 | 6.67E+06 | 5.79E+06 | NA       | NA       | NA       | NA       |
| 230 | NA       | NA       | NA       | NA       | 3.45E+09 | 3.82E+09 | NA       | NA       | NA       | NA       |
| 231 | 3.00E+05 | 7.47E+05 | 3.82E+09 | 3.39E+09 | 8.24E+06 | 2.60E+06 | 7.83E-05 | 3.63E-02 | 2.21E-04 | 2.87E-01 |
| 232 | NA       | NA       | 3.71E+09 | 3.50E+09 | 4.05E+06 | 6.15E+06 | NA       | NA       | NA       | NA       |
| 233 | NA       | NA       | 3.86E+09 | 3.34E+09 | 1.45E+07 | 4.51E+06 | NA       | NA       | NA       | NA       |
| 234 | NA       | NA       | 3.67E+09 | 3.48E+09 | 5.23E+06 | 9.31E+06 | NA       | NA       | NA       | NA       |
| 235 | NA       | NA       | 4.09E+09 | 3.04E+09 | 1.01E+07 | 1.72E+07 | NA       | NA       | NA       | NA       |
| 236 | NA       | NA       | 3.59E+09 | 3.48E+09 | 4.43E+07 | 2.41E+07 | NA       | NA       | NA       | NA       |
| 237 | NA       | NA       | 3.88E+09 | 3.17E+09 | 9.02E+06 | 1.36E+07 | NA       | NA       | NA       | NA       |
| 238 | NA       | NA       | 3.52E+09 | 3.52E+09 | 1.37E+07 | 8.00E+06 | NA       | NA       | NA       | NA       |
| 239 | NA       | NA       | 3.27E+09 | 3.64E+09 | 1.19E+07 | 1.35E+07 | NA       | NA       | NA       | NA       |
| 240 | 0.00E+00 | 0.00E+00 | 3.08E+09 | 3.84E+09 | 1.33E+07 | 6.58E+06 | 0.00E+00 | 0.00E+00 | 0.00E+00 | 0.00E+00 |
| 241 | NA       | NA       | 3.49E+09 | 3.38E+09 | 4.43E+07 | 2.39E+07 | NA       | NA       | NA       | NA       |
| 242 | 1.35E+06 | 0.00E+00 | 3.76E+09 | 3.12E+09 | 5.03E+06 | 7.58E+06 | 3.60E-04 | 2.69E-01 | 0.00E+00 | 0.00E+00 |
| 243 | NA       | NA       | 3.83E+09 | 2.91E+09 | 1.19E+07 | 1.91E+07 | NA       | NA       | NA       | NA       |
| 244 | 5.42E+06 | 0.00E+00 | 3.29E+09 | 3.39E+09 | 2.74E+07 | 1.24E+07 | 1.65E-03 | 1.98E-01 | 0.00E+00 | 0.00E+00 |
| 245 | NA       | NA       | 3.58E+09 | 2.98E+09 | 1.04E+07 | 5.86E+06 | NA       | NA       | NA       | NA       |
| 246 | 5.25E+06 | 1.35E+05 | 3.34E+09 | 3.10E+09 | 9.05E+06 | 3.97E+06 | 1.57E-03 | 5.80E-01 | 4.34E-05 | 3.39E-02 |
| 247 | 3.80E+07 | 0.00E+00 | 3.15E+09 | 3.26E+09 | 1.93E+07 | 1.99E+07 | 1.20E-02 | 1.96E+00 | 0.00E+00 | 0.00E+00 |
| 248 | 9.41E+06 | 0.00E+00 | 3.05E+09 | 3.35E+09 | 4.06E+06 | 3.42E+06 | 3.08E-03 | 2.32E+00 | 0.00E+00 | 0.00E+00 |
| 249 | NA       | NA       | 3.13E+09 | 3.19E+09 | 1.92E+07 | 1.01E+07 | NA       | NA       | NA       | NA       |
| 250 | 1.58E+06 | 0.00E+00 | 3.16E+09 | 3.01E+09 | 7.69E+06 | 9.29E+06 | 5.01E-04 | 2.06E-01 | 0.00E+00 | 0.00E+00 |
| 251 | 9.29E+06 | 0.00E+00 | 2.88E+09 | 3.17E+09 | 6.51E+06 | 6.74E+06 | 3.23E-03 | 1.43E+00 | 0.00E+00 | 0.00E+00 |
| 252 | NA       | NA       | 2.80E+09 | 3.22E+09 | 3.49E+06 | 1.66E+06 | NA       | NA       | NA       | NA       |
| 253 | NA       | NA       | 2.77E+09 | 3.23E+09 | 4.19E+06 | 3.38E+06 | NA       | NA       | NA       | NA       |
| 254 | NA       | NA       | 3.49E+09 | 2.46E+09 | 7.49E+06 | 1.40E+07 | NA       | NA       | NA       | NA       |
| 255 | NA       | NA       | 2.83E+09 | 3.11E+09 | 1.36E+07 | 2.09E+06 | NA       | NA       | NA       | NA       |
| 256 | NA       | NA       | 2.83E+09 | 3.11E+09 | 1.36E+07 | 2.09E+06 | NA       | NA       | NA       | NA       |
| 257 | 0.00E+00 | 1.38E+06 | 2.99E+09 | 2.89E+09 | 1.18E+07 | 1.73E+07 | 0.00E+00 | 0.00E+00 | 4.77E-04 | 7.99E-02 |
| 258 | NA       | NA       | 2.95E+09 | 2.88E+09 | 1.47E+07 | 9.07E+06 | NA       | NA       | NA       | NA       |
| 259 | 6.87E+07 | 3.82E+06 | 2.84E+09 | 2.98E+09 | 4.94E+06 | 7.30E+06 | 2.42E-02 | 1.39E+01 | 1.28E-03 | 5.24E-01 |
| 260 | 0.00E+00 | 3.27E+06 | 3.07E+09 | 2.71E+09 | 8.79E+06 | 9.68E+06 | 0.00E+00 | 0.00E+00 | 1.21E-03 | 3.38E-01 |
| 261 | 1.42E+05 | 1.61E+05 | 3.14E+09 | 2.63E+09 | 4.62E+06 | 2.35E+06 | 4.51E-05 | 3.06E-02 | 6.11E-05 | 6.83E-02 |
| 262 | NA       | NA       | 2.93E+09 | 2.79E+09 | 4.50E+06 | 5.55E+06 | NA       | NA       | NA       | NA       |

|     |          |          |          |          |          |          |          |          |          |          |
|-----|----------|----------|----------|----------|----------|----------|----------|----------|----------|----------|
| 263 | 0.00E+00 | 2.57E+06 | 3.06E+09 | 2.64E+09 | 3.55E+06 | 3.36E+06 | 0.00E+00 | 0.00E+00 | 9.76E-04 | 7.66E-01 |
| 264 | NA       | NA       | 2.89E+09 | 2.73E+09 | 1.05E+07 | 4.96E+06 | NA       | NA       | NA       | NA       |
| 265 | NA       | NA       | 2.96E+09 | 2.67E+09 | 4.86E+06 | 3.75E+06 | NA       | NA       | NA       | NA       |
| 266 | 8.16E+05 | 0.00E+00 | 2.85E+09 | 2.76E+09 | 2.67E+06 | 4.11E+06 | 2.86E-04 | 3.06E-01 | 0.00E+00 | 0.00E+00 |
| 267 | NA       | NA       | 3.31E+09 | 2.28E+09 | 8.85E+06 | 5.33E+06 | NA       | NA       | NA       | NA       |
| 268 | NA       | NA       | 2.75E+09 | 2.83E+09 | 1.10E+07 | 9.35E+06 | NA       | NA       | NA       | NA       |
| 269 | 6.09E+06 | 0.00E+00 | 2.80E+09 | 2.78E+09 | 5.69E+06 | 3.85E+06 | 2.17E-03 | 1.07E+00 | 0.00E+00 | 0.00E+00 |
| 270 | NA       | NA       | 2.80E+09 | 2.78E+09 | 3.15E+06 | 3.69E+06 | NA       | NA       | NA       | NA       |
| 271 | 0.00E+00 | 0.00E+00 | 1.92E+09 | 3.53E+09 | 2.93E+07 | 4.26E+07 | 0.00E+00 | 0.00E+00 | 0.00E+00 | 0.00E+00 |
| 272 | NA       | NA       | 2.47E+09 | 3.03E+09 | 1.05E+07 | 3.92E+06 | NA       | NA       | NA       | NA       |
| 273 | 9.67E+04 | 0.00E+00 | 2.57E+09 | 2.85E+09 | 1.80E+07 | 3.83E+06 | 3.77E-05 | 5.38E-03 | 0.00E+00 | 0.00E+00 |
| 274 | 4.37E+07 | 3.02E+06 | 3.06E+09 | 2.29E+09 | 2.21E+07 | 2.49E+07 | 1.43E-02 | 1.98E+00 | 1.32E-03 | 1.21E-01 |
| 275 | NA       | NA       | 2.77E+09 | 2.55E+09 | 6.36E+06 | 4.73E+06 | NA       | NA       | NA       | NA       |
| 276 | NA       | NA       | 2.58E+09 | 2.65E+09 | 1.17E+07 | 1.73E+07 | NA       | NA       | NA       | NA       |
| 277 | NA       | NA       | 2.78E+09 | 2.46E+09 | 3.50E+06 | 5.51E+06 | NA       | NA       | NA       | NA       |
| 278 | NA       | NA       | 2.64E+09 | 2.59E+09 | 6.94E+06 | 3.04E+06 | NA       | NA       | NA       | NA       |
| 279 | NA       | NA       | 2.70E+09 | 2.51E+09 | 2.85E+06 | 3.61E+06 | NA       | NA       | NA       | NA       |
| 280 | NA       | NA       | 2.77E+09 | 2.39E+09 | 3.52E+06 | 4.06E+06 | NA       | NA       | NA       | NA       |
| 281 | 4.16E+06 | 1.28E+05 | 2.50E+09 | 2.64E+09 | 1.38E+07 | 9.25E+06 | 1.66E-03 | 3.02E-01 | 4.85E-05 | 1.38E-02 |
| 282 | NA       | NA       | 2.56E+09 | 2.57E+09 | 8.74E+06 | 1.09E+07 | NA       | NA       | NA       | NA       |
| 283 | NA       | NA       | 2.89E+09 | 2.22E+09 | 7.95E+06 | 1.09E+07 | NA       | NA       | NA       | NA       |
| 284 | NA       | NA       | 2.62E+09 | 2.39E+09 | 4.76E+06 | 3.22E+06 | NA       | NA       | NA       | NA       |
| 285 | NA       | NA       | 2.49E+09 | 2.50E+09 | 1.42E+07 | 9.51E+06 | NA       | NA       | NA       | NA       |
| 286 | 0.00E+00 | 1.95E+09 | 3.37E+09 | 1.64E+09 | 1.12E+05 | 0.00E+00 | 0.00E+00 | 0.00E+00 | 1.19E+00 | Inf      |
| 287 | NA       | NA       | 2.82E+09 | 2.17E+09 | 3.80E+06 | 6.14E+06 | NA       | NA       | NA       | NA       |
| 288 | NA       | NA       | 2.64E+09 | 2.34E+09 | 5.33E+06 | 3.56E+06 | NA       | NA       | NA       | NA       |
| 289 | 2.05E+05 | 0.00E+00 | 2.13E+09 | 2.82E+09 | 1.26E+07 | 1.47E+07 | 9.61E-05 | 1.62E-02 | 0.00E+00 | 0.00E+00 |
| 290 | NA       | NA       | 2.37E+09 | 2.56E+09 | 1.11E+07 | 5.86E+06 | NA       | NA       | NA       | NA       |
| 291 | 3.46E+07 | 5.87E+05 | 2.24E+09 | 2.67E+09 | 2.14E+07 | 1.23E+07 | 1.55E-02 | 1.62E+00 | 2.20E-04 | 4.79E-02 |
| 292 | NA       | NA       | 2.53E+09 | 2.39E+09 | 5.83E+06 | 5.35E+06 | NA       | NA       | NA       | NA       |
| 293 | NA       | NA       | 2.61E+09 | 2.29E+09 | 6.60E+06 | 4.32E+06 | NA       | NA       | NA       | NA       |
| 294 | NA       | NA       | 2.27E+09 | 2.62E+09 | 4.42E+06 | 3.96E+06 | NA       | NA       | NA       | NA       |
| 295 | 2.49E+08 | 1.57E+08 | 2.17E+09 | 2.63E+09 | 3.32E+07 | 3.47E+07 | 1.15E-01 | 7.50E+00 | 5.98E-02 | 4.54E+00 |
| 296 | 3.26E+05 | 0.00E+00 | 2.61E+09 | 2.14E+09 | 1.08E+07 | 5.13E+06 | 1.25E-04 | 3.01E-02 | 0.00E+00 | 0.00E+00 |
| 297 | NA       | NA       | 2.39E+09 | 2.36E+09 | 3.78E+06 | 4.00E+06 | NA       | NA       | NA       | NA       |
| 298 | NA       | NA       | 2.26E+09 | 2.48E+09 | 7.51E+06 | 3.25E+06 | NA       | NA       | NA       | NA       |
| 299 | NA       | NA       | 2.33E+09 | 2.36E+09 | 2.87E+07 | 1.38E+07 | NA       | NA       | NA       | NA       |
| 300 | NA       | NA       | 2.49E+09 | 2.22E+09 | 1.40E+07 | 5.31E+06 | NA       | NA       | NA       | NA       |



|     |          |          |          |          |          |          |          |          |          |          |
|-----|----------|----------|----------|----------|----------|----------|----------|----------|----------|----------|
| 301 | NA       | NA       | 2.49E+09 | 2.13E+09 | 2.51E+06 | 3.94E+06 | NA       | NA       | NA       | NA       |
| 302 | NA       | NA       | 2.40E+09 | 2.19E+09 | 3.07E+06 | 2.74E+06 | NA       | NA       | NA       | NA       |
| 303 | NA       | NA       | 2.55E+09 | 2.01E+09 | 6.43E+06 | 7.18E+06 | NA       | NA       | NA       | NA       |
| 304 | 5.18E+06 | 0.00E+00 | 2.40E+09 | 2.13E+09 | 6.33E+06 | 4.72E+06 | 2.16E-03 | 8.18E-01 | 0.00E+00 | 0.00E+00 |
| 305 | 1.97E+06 | 2.94E+06 | 2.26E+09 | 2.22E+09 | 2.04E+07 | 4.24E+06 | 8.71E-04 | 9.66E-02 | 1.32E-03 | 6.93E-01 |
| 306 | NA       | NA       | 2.40E+09 | 2.09E+09 | 5.08E+06 | 4.19E+06 | NA       | NA       | NA       | NA       |
| 307 | NA       | NA       | 2.23E+09 | 2.24E+09 | 7.52E+06 | 6.72E+05 | NA       | NA       | NA       | NA       |
| 308 | NA       | NA       | 2.07E+09 | 2.40E+09 | 3.75E+06 | 4.42E+06 | NA       | NA       | NA       | NA       |
| 309 | NA       | NA       | 2.15E+09 | 2.31E+09 | 7.74E+06 | 5.31E+06 | NA       | NA       | NA       | NA       |
| 310 | 4.75E+06 | 0.00E+00 | 2.08E+09 | 2.35E+09 | 5.74E+06 | 5.44E+06 | 2.28E-03 | 8.29E-01 | 0.00E+00 | 0.00E+00 |
| 311 | NA       | NA       | 2.16E+09 | 2.25E+09 | 4.15E+06 | 1.39E+06 | NA       | NA       | NA       | NA       |
| 312 | NA       | NA       | 2.41E+09 | 2.00E+09 | 5.73E+06 | 2.85E+06 | NA       | NA       | NA       | NA       |
| 313 | NA       | NA       | 2.16E+09 | 2.23E+09 | 2.95E+06 | 1.86E+06 | NA       | NA       | NA       | NA       |
| 314 | NA       | NA       | 2.30E+09 | 2.04E+09 | 7.48E+06 | 8.39E+06 | NA       | NA       | NA       | NA       |
| 315 | NA       | NA       | 1.95E+09 | 2.37E+09 | 6.84E+06 | 2.43E+06 | NA       | NA       | NA       | NA       |
| 316 | NA       | NA       | 2.20E+09 | 2.09E+09 | 4.29E+05 | 6.46E+05 | NA       | NA       | NA       | NA       |
| 317 | NA       | NA       | 2.04E+09 | 2.22E+09 | 6.46E+06 | 3.08E+06 | NA       | NA       | NA       | NA       |
| 318 | NA       | NA       | 2.40E+09 | 1.86E+09 | 1.32E+06 | 2.57E+06 | NA       | NA       | NA       | NA       |
| 319 | NA       | NA       | 2.18E+09 | 2.04E+09 | 7.94E+06 | 7.18E+06 | NA       | NA       | NA       | NA       |
| 320 | NA       | NA       | 2.04E+09 | 2.16E+09 | 1.43E+06 | 2.45E+06 | NA       | NA       | NA       | NA       |
| 321 | NA       | NA       | 2.09E+09 | 2.07E+09 | 5.00E+06 | 3.19E+06 | NA       | NA       | NA       | NA       |
| 322 | NA       | NA       | 2.31E+09 | 1.82E+09 | 3.01E+06 | 2.55E+06 | NA       | NA       | NA       | NA       |
| 323 | NA       | NA       | 2.22E+09 | 1.86E+09 | 4.67E+06 | 8.63E+06 | NA       | NA       | NA       | NA       |
| 324 | 0.00E+00 | 4.67E+05 | 1.95E+09 | 2.02E+09 | 8.64E+06 | 8.97E+06 | 0.00E+00 | 0.00E+00 | 2.31E-04 | 5.20E-02 |
| 325 | 4.14E+05 | 0.00E+00 | 1.98E+09 | 1.99E+09 | 7.14E+06 | 8.34E+06 | 2.09E-04 | 5.80E-02 | 0.00E+00 | 0.00E+00 |
| 326 | NA       | NA       | 2.01E+09 | 1.94E+09 | 1.14E+07 | 7.66E+06 | NA       | NA       | NA       | NA       |
| 327 | 0.00E+00 | 1.66E+05 | 1.42E+09 | 2.53E+09 | 4.50E+06 | 1.44E+06 | 0.00E+00 | 0.00E+00 | 6.56E-05 | 1.15E-01 |
| 328 | 4.06E+06 | 0.00E+00 | 1.92E+09 | 2.02E+09 | 1.37E+07 | 3.87E+06 | 2.12E-03 | 2.97E-01 | 0.00E+00 | 0.00E+00 |
| 329 | NA       | NA       | 1.81E+09 | 2.11E+09 | 7.82E+06 | 6.40E+06 | NA       | NA       | NA       | NA       |
| 330 | NA       | NA       | 1.86E+09 | 2.04E+09 | 8.96E+06 | 6.20E+06 | NA       | NA       | NA       | NA       |
| 331 | NA       | NA       | 2.11E+09 | 1.80E+09 | 4.29E+06 | 3.67E+06 | NA       | NA       | NA       | NA       |
| 332 | 0.00E+00 | 0.00E+00 | 2.13E+09 | 1.77E+09 | 4.46E+06 | 4.47E+06 | 0.00E+00 | 0.00E+00 | 0.00E+00 | 0.00E+00 |
| 333 | 0.00E+00 | 6.82E+05 | 2.03E+09 | 1.86E+09 | 1.22E+07 | 4.85E+06 | 0.00E+00 | 0.00E+00 | 3.67E-04 | 1.41E-01 |
| 334 | NA       | NA       | 1.87E+09 | 1.98E+09 | 4.83E+06 | 5.41E+06 | NA       | NA       | NA       | NA       |
| 335 | 1.49E+07 | 6.78E+05 | 1.99E+09 | 1.78E+09 | 4.41E+06 | 4.18E+06 | 7.49E-03 | 3.38E+00 | 3.81E-04 | 1.62E-01 |
| 336 | NA       | NA       | 1.79E+09 | 1.95E+09 | 9.94E+06 | 1.40E+07 | NA       | NA       | NA       | NA       |
| 337 | NA       | NA       | 2.01E+09 | 1.74E+09 | 3.64E+06 | 2.73E+06 | NA       | NA       | NA       | NA       |
| 338 | 0.00E+00 | 6.13E+07 | 1.87E+09 | 1.86E+09 | 1.31E+07 | 1.14E+07 | 0.00E+00 | 0.00E+00 | 3.30E-02 | 5.37E+00 |

|     |          |          |          |          |          |          |          |          |          |          |
|-----|----------|----------|----------|----------|----------|----------|----------|----------|----------|----------|
| 339 | NA       | NA       | 1.96E+09 | 1.77E+09 | 1.20E+07 | 8.64E+06 | NA       | NA       | NA       | NA       |
| 340 | NA       | NA       | 1.95E+09 | 1.78E+09 | 2.48E+06 | 2.49E+06 | NA       | NA       | NA       | NA       |
| 341 | NA       | NA       | 1.98E+09 | 1.74E+09 | 2.77E+06 | 4.68E+06 | NA       | NA       | NA       | NA       |
| 342 | 1.70E+07 | 4.87E+05 | 2.02E+09 | 1.69E+09 | 5.08E+06 | 4.62E+06 | 8.43E-03 | 3.34E+00 | 2.89E-04 | 1.05E-01 |
| 343 | NA       | NA       | 1.98E+09 | 1.72E+09 | 2.81E+06 | 4.11E+06 | NA       | NA       | NA       | NA       |
| 344 | 6.08E+06 | 0.00E+00 | 1.79E+09 | 1.90E+09 | 6.38E+06 | 5.19E+06 | 3.40E-03 | 9.53E-01 | 0.00E+00 | 0.00E+00 |
| 345 | NA       | NA       | 1.94E+09 | 1.74E+09 | 7.35E+06 | 1.57E+07 | NA       | NA       | NA       | NA       |
| 346 | NA       | NA       | 2.03E+09 | 1.63E+09 | 8.87E+06 | 1.52E+07 | NA       | NA       | NA       | NA       |
| 347 | 6.10E+05 | 0.00E+00 | 1.78E+09 | 1.89E+09 | 3.84E+06 | 2.44E+06 | 3.42E-04 | 1.59E-01 | 0.00E+00 | 0.00E+00 |
| 348 | NA       | NA       | 1.91E+09 | 1.75E+09 | 3.59E+06 | 3.73E+06 | NA       | NA       | NA       | NA       |
| 349 | NA       | NA       | 1.88E+09 | 1.75E+09 | 4.75E+06 | 4.81E+06 | NA       | NA       | NA       | NA       |
| 350 | NA       | NA       | 2.08E+09 | 1.52E+09 | 3.01E+06 | 1.29E+06 | NA       | NA       | NA       | NA       |
| 351 | NA       | NA       | 1.57E+09 | 2.02E+09 | 2.84E+06 | 4.38E+06 | NA       | NA       | NA       | NA       |
| 352 | NA       | NA       | 1.79E+09 | 1.78E+09 | 2.44E+06 | 3.06E+06 | NA       | NA       | NA       | NA       |
| 353 | NA       | NA       | 1.94E+09 | 1.59E+09 | 2.81E+06 | 3.45E+06 | NA       | NA       | NA       | NA       |
| 354 | 7.96E+06 | 3.35E+05 | 1.53E+09 | 1.97E+09 | 5.44E+06 | 5.43E+06 | 5.19E-03 | 1.46E+00 | 1.70E-04 | 6.16E-02 |
| 355 | NA       | NA       | 1.73E+09 | 1.78E+09 | 3.12E+06 | 5.32E+06 | NA       | NA       | NA       | NA       |
| 356 | NA       | NA       | 1.45E+09 | 2.03E+09 | 1.01E+07 | 3.21E+06 | NA       | NA       | NA       | NA       |
| 357 | NA       | NA       | 1.82E+09 | 1.67E+09 | 2.10E+06 | 2.69E+06 | NA       | NA       | NA       | NA       |
| 358 | NA       | NA       | 1.70E+09 | 1.76E+09 | 1.82E+07 | 9.63E+06 | NA       | NA       | NA       | NA       |
| 359 | 3.18E+05 | 0.00E+00 | 1.73E+09 | 1.73E+09 | 2.91E+06 | 4.92E+06 | 1.84E-04 | 1.09E-01 | 0.00E+00 | 0.00E+00 |
| 360 | NA       | NA       | 1.72E+09 | 1.72E+09 | 7.40E+06 | 4.81E+06 | NA       | NA       | NA       | NA       |
| 361 | NA       | NA       | 1.58E+09 | 1.86E+09 | 7.08E+06 | 9.50E+06 | NA       | NA       | NA       | NA       |
| 362 | NA       | NA       | 1.63E+09 | 1.80E+09 | 7.67E+06 | 7.08E+06 | NA       | NA       | NA       | NA       |
| 363 | 1.26E+07 | 2.09E+07 | 2.12E+09 | 1.30E+09 | 2.09E+06 | 2.72E+06 | 5.96E-03 | 6.04E+00 | 1.61E-02 | 7.69E+00 |
| 364 | 1.26E+07 | 2.09E+07 | 2.12E+09 | 1.30E+09 | 2.09E+06 | 2.72E+06 | 5.96E-03 | 6.04E+00 | 1.61E-02 | 7.69E+00 |
| 365 | 0.00E+00 | 3.07E+06 | 1.79E+09 | 1.61E+09 | 7.95E+06 | 9.10E+06 | 0.00E+00 | 0.00E+00 | 1.90E-03 | 3.37E-01 |
| 366 | NA       | NA       | 1.58E+09 | 1.81E+09 | 1.13E+07 | 4.53E+06 | NA       | NA       | NA       | NA       |
| 367 | NA       | NA       | 1.72E+09 | 1.66E+09 | 6.94E+06 | 3.17E+06 | NA       | NA       | NA       | NA       |
| 368 | NA       | NA       | 1.64E+09 | 1.75E+09 | 2.09E+06 | 3.30E+06 | NA       | NA       | NA       | NA       |
| 369 | NA       | NA       | 1.50E+09 | 1.88E+09 | 2.73E+06 | 2.53E+06 | NA       | NA       | NA       | NA       |
| 370 | NA       | NA       | 1.78E+09 | 1.60E+09 | 3.52E+06 | 3.20E+06 | NA       | NA       | NA       | NA       |
| 371 | NA       | NA       | 1.82E+09 | 1.53E+09 | 5.15E+06 | 1.36E+06 | NA       | NA       | NA       | NA       |
| 372 | NA       | NA       | 1.50E+09 | 1.86E+09 | 1.51E+06 | 3.43E+06 | NA       | NA       | NA       | NA       |
| 373 | NA       | NA       | 1.42E+09 | 1.93E+09 | 6.33E+06 | 6.45E+06 | NA       | NA       | NA       | NA       |
| 374 | NA       | NA       | 1.72E+09 | 1.62E+09 | 1.00E+06 | 2.93E+06 | NA       | NA       | NA       | NA       |
| 375 | 0.00E+00 | 9.57E+06 | 1.56E+09 | 1.70E+09 | 3.23E+06 | 3.18E+06 | 0.00E+00 | 0.00E+00 | 5.63E-03 | 3.01E+00 |
| 376 | NA       | NA       | 1.61E+09 | 1.58E+09 | 3.89E+06 | 5.15E+06 | NA       | NA       | NA       | NA       |

|     |          |          |          |          |          |          |          |          |          |          |
|-----|----------|----------|----------|----------|----------|----------|----------|----------|----------|----------|
| 377 | NA       | NA       | 1.69E+09 | 1.47E+09 | 5.06E+06 | 4.09E+06 | NA       | NA       | NA       | NA       |
| 378 | NA       | NA       | 1.49E+09 | 1.66E+09 | 6.86E+06 | 5.55E+06 | NA       | NA       | NA       | NA       |
| 379 | 2.23E+06 | 0.00E+00 | 1.46E+09 | 1.68E+09 | 5.11E+06 | 6.20E+06 | 1.53E-03 | 4.36E-01 | 0.00E+00 | 0.00E+00 |
| 380 | NA       | NA       | 1.45E+09 | 1.69E+09 | 2.72E+06 | 2.56E+06 | NA       | NA       | NA       | NA       |
| 381 | NA       | NA       | 1.60E+09 | 1.52E+09 | 5.16E+06 | 2.19E+06 | NA       | NA       | NA       | NA       |
| 382 | NA       | NA       | 1.56E+09 | 1.48E+09 | 4.12E+06 | 4.15E+06 | NA       | NA       | NA       | NA       |
| 383 | NA       | NA       | 1.23E+09 | 1.79E+09 | 9.58E+06 | 1.20E+07 | NA       | NA       | NA       | NA       |
| 384 | NA       | NA       | 1.50E+09 | 1.53E+09 | 2.68E+06 | 3.87E+06 | NA       | NA       | NA       | NA       |
| 385 | 1.21E+08 | 1.56E+07 | 1.33E+09 | 1.69E+09 | 7.56E+06 | 9.00E+06 | 9.16E-02 | 1.61E+01 | 9.22E-03 | 1.73E+00 |
| 386 | 4.17E+06 | 1.33E+07 | 1.58E+09 | 1.42E+09 | 3.26E+06 | 3.20E+06 | 2.64E-03 | 1.28E+00 | 9.38E-03 | 4.16E+00 |
| 387 | NA       | NA       | 1.46E+09 | 1.52E+09 | 9.15E+06 | 1.47E+07 | NA       | NA       | NA       | NA       |
| 388 | NA       | NA       | 1.58E+09 | 1.41E+09 | NA       | NA       | NA       | NA       | NA       | NA       |
| 389 | NA       | NA       | 1.47E+09 | 1.51E+09 | 8.57E+06 | 2.97E+06 | NA       | NA       | NA       | NA       |
| 390 | NA       | NA       | 1.64E+09 | 1.33E+09 | 1.05E+06 | 5.48E+06 | NA       | NA       | NA       | NA       |
| 391 | NA       | NA       | 1.64E+09 | 1.32E+09 | NA       | NA       | NA       | NA       | NA       | NA       |
| 392 | NA       | NA       | 1.55E+09 | 1.39E+09 | 3.15E+06 | 3.17E+06 | NA       | NA       | NA       | NA       |
| 393 | NA       | NA       | 1.63E+09 | 1.29E+09 | 4.96E+06 | 4.69E+06 | NA       | NA       | NA       | NA       |
| 394 | NA       | NA       | 1.23E+09 | 1.64E+09 | 3.37E+07 | 1.63E+07 | NA       | NA       | NA       | NA       |
| 395 | NA       | NA       | 1.51E+09 | 1.39E+09 | 3.79E+06 | 2.13E+06 | NA       | NA       | NA       | NA       |
| 396 | NA       | NA       | 1.48E+09 | 1.42E+09 | 1.84E+06 | 2.13E+06 | NA       | NA       | NA       | NA       |
| 397 | NA       | NA       | 1.40E+09 | 1.50E+09 | 3.53E+06 | 2.57E+06 | NA       | NA       | NA       | NA       |
| 398 | NA       | NA       | 1.32E+09 | 1.58E+09 | 2.12E+06 | 1.87E+06 | NA       | NA       | NA       | NA       |
| 399 | 2.26E+06 | 5.09E+06 | 1.66E+09 | 1.22E+09 | 6.36E+06 | 2.15E+06 | 1.36E-03 | 3.56E-01 | 4.16E-03 | 2.37E+00 |
| 400 | NA       | NA       | 1.95E+09 | 8.92E+08 | 2.80E+07 | 2.59E+07 | NA       | NA       | NA       | NA       |
| 401 | NA       | NA       | 1.47E+09 | 1.38E+09 | 2.51E+06 | 1.86E+06 | NA       | NA       | NA       | NA       |
| 402 | NA       | NA       | 1.57E+09 | 1.28E+09 | 5.50E+06 | 4.19E+06 | NA       | NA       | NA       | NA       |
| 403 | NA       | NA       | 1.48E+09 | 1.38E+09 | 1.75E+06 | 1.11E+06 | NA       | NA       | NA       | NA       |
| 404 | 8.59E+06 | 3.26E+07 | 1.37E+09 | 1.46E+09 | 4.18E+06 | 5.40E+06 | 6.28E-03 | 2.06E+00 | 2.24E-02 | 6.03E+00 |
| 405 | 2.03E+06 | 0.00E+00 | 1.33E+09 | 1.47E+09 | 1.72E+07 | 1.44E+07 | 1.53E-03 | 1.19E-01 | 0.00E+00 | 0.00E+00 |
| 406 | NA       | NA       | 1.29E+09 | 1.53E+09 | NA       | NA       | NA       | NA       | NA       | NA       |
| 407 | 1.91E+07 | 0.00E+00 | 1.32E+09 | 1.49E+09 | 4.70E+06 | 2.87E+06 | 1.45E-02 | 4.06E+00 | 0.00E+00 | 0.00E+00 |
| 408 | NA       | NA       | 1.42E+09 | 1.39E+09 | 3.29E+06 | 5.27E+06 | NA       | NA       | NA       | NA       |
| 409 | 0.00E+00 | 4.72E+07 | 1.46E+09 | 1.33E+09 | 6.45E+06 | 2.74E+06 | 0.00E+00 | 0.00E+00 | 3.56E-02 | 1.72E+01 |
| 410 | NA       | NA       | 1.34E+09 | 1.43E+09 | 2.24E+06 | 2.23E+06 | NA       | NA       | NA       | NA       |
| 411 | 2.12E+05 | 0.00E+00 | 1.43E+09 | 1.29E+09 | 1.88E+07 | 1.61E+07 | 1.48E-04 | 1.13E-02 | 0.00E+00 | 0.00E+00 |
| 412 | NA       | NA       | 1.24E+09 | 1.47E+09 | 1.27E+07 | 7.27E+06 | NA       | NA       | NA       | NA       |
| 413 | NA       | NA       | 1.57E+09 | 1.16E+09 | 1.24E+06 | 7.48E+05 | NA       | NA       | NA       | NA       |
| 414 | 0.00E+00 | 0.00E+00 | 1.43E+09 | 1.27E+09 | 1.04E+07 | 1.12E+07 | 0.00E+00 | 0.00E+00 | 0.00E+00 | 0.00E+00 |

|     |          |          |          |          |          |          |          |          |          |          |
|-----|----------|----------|----------|----------|----------|----------|----------|----------|----------|----------|
| 415 | NA       | NA       | 1.29E+09 | 1.42E+09 | 2.24E+06 | 1.98E+06 | NA       | NA       | NA       | NA       |
| 416 | NA       | NA       | 1.39E+09 | 1.32E+09 | 3.13E+06 | 5.23E+06 | NA       | NA       | NA       | NA       |
| 417 | NA       | NA       | 1.67E+09 | 1.02E+09 | 7.87E+06 | 6.21E+06 | NA       | NA       | NA       | NA       |
| 418 | 4.28E+05 | 1.02E+06 | 1.34E+09 | 1.35E+09 | 3.33E+06 | 4.00E+06 | 3.20E-04 | 1.29E-01 | 7.56E-04 | 2.54E-01 |
| 419 | NA       | NA       | 1.42E+09 | 1.26E+09 | 4.57E+06 | 5.56E+06 | NA       | NA       | NA       | NA       |
| 420 | 2.88E+05 | 0.00E+00 | 1.19E+09 | 1.48E+09 | 3.52E+06 | 3.05E+06 | 2.42E-04 | 8.19E-02 | 0.00E+00 | 0.00E+00 |
| 421 | NA       | NA       | 1.46E+09 | 1.18E+09 | 3.48E+06 | 1.50E+06 | NA       | NA       | NA       | NA       |
| 422 | NA       | NA       | 1.23E+09 | 1.40E+09 | 4.73E+06 | 6.09E+05 | NA       | NA       | NA       | NA       |
| 423 | NA       | NA       | 1.31E+09 | 1.30E+09 | 5.81E+06 | 6.19E+06 | NA       | NA       | NA       | NA       |
| 424 | NA       | NA       | 1.35E+09 | 1.23E+09 | 2.41E+06 | 1.23E+06 | NA       | NA       | NA       | NA       |
| 425 | NA       | NA       | 1.15E+09 | 1.42E+09 | 2.50E+06 | 1.88E+06 | NA       | NA       | NA       | NA       |
| 426 | NA       | NA       | 1.24E+09 | 1.31E+09 | 9.22E+06 | 7.72E+06 | NA       | NA       | NA       | NA       |
| 427 | 1.57E+07 | 0.00E+00 | 1.25E+09 | 1.30E+09 | 5.72E+06 | 3.33E+06 | 1.26E-02 | 2.74E+00 | 0.00E+00 | 0.00E+00 |
| 428 | NA       | NA       | 1.07E+09 | 1.46E+09 | 7.58E+06 | 9.13E+06 | NA       | NA       | NA       | NA       |
| 429 | NA       | NA       | 1.17E+09 | 1.33E+09 | 8.69E+06 | 8.58E+06 | NA       | NA       | NA       | NA       |
| 430 | 1.23E+07 | 1.43E+06 | 1.30E+09 | 1.17E+09 | 1.39E+07 | 5.83E+06 | 9.48E-03 | 8.87E-01 | 1.23E-03 | 2.46E-01 |
| 431 | NA       | NA       | 1.26E+09 | 1.16E+09 | 7.90E+06 | 3.19E+06 | NA       | NA       | NA       | NA       |
| 432 | NA       | NA       | 1.31E+09 | 1.11E+09 | 8.51E+06 | 4.15E+06 | NA       | NA       | NA       | NA       |
| 433 | NA       | NA       | 1.36E+09 | 1.05E+09 | 6.43E+05 | 1.07E+06 | NA       | NA       | NA       | NA       |
| 434 | 9.02E+06 | 5.08E+06 | 1.36E+09 | 1.04E+09 | 2.97E+06 | 2.29E+06 | 6.62E-03 | 3.04E+00 | 4.89E-03 | 2.22E+00 |
| 435 | 4.29E+06 | 8.13E+06 | 9.78E+08 | 1.37E+09 | 2.86E+07 | 1.39E+07 | 4.39E-03 | 1.50E-01 | 5.92E-03 | 5.84E-01 |
| 436 | 0.00E+00 | 3.22E+06 | 1.27E+09 | 1.11E+09 | 5.92E+06 | 6.27E+06 | 0.00E+00 | 0.00E+00 | 2.90E-03 | 5.14E-01 |
| 437 | NA       | NA       | 1.22E+09 | 1.15E+09 | 7.75E+06 | 4.83E+06 | NA       | NA       | NA       | NA       |
| 438 | NA       | NA       | 1.18E+09 | 1.19E+09 | 4.52E+06 | 2.62E+06 | NA       | NA       | NA       | NA       |
| 439 | NA       | NA       | 1.26E+09 | 1.11E+09 | 7.03E+06 | 3.67E+06 | NA       | NA       | NA       | NA       |
| 440 | NA       | NA       | 4.34E+08 | 1.94E+09 | 1.97E+06 | 1.87E+06 | NA       | NA       | NA       | NA       |
| 441 | NA       | NA       | 1.43E+09 | 9.33E+08 | 2.99E+06 | 5.01E+05 | NA       | NA       | NA       | NA       |
| 442 | 6.83E+06 | 0.00E+00 | 1.08E+09 | 1.27E+09 | 6.85E+06 | 2.51E+06 | 6.30E-03 | 9.96E-01 | 0.00E+00 | 0.00E+00 |
| 443 | 6.83E+06 | 0.00E+00 | 1.08E+09 | 1.27E+09 | 6.85E+06 | 2.51E+06 | 6.30E-03 | 9.96E-01 | 0.00E+00 | 0.00E+00 |
| 444 | NA       | NA       | 1.24E+09 | 1.10E+09 | 5.69E+06 | 7.25E+06 | NA       | NA       | NA       | NA       |
| 445 | NA       | NA       | 1.28E+09 | 1.05E+09 | 6.97E+06 | 2.46E+06 | NA       | NA       | NA       | NA       |
| 446 | 1.98E+07 | 5.80E+06 | 1.20E+09 | 1.13E+09 | 3.46E+06 | 5.65E+06 | 1.66E-02 | 5.74E+00 | 5.11E-03 | 1.03E+00 |
| 447 | NA       | NA       | 1.23E+09 | 1.10E+09 | 4.05E+06 | 1.98E+06 | NA       | NA       | NA       | NA       |
| 448 | 1.40E+06 | 0.00E+00 | 1.09E+09 | 1.24E+09 | 6.53E+06 | 3.74E+06 | 1.28E-03 | 2.14E-01 | 0.00E+00 | 0.00E+00 |
| 449 | NA       | NA       | 1.11E+09 | 1.21E+09 | 8.57E+06 | 2.88E+06 | NA       | NA       | NA       | NA       |
| 450 | 3.04E+06 | 0.00E+00 | 1.10E+09 | 1.22E+09 | 8.42E+06 | 3.22E+06 | 2.77E-03 | 3.61E-01 | 0.00E+00 | 0.00E+00 |
| 451 | 0.00E+00 | 1.25E+07 | 1.22E+09 | 1.10E+09 | 2.00E+06 | 1.25E+06 | 0.00E+00 | 0.00E+00 | 1.13E-02 | 9.97E+00 |
| 452 | 0.00E+00 | 1.25E+07 | 1.22E+09 | 1.10E+09 | 2.00E+06 | 1.25E+06 | 0.00E+00 | 0.00E+00 | 1.13E-02 | 9.97E+00 |

|     |          |          |          |          |          |          |          |          |          |          |
|-----|----------|----------|----------|----------|----------|----------|----------|----------|----------|----------|
| 453 | NA       | NA       | 1.32E+09 | 9.96E+08 | 4.64E+06 | 3.75E+06 | NA       | NA       | NA       | NA       |
| 454 | NA       | NA       | 1.17E+09 | 1.13E+09 | 1.91E+06 | 2.27E+06 | NA       | NA       | NA       | NA       |
| 455 | NA       | NA       | 1.27E+09 | 1.03E+09 | 2.88E+06 | 2.28E+06 | NA       | NA       | NA       | NA       |
| 456 | NA       | NA       | 1.24E+09 | 1.05E+09 | 2.35E+06 | 1.74E+06 | NA       | NA       | NA       | NA       |
| 457 | NA       | NA       | 1.21E+09 | 1.07E+09 | 2.91E+06 | 1.95E+06 | NA       | NA       | NA       | NA       |
| 458 | NA       | NA       | 1.14E+09 | 1.14E+09 | 7.06E+05 | 2.10E+06 | NA       | NA       | NA       | NA       |
| 459 | 3.14E+05 | 0.00E+00 | 1.19E+09 | 1.07E+09 | 3.85E+06 | 2.54E+06 | 2.64E-04 | 8.16E-02 | 0.00E+00 | 0.00E+00 |
| 460 | 5.44E+06 | 1.09E+07 | 1.25E+09 | 1.02E+09 | 2.08E+06 | 0.00E+00 | 4.36E-03 | 2.62E+00 | 1.07E-02 | Inf      |
| 461 | 1.84E+06 | 0.00E+00 | 1.11E+09 | 1.15E+09 | 1.90E+06 | 1.24E+06 | 1.66E-03 | 9.67E-01 | 0.00E+00 | 0.00E+00 |
| 462 | NA       | NA       | 1.17E+09 | 1.09E+09 | 3.08E+06 | 7.97E+05 | NA       | NA       | NA       | NA       |
| 463 | NA       | NA       | 9.14E+08 | 1.34E+09 | 4.46E+06 | 2.85E+06 | NA       | NA       | NA       | NA       |
| 464 | 2.28E+05 | 5.25E+07 | 1.34E+09 | 9.12E+08 | 2.12E+06 | 1.52E+06 | 1.70E-04 | 1.08E-01 | 5.75E-02 | 3.45E+01 |
| 465 | 2.28E+05 | 5.25E+07 | 1.34E+09 | 9.12E+08 | 2.12E+06 | 1.52E+06 | 1.70E-04 | 1.08E-01 | 5.75E-02 | 3.45E+01 |
| 466 | NA       | NA       | 1.11E+09 | 1.11E+09 | 8.74E+06 | 2.51E+06 | NA       | NA       | NA       | NA       |
| 467 | NA       | NA       | 1.34E+09 | 8.86E+08 | 2.86E+06 | 2.91E+06 | NA       | NA       | NA       | NA       |
| 468 | 0.00E+00 | 3.87E+05 | 1.32E+09 | 8.94E+08 | 1.59E+06 | 1.73E+06 | 0.00E+00 | 0.00E+00 | 4.33E-04 | 2.24E-01 |
| 469 | 1.09E+06 | 0.00E+00 | 1.04E+09 | 1.14E+09 | 2.53E+06 | 7.55E+06 | 1.05E-03 | 4.31E-01 | 0.00E+00 | 0.00E+00 |
| 470 | NA       | NA       | 1.32E+09 | 8.55E+08 | 5.20E+06 | 6.85E+06 | NA       | NA       | NA       | NA       |
| 471 | NA       | NA       | 1.34E+09 | 8.41E+08 | 1.57E+06 | 1.63E+06 | NA       | NA       | NA       | NA       |
| 472 | NA       | NA       | 1.15E+09 | 1.03E+09 | 1.64E+06 | 1.01E+06 | NA       | NA       | NA       | NA       |
| 473 | NA       | NA       | 1.16E+09 | 1.00E+09 | 2.79E+06 | 2.67E+06 | NA       | NA       | NA       | NA       |
| 474 | NA       | NA       | 1.18E+09 | 9.65E+08 | 3.17E+06 | 5.00E+06 | NA       | NA       | NA       | NA       |
| 475 | 7.67E+06 | 0.00E+00 | 1.09E+09 | 1.04E+09 | 5.71E+06 | 6.07E+06 | 7.03E-03 | 1.34E+00 | 0.00E+00 | 0.00E+00 |
| 476 | NA       | NA       | 9.74E+08 | 1.15E+09 | 5.80E+06 | 4.53E+06 | NA       | NA       | NA       | NA       |
| 477 | 1.04E+06 | 0.00E+00 | 1.04E+09 | 1.07E+09 | 3.63E+06 | 2.60E+06 | 9.98E-04 | 2.86E-01 | 0.00E+00 | 0.00E+00 |
| 478 | NA       | NA       | 1.01E+09 | 1.09E+09 | 3.89E+06 | 2.87E+06 | NA       | NA       | NA       | NA       |
| 479 | NA       | NA       | 1.11E+09 | 9.90E+08 | 2.05E+06 | 3.41E+05 | NA       | NA       | NA       | NA       |
| 480 | NA       | NA       | 1.12E+09 | 9.76E+08 | 5.33E+06 | 1.36E+06 | NA       | NA       | NA       | NA       |
| 481 | NA       | NA       | 1.05E+09 | 1.04E+09 | 6.57E+06 | 2.82E+06 | NA       | NA       | NA       | NA       |
| 482 | NA       | NA       | 1.02E+09 | 1.06E+09 | 5.04E+06 | 6.78E+06 | NA       | NA       | NA       | NA       |
| 483 | NA       | NA       | 9.84E+08 | 1.10E+09 | 4.82E+06 | 2.93E+06 | NA       | NA       | NA       | NA       |
| 484 | 8.68E+06 | 3.86E+06 | 9.17E+08 | 1.15E+09 | 3.93E+06 | 7.78E+06 | 9.46E-03 | 2.21E+00 | 3.34E-03 | 4.96E-01 |
| 485 | NA       | NA       | 1.14E+09 | 9.30E+08 | 1.75E+06 | 9.86E+05 | NA       | NA       | NA       | NA       |
| 486 | NA       | NA       | 1.05E+09 | 9.97E+08 | 5.05E+06 | 8.63E+06 | NA       | NA       | NA       | NA       |
| 487 | NA       | NA       | 9.98E+08 | 1.05E+09 | 1.90E+06 | 1.09E+06 | NA       | NA       | NA       | NA       |
| 488 | NA       | NA       | 1.05E+09 | 9.85E+08 | 4.38E+06 | 4.97E+06 | NA       | NA       | NA       | NA       |
| 489 | 4.61E+06 | 1.12E+07 | 9.87E+08 | 1.05E+09 | 7.31E+06 | 4.50E+06 | 4.67E-03 | 6.30E-01 | 1.07E-02 | 2.48E+00 |
| 490 | NA       | NA       | 1.10E+09 | 9.34E+08 | 3.57E+06 | 2.14E+06 | NA       | NA       | NA       | NA       |

|     |          |          |          |          |          |          |          |          |          |          |
|-----|----------|----------|----------|----------|----------|----------|----------|----------|----------|----------|
| 491 | NA       | NA       | 9.84E+08 | 1.03E+09 | 3.31E+06 | 3.79E+06 | NA       | NA       | NA       | NA       |
| 492 | NA       | NA       | 1.02E+09 | 1.00E+09 | 4.15E+06 | 2.98E+06 | NA       | NA       | NA       | NA       |
| 493 | NA       | NA       | 9.88E+08 | 1.03E+09 | 1.48E+06 | 1.23E+06 | NA       | NA       | NA       | NA       |
| 494 | 3.11E+07 | 2.47E+07 | 1.02E+09 | 9.77E+08 | 4.43E+06 | 6.32E+06 | 3.04E-02 | 7.01E+00 | 2.53E-02 | 3.91E+00 |
| 495 | 5.87E+06 | 4.01E+07 | 1.00E+09 | 9.93E+08 | 3.16E+06 | 2.37E+06 | 5.85E-03 | 1.86E+00 | 4.04E-02 | 1.69E+01 |
| 496 | NA       | NA       | 1.08E+09 | 9.06E+08 | 1.36E+06 | 1.68E+06 | NA       | NA       | NA       | NA       |
| 497 | NA       | NA       | 1.14E+09 | 8.36E+08 | 4.66E+06 | 2.73E+06 | NA       | NA       | NA       | NA       |
| 498 | 3.04E+06 | 0.00E+00 | 1.06E+09 | 9.03E+08 | 2.61E+06 | 2.67E+06 | 2.86E-03 | 1.17E+00 | 0.00E+00 | 0.00E+00 |
| 499 | NA       | NA       | 8.02E+08 | 1.13E+09 | 8.17E+06 | 6.13E+06 | NA       | NA       | NA       | NA       |
| 500 | NA       | NA       | 7.82E+08 | 1.15E+09 | 2.69E+06 | 1.83E+06 | NA       | NA       | NA       | NA       |
| 501 | NA       | NA       | 9.15E+08 | 9.96E+08 | 2.18E+06 | 2.53E+06 | NA       | NA       | NA       | NA       |
| 502 | NA       | NA       | 9.42E+08 | 9.68E+08 | 2.84E+06 | 1.84E+06 | NA       | NA       | NA       | NA       |
| 503 | NA       | NA       | 1.06E+09 | 8.42E+08 | 3.55E+06 | 2.61E+06 | NA       | NA       | NA       | NA       |
| 504 | NA       | NA       | 1.43E+09 | 4.60E+08 | 3.31E+06 | 1.82E+06 | NA       | NA       | NA       | NA       |
| 505 | NA       | NA       | 9.22E+08 | 9.57E+08 | 3.85E+06 | 3.84E+06 | NA       | NA       | NA       | NA       |
| 506 | NA       | NA       | 9.72E+08 | 8.98E+08 | 2.37E+06 | 1.83E+06 | NA       | NA       | NA       | NA       |
| 507 | NA       | NA       | 1.30E+09 | 5.26E+08 | 2.52E+07 | 1.90E+07 | NA       | NA       | NA       | NA       |
| 508 | NA       | NA       | 1.06E+09 | 8.03E+08 | 2.97E+06 | 2.81E+06 | NA       | NA       | NA       | NA       |
| 509 | 1.04E+06 | 0.00E+00 | 8.52E+08 | 9.85E+08 | 4.61E+06 | 1.11E+07 | 1.22E-03 | 2.26E-01 | 0.00E+00 | 0.00E+00 |
| 510 | NA       | NA       | 9.88E+08 | 8.57E+08 | 1.85E+06 | 1.42E+06 | NA       | NA       | NA       | NA       |
| 511 | NA       | NA       | 1.10E+09 | 7.45E+08 | 1.53E+06 | 1.63E+06 | NA       | NA       | NA       | NA       |
| 512 | NA       | NA       | 7.28E+08 | 1.10E+09 | 2.46E+06 | 6.15E+06 | NA       | NA       | NA       | NA       |
| 513 | NA       | NA       | 9.63E+08 | 8.63E+08 | 2.43E+06 | 2.58E+06 | NA       | NA       | NA       | NA       |
| 514 | NA       | NA       | 8.38E+08 | 9.40E+08 | 1.55E+07 | 1.56E+07 | NA       | NA       | NA       | NA       |
| 515 | 3.07E+05 | 0.00E+00 | 9.00E+08 | 9.01E+08 | 1.25E+06 | 2.09E+06 | 3.41E-04 | 2.46E-01 | 0.00E+00 | 0.00E+00 |
| 516 | NA       | NA       | 8.58E+08 | 9.30E+08 | 4.36E+06 | 1.32E+06 | NA       | NA       | NA       | NA       |
| 517 | NA       | NA       | 8.75E+08 | 9.01E+08 | 8.49E+06 | 7.23E+06 | NA       | NA       | NA       | NA       |
| 518 | NA       | NA       | 8.65E+08 | 9.09E+08 | 2.77E+06 | 2.91E+06 | NA       | NA       | NA       | NA       |
| 519 | NA       | NA       | 8.27E+08 | 9.38E+08 | 6.55E+05 | 0.00E+00 | NA       | NA       | NA       | NA       |
| 520 | NA       | NA       | 7.80E+08 | 9.81E+08 | 2.23E+06 | 1.13E+06 | NA       | NA       | NA       | NA       |
| 521 | NA       | NA       | 9.78E+08 | 7.69E+08 | 2.39E+06 | 3.03E+06 | NA       | NA       | NA       | NA       |
| 522 | NA       | NA       | 8.37E+08 | 8.98E+08 | 4.08E+06 | 1.41E+06 | NA       | NA       | NA       | NA       |
| 523 | 7.94E+05 | 2.90E+05 | 9.08E+08 | 8.17E+08 | 3.29E+06 | 1.78E+06 | 8.74E-04 | 2.41E-01 | 3.54E-04 | 1.62E-01 |
| 524 | NA       | NA       | 8.89E+08 | 8.37E+08 | 6.66E+05 | 1.39E+06 | NA       | NA       | NA       | NA       |
| 525 | NA       | NA       | 9.42E+08 | 7.75E+08 | 2.14E+06 | 2.16E+06 | NA       | NA       | NA       | NA       |
| 526 | 2.97E+07 | 8.79E+05 | 8.73E+08 | 8.24E+08 | 6.32E+06 | 6.97E+06 | 3.41E-02 | 4.70E+00 | 1.07E-03 | 1.26E-01 |
| 527 | NA       | NA       | 9.18E+08 | 7.83E+08 | 2.16E+06 | 5.34E+06 | NA       | NA       | NA       | NA       |
| 528 | NA       | NA       | 8.88E+08 | 8.14E+08 | 2.63E+06 | 1.05E+06 | NA       | NA       | NA       | NA       |

|     |          |          |          |          |          |          |          |          |          |          |
|-----|----------|----------|----------|----------|----------|----------|----------|----------|----------|----------|
| 529 | 4.95E+05 | 0.00E+00 | 8.81E+08 | 8.03E+08 | 9.20E+06 | 9.53E+06 | 5.62E-04 | 5.38E-02 | 0.00E+00 | 0.00E+00 |
| 530 | NA       | NA       | 9.00E+08 | 7.87E+08 | 5.23E+06 | 3.79E+06 | NA       | NA       | NA       | NA       |
| 531 | NA       | NA       | 7.79E+08 | 9.09E+08 | 3.49E+06 | 3.79E+06 | NA       | NA       | NA       | NA       |
| 532 | NA       | NA       | 9.17E+08 | 7.69E+08 | 1.63E+06 | 1.02E+06 | NA       | NA       | NA       | NA       |
| 533 | NA       | NA       | 8.00E+08 | 8.78E+08 | 3.40E+06 | 2.57E+06 | NA       | NA       | NA       | NA       |
| 534 | NA       | NA       | 8.61E+08 | 8.18E+08 | 2.68E+06 | 2.16E+06 | NA       | NA       | NA       | NA       |
| 535 | 0.00E+00 | 2.03E+05 | 7.74E+08 | 8.95E+08 | 2.35E+06 | 2.38E+06 | 0.00E+00 | 0.00E+00 | 2.27E-04 | 8.54E-02 |
| 536 | NA       | NA       | 8.27E+08 | 8.34E+08 | 5.51E+06 | 1.49E+06 | NA       | NA       | NA       | NA       |
| 537 | NA       | NA       | 8.49E+08 | 8.16E+08 | 1.12E+06 | 3.75E+05 | NA       | NA       | NA       | NA       |
| 538 | NA       | NA       | 8.11E+08 | 8.52E+08 | 2.11E+06 | 3.55E+05 | NA       | NA       | NA       | NA       |
| 539 | NA       | NA       | 9.06E+08 | 7.54E+08 | 2.10E+06 | 1.18E+06 | NA       | NA       | NA       | NA       |
| 540 | NA       | NA       | 8.15E+08 | 8.43E+08 | 1.58E+06 | 2.24E+06 | NA       | NA       | NA       | NA       |
| 541 | NA       | NA       | 1.10E+09 | 5.57E+08 | 0.00E+00 | 1.57E+05 | NA       | NA       | NA       | NA       |
| 542 | NA       | NA       | 8.91E+08 | 7.61E+08 | 2.70E+06 | 2.19E+06 | NA       | NA       | NA       | NA       |
| 543 | 5.11E+06 | 0.00E+00 | 8.09E+08 | 8.44E+08 | 1.30E+06 | 2.64E+06 | 6.32E-03 | 3.94E+00 | 0.00E+00 | 0.00E+00 |
| 544 | 1.11E+07 | 0.00E+00 | 8.41E+08 | 8.06E+08 | 3.98E+06 | 1.71E+06 | 1.32E-02 | 2.80E+00 | 0.00E+00 | 0.00E+00 |
| 545 | NA       | NA       | 6.76E+08 | 9.69E+08 | NA       | NA       | NA       | NA       | NA       | NA       |
| 546 | NA       | NA       | 7.58E+08 | 8.80E+08 | 2.58E+06 | 8.07E+05 | NA       | NA       | NA       | NA       |
| 547 | NA       | NA       | 9.13E+08 | 7.19E+08 | 5.26E+06 | 2.65E+06 | NA       | NA       | NA       | NA       |
| 548 | NA       | NA       | 7.92E+08 | 8.37E+08 | 4.01E+06 | 2.98E+06 | NA       | NA       | NA       | NA       |
| 549 | NA       | NA       | 1.20E+09 | 4.24E+08 | 5.35E+06 | 6.30E+06 | NA       | NA       | NA       | NA       |
| 550 | NA       | NA       | 7.43E+08 | 8.88E+08 | 1.44E+06 | 2.00E+06 | NA       | NA       | NA       | NA       |
| 551 | 6.44E+05 | 0.00E+00 | 8.52E+08 | 7.70E+08 | 2.49E+06 | 2.65E+06 | 7.57E-04 | 2.59E-01 | 0.00E+00 | 0.00E+00 |
| 552 | NA       | NA       | 7.22E+08 | 9.01E+08 | 1.56E+06 | 7.60E+05 | NA       | NA       | NA       | NA       |
| 553 | 4.16E+05 | 0.00E+00 | 7.84E+08 | 8.34E+08 | 8.85E+05 | 1.98E+06 | 5.31E-04 | 4.71E-01 | 0.00E+00 | 0.00E+00 |
| 554 | NA       | NA       | 9.10E+08 | 7.06E+08 | 3.19E+06 | 8.06E+05 | NA       | NA       | NA       | NA       |
| 555 | NA       | NA       | 9.36E+08 | 6.76E+08 | 1.48E+06 | 1.25E+06 | NA       | NA       | NA       | NA       |
| 556 | NA       | NA       | 9.38E+08 | 6.69E+08 | 1.88E+06 | 0.00E+00 | NA       | NA       | NA       | NA       |
| 557 | NA       | NA       | 7.57E+08 | 8.44E+08 | 2.45E+06 | 8.30E+05 | NA       | NA       | NA       | NA       |
| 558 | NA       | NA       | 7.53E+08 | 8.37E+08 | 2.98E+06 | 1.98E+06 | NA       | NA       | NA       | NA       |
| 559 | NA       | NA       | 8.29E+08 | 7.62E+08 | 1.37E+06 | 2.60E+06 | NA       | NA       | NA       | NA       |
| 560 | NA       | NA       | 8.26E+08 | 7.61E+08 | 3.36E+06 | 1.16E+06 | NA       | NA       | NA       | NA       |
| 561 | NA       | NA       | 8.17E+08 | 7.65E+08 | 3.65E+06 | 1.14E+06 | NA       | NA       | NA       | NA       |
| 562 | NA       | NA       | 7.30E+08 | 8.49E+08 | 3.98E+06 | 3.53E+05 | NA       | NA       | NA       | NA       |
| 563 | NA       | NA       | 7.12E+08 | 8.65E+08 | 1.08E+06 | 1.07E+06 | NA       | NA       | NA       | NA       |
| 564 | NA       | NA       | 8.37E+08 | 7.38E+08 | 2.82E+06 | 6.02E+05 | NA       | NA       | NA       | NA       |
| 565 | NA       | NA       | 7.82E+08 | 7.81E+08 | 1.44E+06 | 2.69E+06 | NA       | NA       | NA       | NA       |
| 566 | NA       | NA       | 7.27E+08 | 8.21E+08 | 1.50E+06 | 7.83E+05 | NA       | NA       | NA       | NA       |

|     |          |          |          |          |          |          |          |          |          |          |
|-----|----------|----------|----------|----------|----------|----------|----------|----------|----------|----------|
| 567 | NA       | NA       | 7.12E+08 | 8.09E+08 | 7.68E+06 | 8.03E+06 | NA       | NA       | NA       | NA       |
| 568 | NA       | NA       | 7.82E+08 | 7.40E+08 | 7.62E+06 | 3.36E+06 | NA       | NA       | NA       | NA       |
| 569 | NA       | NA       | 7.89E+08 | 7.39E+08 | 2.03E+06 | 1.72E+06 | NA       | NA       | NA       | NA       |
| 570 | 2.22E+06 | 0.00E+00 | 8.01E+08 | 7.21E+08 | 5.81E+06 | 2.41E+06 | 2.77E-03 | 3.82E-01 | 0.00E+00 | 0.00E+00 |
| 571 | NA       | NA       | 8.63E+08 | 6.59E+08 | 1.07E+06 | 1.03E+06 | NA       | NA       | NA       | NA       |
| 572 | NA       | NA       | 7.60E+08 | 7.31E+08 | 1.08E+07 | 6.42E+06 | NA       | NA       | NA       | NA       |
| 573 | NA       | NA       | 5.79E+08 | 9.17E+08 | 3.95E+06 | 5.05E+06 | NA       | NA       | NA       | NA       |
| 574 | NA       | NA       | 6.70E+08 | 8.30E+08 | 3.72E+06 | 1.58E+06 | NA       | NA       | NA       | NA       |
| 575 | NA       | NA       | 6.86E+08 | 7.96E+08 | 4.82E+06 | 2.26E+06 | NA       | NA       | NA       | NA       |
| 576 | NA       | NA       | 6.74E+08 | 8.10E+08 | 1.34E+06 | 2.63E+06 | NA       | NA       | NA       | NA       |
| 577 | NA       | NA       | 7.36E+08 | 7.47E+08 | 1.44E+06 | 2.04E+06 | NA       | NA       | NA       | NA       |
| 578 | NA       | NA       | 7.27E+08 | 7.51E+08 | 3.72E+06 | 3.87E+06 | NA       | NA       | NA       | NA       |
| 579 | NA       | NA       | 7.06E+08 | 7.68E+08 | 1.80E+06 | 1.39E+06 | NA       | NA       | NA       | NA       |
| 580 | NA       | NA       | 7.02E+08 | 7.64E+08 | 3.14E+06 | 2.69E+06 | NA       | NA       | NA       | NA       |
| 581 | NA       | NA       | 7.39E+08 | 7.23E+08 | 1.52E+06 | 2.41E+06 | NA       | NA       | NA       | NA       |
| 582 | NA       | NA       | 6.19E+08 | 8.41E+08 | 1.34E+06 | 1.13E+06 | NA       | NA       | NA       | NA       |
| 583 | 2.23E+07 | 4.76E+05 | 6.40E+08 | 8.07E+08 | 7.61E+06 | 6.34E+06 | 3.48E-02 | 2.93E+00 | 5.90E-04 | 7.51E-02 |
| 584 | NA       | NA       | 8.83E+08 | 5.70E+08 | 3.19E+06 | 2.23E+06 | NA       | NA       | NA       | NA       |
| 585 | NA       | NA       | 9.35E+08 | 5.17E+08 | 2.18E+06 | 1.60E+06 | NA       | NA       | NA       | NA       |
| 586 | NA       | NA       | 7.37E+08 | 7.06E+08 | 2.69E+06 | 1.22E+06 | NA       | NA       | NA       | NA       |
| 587 | NA       | NA       | 7.63E+08 | 6.79E+08 | 1.09E+06 | 9.75E+05 | NA       | NA       | NA       | NA       |
| 588 | NA       | NA       | 8.07E+08 | 6.23E+08 | 3.14E+05 | 2.88E+05 | NA       | NA       | NA       | NA       |
| 589 | NA       | NA       | 7.26E+08 | 7.01E+08 | 1.97E+06 | 1.89E+06 | NA       | NA       | NA       | NA       |
| 590 | NA       | NA       | 7.47E+08 | 6.78E+08 | 6.71E+05 | 4.76E+05 | NA       | NA       | NA       | NA       |
| 591 | NA       | NA       | 7.77E+08 | 6.41E+08 | 9.46E+05 | 1.85E+06 | NA       | NA       | NA       | NA       |
| 592 | NA       | NA       | 6.93E+08 | 7.18E+08 | 1.50E+06 | 2.25E+06 | NA       | NA       | NA       | NA       |
| 593 | NA       | NA       | 7.77E+08 | 6.25E+08 | 1.22E+06 | 3.62E+06 | NA       | NA       | NA       | NA       |
| 594 | NA       | NA       | 7.65E+08 | 6.33E+08 | 1.41E+06 | 1.02E+06 | NA       | NA       | NA       | NA       |
| 595 | NA       | NA       | 6.54E+08 | 7.39E+08 | 3.72E+06 | 2.03E+06 | NA       | NA       | NA       | NA       |
| 596 | NA       | NA       | 6.29E+08 | 7.61E+08 | 2.66E+06 | 0.00E+00 | NA       | NA       | NA       | NA       |
| 597 | NA       | NA       | 7.03E+08 | 6.80E+08 | 2.05E+06 | 8.20E+05 | NA       | NA       | NA       | NA       |
| 598 | 5.68E+07 | 4.01E+07 | 6.45E+08 | 7.30E+08 | 3.93E+06 | 2.80E+06 | 8.81E-02 | 1.44E+01 | 5.50E-02 | 1.43E+01 |
| 599 | NA       | NA       | 7.31E+08 | 6.43E+08 | 1.56E+06 | 3.62E+06 | NA       | NA       | NA       | NA       |
| 600 | NA       | NA       | 7.48E+08 | 6.27E+08 | 2.37E+06 | 4.62E+05 | NA       | NA       | NA       | NA       |
| 601 | NA       | NA       | 8.08E+08 | 5.55E+08 | 5.06E+06 | 3.55E+06 | NA       | NA       | NA       | NA       |
| 602 | NA       | NA       | 6.40E+08 | 7.23E+08 | 5.81E+06 | 1.80E+06 | NA       | NA       | NA       | NA       |
| 603 | 1.52E+07 | 0.00E+00 | 7.36E+08 | 6.27E+08 | 2.80E+06 | 4.25E+06 | 2.06E-02 | 5.42E+00 | 0.00E+00 | 0.00E+00 |
| 604 | NA       | NA       | 6.39E+08 | 7.26E+08 | 1.48E+06 | 3.55E+06 | NA       | NA       | NA       | NA       |



|     |          |          |          |          |          |          |          |          |          |          |
|-----|----------|----------|----------|----------|----------|----------|----------|----------|----------|----------|
| 605 | 1.68E+07 | 2.18E+08 | 7.87E+08 | 5.81E+08 | 2.03E+06 | 3.21E+05 | 2.13E-02 | 8.28E+00 | 3.75E-01 | 6.79E+02 |
| 606 | NA       | NA       | 8.32E+08 | 5.29E+08 | 1.58E+06 | 3.21E+06 | NA       | NA       | NA       | NA       |
| 607 | NA       | NA       | 7.17E+08 | 6.27E+08 | 1.24E+07 | 6.92E+06 | NA       | NA       | NA       | NA       |
| 608 | NA       | NA       | 7.09E+08 | 6.40E+08 | 3.01E+06 | 8.89E+05 | NA       | NA       | NA       | NA       |
| 609 | NA       | NA       | 6.62E+08 | 6.83E+08 | 4.00E+06 | 1.04E+06 | NA       | NA       | NA       | NA       |
| 610 | NA       | NA       | 6.62E+08 | 6.85E+08 | 1.15E+06 | 1.11E+06 | NA       | NA       | NA       | NA       |
| 611 | NA       | NA       | 6.33E+08 | 7.11E+08 | 1.47E+06 | 2.02E+06 | NA       | NA       | NA       | NA       |
| 612 | NA       | NA       | 6.40E+08 | 7.03E+08 | NA       | NA       | NA       | NA       | NA       | NA       |
| 613 | NA       | NA       | 6.55E+08 | 6.82E+08 | 2.06E+06 | 2.33E+06 | NA       | NA       | NA       | NA       |
| 614 | NA       | NA       | 7.77E+08 | 5.60E+08 | 1.69E+06 | 1.34E+06 | NA       | NA       | NA       | NA       |
| 615 | NA       | NA       | 8.28E+08 | 5.07E+08 | 2.93E+06 | 1.04E+06 | NA       | NA       | NA       | NA       |
| 616 | NA       | NA       | 6.13E+08 | 7.12E+08 | 1.54E+06 | 2.21E+06 | NA       | NA       | NA       | NA       |
| 617 | 2.01E+05 | 0.00E+00 | 7.27E+08 | 5.96E+08 | 1.68E+06 | 1.08E+06 | 2.76E-04 | 1.20E-01 | 0.00E+00 | 0.00E+00 |
| 618 | 1.55E+08 | 6.21E+06 | 5.30E+08 | 7.77E+08 | 1.14E+06 | 1.53E+07 | 2.92E-01 | 1.35E+02 | 7.99E-03 | 4.05E-01 |
| 619 | NA       | NA       | 6.41E+08 | 6.75E+08 | 3.26E+06 | 2.25E+06 | NA       | NA       | NA       | NA       |
| 620 | NA       | NA       | 7.51E+08 | 5.65E+08 | 2.27E+06 | 1.76E+06 | NA       | NA       | NA       | NA       |
| 621 | NA       | NA       | 6.81E+08 | 6.35E+08 | 1.38E+06 | 4.87E+05 | NA       | NA       | NA       | NA       |
| 622 | NA       | NA       | 7.89E+08 | 5.24E+08 | 9.98E+05 | 1.42E+06 | NA       | NA       | NA       | NA       |
| 623 | NA       | NA       | 6.59E+08 | 6.50E+08 | 2.97E+06 | 1.99E+06 | NA       | NA       | NA       | NA       |
| 624 | NA       | NA       | 5.43E+08 | 7.69E+08 | 3.13E+05 | 1.33E+06 | NA       | NA       | NA       | NA       |
| 625 | NA       | NA       | 7.21E+08 | 5.82E+08 | 1.25E+06 | 4.23E+05 | NA       | NA       | NA       | NA       |
| 626 | NA       | NA       | 6.28E+08 | 6.61E+08 | 2.25E+06 | 3.93E+06 | NA       | NA       | NA       | NA       |
| 627 | NA       | NA       | 5.37E+08 | 7.45E+08 | 5.35E+06 | 4.88E+06 | NA       | NA       | NA       | NA       |
| 628 | NA       | NA       | 5.51E+08 | 7.25E+08 | 1.56E+07 | 3.19E+05 | NA       | NA       | NA       | NA       |
| 629 | 7.86E+05 | 6.33E+05 | 6.85E+08 | 6.00E+08 | 3.02E+06 | 4.05E+06 | 1.15E-03 | 2.60E-01 | 1.06E-03 | 1.56E-01 |
| 630 | NA       | NA       | 6.74E+08 | 6.05E+08 | 2.20E+06 | 8.43E+06 | NA       | NA       | NA       | NA       |
| 631 | NA       | NA       | 7.43E+08 | 5.45E+08 | 1.45E+06 | 8.63E+05 | NA       | NA       | NA       | NA       |
| 632 | NA       | NA       | 6.44E+08 | 6.42E+08 | 1.32E+06 | 1.88E+06 | NA       | NA       | NA       | NA       |
| 633 | NA       | NA       | 6.84E+08 | 6.03E+08 | 7.69E+05 | 4.00E+05 | NA       | NA       | NA       | NA       |
| 634 | NA       | NA       | 7.43E+08 | 5.32E+08 | 1.66E+06 | 1.34E+06 | NA       | NA       | NA       | NA       |
| 635 | NA       | NA       | 6.03E+08 | 6.70E+08 | 1.44E+06 | 1.42E+06 | NA       | NA       | NA       | NA       |
| 636 | NA       | NA       | 7.65E+08 | 5.05E+08 | 1.66E+06 | 1.41E+06 | NA       | NA       | NA       | NA       |
| 637 | NA       | NA       | 5.72E+08 | 6.98E+08 | 7.63E+05 | 1.46E+06 | NA       | NA       | NA       | NA       |
| 638 | NA       | NA       | 7.31E+08 | 5.38E+08 | 3.21E+05 | 9.89E+05 | NA       | NA       | NA       | NA       |
| 639 | NA       | NA       | 6.58E+08 | 6.02E+08 | 2.89E+06 | 3.16E+06 | NA       | NA       | NA       | NA       |
| 640 | NA       | NA       | 7.12E+08 | 5.49E+08 | 7.83E+05 | 7.71E+05 | NA       | NA       | NA       | NA       |
| 641 | NA       | NA       | 5.46E+08 | 6.94E+08 | 2.52E+06 | 1.67E+06 | NA       | NA       | NA       | NA       |
| 642 | NA       | NA       | 6.53E+08 | 5.85E+08 | 3.74E+06 | 1.28E+06 | NA       | NA       | NA       | NA       |

|     |          |          |          |          |          |          |          |          |          |          |
|-----|----------|----------|----------|----------|----------|----------|----------|----------|----------|----------|
| 643 | NA       | NA       | 6.74E+08 | 5.59E+08 | 3.22E+06 | 2.77E+06 | NA       | NA       | NA       | NA       |
| 644 | NA       | NA       | 7.39E+08 | 4.91E+08 | 6.11E+06 | 2.54E+06 | NA       | NA       | NA       | NA       |
| 645 | NA       | NA       | 8.48E+08 | 3.79E+08 | 3.12E+06 | 7.66E+05 | NA       | NA       | NA       | NA       |
| 646 | NA       | NA       | 6.68E+08 | 5.54E+08 | 3.94E+06 | 3.78E+06 | NA       | NA       | NA       | NA       |
| 647 | NA       | NA       | 6.53E+08 | 5.71E+08 | 1.49E+06 | 9.93E+05 | NA       | NA       | NA       | NA       |
| 648 | 1.26E+06 | 0.00E+00 | 6.86E+08 | 5.36E+08 | 1.17E+06 | 1.65E+06 | 1.83E-03 | 1.07E+00 | 0.00E+00 | 0.00E+00 |
| 649 | NA       | NA       | 6.06E+08 | 6.09E+08 | 2.29E+06 | 2.77E+06 | NA       | NA       | NA       | NA       |
| 650 | NA       | NA       | 3.91E+08 | 8.27E+08 | NA       | NA       | NA       | NA       | NA       | NA       |
| 651 | 8.41E+05 | 0.00E+00 | 6.18E+08 | 5.92E+08 | 2.68E+06 | 2.59E+06 | 1.36E-03 | 3.14E-01 | 0.00E+00 | 0.00E+00 |
| 652 | NA       | NA       | 5.81E+08 | 6.27E+08 | 1.87E+06 | 1.06E+06 | NA       | NA       | NA       | NA       |
| 653 | NA       | NA       | 6.13E+08 | 5.85E+08 | 2.68E+06 | 4.53E+06 | NA       | NA       | NA       | NA       |
| 654 | 6.36E+05 | 0.00E+00 | 6.01E+08 | 6.01E+08 | 1.76E+06 | 1.54E+06 | 1.06E-03 | 3.62E-01 | 0.00E+00 | 0.00E+00 |
| 655 | NA       | NA       | 5.79E+08 | 5.92E+08 | 8.89E+06 | 2.35E+07 | NA       | NA       | NA       | NA       |
| 656 | NA       | NA       | 6.27E+08 | 5.72E+08 | 3.57E+06 | 7.11E+05 | NA       | NA       | NA       | NA       |
| 657 | NA       | NA       | 5.80E+08 | 6.17E+08 | 4.38E+06 | 1.51E+06 | NA       | NA       | NA       | NA       |
| 658 | 6.47E+07 | 3.70E+07 | 5.73E+08 | 6.20E+08 | 3.90E+06 | 2.68E+06 | 1.13E-01 | 1.66E+01 | 5.97E-02 | 1.38E+01 |
| 659 | NA       | NA       | 6.63E+08 | 5.30E+08 | 4.73E+06 | 1.43E+06 | NA       | NA       | NA       | NA       |
| 660 | NA       | NA       | 5.89E+08 | 6.02E+08 | 2.08E+06 | 1.89E+06 | NA       | NA       | NA       | NA       |
| 661 | NA       | NA       | 7.11E+08 | 4.78E+08 | NA       | NA       | NA       | NA       | NA       | NA       |
| 662 | 5.91E+06 | 0.00E+00 | 6.04E+08 | 5.80E+08 | 3.39E+06 | 1.10E+06 | 9.79E-03 | 1.74E+00 | 0.00E+00 | 0.00E+00 |
| 663 | NA       | NA       | 6.06E+08 | 5.77E+08 | 1.82E+06 | 2.27E+06 | NA       | NA       | NA       | NA       |
| 664 | NA       | NA       | 7.03E+08 | 4.82E+08 | 1.09E+06 | 5.34E+05 | NA       | NA       | NA       | NA       |
| 665 | NA       | NA       | 4.85E+08 | 6.96E+08 | 0.00E+00 | 2.32E+06 | NA       | NA       | NA       | NA       |
| 666 | NA       | NA       | 5.94E+08 | 5.83E+08 | 4.64E+06 | 2.03E+06 | NA       | NA       | NA       | NA       |
| 667 | NA       | NA       | 5.62E+08 | 6.13E+08 | 2.75E+06 | 3.59E+06 | NA       | NA       | NA       | NA       |
| 668 | 3.25E+07 | 0.00E+00 | 6.29E+08 | 5.47E+08 | 2.55E+06 | 2.69E+06 | 5.16E-02 | 1.27E+01 | 0.00E+00 | 0.00E+00 |
| 669 | NA       | NA       | 5.30E+08 | 6.45E+08 | 1.78E+06 | 7.25E+05 | NA       | NA       | NA       | NA       |
| 670 | NA       | NA       | 6.38E+08 | 5.39E+08 | 3.98E+05 | 0.00E+00 | NA       | NA       | NA       | NA       |
| 671 | NA       | NA       | 6.58E+08 | 5.16E+08 | 9.89E+05 | 8.27E+05 | NA       | NA       | NA       | NA       |
| 672 | NA       | NA       | 6.87E+08 | 4.86E+08 | NA       | NA       | NA       | NA       | NA       | NA       |
| 673 | 5.36E+07 | 5.25E+07 | 6.09E+08 | 5.49E+08 | 7.75E+06 | 4.71E+06 | 8.79E-02 | 6.91E+00 | 9.55E-02 | 1.11E+01 |
| 674 | NA       | NA       | 6.21E+08 | 5.42E+08 | 4.56E+06 | 2.40E+06 | NA       | NA       | NA       | NA       |
| 675 | NA       | NA       | 7.09E+08 | 4.53E+08 | 2.42E+06 | 1.30E+06 | NA       | NA       | NA       | NA       |
| 676 | 1.22E+05 | 0.00E+00 | 5.74E+08 | 5.87E+08 | 1.72E+06 | 1.53E+06 | 2.13E-04 | 7.13E-02 | 0.00E+00 | 0.00E+00 |
| 677 | NA       | NA       | 6.14E+08 | 5.46E+08 | 1.19E+06 | 5.99E+05 | NA       | NA       | NA       | NA       |
| 678 | NA       | NA       | 5.85E+08 | 5.71E+08 | NA       | NA       | NA       | NA       | NA       | NA       |
| 679 | NA       | NA       | 6.69E+08 | 4.83E+08 | 1.13E+06 | 2.06E+06 | NA       | NA       | NA       | NA       |
| 680 | NA       | NA       | 7.09E+08 | 4.40E+08 | 3.67E+06 | 1.26E+06 | NA       | NA       | NA       | NA       |

|     |          |          |          |          |          |          |          |          |          |          |
|-----|----------|----------|----------|----------|----------|----------|----------|----------|----------|----------|
| 681 | NA       | NA       | 5.60E+08 | 5.91E+08 | 1.03E+06 | 0.00E+00 | NA       | NA       | NA       | NA       |
| 682 | NA       | NA       | 5.91E+08 | 5.59E+08 | 6.83E+05 | 5.35E+05 | NA       | NA       | NA       | NA       |
| 683 | NA       | NA       | 5.99E+08 | 5.40E+08 | 1.31E+06 | 3.23E+06 | NA       | NA       | NA       | NA       |
| 684 | NA       | NA       | 6.34E+08 | 5.00E+08 | 3.74E+06 | 2.87E+06 | NA       | NA       | NA       | NA       |
| 685 | NA       | NA       | 6.05E+08 | 5.26E+08 | 1.32E+06 | 1.25E+06 | NA       | NA       | NA       | NA       |
| 686 | 1.73E+06 | 0.00E+00 | 5.38E+08 | 5.84E+08 | 4.68E+06 | 1.45E+06 | 3.21E-03 | 3.69E-01 | 0.00E+00 | 0.00E+00 |
| 687 | NA       | NA       | 5.66E+08 | 5.47E+08 | 6.76E+06 | 3.92E+06 | NA       | NA       | NA       | NA       |
| 688 | NA       | NA       | 6.53E+08 | 4.61E+08 | 2.53E+06 | 5.06E+06 | NA       | NA       | NA       | NA       |
| 689 | NA       | NA       | 4.98E+08 | 6.17E+08 | 1.47E+06 | 2.33E+05 | NA       | NA       | NA       | NA       |
| 690 | NA       | NA       | 6.00E+08 | 5.14E+08 | 2.59E+06 | 7.67E+05 | NA       | NA       | NA       | NA       |
| 691 | 9.98E+06 | 0.00E+00 | 4.77E+08 | 6.32E+08 | 1.24E+06 | 3.27E+06 | 2.09E-02 | 8.05E+00 | 0.00E+00 | 0.00E+00 |
| 692 | 0.00E+00 | 5.80E+06 | 5.76E+08 | 5.35E+08 | 6.53E+05 | 1.60E+06 | 0.00E+00 | 0.00E+00 | 1.09E-02 | 3.62E+00 |
| 693 | NA       | NA       | 5.04E+08 | 5.97E+08 | 7.20E+06 | 3.03E+06 | NA       | NA       | NA       | NA       |
| 694 | 2.05E+06 | 0.00E+00 | 5.12E+08 | 5.91E+08 | 3.18E+06 | 3.62E+06 | 4.01E-03 | 6.46E-01 | 0.00E+00 | 0.00E+00 |
| 695 | 1.38E+07 | 0.00E+00 | 4.88E+08 | 6.15E+08 | 2.59E+06 | 3.51E+06 | 2.84E-02 | 5.33E+00 | 0.00E+00 | 0.00E+00 |
| 696 | NA       | NA       | 6.67E+08 | 4.39E+08 | 1.12E+06 | 1.36E+06 | NA       | NA       | NA       | NA       |
| 697 | NA       | NA       | 5.84E+08 | 5.18E+08 | 2.48E+06 | 0.00E+00 | NA       | NA       | NA       | NA       |
| 698 | 7.51E+07 | 0.00E+00 | 4.90E+08 | 6.04E+08 | 8.59E+05 | 8.57E+06 | 1.53E-01 | 8.74E+01 | 0.00E+00 | 0.00E+00 |
| 699 | NA       | NA       | 5.46E+08 | 5.44E+08 | 2.13E+06 | 2.28E+06 | NA       | NA       | NA       | NA       |
| 700 | NA       | NA       | 5.12E+08 | 5.79E+08 | 8.69E+05 | 7.63E+05 | NA       | NA       | NA       | NA       |
| 701 | NA       | NA       | 5.26E+08 | 5.64E+08 | 6.55E+05 | 1.31E+06 | NA       | NA       | NA       | NA       |
| 702 | NA       | NA       | 5.08E+08 | 5.77E+08 | 2.97E+06 | 6.15E+05 | NA       | NA       | NA       | NA       |
| 703 | NA       | NA       | 6.05E+08 | 4.80E+08 | 5.90E+05 | 4.25E+05 | NA       | NA       | NA       | NA       |
| 704 | NA       | NA       | 4.68E+08 | 6.07E+08 | 6.25E+06 | 2.46E+06 | NA       | NA       | NA       | NA       |
| 705 | 1.42E+06 | 0.00E+00 | 5.74E+08 | 5.02E+08 | 1.37E+06 | 5.88E+05 | 2.48E-03 | 1.04E+00 | 0.00E+00 | 0.00E+00 |
| 706 | NA       | NA       | 5.72E+08 | 4.87E+08 | 3.02E+06 | 1.94E+06 | NA       | NA       | NA       | NA       |
| 707 | NA       | NA       | 5.07E+08 | 5.50E+08 | 3.07E+06 | 2.55E+06 | NA       | NA       | NA       | NA       |
| 708 | 3.95E+05 | 0.00E+00 | 6.25E+08 | 4.35E+08 | 1.26E+06 | 7.99E+05 | 6.31E-04 | 3.13E-01 | 0.00E+00 | 0.00E+00 |
| 709 | 3.90E+06 | 3.31E+05 | 4.90E+08 | 5.65E+08 | 3.40E+06 | 2.51E+06 | 7.95E-03 | 1.15E+00 | 5.86E-04 | 1.32E-01 |
| 710 | NA       | NA       | 5.66E+08 | 4.90E+08 | 3.96E+05 | 1.07E+06 | NA       | NA       | NA       | NA       |
| 711 | NA       | NA       | 4.95E+08 | 5.48E+08 | 3.64E+06 | 1.90E+06 | NA       | NA       | NA       | NA       |
| 712 | NA       | NA       | 6.25E+08 | 4.18E+08 | 4.14E+05 | 0.00E+00 | NA       | NA       | NA       | NA       |
| 713 | NA       | NA       | 5.85E+08 | 4.46E+08 | 2.99E+06 | 2.87E+06 | NA       | NA       | NA       | NA       |
| 714 | NA       | NA       | 4.96E+08 | 5.27E+08 | 7.17E+06 | 5.46E+06 | NA       | NA       | NA       | NA       |
| 715 | NA       | NA       | 5.04E+08 | 5.29E+08 | 2.19E+06 | 1.01E+06 | NA       | NA       | NA       | NA       |
| 716 | NA       | NA       | 5.40E+08 | 4.88E+08 | 2.15E+06 | 2.91E+06 | NA       | NA       | NA       | NA       |
| 717 | 8.05E+07 | 4.90E+06 | 5.12E+08 | 5.10E+08 | 2.53E+06 | 5.61E+06 | 1.57E-01 | 3.19E+01 | 9.61E-03 | 8.73E-01 |
| 718 | 8.05E+07 | 4.90E+06 | 5.12E+08 | 5.10E+08 | 2.53E+06 | 5.61E+06 | 1.57E-01 | 3.19E+01 | 9.61E-03 | 8.73E-01 |

|     |          |          |          |          |          |          |          |          |          |          |
|-----|----------|----------|----------|----------|----------|----------|----------|----------|----------|----------|
| 719 | 5.50E+06 | 2.52E+08 | 5.37E+08 | 4.87E+08 | 1.46E+06 | 1.11E+06 | 1.03E-02 | 3.77E+00 | 5.18E-01 | 2.26E+02 |
| 720 | 5.50E+06 | 2.52E+08 | 5.37E+08 | 4.87E+08 | 1.46E+06 | 1.11E+06 | 1.03E-02 | 3.77E+00 | 5.18E-01 | 2.26E+02 |
| 721 | NA       | NA       | 5.54E+08 | 4.60E+08 | 3.73E+06 | 2.96E+06 | NA       | NA       | NA       | NA       |
| 722 | NA       | NA       | 4.88E+08 | 5.22E+08 | 2.33E+06 | 6.79E+05 | NA       | NA       | NA       | NA       |
| 723 | 3.16E+06 | 0.00E+00 | 4.61E+08 | 5.43E+08 | 3.93E+06 | 1.58E+06 | 6.86E-03 | 8.04E-01 | 0.00E+00 | 0.00E+00 |
| 724 | NA       | NA       | 4.66E+08 | 5.42E+08 | 5.47E+05 | 4.86E+05 | NA       | NA       | NA       | NA       |
| 725 | 2.62E+06 | 0.00E+00 | 3.77E+08 | 6.22E+08 | 1.62E+06 | 8.44E+06 | 6.94E-03 | 1.61E+00 | 0.00E+00 | 0.00E+00 |
| 726 | NA       | NA       | 4.95E+08 | 4.96E+08 | 2.90E+06 | 1.32E+06 | NA       | NA       | NA       | NA       |
| 727 | NA       | NA       | 4.76E+08 | 5.10E+08 | 2.01E+06 | 1.71E+06 | NA       | NA       | NA       | NA       |
| 728 | 1.49E+06 | 0.00E+00 | 4.70E+08 | 5.16E+08 | 1.65E+06 | 9.98E+05 | 3.17E-03 | 9.01E-01 | 0.00E+00 | 0.00E+00 |
| 729 | NA       | NA       | 5.23E+08 | 4.62E+08 | 1.86E+06 | 8.57E+05 | NA       | NA       | NA       | NA       |
| 730 | NA       | NA       | 4.29E+08 | 5.52E+08 | 1.77E+06 | 1.54E+06 | NA       | NA       | NA       | NA       |
| 731 | 6.92E+06 | 0.00E+00 | 4.27E+08 | 5.47E+08 | 4.32E+06 | 2.42E+06 | 1.62E-02 | 1.60E+00 | 0.00E+00 | 0.00E+00 |
| 732 | NA       | NA       | 5.91E+08 | 3.83E+08 | 1.88E+06 | 6.00E+05 | NA       | NA       | NA       | NA       |
| 733 | NA       | NA       | 6.26E+08 | 3.40E+08 | NA       | NA       | NA       | NA       | NA       | NA       |
| 734 | NA       | NA       | 6.03E+08 | 3.52E+08 | 1.01E+06 | 2.16E+06 | NA       | NA       | NA       | NA       |
| 735 | 0.00E+00 | 1.46E+07 | 5.20E+08 | 4.31E+08 | 1.93E+06 | 1.72E+06 | 0.00E+00 | 0.00E+00 | 3.38E-02 | 8.49E+00 |
| 736 | 2.02E+06 | 0.00E+00 | 4.38E+08 | 5.02E+08 | 3.51E+06 | 3.79E+06 | 4.62E-03 | 5.75E-01 | 0.00E+00 | 0.00E+00 |
| 737 | NA       | NA       | 4.15E+08 | 5.27E+08 | 1.18E+06 | 5.34E+05 | NA       | NA       | NA       | NA       |
| 738 | NA       | NA       | 4.32E+08 | 5.07E+08 | 1.33E+06 | 1.96E+06 | NA       | NA       | NA       | NA       |
| 739 | NA       | NA       | 4.50E+08 | 4.84E+08 | 3.64E+06 | 1.39E+06 | NA       | NA       | NA       | NA       |
| 740 | 1.77E+06 | 0.00E+00 | 8.81E+07 | 8.43E+08 | 1.49E+06 | 1.15E+06 | 2.01E-02 | 1.19E+00 | 0.00E+00 | 0.00E+00 |
| 741 | 3.38E+06 | 5.27E+06 | 4.40E+08 | 4.89E+08 | 2.71E+06 | 2.66E+05 | 7.68E-03 | 1.25E+00 | 1.08E-02 | 1.99E+01 |
| 742 | 8.21E+06 | 0.00E+00 | 3.66E+08 | 5.59E+08 | 1.06E+06 | 2.79E+06 | 2.24E-02 | 7.74E+00 | 0.00E+00 | 0.00E+00 |
| 743 | 1.65E+08 | 9.05E+07 | NA       | NA       | 4.48E+08 | 4.81E+08 | NA       | 3.68E-01 | NA       | 1.88E-01 |
| 744 | 3.52E+07 | 2.17E+07 | 4.06E+08 | 5.06E+08 | 9.06E+06 | 4.29E+06 | 8.67E-02 | 3.88E+00 | 4.30E-02 | 5.07E+00 |
| 745 | NA       | NA       | 4.18E+08 | 5.06E+08 | 1.59E+06 | 0.00E+00 | NA       | NA       | NA       | NA       |
| 746 | NA       | NA       | 5.26E+08 | 3.95E+08 | 2.14E+05 | 1.33E+06 | NA       | NA       | NA       | NA       |
| 747 | 3.37E+07 | 0.00E+00 | 3.74E+08 | 5.29E+08 | 1.72E+06 | 5.08E+06 | 9.00E-02 | 1.96E+01 | 0.00E+00 | 0.00E+00 |
| 748 | NA       | NA       | 4.10E+08 | 4.98E+08 | 1.06E+06 | 4.83E+05 | NA       | NA       | NA       | NA       |
| 749 | NA       | NA       | 5.27E+08 | 3.81E+08 | 0.00E+00 | 3.34E+05 | NA       | NA       | NA       | NA       |
| 750 | 5.09E+06 | 0.00E+00 | 4.97E+08 | 3.86E+08 | 1.19E+07 | 1.20E+07 | 1.02E-02 | 4.27E-01 | 0.00E+00 | 0.00E+00 |
| 751 | NA       | NA       | 5.82E+08 | 3.15E+08 | 1.15E+06 | 1.72E+06 | NA       | NA       | NA       | NA       |
| 752 | NA       | NA       | 4.34E+08 | 4.51E+08 | 6.14E+06 | 2.77E+06 | NA       | NA       | NA       | NA       |
| 753 | NA       | NA       | 4.45E+08 | 4.45E+08 | 2.15E+06 | 1.28E+06 | NA       | NA       | NA       | NA       |
| 754 | NA       | NA       | 5.04E+08 | 3.83E+08 | 3.67E+06 | 1.58E+06 | NA       | NA       | NA       | NA       |
| 755 | NA       | NA       | 4.70E+08 | 4.17E+08 | 1.62E+06 | 1.40E+06 | NA       | NA       | NA       | NA       |
| 756 | 1.80E+06 | 2.96E+07 | 3.86E+08 | 4.99E+08 | 1.58E+06 | 1.01E+06 | 4.66E-03 | 1.14E+00 | 5.94E-02 | 2.95E+01 |

|     |          |          |          |          |          |          |          |          |          |          |
|-----|----------|----------|----------|----------|----------|----------|----------|----------|----------|----------|
| 757 | NA       | NA       | 3.82E+08 | 4.97E+08 | 1.33E+06 | 1.22E+06 | NA       | NA       | NA       | NA       |
| 758 | NA       | NA       | 4.39E+08 | 4.38E+08 | 9.92E+05 | 2.88E+06 | NA       | NA       | NA       | NA       |
| 759 | NA       | NA       | 4.47E+08 | 4.28E+08 | 1.10E+06 | 5.34E+05 | NA       | NA       | NA       | NA       |
| 760 | NA       | NA       | NA       | NA       | 5.34E+08 | 3.43E+08 | NA       | NA       | NA       | NA       |
| 761 | NA       | NA       | 5.36E+08 | 3.35E+08 | 1.64E+06 | 2.78E+06 | NA       | NA       | NA       | NA       |
| 762 | 2.42E+07 | 0.00E+00 | 3.81E+08 | 4.88E+08 | 1.30E+06 | 3.45E+06 | 6.35E-02 | 1.86E+01 | 0.00E+00 | 0.00E+00 |
| 763 | NA       | NA       | 5.02E+08 | 3.65E+08 | 1.13E+06 | 1.59E+06 | NA       | NA       | NA       | NA       |
| 764 | NA       | NA       | 4.43E+08 | 4.27E+08 | 0.00E+00 | 2.72E+05 | NA       | NA       | NA       | NA       |
| 765 | NA       | NA       | 4.31E+08 | 4.31E+08 | 0.00E+00 | 0.00E+00 | NA       | NA       | NA       | NA       |
| 766 | NA       | NA       | 4.36E+08 | 4.24E+08 | 1.19E+06 | 0.00E+00 | NA       | NA       | NA       | NA       |
| 767 | 7.16E+06 | 5.57E+06 | 3.76E+08 | 4.74E+08 | 2.82E+06 | 1.83E+06 | 1.90E-02 | 2.54E+00 | 1.18E-02 | 3.05E+00 |
| 768 | NA       | NA       | 4.28E+08 | 4.24E+08 | 1.01E+06 | 2.50E+05 | NA       | NA       | NA       | NA       |
| 769 | NA       | NA       | 4.40E+08 | 4.09E+08 | 3.85E+06 | 4.18E+05 | NA       | NA       | NA       | NA       |
| 770 | NA       | NA       | 4.39E+08 | 4.08E+08 | 3.65E+06 | 0.00E+00 | NA       | NA       | NA       | NA       |
| 771 | 5.14E+05 | 6.45E+07 | 4.57E+08 | 3.86E+08 | 2.78E+06 | 1.74E+06 | 1.13E-03 | 1.85E-01 | 1.67E-01 | 3.70E+01 |
| 772 | NA       | NA       | 4.81E+08 | 3.63E+08 | NA       | NA       | NA       | NA       | NA       | NA       |
| 773 | NA       | NA       | 4.45E+08 | 3.91E+08 | 1.67E+06 | 1.61E+06 | NA       | NA       | NA       | NA       |
| 774 | NA       | NA       | 3.82E+08 | 4.49E+08 | NA       | NA       | NA       | NA       | NA       | NA       |
| 775 | NA       | NA       | 4.17E+08 | 4.03E+08 | 5.57E+06 | 1.64E+06 | NA       | NA       | NA       | NA       |
| 776 | 1.62E+06 | 0.00E+00 | 4.49E+08 | 3.74E+08 | 2.31E+05 | 9.16E+05 | 3.61E-03 | 7.03E+00 | 0.00E+00 | 0.00E+00 |
| 777 | 8.28E+06 | 0.00E+00 | 4.60E+08 | 3.55E+08 | 1.72E+06 | 3.46E+06 | 1.80E-02 | 4.83E+00 | 0.00E+00 | 0.00E+00 |
| 778 | NA       | NA       | 4.04E+08 | 4.09E+08 | 2.52E+06 | 3.30E+06 | NA       | NA       | NA       | NA       |
| 779 | NA       | NA       | 5.08E+08 | 3.08E+08 | 1.60E+06 | 9.63E+05 | NA       | NA       | NA       | NA       |
| 780 | NA       | NA       | 4.31E+08 | 3.76E+08 | 9.06E+06 | 1.47E+06 | NA       | NA       | NA       | NA       |
| 781 | NA       | NA       | 3.72E+08 | 4.45E+08 | 5.26E+05 | 3.72E+05 | NA       | NA       | NA       | NA       |
| 782 | NA       | NA       | 3.20E+08 | 4.83E+08 | 4.59E+06 | 7.67E+06 | NA       | NA       | NA       | NA       |
| 783 | 1.79E+06 | 3.91E+06 | 4.14E+08 | 3.99E+08 | 2.87E+05 | 1.05E+06 | 4.31E-03 | 6.23E+00 | 9.79E-03 | 3.71E+00 |
| 784 | NA       | NA       | 3.99E+08 | 4.11E+08 | 1.21E+06 | 8.49E+05 | NA       | NA       | NA       | NA       |
| 785 | NA       | NA       | 4.35E+08 | 3.67E+08 | 2.36E+06 | 2.72E+06 | NA       | NA       | NA       | NA       |
| 786 | 0.00E+00 | 0.00E+00 | 3.97E+08 | 4.08E+08 | 4.51E+05 | 1.07E+06 | 0.00E+00 | 0.00E+00 | 0.00E+00 | 0.00E+00 |
| 787 | NA       | NA       | 4.48E+08 | 3.50E+08 | 3.46E+06 | 2.60E+06 | NA       | NA       | NA       | NA       |
| 788 | 2.25E+07 | 2.55E+05 | 3.86E+08 | 4.13E+08 | 1.83E+06 | 1.98E+06 | 5.82E-02 | 1.23E+01 | 6.16E-04 | 1.29E-01 |
| 789 | NA       | NA       | 4.78E+08 | 3.23E+08 | NA       | NA       | NA       | NA       | NA       | NA       |
| 790 | NA       | NA       | 4.52E+08 | 3.44E+08 | 1.08E+06 | 7.19E+05 | NA       | NA       | NA       | NA       |
| 791 | 6.72E+06 | 0.00E+00 | 4.10E+08 | 3.84E+08 | 1.10E+06 | 1.49E+06 | 1.64E-02 | 6.10E+00 | 0.00E+00 | 0.00E+00 |
| 792 | NA       | NA       | 4.11E+08 | 3.77E+08 | 3.20E+06 | 1.23E+06 | NA       | NA       | NA       | NA       |
| 793 | NA       | NA       | 4.27E+08 | 3.59E+08 | 2.81E+06 | 1.76E+06 | NA       | NA       | NA       | NA       |
| 794 | 3.81E+05 | 0.00E+00 | 4.25E+08 | 3.61E+08 | 1.54E+06 | 1.85E+05 | 8.97E-04 | 2.48E-01 | 0.00E+00 | 0.00E+00 |

|     |          |          |          |          |          |          |          |          |          |          |
|-----|----------|----------|----------|----------|----------|----------|----------|----------|----------|----------|
| 795 | NA       | NA       | 2.13E+08 | 5.67E+08 | 4.21E+06 | 2.66E+06 | NA       | NA       | NA       | NA       |
| 796 | NA       | NA       | 3.66E+08 | 4.18E+08 | 5.31E+05 | 1.26E+06 | NA       | NA       | NA       | NA       |
| 797 | NA       | NA       | 4.29E+08 | 3.48E+08 | 1.12E+06 | 0.00E+00 | NA       | NA       | NA       | NA       |
| 798 | NA       | NA       | 3.99E+08 | 3.78E+08 | 0.00E+00 | 0.00E+00 | NA       | NA       | NA       | NA       |
| 799 | 8.17E+06 | 0.00E+00 | 2.19E+08 | 5.41E+08 | 6.71E+06 | 5.77E+06 | 3.74E-02 | 1.22E+00 | 0.00E+00 | 0.00E+00 |
| 800 | NA       | NA       | 4.01E+08 | 3.67E+08 | 1.60E+06 | 1.97E+06 | NA       | NA       | NA       | NA       |
| 801 | NA       | NA       | 4.65E+08 | 3.01E+08 | 0.00E+00 | 6.16E+05 | NA       | NA       | NA       | NA       |
| 802 | NA       | NA       | 3.15E+08 | 4.51E+08 | NA       | NA       | NA       | NA       | NA       | NA       |
| 803 | NA       | NA       | 3.84E+08 | 3.78E+08 | 1.18E+06 | 1.85E+06 | NA       | NA       | NA       | NA       |
| 804 | NA       | NA       | 3.97E+08 | 3.64E+08 | 8.98E+04 | 0.00E+00 | NA       | NA       | NA       | NA       |
| 805 | 0.00E+00 | 1.21E+06 | 4.25E+08 | 3.29E+08 | 5.41E+05 | 3.18E+06 | 0.00E+00 | 0.00E+00 | 3.69E-03 | 3.81E-01 |
| 806 | NA       | NA       | 4.32E+08 | 3.22E+08 | 7.60E+05 | 4.36E+05 | NA       | NA       | NA       | NA       |
| 807 | NA       | NA       | 3.88E+08 | 3.65E+08 | 2.41E+05 | 5.55E+05 | NA       | NA       | NA       | NA       |
| 808 | 2.22E+06 | 0.00E+00 | 4.12E+08 | 3.38E+08 | 1.31E+06 | 1.40E+06 | 5.39E-03 | 1.70E+00 | 0.00E+00 | 0.00E+00 |
| 809 | NA       | NA       | 4.31E+08 | 3.19E+08 | 1.30E+06 | 0.00E+00 | NA       | NA       | NA       | NA       |
| 810 | 0.00E+00 | 1.19E+08 | 4.51E+08 | 2.97E+08 | 1.29E+06 | 1.36E+05 | 0.00E+00 | 0.00E+00 | 4.00E-01 | 8.74E+02 |
| 811 | NA       | NA       | 3.94E+08 | 3.50E+08 | 2.31E+06 | 2.87E+06 | NA       | NA       | NA       | NA       |
| 812 | NA       | NA       | 3.89E+08 | 3.58E+08 | 1.64E+06 | 7.55E+05 | NA       | NA       | NA       | NA       |
| 813 | NA       | NA       | 3.01E+08 | 4.46E+08 | 9.83E+05 | 5.08E+05 | NA       | NA       | NA       | NA       |
| 814 | NA       | NA       | 4.01E+08 | 3.44E+08 | 6.87E+05 | 6.85E+05 | NA       | NA       | NA       | NA       |
| 815 | 3.07E+06 | 0.00E+00 | 4.55E+08 | 2.88E+08 | 2.04E+06 | 7.26E+05 | 6.75E-03 | 1.51E+00 | 0.00E+00 | 0.00E+00 |
| 816 | NA       | NA       | 4.85E+08 | 2.57E+08 | 1.64E+06 | 1.09E+06 | NA       | NA       | NA       | NA       |
| 817 | NA       | NA       | 2.87E+08 | 4.56E+08 | 1.04E+06 | 1.40E+05 | NA       | NA       | NA       | NA       |
| 818 | NA       | NA       | 4.51E+08 | 2.93E+08 | 8.36E+05 | 0.00E+00 | NA       | NA       | NA       | NA       |
| 819 | NA       | NA       | 4.33E+08 | 3.08E+08 | 0.00E+00 | 3.12E+05 | NA       | NA       | NA       | NA       |
| 820 | NA       | NA       | 4.39E+08 | 3.00E+08 | 1.06E+06 | 1.31E+06 | NA       | NA       | NA       | NA       |
| 821 | 2.65E+06 | 0.00E+00 | 3.90E+08 | 3.33E+08 | 6.66E+06 | 1.08E+07 | 6.80E-03 | 3.98E-01 | 0.00E+00 | 0.00E+00 |
| 822 | NA       | NA       | 3.62E+08 | 3.77E+08 | 9.56E+05 | 5.60E+05 | NA       | NA       | NA       | NA       |
| 823 | NA       | NA       | 4.53E+08 | 2.82E+08 | 8.13E+05 | 9.29E+05 | NA       | NA       | NA       | NA       |
| 824 | NA       | NA       | 4.46E+08 | 2.91E+08 | 1.54E+05 | 0.00E+00 | NA       | NA       | NA       | NA       |
| 825 | NA       | NA       | 4.22E+08 | 3.13E+08 | 0.00E+00 | 7.01E+05 | NA       | NA       | NA       | NA       |
| 826 | 8.67E+06 | 0.00E+00 | 3.45E+08 | 3.87E+08 | 6.04E+05 | 1.79E+06 | 2.52E-02 | 1.44E+01 | 0.00E+00 | 0.00E+00 |
| 827 | NA       | NA       | 3.88E+08 | 3.42E+08 | 1.10E+06 | 1.24E+06 | NA       | NA       | NA       | NA       |
| 828 | NA       | NA       | 4.25E+08 | 3.01E+08 | 1.72E+06 | 3.43E+06 | NA       | NA       | NA       | NA       |
| 829 | NA       | NA       | 3.55E+08 | 3.75E+08 | 4.02E+05 | 7.35E+05 | NA       | NA       | NA       | NA       |
| 830 | NA       | NA       | 2.88E+08 | 4.40E+08 | 4.45E+05 | 1.46E+06 | NA       | NA       | NA       | NA       |
| 831 | 2.41E+06 | 0.00E+00 | 4.02E+08 | 3.20E+08 | 3.99E+06 | 2.50E+06 | 5.99E-03 | 6.04E-01 | 0.00E+00 | 0.00E+00 |
| 832 | NA       | NA       | 3.75E+08 | 3.46E+08 | 1.88E+06 | 2.28E+06 | NA       | NA       | NA       | NA       |

|     |          |          |          |          |          |          |          |          |          |          |
|-----|----------|----------|----------|----------|----------|----------|----------|----------|----------|----------|
| 833 | NA       | NA       | 3.42E+08 | 3.64E+08 | 6.62E+06 | 1.01E+07 | NA       | NA       | NA       | NA       |
| 834 | NA       | NA       | 3.42E+08 | 3.64E+08 | 6.62E+06 | 1.01E+07 | NA       | NA       | NA       | NA       |
| 835 | NA       | NA       | 4.26E+08 | 2.88E+08 | 3.40E+06 | 3.89E+06 | NA       | NA       | NA       | NA       |
| 836 | NA       | NA       | 3.95E+08 | 3.24E+08 | 1.27E+06 | 7.53E+05 | NA       | NA       | NA       | NA       |
| 837 | 3.06E+06 | 0.00E+00 | 4.16E+08 | 3.01E+08 | 8.66E+05 | 1.58E+06 | 7.36E-03 | 3.53E+00 | 0.00E+00 | 0.00E+00 |
| 838 | NA       | NA       | 2.22E+08 | 4.93E+08 | 7.64E+05 | 1.57E+05 | NA       | NA       | NA       | NA       |
| 839 | NA       | NA       | 4.38E+08 | 2.78E+08 | NA       | NA       | NA       | NA       | NA       | NA       |
| 840 | NA       | NA       | 3.79E+08 | 3.31E+08 | 2.87E+05 | 4.57E+05 | NA       | NA       | NA       | NA       |
| 841 | NA       | NA       | 3.96E+08 | 3.12E+08 | 1.50E+06 | 0.00E+00 | NA       | NA       | NA       | NA       |
| 842 | NA       | NA       | 3.13E+08 | 3.92E+08 | 9.04E+05 | 3.05E+06 | NA       | NA       | NA       | NA       |
| 843 | NA       | NA       | 3.57E+08 | 3.49E+08 | NA       | NA       | NA       | NA       | NA       | NA       |
| 844 | NA       | NA       | 3.62E+08 | 3.42E+08 | 0.00E+00 | 0.00E+00 | NA       | NA       | NA       | NA       |
| 845 | NA       | NA       | 3.14E+08 | 3.89E+08 | 3.09E+04 | 6.44E+05 | NA       | NA       | NA       | NA       |
| 846 | NA       | NA       | 3.59E+08 | 3.36E+08 | 8.90E+05 | 6.58E+05 | NA       | NA       | NA       | NA       |
| 847 | NA       | NA       | 3.61E+08 | 3.30E+08 | 2.44E+06 | 1.56E+06 | NA       | NA       | NA       | NA       |
| 848 | NA       | NA       | 4.26E+08 | 2.66E+08 | 1.12E+06 | 6.21E+05 | NA       | NA       | NA       | NA       |
| 849 | NA       | NA       | 4.23E+08 | 2.63E+08 | 4.58E+05 | 6.00E+05 | NA       | NA       | NA       | NA       |
| 850 | NA       | NA       | 4.23E+08 | 2.63E+08 | 4.58E+05 | 6.00E+05 | NA       | NA       | NA       | NA       |
| 851 | NA       | NA       | 3.85E+08 | 2.97E+08 | 1.29E+06 | 1.80E+05 | NA       | NA       | NA       | NA       |
| 852 | 0.00E+00 | 1.81E+06 | 3.68E+08 | 3.13E+08 | 1.08E+06 | 0.00E+00 | 0.00E+00 | 0.00E+00 | 5.77E-03 | Inf      |
| 853 | NA       | NA       | 3.62E+08 | 3.16E+08 | 1.02E+06 | 9.26E+05 | NA       | NA       | NA       | NA       |
| 854 | NA       | NA       | 4.12E+08 | 2.64E+08 | 2.21E+06 | 1.30E+06 | NA       | NA       | NA       | NA       |
| 855 | 2.07E+05 | 0.00E+00 | 3.26E+08 | 3.51E+08 | 5.52E+05 | 4.36E+05 | 6.36E-04 | 3.75E-01 | 0.00E+00 | 0.00E+00 |
| 856 | NA       | NA       | 4.13E+08 | 2.62E+08 | 1.12E+06 | 8.68E+05 | NA       | NA       | NA       | NA       |
| 857 | 0.00E+00 | 7.32E+05 | 3.15E+08 | 3.53E+08 | 2.24E+06 | 2.13E+06 | 0.00E+00 | 0.00E+00 | 2.07E-03 | 3.44E-01 |
| 858 | NA       | NA       | 3.36E+08 | 3.33E+08 | 3.98E+05 | 0.00E+00 | NA       | NA       | NA       | NA       |
| 859 | NA       | NA       | 3.40E+08 | 3.28E+08 | 1.97E+06 | 0.00E+00 | NA       | NA       | NA       | NA       |
| 860 | NA       | NA       | 3.45E+08 | 3.22E+08 | 1.67E+06 | 0.00E+00 | NA       | NA       | NA       | NA       |
| 861 | NA       | NA       | 3.36E+08 | 3.25E+08 | 3.71E+06 | 1.56E+06 | NA       | NA       | NA       | NA       |
| 862 | NA       | NA       | 3.52E+08 | 3.07E+08 | 1.56E+06 | 1.43E+06 | NA       | NA       | NA       | NA       |
| 863 | NA       | NA       | 3.86E+08 | 2.72E+08 | 1.33E+06 | 1.51E+06 | NA       | NA       | NA       | NA       |
| 864 | NA       | NA       | 3.19E+08 | 3.37E+08 | 1.15E+06 | 7.21E+05 | NA       | NA       | NA       | NA       |
| 865 | 0.00E+00 | 1.64E+07 | 3.58E+08 | 2.97E+08 | 1.41E+06 | 3.87E+05 | 0.00E+00 | 0.00E+00 | 5.53E-02 | 4.25E+01 |
| 866 | NA       | NA       | 4.12E+08 | 2.42E+08 | 1.41E+06 | 0.00E+00 | NA       | NA       | NA       | NA       |
| 867 | NA       | NA       | 3.11E+08 | 3.43E+08 | 8.51E+05 | 0.00E+00 | NA       | NA       | NA       | NA       |
| 868 | NA       | NA       | 3.17E+08 | 3.35E+08 | 1.37E+06 | 0.00E+00 | NA       | NA       | NA       | NA       |
| 869 | NA       | NA       | 3.11E+08 | 3.37E+08 | 1.15E+06 | 1.00E+06 | NA       | NA       | NA       | NA       |
| 870 | 0.00E+00 | 2.79E+06 | 3.74E+08 | 2.69E+08 | 1.88E+06 | 1.08E+06 | 0.00E+00 | 0.00E+00 | 1.04E-02 | 2.60E+00 |

|     |          |          |          |          |          |          |          |          |          |          |
|-----|----------|----------|----------|----------|----------|----------|----------|----------|----------|----------|
| 871 | NA       | NA       | 3.48E+08 | 2.94E+08 | 6.75E+05 | 1.41E+06 | NA       | NA       | NA       | NA       |
| 872 | 4.40E+06 | 0.00E+00 | 3.31E+08 | 3.07E+08 | 3.62E+06 | 2.02E+06 | 1.33E-02 | 1.21E+00 | 0.00E+00 | 0.00E+00 |
| 873 | 3.45E+06 | 2.23E+06 | 2.44E+08 | 3.91E+08 | 2.41E+06 | 1.78E+06 | 1.41E-02 | 1.43E+00 | 5.70E-03 | 1.25E+00 |
| 874 | NA       | NA       | 3.11E+08 | 3.20E+08 | 4.52E+06 | 3.97E+06 | NA       | NA       | NA       | NA       |
| 875 | NA       | NA       | 3.41E+08 | 2.97E+08 | 4.94E+05 | 0.00E+00 | NA       | NA       | NA       | NA       |
| 876 | NA       | NA       | 3.47E+08 | 2.88E+08 | 1.00E+06 | 2.23E+06 | NA       | NA       | NA       | NA       |
| 877 | NA       | NA       | 3.97E+08 | 2.38E+08 | 9.67E+05 | 5.18E+05 | NA       | NA       | NA       | NA       |
| 878 | NA       | NA       | 3.57E+08 | 2.71E+08 | 5.14E+05 | 0.00E+00 | NA       | NA       | NA       | NA       |
| 879 | 2.33E+06 | 9.74E+05 | 2.83E+08 | 3.40E+08 | 1.31E+06 | 2.23E+06 | 8.24E-03 | 1.78E+00 | 2.87E-03 | 4.37E-01 |
| 880 | NA       | NA       | 3.82E+08 | 2.40E+08 | 1.18E+06 | 1.55E+06 | NA       | NA       | NA       | NA       |
| 881 | NA       | NA       | 3.05E+08 | 3.18E+08 | 8.32E+05 | 6.09E+05 | NA       | NA       | NA       | NA       |
| 882 | 0.00E+00 | 5.96E+05 | 3.63E+08 | 2.54E+08 | 2.23E+06 | 4.14E+05 | 0.00E+00 | 0.00E+00 | 2.35E-03 | 1.44E+00 |
| 883 | NA       | NA       | 4.05E+08 | 2.13E+08 | 0.00E+00 | 2.30E+05 | NA       | NA       | NA       | NA       |
| 884 | NA       | NA       | 3.28E+08 | 2.88E+08 | 1.63E+06 | 4.51E+05 | NA       | NA       | NA       | NA       |
| 885 | NA       | NA       | 3.19E+08 | 2.95E+08 | 1.35E+06 | 1.54E+06 | NA       | NA       | NA       | NA       |
| 886 | NA       | NA       | 2.63E+08 | 3.45E+08 | 4.67E+06 | 2.17E+06 | NA       | NA       | NA       | NA       |
| 887 | NA       | NA       | 3.05E+08 | 3.07E+08 | 8.23E+04 | 1.21E+05 | NA       | NA       | NA       | NA       |
| 888 | NA       | NA       | 3.96E+08 | 2.13E+08 | 1.48E+06 | 1.19E+06 | NA       | NA       | NA       | NA       |
| 889 | 1.12E+05 | 3.42E+07 | 3.19E+08 | 2.87E+08 | 1.32E+06 | 1.22E+06 | 3.51E-04 | 8.45E-02 | 1.19E-01 | 2.81E+01 |
| 890 | NA       | NA       | 3.19E+08 | 2.88E+08 | NA       | NA       | NA       | NA       | NA       | NA       |
| 891 | NA       | NA       | 3.23E+08 | 2.78E+08 | 1.48E+06 | 9.87E+05 | NA       | NA       | NA       | NA       |
| 892 | NA       | NA       | 2.60E+08 | 3.43E+08 | NA       | NA       | NA       | NA       | NA       | NA       |
| 893 | NA       | NA       | 2.19E+08 | 3.81E+08 | NA       | NA       | NA       | NA       | NA       | NA       |
| 894 | NA       | NA       | 2.45E+08 | 3.47E+08 | 4.33E+06 | 3.87E+06 | NA       | NA       | NA       | NA       |
| 895 | NA       | NA       | 3.06E+08 | 2.90E+08 | 2.13E+06 | 7.17E+05 | NA       | NA       | NA       | NA       |
| 896 | 3.37E+06 | 0.00E+00 | 3.19E+08 | 2.77E+08 | 1.84E+06 | 8.23E+05 | 1.06E-02 | 1.83E+00 | 0.00E+00 | 0.00E+00 |
| 897 | NA       | NA       | 2.81E+08 | 3.15E+08 | 2.39E+06 | 0.00E+00 | NA       | NA       | NA       | NA       |
| 898 | NA       | NA       | 3.10E+08 | 2.87E+08 | 7.01E+05 | 5.25E+05 | NA       | NA       | NA       | NA       |
| 899 | NA       | NA       | 3.47E+08 | 2.49E+08 | 4.91E+05 | 3.00E+05 | NA       | NA       | NA       | NA       |
| 900 | NA       | NA       | 3.05E+08 | 2.91E+08 | 2.12E+05 | 5.02E+05 | NA       | NA       | NA       | NA       |
| 901 | NA       | NA       | 3.74E+08 | 2.21E+08 | 6.87E+05 | 1.18E+05 | NA       | NA       | NA       | NA       |
| 902 | NA       | NA       | 2.89E+08 | 3.06E+08 | 7.80E+05 | 0.00E+00 | NA       | NA       | NA       | NA       |
| 903 | 4.50E+05 | 0.00E+00 | 2.96E+08 | 2.95E+08 | 1.71E+06 | 2.23E+06 | 1.52E-03 | 2.63E-01 | 0.00E+00 | 0.00E+00 |
| 904 | NA       | NA       | 3.17E+08 | 2.75E+08 | 1.67E+05 | 1.47E+05 | NA       | NA       | NA       | NA       |
| 905 | 8.80E+07 | 2.67E+06 | 2.55E+08 | 3.28E+08 | 2.16E+06 | 5.59E+06 | 3.46E-01 | 4.08E+01 | 8.14E-03 | 4.78E-01 |
| 906 | NA       | NA       | 2.48E+08 | 3.37E+08 | 1.92E+06 | 6.07E+05 | NA       | NA       | NA       | NA       |
| 907 | NA       | NA       | 2.53E+08 | 3.32E+08 | 7.39E+05 | 1.51E+06 | NA       | NA       | NA       | NA       |
| 908 | NA       | NA       | 2.96E+08 | 2.91E+08 | 1.53E+05 | 2.09E+05 | NA       | NA       | NA       | NA       |



|     |          |          |          |          |          |          |          |          |          |          |
|-----|----------|----------|----------|----------|----------|----------|----------|----------|----------|----------|
| 909 | NA       | NA       | 3.38E+08 | 2.47E+08 | 1.03E+06 | 7.70E+05 | NA       | NA       | NA       | NA       |
| 910 | NA       | NA       | 3.39E+08 | 2.45E+08 | 1.91E+05 | 1.39E+06 | NA       | NA       | NA       | NA       |
| 911 | NA       | NA       | 3.30E+08 | 2.49E+08 | 2.29E+06 | 2.11E+06 | NA       | NA       | NA       | NA       |
| 912 | NA       | NA       | 2.83E+08 | 3.00E+08 | 2.57E+05 | 0.00E+00 | NA       | NA       | NA       | NA       |
| 913 | 6.26E+06 | 0.00E+00 | 4.80E+07 | 5.32E+08 | 0.00E+00 | 1.50E+05 | 1.30E-01 | Inf      | 0.00E+00 | 0.00E+00 |
| 914 | NA       | NA       | 2.76E+08 | 3.00E+08 | 6.16E+05 | 6.27E+05 | NA       | NA       | NA       | NA       |
| 915 | 4.48E+07 | 1.47E+07 | NA       | NA       | 2.83E+08 | 2.93E+08 | NA       | 1.58E-01 | NA       | 5.00E-02 |
| 916 | NA       | NA       | 2.32E+08 | 3.43E+08 | 3.15E+05 | 0.00E+00 | NA       | NA       | NA       | NA       |
| 917 | NA       | NA       | 2.98E+08 | 2.72E+08 | 1.24E+06 | 8.95E+05 | NA       | NA       | NA       | NA       |
| 918 | NA       | NA       | 3.19E+08 | 2.48E+08 | 1.60E+06 | 9.95E+05 | NA       | NA       | NA       | NA       |
| 919 | 5.32E+05 | 0.00E+00 | 4.76E+08 | 9.19E+07 | 6.46E+05 | 0.00E+00 | 1.12E-03 | 8.23E-01 | 0.00E+00 | NA       |
| 920 | 0.00E+00 | 5.39E+06 | 3.09E+08 | 2.58E+08 | 8.65E+05 | 0.00E+00 | 0.00E+00 | 0.00E+00 | 2.09E-02 | Inf      |
| 921 | NA       | NA       | 3.05E+08 | 2.55E+08 | 2.90E+06 | 2.08E+06 | NA       | NA       | NA       | NA       |
| 922 | 2.98E+07 | 0.00E+00 | 3.43E+08 | 2.12E+08 | 3.26E+06 | 5.50E+06 | 8.69E-02 | 9.15E+00 | 0.00E+00 | 0.00E+00 |
| 923 | NA       | NA       | 2.84E+08 | 2.75E+08 | 8.21E+05 | 1.22E+06 | NA       | NA       | NA       | NA       |
| 924 | NA       | NA       | 2.76E+08 | 2.84E+08 | 6.44E+05 | 5.38E+05 | NA       | NA       | NA       | NA       |
| 925 | NA       | NA       | 2.77E+08 | 2.76E+08 | 4.37E+06 | 2.16E+06 | NA       | NA       | NA       | NA       |
| 926 | NA       | NA       | 3.22E+08 | 2.37E+08 | 1.83E+05 | 3.26E+05 | NA       | NA       | NA       | NA       |
| 927 | NA       | NA       | 1.97E+08 | 3.55E+08 | 2.96E+06 | 1.92E+06 | NA       | NA       | NA       | NA       |
| 928 | NA       | NA       | 3.05E+08 | 2.49E+08 | NA       | NA       | NA       | NA       | NA       | NA       |
| 929 | NA       | NA       | 3.02E+08 | 2.50E+08 | 4.99E+05 | 1.99E+06 | NA       | NA       | NA       | NA       |
| 930 | NA       | NA       | 2.93E+08 | 2.57E+08 | 2.87E+06 | 1.59E+06 | NA       | NA       | NA       | NA       |
| 931 | NA       | NA       | 2.82E+08 | 2.71E+08 | 1.25E+06 | 0.00E+00 | NA       | NA       | NA       | NA       |
| 932 | 0.00E+00 | 3.70E+07 | 2.92E+08 | 2.54E+08 | 2.94E+06 | 1.32E+06 | 0.00E+00 | 0.00E+00 | 1.46E-01 | 2.81E+01 |
| 933 | 6.77E+06 | 9.96E+06 | 2.48E+08 | 2.97E+08 | 3.27E+06 | 1.63E+06 | 2.73E-02 | 2.07E+00 | 3.36E-02 | 6.09E+00 |
| 934 | NA       | NA       | 2.68E+08 | 2.80E+08 | 1.52E+06 | 0.00E+00 | NA       | NA       | NA       | NA       |
| 935 | NA       | NA       | 3.19E+08 | 2.28E+08 | 7.51E+05 | 8.56E+04 | NA       | NA       | NA       | NA       |
| 936 | NA       | NA       | 3.00E+08 | 2.46E+08 | 1.64E+06 | 2.67E+05 | NA       | NA       | NA       | NA       |
| 937 | 2.28E+06 | 0.00E+00 | 2.89E+08 | 2.57E+08 | 1.57E+06 | 1.13E+05 | 7.87E-03 | 1.45E+00 | 0.00E+00 | 0.00E+00 |
| 938 | NA       | NA       | 2.21E+08 | 3.18E+08 | 3.36E+06 | 7.92E+05 | NA       | NA       | NA       | NA       |
| 939 | NA       | NA       | 2.86E+08 | 2.55E+08 | 2.15E+06 | 0.00E+00 | NA       | NA       | NA       | NA       |
| 940 | NA       | NA       | 2.85E+08 | 2.48E+08 | 1.58E+06 | 2.47E+06 | NA       | NA       | NA       | NA       |
| 941 | NA       | NA       | 3.43E+08 | 1.80E+08 | 7.11E+06 | 6.10E+06 | NA       | NA       | NA       | NA       |
| 942 | 0.00E+00 | 5.15E+05 | 3.27E+08 | 2.07E+08 | 3.75E+05 | 1.03E+06 | 0.00E+00 | 0.00E+00 | 2.49E-03 | 4.99E-01 |
| 943 | 2.43E+07 | 1.36E+07 | 2.03E+08 | 3.26E+08 | 2.70E+06 | 1.52E+06 | 1.20E-01 | 9.01E+00 | 4.17E-02 | 8.93E+00 |
| 944 | 7.48E+05 | 2.71E+06 | 2.60E+08 | 2.68E+08 | 2.06E+06 | 2.72E+06 | 2.87E-03 | 3.63E-01 | 1.01E-02 | 9.98E-01 |
| 945 | NA       | NA       | 2.52E+08 | 2.81E+08 | 9.01E+05 | 0.00E+00 | NA       | NA       | NA       | NA       |
| 946 | NA       | NA       | 2.77E+08 | 2.53E+08 | 1.42E+06 | 2.11E+05 | NA       | NA       | NA       | NA       |

|     |          |          |          |          |          |          |          |          |          |          |
|-----|----------|----------|----------|----------|----------|----------|----------|----------|----------|----------|
| 947 | 1.49E+07 | 6.74E+06 | 3.18E+08 | 2.11E+08 | 1.64E+06 | 1.21E+06 | 4.68E-02 | 9.08E+00 | 3.20E-02 | 5.56E+00 |
| 948 | NA       | NA       | 3.23E+08 | 2.02E+08 | 1.89E+06 | 6.99E+05 | NA       | NA       | NA       | NA       |
| 949 | NA       | NA       | 2.29E+08 | 2.97E+08 | 3.12E+05 | 2.83E+05 | NA       | NA       | NA       | NA       |
| 950 | NA       | NA       | 2.13E+08 | 3.12E+08 | 8.59E+05 | 7.28E+05 | NA       | NA       | NA       | NA       |
| 951 | 0.00E+00 | 6.01E+06 | 2.91E+08 | 2.33E+08 | 7.53E+05 | 0.00E+00 | 0.00E+00 | 0.00E+00 | 2.58E-02 | Inf      |
| 952 | 1.36E+07 | 5.37E+05 | 2.75E+08 | 2.44E+08 | 2.05E+06 | 1.23E+06 | 4.94E-02 | 6.63E+00 | 2.20E-03 | 4.36E-01 |
| 953 | 2.08E+06 | 0.00E+00 | 2.50E+08 | 2.64E+08 | 1.93E+06 | 2.18E+05 | 8.33E-03 | 1.08E+00 | 0.00E+00 | 0.00E+00 |
| 954 | NA       | NA       | 2.65E+08 | 2.48E+08 | NA       | NA       | NA       | NA       | NA       | NA       |
| 955 | 1.05E+06 | 0.00E+00 | 2.49E+08 | 2.59E+08 | 7.06E+05 | 2.09E+06 | 4.20E-03 | 1.48E+00 | 0.00E+00 | 0.00E+00 |
| 956 | NA       | NA       | 2.47E+08 | 2.54E+08 | 3.03E+06 | 3.68E+06 | NA       | NA       | NA       | NA       |
| 957 | NA       | NA       | 2.21E+08 | 2.84E+08 | 8.28E+05 | 4.43E+05 | NA       | NA       | NA       | NA       |
| 958 | NA       | NA       | 2.51E+08 | 2.46E+08 | 6.18E+06 | 2.50E+06 | NA       | NA       | NA       | NA       |
| 959 | NA       | NA       | 2.70E+08 | 2.35E+08 | 0.00E+00 | 0.00E+00 | NA       | NA       | NA       | NA       |
| 960 | 3.06E+06 | 2.79E+05 | 2.82E+08 | 2.16E+08 | 4.54E+06 | 1.89E+06 | 1.08E-02 | 6.74E-01 | 1.29E-03 | 1.48E-01 |
| 961 | NA       | NA       | 2.72E+08 | 2.26E+08 | 4.50E+05 | 3.76E+05 | NA       | NA       | NA       | NA       |
| 962 | 3.53E+05 | 0.00E+00 | 2.69E+08 | 2.26E+08 | 3.76E+05 | 1.52E+06 | 1.31E-03 | 9.38E-01 | 0.00E+00 | 0.00E+00 |
| 963 | NA       | NA       | 2.53E+08 | 2.34E+08 | 1.30E+06 | 3.11E+06 | NA       | NA       | NA       | NA       |
| 964 | 4.50E+06 | 0.00E+00 | 2.48E+08 | 2.41E+08 | 3.33E+06 | 0.00E+00 | 1.82E-02 | 1.35E+00 | 0.00E+00 | NA       |
| 965 | NA       | NA       | 2.77E+08 | 2.02E+08 | 3.99E+06 | 4.07E+06 | NA       | NA       | NA       | NA       |
| 966 | NA       | NA       | 2.49E+08 | 2.37E+08 | 4.89E+05 | 4.66E+05 | NA       | NA       | NA       | NA       |
| 967 | NA       | NA       | 2.93E+08 | 1.89E+08 | 2.61E+06 | 2.08E+06 | NA       | NA       | NA       | NA       |
| 968 | NA       | NA       | 2.62E+08 | 2.23E+08 | 3.27E+05 | 9.93E+05 | NA       | NA       | NA       | NA       |
| 969 | NA       | NA       | 2.48E+08 | 2.34E+08 | 1.40E+06 | 7.69E+04 | NA       | NA       | NA       | NA       |
| 970 | 1.36E+06 | 1.82E+06 | 2.57E+08 | 2.24E+08 | 1.19E+06 | 9.75E+05 | 5.30E-03 | 1.14E+00 | 8.09E-03 | 1.86E+00 |
| 971 | NA       | NA       | 2.71E+08 | 2.10E+08 | NA       | NA       | NA       | NA       | NA       | NA       |
| 972 | NA       | NA       | 2.60E+08 | 2.20E+08 | 1.38E+06 | 0.00E+00 | NA       | NA       | NA       | NA       |
| 973 | NA       | NA       | 2.58E+08 | 2.11E+08 | 4.36E+06 | 5.90E+06 | NA       | NA       | NA       | NA       |
| 974 | 3.90E+06 | 3.17E+06 | 2.43E+08 | 2.30E+08 | 4.11E+06 | 1.99E+06 | 1.61E-02 | 9.49E-01 | 1.38E-02 | 1.59E+00 |
| 975 | NA       | NA       | 2.67E+08 | 2.10E+08 | 0.00E+00 | 1.64E+06 | NA       | NA       | NA       | NA       |
| 976 | NA       | NA       | 2.55E+08 | 2.19E+08 | 8.70E+05 | 1.26E+06 | NA       | NA       | NA       | NA       |
| 977 | 7.79E+06 | 1.10E+07 | 1.54E+08 | 3.18E+08 | 3.19E+06 | 1.33E+06 | 5.07E-02 | 2.44E+00 | 3.45E-02 | 8.22E+00 |
| 978 | NA       | NA       | 2.71E+08 | 2.00E+08 | 1.68E+06 | 8.74E+05 | NA       | NA       | NA       | NA       |
| 979 | NA       | NA       | 2.42E+08 | 2.20E+08 | 4.48E+06 | 3.12E+06 | NA       | NA       | NA       | NA       |
| 980 | NA       | NA       | 2.10E+08 | 2.57E+08 | 8.49E+05 | 7.15E+05 | NA       | NA       | NA       | NA       |
| 981 | NA       | NA       | 2.38E+08 | 2.31E+08 | NA       | NA       | NA       | NA       | NA       | NA       |
| 982 | NA       | NA       | 2.52E+08 | 2.16E+08 | 0.00E+00 | 0.00E+00 | NA       | NA       | NA       | NA       |
| 983 | NA       | NA       | 2.14E+08 | 2.49E+08 | 1.10E+06 | 9.94E+05 | NA       | NA       | NA       | NA       |
| 984 | NA       | NA       | 2.40E+08 | 2.24E+08 | 0.00E+00 | 0.00E+00 | NA       | NA       | NA       | NA       |

|      |          |          |          |          |          |          |          |          |          |          |
|------|----------|----------|----------|----------|----------|----------|----------|----------|----------|----------|
| 985  | NA       | NA       | 2.53E+08 | 2.08E+08 | 8.39E+05 | 0.00E+00 | NA       | NA       | NA       | NA       |
| 986  | 1.18E+07 | 8.46E+06 | 2.28E+08 | 2.33E+08 | 8.97E+05 | 8.61E+04 | 5.16E-02 | 1.31E+01 | 3.63E-02 | 9.83E+01 |
| 987  | 3.11E+05 | 0.00E+00 | 2.30E+08 | 2.23E+08 | 1.95E+06 | 2.65E+05 | 1.35E-03 | 1.60E-01 | 0.00E+00 | 0.00E+00 |
| 988  | NA       | NA       | 2.84E+08 | 1.71E+08 | 2.23E+05 | 3.32E+05 | NA       | NA       | NA       | NA       |
| 989  | NA       | NA       | 2.66E+08 | 1.85E+08 | 9.66E+05 | 1.74E+06 | NA       | NA       | NA       | NA       |
| 990  | NA       | NA       | 1.74E+08 | 2.76E+08 | 2.34E+06 | 0.00E+00 | NA       | NA       | NA       | NA       |
| 991  | 9.10E+07 | 5.30E+06 | 2.19E+08 | 2.28E+08 | 3.43E+05 | 4.64E+06 | 4.16E-01 | 2.65E+02 | 2.32E-02 | 1.14E+00 |
| 992  | NA       | NA       | 2.44E+08 | 2.06E+08 | 1.29E+06 | 2.16E+05 | NA       | NA       | NA       | NA       |
| 993  | NA       | NA       | 2.07E+08 | 2.40E+08 | 2.45E+06 | 9.59E+05 | NA       | NA       | NA       | NA       |
| 994  | NA       | NA       | 2.51E+08 | 1.98E+08 | 1.47E+05 | 9.30E+04 | NA       | NA       | NA       | NA       |
| 995  | NA       | NA       | 2.61E+08 | 1.85E+08 | 0.00E+00 | 3.01E+06 | NA       | NA       | NA       | NA       |
| 996  | NA       | NA       | 2.51E+08 | 1.98E+08 | NA       | NA       | NA       | NA       | NA       | NA       |
| 997  | NA       | NA       | 2.12E+08 | 2.34E+08 | 0.00E+00 | 7.23E+05 | NA       | NA       | NA       | NA       |
| 998  | NA       | NA       | 2.40E+08 | 1.99E+08 | 1.52E+06 | 8.61E+05 | NA       | NA       | NA       | NA       |
| 999  | NA       | NA       | 2.29E+08 | 2.11E+08 | 9.47E+05 | 1.05E+06 | NA       | NA       | NA       | NA       |
| 1000 | NA       | NA       | 2.64E+08 | 1.76E+08 | 6.34E+05 | 6.11E+05 | NA       | NA       | NA       | NA       |
| 1001 | NA       | NA       | 2.31E+08 | 2.10E+08 | 0.00E+00 | 1.35E+05 | NA       | NA       | NA       | NA       |
| 1002 | NA       | NA       | 2.43E+08 | 1.93E+08 | 2.04E+06 | 1.26E+06 | NA       | NA       | NA       | NA       |
| 1003 | NA       | NA       | 2.53E+08 | 1.86E+08 | 0.00E+00 | 6.25E+05 | NA       | NA       | NA       | NA       |
| 1004 | NA       | NA       | 2.00E+08 | 2.33E+08 | 1.20E+06 | 5.51E+05 | NA       | NA       | NA       | NA       |
| 1005 | NA       | NA       | 2.82E+08 | 1.53E+08 | NA       | NA       | NA       | NA       | NA       | NA       |
| 1006 | 3.24E+06 | 0.00E+00 | 2.45E+08 | 1.86E+08 | 7.44E+05 | 0.00E+00 | 1.33E-02 | 4.36E+00 | 0.00E+00 | NA       |
| 1007 | 2.97E+05 | 1.12E+06 | 2.07E+08 | 2.18E+08 | 2.46E+06 | 9.02E+05 | 1.44E-03 | 1.21E-01 | 5.14E-03 | 1.25E+00 |
| 1008 | NA       | NA       | 1.72E+08 | 2.55E+08 | 7.51E+05 | 2.81E+05 | NA       | NA       | NA       | NA       |
| 1009 | NA       | NA       | 1.80E+08 | 2.48E+08 | 3.66E+05 | 0.00E+00 | NA       | NA       | NA       | NA       |
| 1010 | NA       | NA       | 2.29E+08 | 1.94E+08 | 1.02E+06 | 1.35E+06 | NA       | NA       | NA       | NA       |
| 1011 | NA       | NA       | 2.04E+08 | 2.19E+08 | 1.70E+06 | 0.00E+00 | NA       | NA       | NA       | NA       |
| 1012 | NA       | NA       | 2.64E+08 | 1.58E+08 | NA       | NA       | NA       | NA       | NA       | NA       |
| 1013 | NA       | NA       | 1.87E+08 | 2.33E+08 | 2.27E+05 | 4.71E+05 | NA       | NA       | NA       | NA       |
| 1014 | NA       | NA       | 2.03E+08 | 2.17E+08 | NA       | NA       | NA       | NA       | NA       | NA       |
| 1015 | NA       | NA       | 2.09E+08 | 2.07E+08 | 3.59E+05 | 3.73E+05 | NA       | NA       | NA       | NA       |
| 1016 | NA       | NA       | 2.36E+08 | 1.78E+08 | 0.00E+00 | 1.77E+05 | NA       | NA       | NA       | NA       |
| 1017 | NA       | NA       | 2.51E+08 | 1.62E+08 | 5.04E+05 | 0.00E+00 | NA       | NA       | NA       | NA       |
| 1018 | NA       | NA       | 2.06E+08 | 2.06E+08 | 1.06E+06 | 3.44E+05 | NA       | NA       | NA       | NA       |
| 1019 | 9.01E+05 | 0.00E+00 | 2.71E+08 | 1.40E+08 | 5.95E+05 | 1.10E+06 | 3.32E-03 | 1.51E+00 | 0.00E+00 | 0.00E+00 |
| 1020 | NA       | NA       | 2.61E+08 | 1.51E+08 | NA       | NA       | NA       | NA       | NA       | NA       |
| 1021 | NA       | NA       | 2.50E+08 | 1.62E+08 | NA       | NA       | NA       | NA       | NA       | NA       |
| 1022 | NA       | NA       | 2.30E+08 | 1.80E+08 | 5.49E+05 | 5.09E+05 | NA       | NA       | NA       | NA       |

|      |          |          |          |          |          |          |          |          |          |          |
|------|----------|----------|----------|----------|----------|----------|----------|----------|----------|----------|
| 1023 | NA       | NA       | 2.07E+08 | 1.98E+08 | 2.02E+06 | 3.74E+05 | NA       | NA       | NA       | NA       |
| 1024 | NA       | NA       | 2.24E+08 | 1.83E+08 | 0.00E+00 | 0.00E+00 | NA       | NA       | NA       | NA       |
| 1025 | NA       | NA       | 2.06E+08 | 1.97E+08 | 1.61E+06 | 1.38E+06 | NA       | NA       | NA       | NA       |
| 1026 | NA       | NA       | 2.18E+08 | 1.83E+08 | 2.79E+06 | 6.96E+05 | NA       | NA       | NA       | NA       |
| 1027 | NA       | NA       | 1.97E+08 | 2.06E+08 | 0.00E+00 | 1.07E+05 | NA       | NA       | NA       | NA       |
| 1028 | NA       | NA       | 2.24E+08 | 1.78E+08 | 0.00E+00 | 2.66E+05 | NA       | NA       | NA       | NA       |
| 1029 | NA       | NA       | 1.87E+08 | 2.13E+08 | 0.00E+00 | 0.00E+00 | NA       | NA       | NA       | NA       |
| 1030 | 6.84E+06 | 1.04E+06 | 2.00E+08 | 1.98E+08 | 1.33E+06 | 8.97E+05 | 3.42E-02 | 5.15E+00 | 5.27E-03 | 1.16E+00 |
| 1031 | NA       | NA       | 2.00E+08 | 1.98E+08 | 7.83E+05 | 0.00E+00 | NA       | NA       | NA       | NA       |
| 1032 | NA       | NA       | 1.87E+08 | 2.06E+08 | 3.41E+06 | 1.45E+06 | NA       | NA       | NA       | NA       |
| 1033 | NA       | NA       | 2.04E+08 | 1.93E+08 | 8.18E+05 | 9.16E+04 | NA       | NA       | NA       | NA       |
| 1034 | NA       | NA       | 2.19E+08 | 1.76E+08 | 8.48E+05 | 2.78E+05 | NA       | NA       | NA       | NA       |
| 1035 | 0.00E+00 | 7.84E+07 | 2.64E+08 | 1.32E+08 | 0.00E+00 | 0.00E+00 | 0.00E+00 | NA       | 5.94E-01 | Inf      |
| 1036 | 2.96E+06 | 9.49E+06 | 1.98E+08 | 1.91E+08 | 1.29E+06 | 9.07E+05 | 1.49E-02 | 2.29E+00 | 4.97E-02 | 1.05E+01 |
| 1037 | NA       | NA       | 2.24E+08 | 1.66E+08 | 4.96E+05 | 0.00E+00 | NA       | NA       | NA       | NA       |
| 1038 | NA       | NA       | 1.80E+08 | 2.06E+08 | 9.81E+05 | 3.16E+06 | NA       | NA       | NA       | NA       |
| 1039 | 3.90E+06 | 0.00E+00 | 2.25E+08 | 1.61E+08 | 9.34E+05 | 1.99E+06 | 1.73E-02 | 4.18E+00 | 0.00E+00 | 0.00E+00 |
| 1040 | NA       | NA       | 2.03E+08 | 1.85E+08 | 0.00E+00 | 7.74E+05 | NA       | NA       | NA       | NA       |
| 1041 | 1.23E+08 | 1.77E+08 | 1.92E+08 | 1.87E+08 | 2.46E+06 | 3.40E+06 | 6.42E-01 | 5.02E+01 | 9.49E-01 | 5.22E+01 |
| 1042 | NA       | NA       | 1.68E+08 | 2.14E+08 | 1.38E+06 | 9.75E+05 | NA       | NA       | NA       | NA       |
| 1043 | NA       | NA       | 2.02E+08 | 1.80E+08 | 0.00E+00 | 2.10E+05 | NA       | NA       | NA       | NA       |
| 1044 | 1.28E+07 | 0.00E+00 | 1.66E+08 | 2.09E+08 | 2.52E+06 | 2.84E+06 | 7.70E-02 | 5.06E+00 | 0.00E+00 | 0.00E+00 |
| 1045 | NA       | NA       | 1.92E+08 | 1.86E+08 | 9.06E+05 | 7.85E+05 | NA       | NA       | NA       | NA       |
| 1046 | 0.00E+00 | 6.62E+05 | 1.58E+08 | 2.20E+08 | 8.12E+05 | 4.44E+05 | 0.00E+00 | 0.00E+00 | 3.01E-03 | 1.49E+00 |
| 1047 | NA       | NA       | 2.55E+08 | 1.20E+08 | 1.10E+06 | 0.00E+00 | NA       | NA       | NA       | NA       |
| 1048 | NA       | NA       | 1.91E+08 | 1.84E+08 | 0.00E+00 | 0.00E+00 | NA       | NA       | NA       | NA       |
| 1049 | NA       | NA       | 1.61E+08 | 2.11E+08 | 1.77E+06 | 1.30E+06 | NA       | NA       | NA       | NA       |
| 1050 | NA       | NA       | 1.78E+08 | 1.94E+08 | 1.55E+06 | 2.01E+05 | NA       | NA       | NA       | NA       |
| 1051 | NA       | NA       | 1.72E+08 | 2.00E+08 | 4.97E+05 | 4.08E+05 | NA       | NA       | NA       | NA       |
| 1052 | NA       | NA       | 1.62E+08 | 2.01E+08 | 1.60E+06 | 6.38E+06 | NA       | NA       | NA       | NA       |
| 1053 | NA       | NA       | 1.77E+08 | 1.90E+08 | 3.20E+06 | 1.62E+06 | NA       | NA       | NA       | NA       |
| 1054 | NA       | NA       | 1.64E+08 | 2.04E+08 | 2.26E+06 | 1.31E+05 | NA       | NA       | NA       | NA       |
| 1055 | 0.00E+00 | 0.00E+00 | 2.28E+08 | 1.37E+08 | 2.55E+06 | 2.11E+06 | 0.00E+00 | 0.00E+00 | 0.00E+00 | 0.00E+00 |
| 1056 | NA       | NA       | 2.39E+08 | 1.30E+08 | 0.00E+00 | 0.00E+00 | NA       | NA       | NA       | NA       |
| 1057 | NA       | NA       | 1.59E+08 | 2.07E+08 | 2.30E+06 | 3.68E+05 | NA       | NA       | NA       | NA       |
| 1058 | NA       | NA       | 1.72E+08 | 1.97E+08 | 0.00E+00 | 2.46E+05 | NA       | NA       | NA       | NA       |
| 1059 | 2.90E+05 | 0.00E+00 | 1.56E+08 | 2.10E+08 | 1.42E+05 | 1.25E+06 | 1.86E-03 | 2.04E+00 | 0.00E+00 | 0.00E+00 |
| 1060 | NA       | NA       | 1.97E+08 | 1.69E+08 | 9.93E+05 | 4.17E+05 | NA       | NA       | NA       | NA       |

|      |          |          |          |          |          |          |          |          |          |          |
|------|----------|----------|----------|----------|----------|----------|----------|----------|----------|----------|
| 1061 | 2.02E+06 | 0.00E+00 | 2.12E+08 | 1.55E+08 | 0.00E+00 | 0.00E+00 | 9.55E-03 | Inf      | 0.00E+00 | NA       |
| 1062 | 2.57E+05 | 0.00E+00 | 2.42E+08 | 1.21E+08 | 1.07E+06 | 7.64E+05 | 1.06E-03 | 2.39E-01 | 0.00E+00 | 0.00E+00 |
| 1063 | NA       | NA       | 1.92E+08 | 1.71E+08 | 5.73E+05 | 2.27E+05 | NA       | NA       | NA       | NA       |
| 1064 | 8.98E+05 | 2.56E+08 | 1.50E+08 | 2.09E+08 | 2.10E+06 | 3.86E+05 | 5.97E-03 | 4.28E-01 | 1.22E+00 | 6.62E+02 |
| 1065 | NA       | NA       | 2.19E+08 | 1.42E+08 | NA       | NA       | NA       | NA       | NA       | NA       |
| 1066 | NA       | NA       | 2.03E+08 | 1.55E+08 | 1.35E+06 | 8.26E+05 | NA       | NA       | NA       | NA       |
| 1067 | NA       | NA       | 1.21E+08 | 2.35E+08 | 1.36E+06 | 2.46E+06 | NA       | NA       | NA       | NA       |
| 1068 | NA       | NA       | 1.89E+08 | 1.65E+08 | 2.15E+06 | 1.10E+06 | NA       | NA       | NA       | NA       |
| 1069 | NA       | NA       | 2.04E+08 | 1.52E+08 | 8.83E+05 | 0.00E+00 | NA       | NA       | NA       | NA       |
| 1070 | NA       | NA       | 1.79E+08 | 1.75E+08 | 1.49E+06 | 1.35E+06 | NA       | NA       | NA       | NA       |
| 1071 | NA       | NA       | 2.01E+08 | 1.54E+08 | NA       | NA       | NA       | NA       | NA       | NA       |
| 1072 | NA       | NA       | 1.67E+08 | 1.86E+08 | 0.00E+00 | 0.00E+00 | NA       | NA       | NA       | NA       |
| 1073 | NA       | NA       | 2.17E+08 | 1.36E+08 | NA       | NA       | NA       | NA       | NA       | NA       |
| 1074 | NA       | NA       | 2.02E+08 | 1.50E+08 | 5.79E+05 | 1.59E+05 | NA       | NA       | NA       | NA       |
| 1075 | NA       | NA       | 2.03E+08 | 1.44E+08 | 2.69E+06 | 2.96E+06 | NA       | NA       | NA       | NA       |
| 1076 | NA       | NA       | 1.85E+08 | 1.65E+08 | 1.22E+06 | 2.46E+05 | NA       | NA       | NA       | NA       |
| 1077 | NA       | NA       | 1.38E+08 | 2.13E+08 | NA       | NA       | NA       | NA       | NA       | NA       |
| 1078 | NA       | NA       | 1.73E+08 | 1.75E+08 | 0.00E+00 | 1.11E+06 | NA       | NA       | NA       | NA       |
| 1079 | NA       | NA       | 1.99E+08 | 1.49E+08 | NA       | NA       | NA       | NA       | NA       | NA       |
| 1080 | NA       | NA       | 1.27E+08 | 2.20E+08 | 1.02E+06 | 0.00E+00 | NA       | NA       | NA       | NA       |
| 1081 | NA       | NA       | 2.05E+08 | 1.42E+08 | 3.93E+05 | 0.00E+00 | NA       | NA       | NA       | NA       |
| 1082 | NA       | NA       | 2.42E+08 | 1.03E+08 | 4.70E+05 | 7.99E+05 | NA       | NA       | NA       | NA       |
| 1083 | NA       | NA       | 2.13E+08 | 1.32E+08 | 7.76E+05 | 0.00E+00 | NA       | NA       | NA       | NA       |
| 1084 | NA       | NA       | 1.58E+08 | 1.88E+08 | NA       | NA       | NA       | NA       | NA       | NA       |
| 1085 | 1.81E+07 | 0.00E+00 | 1.75E+08 | 1.68E+08 | 5.40E+05 | 1.28E+06 | 1.03E-01 | 3.35E+01 | 0.00E+00 | 0.00E+00 |
| 1086 | 6.09E+06 | 1.34E+06 | 1.75E+08 | 1.64E+08 | 2.27E+06 | 2.74E+06 | 3.48E-02 | 2.68E+00 | 8.17E-03 | 4.90E-01 |
| 1087 | NA       | NA       | 1.57E+08 | 1.87E+08 | 1.44E+05 | 3.54E+05 | NA       | NA       | NA       | NA       |
| 1088 | NA       | NA       | 1.74E+08 | 1.64E+08 | 2.36E+06 | 6.90E+05 | NA       | NA       | NA       | NA       |
| 1089 | 2.40E+07 | 4.40E+06 | 1.39E+08 | 1.97E+08 | 1.90E+06 | 2.75E+06 | 1.73E-01 | 1.26E+01 | 2.23E-02 | 1.60E+00 |
| 1090 | 9.91E+05 | 0.00E+00 | 1.71E+08 | 1.67E+08 | 4.97E+05 | 1.93E+06 | 5.79E-03 | 1.99E+00 | 0.00E+00 | 0.00E+00 |
| 1091 | NA       | NA       | 1.93E+08 | 1.43E+08 | 2.22E+06 | 1.27E+06 | NA       | NA       | NA       | NA       |
| 1092 | NA       | NA       | 2.33E+08 | 1.06E+08 | 1.56E+05 | 0.00E+00 | NA       | NA       | NA       | NA       |
| 1093 | NA       | NA       | 1.73E+08 | 1.61E+08 | 2.18E+06 | 1.70E+06 | NA       | NA       | NA       | NA       |
| 1094 | NA       | NA       | 1.64E+08 | 1.72E+08 | 1.43E+06 | 0.00E+00 | NA       | NA       | NA       | NA       |
| 1095 | NA       | NA       | 1.58E+08 | 1.79E+08 | 0.00E+00 | 5.54E+05 | NA       | NA       | NA       | NA       |
| 1096 | NA       | NA       | 2.04E+08 | 1.33E+08 | 2.14E+05 | 0.00E+00 | NA       | NA       | NA       | NA       |
| 1097 | 0.00E+00 | 1.91E+07 | 1.96E+08 | 1.37E+08 | 2.37E+06 | 2.03E+05 | 0.00E+00 | 0.00E+00 | 1.39E-01 | 9.42E+01 |
| 1098 | NA       | NA       | 1.81E+08 | 1.52E+08 | 1.13E+06 | 1.65E+05 | NA       | NA       | NA       | NA       |

|      |          |          |          |          |          |          |          |          |          |          |
|------|----------|----------|----------|----------|----------|----------|----------|----------|----------|----------|
| 1099 | 0.00E+00 | 3.63E+07 | 9.49E+07 | 2.37E+08 | 1.61E+06 | 1.60E+06 | 0.00E+00 | 0.00E+00 | 1.53E-01 | 2.26E+01 |
| 1100 | NA       | NA       | 2.01E+08 | 1.29E+08 | 0.00E+00 | 1.51E+06 | NA       | NA       | NA       | NA       |
| 1101 | 9.42E+06 | 0.00E+00 | 1.64E+08 | 1.63E+08 | 2.22E+06 | 1.79E+06 | 5.76E-02 | 4.25E+00 | 0.00E+00 | 0.00E+00 |
| 1102 | NA       | NA       | 2.03E+08 | 1.26E+08 | 1.78E+06 | 6.37E+05 | NA       | NA       | NA       | NA       |
| 1103 | NA       | NA       | 1.51E+08 | 1.78E+08 | 1.68E+06 | 0.00E+00 | NA       | NA       | NA       | NA       |
| 1104 | NA       | NA       | 1.77E+08 | 1.50E+08 | 2.45E+06 | 4.13E+05 | NA       | NA       | NA       | NA       |
| 1105 | NA       | NA       | 1.61E+08 | 1.66E+08 | 9.90E+05 | 4.06E+05 | NA       | NA       | NA       | NA       |
| 1106 | NA       | NA       | 1.65E+08 | 1.60E+08 | 8.33E+05 | 6.84E+05 | NA       | NA       | NA       | NA       |
| 1107 | NA       | NA       | 1.69E+08 | 1.55E+08 | 9.11E+05 | 1.59E+06 | NA       | NA       | NA       | NA       |
| 1108 | NA       | NA       | 7.33E+07 | 2.43E+08 | 6.71E+06 | 3.51E+06 | NA       | NA       | NA       | NA       |
| 1109 | NA       | NA       | 1.65E+08 | 1.60E+08 | 1.08E+06 | 0.00E+00 | NA       | NA       | NA       | NA       |
| 1110 | NA       | NA       | 1.17E+08 | 2.00E+08 | 5.67E+06 | 3.69E+06 | NA       | NA       | NA       | NA       |
| 1111 | NA       | NA       | 1.65E+08 | 1.56E+08 | 2.61E+06 | 0.00E+00 | NA       | NA       | NA       | NA       |
| 1112 | NA       | NA       | 1.42E+08 | 1.81E+08 | 8.62E+04 | 2.24E+05 | NA       | NA       | NA       | NA       |
| 1113 | NA       | NA       | 1.61E+08 | 1.60E+08 | 0.00E+00 | 6.47E+04 | NA       | NA       | NA       | NA       |
| 1114 | NA       | NA       | 1.78E+08 | 1.40E+08 | 3.24E+05 | 1.34E+06 | NA       | NA       | NA       | NA       |
| 1115 | NA       | NA       | 2.13E+08 | 1.06E+08 | 0.00E+00 | 4.97E+05 | NA       | NA       | NA       | NA       |
| 1116 | NA       | NA       | 1.91E+08 | 1.27E+08 | 2.89E+05 | 1.11E+05 | NA       | NA       | NA       | NA       |
| 1117 | NA       | NA       | 1.72E+08 | 1.40E+08 | 5.55E+06 | 0.00E+00 | NA       | NA       | NA       | NA       |
| 1118 | NA       | NA       | 1.80E+08 | 1.37E+08 | 0.00E+00 | 9.12E+04 | NA       | NA       | NA       | NA       |
| 1119 | NA       | NA       | 1.74E+08 | 1.40E+08 | 1.64E+06 | 9.65E+04 | NA       | NA       | NA       | NA       |
| 1120 | 5.28E+07 | 0.00E+00 | 1.39E+08 | 1.70E+08 | 0.00E+00 | 6.39E+06 | 3.79E-01 | Inf      | 0.00E+00 | 0.00E+00 |
| 1121 | 1.45E+07 | 1.37E+07 | 1.62E+08 | 1.48E+08 | 2.52E+06 | 1.41E+06 | 8.96E-02 | 5.78E+00 | 9.23E-02 | 9.70E+00 |
| 1122 | NA       | NA       | 1.84E+08 | 1.30E+08 | 3.11E+05 | 4.91E+05 | NA       | NA       | NA       | NA       |
| 1123 | NA       | NA       | 2.60E+08 | 5.17E+07 | 2.49E+06 | 1.83E+05 | NA       | NA       | NA       | NA       |
| 1124 | NA       | NA       | 1.67E+08 | 1.46E+08 | NA       | NA       | NA       | NA       | NA       | NA       |
| 1125 | NA       | NA       | 1.40E+08 | 1.67E+08 | 2.79E+06 | 1.17E+06 | NA       | NA       | NA       | NA       |
| 1126 | NA       | NA       | 1.10E+08 | 1.97E+08 | 1.57E+06 | 2.08E+06 | NA       | NA       | NA       | NA       |
| 1127 | 2.31E+07 | 8.25E+06 | NA       | NA       | 1.63E+08 | 1.47E+08 | NA       | 1.42E-01 | NA       | 5.61E-02 |
| 1128 | NA       | NA       | 2.23E+08 | 8.62E+07 | 5.36E+05 | 0.00E+00 | NA       | NA       | NA       | NA       |
| 1129 | 4.04E+06 | 5.00E+06 | 1.26E+08 | 1.80E+08 | 1.80E+06 | 3.38E+05 | 3.20E-02 | 2.25E+00 | 2.78E-02 | 1.48E+01 |
| 1130 | NA       | NA       | 1.60E+08 | 1.48E+08 | NA       | NA       | NA       | NA       | NA       | NA       |
| 1131 | 7.54E+06 | 0.00E+00 | 1.27E+08 | 1.79E+08 | 7.92E+05 | 1.38E+06 | 5.91E-02 | 9.52E+00 | 0.00E+00 | 0.00E+00 |
| 1132 | NA       | NA       | 1.43E+08 | 1.63E+08 | 1.41E+06 | 6.83E+05 | NA       | NA       | NA       | NA       |
| 1133 | NA       | NA       | 1.55E+08 | 1.52E+08 | 5.21E+05 | 0.00E+00 | NA       | NA       | NA       | NA       |
| 1134 | NA       | NA       | 1.62E+08 | 1.46E+08 | NA       | NA       | NA       | NA       | NA       | NA       |
| 1135 | NA       | NA       | 1.64E+08 | 1.36E+08 | 2.68E+06 | 1.69E+06 | NA       | NA       | NA       | NA       |
| 1136 | NA       | NA       | 1.41E+08 | 1.59E+08 | 1.06E+05 | 8.21E+05 | NA       | NA       | NA       | NA       |

|      |          |          |          |          |          |          |          |          |          |          |
|------|----------|----------|----------|----------|----------|----------|----------|----------|----------|----------|
| 1137 | NA       | NA       | 1.54E+08 | 1.47E+08 | 0.00E+00 | 2.62E+05 | NA       | NA       | NA       | NA       |
| 1138 | NA       | NA       | 1.87E+08 | 1.11E+08 | 1.43E+06 | 1.69E+05 | NA       | NA       | NA       | NA       |
| 1139 | NA       | NA       | 1.23E+08 | 1.75E+08 | 4.73E+05 | 7.96E+05 | NA       | NA       | NA       | NA       |
| 1140 | NA       | NA       | 2.05E+08 | 9.34E+07 | 0.00E+00 | 5.23E+05 | NA       | NA       | NA       | NA       |
| 1141 | NA       | NA       | 1.82E+08 | 1.14E+08 | 1.75E+06 | 8.18E+05 | NA       | NA       | NA       | NA       |
| 1142 | NA       | NA       | 1.74E+08 | 1.23E+08 | 6.10E+05 | 0.00E+00 | NA       | NA       | NA       | NA       |
| 1143 | NA       | NA       | 9.96E+07 | 1.94E+08 | 1.03E+06 | 2.04E+06 | NA       | NA       | NA       | NA       |
| 1144 | NA       | NA       | 1.21E+08 | 1.75E+08 | NA       | NA       | NA       | NA       | NA       | NA       |
| 1145 | 5.38E+07 | 5.98E+06 | 1.54E+08 | 1.38E+08 | 2.37E+06 | 1.95E+06 | 3.49E-01 | 2.26E+01 | 4.31E-02 | 3.07E+00 |
| 1146 | NA       | NA       | 1.50E+08 | 1.44E+08 | 1.28E+06 | 4.04E+05 | NA       | NA       | NA       | NA       |
| 1147 | NA       | NA       | 1.60E+08 | 1.34E+08 | 1.21E+06 | 1.01E+06 | NA       | NA       | NA       | NA       |
| 1148 | 1.57E+07 | 1.30E+07 | 1.38E+08 | 1.53E+08 | 3.10E+06 | 1.69E+06 | 1.14E-01 | 5.08E+00 | 8.48E-02 | 7.65E+00 |
| 1149 | NA       | NA       | 1.68E+08 | 1.26E+08 | 0.00E+00 | 2.93E+05 | NA       | NA       | NA       | NA       |
| 1150 | NA       | NA       | 1.81E+08 | 1.12E+08 | 1.15E+06 | 1.95E+05 | NA       | NA       | NA       | NA       |
| 1151 | NA       | NA       | 2.03E+08 | 9.03E+07 | 5.08E+04 | 8.84E+04 | NA       | NA       | NA       | NA       |
| 1152 | NA       | NA       | 1.74E+08 | 1.18E+08 | 1.06E+06 | 5.15E+05 | NA       | NA       | NA       | NA       |
| 1153 | NA       | NA       | 1.59E+08 | 1.32E+08 | 1.37E+06 | 0.00E+00 | NA       | NA       | NA       | NA       |
| 1154 | NA       | NA       | 1.48E+08 | 1.42E+08 | NA       | NA       | NA       | NA       | NA       | NA       |
| 1155 | NA       | NA       | 1.66E+08 | 1.23E+08 | 6.27E+05 | 1.00E+06 | NA       | NA       | NA       | NA       |
| 1156 | 3.29E+05 | 0.00E+00 | 2.09E+08 | 8.01E+07 | 0.00E+00 | 6.61E+05 | 1.57E-03 | Inf      | 0.00E+00 | 0.00E+00 |
| 1157 | NA       | NA       | 1.55E+08 | 1.33E+08 | 9.55E+05 | 0.00E+00 | NA       | NA       | NA       | NA       |
| 1158 | NA       | NA       | 1.47E+08 | 1.41E+08 | NA       | NA       | NA       | NA       | NA       | NA       |
| 1159 | NA       | NA       | 1.44E+08 | 1.41E+08 | 0.00E+00 | 9.28E+05 | NA       | NA       | NA       | NA       |
| 1160 | NA       | NA       | 1.34E+08 | 1.49E+08 | 1.51E+06 | 0.00E+00 | NA       | NA       | NA       | NA       |
| 1161 | NA       | NA       | 2.13E+08 | 6.97E+07 | 0.00E+00 | 1.06E+06 | NA       | NA       | NA       | NA       |
| 1162 | NA       | NA       | 1.38E+08 | 1.45E+08 | NA       | NA       | NA       | NA       | NA       | NA       |
| 1163 | NA       | NA       | 1.65E+08 | 1.15E+08 | 8.59E+05 | 5.56E+05 | NA       | NA       | NA       | NA       |
| 1164 | NA       | NA       | 1.69E+08 | 1.11E+08 | 4.97E+05 | 0.00E+00 | NA       | NA       | NA       | NA       |
| 1165 | 0.00E+00 | 2.56E+06 | 1.50E+08 | 1.29E+08 | 1.27E+06 | 1.08E+06 | 0.00E+00 | 0.00E+00 | 1.98E-02 | 2.37E+00 |
| 1166 | NA       | NA       | 1.57E+08 | 1.23E+08 | 5.60E+05 | 0.00E+00 | NA       | NA       | NA       | NA       |
| 1167 | NA       | NA       | 1.63E+08 | 1.17E+08 | 0.00E+00 | 0.00E+00 | NA       | NA       | NA       | NA       |
| 1168 | NA       | NA       | 1.24E+08 | 1.53E+08 | 3.09E+06 | 0.00E+00 | NA       | NA       | NA       | NA       |
| 1169 | NA       | NA       | 1.58E+08 | 1.22E+08 | 1.52E+05 | 1.47E+05 | NA       | NA       | NA       | NA       |
| 1170 | 1.12E+05 | 2.59E+07 | 1.61E+08 | 1.16E+08 | 1.06E+06 | 1.08E+06 | 6.96E-04 | 1.05E-01 | 2.24E-01 | 2.41E+01 |
| 1171 | 0.00E+00 | 1.09E+07 | 1.42E+08 | 1.37E+08 | 0.00E+00 | 0.00E+00 | 0.00E+00 | NA       | 7.96E-02 | Inf      |
| 1172 | 8.69E+06 | 0.00E+00 | 1.57E+08 | 1.17E+08 | 1.69E+06 | 1.48E+06 | 5.53E-02 | 5.14E+00 | 0.00E+00 | 0.00E+00 |
| 1173 | NA       | NA       | 1.75E+08 | 1.01E+08 | 6.49E+05 | 2.16E+05 | NA       | NA       | NA       | NA       |
| 1174 | NA       | NA       | 1.24E+08 | 1.49E+08 | 1.05E+06 | 7.83E+05 | NA       | NA       | NA       | NA       |

|      |          |          |          |          |          |          |          |          |          |          |
|------|----------|----------|----------|----------|----------|----------|----------|----------|----------|----------|
| 1175 | NA       | NA       | 1.91E+08 | 8.44E+07 | NA       | NA       | NA       | NA       | NA       | NA       |
| 1176 | NA       | NA       | 1.82E+08 | 9.25E+07 | 5.30E+05 | 0.00E+00 | NA       | NA       | NA       | NA       |
| 1177 | NA       | NA       | 1.17E+08 | 1.54E+08 | 1.36E+06 | 0.00E+00 | NA       | NA       | NA       | NA       |
| 1178 | 4.67E+06 | 0.00E+00 | 1.38E+08 | 1.33E+08 | 5.29E+05 | 3.70E+05 | 3.39E-02 | 8.82E+00 | 0.00E+00 | 0.00E+00 |
| 1179 | NA       | NA       | 1.39E+08 | 1.33E+08 | NA       | NA       | NA       | NA       | NA       | NA       |
| 1180 | NA       | NA       | 1.67E+08 | 9.98E+07 | 4.63E+05 | 2.88E+06 | NA       | NA       | NA       | NA       |
| 1181 | NA       | NA       | 1.55E+08 | 1.15E+08 | 1.90E+05 | 0.00E+00 | NA       | NA       | NA       | NA       |
| 1182 | NA       | NA       | 1.23E+08 | 1.42E+08 | 1.05E+06 | 1.37E+06 | NA       | NA       | NA       | NA       |
| 1183 | 0.00E+00 | 0.00E+00 | 1.31E+08 | 1.36E+08 | 0.00E+00 | 0.00E+00 | 0.00E+00 | NA       | 0.00E+00 | NA       |
| 1184 | 7.02E+06 | 1.30E+07 | 1.66E+08 | 9.94E+07 | 1.24E+06 | 1.61E+05 | 4.22E-02 | 5.67E+00 | 1.31E-01 | 8.08E+01 |
| 1185 | NA       | NA       | 1.57E+08 | 1.10E+08 | NA       | NA       | NA       | NA       | NA       | NA       |
| 1186 | NA       | NA       | 1.29E+08 | 1.36E+08 | 6.87E+05 | 8.13E+05 | NA       | NA       | NA       | NA       |
| 1187 | NA       | NA       | 1.54E+08 | 1.07E+08 | 3.25E+06 | 1.40E+06 | NA       | NA       | NA       | NA       |
| 1188 | NA       | NA       | 1.68E+08 | 9.66E+07 | 4.27E+05 | 4.90E+05 | NA       | NA       | NA       | NA       |
| 1189 | NA       | NA       | 1.55E+08 | 1.10E+08 | 0.00E+00 | 0.00E+00 | NA       | NA       | NA       | NA       |
| 1190 | NA       | NA       | 1.55E+08 | 1.07E+08 | 2.41E+06 | 0.00E+00 | NA       | NA       | NA       | NA       |
| 1191 | NA       | NA       | 1.47E+08 | 1.18E+08 | 0.00E+00 | 1.57E+05 | NA       | NA       | NA       | NA       |
| 1192 | NA       | NA       | 1.66E+08 | 9.83E+07 | NA       | NA       | NA       | NA       | NA       | NA       |
| 1193 | NA       | NA       | 1.54E+08 | 1.07E+08 | 2.53E+06 | 1.52E+05 | NA       | NA       | NA       | NA       |
| 1194 | NA       | NA       | 1.54E+08 | 1.02E+08 | 7.41E+05 | 1.38E+06 | NA       | NA       | NA       | NA       |
| 1195 | NA       | NA       | 1.32E+08 | 1.25E+08 | 0.00E+00 | 2.28E+05 | NA       | NA       | NA       | NA       |
| 1196 | NA       | NA       | 1.23E+08 | 1.35E+08 | 0.00E+00 | 0.00E+00 | NA       | NA       | NA       | NA       |
| 1197 | NA       | NA       | 1.30E+08 | 1.24E+08 | 1.46E+06 | 1.20E+05 | NA       | NA       | NA       | NA       |
| 1198 | NA       | NA       | NA       | NA       | 1.62E+08 | 9.38E+07 | NA       | NA       | NA       | NA       |
| 1199 | NA       | NA       | 1.34E+08 | 1.19E+08 | 2.44E+05 | 9.15E+05 | NA       | NA       | NA       | NA       |
| 1200 | NA       | NA       | 1.15E+08 | 1.34E+08 | 4.47E+06 | 1.14E+06 | NA       | NA       | NA       | NA       |
| 1201 | NA       | NA       | 1.41E+08 | 1.10E+08 | 0.00E+00 | 2.55E+06 | NA       | NA       | NA       | NA       |
| 1202 | NA       | NA       | 6.20E+07 | 1.89E+08 | 2.10E+06 | 7.26E+05 | NA       | NA       | NA       | NA       |
| 1203 | NA       | NA       | 9.50E+07 | 1.56E+08 | NA       | NA       | NA       | NA       | NA       | NA       |
| 1204 | 0.00E+00 | 7.37E+05 | 1.49E+08 | 9.97E+07 | 1.53E+06 | 6.21E+05 | 0.00E+00 | 0.00E+00 | 7.40E-03 | 1.19E+00 |
| 1205 | NA       | NA       | 1.36E+08 | 1.14E+08 | NA       | NA       | NA       | NA       | NA       | NA       |
| 1206 | 2.57E+08 | 1.33E+07 | 9.35E+07 | 1.52E+08 | 1.04E+06 | 2.21E+06 | 2.75E+00 | 2.47E+02 | 8.77E-02 | 6.05E+00 |
| 1207 | NA       | NA       | 1.62E+08 | 8.22E+07 | 2.25E+06 | 1.09E+06 | NA       | NA       | NA       | NA       |
| 1208 | NA       | NA       | 1.08E+08 | 1.36E+08 | 1.46E+06 | 1.93E+06 | NA       | NA       | NA       | NA       |
| 1209 | NA       | NA       | 1.03E+08 | 1.36E+08 | 6.33E+06 | 1.50E+06 | NA       | NA       | NA       | NA       |
| 1210 | NA       | NA       | 1.37E+08 | 1.08E+08 | NA       | NA       | NA       | NA       | NA       | NA       |
| 1211 | NA       | NA       | 1.33E+08 | 1.12E+08 | NA       | NA       | NA       | NA       | NA       | NA       |
| 1212 | NA       | NA       | 1.44E+08 | 9.96E+07 | 2.75E+05 | 1.35E+05 | NA       | NA       | NA       | NA       |



|      |          |          |          |          |          |          |          |          |          |          |
|------|----------|----------|----------|----------|----------|----------|----------|----------|----------|----------|
| 1213 | 5.74E+07 | 0.00E+00 | 1.22E+08 | 1.19E+08 | 1.11E+06 | 2.05E+06 | 4.72E-01 | 5.18E+01 | 0.00E+00 | 0.00E+00 |
| 1214 | NA       | NA       | 1.94E+08 | 4.93E+07 | 1.65E+05 | 0.00E+00 | NA       | NA       | NA       | NA       |
| 1215 | NA       | NA       | 1.62E+08 | 7.68E+07 | 3.14E+06 | 7.78E+05 | NA       | NA       | NA       | NA       |
| 1216 | NA       | NA       | 1.46E+08 | 9.35E+07 | 1.37E+06 | 0.00E+00 | NA       | NA       | NA       | NA       |
| 1217 | NA       | NA       | 1.44E+08 | 9.62E+07 | NA       | NA       | NA       | NA       | NA       | NA       |
| 1218 | NA       | NA       | 9.36E+07 | 1.41E+08 | 4.13E+06 | 8.64E+05 | NA       | NA       | NA       | NA       |
| 1219 | NA       | NA       | 1.22E+08 | 1.16E+08 | 3.28E+05 | 3.98E+05 | NA       | NA       | NA       | NA       |
| 1220 | NA       | NA       | 1.30E+08 | 1.06E+08 | 1.21E+06 | 0.00E+00 | NA       | NA       | NA       | NA       |
| 1221 | NA       | NA       | 1.68E+08 | 6.67E+07 | 1.42E+06 | 1.12E+06 | NA       | NA       | NA       | NA       |
| 1222 | 9.86E+05 | 0.00E+00 | 1.11E+08 | 1.24E+08 | 5.30E+05 | 4.18E+05 | 8.88E-03 | 1.86E+00 | 0.00E+00 | 0.00E+00 |
| 1223 | NA       | NA       | 1.35E+08 | 9.67E+07 | 1.00E+06 | 3.17E+06 | NA       | NA       | NA       | NA       |
| 1224 | NA       | NA       | 1.10E+08 | 1.22E+08 | 1.87E+06 | 1.18E+06 | NA       | NA       | NA       | NA       |
| 1225 | NA       | NA       | 1.21E+08 | 1.13E+08 | 6.81E+05 | 0.00E+00 | NA       | NA       | NA       | NA       |
| 1226 | NA       | NA       | 7.10E+07 | 1.62E+08 | 6.06E+05 | 0.00E+00 | NA       | NA       | NA       | NA       |
| 1227 | NA       | NA       | NA       | NA       | 1.20E+08 | 1.12E+08 | NA       | NA       | NA       | NA       |
| 1228 | NA       | NA       | 1.48E+08 | 8.35E+07 | NA       | NA       | NA       | NA       | NA       | NA       |
| 1229 | NA       | NA       | 1.12E+08 | 1.18E+08 | 2.74E+05 | 0.00E+00 | NA       | NA       | NA       | NA       |
| 1230 | NA       | NA       | 9.47E+07 | 1.36E+08 | 0.00E+00 | 1.93E+05 | NA       | NA       | NA       | NA       |
| 1231 | NA       | NA       | 1.14E+08 | 1.15E+08 | 9.63E+05 | 2.51E+05 | NA       | NA       | NA       | NA       |
| 1232 | NA       | NA       | 1.29E+08 | 1.02E+08 | NA       | NA       | NA       | NA       | NA       | NA       |
| 1233 | NA       | NA       | 1.22E+08 | 1.08E+08 | NA       | NA       | NA       | NA       | NA       | NA       |
| 1234 | NA       | NA       | 1.02E+08 | 1.27E+08 | NA       | NA       | NA       | NA       | NA       | NA       |
| 1235 | NA       | NA       | 1.26E+08 | 1.01E+08 | 9.75E+05 | 0.00E+00 | NA       | NA       | NA       | NA       |
| 1236 | NA       | NA       | 1.39E+08 | 8.80E+07 | 0.00E+00 | 1.97E+05 | NA       | NA       | NA       | NA       |
| 1237 | NA       | NA       | 1.01E+08 | 1.25E+08 | 1.84E+06 | 0.00E+00 | NA       | NA       | NA       | NA       |
| 1238 | NA       | NA       | 9.66E+07 | 1.27E+08 | 5.72E+05 | 4.38E+05 | NA       | NA       | NA       | NA       |
| 1239 | NA       | NA       | 1.27E+08 | 9.62E+07 | 8.20E+05 | 0.00E+00 | NA       | NA       | NA       | NA       |
| 1240 | 9.70E+05 | 0.00E+00 | 1.43E+08 | 7.81E+07 | 3.55E+05 | 2.04E+05 | 6.79E-03 | 2.73E+00 | 0.00E+00 | 0.00E+00 |
| 1241 | 9.91E+05 | 0.00E+00 | 1.13E+08 | 1.06E+08 | 1.28E+06 | 1.46E+06 | 8.80E-03 | 7.73E-01 | 0.00E+00 | 0.00E+00 |
| 1242 | NA       | NA       | 1.08E+08 | 1.03E+08 | 1.18E+06 | 8.79E+06 | NA       | NA       | NA       | NA       |
| 1243 | NA       | NA       | 1.05E+08 | 1.14E+08 | 9.15E+05 | 6.60E+05 | NA       | NA       | NA       | NA       |
| 1244 | NA       | NA       | 1.19E+08 | 1.01E+08 | 5.34E+05 | 0.00E+00 | NA       | NA       | NA       | NA       |
| 1245 | NA       | NA       | 1.31E+08 | 8.73E+07 | 8.13E+05 | 3.68E+05 | NA       | NA       | NA       | NA       |
| 1246 | NA       | NA       | 9.91E+07 | 1.19E+08 | 4.86E+05 | 4.93E+05 | NA       | NA       | NA       | NA       |
| 1247 | NA       | NA       | 1.05E+08 | 1.14E+08 | 1.47E+05 | 0.00E+00 | NA       | NA       | NA       | NA       |
| 1248 | NA       | NA       | 1.80E+08 | 3.74E+07 | 7.35E+04 | 2.13E+05 | NA       | NA       | NA       | NA       |
| 1249 | NA       | NA       | 1.30E+08 | 8.78E+07 | NA       | NA       | NA       | NA       | NA       | NA       |
| 1250 | NA       | NA       | 1.64E+08 | 5.37E+07 | NA       | NA       | NA       | NA       | NA       | NA       |

|      |          |          |          |          |          |          |          |          |          |          |
|------|----------|----------|----------|----------|----------|----------|----------|----------|----------|----------|
| 1251 | NA       | NA       | 1.34E+08 | 8.12E+07 | 4.43E+05 | 1.16E+05 | NA       | NA       | NA       | NA       |
| 1252 | NA       | NA       | 1.16E+08 | 9.95E+07 | NA       | NA       | NA       | NA       | NA       | NA       |
| 1253 | 1.63E+06 | 0.00E+00 | 1.13E+08 | 1.01E+08 | 9.36E+05 | 2.70E+05 | 1.45E-02 | 1.74E+00 | 0.00E+00 | 0.00E+00 |
| 1254 | 1.82E+05 | 6.31E+06 | 1.08E+08 | 1.05E+08 | 3.70E+05 | 9.73E+04 | 1.68E-03 | 4.93E-01 | 6.00E-02 | 6.49E+01 |
| 1255 | 0.00E+00 | 5.08E+05 | 9.25E+07 | 1.21E+08 | 2.56E+05 | 2.43E+05 | 0.00E+00 | 0.00E+00 | 4.21E-03 | 2.09E+00 |
| 1256 | 0.00E+00 | 8.88E+06 | 1.35E+08 | 7.42E+07 | 4.00E+05 | 1.10E+06 | 0.00E+00 | 0.00E+00 | 1.20E-01 | 8.09E+00 |
| 1257 | NA       | NA       | 9.48E+07 | 1.14E+08 | 5.29E+05 | 1.17E+06 | NA       | NA       | NA       | NA       |
| 1258 | NA       | NA       | 1.09E+08 | 1.02E+08 | NA       | NA       | NA       | NA       | NA       | NA       |
| 1259 | NA       | NA       | 1.79E+08 | 3.06E+07 | 8.26E+05 | 0.00E+00 | NA       | NA       | NA       | NA       |
| 1260 | NA       | NA       | 1.24E+08 | 8.42E+07 | 5.11E+05 | 2.90E+05 | NA       | NA       | NA       | NA       |
| 1261 | 1.62E+07 | 0.00E+00 | 1.29E+08 | 7.75E+07 | 8.34E+05 | 2.29E+06 | 1.26E-01 | 1.94E+01 | 0.00E+00 | 0.00E+00 |
| 1262 | NA       | NA       | 8.41E+07 | 1.23E+08 | 9.86E+05 | 2.05E+05 | NA       | NA       | NA       | NA       |
| 1263 | NA       | NA       | 1.13E+08 | 9.45E+07 | 7.92E+05 | 0.00E+00 | NA       | NA       | NA       | NA       |
| 1264 | NA       | NA       | 1.14E+08 | 9.42E+07 | NA       | NA       | NA       | NA       | NA       | NA       |
| 1265 | NA       | NA       | 1.36E+08 | 7.06E+07 | 3.38E+05 | 5.36E+05 | NA       | NA       | NA       | NA       |
| 1266 | NA       | NA       | 1.09E+08 | 9.60E+07 | 3.95E+05 | 2.38E+05 | NA       | NA       | NA       | NA       |
| 1267 | NA       | NA       | 1.41E+08 | 6.11E+07 | 7.02E+04 | 6.87E+04 | NA       | NA       | NA       | NA       |
| 1268 | NA       | NA       | 1.81E+08 | 2.02E+07 | 1.12E+06 | 1.80E+05 | NA       | NA       | NA       | NA       |
| 1269 | NA       | NA       | 1.44E+08 | 5.76E+07 | 6.24E+05 | 1.74E+05 | NA       | NA       | NA       | NA       |
| 1270 | NA       | NA       | 8.65E+07 | 1.14E+08 | 1.17E+06 | 0.00E+00 | NA       | NA       | NA       | NA       |
| 1271 | NA       | NA       | 1.25E+08 | 7.53E+07 | 4.75E+05 | 3.31E+05 | NA       | NA       | NA       | NA       |
| 1272 | NA       | NA       | 9.80E+07 | 9.97E+07 | 3.10E+06 | 7.96E+05 | NA       | NA       | NA       | NA       |
| 1273 | NA       | NA       | 1.39E+08 | 6.01E+07 | 8.79E+05 | 1.14E+06 | NA       | NA       | NA       | NA       |
| 1274 | 4.04E+06 | 2.90E+07 | 1.38E+08 | 6.14E+07 | 8.61E+05 | 6.22E+05 | 2.93E-02 | 4.68E+00 | 4.72E-01 | 4.66E+01 |
| 1275 | NA       | NA       | 1.09E+08 | 9.15E+07 | NA       | NA       | NA       | NA       | NA       | NA       |
| 1276 | NA       | NA       | 1.04E+08 | 9.10E+07 | 2.86E+06 | 2.08E+06 | NA       | NA       | NA       | NA       |
| 1277 | NA       | NA       | 1.27E+08 | 7.09E+07 | 2.40E+06 | 0.00E+00 | NA       | NA       | NA       | NA       |
| 1278 | 6.31E+06 | 0.00E+00 | 5.20E+07 | 1.47E+08 | NA       | NA       | 1.21E-01 | NA       | 0.00E+00 | NA       |
| 1279 | NA       | NA       | 1.43E+08 | 5.51E+07 | 5.96E+05 | 2.71E+05 | NA       | NA       | NA       | NA       |
| 1280 | NA       | NA       | 8.82E+07 | 1.09E+08 | 8.11E+04 | 1.27E+06 | NA       | NA       | NA       | NA       |
| 1281 | NA       | NA       | 1.06E+08 | 9.17E+07 | 6.97E+05 | 0.00E+00 | NA       | NA       | NA       | NA       |
| 1282 | NA       | NA       | 1.02E+08 | 9.64E+07 | 0.00E+00 | 6.31E+04 | NA       | NA       | NA       | NA       |
| 1283 | NA       | NA       | 8.26E+07 | 1.13E+08 | 8.14E+05 | 8.36E+04 | NA       | NA       | NA       | NA       |
| 1284 | NA       | NA       | 8.08E+07 | 1.15E+08 | NA       | NA       | NA       | NA       | NA       | NA       |
| 1285 | NA       | NA       | 9.15E+07 | 1.03E+08 | 7.65E+05 | 0.00E+00 | NA       | NA       | NA       | NA       |
| 1286 | NA       | NA       | 8.14E+07 | 1.13E+08 | 0.00E+00 | 2.22E+05 | NA       | NA       | NA       | NA       |
| 1287 | NA       | NA       | 1.01E+08 | 9.09E+07 | 9.60E+05 | 6.06E+05 | NA       | NA       | NA       | NA       |
| 1288 | NA       | NA       | 1.14E+08 | 7.77E+07 | 5.55E+05 | 5.19E+04 | NA       | NA       | NA       | NA       |

|      |          |          |          |          |          |          |          |          |          |          |
|------|----------|----------|----------|----------|----------|----------|----------|----------|----------|----------|
| 1289 | NA       | NA       | 1.17E+08 | 7.32E+07 | 7.98E+05 | 9.57E+05 | NA       | NA       | NA       | NA       |
| 1290 | NA       | NA       | 1.03E+08 | 8.61E+07 | 2.15E+06 | 2.79E+05 | NA       | NA       | NA       | NA       |
| 1291 | 1.32E+07 | 1.89E+07 | 1.33E+08 | 5.77E+07 | 7.46E+05 | 0.00E+00 | 9.92E-02 | 1.77E+01 | 3.28E-01 | Inf      |
| 1292 | NA       | NA       | 1.06E+08 | 8.37E+07 | 1.96E+05 | 1.30E+06 | NA       | NA       | NA       | NA       |
| 1293 | NA       | NA       | 1.14E+08 | 7.48E+07 | 9.07E+05 | 0.00E+00 | NA       | NA       | NA       | NA       |
| 1294 | NA       | NA       | 7.22E+07 | 1.16E+08 | 1.18E+06 | 2.31E+05 | NA       | NA       | NA       | NA       |
| 1295 | NA       | NA       | 9.61E+07 | 9.16E+07 | 1.18E+06 | 2.70E+05 | NA       | NA       | NA       | NA       |
| 1296 | NA       | NA       | 1.15E+08 | 7.40E+07 | NA       | NA       | NA       | NA       | NA       | NA       |
| 1297 | NA       | NA       | 9.56E+07 | 9.10E+07 | 0.00E+00 | 1.58E+05 | NA       | NA       | NA       | NA       |
| 1298 | NA       | NA       | 7.93E+07 | 1.06E+08 | 7.05E+05 | 0.00E+00 | NA       | NA       | NA       | NA       |
| 1299 | NA       | NA       | 1.20E+08 | 6.36E+07 | 1.03E+06 | 4.75E+05 | NA       | NA       | NA       | NA       |
| 1300 | NA       | NA       | 1.13E+08 | 7.01E+07 | 2.02E+06 | 0.00E+00 | NA       | NA       | NA       | NA       |
| 1301 | NA       | NA       | 1.00E+08 | 8.37E+07 | NA       | NA       | NA       | NA       | NA       | NA       |
| 1302 | NA       | NA       | 1.04E+08 | 7.86E+07 | 8.65E+05 | 4.30E+05 | NA       | NA       | NA       | NA       |
| 1303 | 1.65E+06 | 4.11E+06 | 6.72E+07 | 1.10E+08 | 2.64E+06 | 3.80E+06 | 2.46E-02 | 6.25E-01 | 3.74E-02 | 1.08E+00 |
| 1304 | NA       | NA       | 1.13E+08 | 7.02E+07 | 0.00E+00 | 0.00E+00 | NA       | NA       | NA       | NA       |
| 1305 | NA       | NA       | 1.25E+08 | 5.85E+07 | 0.00E+00 | 8.81E+04 | NA       | NA       | NA       | NA       |
| 1306 | NA       | NA       | 9.41E+07 | 8.82E+07 | 9.54E+04 | 0.00E+00 | NA       | NA       | NA       | NA       |
| 1307 | NA       | NA       | 8.65E+07 | 9.56E+07 | NA       | NA       | NA       | NA       | NA       | NA       |
| 1308 | 2.05E+05 | 0.00E+00 | 6.75E+07 | 1.13E+08 | 5.78E+05 | 6.85E+05 | 3.04E-03 | 3.55E-01 | 0.00E+00 | 0.00E+00 |
| 1309 | NA       | NA       | 1.05E+08 | 7.62E+07 | NA       | NA       | NA       | NA       | NA       | NA       |
| 1310 | NA       | NA       | 5.33E+07 | 1.26E+08 | 4.59E+05 | 5.76E+05 | NA       | NA       | NA       | NA       |
| 1311 | NA       | NA       | 9.61E+07 | 8.08E+07 | 1.24E+06 | 2.43E+06 | NA       | NA       | NA       | NA       |
| 1312 | 3.48E+06 | 0.00E+00 | 9.60E+07 | 8.17E+07 | 1.19E+06 | 1.57E+06 | 3.62E-02 | 2.93E+00 | 0.00E+00 | 0.00E+00 |
| 1313 | NA       | NA       | 9.83E+07 | 8.04E+07 | 9.80E+05 | 6.06E+05 | NA       | NA       | NA       | NA       |
| 1314 | 0.00E+00 | 0.00E+00 | 7.06E+07 | 1.08E+08 | 2.97E+05 | 3.88E+05 | 0.00E+00 | 0.00E+00 | 0.00E+00 | 0.00E+00 |
| 1315 | NA       | NA       | 8.21E+07 | 9.70E+07 | 0.00E+00 | 0.00E+00 | NA       | NA       | NA       | NA       |
| 1316 | NA       | NA       | 1.17E+08 | 5.97E+07 | 1.71E+06 | 9.81E+05 | NA       | NA       | NA       | NA       |
| 1317 | NA       | NA       | 9.62E+07 | 8.14E+07 | 7.67E+05 | 1.16E+05 | NA       | NA       | NA       | NA       |
| 1318 | NA       | NA       | 1.05E+08 | 7.32E+07 | NA       | NA       | NA       | NA       | NA       | NA       |
| 1319 | NA       | NA       | 1.09E+08 | 6.72E+07 | 6.95E+05 | 0.00E+00 | NA       | NA       | NA       | NA       |
| 1320 | NA       | NA       | 8.99E+07 | 8.68E+07 | NA       | NA       | NA       | NA       | NA       | NA       |
| 1321 | NA       | NA       | 1.13E+08 | 6.19E+07 | 0.00E+00 | 0.00E+00 | NA       | NA       | NA       | NA       |
| 1322 | NA       | NA       | 1.08E+08 | 6.72E+07 | NA       | NA       | NA       | NA       | NA       | NA       |
| 1323 | NA       | NA       | 1.01E+08 | 7.37E+07 | NA       | NA       | NA       | NA       | NA       | NA       |
| 1324 | NA       | NA       | 8.66E+07 | 8.84E+07 | NA       | NA       | NA       | NA       | NA       | NA       |
| 1325 | NA       | NA       | 6.89E+07 | 1.05E+08 | 1.00E+06 | 0.00E+00 | NA       | NA       | NA       | NA       |
| 1326 | NA       | NA       | 1.01E+08 | 7.27E+07 | 0.00E+00 | 1.27E+05 | NA       | NA       | NA       | NA       |

|      |          |          |          |          |          |          |          |          |          |          |
|------|----------|----------|----------|----------|----------|----------|----------|----------|----------|----------|
| 1327 | NA       | NA       | 7.38E+07 | 9.84E+07 | 8.30E+05 | 0.00E+00 | NA       | NA       | NA       | NA       |
| 1328 | NA       | NA       | 9.21E+07 | 8.04E+07 | 4.74E+05 | 0.00E+00 | NA       | NA       | NA       | NA       |
| 1329 | 2.78E+06 | 2.71E+06 | 7.67E+07 | 9.57E+07 | NA       | NA       | 3.62E-02 | NA       | 2.83E-02 | NA       |
| 1330 | 0.00E+00 | 1.72E+08 | NA       | NA       | 0.00E+00 | 0.00E+00 | NA       | NA       | NA       | Inf      |
| 1331 | NA       | NA       | 9.70E+07 | 7.52E+07 | NA       | NA       | NA       | NA       | NA       | NA       |
| 1332 | NA       | NA       | 9.76E+07 | 7.43E+07 | NA       | NA       | NA       | NA       | NA       | NA       |
| 1333 | NA       | NA       | 1.09E+08 | 6.11E+07 | 7.91E+05 | 9.32E+05 | NA       | NA       | NA       | NA       |
| 1334 | NA       | NA       | 1.16E+08 | 5.58E+07 | NA       | NA       | NA       | NA       | NA       | NA       |
| 1335 | NA       | NA       | 7.80E+07 | 9.26E+07 | 0.00E+00 | 8.44E+05 | NA       | NA       | NA       | NA       |
| 1336 | NA       | NA       | 1.01E+08 | 6.78E+07 | 1.30E+06 | 9.39E+05 | NA       | NA       | NA       | NA       |
| 1337 | NA       | NA       | 9.19E+07 | 7.82E+07 | 9.70E+05 | 0.00E+00 | NA       | NA       | NA       | NA       |
| 1338 | NA       | NA       | 6.06E+07 | 1.07E+08 | 1.17E+06 | 1.46E+06 | NA       | NA       | NA       | NA       |
| 1339 | NA       | NA       | 1.01E+08 | 6.85E+07 | 8.66E+04 | 7.96E+04 | NA       | NA       | NA       | NA       |
| 1340 | 6.78E+06 | 4.71E+07 | 1.08E+08 | 5.99E+07 | 4.03E+05 | 6.63E+05 | 6.27E-02 | 1.68E+01 | 7.87E-01 | 7.10E+01 |
| 1341 | NA       | NA       | 6.73E+07 | 1.01E+08 | NA       | NA       | NA       | NA       | NA       | NA       |
| 1342 | 0.00E+00 | 0.00E+00 | 7.14E+07 | 9.67E+07 | 2.51E+05 | 0.00E+00 | 0.00E+00 | 0.00E+00 | 0.00E+00 | NA       |
| 1343 | NA       | NA       | 9.19E+07 | 7.63E+07 | NA       | NA       | NA       | NA       | NA       | NA       |
| 1344 | NA       | NA       | 1.03E+08 | 6.40E+07 | 7.19E+05 | 0.00E+00 | NA       | NA       | NA       | NA       |
| 1345 | 2.97E+06 | 0.00E+00 | 9.32E+07 | 7.46E+07 | 1.56E+05 | 1.20E+05 | 3.19E-02 | 1.90E+01 | 0.00E+00 | 0.00E+00 |
| 1346 | NA       | NA       | 1.07E+08 | 6.01E+07 | NA       | NA       | NA       | NA       | NA       | NA       |
| 1347 | NA       | NA       | 7.46E+06 | 1.60E+08 | 0.00E+00 | 0.00E+00 | NA       | NA       | NA       | NA       |
| 1348 | NA       | NA       | 9.96E+07 | 6.65E+07 | 1.19E+05 | 7.43E+05 | NA       | NA       | NA       | NA       |
| 1349 | 3.27E+07 | 0.00E+00 | 6.59E+07 | 9.61E+07 | 1.94E+06 | 2.29E+06 | 4.97E-01 | 1.69E+01 | 0.00E+00 | 0.00E+00 |
| 1350 | NA       | NA       | 5.90E+07 | 1.06E+08 | 0.00E+00 | 1.16E+06 | NA       | NA       | NA       | NA       |
| 1351 | 0.00E+00 | 1.49E+07 | 1.09E+08 | 5.62E+07 | 9.17E+05 | 2.01E+05 | 0.00E+00 | 0.00E+00 | 2.66E-01 | 7.45E+01 |
| 1352 | NA       | NA       | 6.14E+07 | 1.02E+08 | 9.78E+05 | 9.17E+05 | NA       | NA       | NA       | NA       |
| 1353 | NA       | NA       | 1.10E+08 | 5.40E+07 | 4.96E+05 | 3.39E+05 | NA       | NA       | NA       | NA       |
| 1354 | NA       | NA       | 8.00E+07 | 8.22E+07 | 1.07E+06 | 9.17E+05 | NA       | NA       | NA       | NA       |
| 1355 | 4.00E+05 | 2.99E+05 | 8.29E+07 | 8.10E+07 | NA       | NA       | 4.82E-03 | NA       | 3.69E-03 | NA       |
| 1356 | NA       | NA       | 6.77E+07 | 9.50E+07 | 1.01E+06 | 0.00E+00 | NA       | NA       | NA       | NA       |
| 1357 | NA       | NA       | 8.42E+07 | 7.84E+07 | 8.64E+05 | 1.80E+05 | NA       | NA       | NA       | NA       |
| 1358 | NA       | NA       | 9.47E+07 | 6.85E+07 | 0.00E+00 | 0.00E+00 | NA       | NA       | NA       | NA       |
| 1359 | NA       | NA       | 6.57E+07 | 9.68E+07 | 5.07E+05 | 0.00E+00 | NA       | NA       | NA       | NA       |
| 1360 | NA       | NA       | 8.56E+07 | 7.63E+07 | 4.33E+05 | 9.33E+04 | NA       | NA       | NA       | NA       |
| 1361 | NA       | NA       | 7.44E+07 | 8.75E+07 | 2.45E+05 | 0.00E+00 | NA       | NA       | NA       | NA       |
| 1362 | 0.00E+00 | 8.44E+06 | 8.64E+07 | 6.87E+07 | 6.46E+06 | 1.73E+05 | 0.00E+00 | 0.00E+00 | 1.23E-01 | 4.87E+01 |
| 1363 | NA       | NA       | 8.08E+07 | 7.94E+07 | 5.76E+05 | 3.09E+05 | NA       | NA       | NA       | NA       |
| 1364 | NA       | NA       | 8.69E+07 | 7.28E+07 | 9.06E+05 | 2.57E+05 | NA       | NA       | NA       | NA       |

|      |          |          |          |          |          |          |          |          |          |          |
|------|----------|----------|----------|----------|----------|----------|----------|----------|----------|----------|
| 1365 | NA       | NA       | 1.05E+08 | 5.53E+07 | NA       | NA       | NA       | NA       | NA       | NA       |
| 1366 | NA       | NA       | 1.02E+08 | 5.80E+07 | NA       | NA       | NA       | NA       | NA       | NA       |
| 1367 | NA       | NA       | 7.31E+07 | 8.54E+07 | 1.01E+06 | 3.82E+05 | NA       | NA       | NA       | NA       |
| 1368 | NA       | NA       | 7.89E+07 | 7.85E+07 | 8.57E+05 | 1.00E+06 | NA       | NA       | NA       | NA       |
| 1369 | 1.46E+07 | 0.00E+00 | 4.86E+07 | 1.08E+08 | 7.86E+05 | 1.51E+06 | 3.00E-01 | 1.86E+01 | 0.00E+00 | 0.00E+00 |
| 1370 | NA       | NA       | 7.28E+07 | 8.46E+07 | 8.14E+05 | 2.43E+05 | NA       | NA       | NA       | NA       |
| 1371 | 1.02E+07 | 0.00E+00 | 1.05E+08 | 5.00E+07 | 1.69E+06 | 4.82E+05 | 9.74E-02 | 6.06E+00 | 0.00E+00 | 0.00E+00 |
| 1372 | NA       | NA       | 9.20E+07 | 6.10E+07 | 2.44E+06 | 1.47E+06 | NA       | NA       | NA       | NA       |
| 1373 | NA       | NA       | 8.16E+07 | 7.49E+07 | 0.00E+00 | 0.00E+00 | NA       | NA       | NA       | NA       |
| 1374 | NA       | NA       | 5.64E+07 | 9.98E+07 | 0.00E+00 | 0.00E+00 | NA       | NA       | NA       | NA       |
| 1375 | NA       | NA       | 1.03E+08 | 5.18E+07 | 9.44E+05 | 0.00E+00 | NA       | NA       | NA       | NA       |
| 1376 | 3.71E+06 | 3.52E+05 | 6.98E+07 | 8.39E+07 | 5.95E+05 | 6.54E+05 | 5.32E-02 | 6.25E+00 | 4.20E-03 | 5.38E-01 |
| 1377 | NA       | NA       | 1.36E+08 | 1.85E+07 | 0.00E+00 | 0.00E+00 | NA       | NA       | NA       | NA       |
| 1378 | NA       | NA       | 1.03E+08 | 5.13E+07 | NA       | NA       | NA       | NA       | NA       | NA       |
| 1379 | 0.00E+00 | 2.32E+05 | 1.01E+08 | 4.96E+07 | 2.75E+06 | 0.00E+00 | 0.00E+00 | 0.00E+00 | 4.67E-03 | Inf      |
| 1380 | 4.59E+06 | 2.55E+08 | 1.10E+08 | 4.25E+07 | 5.29E+05 | 7.40E+04 | 4.18E-02 | 8.68E+00 | 6.02E+00 | 3.45E+03 |
| 1381 | 6.92E+05 | 0.00E+00 | 4.98E+07 | 1.02E+08 | 2.42E+05 | 0.00E+00 | 1.39E-02 | 2.86E+00 | 0.00E+00 | NA       |
| 1382 | 5.88E+06 | 0.00E+00 | 7.52E+07 | 7.53E+07 | 3.36E+05 | 1.41E+06 | 7.82E-02 | 1.75E+01 | 0.00E+00 | 0.00E+00 |
| 1383 | 0.00E+00 | 1.39E+07 | 1.04E+08 | 4.84E+07 | 0.00E+00 | 0.00E+00 | 0.00E+00 | NA       | 2.87E-01 | Inf      |
| 1384 | 0.00E+00 | 3.98E+05 | 9.34E+07 | 5.73E+07 | 4.88E+05 | 0.00E+00 | 0.00E+00 | 0.00E+00 | 6.94E-03 | Inf      |
| 1385 | NA       | NA       | 7.50E+07 | 7.55E+07 | 5.54E+05 | 7.64E+04 | NA       | NA       | NA       | NA       |
| 1386 | NA       | NA       | 9.16E+07 | 5.83E+07 | 9.29E+05 | 0.00E+00 | NA       | NA       | NA       | NA       |
| 1387 | NA       | NA       | 8.18E+07 | 6.78E+07 | 1.05E+06 | 2.17E+05 | NA       | NA       | NA       | NA       |
| 1388 | NA       | NA       | 1.08E+08 | 4.28E+07 | 0.00E+00 | 2.78E+05 | NA       | NA       | NA       | NA       |
| 1389 | NA       | NA       | 7.93E+07 | 7.10E+07 | NA       | NA       | NA       | NA       | NA       | NA       |
| 1390 | NA       | NA       | 7.41E+07 | 7.51E+07 | 6.35E+05 | 2.83E+05 | NA       | NA       | NA       | NA       |
| 1391 | NA       | NA       | 9.29E+07 | 5.64E+07 | 2.73E+05 | 2.80E+05 | NA       | NA       | NA       | NA       |
| 1392 | 0.00E+00 | 1.30E+07 | 6.46E+07 | 8.43E+07 | 8.73E+05 | 0.00E+00 | 0.00E+00 | 0.00E+00 | 1.55E-01 | Inf      |
| 1393 | NA       | NA       | 6.88E+07 | 7.93E+07 | 4.47E+05 | 6.82E+05 | NA       | NA       | NA       | NA       |
| 1394 | 0.00E+00 | 8.04E+05 | 8.92E+07 | 5.82E+07 | 4.74E+05 | 4.38E+05 | 0.00E+00 | 0.00E+00 | 1.38E-02 | 1.83E+00 |
| 1395 | 3.17E+06 | 6.47E+06 | 7.30E+07 | 7.52E+07 | 1.25E+05 | 0.00E+00 | 4.34E-02 | 2.53E+01 | 8.60E-02 | Inf      |
| 1396 | 1.85E+07 | 0.00E+00 | 5.79E+07 | 8.92E+07 | 7.09E+05 | 2.52E+05 | 3.20E-01 | 2.62E+01 | 0.00E+00 | 0.00E+00 |
| 1397 | 1.58E+06 | 0.00E+00 | 9.53E+07 | 5.11E+07 | 9.93E+05 | 6.27E+05 | 1.66E-02 | 1.59E+00 | 0.00E+00 | 0.00E+00 |
| 1398 | NA       | NA       | 8.61E+07 | 6.15E+07 | NA       | NA       | NA       | NA       | NA       | NA       |
| 1399 | NA       | NA       | 7.46E+07 | 7.21E+07 | 4.91E+05 | 4.03E+05 | NA       | NA       | NA       | NA       |
| 1400 | 0.00E+00 | 1.13E+07 | 8.52E+07 | 5.54E+07 | 4.26E+06 | 1.11E+06 | 0.00E+00 | 0.00E+00 | 2.04E-01 | 1.02E+01 |
| 1401 | 0.00E+00 | 1.54E+06 | 8.48E+07 | 6.01E+07 | 2.98E+04 | 1.52E+05 | 0.00E+00 | 0.00E+00 | 2.56E-02 | 1.01E+01 |
| 1402 | NA       | NA       | 7.45E+07 | 6.90E+07 | 0.00E+00 | 6.01E+05 | NA       | NA       | NA       | NA       |

|      |          |          |          |          |          |          |          |          |          |          |
|------|----------|----------|----------|----------|----------|----------|----------|----------|----------|----------|
| 1403 | NA       | NA       | 8.33E+07 | 5.96E+07 | 6.89E+05 | 4.21E+05 | NA       | NA       | NA       | NA       |
| 1404 | NA       | NA       | 7.30E+07 | 6.95E+07 | 8.60E+05 | 4.62E+05 | NA       | NA       | NA       | NA       |
| 1405 | NA       | NA       | 7.75E+07 | 6.45E+07 | 6.14E+05 | 2.47E+05 | NA       | NA       | NA       | NA       |
| 1406 | NA       | NA       | 7.53E+07 | 6.69E+07 | 2.73E+05 | 2.38E+05 | NA       | NA       | NA       | NA       |
| 1407 | 2.09E+06 | 0.00E+00 | 5.94E+07 | 8.20E+07 | 8.01E+05 | 1.18E+05 | 3.52E-02 | 2.61E+00 | 0.00E+00 | 0.00E+00 |
| 1408 | NA       | NA       | 5.62E+07 | 8.39E+07 | 1.79E+06 | 0.00E+00 | NA       | NA       | NA       | NA       |
| 1409 | NA       | NA       | 1.07E+08 | 3.40E+07 | 3.05E+05 | 7.13E+05 | NA       | NA       | NA       | NA       |
| 1410 | NA       | NA       | 8.49E+07 | 5.53E+07 | 4.80E+05 | 7.16E+05 | NA       | NA       | NA       | NA       |
| 1411 | NA       | NA       | 1.02E+08 | 3.83E+07 | NA       | NA       | NA       | NA       | NA       | NA       |
| 1412 | NA       | NA       | 7.74E+07 | 6.22E+07 | NA       | NA       | NA       | NA       | NA       | NA       |
| 1413 | 1.50E+06 | 4.59E+05 | 3.84E+07 | 9.95E+07 | 8.45E+05 | 6.29E+05 | 3.91E-02 | 1.78E+00 | 4.62E-03 | 7.31E-01 |
| 1414 | NA       | NA       | 8.70E+07 | 5.23E+07 | NA       | NA       | NA       | NA       | NA       | NA       |
| 1415 | NA       | NA       | 5.71E+07 | 7.96E+07 | 1.61E+06 | 8.30E+05 | NA       | NA       | NA       | NA       |
| 1416 | NA       | NA       | 5.25E+07 | 8.57E+07 | 7.07E+05 | 0.00E+00 | NA       | NA       | NA       | NA       |
| 1417 | 4.42E+06 | 0.00E+00 | 6.04E+07 | 7.57E+07 | 1.46E+06 | 5.93E+05 | 7.32E-02 | 3.03E+00 | 0.00E+00 | 0.00E+00 |
| 1418 | NA       | NA       | 8.27E+07 | 5.46E+07 | 7.36E+05 | 1.60E+05 | NA       | NA       | NA       | NA       |
| 1419 | NA       | NA       | 8.39E+07 | 5.41E+07 | NA       | NA       | NA       | NA       | NA       | NA       |
| 1420 | NA       | NA       | 7.21E+07 | 6.47E+07 | 2.17E+05 | 8.99E+05 | NA       | NA       | NA       | NA       |
| 1421 | NA       | NA       | 5.48E+07 | 8.20E+07 | 7.66E+05 | 0.00E+00 | NA       | NA       | NA       | NA       |
| 1422 | NA       | NA       | 6.72E+07 | 7.02E+07 | 0.00E+00 | 5.89E+04 | NA       | NA       | NA       | NA       |
| 1423 | NA       | NA       | 6.60E+07 | 7.07E+07 | 6.01E+05 | 0.00E+00 | NA       | NA       | NA       | NA       |
| 1424 | 2.67E+08 | 0.00E+00 | NA       | NA       | 1.03E+08 | 3.44E+07 | NA       | 2.60E+00 | NA       | 0.00E+00 |
| 1425 | NA       | NA       | 6.48E+07 | 7.21E+07 | 1.38E+05 | 9.14E+04 | NA       | NA       | NA       | NA       |
| 1426 | NA       | NA       | 7.56E+07 | 6.14E+07 | 0.00E+00 | 0.00E+00 | NA       | NA       | NA       | NA       |
| 1427 | NA       | NA       | 8.00E+07 | 5.67E+07 | NA       | NA       | NA       | NA       | NA       | NA       |
| 1428 | 0.00E+00 | 9.19E+07 | 6.68E+07 | 6.90E+07 | NA       | NA       | 0.00E+00 | NA       | 1.33E+00 | NA       |
| 1429 | NA       | NA       | 5.63E+07 | 7.79E+07 | NA       | NA       | NA       | NA       | NA       | NA       |
| 1430 | NA       | NA       | 7.29E+07 | 6.09E+07 | 0.00E+00 | 0.00E+00 | NA       | NA       | NA       | NA       |
| 1431 | NA       | NA       | 6.51E+07 | 6.69E+07 | 6.96E+05 | 0.00E+00 | NA       | NA       | NA       | NA       |
| 1432 | NA       | NA       | 7.56E+07 | 5.53E+07 | 7.18E+05 | 0.00E+00 | NA       | NA       | NA       | NA       |
| 1433 | NA       | NA       | 4.74E+07 | 8.41E+07 | NA       | NA       | NA       | NA       | NA       | NA       |
| 1434 | NA       | NA       | 5.72E+07 | 7.41E+07 | 0.00E+00 | 9.56E+04 | NA       | NA       | NA       | NA       |
| 1435 | NA       | NA       | 1.11E+08 | 2.00E+07 | NA       | NA       | NA       | NA       | NA       | NA       |
| 1436 | NA       | NA       | 8.03E+07 | 4.90E+07 | 3.62E+05 | 2.01E+05 | NA       | NA       | NA       | NA       |
| 1437 | NA       | NA       | 8.38E+07 | 4.46E+07 | 8.58E+04 | 2.72E+05 | NA       | NA       | NA       | NA       |
| 1438 | NA       | NA       | 9.78E+07 | 3.00E+07 | 3.47E+05 | 6.43E+05 | NA       | NA       | NA       | NA       |
| 1439 | NA       | NA       | 8.62E+07 | 4.22E+07 | 0.00E+00 | 0.00E+00 | NA       | NA       | NA       | NA       |
| 1440 | NA       | NA       | 6.94E+07 | 5.80E+07 | 0.00E+00 | 6.00E+05 | NA       | NA       | NA       | NA       |

|      |          |          |          |          |          |          |          |          |          |          |
|------|----------|----------|----------|----------|----------|----------|----------|----------|----------|----------|
| 1441 | NA       | NA       | 6.61E+07 | 6.02E+07 | 1.24E+06 | 0.00E+00 | NA       | NA       | NA       | NA       |
| 1442 | NA       | NA       | 5.40E+07 | 7.13E+07 | 1.70E+06 | 2.64E+05 | NA       | NA       | NA       | NA       |
| 1443 | NA       | NA       | 8.38E+07 | 4.27E+07 | 0.00E+00 | 2.29E+05 | NA       | NA       | NA       | NA       |
| 1444 | NA       | NA       | 7.10E+07 | 5.44E+07 | 1.15E+06 | 7.29E+04 | NA       | NA       | NA       | NA       |
| 1445 | NA       | NA       | 7.72E+07 | 4.91E+07 | 0.00E+00 | 0.00E+00 | NA       | NA       | NA       | NA       |
| 1446 | NA       | NA       | 8.52E+07 | 3.97E+07 | 5.69E+05 | 0.00E+00 | NA       | NA       | NA       | NA       |
| 1447 | 0.00E+00 | 4.10E+06 | 7.31E+07 | 5.09E+07 | 1.28E+06 | 0.00E+00 | 0.00E+00 | 0.00E+00 | 8.04E-02 | Inf      |
| 1448 | 1.58E+07 | 2.93E+06 | 6.66E+07 | 5.64E+07 | 1.44E+06 | 5.68E+05 | 2.37E-01 | 1.10E+01 | 5.19E-02 | 5.15E+00 |
| 1449 | NA       | NA       | 6.58E+07 | 5.90E+07 | 1.81E+05 | 0.00E+00 | NA       | NA       | NA       | NA       |
| 1450 | NA       | NA       | 6.53E+07 | 5.95E+07 | NA       | NA       | NA       | NA       | NA       | NA       |
| 1451 | NA       | NA       | 6.63E+07 | 5.83E+07 | 0.00E+00 | 0.00E+00 | NA       | NA       | NA       | NA       |
| 1452 | NA       | NA       | 5.96E+07 | 6.43E+07 | 4.09E+05 | 3.60E+04 | NA       | NA       | NA       | NA       |
| 1453 | NA       | NA       | 8.62E+07 | 3.70E+07 | 9.82E+05 | 0.00E+00 | NA       | NA       | NA       | NA       |
| 1454 | NA       | NA       | 5.82E+07 | 6.20E+07 | 3.04E+06 | 3.62E+05 | NA       | NA       | NA       | NA       |
| 1455 | NA       | NA       | 6.36E+07 | 5.96E+07 | 0.00E+00 | 3.56E+05 | NA       | NA       | NA       | NA       |
| 1456 | NA       | NA       | 8.40E+07 | 3.93E+07 | 0.00E+00 | 1.87E+05 | NA       | NA       | NA       | NA       |
| 1457 | NA       | NA       | 9.27E+07 | 3.02E+07 | NA       | NA       | NA       | NA       | NA       | NA       |
| 1458 | NA       | NA       | 5.28E+07 | 6.99E+07 | NA       | NA       | NA       | NA       | NA       | NA       |
| 1459 | NA       | NA       | 4.80E+07 | 7.39E+07 | 4.14E+05 | 7.87E+04 | NA       | NA       | NA       | NA       |
| 1460 | NA       | NA       | 6.73E+07 | 5.04E+07 | 2.21E+06 | 1.69E+06 | NA       | NA       | NA       | NA       |
| 1461 | NA       | NA       | 7.50E+07 | 4.38E+07 | 2.41E+06 | 4.60E+05 | NA       | NA       | NA       | NA       |
| 1462 | NA       | NA       | 7.20E+07 | 4.96E+07 | NA       | NA       | NA       | NA       | NA       | NA       |
| 1463 | NA       | NA       | 5.28E+07 | 6.62E+07 | 1.45E+06 | 4.34E+05 | NA       | NA       | NA       | NA       |
| 1464 | NA       | NA       | 6.25E+07 | 5.53E+07 | 1.27E+06 | 9.72E+05 | NA       | NA       | NA       | NA       |
| 1465 | NA       | NA       | 3.22E+07 | 8.57E+07 | 1.24E+06 | 0.00E+00 | NA       | NA       | NA       | NA       |
| 1466 | NA       | NA       | 9.62E+07 | 2.20E+07 | 2.95E+05 | 4.68E+05 | NA       | NA       | NA       | NA       |
| 1467 | 2.39E+06 | 0.00E+00 | 6.04E+07 | 5.67E+07 | 1.07E+06 | 3.74E+05 | 3.95E-02 | 2.23E+00 | 0.00E+00 | 0.00E+00 |
| 1468 | NA       | NA       | 6.74E+07 | 5.10E+07 | NA       | NA       | NA       | NA       | NA       | NA       |
| 1469 | 1.11E+06 | 1.03E+06 | 4.07E+07 | 7.47E+07 | 1.37E+06 | 1.43E+06 | 2.74E-02 | 8.15E-01 | 1.38E-02 | 7.18E-01 |
| 1470 | NA       | NA       | 6.30E+07 | 5.43E+07 | 5.35E+05 | 2.14E+05 | NA       | NA       | NA       | NA       |
| 1471 | 2.97E+05 | 0.00E+00 | 7.60E+07 | 4.04E+07 | 6.28E+05 | 9.66E+05 | 3.90E-03 | 4.72E-01 | 0.00E+00 | 0.00E+00 |
| 1472 | NA       | NA       | 5.25E+07 | 6.52E+07 | NA       | NA       | NA       | NA       | NA       | NA       |
| 1473 | 0.00E+00 | 1.17E+08 | NA       | NA       | 0.00E+00 | 0.00E+00 | NA       | NA       | NA       | Inf      |
| 1474 | NA       | NA       | 6.66E+07 | 4.94E+07 | NA       | NA       | NA       | NA       | NA       | NA       |
| 1475 | NA       | NA       | 7.96E+07 | 3.57E+07 | 4.13E+04 | 2.62E+05 | NA       | NA       | NA       | NA       |
| 1476 | NA       | NA       | 5.68E+07 | 5.84E+07 | 0.00E+00 | 1.75E+05 | NA       | NA       | NA       | NA       |
| 1477 | NA       | NA       | 6.90E+07 | 4.58E+07 | NA       | NA       | NA       | NA       | NA       | NA       |
| 1478 | NA       | NA       | 4.84E+07 | 6.51E+07 | 7.55E+05 | 0.00E+00 | NA       | NA       | NA       | NA       |

|      |          |          |          |          |          |          |          |          |          |          |
|------|----------|----------|----------|----------|----------|----------|----------|----------|----------|----------|
| 1479 | NA       | NA       | 7.09E+07 | 4.14E+07 | 5.71E+05 | 1.35E+06 | NA       | NA       | NA       | NA       |
| 1480 | NA       | NA       | 5.90E+07 | 5.28E+07 | 1.21E+06 | 6.41E+05 | NA       | NA       | NA       | NA       |
| 1481 | NA       | NA       | 7.28E+07 | 3.76E+07 | 8.29E+05 | 1.41E+06 | NA       | NA       | NA       | NA       |
| 1482 | NA       | NA       | 5.64E+07 | 5.61E+07 | NA       | NA       | NA       | NA       | NA       | NA       |
| 1483 | NA       | NA       | 6.53E+07 | 4.69E+07 | 0.00E+00 | 1.81E+05 | NA       | NA       | NA       | NA       |
| 1484 | NA       | NA       | 5.24E+07 | 5.85E+07 | 3.41E+05 | 5.18E+05 | NA       | NA       | NA       | NA       |
| 1485 | NA       | NA       | 5.39E+07 | 5.69E+07 | 8.83E+05 | 0.00E+00 | NA       | NA       | NA       | NA       |
| 1486 | NA       | NA       | 4.39E+07 | 6.50E+07 | 8.61E+05 | 1.38E+06 | NA       | NA       | NA       | NA       |
| 1487 | NA       | NA       | 5.79E+07 | 5.28E+07 | NA       | NA       | NA       | NA       | NA       | NA       |
| 1488 | NA       | NA       | 5.41E+07 | 5.53E+07 | 5.39E+05 | 6.17E+05 | NA       | NA       | NA       | NA       |
| 1489 | NA       | NA       | 3.86E+07 | 6.98E+07 | 8.69E+05 | 8.93E+05 | NA       | NA       | NA       | NA       |
| 1490 | 7.80E+06 | 2.43E+06 | 4.52E+07 | 2.87E+07 | 1.54E+07 | 2.05E+07 | 1.73E-01 | 5.05E-01 | 8.47E-02 | 1.19E-01 |
| 1491 | 1.23E+07 | 0.00E+00 | 3.18E+07 | 7.49E+07 | 8.53E+05 | 1.07E+06 | 3.88E-01 | 1.45E+01 | 0.00E+00 | 0.00E+00 |
| 1492 | NA       | NA       | 3.66E+07 | 7.17E+07 | 0.00E+00 | 2.28E+05 | NA       | NA       | NA       | NA       |
| 1493 | NA       | NA       | 5.19E+07 | 5.51E+07 | 1.89E+05 | 3.12E+05 | NA       | NA       | NA       | NA       |
| 1494 | NA       | NA       | 4.41E+07 | 6.31E+07 | NA       | NA       | NA       | NA       | NA       | NA       |
| 1495 | NA       | NA       | 4.12E+07 | 6.55E+07 | 5.85E+04 | 3.64E+05 | NA       | NA       | NA       | NA       |
| 1496 | 2.82E+06 | 0.00E+00 | 5.80E+07 | 4.84E+07 | 2.11E+05 | 3.65E+05 | 4.87E-02 | 1.34E+01 | 0.00E+00 | 0.00E+00 |
| 1497 | NA       | NA       | 7.86E+07 | 2.78E+07 | 0.00E+00 | 4.20E+05 | NA       | NA       | NA       | NA       |
| 1498 | 1.13E+07 | 0.00E+00 | 4.74E+07 | 5.85E+07 | 5.91E+05 | 2.31E+05 | 2.38E-01 | 1.91E+01 | 0.00E+00 | 0.00E+00 |
| 1499 | 5.52E+05 | 0.00E+00 | 3.68E+07 | 6.75E+07 | 1.62E+06 | 6.69E+05 | 1.50E-02 | 3.41E-01 | 0.00E+00 | 0.00E+00 |
| 1500 | NA       | NA       | 6.35E+07 | 4.08E+07 | 1.64E+06 | 4.06E+05 | NA       | NA       | NA       | NA       |
| 1501 | 2.83E+06 | 3.07E+06 | 7.14E+07 | 3.12E+07 | 8.81E+05 | 2.52E+06 | 3.96E-02 | 3.21E+00 | 9.85E-02 | 1.22E+00 |
| 1502 | NA       | NA       | 4.44E+07 | 6.08E+07 | 5.34E+05 | 1.30E+05 | NA       | NA       | NA       | NA       |
| 1503 | 0.00E+00 | 1.89E+05 | 3.41E+07 | 6.79E+07 | 1.78E+06 | 9.76E+05 | 0.00E+00 | 0.00E+00 | 2.79E-03 | 1.94E-01 |
| 1504 | NA       | NA       | 4.98E+07 | 5.42E+07 | 3.60E+05 | 1.23E+05 | NA       | NA       | NA       | NA       |
| 1505 | NA       | NA       | 4.94E+07 | 5.44E+07 | 4.74E+05 | 0.00E+00 | NA       | NA       | NA       | NA       |
| 1506 | NA       | NA       | 4.86E+07 | 5.57E+07 | NA       | NA       | NA       | NA       | NA       | NA       |
| 1507 | NA       | NA       | 3.83E+07 | 6.50E+07 | 8.12E+05 | 1.74E+05 | NA       | NA       | NA       | NA       |
| 1508 | NA       | NA       | 5.55E+07 | 4.70E+07 | 2.34E+05 | 7.14E+05 | NA       | NA       | NA       | NA       |
| 1509 | NA       | NA       | 6.13E+07 | 4.20E+07 | NA       | NA       | NA       | NA       | NA       | NA       |
| 1510 | NA       | NA       | 2.49E+07 | 7.82E+07 | 6.87E+04 | 9.84E+04 | NA       | NA       | NA       | NA       |
| 1511 | NA       | NA       | 5.23E+07 | 5.03E+07 | 5.30E+05 | 0.00E+00 | NA       | NA       | NA       | NA       |
| 1512 | NA       | NA       | 4.14E+07 | 6.00E+07 | 6.20E+05 | 9.33E+05 | NA       | NA       | NA       | NA       |
| 1513 | NA       | NA       | 4.63E+07 | 5.60E+07 | 1.59E+05 | 2.03E+05 | NA       | NA       | NA       | NA       |
| 1514 | NA       | NA       | 5.84E+07 | 4.34E+07 | 0.00E+00 | 2.53E+05 | NA       | NA       | NA       | NA       |
| 1515 | NA       | NA       | 5.27E+07 | 4.89E+07 | NA       | NA       | NA       | NA       | NA       | NA       |
| 1516 | NA       | NA       | 3.08E+07 | 7.01E+07 | 5.48E+05 | 6.33E+04 | NA       | NA       | NA       | NA       |



|      |          |          |          |          |          |          |          |          |          |          |
|------|----------|----------|----------|----------|----------|----------|----------|----------|----------|----------|
| 1517 | NA       | NA       | 7.14E+07 | 2.91E+07 | 6.04E+05 | 4.45E+05 | NA       | NA       | NA       | NA       |
| 1518 | NA       | NA       | 6.15E+07 | 3.95E+07 | 0.00E+00 | 3.09E+05 | NA       | NA       | NA       | NA       |
| 1519 | NA       | NA       | 5.26E+07 | 4.80E+07 | NA       | NA       | NA       | NA       | NA       | NA       |
| 1520 | NA       | NA       | 4.64E+07 | 5.29E+07 | 2.77E+05 | 0.00E+00 | NA       | NA       | NA       | NA       |
| 1521 | 0.00E+00 | 2.09E+06 | 5.65E+07 | 4.14E+07 | 1.52E+05 | 2.00E+05 | 0.00E+00 | 0.00E+00 | 5.04E-02 | 1.05E+01 |
| 1522 | NA       | NA       | 6.30E+07 | 3.43E+07 | 5.77E+05 | 0.00E+00 | NA       | NA       | NA       | NA       |
| 1523 | NA       | NA       | 4.45E+07 | 5.25E+07 | 4.59E+05 | 0.00E+00 | NA       | NA       | NA       | NA       |
| 1524 | NA       | NA       | 4.83E+07 | 4.85E+07 | NA       | NA       | NA       | NA       | NA       | NA       |
| 1525 | NA       | NA       | 4.23E+07 | 5.38E+07 | 0.00E+00 | 5.65E+05 | NA       | NA       | NA       | NA       |
| 1526 | NA       | NA       | 4.17E+07 | 5.05E+07 | 4.00E+06 | 2.53E+05 | NA       | NA       | NA       | NA       |
| 1527 | NA       | NA       | 5.39E+07 | 4.23E+07 | NA       | NA       | NA       | NA       | NA       | NA       |
| 1528 | NA       | NA       | 4.74E+07 | 4.73E+07 | 9.05E+05 | 6.20E+05 | NA       | NA       | NA       | NA       |
| 1529 | NA       | NA       | 5.48E+07 | 3.95E+07 | 1.48E+06 | 2.35E+05 | NA       | NA       | NA       | NA       |
| 1530 | NA       | NA       | 9.50E+07 | 0.00E+00 | NA       | NA       | NA       | NA       | NA       | NA       |
| 1531 | NA       | NA       | 5.33E+07 | 4.16E+07 | NA       | NA       | NA       | NA       | NA       | NA       |
| 1532 | NA       | NA       | 5.29E+07 | 4.17E+07 | NA       | NA       | NA       | NA       | NA       | NA       |
| 1533 | NA       | NA       | 5.60E+07 | 3.86E+07 | NA       | NA       | NA       | NA       | NA       | NA       |
| 1534 | NA       | NA       | 6.27E+07 | 3.12E+07 | 3.47E+05 | 1.72E+05 | NA       | NA       | NA       | NA       |
| 1535 | NA       | NA       | 4.69E+07 | 4.69E+07 | NA       | NA       | NA       | NA       | NA       | NA       |
| 1536 | NA       | NA       | 4.78E+07 | 2.34E+07 | 1.06E+07 | 1.18E+07 | NA       | NA       | NA       | NA       |
| 1537 | NA       | NA       | 4.39E+07 | 4.81E+07 | 7.87E+05 | 4.91E+05 | NA       | NA       | NA       | NA       |
| 1538 | NA       | NA       | 3.06E+07 | 6.25E+07 | 0.00E+00 | 0.00E+00 | NA       | NA       | NA       | NA       |
| 1539 | NA       | NA       | 3.71E+07 | 5.60E+07 | NA       | NA       | NA       | NA       | NA       | NA       |
| 1540 | NA       | NA       | 4.78E+07 | 4.44E+07 | 1.16E+05 | 7.37E+05 | NA       | NA       | NA       | NA       |
| 1541 | NA       | NA       | 6.00E+07 | 3.28E+07 | 0.00E+00 | 1.90E+05 | NA       | NA       | NA       | NA       |
| 1542 | NA       | NA       | 6.50E+07 | 2.79E+07 | NA       | NA       | NA       | NA       | NA       | NA       |
| 1543 | NA       | NA       | 5.02E+07 | 4.21E+07 | 5.82E+05 | 0.00E+00 | NA       | NA       | NA       | NA       |
| 1544 | NA       | NA       | 5.22E+07 | 3.92E+07 | 9.88E+05 | 4.50E+05 | NA       | NA       | NA       | NA       |
| 1545 | NA       | NA       | 5.64E+07 | 3.53E+07 | 1.99E+05 | 6.06E+05 | NA       | NA       | NA       | NA       |
| 1546 | 0.00E+00 | 4.14E+05 | 5.66E+07 | 3.57E+07 | NA       | NA       | 0.00E+00 | NA       | 1.16E-02 | NA       |
| 1547 | 7.25E+06 | 5.20E+06 | 5.25E+07 | 3.81E+07 | 4.02E+05 | 9.56E+05 | 1.38E-01 | 1.80E+01 | 1.36E-01 | 5.44E+00 |
| 1548 | NA       | NA       | 5.33E+07 | 3.71E+07 | 4.35E+05 | 1.67E+05 | NA       | NA       | NA       | NA       |
| 1549 | NA       | NA       | 3.20E+07 | 5.74E+07 | 0.00E+00 | 1.12E+06 | NA       | NA       | NA       | NA       |
| 1550 | NA       | NA       | 4.67E+07 | 4.36E+07 | NA       | NA       | NA       | NA       | NA       | NA       |
| 1551 | NA       | NA       | 2.22E+07 | 6.78E+07 | NA       | NA       | NA       | NA       | NA       | NA       |
| 1552 | NA       | NA       | 3.22E+07 | 5.66E+07 | 3.91E+05 | 7.45E+05 | NA       | NA       | NA       | NA       |
| 1553 | NA       | NA       | 5.03E+07 | 3.96E+07 | NA       | NA       | NA       | NA       | NA       | NA       |
| 1554 | NA       | NA       | 7.53E+07 | 1.28E+07 | 1.11E+06 | 3.55E+05 | NA       | NA       | NA       | NA       |

|      |          |          |          |          |          |          |          |          |          |          |
|------|----------|----------|----------|----------|----------|----------|----------|----------|----------|----------|
| 1555 | NA       | NA       | 5.98E+07 | 2.97E+07 | 1.35E+05 | 0.00E+00 | NA       | NA       | NA       | NA       |
| 1556 | NA       | NA       | 5.37E+07 | 3.41E+07 | 6.99E+05 | 3.63E+05 | NA       | NA       | NA       | NA       |
| 1557 | NA       | NA       | NA       | NA       | 2.78E+07 | 6.07E+07 | NA       | NA       | NA       | NA       |
| 1558 | NA       | NA       | 6.63E+07 | 2.09E+07 | 3.85E+05 | 3.10E+05 | NA       | NA       | NA       | NA       |
| 1559 | NA       | NA       | 3.50E+07 | 5.27E+07 | NA       | NA       | NA       | NA       | NA       | NA       |
| 1560 | NA       | NA       | 4.85E+07 | 3.91E+07 | NA       | NA       | NA       | NA       | NA       | NA       |
| 1561 | NA       | NA       | 4.71E+07 | 4.04E+07 | NA       | NA       | NA       | NA       | NA       | NA       |
| 1562 | NA       | NA       | 5.66E+07 | 3.06E+07 | NA       | NA       | NA       | NA       | NA       | NA       |
| 1563 | NA       | NA       | 4.43E+07 | 4.28E+07 | 0.00E+00 | 0.00E+00 | NA       | NA       | NA       | NA       |
| 1564 | NA       | NA       | 6.93E+07 | 1.78E+07 | NA       | NA       | NA       | NA       | NA       | NA       |
| 1565 | NA       | NA       | 4.78E+07 | 3.89E+07 | 0.00E+00 | 0.00E+00 | NA       | NA       | NA       | NA       |
| 1566 | 2.57E+08 | 3.21E+08 | NA       | NA       | 5.05E+07 | 3.55E+07 | NA       | 5.08E+00 | NA       | 9.04E+00 |
| 1567 | NA       | NA       | 5.03E+07 | 3.54E+07 | 8.39E+04 | 0.00E+00 | NA       | NA       | NA       | NA       |
| 1568 | NA       | NA       | 5.22E+07 | 3.30E+07 | 0.00E+00 | 3.94E+05 | NA       | NA       | NA       | NA       |
| 1569 | NA       | NA       | 4.52E+07 | 3.81E+07 | 1.28E+06 | 7.26E+05 | NA       | NA       | NA       | NA       |
| 1570 | NA       | NA       | 4.97E+07 | 3.56E+07 | NA       | NA       | NA       | NA       | NA       | NA       |
| 1571 | NA       | NA       | 4.37E+07 | 4.06E+07 | NA       | NA       | NA       | NA       | NA       | NA       |
| 1572 | NA       | NA       | 5.11E+07 | 3.30E+07 | 5.48E+04 | 0.00E+00 | NA       | NA       | NA       | NA       |
| 1573 | NA       | NA       | 5.70E+07 | 2.69E+07 | NA       | NA       | NA       | NA       | NA       | NA       |
| 1574 | NA       | NA       | 4.99E+07 | 3.40E+07 | NA       | NA       | NA       | NA       | NA       | NA       |
| 1575 | NA       | NA       | 4.22E+07 | 4.13E+07 | NA       | NA       | NA       | NA       | NA       | NA       |
| 1576 | NA       | NA       | 2.31E+07 | 5.86E+07 | NA       | NA       | NA       | NA       | NA       | NA       |
| 1577 | NA       | NA       | 4.64E+07 | 3.46E+07 | 4.65E+05 | 0.00E+00 | NA       | NA       | NA       | NA       |
| 1578 | 0.00E+00 | 1.20E+06 | 1.34E+07 | 6.77E+07 | 0.00E+00 | 0.00E+00 | 0.00E+00 | NA       | 1.78E-02 | Inf      |
| 1579 | 0.00E+00 | 4.22E+06 | 3.98E+07 | 3.98E+07 | 1.37E+06 | 8.08E+04 | 0.00E+00 | 0.00E+00 | 1.06E-01 | 5.22E+01 |
| 1580 | NA       | NA       | 5.42E+07 | 2.61E+07 | 0.00E+00 | 0.00E+00 | NA       | NA       | NA       | NA       |
| 1581 | NA       | NA       | 5.89E+07 | 2.14E+07 | NA       | NA       | NA       | NA       | NA       | NA       |
| 1582 | 0.00E+00 | 4.97E+05 | 5.20E+07 | 2.60E+07 | 8.00E+05 | 4.09E+05 | 0.00E+00 | 0.00E+00 | 1.91E-02 | 1.22E+00 |
| 1583 | NA       | NA       | 4.03E+07 | 3.80E+07 | 3.88E+05 | 2.57E+05 | NA       | NA       | NA       | NA       |
| 1584 | NA       | NA       | 4.84E+07 | 2.93E+07 | 6.69E+05 | 1.65E+05 | NA       | NA       | NA       | NA       |
| 1585 | NA       | NA       | 4.52E+07 | 3.29E+07 | 9.27E+04 | 1.49E+05 | NA       | NA       | NA       | NA       |
| 1586 | NA       | NA       | 3.90E+07 | 3.84E+07 | 1.07E+05 | 5.75E+05 | NA       | NA       | NA       | NA       |
| 1587 | NA       | NA       | 6.02E+07 | 1.64E+07 | 0.00E+00 | 0.00E+00 | NA       | NA       | NA       | NA       |
| 1588 | NA       | NA       | 4.60E+07 | 3.06E+07 | NA       | NA       | NA       | NA       | NA       | NA       |
| 1589 | NA       | NA       | 3.48E+07 | 4.15E+07 | 3.21E+05 | 0.00E+00 | NA       | NA       | NA       | NA       |
| 1590 | NA       | NA       | 4.30E+07 | 3.31E+07 | NA       | NA       | NA       | NA       | NA       | NA       |
| 1591 | NA       | NA       | 3.99E+07 | 3.59E+07 | 0.00E+00 | 0.00E+00 | NA       | NA       | NA       | NA       |
| 1592 | NA       | NA       | 3.23E+07 | 4.31E+07 | 0.00E+00 | 7.14E+04 | NA       | NA       | NA       | NA       |

|      |          |          |          |          |          |          |          |          |          |          |
|------|----------|----------|----------|----------|----------|----------|----------|----------|----------|----------|
| 1593 | NA       | NA       | 2.94E+07 | 4.58E+07 | NA       | NA       | NA       | NA       | NA       | NA       |
| 1594 | 0.00E+00 | 2.86E+06 | 3.87E+07 | 3.58E+07 | 6.31E+05 | 0.00E+00 | 0.00E+00 | 0.00E+00 | 7.99E-02 | Inf      |
| 1595 | NA       | NA       | 4.28E+07 | 3.10E+07 | 5.20E+05 | 8.83E+05 | NA       | NA       | NA       | NA       |
| 1596 | NA       | NA       | 3.21E+07 | 4.28E+07 | 0.00E+00 | 9.83E+04 | NA       | NA       | NA       | NA       |
| 1597 | 2.46E+06 | 0.00E+00 | 5.64E+07 | 1.74E+07 | 6.37E+05 | 5.02E+05 | 4.36E-02 | 3.85E+00 | 0.00E+00 | 0.00E+00 |
| 1598 | NA       | NA       | 4.90E+07 | 2.47E+07 | 4.64E+05 | 6.90E+05 | NA       | NA       | NA       | NA       |
| 1599 | 1.78E+06 | 0.00E+00 | 2.77E+07 | 4.45E+07 | 8.68E+05 | 1.55E+06 | 6.43E-02 | 2.05E+00 | 0.00E+00 | 0.00E+00 |
| 1600 | NA       | NA       | 7.00E+07 | 4.14E+06 | NA       | NA       | NA       | NA       | NA       | NA       |
| 1601 | NA       | NA       | 4.91E+07 | 2.49E+07 | NA       | NA       | NA       | NA       | NA       | NA       |
| 1602 | 6.92E+06 | 1.69E+07 | 3.51E+07 | 3.73E+07 | 9.81E+05 | 5.05E+05 | 1.97E-01 | 7.06E+00 | 4.54E-01 | 3.36E+01 |
| 1603 | NA       | NA       | 4.57E+07 | 2.75E+07 | 5.63E+05 | 0.00E+00 | NA       | NA       | NA       | NA       |
| 1604 | NA       | NA       | 2.86E+07 | 4.47E+07 | 0.00E+00 | 1.13E+05 | NA       | NA       | NA       | NA       |
| 1605 | NA       | NA       | 1.89E+07 | 5.44E+07 | 1.08E+05 | 0.00E+00 | NA       | NA       | NA       | NA       |
| 1606 | NA       | NA       | 4.22E+07 | 3.08E+07 | NA       | NA       | NA       | NA       | NA       | NA       |
| 1607 | NA       | NA       | 5.70E+07 | 1.59E+07 | 0.00E+00 | 5.31E+04 | NA       | NA       | NA       | NA       |
| 1608 | NA       | NA       | 6.47E+07 | 7.68E+06 | NA       | NA       | NA       | NA       | NA       | NA       |
| 1609 | NA       | NA       | 2.81E+07 | 4.33E+07 | NA       | NA       | NA       | NA       | NA       | NA       |
| 1610 | NA       | NA       | 3.52E+07 | 1.99E+07 | 6.13E+06 | 1.00E+07 | NA       | NA       | NA       | NA       |
| 1611 | NA       | NA       | 3.44E+07 | 3.67E+07 | 0.00E+00 | 0.00E+00 | NA       | NA       | NA       | NA       |
| 1612 | NA       | NA       | 5.57E+07 | 1.39E+07 | 3.53E+05 | 1.01E+06 | NA       | NA       | NA       | NA       |
| 1613 | NA       | NA       | 5.95E+07 | 1.01E+07 | 0.00E+00 | 2.13E+05 | NA       | NA       | NA       | NA       |
| 1614 | NA       | NA       | 4.72E+07 | 2.21E+07 | NA       | NA       | NA       | NA       | NA       | NA       |
| 1615 | NA       | NA       | 4.18E+07 | 2.67E+07 | 6.05E+05 | 0.00E+00 | NA       | NA       | NA       | NA       |
| 1616 | NA       | NA       | 3.89E+07 | 2.98E+07 | 0.00E+00 | 2.32E+05 | NA       | NA       | NA       | NA       |
| 1617 | NA       | NA       | 2.73E+07 | 1.95E+07 | 1.14E+07 | 1.08E+07 | NA       | NA       | NA       | NA       |
| 1618 | NA       | NA       | 2.78E+07 | 4.08E+07 | 1.47E+05 | 7.28E+04 | NA       | NA       | NA       | NA       |
| 1619 | NA       | NA       | 3.29E+07 | 3.59E+07 | 0.00E+00 | 0.00E+00 | NA       | NA       | NA       | NA       |
| 1620 | NA       | NA       | 3.09E+07 | 3.72E+07 | 1.32E+05 | 5.22E+05 | NA       | NA       | NA       | NA       |
| 1621 | NA       | NA       | 1.61E+07 | 5.21E+07 | 2.61E+05 | 1.48E+05 | NA       | NA       | NA       | NA       |
| 1622 | 6.64E+06 | 6.10E+06 | 5.20E+07 | 1.49E+07 | 9.26E+05 | 7.19E+05 | 1.28E-01 | 7.17E+00 | 4.10E-01 | 8.49E+00 |
| 1623 | NA       | NA       | 3.43E+07 | 3.33E+07 | 0.00E+00 | 9.67E+05 | NA       | NA       | NA       | NA       |
| 1624 | 0.00E+00 | 1.29E+06 | 2.98E+07 | 3.86E+07 | NA       | NA       | 0.00E+00 | NA       | 3.35E-02 | NA       |
| 1625 | NA       | NA       | 3.22E+07 | 3.60E+07 | NA       | NA       | NA       | NA       | NA       | NA       |
| 1626 | NA       | NA       | 3.15E+07 | 3.67E+07 | NA       | NA       | NA       | NA       | NA       | NA       |
| 1627 | NA       | NA       | 4.93E+07 | 1.85E+07 | NA       | NA       | NA       | NA       | NA       | NA       |
| 1628 | NA       | NA       | 3.31E+07 | 3.47E+07 | NA       | NA       | NA       | NA       | NA       | NA       |
| 1629 | 6.48E+05 | 0.00E+00 | 3.84E+07 | 2.68E+07 | 1.39E+06 | 1.22E+06 | 1.69E-02 | 4.66E-01 | 0.00E+00 | 0.00E+00 |
| 1630 | NA       | NA       | 3.34E+07 | 3.44E+07 | NA       | NA       | NA       | NA       | NA       | NA       |

|      |          |          |          |          |          |          |          |          |          |          |
|------|----------|----------|----------|----------|----------|----------|----------|----------|----------|----------|
| 1631 | NA       | NA       | 4.59E+07 | 2.08E+07 | 6.39E+05 | 4.28E+05 | NA       | NA       | NA       | NA       |
| 1632 | NA       | NA       | 4.96E+07 | 1.71E+07 | 6.39E+05 | 0.00E+00 | NA       | NA       | NA       | NA       |
| 1633 | 0.00E+00 | 0.00E+00 | 3.95E+07 | 2.73E+07 | 4.80E+05 | 0.00E+00 | 0.00E+00 | 0.00E+00 | 0.00E+00 | NA       |
| 1634 | NA       | NA       | 4.35E+07 | 2.32E+07 | NA       | NA       | NA       | NA       | NA       | NA       |
| 1635 | 0.00E+00 | 5.63E+06 | 2.63E+07 | 3.98E+07 | 3.24E+05 | 0.00E+00 | 0.00E+00 | 0.00E+00 | 1.41E-01 | Inf      |
| 1636 | NA       | NA       | 2.66E+07 | 3.97E+07 | 0.00E+00 | 0.00E+00 | NA       | NA       | NA       | NA       |
| 1637 | NA       | NA       | 5.43E+07 | 1.11E+07 | 0.00E+00 | 6.99E+05 | NA       | NA       | NA       | NA       |
| 1638 | NA       | NA       | 2.31E+07 | 4.27E+07 | NA       | NA       | NA       | NA       | NA       | NA       |
| 1639 | NA       | NA       | 3.33E+07 | 2.82E+07 | 8.63E+04 | 3.95E+06 | NA       | NA       | NA       | NA       |
| 1640 | NA       | NA       | 2.44E+07 | 4.11E+07 | NA       | NA       | NA       | NA       | NA       | NA       |
| 1641 | NA       | NA       | 4.92E+07 | 1.56E+07 | 2.89E+05 | 1.29E+05 | NA       | NA       | NA       | NA       |
| 1642 | NA       | NA       | 4.13E+07 | 2.33E+07 | 0.00E+00 | 3.34E+05 | NA       | NA       | NA       | NA       |
| 1643 | NA       | NA       | 3.88E+07 | 2.58E+07 | 4.25E+05 | 0.00E+00 | NA       | NA       | NA       | NA       |
| 1644 | 2.99E+06 | 6.61E+07 | 1.63E+07 | 4.78E+07 | 7.25E+05 | 0.00E+00 | 1.83E-01 | 4.12E+00 | 1.38E+00 | Inf      |
| 1645 | 2.55E+06 | 0.00E+00 | 4.15E+07 | 2.25E+07 | 6.50E+05 | 4.64E+04 | 6.15E-02 | 3.93E+00 | 0.00E+00 | 0.00E+00 |
| 1646 | 1.16E+05 | 2.68E+06 | 0.00E+00 | 1.58E+07 | 3.05E+05 | 4.87E+07 | Inf      | 3.80E-01 | 1.70E-01 | 5.52E-02 |
| 1647 | NA       | NA       | 4.94E+07 | 1.53E+07 | 0.00E+00 | 0.00E+00 | NA       | NA       | NA       | NA       |
| 1648 | NA       | NA       | 5.73E+07 | 7.28E+06 | NA       | NA       | NA       | NA       | NA       | NA       |
| 1649 | NA       | NA       | 2.52E+07 | 3.73E+07 | 1.27E+06 | 4.91E+05 | NA       | NA       | NA       | NA       |
| 1650 | NA       | NA       | 3.54E+07 | 2.88E+07 | NA       | NA       | NA       | NA       | NA       | NA       |
| 1651 | NA       | NA       | 4.18E+07 | 2.20E+07 | 1.92E+05 | 1.44E+05 | NA       | NA       | NA       | NA       |
| 1652 | NA       | NA       | 4.22E+07 | 2.02E+07 | 7.66E+05 | 5.45E+05 | NA       | NA       | NA       | NA       |
| 1653 | 1.85E+06 | 0.00E+00 | 3.38E+07 | 2.97E+07 | NA       | NA       | 5.48E-02 | NA       | 0.00E+00 | NA       |
| 1654 | NA       | NA       | 3.10E+07 | 3.19E+07 | 1.97E+05 | 0.00E+00 | NA       | NA       | NA       | NA       |
| 1655 | NA       | NA       | 2.70E+07 | 3.55E+07 | NA       | NA       | NA       | NA       | NA       | NA       |
| 1656 | 2.47E+07 | 0.00E+00 | 2.21E+07 | 3.75E+07 | 1.03E+06 | 1.66E+06 | 1.12E+00 | 2.39E+01 | 0.00E+00 | 0.00E+00 |
| 1657 | NA       | NA       | 4.36E+07 | 1.85E+07 | NA       | NA       | NA       | NA       | NA       | NA       |
| 1658 | NA       | NA       | 1.15E+07 | 5.04E+07 | 8.26E+04 | 0.00E+00 | NA       | NA       | NA       | NA       |
| 1659 | NA       | NA       | 3.35E+07 | 2.70E+07 | 6.77E+05 | 5.03E+05 | NA       | NA       | NA       | NA       |
| 1660 | 0.00E+00 | 6.58E+05 | 3.13E+07 | 2.97E+07 | 4.83E+05 | 1.46E+05 | 0.00E+00 | 0.00E+00 | 2.22E-02 | 4.51E+00 |
| 1661 | NA       | NA       | 2.22E+07 | 3.87E+07 | 0.00E+00 | 2.84E+05 | NA       | NA       | NA       | NA       |
| 1662 | NA       | NA       | 4.14E+07 | 1.89E+07 | 7.69E+05 | 0.00E+00 | NA       | NA       | NA       | NA       |
| 1663 | NA       | NA       | 3.29E+07 | 2.78E+07 | 0.00E+00 | 3.69E+04 | NA       | NA       | NA       | NA       |
| 1664 | 8.75E+06 | 0.00E+00 | 4.11E+07 | 1.81E+07 | 6.86E+05 | 8.48E+05 | 2.13E-01 | 1.28E+01 | 0.00E+00 | 0.00E+00 |
| 1665 | NA       | NA       | 2.08E+07 | 3.93E+07 | 4.14E+05 | 0.00E+00 | NA       | NA       | NA       | NA       |
| 1666 | NA       | NA       | 5.52E+07 | 5.25E+06 | NA       | NA       | NA       | NA       | NA       | NA       |
| 1667 | 6.44E+06 | 0.00E+00 | 2.03E+07 | 3.85E+07 | 1.25E+05 | 1.26E+06 | 3.18E-01 | 5.13E+01 | 0.00E+00 | 0.00E+00 |
| 1668 | NA       | NA       | 2.82E+07 | 3.12E+07 | 6.61E+04 | 3.30E+05 | NA       | NA       | NA       | NA       |

|      |          |          |          |          |          |          |          |          |          |          |
|------|----------|----------|----------|----------|----------|----------|----------|----------|----------|----------|
| 1669 | NA       | NA       | 2.01E+07 | 3.93E+07 | NA       | NA       | NA       | NA       | NA       | NA       |
| 1670 | NA       | NA       | 5.05E+07 | 8.88E+06 | NA       | NA       | NA       | NA       | NA       | NA       |
| 1671 | 2.99E+06 | 0.00E+00 | 4.64E+07 | 1.26E+07 | 3.01E+05 | 0.00E+00 | 6.45E-02 | 9.93E+00 | 0.00E+00 | NA       |
| 1672 | NA       | NA       | 3.21E+07 | 2.60E+07 | 8.28E+05 | 1.75E+05 | NA       | NA       | NA       | NA       |
| 1673 | 4.46E+06 | 0.00E+00 | 2.73E+07 | 3.06E+07 | 4.46E+05 | 6.92E+05 | 1.63E-01 | 1.00E+01 | 0.00E+00 | 0.00E+00 |
| 1674 | NA       | NA       | 4.31E+07 | 1.59E+07 | NA       | NA       | NA       | NA       | NA       | NA       |
| 1675 | NA       | NA       | 3.37E+07 | 2.49E+07 | 0.00E+00 | 1.99E+05 | NA       | NA       | NA       | NA       |
| 1676 | NA       | NA       | 2.30E+07 | 3.55E+07 | 0.00E+00 | 0.00E+00 | NA       | NA       | NA       | NA       |
| 1677 | NA       | NA       | 2.98E+07 | 2.81E+07 | 2.43E+05 | 1.83E+05 | NA       | NA       | NA       | NA       |
| 1678 | NA       | NA       | 4.29E+07 | 1.52E+07 | NA       | NA       | NA       | NA       | NA       | NA       |
| 1679 | NA       | NA       | 3.01E+07 | 2.69E+07 | 1.07E+06 | 0.00E+00 | NA       | NA       | NA       | NA       |
| 1680 | NA       | NA       | 3.90E+07 | 1.77E+07 | NA       | NA       | NA       | NA       | NA       | NA       |
| 1681 | NA       | NA       | 4.82E+07 | 8.44E+06 | 0.00E+00 | 0.00E+00 | NA       | NA       | NA       | NA       |
| 1682 | NA       | NA       | 2.24E+07 | 3.42E+07 | 0.00E+00 | 7.34E+04 | NA       | NA       | NA       | NA       |
| 1683 | NA       | NA       | 2.80E+07 | 2.81E+07 | 4.45E+05 | 0.00E+00 | NA       | NA       | NA       | NA       |
| 1684 | NA       | NA       | 2.98E+07 | 2.56E+07 | 4.16E+04 | 5.35E+05 | NA       | NA       | NA       | NA       |
| 1685 | NA       | NA       | 3.73E+07 | 1.78E+07 | 4.07E+05 | 2.59E+05 | NA       | NA       | NA       | NA       |
| 1686 | NA       | NA       | 3.37E+07 | 2.18E+07 | 0.00E+00 | 2.16E+05 | NA       | NA       | NA       | NA       |
| 1687 | NA       | NA       | 3.91E+07 | 1.65E+07 | 0.00E+00 | 0.00E+00 | NA       | NA       | NA       | NA       |
| 1688 | 0.00E+00 | 5.97E+07 | 3.70E+07 | 1.77E+07 | 0.00E+00 | 0.00E+00 | 0.00E+00 | NA       | 3.37E+00 | Inf      |
| 1689 | 2.00E+06 | 0.00E+00 | 4.52E+07 | 9.08E+06 | NA       | NA       | 4.43E-02 | NA       | 0.00E+00 | NA       |
| 1690 | NA       | NA       | 2.36E+07 | 2.99E+07 | 4.71E+05 | 0.00E+00 | NA       | NA       | NA       | NA       |
| 1691 | 7.26E+05 | 0.00E+00 | 3.75E+07 | 1.52E+07 | 5.77E+05 | 5.95E+05 | 1.93E-02 | 1.26E+00 | 0.00E+00 | 0.00E+00 |
| 1692 | NA       | NA       | 3.34E+07 | 2.00E+07 | 2.72E+05 | 8.45E+04 | NA       | NA       | NA       | NA       |
| 1693 | NA       | NA       | 3.05E+07 | 2.29E+07 | 0.00E+00 | 2.36E+05 | NA       | NA       | NA       | NA       |
| 1694 | 9.10E+06 | 5.90E+06 | 3.81E+07 | 1.42E+07 | 3.96E+05 | 7.70E+05 | 2.39E-01 | 2.30E+01 | 4.16E-01 | 7.67E+00 |
| 1695 | 1.21E+07 | 1.85E+08 | 1.06E+07 | 4.10E+07 | 4.63E+05 | 1.29E+06 | 1.14E+00 | 2.62E+01 | 4.50E+00 | 1.43E+02 |
| 1696 | 0.00E+00 | 2.82E+06 | 2.88E+07 | 2.44E+07 | 0.00E+00 | 1.42E+05 | 0.00E+00 | NA       | 1.15E-01 | 1.99E+01 |
| 1697 | NA       | NA       | 2.46E+07 | 2.85E+07 | 0.00E+00 | 0.00E+00 | NA       | NA       | NA       | NA       |
| 1698 | NA       | NA       | 3.47E+07 | 1.77E+07 | 0.00E+00 | 6.92E+05 | NA       | NA       | NA       | NA       |
| 1699 | NA       | NA       | 4.52E+07 | 5.26E+06 | 1.74E+06 | 9.45E+05 | NA       | NA       | NA       | NA       |
| 1700 | NA       | NA       | 2.25E+07 | 3.04E+07 | 5.53E+04 | 1.34E+05 | NA       | NA       | NA       | NA       |
| 1701 | NA       | NA       | 3.30E+07 | 1.91E+07 | 3.35E+05 | 0.00E+00 | NA       | NA       | NA       | NA       |
| 1702 | NA       | NA       | 4.21E+07 | 1.01E+07 | NA       | NA       | NA       | NA       | NA       | NA       |
| 1703 | NA       | NA       | 2.98E+07 | 2.24E+07 | NA       | NA       | NA       | NA       | NA       | NA       |
| 1704 | NA       | NA       | 4.06E+07 | 1.05E+07 | 2.62E+05 | 8.28E+05 | NA       | NA       | NA       | NA       |
| 1705 | 5.79E+06 | 0.00E+00 | 2.27E+07 | 2.80E+07 | 9.11E+05 | 2.90E+05 | 2.55E-01 | 6.36E+00 | 0.00E+00 | 0.00E+00 |
| 1706 | NA       | NA       | 1.87E+07 | 3.32E+07 | 0.00E+00 | 9.28E+04 | NA       | NA       | NA       | NA       |

|      |          |          |          |          |          |          |          |          |          |          |
|------|----------|----------|----------|----------|----------|----------|----------|----------|----------|----------|
| 1707 | NA       | NA       | 1.73E+07 | 3.37E+07 | 3.79E+05 | 1.68E+05 | NA       | NA       | NA       | NA       |
| 1708 | NA       | NA       | 0.00E+00 | 5.05E+07 | 8.48E+05 | 1.48E+05 | NA       | NA       | NA       | NA       |
| 1709 | NA       | NA       | 3.35E+07 | 1.75E+07 | 1.40E+05 | 0.00E+00 | NA       | NA       | NA       | NA       |
| 1710 | 1.59E+07 | 1.97E+07 | 1.39E+07 | 3.51E+07 | 1.66E+06 | 5.64E+05 | 1.14E+00 | 9.57E+00 | 5.61E-01 | 3.49E+01 |
| 1711 | 3.15E+05 | 4.14E+06 | 4.25E+07 | 8.42E+06 | 0.00E+00 | 0.00E+00 | 7.42E-03 | Inf      | 4.91E-01 | Inf      |
| 1712 | NA       | NA       | 3.60E+07 | 1.30E+07 | 1.16E+06 | 6.81E+05 | NA       | NA       | NA       | NA       |
| 1713 | 9.20E+06 | 0.00E+00 | 1.36E+07 | 3.56E+07 | 4.13E+05 | 4.84E+05 | 6.78E-01 | 2.23E+01 | 0.00E+00 | 0.00E+00 |
| 1714 | NA       | NA       | 2.45E+07 | 2.51E+07 | NA       | NA       | NA       | NA       | NA       | NA       |
| 1715 | 1.05E+06 | 0.00E+00 | 1.81E+07 | 3.14E+07 | 0.00E+00 | 0.00E+00 | 5.78E-02 | Inf      | 0.00E+00 | NA       |
| 1716 | NA       | NA       | 3.50E+07 | 1.34E+07 | 9.15E+05 | 0.00E+00 | NA       | NA       | NA       | NA       |
| 1717 | NA       | NA       | 3.46E+07 | 1.41E+07 | 0.00E+00 | 5.87E+05 | NA       | NA       | NA       | NA       |
| 1718 | NA       | NA       | 1.49E+07 | 3.41E+07 | 2.74E+05 | 0.00E+00 | NA       | NA       | NA       | NA       |
| 1719 | NA       | NA       | 4.01E+07 | 8.98E+06 | NA       | NA       | NA       | NA       | NA       | NA       |
| 1720 | NA       | NA       | 2.20E+07 | 2.69E+07 | NA       | NA       | NA       | NA       | NA       | NA       |
| 1721 | 1.63E+06 | 6.13E+05 | NA       | NA       | 1.85E+07 | 3.02E+07 | NA       | 8.84E-02 | NA       | 2.03E-02 |
| 1722 | NA       | NA       | 2.90E+07 | 1.81E+07 | 9.02E+05 | 3.90E+05 | NA       | NA       | NA       | NA       |
| 1723 | NA       | NA       | 1.82E+07 | 2.75E+07 | 1.44E+06 | 9.30E+05 | NA       | NA       | NA       | NA       |
| 1724 | NA       | NA       | 3.93E+07 | 8.26E+06 | 2.96E+05 | 0.00E+00 | NA       | NA       | NA       | NA       |
| 1725 | NA       | NA       | 1.59E+07 | 3.09E+07 | 8.08E+05 | 5.15E+04 | NA       | NA       | NA       | NA       |
| 1726 | 3.99E+06 | 0.00E+00 | 1.32E+07 | 3.45E+07 | NA       | NA       | 3.03E-01 | NA       | 0.00E+00 | NA       |
| 1727 | 0.00E+00 | 1.18E+05 | 2.37E+07 | 2.29E+07 | 7.67E+04 | 3.69E+05 | 0.00E+00 | 0.00E+00 | 5.14E-03 | 3.19E-01 |
| 1728 | 2.44E+07 | 0.00E+00 | NA       | NA       | 3.05E+07 | 1.65E+07 | NA       | 7.99E-01 | NA       | 0.00E+00 |
| 1729 | NA       | NA       | 3.53E+07 | 1.17E+07 | NA       | NA       | NA       | NA       | NA       | NA       |
| 1730 | NA       | NA       | 3.40E+07 | 1.26E+07 | 2.61E+05 | 0.00E+00 | NA       | NA       | NA       | NA       |
| 1731 | 0.00E+00 | 4.68E+07 | NA       | NA       | 0.00E+00 | 0.00E+00 | NA       | NA       | NA       | Inf      |
| 1732 | 0.00E+00 | 4.68E+07 | NA       | NA       | 0.00E+00 | 0.00E+00 | NA       | NA       | NA       | Inf      |
| 1733 | NA       | NA       | 1.88E+07 | 2.80E+07 | NA       | NA       | NA       | NA       | NA       | NA       |
| 1734 | 1.76E+06 | 0.00E+00 | 2.61E+07 | 2.02E+07 | 2.25E+05 | 1.01E+05 | 6.73E-02 | 7.82E+00 | 0.00E+00 | 0.00E+00 |
| 1735 | 1.89E+06 | 0.00E+00 | 2.54E+07 | 2.08E+07 | 2.55E+05 | 2.50E+05 | 7.44E-02 | 7.40E+00 | 0.00E+00 | 0.00E+00 |
| 1736 | 0.00E+00 | 1.30E+06 | 1.82E+07 | 2.84E+07 | 0.00E+00 | 0.00E+00 | 0.00E+00 | NA       | 4.56E-02 | Inf      |
| 1737 | NA       | NA       | 2.27E+07 | 2.36E+07 | NA       | NA       | NA       | NA       | NA       | NA       |
| 1738 | NA       | NA       | 1.18E+07 | 3.25E+07 | 1.16E+06 | 6.39E+05 | NA       | NA       | NA       | NA       |
| 1739 | NA       | NA       | 1.01E+07 | 4.04E+06 | 3.19E+07 | 0.00E+00 | NA       | NA       | NA       | NA       |
| 1740 | 2.42E+07 | 0.00E+00 | 9.92E+06 | 3.06E+07 | 3.09E+06 | 2.33E+06 | 2.43E+00 | 7.81E+00 | 0.00E+00 | 0.00E+00 |
| 1741 | NA       | NA       | 1.03E+07 | 3.51E+07 | 4.12E+05 | 0.00E+00 | NA       | NA       | NA       | NA       |
| 1742 | 5.25E+06 | 0.00E+00 | 2.73E+07 | 1.37E+07 | 3.85E+06 | 6.49E+05 | 1.93E-01 | 1.36E+00 | 0.00E+00 | 0.00E+00 |
| 1743 | 3.95E+06 | 0.00E+00 | 3.96E+07 | 5.60E+06 | NA       | NA       | 9.96E-02 | NA       | 0.00E+00 | NA       |
| 1744 | NA       | NA       | 1.64E+07 | 2.78E+07 | 9.63E+05 | 0.00E+00 | NA       | NA       | NA       | NA       |

|      |          |          |          |          |          |          |          |          |          |          |
|------|----------|----------|----------|----------|----------|----------|----------|----------|----------|----------|
| 1745 | NA       | NA       | 3.69E+07 | 8.24E+06 | NA       | NA       | NA       | NA       | NA       | NA       |
| 1746 | NA       | NA       | 2.59E+07 | 1.90E+07 | NA       | NA       | NA       | NA       | NA       | NA       |
| 1747 | NA       | NA       | 2.74E+07 | 1.73E+07 | NA       | NA       | NA       | NA       | NA       | NA       |
| 1748 | NA       | NA       | 3.11E+07 | 1.36E+07 | 0.00E+00 | 0.00E+00 | NA       | NA       | NA       | NA       |
| 1749 | NA       | NA       | 0.00E+00 | 4.36E+07 | 2.15E+05 | 8.74E+04 | NA       | NA       | NA       | NA       |
| 1750 | NA       | NA       | 3.96E+06 | 3.50E+07 | 4.85E+06 | 0.00E+00 | NA       | NA       | NA       | NA       |
| 1751 | NA       | NA       | 2.25E+07 | 2.10E+07 | 0.00E+00 | 3.31E+05 | NA       | NA       | NA       | NA       |
| 1752 | NA       | NA       | 2.59E+07 | 1.74E+07 | 0.00E+00 | 3.89E+05 | NA       | NA       | NA       | NA       |
| 1753 | NA       | NA       | 3.75E+07 | 5.96E+06 | 0.00E+00 | 1.17E+05 | NA       | NA       | NA       | NA       |
| 1754 | NA       | NA       | 8.02E+06 | 3.46E+07 | 8.73E+05 | 0.00E+00 | NA       | NA       | NA       | NA       |
| 1755 | NA       | NA       | 3.12E+07 | 1.22E+07 | NA       | NA       | NA       | NA       | NA       | NA       |
| 1756 | NA       | NA       | 1.83E+07 | 2.44E+07 | 6.93E+05 | 5.18E+04 | NA       | NA       | NA       | NA       |
| 1757 | NA       | NA       | 2.22E+07 | 2.11E+07 | NA       | NA       | NA       | NA       | NA       | NA       |
| 1758 | NA       | NA       | 3.34E+07 | 9.82E+06 | NA       | NA       | NA       | NA       | NA       | NA       |
| 1759 | NA       | NA       | 2.83E+07 | 1.49E+07 | 0.00E+00 | 0.00E+00 | NA       | NA       | NA       | NA       |
| 1760 | 1.18E+07 | 5.29E+06 | 2.32E+07 | 1.86E+07 | 7.06E+04 | 1.09E+06 | 5.07E-01 | 1.67E+02 | 2.85E-01 | 4.84E+00 |
| 1761 | NA       | NA       | 3.02E+07 | 1.24E+07 | 0.00E+00 | 0.00E+00 | NA       | NA       | NA       | NA       |
| 1762 | NA       | NA       | 2.05E+07 | 2.19E+07 | NA       | NA       | NA       | NA       | NA       | NA       |
| 1763 | NA       | NA       | 2.78E+07 | 1.39E+07 | 3.97E+05 | 0.00E+00 | NA       | NA       | NA       | NA       |
| 1764 | NA       | NA       | 2.02E+07 | 2.17E+07 | NA       | NA       | NA       | NA       | NA       | NA       |
| 1765 | 1.38E+07 | 1.10E+07 | 3.29E+07 | 8.52E+06 | 4.20E+05 | 0.00E+00 | 4.21E-01 | 3.30E+01 | 1.29E+00 | Inf      |
| 1766 | NA       | NA       | 1.94E+07 | 2.18E+07 | 3.42E+05 | 5.62E+04 | NA       | NA       | NA       | NA       |
| 1767 | NA       | NA       | 1.47E+07 | 2.66E+07 | NA       | NA       | NA       | NA       | NA       | NA       |
| 1768 | NA       | NA       | 2.06E+07 | 2.07E+07 | NA       | NA       | NA       | NA       | NA       | NA       |
| 1769 | NA       | NA       | 2.84E+07 | 1.29E+07 | 0.00E+00 | 0.00E+00 | NA       | NA       | NA       | NA       |
| 1770 | NA       | NA       | 1.87E+07 | 2.16E+07 | 9.77E+05 | 0.00E+00 | NA       | NA       | NA       | NA       |
| 1771 | NA       | NA       | 3.15E+07 | 9.64E+06 | NA       | NA       | NA       | NA       | NA       | NA       |
| 1772 | 0.00E+00 | 2.23E+06 | 8.16E+06 | 3.21E+07 | 4.76E+05 | 2.66E+05 | 0.00E+00 | 0.00E+00 | 6.94E-02 | 8.40E+00 |
| 1773 | 4.34E+06 | 3.55E+05 | 1.46E+07 | 2.54E+07 | 3.86E+05 | 3.06E+05 | 2.98E-01 | 1.13E+01 | 1.39E-02 | 1.16E+00 |
| 1774 | NA       | NA       | 2.71E+07 | 1.36E+07 | NA       | NA       | NA       | NA       | NA       | NA       |
| 1775 | NA       | NA       | 2.30E+07 | 1.77E+07 | NA       | NA       | NA       | NA       | NA       | NA       |
| 1776 | NA       | NA       | 8.90E+06 | 3.17E+07 | NA       | NA       | NA       | NA       | NA       | NA       |
| 1777 | NA       | NA       | 3.28E+07 | 7.48E+06 | 2.01E+05 | 0.00E+00 | NA       | NA       | NA       | NA       |
| 1778 | NA       | NA       | 3.07E+07 | 9.58E+06 | 0.00E+00 | 0.00E+00 | NA       | NA       | NA       | NA       |
| 1779 | NA       | NA       | 2.30E+07 | 1.67E+07 | 3.74E+05 | 0.00E+00 | NA       | NA       | NA       | NA       |
| 1780 | NA       | NA       | 1.91E+07 | 1.91E+07 | 6.94E+05 | 5.05E+05 | NA       | NA       | NA       | NA       |
| 1781 | NA       | NA       | NA       | NA       | 1.72E+07 | 2.18E+07 | NA       | NA       | NA       | NA       |
| 1782 | NA       | NA       | 3.11E+07 | 7.60E+06 | 0.00E+00 | 0.00E+00 | NA       | NA       | NA       | NA       |

|      |          |          |          |          |          |          |          |          |          |          |
|------|----------|----------|----------|----------|----------|----------|----------|----------|----------|----------|
| 1783 | NA       | NA       | 2.70E+07 | 1.16E+07 | NA       | NA       | NA       | NA       | NA       | NA       |
| 1784 | NA       | NA       | 7.50E+06 | 3.01E+07 | 9.05E+05 | 6.40E+04 | NA       | NA       | NA       | NA       |
| 1785 | NA       | NA       | 1.91E+07 | 1.91E+07 | 0.00E+00 | 3.19E+05 | NA       | NA       | NA       | NA       |
| 1786 | 8.13E+06 | 2.42E+07 | 2.95E+07 | 8.38E+06 | 4.27E+05 | 2.66E+05 | 2.76E-01 | 1.90E+01 | 2.89E+00 | 9.08E+01 |
| 1787 | 5.12E+06 | 9.87E+06 | 3.33E+07 | 4.96E+06 | 0.00E+00 | 0.00E+00 | 1.54E-01 | Inf      | 1.99E+00 | Inf      |
| 1788 | 7.79E+07 | 3.03E+07 | 9.28E+06 | 2.72E+07 | 6.45E+04 | 1.58E+06 | 8.40E+00 | 1.21E+03 | 1.11E+00 | 1.92E+01 |
| 1789 | NA       | NA       | 2.10E+07 | 1.53E+07 | 4.11E+05 | 1.20E+06 | NA       | NA       | NA       | NA       |
| 1790 | NA       | NA       | 2.79E+07 | 9.86E+06 | NA       | NA       | NA       | NA       | NA       | NA       |
| 1791 | NA       | NA       | 1.63E+07 | 2.04E+07 | 2.25E+05 | 5.09E+05 | NA       | NA       | NA       | NA       |
| 1792 | NA       | NA       | 1.06E+07 | 2.68E+07 | NA       | NA       | NA       | NA       | NA       | NA       |
| 1793 | 0.00E+00 | 3.73E+07 | NA       | NA       | 0.00E+00 | 0.00E+00 | NA       | NA       | NA       | Inf      |
| 1794 | 0.00E+00 | 3.73E+07 | NA       | NA       | 0.00E+00 | 0.00E+00 | NA       | NA       | NA       | Inf      |
| 1795 | NA       | NA       | 1.41E+07 | 2.06E+07 | 0.00E+00 | 2.60E+06 | NA       | NA       | NA       | NA       |
| 1796 | NA       | NA       | 1.33E+07 | 2.38E+07 | NA       | NA       | NA       | NA       | NA       | NA       |
| 1797 | NA       | NA       | 1.98E+07 | 1.73E+07 | NA       | NA       | NA       | NA       | NA       | NA       |
| 1798 | NA       | NA       | 1.59E+07 | 2.01E+07 | 7.43E+05 | 2.85E+05 | NA       | NA       | NA       | NA       |
| 1799 | NA       | NA       | 8.48E+06 | 2.75E+07 | 7.14E+05 | 0.00E+00 | NA       | NA       | NA       | NA       |
| 1800 | NA       | NA       | 2.78E+07 | 8.60E+06 | NA       | NA       | NA       | NA       | NA       | NA       |
| 1801 | NA       | NA       | 1.04E+07 | 2.59E+07 | NA       | NA       | NA       | NA       | NA       | NA       |
| 1802 | NA       | NA       | 1.87E+07 | 1.74E+07 | 0.00E+00 | 1.75E+05 | NA       | NA       | NA       | NA       |
| 1803 | NA       | NA       | 1.17E+07 | 2.43E+07 | NA       | NA       | NA       | NA       | NA       | NA       |
| 1804 | NA       | NA       | 1.40E+07 | 2.19E+07 | 0.00E+00 | 5.41E+04 | NA       | NA       | NA       | NA       |
| 1805 | 6.97E+06 | 2.95E+05 | 2.74E+07 | 7.12E+06 | 6.75E+05 | 6.98E+05 | 2.54E-01 | 1.03E+01 | 4.14E-02 | 4.23E-01 |
| 1806 | NA       | NA       | 1.63E+07 | 1.94E+07 | 2.79E+04 | 0.00E+00 | NA       | NA       | NA       | NA       |
| 1807 | NA       | NA       | 1.88E+07 | 1.68E+07 | NA       | NA       | NA       | NA       | NA       | NA       |
| 1808 | 9.73E+05 | 7.51E+07 | 2.63E+07 | 9.14E+06 | 3.71E+04 | 0.00E+00 | 3.70E-02 | 2.62E+01 | 8.22E+00 | Inf      |
| 1809 | NA       | NA       | 1.43E+07 | 2.08E+07 | NA       | NA       | NA       | NA       | NA       | NA       |
| 1810 | NA       | NA       | 1.72E+07 | 1.73E+07 | 5.13E+05 | 0.00E+00 | NA       | NA       | NA       | NA       |
| 1811 | NA       | NA       | 2.40E+07 | 9.92E+06 | 9.16E+05 | 1.04E+05 | NA       | NA       | NA       | NA       |
| 1812 | NA       | NA       | 1.71E+07 | 1.77E+07 | NA       | NA       | NA       | NA       | NA       | NA       |
| 1813 | NA       | NA       | 3.46E+07 | 0.00E+00 | NA       | NA       | NA       | NA       | NA       | NA       |
| 1814 | NA       | NA       | 2.58E+07 | 8.54E+06 | 1.70E+05 | 0.00E+00 | NA       | NA       | NA       | NA       |
| 1815 | 0.00E+00 | 3.43E+07 | NA       |
| 1816 | NA       | NA       | 1.86E+07 | 1.56E+07 | NA       | NA       | NA       | NA       | NA       | NA       |
| 1817 | NA       | NA       | 2.44E+07 | 9.74E+06 | NA       | NA       | NA       | NA       | NA       | NA       |
| 1818 | NA       | NA       | 3.12E+07 | 2.66E+06 | 0.00E+00 | 0.00E+00 | NA       | NA       | NA       | NA       |
| 1819 | NA       | NA       | 2.28E+07 | 1.06E+07 | NA       | NA       | NA       | NA       | NA       | NA       |
| 1820 | NA       | NA       | 2.61E+07 | 6.88E+06 | 0.00E+00 | 2.45E+05 | NA       | NA       | NA       | NA       |



|      |          |          |          |          |          |          |          |     |          |          |
|------|----------|----------|----------|----------|----------|----------|----------|-----|----------|----------|
| 1821 | NA       | NA       | 2.43E+07 | 8.86E+06 | NA       | NA       | NA       | NA  | NA       | NA       |
| 1822 | NA       | NA       | 1.23E+07 | 2.08E+07 | NA       | NA       | NA       | NA  | NA       | NA       |
| 1823 | NA       | NA       | 1.17E+07 | 2.08E+07 | 4.19E+05 | 0.00E+00 | NA       | NA  | NA       | NA       |
| 1824 | NA       | NA       | 1.23E+07 | 2.01E+07 | 1.10E+05 | 1.26E+05 | NA       | NA  | NA       | NA       |
| 1825 | NA       | NA       | 1.30E+07 | 1.92E+07 | NA       | NA       | NA       | NA  | NA       | NA       |
| 1826 | NA       | NA       | 1.58E+07 | 1.57E+07 | 2.91E+05 | 2.77E+05 | NA       | NA  | NA       | NA       |
| 1827 | NA       | NA       | 2.62E+07 | 5.16E+06 | 0.00E+00 | 6.39E+05 | NA       | NA  | NA       | NA       |
| 1828 | NA       | NA       | 2.56E+07 | 5.84E+06 | 3.70E+05 | 0.00E+00 | NA       | NA  | NA       | NA       |
| 1829 | NA       | NA       | 1.50E+07 | 1.68E+07 | NA       | NA       | NA       | NA  | NA       | NA       |
| 1830 | NA       | NA       | 2.24E+07 | 7.80E+06 | 8.35E+05 | 7.67E+05 | NA       | NA  | NA       | NA       |
| 1831 | NA       | NA       | 2.35E+07 | 8.26E+06 | NA       | NA       | NA       | NA  | NA       | NA       |
| 1832 | NA       | NA       | 1.50E+07 | 1.66E+07 | NA       | NA       | NA       | NA  | NA       | NA       |
| 1833 | NA       | NA       | 1.95E+07 | 1.19E+07 | NA       | NA       | NA       | NA  | NA       | NA       |
| 1834 | NA       | NA       | 2.68E+07 | 4.20E+06 | 3.67E+05 | 9.52E+04 | NA       | NA  | NA       | NA       |
| 1835 | NA       | NA       | 9.40E+06 | 2.11E+07 | 6.30E+05 | 1.62E+05 | NA       | NA  | NA       | NA       |
| 1836 | NA       | NA       | 1.78E+07 | 1.33E+07 | NA       | NA       | NA       | NA  | NA       | NA       |
| 1837 | NA       | NA       | 1.76E+07 | 1.30E+07 | 0.00E+00 | 1.86E+05 | NA       | NA  | NA       | NA       |
| 1838 | NA       | NA       | 2.19E+07 | 8.88E+06 | NA       | NA       | NA       | NA  | NA       | NA       |
| 1839 | NA       | NA       | 1.07E+07 | 2.00E+07 | NA       | NA       | NA       | NA  | NA       | NA       |
| 1840 | NA       | NA       | 2.43E+07 | 5.52E+06 | 3.99E+05 | 4.65E+05 | NA       | NA  | NA       | NA       |
| 1841 | 0.00E+00 | 6.59E+05 | 2.42E+07 | 6.20E+06 | 0.00E+00 | 1.31E+05 | 0.00E+00 | NA  | 1.06E-01 | 5.02E+00 |
| 1842 | NA       | NA       | 2.07E+07 | 9.44E+06 | 4.16E+05 | 0.00E+00 | NA       | NA  | NA       | NA       |
| 1843 | 0.00E+00 | 3.05E+07 | NA       | NA       | NA       | NA       | NA       | NA  | NA       | NA       |
| 1844 | NA       | NA       | 2.14E+07 | 9.10E+06 | NA       | NA       | NA       | NA  | NA       | NA       |
| 1845 | NA       | NA       | 2.04E+07 | 9.90E+06 | 0.00E+00 | 0.00E+00 | NA       | NA  | NA       | NA       |
| 1846 | NA       | NA       | 2.98E+07 | 0.00E+00 | 1.47E+05 | 5.78E+04 | NA       | NA  | NA       | NA       |
| 1847 | NA       | NA       | 1.23E+07 | 1.76E+07 | NA       | NA       | NA       | NA  | NA       | NA       |
| 1848 | NA       | NA       | 2.96E+07 | 0.00E+00 | NA       | NA       | NA       | NA  | NA       | NA       |
| 1849 | 4.82E+06 | 0.00E+00 | 2.37E+07 | 5.66E+06 | 0.00E+00 | 2.21E+05 | 2.03E-01 | Inf | 0.00E+00 | 0.00E+00 |
| 1850 | NA       | NA       | 1.60E+07 | 1.31E+07 | 0.00E+00 | 0.00E+00 | NA       | NA  | NA       | NA       |
| 1851 | NA       | NA       | 1.23E+07 | 1.68E+07 | NA       | NA       | NA       | NA  | NA       | NA       |
| 1852 | NA       | NA       | 6.50E+06 | 2.25E+07 | 0.00E+00 | 0.00E+00 | NA       | NA  | NA       | NA       |
| 1853 | NA       | NA       | 1.75E+07 | 1.11E+07 | 1.25E+05 | 2.87E+05 | NA       | NA  | NA       | NA       |
| 1854 | NA       | NA       | 0.00E+00 | 2.88E+07 | 1.45E+05 | 0.00E+00 | NA       | NA  | NA       | NA       |
| 1855 | 0.00E+00 | 1.13E+06 | 1.82E+07 | 1.04E+07 | 0.00E+00 | 0.00E+00 | 0.00E+00 | NA  | 1.08E-01 | Inf      |
| 1856 | NA       | NA       | 2.27E+07 | 5.68E+06 | NA       | NA       | NA       | NA  | NA       | NA       |
| 1857 | 3.23E+06 | 0.00E+00 | 1.74E+07 | 1.09E+07 | 0.00E+00 | 7.97E+04 | 1.86E-01 | Inf | 0.00E+00 | 0.00E+00 |
| 1858 | NA       | NA       | 1.15E+07 | 1.48E+07 | 6.73E+05 | 1.25E+06 | NA       | NA  | NA       | NA       |

|      |          |          |          |          |          |          |          |          |          |          |
|------|----------|----------|----------|----------|----------|----------|----------|----------|----------|----------|
| 1859 | NA       | NA       | 1.76E+07 | 1.02E+07 | 1.24E+05 | 1.16E+05 | NA       | NA       | NA       | NA       |
| 1860 | NA       | NA       | 1.77E+07 | 1.03E+07 | NA       | NA       | NA       | NA       | NA       | NA       |
| 1861 | NA       | NA       | 8.18E+06 | 1.97E+07 | NA       | NA       | NA       | NA       | NA       | NA       |
| 1862 | NA       | NA       | 2.79E+07 | 0.00E+00 | NA       | NA       | NA       | NA       | NA       | NA       |
| 1863 | NA       | NA       | 0.00E+00 | 2.78E+07 | NA       | NA       | NA       | NA       | NA       | NA       |
| 1864 | NA       | NA       | 2.67E+07 | 0.00E+00 | 2.55E+05 | 6.29E+05 | NA       | NA       | NA       | NA       |
| 1865 | 0.00E+00 | 8.39E+06 | 2.30E+07 | 3.96E+06 | 5.58E+05 | 0.00E+00 | 0.00E+00 | 0.00E+00 | 2.12E+00 | Inf      |
| 1866 | NA       | NA       | 1.84E+07 | 8.36E+06 | 7.89E+05 | 0.00E+00 | NA       | NA       | NA       | NA       |
| 1867 | 4.61E+06 | 0.00E+00 | NA       | NA       | 1.26E+07 | 1.49E+07 | NA       | 3.64E-01 | NA       | 0.00E+00 |
| 1868 | NA       | NA       | 7.68E+06 | 1.96E+07 | 5.15E+04 | 1.51E+05 | NA       | NA       | NA       | NA       |
| 1869 | NA       | NA       | 1.70E+07 | 1.02E+07 | 0.00E+00 | 1.26E+05 | NA       | NA       | NA       | NA       |
| 1870 | NA       | NA       | 1.88E+07 | 8.28E+06 | 1.83E+05 | 0.00E+00 | NA       | NA       | NA       | NA       |
| 1871 | NA       | NA       | 1.70E+07 | 9.96E+06 | NA       | NA       | NA       | NA       | NA       | NA       |
| 1872 | 2.14E+06 | 0.00E+00 | 1.28E+07 | 1.30E+07 | 5.91E+05 | 4.27E+05 | 1.67E-01 | 3.63E+00 | 0.00E+00 | 0.00E+00 |
| 1873 | NA       | NA       | 1.81E+07 | 7.66E+06 | 6.01E+05 | 0.00E+00 | NA       | NA       | NA       | NA       |
| 1874 | 2.48E+06 | 0.00E+00 | 0.00E+00 | 2.62E+07 | 0.00E+00 | 1.97E+05 | Inf      | Inf      | 0.00E+00 | 0.00E+00 |
| 1875 | NA       | NA       | 7.32E+06 | 1.85E+07 | 1.39E+05 | 3.95E+05 | NA       | NA       | NA       | NA       |
| 1876 | NA       | NA       | 1.50E+07 | 1.13E+07 | NA       | NA       | NA       | NA       | NA       | NA       |
| 1877 | NA       | NA       | 1.14E+07 | 1.48E+07 | 0.00E+00 | 0.00E+00 | NA       | NA       | NA       | NA       |
| 1878 | NA       | NA       | 1.47E+07 | 1.15E+07 | NA       | NA       | NA       | NA       | NA       | NA       |
| 1879 | NA       | NA       | 1.07E+07 | 1.54E+07 | 7.80E+04 | 0.00E+00 | NA       | NA       | NA       | NA       |
| 1880 | NA       | NA       | 2.07E+07 | 5.30E+06 | NA       | NA       | NA       | NA       | NA       | NA       |
| 1881 | NA       | NA       | 2.59E+07 | 0.00E+00 | NA       | NA       | NA       | NA       | NA       | NA       |
| 1882 | NA       | NA       | 2.23E+07 | 3.30E+06 | 0.00E+00 | 2.97E+05 | NA       | NA       | NA       | NA       |
| 1883 | 0.00E+00 | 1.02E+06 | 1.50E+07 | 1.08E+07 | NA       | NA       | 0.00E+00 | NA       | 9.44E-02 | NA       |
| 1884 | NA       | NA       | 7.90E+06 | 1.63E+07 | 9.60E+05 | 4.90E+05 | NA       | NA       | NA       | NA       |
| 1885 | NA       | NA       | 1.15E+07 | 1.36E+07 | 3.15E+05 | 0.00E+00 | NA       | NA       | NA       | NA       |
| 1886 | NA       | NA       | 1.08E+07 | 1.46E+07 | NA       | NA       | NA       | NA       | NA       | NA       |
| 1887 | NA       | NA       | 1.48E+07 | 1.05E+07 | NA       | NA       | NA       | NA       | NA       | NA       |
| 1888 | NA       | NA       | 1.04E+07 | 1.46E+07 | NA       | NA       | NA       | NA       | NA       | NA       |
| 1889 | NA       | NA       | 1.22E+07 | 1.22E+07 | 1.72E+05 | 3.27E+05 | NA       | NA       | NA       | NA       |
| 1890 | 7.32E+06 | 0.00E+00 | 5.30E+06 | 1.84E+07 | 4.98E+05 | 6.53E+05 | 1.38E+00 | 1.47E+01 | 0.00E+00 | 0.00E+00 |
| 1891 | NA       | NA       | 1.87E+07 | 6.12E+06 | NA       | NA       | NA       | NA       | NA       | NA       |
| 1892 | NA       | NA       | 2.62E+06 | 2.20E+07 | NA       | NA       | NA       | NA       | NA       | NA       |
| 1893 | NA       | NA       | 1.34E+07 | 1.03E+07 | 5.51E+05 | 0.00E+00 | NA       | NA       | NA       | NA       |
| 1894 | NA       | NA       | 1.99E+07 | 4.42E+06 | 0.00E+00 | 0.00E+00 | NA       | NA       | NA       | NA       |
| 1895 | NA       | NA       | 1.36E+07 | 1.04E+07 | 1.40E+05 | 0.00E+00 | NA       | NA       | NA       | NA       |
| 1896 | NA       | NA       | 2.07E+07 | 3.32E+06 | NA       | NA       | NA       | NA       | NA       | NA       |

|      |          |          |          |          |          |          |          |          |          |          |
|------|----------|----------|----------|----------|----------|----------|----------|----------|----------|----------|
| 1897 | NA       | NA       | 1.77E+07 | 6.30E+06 | NA       | NA       | NA       | NA       | NA       | NA       |
| 1898 | 0.00E+00 | 5.62E+06 | NA       | NA       | 1.23E+07 | 1.17E+07 | NA       | 0.00E+00 | NA       | 4.81E-01 |
| 1899 | NA       | NA       | 1.78E+07 | 4.94E+06 | 1.00E+06 | 1.51E+05 | NA       | NA       | NA       | NA       |
| 1900 | NA       | NA       | 2.37E+07 | 0.00E+00 | NA       | NA       | NA       | NA       | NA       | NA       |
| 1901 | NA       | NA       | 1.67E+07 | 6.48E+06 | NA       | NA       | NA       | NA       | NA       | NA       |
| 1902 | NA       | NA       | 1.36E+07 | 9.32E+06 | NA       | NA       | NA       | NA       | NA       | NA       |
| 1903 | 1.74E+07 | 0.00E+00 | 1.25E+07 | 8.04E+06 | 3.95E+05 | 1.53E+06 | 1.39E+00 | 4.40E+01 | 0.00E+00 | 0.00E+00 |
| 1904 | 1.26E+07 | 0.00E+00 | 1.86E+07 | 3.26E+06 | 0.00E+00 | 5.72E+05 | 6.79E-01 | Inf      | 0.00E+00 | 0.00E+00 |
| 1905 | NA       | NA       | 1.28E+07 | 9.04E+06 | 4.59E+05 | 0.00E+00 | NA       | NA       | NA       | NA       |
| 1906 | NA       | NA       | 1.33E+07 | 8.86E+06 | NA       | NA       | NA       | NA       | NA       | NA       |
| 1907 | NA       | NA       | 1.25E+07 | 9.60E+06 | NA       | NA       | NA       | NA       | NA       | NA       |
| 1908 | 0.00E+00 | 2.20E+07 | NA       |
| 1909 | NA       | NA       | 2.07E+07 | 1.32E+06 | NA       | NA       | NA       | NA       | NA       | NA       |
| 1910 | NA       | NA       | 1.22E+07 | 9.82E+06 | NA       | NA       | NA       | NA       | NA       | NA       |
| 1911 | NA       | NA       | 1.36E+07 | 8.26E+06 | 0.00E+00 | 9.55E+04 | NA       | NA       | NA       | NA       |
| 1912 | NA       | NA       | 8.18E+06 | 1.34E+07 | 1.29E+05 | 1.53E+05 | NA       | NA       | NA       | NA       |
| 1913 | NA       | NA       | 7.38E+06 | 1.38E+07 | 4.73E+05 | 0.00E+00 | NA       | NA       | NA       | NA       |
| 1914 | 7.47E+05 | 3.37E+07 | 1.26E+07 | 8.34E+06 | 3.73E+05 | 1.90E+05 | 5.93E-02 | 2.00E+00 | 4.05E+00 | 1.77E+02 |
| 1915 | 2.29E+07 | 1.52E+08 | 2.05E+07 | 0.00E+00 | 0.00E+00 | 9.36E+05 | 1.12E+00 | Inf      | Inf      | 1.63E+02 |
| 1916 | 7.90E+05 | 0.00E+00 | 9.40E+06 | 1.05E+07 | 1.04E+06 | 3.53E+05 | 8.41E-02 | 7.60E-01 | 0.00E+00 | 0.00E+00 |
| 1917 | 0.00E+00 | 2.46E+06 | 1.05E+07 | 1.07E+07 | 0.00E+00 | 0.00E+00 | 0.00E+00 | NA       | 2.29E-01 | Inf      |
| 1918 | NA       | NA       | 2.10E+07 | 0.00E+00 | 0.00E+00 | 8.83E+04 | NA       | NA       | NA       | NA       |
| 1919 | NA       | NA       | 1.75E+07 | 3.10E+06 | NA       | NA       | NA       | NA       | NA       | NA       |
| 1920 | NA       | NA       | 1.89E+07 | 0.00E+00 | 6.44E+05 | 1.03E+06 | NA       | NA       | NA       | NA       |
| 1921 | 0.00E+00 | 1.12E+06 | 1.98E+07 | 0.00E+00 | 3.49E+05 | 2.06E+05 | 0.00E+00 | 0.00E+00 | Inf      | 5.43E+00 |
| 1922 | 0.00E+00 | 5.17E+05 | 4.66E+06 | 1.56E+07 | 0.00E+00 | 0.00E+00 | 0.00E+00 | NA       | 3.31E-02 | Inf      |
| 1923 | NA       | NA       | 2.02E+07 | 0.00E+00 | 0.00E+00 | 0.00E+00 | NA       | NA       | NA       | NA       |
| 1924 | 3.12E+06 | 2.80E+06 | 5.64E+06 | 1.43E+07 | 1.68E+05 | 0.00E+00 | 5.53E-01 | 1.86E+01 | 1.96E-01 | Inf      |
| 1925 | NA       | NA       | 1.07E+07 | 8.86E+06 | 0.00E+00 | 4.45E+05 | NA       | NA       | NA       | NA       |
| 1926 | 3.52E+06 | 0.00E+00 | 4.50E+06 | 1.20E+07 | 2.79E+06 | 5.96E+05 | 7.81E-01 | 1.26E+00 | 0.00E+00 | 0.00E+00 |
| 1927 | 0.00E+00 | 1.99E+07 | NA       | NA       | 0.00E+00 | 0.00E+00 | NA       | NA       | NA       | Inf      |
| 1928 | NA       | NA       | 1.49E+07 | 4.90E+06 | NA       | NA       | NA       | NA       | NA       | NA       |
| 1929 | NA       | NA       | 6.45E+06 | 1.05E+07 | 2.81E+06 | 0.00E+00 | NA       | NA       | NA       | NA       |
| 1930 | NA       | NA       | 1.69E+07 | 2.92E+06 | NA       | NA       | NA       | NA       | NA       | NA       |
| 1931 | NA       | NA       | 1.28E+07 | 6.80E+06 | 1.08E+05 | 0.00E+00 | NA       | NA       | NA       | NA       |
| 1932 | NA       | NA       | 0.00E+00 | 1.94E+07 | 1.35E+05 | 0.00E+00 | NA       | NA       | NA       | NA       |
| 1933 | 0.00E+00 | 1.94E+07 | NA       | NA       | 0.00E+00 | 0.00E+00 | NA       | NA       | NA       | Inf      |
| 1934 | NA       | NA       | 5.80E+06 | 1.28E+07 | 2.86E+05 | 3.96E+05 | NA       | NA       | NA       | NA       |

|      |          |          |          |          |          |          |          |          |          |          |
|------|----------|----------|----------|----------|----------|----------|----------|----------|----------|----------|
| 1935 | NA       | NA       | 8.70E+06 | 1.02E+07 | 3.84E+05 | 0.00E+00 | NA       | NA       | NA       | NA       |
| 1936 | NA       | NA       | 1.03E+07 | 8.02E+06 | 8.30E+05 | 0.00E+00 | NA       | NA       | NA       | NA       |
| 1937 | 1.83E+07 | 2.93E+07 | 1.45E+07 | 1.90E+06 | 4.28E+04 | 2.54E+06 | 1.26E+00 | 4.28E+02 | 1.54E+01 | 1.15E+01 |
| 1938 | NA       | NA       | 9.02E+06 | 9.11E+06 | 1.79E+05 | 1.81E+05 | NA       | NA       | NA       | NA       |
| 1939 | NA       | NA       | 1.38E+07 | 4.72E+06 | NA       | NA       | NA       | NA       | NA       | NA       |
| 1940 | NA       | NA       | 1.18E+07 | 6.72E+06 | 0.00E+00 | 0.00E+00 | NA       | NA       | NA       | NA       |
| 1941 | NA       | NA       | 7.94E+06 | 1.04E+07 | 1.26E+05 | 0.00E+00 | NA       | NA       | NA       | NA       |
| 1942 | NA       | NA       | 4.80E+06 | 1.36E+07 | NA       | NA       | NA       | NA       | NA       | NA       |
| 1943 | NA       | NA       | 1.12E+07 | 7.08E+06 | NA       | NA       | NA       | NA       | NA       | NA       |
| 1944 | NA       | NA       | 1.83E+07 | 0.00E+00 | NA       | NA       | NA       | NA       | NA       | NA       |
| 1945 | NA       | NA       | 1.50E+07 | 3.14E+06 | 0.00E+00 | 0.00E+00 | NA       | NA       | NA       | NA       |
| 1946 | 0.00E+00 | 1.80E+07 | NA       |
| 1947 | NA       | NA       | 1.79E+07 | 0.00E+00 | NA       | NA       | NA       | NA       | NA       | NA       |
| 1948 | NA       | NA       | 1.04E+07 | 7.52E+06 | NA       | NA       | NA       | NA       | NA       | NA       |
| 1949 | NA       | NA       | 8.76E+06 | 8.94E+06 | 0.00E+00 | 1.82E+05 | NA       | NA       | NA       | NA       |
| 1950 | 0.00E+00 | 1.78E+07 | NA       |
| 1951 | NA       | NA       | 1.72E+07 | 0.00E+00 | 1.57E+05 | 2.75E+05 | NA       | NA       | NA       | NA       |
| 1952 | NA       | NA       | 1.73E+07 | 0.00E+00 | NA       | NA       | NA       | NA       | NA       | NA       |
| 1953 | NA       | NA       | 0.00E+00 | 1.72E+07 | NA       | NA       | NA       | NA       | NA       | NA       |
| 1954 | NA       | NA       | 6.64E+06 | 1.02E+07 | 3.71E+04 | 2.45E+05 | NA       | NA       | NA       | NA       |
| 1955 | NA       | NA       | 1.85E+06 | 1.50E+07 | 0.00E+00 | 8.30E+04 | NA       | NA       | NA       | NA       |
| 1956 | NA       | NA       | NA       | NA       | 0.00E+00 | 1.69E+07 | NA       | NA       | NA       | NA       |
| 1957 | 2.79E+05 | 0.00E+00 | 0.00E+00 | 1.58E+07 | 0.00E+00 | 8.71E+05 | Inf      | Inf      | 0.00E+00 | 0.00E+00 |
| 1958 | NA       | NA       | 1.66E+07 | 0.00E+00 | 0.00E+00 | 0.00E+00 | NA       | NA       | NA       | NA       |
| 1959 | 1.33E+07 | 4.28E+05 | 1.23E+07 | 3.54E+06 | 0.00E+00 | 5.36E+05 | 1.08E+00 | Inf      | 1.21E-01 | 8.00E-01 |
| 1960 | NA       | NA       | 1.60E+07 | 0.00E+00 | 0.00E+00 | 4.79E+04 | NA       | NA       | NA       | NA       |
| 1961 | NA       | NA       | 1.59E+07 | 0.00E+00 | NA       | NA       | NA       | NA       | NA       | NA       |
| 1962 | NA       | NA       | 1.32E+07 | 2.22E+06 | NA       | NA       | NA       | NA       | NA       | NA       |
| 1963 | NA       | NA       | 8.30E+06 | 6.72E+06 | NA       | NA       | NA       | NA       | NA       | NA       |
| 1964 | NA       | NA       | 8.58E+06 | 6.32E+06 | NA       | NA       | NA       | NA       | NA       | NA       |
| 1965 | NA       | NA       | 7.96E+06 | 6.92E+06 | NA       | NA       | NA       | NA       | NA       | NA       |
| 1966 | NA       | NA       | 1.24E+07 | 2.36E+06 | 0.00E+00 | 0.00E+00 | NA       | NA       | NA       | NA       |
| 1967 | 7.49E+05 | 4.27E+06 | 5.28E+06 | 8.46E+06 | 1.47E+05 | 6.04E+05 | 1.42E-01 | 5.10E+00 | 5.05E-01 | 7.07E+00 |
| 1968 | NA       | NA       | 9.33E+06 | 5.14E+06 | NA       | NA       | NA       | NA       | NA       | NA       |
| 1969 | NA       | NA       | 1.19E+07 | 2.58E+06 | NA       | NA       | NA       | NA       | NA       | NA       |
| 1970 | 6.14E+06 | 0.00E+00 | 4.80E+06 | 8.30E+06 | 1.44E+05 | 1.04E+06 | 1.28E+00 | 4.25E+01 | 0.00E+00 | 0.00E+00 |
| 1971 | 6.60E+05 | 0.00E+00 | 0.00E+00 | 1.41E+07 | 0.00E+00 | 1.00E+05 | Inf      | Inf      | 0.00E+00 | 0.00E+00 |
| 1972 | 0.00E+00 | 1.42E+07 | NA       | NA       | 0.00E+00 | 0.00E+00 | NA       | NA       | NA       | Inf      |

|      |          |          |          |          |          |          |          |          |          |          |
|------|----------|----------|----------|----------|----------|----------|----------|----------|----------|----------|
| 1973 | 1.84E+07 | 2.51E+05 | 9.80E+06 | 2.52E+06 | 3.35E+05 | 1.22E+06 | 1.88E+00 | 5.49E+01 | 9.95E-02 | 2.06E-01 |
| 1974 | NA       | NA       | NA       | NA       | 0.00E+00 | 1.36E+07 | NA       | NA       | NA       | NA       |
| 1975 | 1.03E+07 | 0.00E+00 | NA       | NA       | 5.48E+05 | 1.30E+07 | NA       | 1.88E+01 | NA       | 0.00E+00 |
| 1976 | NA       | NA       | 1.00E+07 | 3.44E+06 | NA       | NA       | NA       | NA       | NA       | NA       |
| 1977 | NA       | NA       | NA       | NA       | 6.97E+06 | 6.19E+06 | NA       | NA       | NA       | NA       |
| 1978 | 0.00E+00 | 1.28E+07 | NA       | NA       | 0.00E+00 | 0.00E+00 | NA       | NA       | NA       | Inf      |
| 1979 | NA       | NA       | 0.00E+00 | 1.26E+07 | 1.53E+05 | 0.00E+00 | NA       | NA       | NA       | NA       |
| 1980 | NA       | NA       | 4.78E+06 | 7.38E+06 | 4.73E+05 | 0.00E+00 | NA       | NA       | NA       | NA       |
| 1981 | NA       | NA       | 8.96E+06 | 3.26E+06 | 0.00E+00 | 3.63E+05 | NA       | NA       | NA       | NA       |
| 1982 | 0.00E+00 | 1.25E+07 | NA       | NA       | 0.00E+00 | 0.00E+00 | NA       | NA       | NA       | Inf      |
| 1983 | NA       | NA       | 9.91E+05 | 1.10E+07 | NA       | NA       | NA       | NA       | NA       | NA       |
| 1984 | 0.00E+00 | 1.20E+07 | NA       | NA       | 0.00E+00 | 0.00E+00 | NA       | NA       | NA       | Inf      |
| 1985 | NA       | NA       | 2.82E+06 | 8.84E+06 | NA       | NA       | NA       | NA       | NA       | NA       |
| 1986 | 8.45E+06 | 0.00E+00 | 5.80E+06 | 4.62E+06 | 6.62E+05 | 3.99E+05 | 1.46E+00 | 1.28E+01 | 0.00E+00 | 0.00E+00 |
| 1987 | 0.00E+00 | 2.38E+06 | 0.00E+00 | 1.03E+07 | 8.57E+05 | 2.97E+05 | NA       | 0.00E+00 | 2.31E-01 | 8.04E+00 |
| 1988 | NA       | NA       | 3.14E+06 | 8.28E+06 | NA       | NA       | NA       | NA       | NA       | NA       |
| 1989 | NA       | NA       | 1.14E+07 | 0.00E+00 | NA       | NA       | NA       | NA       | NA       | NA       |
| 1990 | 0.00E+00 | 4.01E+06 | 4.24E+06 | 6.94E+06 | NA       | NA       | 0.00E+00 | NA       | 5.78E-01 | NA       |
| 1991 | NA       | NA       | NA       | NA       | 7.97E+06 | 3.18E+06 | NA       | NA       | NA       | NA       |
| 1992 | NA       | NA       | 1.10E+07 | 0.00E+00 | NA       | NA       | NA       | NA       | NA       | NA       |
| 1993 | 0.00E+00 | 3.00E+06 | 3.42E+06 | 6.08E+06 | 6.80E+05 | 7.66E+05 | 0.00E+00 | 0.00E+00 | 4.94E-01 | 3.92E+00 |
| 1994 | 4.10E+07 | 3.17E+07 | NA       | NA       | 3.16E+05 | 1.06E+07 | NA       | 1.30E+02 | NA       | 3.00E+00 |
| 1995 | 0.00E+00 | 1.08E+07 | NA       | NA       | 0.00E+00 | 0.00E+00 | NA       | NA       | NA       | Inf      |
| 1996 | 0.00E+00 | 1.06E+07 | NA       | NA       | 0.00E+00 | 0.00E+00 | NA       | NA       | NA       | Inf      |
| 1997 | NA       | NA       | 1.05E+07 | 0.00E+00 | NA       | NA       | NA       | NA       | NA       | NA       |
| 1998 | 1.04E+07 | 0.00E+00 | NA       | NA       | 0.00E+00 | 0.00E+00 | NA       | Inf      | NA       | NA       |
| 1999 | NA       | NA       | 1.00E+07 | 0.00E+00 | 3.56E+05 | 0.00E+00 | NA       | NA       | NA       | NA       |
| 2000 | NA       | NA       | 7.12E+06 | 3.20E+06 | NA       | NA       | NA       | NA       | NA       | NA       |
| 2001 | NA       | NA       | 0.00E+00 | 1.03E+07 | NA       | NA       | NA       | NA       | NA       | NA       |
| 2002 | 1.02E+07 | 0.00E+00 | NA       |
| 2003 | 0.00E+00 | 1.02E+07 | NA       | NA       | 0.00E+00 | 0.00E+00 | NA       | NA       | NA       | Inf      |
| 2004 | NA       | NA       | 7.04E+06 | 2.76E+06 | 9.49E+04 | 6.42E+04 | NA       | NA       | NA       | NA       |
| 2005 | 0.00E+00 | 9.78E+06 | NA       |
| 2006 | NA       | NA       | 9.60E+06 | 0.00E+00 | NA       | NA       | NA       | NA       | NA       | NA       |
| 2007 | NA       | NA       | 9.16E+06 | 0.00E+00 | 2.75E+05 | 0.00E+00 | NA       | NA       | NA       | NA       |
| 2008 | NA       | NA       | 9.34E+06 | 0.00E+00 | 0.00E+00 | 0.00E+00 | NA       | NA       | NA       | NA       |
| 2009 | 0.00E+00 | 4.25E+06 | 4.48E+06 | 4.42E+06 | 3.76E+05 | 0.00E+00 | 0.00E+00 | 0.00E+00 | 9.60E-01 | Inf      |
| 2010 | NA       | NA       | 6.36E+06 | 2.70E+06 | NA       | NA       | NA       | NA       | NA       | NA       |

|      |          |          |          |          |          |          |          |          |          |          |
|------|----------|----------|----------|----------|----------|----------|----------|----------|----------|----------|
| 2011 | NA       | NA       | 9.02E+06 | 0.00E+00 | NA       | NA       | NA       | NA       | NA       | NA       |
| 2012 | NA       | NA       | 0.00E+00 | 8.86E+06 | 0.00E+00 | 1.18E+05 | NA       | NA       | NA       | NA       |
| 2013 | 0.00E+00 | 8.91E+06 | NA       | NA       | 0.00E+00 | 0.00E+00 | NA       | NA       | NA       | Inf      |
| 2014 | NA       | NA       | NA       | NA       | 6.56E+06 | 2.29E+06 | NA       | NA       | NA       | NA       |
| 2015 | NA       | NA       | NA       | NA       | 3.17E+06 | 5.60E+06 | NA       | NA       | NA       | NA       |
| 2016 | 0.00E+00 | 8.68E+06 | NA       | NA       | 0.00E+00 | 0.00E+00 | NA       | NA       | NA       | Inf      |
| 2017 | 0.00E+00 | 1.53E+06 | 0.00E+00 | 7.82E+06 | 4.31E+05 | 4.13E+05 | NA       | 0.00E+00 | 1.96E-01 | 3.71E+00 |
| 2018 | 0.00E+00 | 3.98E+07 | 3.90E+06 | 4.62E+06 | 0.00E+00 | 0.00E+00 | 0.00E+00 | NA       | 8.63E+00 | Inf      |
| 2019 | 0.00E+00 | 8.33E+06 | NA       | NA       | 0.00E+00 | 0.00E+00 | NA       | NA       | NA       | Inf      |
| 2020 | 0.00E+00 | 8.29E+06 | NA       | NA       | 0.00E+00 | 0.00E+00 | NA       | NA       | NA       | Inf      |
| 2021 | 0.00E+00 | 8.29E+06 | NA       | NA       | 0.00E+00 | 0.00E+00 | NA       | NA       | NA       | Inf      |
| 2022 | 8.28E+06 | 0.00E+00 | NA       |
| 2023 | 0.00E+00 | 4.43E+05 | 5.80E+06 | 2.26E+06 | NA       | NA       | 0.00E+00 | NA       | 1.96E-01 | NA       |
| 2024 | NA       | NA       | NA       | NA       | 4.39E+06 | 3.62E+06 | NA       | NA       | NA       | NA       |
| 2025 | 0.00E+00 | 7.99E+06 | NA       |
| 2026 | NA       | NA       | 7.92E+06 | 0.00E+00 | NA       | NA       | NA       | NA       | NA       | NA       |
| 2027 | NA       | NA       | 0.00E+00 | 7.10E+06 | 1.62E+05 | 1.45E+05 | NA       | NA       | NA       | NA       |
| 2028 | 2.05E+06 | 2.16E+06 | NA       | NA       | 3.82E+06 | 3.47E+06 | NA       | 5.38E-01 | NA       | 6.22E-01 |
| 2029 | NA       | NA       | 7.16E+06 | 0.00E+00 | NA       | NA       | NA       | NA       | NA       | NA       |
| 2030 | 0.00E+00 | 6.83E+06 | NA       | NA       | 0.00E+00 | 0.00E+00 | NA       | NA       | NA       | Inf      |
| 2031 | 2.62E+05 | 0.00E+00 | NA       | NA       | 4.32E+06 | 2.49E+06 | NA       | 6.06E-02 | NA       | 0.00E+00 |
| 2032 | NA       | NA       | 6.80E+06 | 0.00E+00 | 0.00E+00 | 0.00E+00 | NA       | NA       | NA       | NA       |
| 2033 | NA       | NA       | NA       | NA       | 9.80E+05 | 5.27E+06 | NA       | NA       | NA       | NA       |
| 2034 | NA       | NA       | NA       | NA       | 4.27E+06 | 1.85E+06 | NA       | NA       | NA       | NA       |
| 2035 | 0.00E+00 | 6.11E+06 | NA       |
| 2036 | 0.00E+00 | 6.08E+06 | NA       |
| 2037 | 0.00E+00 | 5.98E+06 | NA       |
| 2038 | NA       | NA       | NA       | NA       | 5.52E+06 | 4.55E+05 | NA       | NA       | NA       | NA       |
| 2039 | 7.82E+06 | 0.00E+00 | NA       | NA       | 4.98E+06 | 8.63E+05 | NA       | 1.57E+00 | NA       | 0.00E+00 |
| 2040 | 8.26E+05 | 0.00E+00 | NA       | NA       | 4.33E+06 | 1.50E+06 | NA       | 1.91E-01 | NA       | 0.00E+00 |
| 2041 | NA       | NA       | 0.00E+00 | 5.82E+06 | NA       | NA       | NA       | NA       | NA       | NA       |
| 2042 | NA       | NA       | NA       | NA       | 3.38E+06 | 2.21E+06 | NA       | NA       | NA       | NA       |
| 2043 | 0.00E+00 | 5.53E+06 | NA       | NA       | 0.00E+00 | 0.00E+00 | NA       | NA       | NA       | Inf      |
| 2044 | NA       | NA       | 0.00E+00 | 5.30E+06 | 0.00E+00 | 0.00E+00 | NA       | NA       | NA       | NA       |
| 2045 | 3.21E+05 | 0.00E+00 | NA       | NA       | 3.37E+05 | 4.96E+06 | NA       | 9.55E-01 | NA       | 0.00E+00 |
| 2046 | NA       | NA       | NA       | NA       | 0.00E+00 | 5.20E+06 | NA       | NA       | NA       | NA       |
| 2047 | 0.00E+00 | 5.18E+06 | NA       | NA       | 0.00E+00 | 0.00E+00 | NA       | NA       | NA       | Inf      |
| 2048 | 0.00E+00 | 5.18E+06 | NA       | NA       | 0.00E+00 | 0.00E+00 | NA       | NA       | NA       | Inf      |

|      |          |          |          |          |          |          |     |          |          |          |
|------|----------|----------|----------|----------|----------|----------|-----|----------|----------|----------|
| 2049 | 0.00E+00 | 5.17E+06 | NA       | NA       | 0.00E+00 | 0.00E+00 | NA  | NA       | NA       | Inf      |
| 2050 | 0.00E+00 | 5.10E+06 | NA       | NA       | 0.00E+00 | 0.00E+00 | NA  | NA       | NA       | Inf      |
| 2051 | 5.09E+06 | 0.00E+00 | NA       | NA       | NA       | NA       | NA  | NA       | NA       | NA       |
| 2052 | 1.33E+06 | 0.00E+00 | 0.00E+00 | 3.68E+06 | 1.01E+06 | 3.28E+05 | Inf | 1.32E+00 | 0.00E+00 | 0.00E+00 |
| 2053 | 0.00E+00 | 4.96E+06 | NA       | NA       | NA       | NA       | NA  | NA       | NA       | NA       |
| 2054 | NA       | NA       | 0.00E+00 | 4.92E+06 | NA       | NA       | NA  | NA       | NA       | NA       |
| 2055 | 0.00E+00 | 4.86E+06 | NA       | NA       | 0.00E+00 | 0.00E+00 | NA  | NA       | NA       | Inf      |
| 2056 | 0.00E+00 | 4.81E+06 | NA       | NA       | 0.00E+00 | 0.00E+00 | NA  | NA       | NA       | Inf      |
| 2057 | NA       | NA       | NA       | NA       | 1.22E+06 | 3.58E+06 | NA  | NA       | NA       | NA       |
| 2058 | 0.00E+00 | 4.77E+06 | NA       | NA       | 0.00E+00 | 0.00E+00 | NA  | NA       | NA       | Inf      |
| 2059 | 0.00E+00 | 4.77E+06 | NA       | NA       | 0.00E+00 | 0.00E+00 | NA  | NA       | NA       | Inf      |
| 2060 | 0.00E+00 | 4.77E+06 | NA       | NA       | 0.00E+00 | 0.00E+00 | NA  | NA       | NA       | Inf      |
| 2061 | 0.00E+00 | 4.73E+06 | NA       | NA       | NA       | NA       | NA  | NA       | NA       | NA       |
| 2062 | 0.00E+00 | 4.55E+06 | NA       | NA       | 0.00E+00 | 0.00E+00 | NA  | NA       | NA       | Inf      |
| 2063 | 4.52E+06 | 0.00E+00 | NA       | NA       | 0.00E+00 | 0.00E+00 | NA  | Inf      | NA       | NA       |
| 2064 | NA       | NA       | 4.46E+06 | 0.00E+00 | NA       | NA       | NA  | NA       | NA       | NA       |
| 2065 | NA       | NA       | NA       | NA       | 3.34E+06 | 1.10E+06 | NA  | NA       | NA       | NA       |
| 2066 | 4.34E+06 | 0.00E+00 | NA       | NA       | NA       | NA       | NA  | NA       | NA       | NA       |
| 2067 | 0.00E+00 | 4.21E+06 | NA       | NA       | 0.00E+00 | 0.00E+00 | NA  | NA       | NA       | Inf      |
| 2068 | 0.00E+00 | 6.14E+06 | NA       | NA       | 2.51E+06 | 1.52E+06 | NA  | 0.00E+00 | NA       | 4.04E+00 |
| 2069 | NA       | NA       | NA       | NA       | 3.90E+06 | 9.84E+04 | NA  | NA       | NA       | NA       |
| 2070 | 3.95E+06 | 0.00E+00 | NA       | NA       | NA       | NA       | NA  | NA       | NA       | NA       |
| 2071 | 3.87E+06 | 0.00E+00 | NA       | NA       | NA       | NA       | NA  | NA       | NA       | NA       |
| 2072 | NA       | NA       | NA       | NA       | 2.12E+06 | 1.70E+06 | NA  | NA       | NA       | NA       |
| 2073 | NA       | NA       | 0.00E+00 | 3.82E+06 | NA       | NA       | NA  | NA       | NA       | NA       |
| 2074 | 0.00E+00 | 3.82E+06 | NA       | NA       | NA       | NA       | NA  | NA       | NA       | NA       |
| 2075 | 0.00E+00 | 3.82E+06 | NA       | NA       | NA       | NA       | NA  | NA       | NA       | NA       |
| 2076 | 6.25E+07 | 0.00E+00 | NA       | NA       | 4.06E+05 | 3.40E+06 | NA  | 1.54E+02 | NA       | 0.00E+00 |
| 2077 | 0.00E+00 | 3.79E+06 | NA       | NA       | NA       | NA       | NA  | NA       | NA       | NA       |
| 2078 | 0.00E+00 | 3.76E+06 | NA       | NA       | NA       | NA       | NA  | NA       | NA       | NA       |
| 2079 | 0.00E+00 | 3.74E+06 | NA       | NA       | NA       | NA       | NA  | NA       | NA       | NA       |
| 2080 | 3.66E+06 | 0.00E+00 | NA       | NA       | NA       | NA       | NA  | NA       | NA       | NA       |
| 2081 | NA       | NA       | NA       | NA       | 1.51E+06 | 2.15E+06 | NA  | NA       | NA       | NA       |
| 2082 | NA       | NA       | NA       | NA       | 1.55E+06 | 2.02E+06 | NA  | NA       | NA       | NA       |
| 2083 | NA       | NA       | NA       | NA       | 2.73E+06 | 8.47E+05 | NA  | NA       | NA       | NA       |
| 2084 | 0.00E+00 | 3.43E+06 | NA       | NA       | 0.00E+00 | 0.00E+00 | NA  | NA       | NA       | Inf      |
| 2085 | 2.65E+08 | 7.35E+07 | NA       | NA       | 1.34E+06 | 2.06E+06 | NA  | 1.97E+02 | NA       | 3.56E+01 |
| 2086 | NA       | NA       | NA       | NA       | 1.38E+06 | 1.98E+06 | NA  | NA       | NA       | NA       |

|      |          |          |          |          |          |          |    |          |    |          |
|------|----------|----------|----------|----------|----------|----------|----|----------|----|----------|
| 2087 | 3.30E+06 | 0.00E+00 | NA       | NA       | NA       | NA       | NA | NA       | NA | NA       |
| 2088 | 0.00E+00 | 0.00E+00 | NA       | NA       | 1.71E+06 | 1.58E+06 | NA | 0.00E+00 | NA | 0.00E+00 |
| 2089 | 3.28E+06 | 0.00E+00 | NA       | NA       | NA       | NA       | NA | NA       | NA | NA       |
| 2090 | NA       | NA       | NA       | NA       | 1.63E+06 | 1.61E+06 | NA | NA       | NA | NA       |
| 2091 | NA       | NA       | NA       | NA       | 8.65E+05 | 2.21E+06 | NA | NA       | NA | NA       |
| 2092 | 2.82E+07 | 1.50E+06 | NA       | NA       | 5.25E+05 | 2.50E+06 | NA | 5.37E+01 | NA | 6.01E-01 |
| 2093 | NA       | NA       | NA       | NA       | 2.50E+06 | 4.89E+05 | NA | NA       | NA | NA       |
| 2094 | 1.15E+07 | 0.00E+00 | NA       | NA       | 1.44E+06 | 1.48E+06 | NA | 7.95E+00 | NA | 0.00E+00 |
| 2095 | 3.90E+07 | 0.00E+00 | NA       | NA       | 5.43E+05 | 2.37E+06 | NA | 7.19E+01 | NA | 0.00E+00 |
| 2096 | 0.00E+00 | 2.80E+06 | NA       | NA       | NA       | NA       | NA | NA       | NA | NA       |
| 2097 | NA       | NA       | NA       | NA       | 2.11E+06 | 6.51E+05 | NA | NA       | NA | NA       |
| 2098 | 0.00E+00 | 2.76E+06 | NA       | NA       | NA       | NA       | NA | NA       | NA | NA       |
| 2099 | NA       | NA       | 2.74E+06 | 0.00E+00 | NA       | NA       | NA | NA       | NA | NA       |
| 2100 | 3.30E+06 | 3.32E+06 | NA       | NA       | 1.96E+06 | 7.73E+05 | NA | 1.69E+00 | NA | 4.30E+00 |
| 2101 | 3.30E+06 | 3.32E+06 | NA       | NA       | 1.96E+06 | 7.73E+05 | NA | 1.69E+00 | NA | 4.30E+00 |
| 2102 | 6.16E+06 | 0.00E+00 | NA       | NA       | 1.88E+05 | 2.54E+06 | NA | 3.28E+01 | NA | 0.00E+00 |
| 2103 | 0.00E+00 | 2.66E+06 | NA       | NA       | 0.00E+00 | 0.00E+00 | NA | NA       | NA | Inf      |
| 2104 | 2.66E+06 | 0.00E+00 | NA       | NA       | NA       | NA       | NA | NA       | NA | NA       |
| 2105 | 2.63E+06 | 0.00E+00 | NA       | NA       | NA       | NA       | NA | NA       | NA | NA       |
| 2106 | 0.00E+00 | 2.60E+06 | NA       | NA       | NA       | NA       | NA | NA       | NA | NA       |
| 2107 | NA       | NA       | NA       | NA       | 2.21E+06 | 3.73E+05 | NA | NA       | NA | NA       |
| 2108 | 2.52E+06 | 0.00E+00 | NA       | NA       | NA       | NA       | NA | NA       | NA | NA       |
| 2109 | 0.00E+00 | 2.49E+06 | NA       | NA       | NA       | NA       | NA | NA       | NA | NA       |
| 2110 | 0.00E+00 | 2.44E+06 | NA       | NA       | NA       | NA       | NA | NA       | NA | NA       |
| 2111 | 0.00E+00 | 2.44E+06 | NA       | NA       | NA       | NA       | NA | NA       | NA | NA       |
| 2112 | 0.00E+00 | 2.42E+06 | NA       | NA       | 0.00E+00 | 0.00E+00 | NA | NA       | NA | Inf      |
| 2113 | 2.41E+06 | 0.00E+00 | NA       | NA       | NA       | NA       | NA | NA       | NA | NA       |
| 2114 | 5.63E+06 | 7.25E+07 | NA       | NA       | 0.00E+00 | 2.39E+06 | NA | Inf      | NA | 3.03E+01 |
| 2115 | 1.39E+07 | 0.00E+00 | NA       | NA       | 4.78E+05 | 1.88E+06 | NA | 2.90E+01 | NA | 0.00E+00 |
| 2116 | NA       | NA       | 0.00E+00 | 2.34E+06 | NA       | NA       | NA | NA       | NA | NA       |
| 2117 | NA       | NA       | NA       | NA       | 1.47E+06 | 8.25E+05 | NA | NA       | NA | NA       |
| 2118 | 0.00E+00 | 2.27E+06 | NA       | NA       | 0.00E+00 | 0.00E+00 | NA | NA       | NA | Inf      |
| 2119 | NA       | NA       | NA       | NA       | 2.12E+06 | 1.39E+05 | NA | NA       | NA | NA       |
| 2120 | 0.00E+00 | 2.24E+06 | NA       | NA       | 0.00E+00 | 0.00E+00 | NA | NA       | NA | Inf      |
| 2121 | 2.87E+07 | 2.98E+07 | NA       | NA       | 1.53E+05 | 2.02E+06 | NA | 1.88E+02 | NA | 1.47E+01 |
| 2122 | NA       | NA       | NA       | NA       | 1.02E+06 | 1.13E+06 | NA | NA       | NA | NA       |
| 2123 | 0.00E+00 | 2.11E+06 | NA       | NA       | NA       | NA       | NA | NA       | NA | NA       |
| 2124 | 0.00E+00 | 2.11E+06 | NA       | NA       | NA       | NA       | NA | NA       | NA | NA       |



|      |          |          |    |    |          |          |    |          |    |          |
|------|----------|----------|----|----|----------|----------|----|----------|----|----------|
| 2125 | 0.00E+00 | 2.10E+06 | NA | NA | 0.00E+00 | 0.00E+00 | NA | NA       | NA | Inf      |
| 2126 | NA       | NA       | NA | NA | 2.10E+06 | 0.00E+00 | NA | NA       | NA | NA       |
| 2127 | 0.00E+00 | 2.07E+06 | NA | NA | NA       | NA       | NA | NA       | NA | NA       |
| 2128 | 2.06E+06 | 0.00E+00 | NA | NA | NA       | NA       | NA | NA       | NA | NA       |
| 2129 | NA       | NA       | NA | NA | 1.60E+06 | 4.17E+05 | NA | NA       | NA | NA       |
| 2130 | NA       | NA       | NA | NA | 1.78E+06 | 2.32E+05 | NA | NA       | NA | NA       |
| 2131 | 2.00E+06 | 0.00E+00 | NA | NA | NA       | NA       | NA | NA       | NA | NA       |
| 2132 | 0.00E+00 | 1.96E+06 | NA | NA | 0.00E+00 | 0.00E+00 | NA | NA       | NA | Inf      |
| 2133 | 1.96E+06 | 0.00E+00 | NA | NA | NA       | NA       | NA | NA       | NA | NA       |
| 2134 | 1.96E+06 | 0.00E+00 | NA | NA | NA       | NA       | NA | NA       | NA | NA       |
| 2135 | 0.00E+00 | 1.95E+06 | NA | NA | NA       | NA       | NA | NA       | NA | NA       |
| 2136 | 1.95E+06 | 0.00E+00 | NA | NA | NA       | NA       | NA | NA       | NA | NA       |
| 2137 | 0.00E+00 | 1.95E+06 | NA | NA | NA       | NA       | NA | NA       | NA | NA       |
| 2138 | NA       | NA       | NA | NA | 2.89E+05 | 1.63E+06 | NA | NA       | NA | NA       |
| 2139 | NA       | NA       | NA | NA | 1.40E+06 | 4.99E+05 | NA | NA       | NA | NA       |
| 2140 | 1.86E+06 | 0.00E+00 | NA | NA | NA       | NA       | NA | NA       | NA | NA       |
| 2141 | NA       | NA       | NA | NA | 1.71E+06 | 1.36E+05 | NA | NA       | NA | NA       |
| 2142 | 0.00E+00 | 1.85E+06 | NA | NA | NA       | NA       | NA | NA       | NA | NA       |
| 2143 | 0.00E+00 | 1.82E+06 | NA | NA | NA       | NA       | NA | NA       | NA | NA       |
| 2144 | 1.81E+06 | 0.00E+00 | NA | NA | NA       | NA       | NA | NA       | NA | NA       |
| 2145 | 3.31E+06 | 0.00E+00 | NA | NA | 8.92E+05 | 9.16E+05 | NA | 3.71E+00 | NA | 0.00E+00 |
| 2146 | 0.00E+00 | 1.81E+06 | NA | NA | 0.00E+00 | 0.00E+00 | NA | NA       | NA | Inf      |
| 2147 | 1.69E+07 | 0.00E+00 | NA | NA | 0.00E+00 | 1.80E+06 | NA | Inf      | NA | 0.00E+00 |
| 2148 | NA       | NA       | NA | NA | 1.61E+06 | 1.92E+05 | NA | NA       | NA | NA       |
| 2149 | NA       | NA       | NA | NA | 1.80E+06 | 0.00E+00 | NA | NA       | NA | NA       |
| 2150 | 0.00E+00 | 1.79E+06 | NA | NA | 0.00E+00 | 0.00E+00 | NA | NA       | NA | Inf      |
| 2151 | 1.79E+06 | 0.00E+00 | NA | NA | NA       | NA       | NA | NA       | NA | NA       |
| 2152 | NA       | NA       | NA | NA | 6.23E+05 | 1.17E+06 | NA | NA       | NA | NA       |
| 2153 | NA       | NA       | NA | NA | 1.78E+06 | 0.00E+00 | NA | NA       | NA | NA       |
| 2154 | 1.75E+06 | 0.00E+00 | NA | NA | NA       | NA       | NA | NA       | NA | NA       |
| 2155 | 1.73E+06 | 0.00E+00 | NA | NA | NA       | NA       | NA | NA       | NA | NA       |
| 2156 | NA       | NA       | NA | NA | 8.61E+05 | 8.24E+05 | NA | NA       | NA | NA       |
| 2157 | 0.00E+00 | 1.65E+06 | NA | NA | NA       | NA       | NA | NA       | NA | NA       |
| 2158 | NA       | NA       | NA | NA | 1.25E+06 | 3.87E+05 | NA | NA       | NA | NA       |
| 2159 | 0.00E+00 | 1.64E+06 | NA | NA | NA       | NA       | NA | NA       | NA | NA       |
| 2160 | NA       | NA       | NA | NA | 6.26E+05 | 9.96E+05 | NA | NA       | NA | NA       |
| 2161 | 0.00E+00 | 1.62E+06 | NA | NA | NA       | NA       | NA | NA       | NA | NA       |
| 2162 | NA       | NA       | NA | NA | 6.05E+05 | 9.84E+05 | NA | NA       | NA | NA       |

|      |          |          |    |    |          |          |    |          |    |          |
|------|----------|----------|----|----|----------|----------|----|----------|----|----------|
| 2163 | 1.61E+07 | 5.31E+06 | NA | NA | 2.08E+05 | 1.38E+06 | NA | 7.73E+01 | NA | 3.85E+00 |
| 2164 | NA       | NA       | NA | NA | 1.58E+06 | 0.00E+00 | NA | NA       | NA | NA       |
| 2165 | 1.58E+06 | 0.00E+00 | NA | NA | 0.00E+00 | 0.00E+00 | NA | Inf      | NA | NA       |
| 2166 | NA       | NA       | NA | NA | 1.44E+06 | 1.12E+05 | NA | NA       | NA | NA       |
| 2167 | NA       | NA       | NA | NA | 1.22E+06 | 3.09E+05 | NA | NA       | NA | NA       |
| 2168 | NA       | NA       | NA | NA | 1.02E+06 | 4.86E+05 | NA | NA       | NA | NA       |
| 2169 | 1.06E+07 | 0.00E+00 | NA | NA | 0.00E+00 | 1.50E+06 | NA | Inf      | NA | 0.00E+00 |
| 2170 | NA       | NA       | NA | NA | 1.01E+06 | 4.87E+05 | NA | NA       | NA | NA       |
| 2171 | 1.49E+06 | 0.00E+00 | NA | NA | NA       | NA       | NA | NA       | NA | NA       |
| 2172 | 0.00E+00 | 1.47E+06 | NA | NA | NA       | NA       | NA | NA       | NA | NA       |
| 2173 | 0.00E+00 | 1.47E+06 | NA | NA | 0.00E+00 | 0.00E+00 | NA | NA       | NA | Inf      |
| 2174 | NA       | NA       | NA | NA | 1.37E+06 | 8.67E+04 | NA | NA       | NA | NA       |
| 2175 | 1.82E+07 | 0.00E+00 | NA | NA | 7.74E+05 | 6.81E+05 | NA | 2.36E+01 | NA | 0.00E+00 |
| 2176 | NA       | NA       | NA | NA | 1.45E+06 | 0.00E+00 | NA | NA       | NA | NA       |
| 2177 | 0.00E+00 | 1.44E+06 | NA | NA | 0.00E+00 | 0.00E+00 | NA | NA       | NA | Inf      |
| 2178 | NA       | NA       | NA | NA | 1.20E+06 | 2.32E+05 | NA | NA       | NA | NA       |
| 2179 | 2.08E+06 | 0.00E+00 | NA | NA | 2.32E+05 | 1.19E+06 | NA | 8.98E+00 | NA | 0.00E+00 |
| 2180 | 1.42E+06 | 0.00E+00 | NA | NA | NA       | NA       | NA | NA       | NA | NA       |
| 2181 | 0.00E+00 | 1.42E+06 | NA | NA | 0.00E+00 | 0.00E+00 | NA | NA       | NA | Inf      |
| 2182 | NA       | NA       | NA | NA | 1.25E+06 | 1.55E+05 | NA | NA       | NA | NA       |
| 2183 | 0.00E+00 | 1.40E+06 | NA | NA | NA       | NA       | NA | NA       | NA | NA       |
| 2184 | 0.00E+00 | 1.39E+06 | NA | NA | NA       | NA       | NA | NA       | NA | NA       |
| 2185 | 2.66E+06 | 0.00E+00 | NA | NA | 7.17E+05 | 6.35E+05 | NA | 3.72E+00 | NA | 0.00E+00 |
| 2186 | 9.81E+05 | 0.00E+00 | NA | NA | 1.33E+06 | 0.00E+00 | NA | 7.36E-01 | NA | NA       |
| 2187 | 4.48E+07 | 0.00E+00 | NA | NA | 0.00E+00 | 1.33E+06 | NA | Inf      | NA | 0.00E+00 |
| 2188 | NA       | NA       | NA | NA | 9.32E+05 | 3.99E+05 | NA | NA       | NA | NA       |
| 2189 | 1.33E+06 | 0.00E+00 | NA | NA | NA       | NA       | NA | NA       | NA | NA       |
| 2190 | 0.00E+00 | 1.32E+06 | NA | NA | NA       | NA       | NA | NA       | NA | NA       |
| 2191 | 1.80E+07 | 0.00E+00 | NA | NA | 0.00E+00 | 1.31E+06 | NA | Inf      | NA | 0.00E+00 |
| 2192 | 7.08E+06 | 0.00E+00 | NA | NA | 0.00E+00 | 1.30E+06 | NA | Inf      | NA | 0.00E+00 |
| 2193 | NA       | NA       | NA | NA | 8.69E+05 | 4.24E+05 | NA | NA       | NA | NA       |
| 2194 | NA       | NA       | NA | NA | 1.29E+06 | 0.00E+00 | NA | NA       | NA | NA       |
| 2195 | NA       | NA       | NA | NA | 9.41E+05 | 3.25E+05 | NA | NA       | NA | NA       |
| 2196 | NA       | NA       | NA | NA | 3.95E+05 | 8.69E+05 | NA | NA       | NA | NA       |
| 2197 | 1.26E+06 | 0.00E+00 | NA | NA | NA       | NA       | NA | NA       | NA | NA       |
| 2198 | 1.26E+06 | 0.00E+00 | NA | NA | NA       | NA       | NA | NA       | NA | NA       |
| 2199 | NA       | NA       | NA | NA | 4.86E+05 | 7.62E+05 | NA | NA       | NA | NA       |
| 2200 | NA       | NA       | NA | NA | 7.78E+05 | 4.64E+05 | NA | NA       | NA | NA       |

|      |          |          |    |    |          |          |    |          |    |          |
|------|----------|----------|----|----|----------|----------|----|----------|----|----------|
| 2201 | 1.12E+06 | 0.00E+00 | NA | NA | 1.67E+05 | 1.07E+06 | NA | 6.69E+00 | NA | 0.00E+00 |
| 2202 | NA       | NA       | NA | NA | 1.22E+06 | 0.00E+00 | NA | NA       | NA | NA       |
| 2203 | 1.21E+06 | 0.00E+00 | NA | NA | NA       | NA       | NA | NA       | NA | NA       |
| 2204 | 0.00E+00 | 1.21E+06 | NA | NA | 0.00E+00 | 0.00E+00 | NA | NA       | NA | Inf      |
| 2205 | 1.94E+07 | 8.07E+05 | NA | NA | 4.64E+05 | 7.37E+05 | NA | 4.19E+01 | NA | 1.10E+00 |
| 2206 | 1.20E+06 | 0.00E+00 | NA | NA | NA       | NA       | NA | NA       | NA | NA       |
| 2207 | NA       | NA       | NA | NA | 8.28E+05 | 3.69E+05 | NA | NA       | NA | NA       |
| 2208 | 0.00E+00 | 1.18E+06 | NA | NA | NA       | NA       | NA | NA       | NA | NA       |
| 2209 | 0.00E+00 | 1.18E+06 | NA | NA | NA       | NA       | NA | NA       | NA | NA       |
| 2210 | NA       | NA       | NA | NA | 3.61E+05 | 8.15E+05 | NA | NA       | NA | NA       |
| 2211 | NA       | NA       | NA | NA | 5.89E+05 | 5.87E+05 | NA | NA       | NA | NA       |
| 2212 | 5.89E+06 | 0.00E+00 | NA | NA | 3.97E+05 | 7.74E+05 | NA | 1.48E+01 | NA | 0.00E+00 |
| 2213 | 1.17E+06 | 0.00E+00 | NA | NA | NA       | NA       | NA | NA       | NA | NA       |
| 2214 | 1.16E+06 | 0.00E+00 | NA | NA | NA       | NA       | NA | NA       | NA | NA       |
| 2215 | 0.00E+00 | 1.16E+06 | NA | NA | NA       | NA       | NA | NA       | NA | NA       |
| 2216 | 0.00E+00 | 1.16E+06 | NA | NA | NA       | NA       | NA | NA       | NA | NA       |
| 2217 | NA       | NA       | NA | NA | 5.05E+05 | 6.42E+05 | NA | NA       | NA | NA       |
| 2218 | 0.00E+00 | 2.09E+06 | NA | NA | 6.85E+05 | 4.60E+05 | NA | 0.00E+00 | NA | 4.53E+00 |
| 2219 | 0.00E+00 | 1.14E+06 | NA | NA | NA       | NA       | NA | NA       | NA | NA       |
| 2220 | 1.12E+06 | 0.00E+00 | NA | NA | 0.00E+00 | 0.00E+00 | NA | Inf      | NA | NA       |
| 2221 | NA       | NA       | NA | NA | 8.10E+05 | 3.06E+05 | NA | NA       | NA | NA       |
| 2222 | 0.00E+00 | 1.11E+06 | NA | NA | 0.00E+00 | 0.00E+00 | NA | NA       | NA | Inf      |
| 2223 | 1.10E+06 | 0.00E+00 | NA | NA | NA       | NA       | NA | NA       | NA | NA       |
| 2224 | 0.00E+00 | 1.10E+06 | NA | NA | NA       | NA       | NA | NA       | NA | NA       |
| 2225 | NA       | NA       | NA | NA | 1.08E+06 | 0.00E+00 | NA | NA       | NA | NA       |
| 2226 | 1.08E+06 | 0.00E+00 | NA | NA | NA       | NA       | NA | NA       | NA | NA       |
| 2227 | NA       | NA       | NA | NA | 4.77E+05 | 6.02E+05 | NA | NA       | NA | NA       |
| 2228 | NA       | NA       | NA | NA | 1.01E+06 | 6.96E+04 | NA | NA       | NA | NA       |
| 2229 | 5.61E+05 | 0.00E+00 | NA | NA | 1.01E+06 | 5.12E+04 | NA | 5.53E-01 | NA | 0.00E+00 |
| 2230 | 1.06E+06 | 0.00E+00 | NA | NA | NA       | NA       | NA | NA       | NA | NA       |
| 2231 | 0.00E+00 | 1.96E+06 | NA | NA | 9.46E+05 | 9.27E+04 | NA | 0.00E+00 | NA | 2.12E+01 |
| 2232 | 1.04E+06 | 0.00E+00 | NA | NA | NA       | NA       | NA | NA       | NA | NA       |
| 2233 | 7.97E+06 | 0.00E+00 | NA | NA | 6.11E+05 | 4.25E+05 | NA | 1.30E+01 | NA | 0.00E+00 |
| 2234 | NA       | NA       | NA | NA | 6.47E+05 | 3.85E+05 | NA | NA       | NA | NA       |
| 2235 | 1.03E+07 | 4.13E+06 | NA | NA | 0.00E+00 | 1.03E+06 | NA | Inf      | NA | 4.03E+00 |
| 2236 | NA       | NA       | NA | NA | 3.88E+05 | 6.24E+05 | NA | NA       | NA | NA       |
| 2237 | 1.42E+07 | 0.00E+00 | NA | NA | 2.34E+05 | 7.75E+05 | NA | 6.08E+01 | NA | 0.00E+00 |
| 2238 | NA       | NA       | NA | NA | 6.32E+05 | 3.70E+05 | NA | NA       | NA | NA       |

|      |          |          |    |    |          |          |    |          |    |          |
|------|----------|----------|----|----|----------|----------|----|----------|----|----------|
| 2239 | NA       | NA       | NA | NA | 9.94E+05 | 0.00E+00 | NA | NA       | NA | NA       |
| 2240 | 9.92E+05 | 0.00E+00 | NA | NA | NA       | NA       | NA | NA       | NA | NA       |
| 2241 | 9.10E+06 | 0.00E+00 | NA | NA | 9.60E+04 | 8.95E+05 | NA | 9.48E+01 | NA | 0.00E+00 |
| 2242 | 2.31E+06 | 0.00E+00 | NA | NA | 0.00E+00 | 9.88E+05 | NA | Inf      | NA | 0.00E+00 |
| 2243 | 5.46E+06 | 0.00E+00 | NA | NA | 5.91E+04 | 9.26E+05 | NA | 9.23E+01 | NA | 0.00E+00 |
| 2244 | 5.91E+06 | 0.00E+00 | NA | NA | 0.00E+00 | 9.85E+05 | NA | Inf      | NA | 0.00E+00 |
| 2245 | NA       | NA       | NA | NA | 8.99E+05 | 8.10E+04 | NA | NA       | NA | NA       |
| 2246 | 8.63E+06 | 0.00E+00 | NA | NA | 5.79E+05 | 3.99E+05 | NA | 1.49E+01 | NA | 0.00E+00 |
| 2247 | 0.00E+00 | 3.17E+07 | NA | NA | 7.45E+05 | 2.25E+05 | NA | 0.00E+00 | NA | 1.41E+02 |
| 2248 | NA       | NA       | NA | NA | 7.51E+05 | 2.06E+05 | NA | NA       | NA | NA       |
| 2249 | NA       | NA       | NA | NA | 9.50E+05 | 0.00E+00 | NA | NA       | NA | NA       |
| 2250 | NA       | NA       | NA | NA | 8.99E+05 | 4.34E+04 | NA | NA       | NA | NA       |
| 2251 | 9.32E+05 | 0.00E+00 | NA | NA | NA       | NA       | NA | NA       | NA | NA       |
| 2252 | NA       | NA       | NA | NA | 4.49E+05 | 4.81E+05 | NA | NA       | NA | NA       |
| 2253 | NA       | NA       | NA | NA | 0.00E+00 | 9.20E+05 | NA | NA       | NA | NA       |
| 2254 | 1.84E+07 | 0.00E+00 | NA | NA | 9.75E+04 | 8.13E+05 | NA | 1.88E+02 | NA | 0.00E+00 |
| 2255 | NA       | NA       | NA | NA | 9.10E+05 | 0.00E+00 | NA | NA       | NA | NA       |
| 2256 | 0.00E+00 | 4.05E+06 | NA | NA | 6.80E+05 | 2.20E+05 | NA | 0.00E+00 | NA | 1.84E+01 |
| 2257 | NA       | NA       | NA | NA | 8.34E+05 | 6.22E+04 | NA | NA       | NA | NA       |
| 2258 | NA       | NA       | NA | NA | 8.94E+05 | 0.00E+00 | NA | NA       | NA | NA       |
| 2259 | NA       | NA       | NA | NA | 8.92E+05 | 0.00E+00 | NA | NA       | NA | NA       |
| 2260 | NA       | NA       | NA | NA | 8.90E+05 | 0.00E+00 | NA | NA       | NA | NA       |
| 2261 | NA       | NA       | NA | NA | 0.00E+00 | 8.85E+05 | NA | NA       | NA | NA       |
| 2262 | 0.00E+00 | 8.80E+05 | NA | NA | NA       | NA       | NA | NA       | NA | NA       |
| 2263 | NA       | NA       | NA | NA | 7.20E+05 | 1.59E+05 | NA | NA       | NA | NA       |
| 2264 | NA       | NA       | NA | NA | 8.64E+05 | 0.00E+00 | NA | NA       | NA | NA       |
| 2265 | NA       | NA       | NA | NA | 6.56E+05 | 1.96E+05 | NA | NA       | NA | NA       |
| 2266 | 0.00E+00 | 8.50E+05 | NA | NA | 0.00E+00 | 0.00E+00 | NA | NA       | NA | Inf      |
| 2267 | 0.00E+00 | 8.38E+05 | NA | NA | 0.00E+00 | 0.00E+00 | NA | NA       | NA | Inf      |
| 2268 | NA       | NA       | NA | NA | 8.36E+05 | 0.00E+00 | NA | NA       | NA | NA       |
| 2269 | 3.62E+05 | 0.00E+00 | NA | NA | 8.32E+05 | 0.00E+00 | NA | 4.35E-01 | NA | NA       |
| 2270 | 8.27E+05 | 0.00E+00 | NA | NA | NA       | NA       | NA | NA       | NA | NA       |
| 2271 | 0.00E+00 | 8.22E+05 | NA | NA | NA       | NA       | NA | NA       | NA | NA       |
| 2272 | 0.00E+00 | 8.19E+05 | NA | NA | 0.00E+00 | 0.00E+00 | NA | NA       | NA | Inf      |
| 2273 | 8.18E+05 | 0.00E+00 | NA | NA | NA       | NA       | NA | NA       | NA | NA       |
| 2274 | NA       | NA       | NA | NA | 2.23E+05 | 5.88E+05 | NA | NA       | NA | NA       |
| 2275 | NA       | NA       | NA | NA | 6.40E+05 | 1.66E+05 | NA | NA       | NA | NA       |
| 2276 | 0.00E+00 | 8.05E+05 | NA | NA | NA       | NA       | NA | NA       | NA | NA       |

|      |          |          |    |    |          |          |    |          |    |          |
|------|----------|----------|----|----|----------|----------|----|----------|----|----------|
| 2277 | NA       | NA       | NA | NA | 7.20E+05 | 8.35E+04 | NA | NA       | NA | NA       |
| 2278 | NA       | NA       | NA | NA | 4.59E+05 | 3.41E+05 | NA | NA       | NA | NA       |
| 2279 | NA       | NA       | NA | NA | 7.92E+05 | 0.00E+00 | NA | NA       | NA | NA       |
| 2280 | 4.66E+06 | 1.06E+07 | NA | NA | 0.00E+00 | 7.89E+05 | NA | Inf      | NA | 1.34E+01 |
| 2281 | NA       | NA       | NA | NA | 1.55E+05 | 6.27E+05 | NA | NA       | NA | NA       |
| 2282 | 7.80E+05 | 0.00E+00 | NA | NA | NA       | NA       | NA | NA       | NA | NA       |
| 2283 | 0.00E+00 | 7.78E+05 | NA | NA | 0.00E+00 | 0.00E+00 | NA | NA       | NA | Inf      |
| 2284 | NA       | NA       | NA | NA | 0.00E+00 | 7.77E+05 | NA | NA       | NA | NA       |
| 2285 | 2.36E+06 | 3.78E+06 | NA | NA | 7.74E+05 | 0.00E+00 | NA | 3.05E+00 | NA | Inf      |
| 2286 | 9.47E+06 | 0.00E+00 | NA | NA | 5.65E+05 | 1.94E+05 | NA | 1.68E+01 | NA | 0.00E+00 |
| 2287 | NA       | NA       | NA | NA | 7.56E+05 | 0.00E+00 | NA | NA       | NA | NA       |
| 2288 | 0.00E+00 | 7.56E+05 | NA | NA | NA       | NA       | NA | NA       | NA | NA       |
| 2289 | NA       | NA       | NA | NA | 1.99E+05 | 5.51E+05 | NA | NA       | NA | NA       |
| 2290 | NA       | NA       | NA | NA | 0.00E+00 | 7.45E+05 | NA | NA       | NA | NA       |
| 2291 | NA       | NA       | NA | NA | 4.17E+05 | 3.24E+05 | NA | NA       | NA | NA       |
| 2292 | 0.00E+00 | 7.38E+05 | NA | NA | NA       | NA       | NA | NA       | NA | NA       |
| 2293 | NA       | NA       | NA | NA | 7.37E+05 | 0.00E+00 | NA | NA       | NA | NA       |
| 2294 | 7.36E+05 | 0.00E+00 | NA | NA | NA       | NA       | NA | NA       | NA | NA       |
| 2295 | 7.54E+06 | 0.00E+00 | NA | NA | 4.28E+05 | 3.07E+05 | NA | 1.76E+01 | NA | 0.00E+00 |
| 2296 | 0.00E+00 | 7.28E+05 | NA | NA | 0.00E+00 | 0.00E+00 | NA | NA       | NA | Inf      |
| 2297 | NA       | NA       | NA | NA | 0.00E+00 | 7.24E+05 | NA | NA       | NA | NA       |
| 2298 | NA       | NA       | NA | NA | 7.14E+05 | 0.00E+00 | NA | NA       | NA | NA       |
| 2299 | NA       | NA       | NA | NA | 0.00E+00 | 7.12E+05 | NA | NA       | NA | NA       |
| 2300 | 0.00E+00 | 7.08E+05 | NA | NA | 0.00E+00 | 0.00E+00 | NA | NA       | NA | Inf      |
| 2301 | 0.00E+00 | 1.14E+06 | NA | NA | 7.02E+05 | 0.00E+00 | NA | 0.00E+00 | NA | Inf      |
| 2302 | 6.47E+04 | 0.00E+00 | NA | NA | 0.00E+00 | 6.98E+05 | NA | Inf      | NA | 0.00E+00 |
| 2303 | 1.05E+07 | 2.92E+06 | NA | NA | 6.97E+05 | 0.00E+00 | NA | 1.51E+01 | NA | Inf      |
| 2304 | 0.00E+00 | 6.95E+05 | NA | NA | NA       | NA       | NA | NA       | NA | NA       |
| 2305 | 4.67E+06 | 4.26E+06 | NA | NA | 2.59E+05 | 4.32E+05 | NA | 1.81E+01 | NA | 9.87E+00 |
| 2306 | 6.01E+06 | 0.00E+00 | NA | NA | 0.00E+00 | 6.89E+05 | NA | Inf      | NA | 0.00E+00 |
| 2307 | 1.22E+07 | 0.00E+00 | NA | NA | 0.00E+00 | 6.84E+05 | NA | Inf      | NA | 0.00E+00 |
| 2308 | NA       | NA       | NA | NA | 6.84E+05 | 0.00E+00 | NA | NA       | NA | NA       |
| 2309 | NA       | NA       | NA | NA | 6.76E+05 | 0.00E+00 | NA | NA       | NA | NA       |
| 2310 | NA       | NA       | NA | NA | 6.72E+05 | 0.00E+00 | NA | NA       | NA | NA       |
| 2311 | NA       | NA       | NA | NA | 4.06E+05 | 2.62E+05 | NA | NA       | NA | NA       |
| 2312 | 0.00E+00 | 6.60E+05 | NA | NA | NA       | NA       | NA | NA       | NA | NA       |
| 2313 | NA       | NA       | NA | NA | 6.55E+05 | 0.00E+00 | NA | NA       | NA | NA       |
| 2314 | NA       | NA       | NA | NA | 6.53E+05 | 0.00E+00 | NA | NA       | NA | NA       |

|      |          |          |    |    |          |          |    |          |    |          |
|------|----------|----------|----|----|----------|----------|----|----------|----|----------|
| 2315 | NA       | NA       | NA | NA | 6.53E+05 | 0.00E+00 | NA | NA       | NA | NA       |
| 2316 | NA       | NA       | NA | NA | 5.59E+05 | 9.14E+04 | NA | NA       | NA | NA       |
| 2317 | 0.00E+00 | 6.47E+05 | NA | NA | NA       | NA       | NA | NA       | NA | NA       |
| 2318 | 1.04E+07 | 0.00E+00 | NA | NA | 3.21E+05 | 3.26E+05 | NA | 3.25E+01 | NA | 0.00E+00 |
| 2319 | 1.50E+07 | 0.00E+00 | NA | NA | 4.42E+05 | 2.02E+05 | NA | 3.41E+01 | NA | 0.00E+00 |
| 2320 | NA       | NA       | NA | NA | 5.31E+05 | 1.12E+05 | NA | NA       | NA | NA       |
| 2321 | NA       | NA       | NA | NA | 6.32E+05 | 0.00E+00 | NA | NA       | NA | NA       |
| 2322 | 0.00E+00 | 6.31E+05 | NA | NA | NA       | NA       | NA | NA       | NA | NA       |
| 2323 | NA       | NA       | NA | NA | 3.74E+05 | 2.53E+05 | NA | NA       | NA | NA       |
| 2324 | 0.00E+00 | 1.49E+06 | NA | NA | 6.26E+05 | 0.00E+00 | NA | 0.00E+00 | NA | Inf      |
| 2325 | 1.87E+07 | 5.40E+05 | NA | NA | 6.26E+05 | 0.00E+00 | NA | 2.98E+01 | NA | Inf      |
| 2326 | NA       | NA       | NA | NA | 3.32E+05 | 2.87E+05 | NA | NA       | NA | NA       |
| 2327 | NA       | NA       | NA | NA | 3.20E+05 | 2.97E+05 | NA | NA       | NA | NA       |
| 2328 | NA       | NA       | NA | NA | 3.22E+05 | 2.95E+05 | NA | NA       | NA | NA       |
| 2329 | 6.14E+05 | 0.00E+00 | NA | NA | NA       | NA       | NA | NA       | NA | NA       |
| 2330 | 7.56E+06 | 0.00E+00 | NA | NA | 0.00E+00 | 6.14E+05 | NA | Inf      | NA | 0.00E+00 |
| 2331 | NA       | NA       | NA | NA | 5.90E+04 | 5.55E+05 | NA | NA       | NA | NA       |
| 2332 | 4.09E+06 | 0.00E+00 | NA | NA | 0.00E+00 | 5.97E+05 | NA | Inf      | NA | 0.00E+00 |
| 2333 | NA       | NA       | NA | NA | 5.94E+05 | 0.00E+00 | NA | NA       | NA | NA       |
| 2334 | NA       | NA       | NA | NA | 1.72E+05 | 4.20E+05 | NA | NA       | NA | NA       |
| 2335 | 5.90E+05 | 0.00E+00 | NA | NA | NA       | NA       | NA | NA       | NA | NA       |
| 2336 | 1.31E+05 | 0.00E+00 | NA | NA | 0.00E+00 | 5.89E+05 | NA | Inf      | NA | 0.00E+00 |
| 2337 | NA       | NA       | NA | NA | 5.81E+05 | 0.00E+00 | NA | NA       | NA | NA       |
| 2338 | NA       | NA       | NA | NA | 5.09E+04 | 5.26E+05 | NA | NA       | NA | NA       |
| 2339 | 0.00E+00 | 5.74E+05 | NA | NA | NA       | NA       | NA | NA       | NA | NA       |
| 2340 | 0.00E+00 | 3.23E+06 | NA | NA | 4.17E+05 | 1.54E+05 | NA | 0.00E+00 | NA | 2.10E+01 |
| 2341 | 0.00E+00 | 9.04E+06 | NA | NA | 4.32E+05 | 1.39E+05 | NA | 0.00E+00 | NA | 6.53E+01 |
| 2342 | 5.69E+05 | 0.00E+00 | NA | NA | 0.00E+00 | 0.00E+00 | NA | Inf      | NA | NA       |
| 2343 | NA       | NA       | NA | NA | 5.67E+05 | 0.00E+00 | NA | NA       | NA | NA       |
| 2344 | NA       | NA       | NA | NA | 5.66E+05 | 0.00E+00 | NA | NA       | NA | NA       |
| 2345 | 0.00E+00 | 5.65E+05 | NA | NA | NA       | NA       | NA | NA       | NA | NA       |
| 2346 | 1.91E+06 | 0.00E+00 | NA | NA | 3.10E+05 | 2.53E+05 | NA | 6.16E+00 | NA | 0.00E+00 |
| 2347 | NA       | NA       | NA | NA | 3.65E+05 | 1.91E+05 | NA | NA       | NA | NA       |
| 2348 | NA       | NA       | NA | NA | 5.55E+05 | 0.00E+00 | NA | NA       | NA | NA       |
| 2349 | 0.00E+00 | 2.53E+06 | NA | NA | 4.78E+05 | 7.41E+04 | NA | 0.00E+00 | NA | 3.41E+01 |
| 2350 | NA       | NA       | NA | NA | 4.64E+05 | 8.73E+04 | NA | NA       | NA | NA       |
| 2351 | NA       | NA       | NA | NA | 2.31E+05 | 3.19E+05 | NA | NA       | NA | NA       |
| 2352 | 0.00E+00 | 5.46E+05 | NA | NA | NA       | NA       | NA | NA       | NA | NA       |

|      |          |          |    |    |          |          |    |          |    |          |
|------|----------|----------|----|----|----------|----------|----|----------|----|----------|
| 2353 | NA       | NA       | NA | NA | 5.43E+05 | 0.00E+00 | NA | NA       | NA | NA       |
| 2354 | 0.00E+00 | 5.42E+05 | NA | NA | NA       | NA       | NA | NA       | NA | NA       |
| 2355 | NA       | NA       | NA | NA | 1.07E+05 | 4.32E+05 | NA | NA       | NA | NA       |
| 2356 | NA       | NA       | NA | NA | 3.77E+05 | 1.58E+05 | NA | NA       | NA | NA       |
| 2357 | NA       | NA       | NA | NA | 5.34E+05 | 0.00E+00 | NA | NA       | NA | NA       |
| 2358 | NA       | NA       | NA | NA | 4.41E+05 | 8.28E+04 | NA | NA       | NA | NA       |
| 2359 | 1.03E+07 | 0.00E+00 | NA | NA | 5.20E+05 | 0.00E+00 | NA | 1.97E+01 | NA | NA       |
| 2360 | NA       | NA       | NA | NA | 0.00E+00 | 5.18E+05 | NA | NA       | NA | NA       |
| 2361 | NA       | NA       | NA | NA | 3.24E+05 | 1.93E+05 | NA | NA       | NA | NA       |
| 2362 | 0.00E+00 | 2.15E+05 | NA | NA | 3.44E+05 | 1.71E+05 | NA | 0.00E+00 | NA | 1.26E+00 |
| 2363 | NA       | NA       | NA | NA | 4.07E+05 | 1.01E+05 | NA | NA       | NA | NA       |
| 2364 | 9.24E+06 | 1.65E+06 | NA | NA | 2.77E+05 | 2.27E+05 | NA | 3.33E+01 | NA | 7.29E+00 |
| 2365 | NA       | NA       | NA | NA | 5.03E+05 | 0.00E+00 | NA | NA       | NA | NA       |
| 2366 | NA       | NA       | NA | NA | 4.81E+04 | 4.52E+05 | NA | NA       | NA | NA       |
| 2367 | NA       | NA       | NA | NA | 4.98E+05 | 0.00E+00 | NA | NA       | NA | NA       |
| 2368 | 5.38E+06 | 0.00E+00 | NA | NA | 4.98E+05 | 0.00E+00 | NA | 1.08E+01 | NA | NA       |
| 2369 | NA       | NA       | NA | NA | 3.78E+05 | 1.20E+05 | NA | NA       | NA | NA       |
| 2370 | 7.96E+05 | 0.00E+00 | NA | NA | 0.00E+00 | 4.94E+05 | NA | Inf      | NA | 0.00E+00 |
| 2371 | 1.80E+05 | 0.00E+00 | NA | NA | 4.19E+05 | 7.10E+04 | NA | 4.30E-01 | NA | 0.00E+00 |
| 2372 | NA       | NA       | NA | NA | 4.90E+05 | 0.00E+00 | NA | NA       | NA | NA       |
| 2373 | 0.00E+00 | 4.85E+05 | NA | NA | NA       | NA       | NA | NA       | NA | NA       |
| 2374 | 4.83E+05 | 0.00E+00 | NA | NA | NA       | NA       | NA | NA       | NA | NA       |
| 2375 | 2.81E+06 | 0.00E+00 | NA | NA | 2.95E+05 | 1.85E+05 | NA | 9.54E+00 | NA | 0.00E+00 |
| 2376 | 0.00E+00 | 4.69E+05 | NA | NA | NA       | NA       | NA | NA       | NA | NA       |
| 2377 | NA       | NA       | NA | NA | 4.68E+05 | 0.00E+00 | NA | NA       | NA | NA       |
| 2378 | NA       | NA       | NA | NA | 3.32E+05 | 1.36E+05 | NA | NA       | NA | NA       |
| 2379 | 0.00E+00 | 4.67E+05 | NA | NA | NA       | NA       | NA | NA       | NA | NA       |
| 2380 | NA       | NA       | NA | NA | 2.89E+05 | 1.76E+05 | NA | NA       | NA | NA       |
| 2381 | NA       | NA       | NA | NA | 4.61E+05 | 0.00E+00 | NA | NA       | NA | NA       |
| 2382 | 2.28E+06 | 0.00E+00 | NA | NA | 4.58E+05 | 0.00E+00 | NA | 4.97E+00 | NA | NA       |
| 2383 | 8.93E+06 | 3.88E+06 | NA | NA | 1.59E+05 | 2.97E+05 | NA | 5.62E+01 | NA | 1.31E+01 |
| 2384 | 0.00E+00 | 1.98E+06 | NA | NA | 4.54E+05 | 0.00E+00 | NA | 0.00E+00 | NA | Inf      |
| 2385 | 4.54E+05 | 0.00E+00 | NA | NA | NA       | NA       | NA | NA       | NA | NA       |
| 2386 | 4.54E+05 | 0.00E+00 | NA | NA | NA       | NA       | NA | NA       | NA | NA       |
| 2387 | 0.00E+00 | 4.52E+05 | NA | NA | 0.00E+00 | 0.00E+00 | NA | NA       | NA | Inf      |
| 2388 | 0.00E+00 | 4.52E+05 | NA | NA | 0.00E+00 | 0.00E+00 | NA | NA       | NA | Inf      |
| 2389 | NA       | NA       | NA | NA | 4.44E+05 | 0.00E+00 | NA | NA       | NA | NA       |
| 2390 | 4.41E+05 | 0.00E+00 | NA | NA | NA       | NA       | NA | NA       | NA | NA       |

|      |          |          |    |    |          |          |    |          |    |          |
|------|----------|----------|----|----|----------|----------|----|----------|----|----------|
| 2391 | 6.07E+06 | 0.00E+00 | NA | NA | 0.00E+00 | 4.40E+05 | NA | Inf      | NA | 0.00E+00 |
| 2392 | NA       | NA       | NA | NA | 3.04E+05 | 1.35E+05 | NA | NA       | NA | NA       |
| 2393 | NA       | NA       | NA | NA | 4.38E+05 | 0.00E+00 | NA | NA       | NA | NA       |
| 2394 | NA       | NA       | NA | NA | 4.29E+05 | 0.00E+00 | NA | NA       | NA | NA       |
| 2395 | NA       | NA       | NA | NA | 3.86E+05 | 4.01E+04 | NA | NA       | NA | NA       |
| 2396 | 4.26E+05 | 0.00E+00 | NA | NA | NA       | NA       | NA | NA       | NA | NA       |
| 2397 | 2.27E+06 | 0.00E+00 | NA | NA | 4.23E+05 | 0.00E+00 | NA | 5.37E+00 | NA | NA       |
| 2398 | NA       | NA       | NA | NA | 0.00E+00 | 4.22E+05 | NA | NA       | NA | NA       |
| 2399 | 0.00E+00 | 4.22E+05 | NA | NA | NA       | NA       | NA | NA       | NA | NA       |
| 2400 | NA       | NA       | NA | NA | 4.21E+05 | 0.00E+00 | NA | NA       | NA | NA       |
| 2401 | NA       | NA       | NA | NA | 4.16E+05 | 0.00E+00 | NA | NA       | NA | NA       |
| 2402 | NA       | NA       | NA | NA | 4.13E+05 | 0.00E+00 | NA | NA       | NA | NA       |
| 2403 | NA       | NA       | NA | NA | 4.12E+05 | 0.00E+00 | NA | NA       | NA | NA       |
| 2404 | NA       | NA       | NA | NA | 4.09E+05 | 0.00E+00 | NA | NA       | NA | NA       |
| 2405 | 2.26E+06 | 1.01E+08 | NA | NA | 0.00E+00 | 4.09E+05 | NA | Inf      | NA | 2.46E+02 |
| 2406 | 2.74E+07 | 6.28E+06 | NA | NA | 0.00E+00 | 4.07E+05 | NA | Inf      | NA | 1.54E+01 |
| 2407 | NA       | NA       | NA | NA | 0.00E+00 | 4.06E+05 | NA | NA       | NA | NA       |
| 2408 | 0.00E+00 | 4.03E+05 | NA | NA | NA       | NA       | NA | NA       | NA | NA       |
| 2409 | 4.59E+05 | 0.00E+00 | NA | NA | 4.02E+05 | 0.00E+00 | NA | 1.14E+00 | NA | NA       |
| 2410 | 0.00E+00 | 3.97E+05 | NA | NA | NA       | NA       | NA | NA       | NA | NA       |
| 2411 | 1.05E+06 | 0.00E+00 | NA | NA | 3.93E+05 | 0.00E+00 | NA | 2.67E+00 | NA | NA       |
| 2412 | 3.90E+05 | 0.00E+00 | NA | NA | NA       | NA       | NA | NA       | NA | NA       |
| 2413 | NA       | NA       | NA | NA | 0.00E+00 | 3.89E+05 | NA | NA       | NA | NA       |
| 2414 | 4.61E+06 | 1.74E+06 | NA | NA | 3.52E+05 | 3.42E+04 | NA | 1.31E+01 | NA | 5.08E+01 |
| 2415 | 0.00E+00 | 3.84E+05 | NA | NA | NA       | NA       | NA | NA       | NA | NA       |
| 2416 | NA       | NA       | NA | NA | 3.82E+05 | 0.00E+00 | NA | NA       | NA | NA       |
| 2417 | NA       | NA       | NA | NA | 3.90E+04 | 3.37E+05 | NA | NA       | NA | NA       |
| 2418 | 2.15E+06 | 2.38E+06 | NA | NA | 1.80E+05 | 1.94E+05 | NA | 1.19E+01 | NA | 1.22E+01 |
| 2419 | NA       | NA       | NA | NA | 0.00E+00 | 3.74E+05 | NA | NA       | NA | NA       |
| 2420 | NA       | NA       | NA | NA | 3.73E+05 | 0.00E+00 | NA | NA       | NA | NA       |
| 2421 | 0.00E+00 | 3.70E+05 | NA | NA | NA       | NA       | NA | NA       | NA | NA       |
| 2422 | 0.00E+00 | 9.47E+06 | NA | NA | 2.62E+05 | 1.07E+05 | NA | 0.00E+00 | NA | 8.88E+01 |
| 2423 | NA       | NA       | NA | NA | 3.68E+05 | 0.00E+00 | NA | NA       | NA | NA       |
| 2424 | 6.85E+06 | 0.00E+00 | NA | NA | 6.24E+04 | 3.04E+05 | NA | 1.10E+02 | NA | 0.00E+00 |
| 2425 | 1.90E+06 | 0.00E+00 | NA | NA | 0.00E+00 | 3.65E+05 | NA | Inf      | NA | 0.00E+00 |
| 2426 | NA       | NA       | NA | NA | 2.46E+05 | 1.18E+05 | NA | NA       | NA | NA       |
| 2427 | NA       | NA       | NA | NA | 3.63E+05 | 0.00E+00 | NA | NA       | NA | NA       |
| 2428 | NA       | NA       | NA | NA | 3.61E+05 | 0.00E+00 | NA | NA       | NA | NA       |



|      |          |          |    |    |          |          |    |          |    |          |
|------|----------|----------|----|----|----------|----------|----|----------|----|----------|
| 2429 | NA       | NA       | NA | NA | 3.59E+05 | 0.00E+00 | NA | NA       | NA | NA       |
| 2430 | NA       | NA       | NA | NA | 3.58E+05 | 0.00E+00 | NA | NA       | NA | NA       |
| 2431 | NA       | NA       | NA | NA | 3.57E+05 | 0.00E+00 | NA | NA       | NA | NA       |
| 2432 | 0.00E+00 | 3.55E+05 | NA | NA | 0.00E+00 | 0.00E+00 | NA | NA       | NA | Inf      |
| 2433 | NA       | NA       | NA | NA | 3.54E+05 | 0.00E+00 | NA | NA       | NA | NA       |
| 2434 | 3.53E+05 | 0.00E+00 | NA | NA | NA       | NA       | NA | NA       | NA | NA       |
| 2435 | NA       | NA       | NA | NA | 0.00E+00 | 3.46E+05 | NA | NA       | NA | NA       |
| 2436 | NA       | NA       | NA | NA | 3.45E+05 | 0.00E+00 | NA | NA       | NA | NA       |
| 2437 | NA       | NA       | NA | NA | 3.44E+05 | 0.00E+00 | NA | NA       | NA | NA       |
| 2438 | NA       | NA       | NA | NA | 3.41E+05 | 0.00E+00 | NA | NA       | NA | NA       |
| 2439 | NA       | NA       | NA | NA | 3.40E+05 | 0.00E+00 | NA | NA       | NA | NA       |
| 2440 | 3.28E+06 | 9.29E+06 | NA | NA | 3.39E+05 | 0.00E+00 | NA | 9.68E+00 | NA | Inf      |
| 2441 | 9.72E+05 | 0.00E+00 | NA | NA | 2.89E+05 | 4.43E+04 | NA | 3.36E+00 | NA | 0.00E+00 |
| 2442 | NA       | NA       | NA | NA | 8.93E+04 | 2.43E+05 | NA | NA       | NA | NA       |
| 2443 | NA       | NA       | NA | NA | 3.32E+05 | 0.00E+00 | NA | NA       | NA | NA       |
| 2444 | 2.70E+06 | 0.00E+00 | NA | NA | 9.61E+04 | 2.36E+05 | NA | 2.81E+01 | NA | 0.00E+00 |
| 2445 | NA       | NA       | NA | NA | 1.35E+05 | 1.96E+05 | NA | NA       | NA | NA       |
| 2446 | 8.11E+06 | 0.00E+00 | NA | NA | 0.00E+00 | 3.31E+05 | NA | Inf      | NA | 0.00E+00 |
| 2447 | NA       | NA       | NA | NA | 3.25E+05 | 0.00E+00 | NA | NA       | NA | NA       |
| 2448 | 7.57E+06 | 9.49E+05 | NA | NA | 0.00E+00 | 3.24E+05 | NA | Inf      | NA | 2.93E+00 |
| 2449 | NA       | NA       | NA | NA | 3.23E+05 | 0.00E+00 | NA | NA       | NA | NA       |
| 2450 | NA       | NA       | NA | NA | 0.00E+00 | 3.21E+05 | NA | NA       | NA | NA       |
| 2451 | 0.00E+00 | 3.20E+05 | NA | NA | NA       | NA       | NA | NA       | NA | NA       |
| 2452 | 3.38E+06 | 0.00E+00 | NA | NA | 0.00E+00 | 3.19E+05 | NA | Inf      | NA | 0.00E+00 |
| 2453 | 3.71E+06 | 0.00E+00 | NA | NA | 0.00E+00 | 3.19E+05 | NA | Inf      | NA | 0.00E+00 |
| 2454 | NA       | NA       | NA | NA | 3.17E+05 | 0.00E+00 | NA | NA       | NA | NA       |
| 2455 | NA       | NA       | NA | NA | 3.16E+05 | 0.00E+00 | NA | NA       | NA | NA       |
| 2456 | NA       | NA       | NA | NA | 0.00E+00 | 3.14E+05 | NA | NA       | NA | NA       |
| 2457 | 9.29E+05 | 0.00E+00 | NA | NA | 2.34E+05 | 7.95E+04 | NA | 3.97E+00 | NA | 0.00E+00 |
| 2458 | NA       | NA       | NA | NA | 3.13E+05 | 0.00E+00 | NA | NA       | NA | NA       |
| 2459 | NA       | NA       | NA | NA | 3.13E+05 | 0.00E+00 | NA | NA       | NA | NA       |
| 2460 | NA       | NA       | NA | NA | 3.12E+05 | 0.00E+00 | NA | NA       | NA | NA       |
| 2461 | NA       | NA       | NA | NA | 3.06E+05 | 0.00E+00 | NA | NA       | NA | NA       |
| 2462 | 2.12E+06 | 3.41E+07 | NA | NA | 3.05E+05 | 0.00E+00 | NA | 6.94E+00 | NA | Inf      |
| 2463 | 1.27E+06 | 0.00E+00 | NA | NA | 3.05E+05 | 0.00E+00 | NA | 4.16E+00 | NA | NA       |
| 2464 | 0.00E+00 | 3.04E+05 | NA | NA | NA       | NA       | NA | NA       | NA | NA       |
| 2465 | 0.00E+00 | 1.71E+06 | NA | NA | 0.00E+00 | 3.03E+05 | NA | NA       | NA | 5.64E+00 |
| 2466 | NA       | NA       | NA | NA | 3.02E+05 | 0.00E+00 | NA | NA       | NA | NA       |

|      |          |          |    |    |          |          |    |          |    |          |
|------|----------|----------|----|----|----------|----------|----|----------|----|----------|
| 2467 | 0.00E+00 | 3.01E+05 | NA | NA | NA       | NA       | NA | NA       | NA | NA       |
| 2468 | 0.00E+00 | 2.97E+05 | NA | NA | NA       | NA       | NA | NA       | NA | NA       |
| 2469 | NA       | NA       | NA | NA | 2.94E+05 | 0.00E+00 | NA | NA       | NA | NA       |
| 2470 | 0.00E+00 | 5.11E+06 | NA | NA | 6.57E+04 | 2.27E+05 | NA | 0.00E+00 | NA | 2.25E+01 |
| 2471 | NA       | NA       | NA | NA | 2.92E+05 | 0.00E+00 | NA | NA       | NA | NA       |
| 2472 | NA       | NA       | NA | NA | 2.91E+05 | 0.00E+00 | NA | NA       | NA | NA       |
| 2473 | NA       | NA       | NA | NA | 5.11E+04 | 2.40E+05 | NA | NA       | NA | NA       |
| 2474 | 0.00E+00 | 2.90E+05 | NA | NA | NA       | NA       | NA | NA       | NA | NA       |
| 2475 | 2.90E+05 | 0.00E+00 | NA | NA | NA       | NA       | NA | NA       | NA | NA       |
| 2476 | NA       | NA       | NA | NA | 2.85E+05 | 0.00E+00 | NA | NA       | NA | NA       |
| 2477 | NA       | NA       | NA | NA | 2.83E+05 | 0.00E+00 | NA | NA       | NA | NA       |
| 2478 | NA       | NA       | NA | NA | 2.83E+05 | 0.00E+00 | NA | NA       | NA | NA       |
| 2479 | 1.95E+06 | 6.66E+06 | NA | NA | 2.83E+05 | 0.00E+00 | NA | 6.90E+00 | NA | Inf      |
| 2480 | NA       | NA       | NA | NA | 0.00E+00 | 2.81E+05 | NA | NA       | NA | NA       |
| 2481 | 2.77E+05 | 0.00E+00 | NA | NA | NA       | NA       | NA | NA       | NA | NA       |
| 2482 | NA       | NA       | NA | NA | 1.84E+05 | 9.21E+04 | NA | NA       | NA | NA       |
| 2483 | NA       | NA       | NA | NA | 2.74E+05 | 0.00E+00 | NA | NA       | NA | NA       |
| 2484 | NA       | NA       | NA | NA | 0.00E+00 | 2.70E+05 | NA | NA       | NA | NA       |
| 2485 | 5.78E+06 | 0.00E+00 | NA | NA | 0.00E+00 | 2.69E+05 | NA | Inf      | NA | 0.00E+00 |
| 2486 | NA       | NA       | NA | NA | 1.01E+05 | 1.67E+05 | NA | NA       | NA | NA       |
| 2487 | NA       | NA       | NA | NA | 0.00E+00 | 2.68E+05 | NA | NA       | NA | NA       |
| 2488 | NA       | NA       | NA | NA | 2.68E+05 | 0.00E+00 | NA | NA       | NA | NA       |
| 2489 | NA       | NA       | NA | NA | 2.64E+05 | 0.00E+00 | NA | NA       | NA | NA       |
| 2490 | 2.61E+05 | 0.00E+00 | NA | NA | NA       | NA       | NA | NA       | NA | NA       |
| 2491 | NA       | NA       | NA | NA | 1.91E+05 | 6.93E+04 | NA | NA       | NA | NA       |
| 2492 | NA       | NA       | NA | NA | 2.60E+05 | 0.00E+00 | NA | NA       | NA | NA       |
| 2493 | 0.00E+00 | 2.59E+05 | NA | NA | NA       | NA       | NA | NA       | NA | NA       |
| 2494 | NA       | NA       | NA | NA | 0.00E+00 | 2.58E+05 | NA | NA       | NA | NA       |
| 2495 | NA       | NA       | NA | NA | 2.58E+05 | 0.00E+00 | NA | NA       | NA | NA       |
| 2496 | 0.00E+00 | 2.58E+05 | NA | NA | NA       | NA       | NA | NA       | NA | NA       |
| 2497 | NA       | NA       | NA | NA | 0.00E+00 | 2.57E+05 | NA | NA       | NA | NA       |
| 2498 | 3.49E+05 | 8.28E+06 | NA | NA | 0.00E+00 | 2.55E+05 | NA | Inf      | NA | 3.25E+01 |
| 2499 | NA       | NA       | NA | NA | 2.54E+05 | 0.00E+00 | NA | NA       | NA | NA       |
| 2500 | 0.00E+00 | 2.92E+07 | NA | NA | 2.54E+05 | 0.00E+00 | NA | 0.00E+00 | NA | Inf      |
| 2501 | 2.53E+05 | 0.00E+00 | NA | NA | NA       | NA       | NA | NA       | NA | NA       |
| 2502 | 2.29E+06 | 0.00E+00 | NA | NA | 0.00E+00 | 2.51E+05 | NA | Inf      | NA | 0.00E+00 |
| 2503 | 4.10E+06 | 0.00E+00 | NA | NA | 1.70E+05 | 7.81E+04 | NA | 2.41E+01 | NA | 0.00E+00 |
| 2504 | NA       | NA       | NA | NA | 2.47E+05 | 0.00E+00 | NA | NA       | NA | NA       |

|      |          |          |          |          |          |          |    |          |    |          |
|------|----------|----------|----------|----------|----------|----------|----|----------|----|----------|
| 2505 | 6.73E+06 | 0.00E+00 | NA       | NA       | 0.00E+00 | 2.44E+05 | NA | Inf      | NA | 0.00E+00 |
| 2506 | NA       | NA       | NA       | NA       | 1.97E+05 | 4.36E+04 | NA | NA       | NA | NA       |
| 2507 | 8.47E+05 | 1.73E+06 | NA       | NA       | 6.87E+04 | 1.72E+05 | NA | 1.23E+01 | NA | 1.01E+01 |
| 2508 | NA       | NA       | NA       | NA       | 1.91E+05 | 4.96E+04 | NA | NA       | NA | NA       |
| 2509 | 4.57E+06 | 0.00E+00 | NA       | NA       | 0.00E+00 | 2.40E+05 | NA | Inf      | NA | 0.00E+00 |
| 2510 | NA       | NA       | NA       | NA       | 2.35E+05 | 0.00E+00 | NA | NA       | NA | NA       |
| 2511 | 6.05E+05 | 0.00E+00 | NA       | NA       | 2.34E+05 | 0.00E+00 | NA | 2.58E+00 | NA | NA       |
| 2512 | NA       | NA       | NA       | NA       | 2.34E+05 | 0.00E+00 | NA | NA       | NA | NA       |
| 2513 | NA       | NA       | NA       | NA       | 2.33E+05 | 0.00E+00 | NA | NA       | NA | NA       |
| 2514 | 2.32E+05 | 0.00E+00 | NA       | NA       | NA       | NA       | NA | NA       | NA | NA       |
| 2515 | NA       | NA       | NA       | NA       | 2.29E+05 | 0.00E+00 | NA | NA       | NA | NA       |
| 2516 | 2.35E+06 | 0.00E+00 | NA       | NA       | 1.45E+05 | 8.40E+04 | NA | 1.62E+01 | NA | 0.00E+00 |
| 2517 | 0.00E+00 | 2.29E+05 | NA       | NA       | NA       | NA       | NA | NA       | NA | NA       |
| 2518 | 0.00E+00 | 2.28E+05 | NA       | NA       | 0.00E+00 | 0.00E+00 | NA | NA       | NA | Inf      |
| 2519 | NA       | NA       | NA       | NA       | 2.27E+05 | 0.00E+00 | NA | NA       | NA | NA       |
| 2520 | 0.00E+00 | 1.46E+06 | NA       | NA       | 0.00E+00 | 2.26E+05 | NA | NA       | NA | 6.43E+00 |
| 2521 | NA       | NA       | NA       | NA       | 2.24E+05 | 0.00E+00 | NA | NA       | NA | NA       |
| 2522 | NA       | NA       | NA       | NA       | 2.24E+05 | 0.00E+00 | NA | NA       | NA | NA       |
| 2523 | 3.25E+06 | 0.00E+00 | NA       | NA       | 0.00E+00 | 2.20E+05 | NA | Inf      | NA | 0.00E+00 |
| 2524 | 0.00E+00 | 0.00E+00 | NA       | NA       | 2.18E+05 | 0.00E+00 | NA | 0.00E+00 | NA | NA       |
| 2525 | NA       | NA       | NA       | NA       | 2.18E+05 | 0.00E+00 | NA | NA       | NA | NA       |
| 2526 | NA       | NA       | NA       | NA       | 1.60E+05 | 5.43E+04 | NA | NA       | NA | NA       |
| 2527 | 6.06E+05 | 0.00E+00 | NA       | NA       | 1.69E+05 | 4.42E+04 | NA | 3.59E+00 | NA | 0.00E+00 |
| 2528 | NA       | NA       | NA       | NA       | 2.11E+05 | 0.00E+00 | NA | NA       | NA | NA       |
| 2529 | NA       | NA       | NA       | NA       | 2.11E+05 | 0.00E+00 | NA | NA       | NA | NA       |
| 2530 | NA       | NA       | NA       | NA       | 0.00E+00 | 2.11E+05 | NA | NA       | NA | NA       |
| 2531 | NA       | NA       | NA       | NA       | 2.10E+05 | 0.00E+00 | NA | NA       | NA | NA       |
| 2532 | NA       | NA       | NA       | NA       | 2.10E+05 | 0.00E+00 | NA | NA       | NA | NA       |
| 2533 | NA       | NA       | NA       | NA       | 2.09E+05 | 0.00E+00 | NA | NA       | NA | NA       |
| 2534 | 2.09E+05 | 0.00E+00 | NA       | NA       | NA       | NA       | NA | NA       | NA | NA       |
| 2535 | NA       | NA       | NA       | NA       | 2.08E+05 | 0.00E+00 | NA | NA       | NA | NA       |
| 2536 | 0.00E+00 | 1.64E+06 | NA       | NA       | 1.02E+05 | 1.06E+05 | NA | 0.00E+00 | NA | 1.55E+01 |
| 2537 | 0.00E+00 | 1.96E+06 | NA       | NA       | 2.07E+05 | 0.00E+00 | NA | 0.00E+00 | NA | Inf      |
| 2538 | NA       | NA       | NA       | NA       | 2.07E+05 | 0.00E+00 | NA | NA       | NA | NA       |
| 2539 | NA       | NA       | NA       | NA       | 2.07E+05 | 0.00E+00 | NA | NA       | NA | NA       |
| 2540 | NA       | NA       | 0.00E+00 | 0.00E+00 | 2.06E+05 | 0.00E+00 | NA | NA       | NA | NA       |
| 2541 | NA       | NA       | NA       | NA       | 2.06E+05 | 0.00E+00 | NA | NA       | NA | NA       |
| 2542 | NA       | NA       | NA       | NA       | 2.04E+05 | 0.00E+00 | NA | NA       | NA | NA       |

|      |          |          |    |    |          |          |    |          |    |          |
|------|----------|----------|----|----|----------|----------|----|----------|----|----------|
| 2543 | NA       | NA       | NA | NA | 2.04E+05 | 0.00E+00 | NA | NA       | NA | NA       |
| 2544 | 7.31E+06 | 0.00E+00 | NA | NA | 0.00E+00 | 2.03E+05 | NA | Inf      | NA | 0.00E+00 |
| 2545 | NA       | NA       | NA | NA | 2.02E+05 | 0.00E+00 | NA | NA       | NA | NA       |
| 2546 | NA       | NA       | NA | NA | 2.00E+05 | 0.00E+00 | NA | NA       | NA | NA       |
| 2547 | NA       | NA       | NA | NA | 4.75E+04 | 1.52E+05 | NA | NA       | NA | NA       |
| 2548 | NA       | NA       | NA | NA | 1.99E+05 | 0.00E+00 | NA | NA       | NA | NA       |
| 2549 | NA       | NA       | NA | NA | 1.99E+05 | 0.00E+00 | NA | NA       | NA | NA       |
| 2550 | NA       | NA       | NA | NA | 0.00E+00 | 1.98E+05 | NA | NA       | NA | NA       |
| 2551 | NA       | NA       | NA | NA | 8.25E+04 | 1.15E+05 | NA | NA       | NA | NA       |
| 2552 | NA       | NA       | NA | NA | 0.00E+00 | 1.97E+05 | NA | NA       | NA | NA       |
| 2553 | 0.00E+00 | 1.24E+06 | NA | NA | 1.95E+05 | 0.00E+00 | NA | 0.00E+00 | NA | Inf      |
| 2554 | NA       | NA       | NA | NA | 1.95E+05 | 0.00E+00 | NA | NA       | NA | NA       |
| 2555 | 3.45E+06 | 0.00E+00 | NA | NA | 1.93E+05 | 0.00E+00 | NA | 1.79E+01 | NA | NA       |
| 2556 | NA       | NA       | NA | NA | 0.00E+00 | 1.93E+05 | NA | NA       | NA | NA       |
| 2557 | 8.54E+06 | 0.00E+00 | NA | NA | 1.92E+05 | 0.00E+00 | NA | 4.44E+01 | NA | NA       |
| 2558 | NA       | NA       | NA | NA | 0.00E+00 | 1.89E+05 | NA | NA       | NA | NA       |
| 2559 | NA       | NA       | NA | NA | 0.00E+00 | 1.89E+05 | NA | NA       | NA | NA       |
| 2560 | NA       | NA       | NA | NA | 0.00E+00 | 1.89E+05 | NA | NA       | NA | NA       |
| 2561 | 1.92E+06 | 0.00E+00 | NA | NA | 0.00E+00 | 1.88E+05 | NA | Inf      | NA | 0.00E+00 |
| 2562 | 2.23E+05 | 0.00E+00 | NA | NA | 1.87E+05 | 0.00E+00 | NA | 1.19E+00 | NA | NA       |
| 2563 | NA       | NA       | NA | NA | 1.87E+05 | 0.00E+00 | NA | NA       | NA | NA       |
| 2564 | NA       | NA       | NA | NA | 0.00E+00 | 1.84E+05 | NA | NA       | NA | NA       |
| 2565 | NA       | NA       | NA | NA | 0.00E+00 | 1.84E+05 | NA | NA       | NA | NA       |
| 2566 | NA       | NA       | NA | NA | 0.00E+00 | 1.83E+05 | NA | NA       | NA | NA       |
| 2567 | NA       | NA       | NA | NA | 1.81E+05 | 0.00E+00 | NA | NA       | NA | NA       |
| 2568 | NA       | NA       | NA | NA | 1.80E+05 | 0.00E+00 | NA | NA       | NA | NA       |
| 2569 | 2.67E+06 | 0.00E+00 | NA | NA | 1.80E+05 | 0.00E+00 | NA | 1.48E+01 | NA | NA       |
| 2570 | NA       | NA       | NA | NA | 0.00E+00 | 1.80E+05 | NA | NA       | NA | NA       |
| 2571 | 9.20E+05 | 6.43E+06 | NA | NA | 0.00E+00 | 1.78E+05 | NA | Inf      | NA | 3.62E+01 |
| 2572 | NA       | NA       | NA | NA | 1.15E+05 | 6.15E+04 | NA | NA       | NA | NA       |
| 2573 | 3.10E+06 | 0.00E+00 | NA | NA | 0.00E+00 | 1.73E+05 | NA | Inf      | NA | 0.00E+00 |
| 2574 | 5.88E+06 | 0.00E+00 | NA | NA | 0.00E+00 | 1.73E+05 | NA | Inf      | NA | 0.00E+00 |
| 2575 | NA       | NA       | NA | NA | 1.71E+05 | 0.00E+00 | NA | NA       | NA | NA       |
| 2576 | NA       | NA       | NA | NA | 1.71E+05 | 0.00E+00 | NA | NA       | NA | NA       |
| 2577 | NA       | NA       | NA | NA | 0.00E+00 | 1.69E+05 | NA | NA       | NA | NA       |
| 2578 | 6.45E+06 | 0.00E+00 | NA | NA | 0.00E+00 | 1.68E+05 | NA | Inf      | NA | 0.00E+00 |
| 2579 | NA       | NA       | NA | NA | 0.00E+00 | 1.68E+05 | NA | NA       | NA | NA       |
| 2580 | NA       | NA       | NA | NA | 1.67E+05 | 0.00E+00 | NA | NA       | NA | NA       |

|      |          |          |    |    |          |          |    |          |    |          |
|------|----------|----------|----|----|----------|----------|----|----------|----|----------|
| 2581 | NA       | NA       | NA | NA | 9.15E+04 | 7.37E+04 | NA | NA       | NA | NA       |
| 2582 | NA       | NA       | NA | NA | 1.65E+05 | 0.00E+00 | NA | NA       | NA | NA       |
| 2583 | NA       | NA       | NA | NA | 0.00E+00 | 1.64E+05 | NA | NA       | NA | NA       |
| 2584 | NA       | NA       | NA | NA | 0.00E+00 | 1.64E+05 | NA | NA       | NA | NA       |
| 2585 | NA       | NA       | NA | NA | 1.63E+05 | 0.00E+00 | NA | NA       | NA | NA       |
| 2586 | NA       | NA       | NA | NA | 0.00E+00 | 1.63E+05 | NA | NA       | NA | NA       |
| 2587 | NA       | NA       | NA | NA | 1.59E+05 | 0.00E+00 | NA | NA       | NA | NA       |
| 2588 | NA       | NA       | NA | NA | 0.00E+00 | 1.59E+05 | NA | NA       | NA | NA       |
| 2589 | 1.11E+06 | 0.00E+00 | NA | NA | 1.21E+05 | 3.61E+04 | NA | 9.17E+00 | NA | 0.00E+00 |
| 2590 | NA       | NA       | NA | NA | 5.54E+04 | 9.91E+04 | NA | NA       | NA | NA       |
| 2591 | NA       | NA       | NA | NA | 0.00E+00 | 1.51E+05 | NA | NA       | NA | NA       |
| 2592 | NA       | NA       | NA | NA | 1.48E+05 | 0.00E+00 | NA | NA       | NA | NA       |
| 2593 | 0.00E+00 | 1.48E+05 | NA | NA | NA       | NA       | NA | NA       | NA | NA       |
| 2594 | NA       | NA       | NA | NA | 1.45E+05 | 0.00E+00 | NA | NA       | NA | NA       |
| 2595 | 0.00E+00 | 1.44E+05 | NA | NA | NA       | NA       | NA | NA       | NA | NA       |
| 2596 | NA       | NA       | NA | NA | 1.44E+05 | 0.00E+00 | NA | NA       | NA | NA       |
| 2597 | NA       | NA       | NA | NA | 1.44E+05 | 0.00E+00 | NA | NA       | NA | NA       |
| 2598 | NA       | NA       | NA | NA | 0.00E+00 | 1.44E+05 | NA | NA       | NA | NA       |
| 2599 | NA       | NA       | NA | NA | 1.42E+05 | 0.00E+00 | NA | NA       | NA | NA       |
| 2600 | NA       | NA       | NA | NA | 1.41E+05 | 0.00E+00 | NA | NA       | NA | NA       |
| 2601 | 2.25E+05 | 0.00E+00 | NA | NA | 0.00E+00 | 1.41E+05 | NA | Inf      | NA | 0.00E+00 |
| 2602 | 0.00E+00 | 0.00E+00 | NA | NA | 7.36E+04 | 6.64E+04 | NA | 0.00E+00 | NA | 0.00E+00 |
| 2603 | NA       | NA       | NA | NA | 1.39E+05 | 0.00E+00 | NA | NA       | NA | NA       |
| 2604 | NA       | NA       | NA | NA | 0.00E+00 | 1.39E+05 | NA | NA       | NA | NA       |
| 2605 | NA       | NA       | NA | NA | 1.38E+05 | 0.00E+00 | NA | NA       | NA | NA       |
| 2606 | 1.01E+07 | 0.00E+00 | NA | NA | 0.00E+00 | 1.36E+05 | NA | Inf      | NA | 0.00E+00 |
| 2607 | NA       | NA       | NA | NA | 1.34E+05 | 0.00E+00 | NA | NA       | NA | NA       |
| 2608 | NA       | NA       | NA | NA | 1.32E+05 | 0.00E+00 | NA | NA       | NA | NA       |
| 2609 | NA       | NA       | NA | NA | 0.00E+00 | 1.30E+05 | NA | NA       | NA | NA       |
| 2610 | NA       | NA       | NA | NA | 1.28E+05 | 0.00E+00 | NA | NA       | NA | NA       |
| 2611 | 3.36E+05 | 0.00E+00 | NA | NA | 1.28E+05 | 0.00E+00 | NA | 2.62E+00 | NA | NA       |
| 2612 | NA       | NA       | NA | NA | 0.00E+00 | 1.28E+05 | NA | NA       | NA | NA       |
| 2613 | NA       | NA       | NA | NA | 5.36E+04 | 7.31E+04 | NA | NA       | NA | NA       |
| 2614 | 4.38E+06 | 0.00E+00 | NA | NA | 0.00E+00 | 1.23E+05 | NA | Inf      | NA | 0.00E+00 |
| 2615 | NA       | NA       | NA | NA | 0.00E+00 | 1.22E+05 | NA | NA       | NA | NA       |
| 2616 | NA       | NA       | NA | NA | 0.00E+00 | 1.20E+05 | NA | NA       | NA | NA       |
| 2617 | NA       | NA       | NA | NA | 0.00E+00 | 1.16E+05 | NA | NA       | NA | NA       |
| 2618 | 0.00E+00 | 6.66E+06 | NA | NA | 1.15E+05 | 0.00E+00 | NA | 0.00E+00 | NA | Inf      |

|      |          |          |    |    |          |          |    |          |    |          |
|------|----------|----------|----|----|----------|----------|----|----------|----|----------|
| 2619 | NA       | NA       | NA | NA | 1.14E+05 | 0.00E+00 | NA | NA       | NA | NA       |
| 2620 | NA       | NA       | NA | NA | 0.00E+00 | 1.14E+05 | NA | NA       | NA | NA       |
| 2621 | NA       | NA       | NA | NA | 0.00E+00 | 1.11E+05 | NA | NA       | NA | NA       |
| 2622 | 2.11E+06 | 0.00E+00 | NA | NA | 0.00E+00 | 1.09E+05 | NA | Inf      | NA | 0.00E+00 |
| 2623 | NA       | NA       | NA | NA | 0.00E+00 | 1.09E+05 | NA | NA       | NA | NA       |
| 2624 | NA       | NA       | NA | NA | 1.09E+05 | 0.00E+00 | NA | NA       | NA | NA       |
| 2625 | NA       | NA       | NA | NA | 1.08E+05 | 0.00E+00 | NA | NA       | NA | NA       |
| 2626 | NA       | NA       | NA | NA | 0.00E+00 | 1.08E+05 | NA | NA       | NA | NA       |
| 2627 | 0.00E+00 | 1.59E+07 | NA | NA | 0.00E+00 | 1.07E+05 | NA | NA       | NA | 1.49E+02 |
| 2628 | NA       | NA       | NA | NA | 1.07E+05 | 0.00E+00 | NA | NA       | NA | NA       |
| 2629 | NA       | NA       | NA | NA | 1.01E+05 | 0.00E+00 | NA | NA       | NA | NA       |
| 2630 | 0.00E+00 | 9.97E+04 | NA | NA | NA       | NA       | NA | NA       | NA | NA       |
| 2631 | NA       | NA       | NA | NA | 0.00E+00 | 9.83E+04 | NA | NA       | NA | NA       |
| 2632 | NA       | NA       | NA | NA | 9.64E+04 | 0.00E+00 | NA | NA       | NA | NA       |
| 2633 | NA       | NA       | NA | NA | 0.00E+00 | 9.44E+04 | NA | NA       | NA | NA       |
| 2634 | NA       | NA       | NA | NA | 0.00E+00 | 9.27E+04 | NA | NA       | NA | NA       |
| 2635 | NA       | NA       | NA | NA | 9.23E+04 | 0.00E+00 | NA | NA       | NA | NA       |
| 2636 | 0.00E+00 | 2.19E+06 | NA | NA | 9.06E+04 | 0.00E+00 | NA | 0.00E+00 | NA | Inf      |
| 2637 | NA       | NA       | NA | NA | 0.00E+00 | 8.87E+04 | NA | NA       | NA | NA       |
| 2638 | 0.00E+00 | 0.00E+00 | NA | NA | 0.00E+00 | 8.85E+04 | NA | NA       | NA | 0.00E+00 |
| 2639 | NA       | NA       | NA | NA | 8.84E+04 | 0.00E+00 | NA | NA       | NA | NA       |
| 2640 | NA       | NA       | NA | NA | 0.00E+00 | 8.84E+04 | NA | NA       | NA | NA       |
| 2641 | NA       | NA       | NA | NA | 8.83E+04 | 0.00E+00 | NA | NA       | NA | NA       |
| 2642 | NA       | NA       | NA | NA | 8.64E+04 | 0.00E+00 | NA | NA       | NA | NA       |
| 2643 | 0.00E+00 | 5.83E+06 | NA | NA | 8.60E+04 | 0.00E+00 | NA | 0.00E+00 | NA | Inf      |
| 2644 | 6.91E+05 | 0.00E+00 | NA | NA | 0.00E+00 | 8.47E+04 | NA | Inf      | NA | 0.00E+00 |
| 2645 | NA       | NA       | NA | NA | 0.00E+00 | 8.25E+04 | NA | NA       | NA | NA       |
| 2646 | NA       | NA       | NA | NA | 0.00E+00 | 8.11E+04 | NA | NA       | NA | NA       |
| 2647 | NA       | NA       | NA | NA | 0.00E+00 | 8.10E+04 | NA | NA       | NA | NA       |
| 2648 | NA       | NA       | NA | NA | 0.00E+00 | 8.07E+04 | NA | NA       | NA | NA       |
| 2649 | NA       | NA       | NA | NA | 7.93E+04 | 0.00E+00 | NA | NA       | NA | NA       |
| 2650 | NA       | NA       | NA | NA | 0.00E+00 | 7.89E+04 | NA | NA       | NA | NA       |
| 2651 | NA       | NA       | NA | NA | 0.00E+00 | 7.77E+04 | NA | NA       | NA | NA       |
| 2652 | NA       | NA       | NA | NA | 0.00E+00 | 7.61E+04 | NA | NA       | NA | NA       |
| 2653 | NA       | NA       | NA | NA | 0.00E+00 | 7.53E+04 | NA | NA       | NA | NA       |
| 2654 | 0.00E+00 | 0.00E+00 | NA | NA | 0.00E+00 | 7.40E+04 | NA | NA       | NA | 0.00E+00 |
| 2655 | NA       | NA       | NA | NA | 7.39E+04 | 0.00E+00 | NA | NA       | NA | NA       |
| 2656 | NA       | NA       | NA | NA | 7.31E+04 | 0.00E+00 | NA | NA       | NA | NA       |

|      |          |          |    |    |          |          |    |          |    |          |
|------|----------|----------|----|----|----------|----------|----|----------|----|----------|
| 2657 | NA       | NA       | NA | NA | 0.00E+00 | 7.16E+04 | NA | NA       | NA | NA       |
| 2658 | 0.00E+00 | 1.57E+06 | NA | NA | 7.07E+04 | 0.00E+00 | NA | 0.00E+00 | NA | Inf      |
| 2659 | NA       | NA       | NA | NA | 7.03E+04 | 0.00E+00 | NA | NA       | NA | NA       |
| 2660 | NA       | NA       | NA | NA | 0.00E+00 | 6.99E+04 | NA | NA       | NA | NA       |
| 2661 | 1.46E+06 | 0.00E+00 | NA | NA | 0.00E+00 | 6.95E+04 | NA | Inf      | NA | 0.00E+00 |
| 2662 | 1.24E+06 | 7.08E+06 | NA | NA | 0.00E+00 | 6.93E+04 | NA | Inf      | NA | 1.02E+02 |
| 2663 | NA       | NA       | NA | NA | 0.00E+00 | 6.90E+04 | NA | NA       | NA | NA       |
| 2664 | NA       | NA       | NA | NA | 6.87E+04 | 0.00E+00 | NA | NA       | NA | NA       |
| 2665 | NA       | NA       | NA | NA | 0.00E+00 | 6.81E+04 | NA | NA       | NA | NA       |
| 2666 | NA       | NA       | NA | NA | 0.00E+00 | 6.69E+04 | NA | NA       | NA | NA       |
| 2667 | NA       | NA       | NA | NA | 0.00E+00 | 6.59E+04 | NA | NA       | NA | NA       |
| 2668 | NA       | NA       | NA | NA | 0.00E+00 | 6.56E+04 | NA | NA       | NA | NA       |
| 2669 | NA       | NA       | NA | NA | 0.00E+00 | 6.51E+04 | NA | NA       | NA | NA       |
| 2670 | NA       | NA       | NA | NA | 6.27E+04 | 0.00E+00 | NA | NA       | NA | NA       |
| 2671 | NA       | NA       | NA | NA | 6.21E+04 | 0.00E+00 | NA | NA       | NA | NA       |
| 2672 | NA       | NA       | NA | NA | 0.00E+00 | 6.16E+04 | NA | NA       | NA | NA       |
| 2673 | NA       | NA       | NA | NA | 0.00E+00 | 6.11E+04 | NA | NA       | NA | NA       |
| 2674 | NA       | NA       | NA | NA | 6.08E+04 | 0.00E+00 | NA | NA       | NA | NA       |
| 2675 | 0.00E+00 | 2.54E+06 | NA | NA | 6.06E+04 | 0.00E+00 | NA | 0.00E+00 | NA | Inf      |
| 2676 | NA       | NA       | NA | NA | 0.00E+00 | 6.02E+04 | NA | NA       | NA | NA       |
| 2677 | NA       | NA       | NA | NA | 0.00E+00 | 5.88E+04 | NA | NA       | NA | NA       |
| 2678 | NA       | NA       | NA | NA | 5.87E+04 | 0.00E+00 | NA | NA       | NA | NA       |
| 2679 | 3.11E+05 | 2.24E+06 | NA | NA | 0.00E+00 | 5.85E+04 | NA | Inf      | NA | 3.84E+01 |
| 2680 | NA       | NA       | NA | NA | 0.00E+00 | 5.81E+04 | NA | NA       | NA | NA       |
| 2681 | NA       | NA       | NA | NA | 0.00E+00 | 5.70E+04 | NA | NA       | NA | NA       |
| 2682 | 0.00E+00 | 7.03E+06 | NA | NA | 0.00E+00 | 5.66E+04 | NA | NA       | NA | 1.24E+02 |
| 2683 | NA       | NA       | NA | NA | 0.00E+00 | 5.64E+04 | NA | NA       | NA | NA       |
| 2684 | 3.52E+05 | 0.00E+00 | NA | NA | 0.00E+00 | 5.61E+04 | NA | Inf      | NA | 0.00E+00 |
| 2685 | 4.25E+05 | 7.40E+07 | NA | NA | 5.40E+04 | 0.00E+00 | NA | 7.86E+00 | NA | Inf      |
| 2686 | 3.19E+06 | 0.00E+00 | NA | NA | 0.00E+00 | 5.40E+04 | NA | Inf      | NA | 0.00E+00 |
| 2687 | NA       | NA       | NA | NA | 0.00E+00 | 5.30E+04 | NA | NA       | NA | NA       |
| 2688 | NA       | NA       | NA | NA | 0.00E+00 | 5.20E+04 | NA | NA       | NA | NA       |
| 2689 | NA       | NA       | NA | NA | 5.10E+04 | 0.00E+00 | NA | NA       | NA | NA       |
| 2690 | NA       | NA       | NA | NA | 0.00E+00 | 4.90E+04 | NA | NA       | NA | NA       |
| 2691 | NA       | NA       | NA | NA | 4.82E+04 | 0.00E+00 | NA | NA       | NA | NA       |
| 2692 | 4.80E+04 | 0.00E+00 | NA | NA | NA       | NA       | NA | NA       | NA | NA       |
| 2693 | 2.08E+06 | 0.00E+00 | NA | NA | 0.00E+00 | 4.78E+04 | NA | Inf      | NA | 0.00E+00 |
| 2694 | 1.38E+06 | 0.00E+00 | NA | NA | 0.00E+00 | 4.76E+04 | NA | Inf      | NA | 0.00E+00 |

|      |          |          |    |    |          |          |    |          |    |          |
|------|----------|----------|----|----|----------|----------|----|----------|----|----------|
| 2695 | 1.02E+06 | 2.67E+07 | NA | NA | 0.00E+00 | 4.66E+04 | NA | Inf      | NA | 5.73E+02 |
| 2696 | NA       | NA       | NA | NA | 4.55E+04 | 0.00E+00 | NA | NA       | NA | NA       |
| 2697 | NA       | NA       | NA | NA | 0.00E+00 | 4.54E+04 | NA | NA       | NA | NA       |
| 2698 | 1.57E+06 | 0.00E+00 | NA | NA | 0.00E+00 | 4.52E+04 | NA | Inf      | NA | 0.00E+00 |
| 2699 | NA       | NA       | NA | NA | 4.51E+04 | 0.00E+00 | NA | NA       | NA | NA       |
| 2700 | 0.00E+00 | 5.06E+05 | NA | NA | 0.00E+00 | 4.50E+04 | NA | NA       | NA | 1.12E+01 |
| 2701 | NA       | NA       | NA | NA | 4.08E+04 | 0.00E+00 | NA | NA       | NA | NA       |
| 2702 | 1.23E+06 | 0.00E+00 | NA | NA | 0.00E+00 | 4.04E+04 | NA | Inf      | NA | 0.00E+00 |
| 2703 | NA       | NA       | NA | NA | 0.00E+00 | 3.85E+04 | NA | NA       | NA | NA       |
| 2704 | NA       | NA       | NA | NA | 0.00E+00 | 3.46E+04 | NA | NA       | NA | NA       |
| 2705 | NA       | NA       | NA | NA | 0.00E+00 | 2.96E+04 | NA | NA       | NA | NA       |
| 2706 | NA       | NA       | NA | NA | 0.00E+00 | 2.82E+04 | NA | NA       | NA | NA       |
| 2707 | NA       | NA       | NA | NA | 0.00E+00 | 2.68E+04 | NA | NA       | NA | NA       |
| 2708 | 4.40E+05 | 0.00E+00 | NA | NA | 2.55E+04 | 0.00E+00 | NA | 1.72E+01 | NA | NA       |
| 2709 | 4.08E+05 | 7.89E+07 | NA | NA | 0.00E+00 | 0.00E+00 | NA | Inf      | NA | Inf      |
| 2710 | 2.44E+05 | 2.53E+07 | NA | NA | NA       | NA       | NA | NA       | NA | NA       |
| 2711 | 4.44E+05 | 4.52E+07 | NA | NA | 0.00E+00 | 0.00E+00 | NA | Inf      | NA | Inf      |
| 2712 | 3.56E+05 | 1.49E+07 | NA | NA | 0.00E+00 | 0.00E+00 | NA | Inf      | NA | Inf      |
| 2713 | 6.60E+05 | 2.47E+06 | NA | NA | 0.00E+00 | 0.00E+00 | NA | Inf      | NA | Inf      |
| 2714 | 5.74E+05 | 1.78E+06 | NA | NA | NA       | NA       | NA | NA       | NA | NA       |
| 2715 | 4.74E+05 | 1.34E+06 | NA | NA | 0.00E+00 | 0.00E+00 | NA | Inf      | NA | Inf      |
| 2716 | 2.74E+06 | 7.13E+06 | NA | NA | 0.00E+00 | 0.00E+00 | NA | Inf      | NA | Inf      |
| 2717 | 1.79E+06 | 3.46E+06 | NA | NA | NA       | NA       | NA | NA       | NA | NA       |
| 2718 | 2.18E+06 | 4.07E+06 | NA | NA | NA       | NA       | NA | NA       | NA | NA       |
| 2719 | 2.85E+05 | 3.16E+05 | NA | NA | NA       | NA       | NA | NA       | NA | NA       |
| 2720 | 4.92E+06 | 5.34E+06 | NA | NA | 0.00E+00 | 0.00E+00 | NA | Inf      | NA | Inf      |
| 2721 | 1.47E+06 | 7.54E+05 | NA | NA | 0.00E+00 | 0.00E+00 | NA | Inf      | NA | Inf      |
| 2722 | 1.61E+07 | 8.23E+06 | NA | NA | NA       | NA       | NA | NA       | NA | NA       |
| 2723 | 1.15E+07 | 3.48E+05 | NA | NA | NA       | NA       | NA | NA       | NA | NA       |



| Fold Changes |            |             |               |             |             |                    |                  |                   |                  |
|--------------|------------|-------------|---------------|-------------|-------------|--------------------|------------------|-------------------|------------------|
| Row          | Wash02GRvs | Wash02PCFTv | ElutePCFTvsEl | Wash01PCFTv | Wash02PCFTv | EluteGRvsWash01G   | EluteGRvsWash02G | ElutePCFTvsWash0  | ElutePCFTvsWash0 |
| Number       | Wash01GR   | sWash01PCFT | uteGR         | sWash01GR   | sWash02GR   | Rbins              | Rbins            | 1PCFTbins         | 2PCFTbins        |
| 1            | 5.63E-03   | 6.62E-03    | 1.22E+00      | 9.68E-01    | 1.14E+00    | (4.25e-05,0.00294] | (0,0.101]        | (0.000255,0.0184] | (0,0.192]        |
| 2            | 5.65E-03   | 6.64E-03    | NA            | 9.69E-01    | 1.14E+00    | NA                 | NA               | NA                | NA               |
| 3            | 2.83E-02   | 3.28E-02    | 3.01E+00      | 1.18E+00    | 1.37E+00    | (0.00294,0.0348]   | (0.101,1.34]     | (0.0184,Inf]      | (0.192,21]       |
| 4            | 2.56E-03   | 1.88E-03    | 3.89E-01      | 1.00E+00    | 7.34E-01    | (4.25e-05,0.00294] | (0,0.101]        | (0,0.000255]      | (0,0.192]        |
| 5            | 3.46E-03   | 2.98E-03    | 1.37E-01      | 1.01E+00    | 8.70E-01    | (4.25e-05,0.00294] | (0,0.101]        | (0,0.000255]      | (0,0.192]        |
| 6            | 1.47E-03   | 1.71E-03    | 5.35E-02      | 1.16E+00    | 1.35E+00    | (4.25e-05,0.00294] | (0.101,1.34]     | (0,0.000255]      | (0,0.192]        |
| 7            | 5.50E-03   | 4.02E-03    | 1.21E+00      | 1.06E+00    | 7.73E-01    | (4.25e-05,0.00294] | (0.101,1.34]     | (0.000255,0.0184] | (0.192,21]       |
| 8            | 9.55E-03   | 1.27E-02    | 1.37E+00      | 1.12E+00    | 1.49E+00    | (4.25e-05,0.00294] | (0.101,1.34]     | (0.000255,0.0184] | (0.192,21]       |
| 9            | 1.06E-02   | 1.53E-02    | 2.73E-01      | 1.30E+00    | 1.86E+00    | (0.00294,0.0348]   | (0.101,1.34]     | (0.000255,0.0184] | (0,0.192]        |
| 10           | 1.05E-03   | 1.48E-03    | 1.14E+00      | 9.08E-01    | 1.28E+00    | (4.25e-05,0.00294] | (0.101,1.34]     | (0,0.000255]      | (0,0.192]        |
| 11           | 2.03E-03   | 2.47E-03    | 2.97E+00      | 8.98E-01    | 1.10E+00    | (4.25e-05,0.00294] | (0,0.101]        | (0.000255,0.0184] | (0,0.192]        |
| 12           | 8.55E-03   | 7.31E-03    | 1.28E+00      | 1.10E+00    | 9.36E-01    | (4.25e-05,0.00294] | (0,0.101]        | (0.000255,0.0184] | (0,0.192]        |
| 13           | 2.52E-03   | 2.45E-03    | 1.20E-01      | 9.99E-01    | 9.73E-01    | (4.25e-05,0.00294] | (0.101,1.34]     | (0,0.000255]      | (0,0.192]        |
| 14           | 2.64E-03   | 3.19E-03    | 2.84E+00      | 9.77E-01    | 1.18E+00    | (4.25e-05,0.00294] | (0,0.101]        | (0.000255,0.0184] | (0.192,21]       |
| 15           | 3.43E-03   | 2.44E-03    | 3.79E-01      | 9.97E-01    | 7.10E-01    | (4.25e-05,0.00294] | (0,0.101]        | (0,0.000255]      | (0,0.192]        |
| 16           | 3.64E-03   | 2.11E-03    | NA            | 9.62E-01    | 5.57E-01    | NA                 | NA               | NA                | NA               |
| 17           | 2.88E-03   | 3.35E-03    | 7.86E-01      | 1.00E+00    | 1.16E+00    | (4.25e-05,0.00294] | (0.101,1.34]     | (0.000255,0.0184] | (0.192,21]       |
| 18           | 6.34E-03   | 4.28E-03    | 1.65E-01      | 1.07E+00    | 7.23E-01    | (4.25e-05,0.00294] | (0.101,1.34]     | (0,0.000255]      | (0,0.192]        |
| 19           | 2.58E-03   | 2.42E-03    | 1.20E-01      | 9.82E-01    | 9.19E-01    | (4.25e-05,0.00294] | (0.101,1.34]     | (0,0.000255]      | (0,0.192]        |
| 20           | 1.08E-03   | 1.40E-03    | 3.39E-01      | 1.02E+00    | 1.32E+00    | (0,4.25e-05]       | (0,0.101]        | (0,0.000255]      | (0,0.192]        |
| 21           | 6.75E-04   | 6.51E-04    | 1.54E+00      | 1.11E+00    | 1.08E+00    | (0,4.25e-05]       | (0,0.101]        | (0,0.000255]      | (0,0.192]        |
| 22           | 1.21E-03   | 1.61E-03    | 2.81E-02      | 9.98E-01    | 1.33E+00    | (4.25e-05,0.00294] | (1.34,14.9]      | (0,0.000255]      | (0,0.192]        |
| 23           | 6.39E-04   | 1.14E-03    | NA            | 9.93E-01    | 1.77E+00    | NA                 | NA               | NA                | NA               |
| 24           | 2.37E-03   | 2.94E-03    | Inf           | 1.15E+00    | 1.42E+00    | NA                 | NA               | (0,0.000255]      | (0,0.192]        |
| 25           | 2.27E-03   | 2.43E-03    | 1.95E-01      | 1.15E+00    | 1.23E+00    | (4.25e-05,0.00294] | (0,0.101]        | (0,0.000255]      | (0,0.192]        |
| 26           | 2.07E-02   | 7.58E-03    | NA            | 2.08E+00    | 7.60E-01    | NA                 | NA               | NA                | NA               |
| 27           | 1.32E-03   | 1.59E-03    | 1.73E-01      | 1.09E+00    | 1.30E+00    | (4.25e-05,0.00294] | (0.101,1.34]     | (0,0.000255]      | (0,0.192]        |
| 28           | 3.70E-03   | 3.65E-03    | NA            | 9.96E-01    | 9.83E-01    | NA                 | NA               | NA                | NA               |
| 29           | 3.92E-03   | 3.86E-03    | NA            | 1.07E+00    | 1.06E+00    | NA                 | NA               | NA                | NA               |
| 30           | 2.84E-03   | 2.71E-03    | 2.39E+00      | 9.38E-01    | 8.95E-01    | (0,4.25e-05]       | (0,0.101]        | (0,0.000255]      | (0,0.192]        |
| 31           | 1.73E-03   | 1.65E-03    | 6.27E-01      | 1.04E+00    | 9.91E-01    | (4.25e-05,0.00294] | (0.101,1.34]     | (0,0.000255]      | (0,0.192]        |
| 32           | 4.45E-03   | 2.55E-03    | 8.84E-02      | 1.38E+00    | 7.89E-01    | (4.25e-05,0.00294] | (0.101,1.34]     | (0,0.000255]      | (0,0.192]        |
| 33           | 4.20E-03   | 2.80E-03    | NA            | 1.08E+00    | 7.17E-01    | NA                 | NA               | NA                | NA               |
| 34           | 6.17E-02   | 6.06E-02    | 3.26E-01      | 1.21E+00    | 1.19E+00    | (0.00294,0.0348]   | (0.101,1.34]     | (0.000255,0.0184] | (0,0.192]        |

|    |          |          |          |          |          |                    |              |                   |            |
|----|----------|----------|----------|----------|----------|--------------------|--------------|-------------------|------------|
| 35 | 3.00E-03 | 3.95E-03 | 1.38E+00 | 1.07E+00 | 1.41E+00 | (0,4.25e-05]       | (0,0.101]    | (0,0.000255]      | (0,0.192]  |
| 36 | 3.59E-03 | 4.53E-03 | 4.26E-01 | 9.60E-01 | 1.21E+00 | (4.25e-05,0.00294] | (0.101,1.34] | (0.000255,0.0184] | (0,0.192]  |
| 37 | 3.07E-03 | 2.14E-03 | 3.75E-01 | 1.06E+00 | 7.41E-01 | (4.25e-05,0.00294] | (0.101,1.34] | (0.000255,0.0184] | (0,0.192]  |
| 38 | 2.45E-03 | 3.65E-03 | 4.04E+00 | 1.02E+00 | 1.52E+00 | (0,4.25e-05]       | (0,0.101]    | (0,0.000255]      | (0,0.192]  |
| 39 | 1.68E-03 | 1.90E-03 | NA       | 1.14E+00 | 1.28E+00 | NA                 | NA           | NA                | NA         |
| 40 | 3.65E-03 | 2.22E-03 | 1.84E+00 | 9.81E-01 | 5.96E-01 | (4.25e-05,0.00294] | (0,0.101]    | (0.000255,0.0184] | (0.192,21] |
| 41 | 1.28E-03 | 1.54E-03 | NA       | 9.73E-01 | 1.16E+00 | NA                 | NA           | NA                | NA         |
| 42 | 1.14E-03 | 1.35E-03 | 0.00E+00 | 1.07E+00 | 1.26E+00 | (4.25e-05,0.00294] | (0.101,1.34] | NA                | NA         |
| 43 | 3.44E-03 | 4.57E-03 | NA       | 1.07E+00 | 1.42E+00 | NA                 | NA           | NA                | NA         |
| 44 | 1.87E-03 | 2.44E-03 | NA       | 1.11E+00 | 1.45E+00 | NA                 | NA           | NA                | NA         |
| 45 | 2.58E-02 | 2.40E-02 | 5.25E-01 | 1.16E+00 | 1.08E+00 | (0.00294,0.0348]   | (0.101,1.34] | (0.000255,0.0184] | (0,0.192]  |
| 46 | 3.52E-03 | 4.99E-03 | 9.79E+00 | 1.04E+00 | 1.48E+00 | (0,4.25e-05]       | (0,0.101]    | (0,0.000255]      | (0,0.192]  |
| 47 | 6.01E-04 | 7.35E-04 | NA       | 1.09E+00 | 1.34E+00 | NA                 | NA           | NA                | NA         |
| 48 | 1.37E-03 | 1.32E-03 | 1.79E-01 | 1.06E+00 | 1.02E+00 | (4.25e-05,0.00294] | (0.101,1.34] | (0,0.000255]      | (0,0.192]  |
| 49 | 1.15E-03 | 1.32E-03 | 4.60E-01 | 1.09E+00 | 1.25E+00 | (4.25e-05,0.00294] | (0.101,1.34] | (0,0.000255]      | (0,0.192]  |
| 50 | 1.24E-02 | 1.22E-02 | 1.59E+00 | 1.20E+00 | 1.18E+00 | (4.25e-05,0.00294] | (0,0.101]    | (0.000255,0.0184] | (0,0.192]  |
| 51 | 4.15E-03 | 3.57E-03 | NA       | 1.04E+00 | 8.91E-01 | NA                 | NA           | NA                | NA         |
| 52 | 3.57E-03 | 1.51E-03 | 3.93E-01 | 1.16E+00 | 4.90E-01 | (4.25e-05,0.00294] | (0.101,1.34] | (0,0.000255]      | (0,0.192]  |
| 53 | 2.39E-03 | 2.83E-03 | NA       | 1.02E+00 | 1.21E+00 | NA                 | NA           | NA                | NA         |
| 54 | 1.67E-03 | 1.40E-03 | NA       | 9.52E-01 | 8.01E-01 | NA                 | NA           | NA                | NA         |
| 55 | 7.12E-04 | 1.69E-03 | NA       | 9.02E-01 | 2.14E+00 | NA                 | NA           | NA                | NA         |
| 56 | 6.40E-03 | 3.61E-03 | NA       | 1.17E+00 | 6.61E-01 | NA                 | NA           | NA                | NA         |
| 57 | 5.59E-03 | 4.67E-03 | 4.33E-02 | 1.24E+00 | 1.04E+00 | (4.25e-05,0.00294] | (0.101,1.34] | (0,0.000255]      | (0,0.192]  |
| 58 | 5.59E-03 | 4.67E-03 | 4.33E-02 | 1.24E+00 | 1.04E+00 | (4.25e-05,0.00294] | (0.101,1.34] | (0,0.000255]      | (0,0.192]  |
| 59 | 4.43E-03 | 5.16E-03 | NA       | 1.28E+00 | 1.49E+00 | NA                 | NA           | NA                | NA         |
| 60 | 4.36E-04 | 2.39E-03 | 3.09E-01 | 1.04E+00 | 5.72E+00 | (0.00294,0.0348]   | (14.9,Inf]   | (0.000255,0.0184] | (0.192,21] |
| 61 | 3.22E-03 | 3.17E-03 | NA       | 1.04E+00 | 1.02E+00 | NA                 | NA           | NA                | NA         |
| 62 | 3.20E-03 | 5.58E-03 | NA       | 1.04E+00 | 1.82E+00 | NA                 | NA           | NA                | NA         |
| 63 | 2.90E-03 | 4.30E-03 | NA       | 9.71E-01 | 1.44E+00 | NA                 | NA           | NA                | NA         |
| 64 | 5.41E-03 | 5.55E-03 | NA       | 8.84E-01 | 9.07E-01 | NA                 | NA           | NA                | NA         |
| 65 | 3.26E-03 | 2.09E-03 | 2.62E+00 | 1.03E+00 | 6.61E-01 | (0.00294,0.0348]   | (1.34,14.9]  | (0.000255,0.0184] | (0.192,21] |
| 66 | 1.66E-03 | 1.73E-02 | 4.26E+00 | 8.92E-01 | 9.27E+00 | (0.0348,Inf]       | (14.9,Inf]   | (0.0184,Inf]      | (21,Inf]   |
| 67 | 1.75E-03 | 1.60E-03 | Inf      | 1.07E+00 | 9.76E-01 | NA                 | NA           | (0,0.000255]      | (0,0.192]  |
| 68 | 3.30E-03 | 2.90E-03 | 1.25E-01 | 1.03E+00 | 9.03E-01 | (4.25e-05,0.00294] | (0.101,1.34] | (0,0.000255]      | (0,0.192]  |
| 69 | NA       | NA       | NA       | 1.21E+00 | NA       | NA                 | NA           | NA                | NA         |
| 70 | 8.09E-03 | 8.82E-03 | 2.34E-01 | 8.61E-01 | 9.38E-01 | (0.0348,Inf]       | (1.34,14.9]  | (0.000255,0.0184] | (0.192,21] |
| 71 | 1.59E-03 | 2.60E-03 | Inf      | 9.88E-01 | 1.61E+00 | NA                 | NA           | (0,0.000255]      | (0,0.192]  |
| 72 | 3.78E-03 | 4.08E-03 | Inf      | 1.25E+00 | 1.35E+00 | NA                 | NA           | (0,0.000255]      | (0,0.192]  |

|     |          |          |          |          |          |                    |              |                   |            |
|-----|----------|----------|----------|----------|----------|--------------------|--------------|-------------------|------------|
| 73  | 3.30E-03 | 4.88E-03 | NA       | 9.27E-01 | 1.37E+00 | NA                 | NA           | NA                | NA         |
| 74  | 1.33E-03 | 3.69E-03 | 2.13E+01 | 9.22E-01 | 2.55E+00 | (0,4.25e-05]       | (0,0.101]    | (0.000255,0.0184] | (0.192,21] |
| 75  | 2.61E-03 | 4.71E-03 | 0.00E+00 | 1.05E+00 | 1.89E+00 | (0,4.25e-05]       | (0,0.101]    | NA                | NA         |
| 76  | 2.66E-03 | 3.48E-03 | NA       | 9.53E-01 | 1.25E+00 | NA                 | NA           | NA                | NA         |
| 77  | 1.94E-03 | 2.13E-03 | NA       | 1.11E+00 | 1.22E+00 | NA                 | NA           | NA                | NA         |
| 78  | 1.45E-03 | 1.53E-03 | 4.74E-01 | 1.07E+00 | 1.14E+00 | (4.25e-05,0.00294] | (0.101,1.34] | (0.000255,0.0184] | (0,0.192]  |
| 79  | 3.57E-03 | 3.92E-03 | Inf      | 1.07E+00 | 1.18E+00 | NA                 | NA           | (0,0.000255]      | (0,0.192]  |
| 80  | 2.47E-03 | 3.10E-03 | 1.09E+00 | 1.09E+00 | 1.36E+00 | (4.25e-05,0.00294] | (0.101,1.34] | (0.000255,0.0184] | (0,0.192]  |
| 81  | 3.97E-03 | 1.73E-02 | 4.41E-01 | 1.01E+00 | 4.38E+00 | (0.0348,Inf]       | (14.9,Inf]   | (0.0184,Inf]      | (0.192,21] |
| 82  | 1.85E-03 | 2.45E-03 | 6.49E-01 | 1.12E+00 | 1.48E+00 | (0.00294,0.0348]   | (1.34,14.9]  | (0.000255,0.0184] | (0.192,21] |
| 83  | 4.47E-03 | 5.12E-03 | Inf      | 1.01E+00 | 1.16E+00 | NA                 | NA           | (0.000255,0.0184] | (0,0.192]  |
| 84  | 2.79E-03 | 2.50E-03 | 6.21E-01 | 1.11E+00 | 9.97E-01 | (4.25e-05,0.00294] | (0.101,1.34] | (0.000255,0.0184] | (0,0.192]  |
| 85  | 4.03E-03 | 5.86E-03 | NA       | 1.11E+00 | 1.61E+00 | NA                 | NA           | NA                | NA         |
| 86  | 3.30E-03 | 3.41E-03 | NA       | 1.13E+00 | 1.17E+00 | NA                 | NA           | NA                | NA         |
| 87  | 2.26E-03 | 2.03E-03 | NA       | 1.20E+00 | 1.08E+00 | NA                 | NA           | NA                | NA         |
| 88  | 2.21E-03 | 2.23E-03 | 9.64E-01 | 1.30E+00 | 1.31E+00 | (4.25e-05,0.00294] | (0.101,1.34] | (0.000255,0.0184] | (0.192,21] |
| 89  | 8.78E-04 | 1.07E-03 | 0.00E+00 | 9.84E-01 | 1.20E+00 | (4.25e-05,0.00294] | (0.101,1.34] | NA                | NA         |
| 90  | 3.40E-03 | 5.89E-03 | Inf      | 8.54E-01 | 1.48E+00 | NA                 | NA           | (0.000255,0.0184] | (0.192,21] |
| 91  | 1.03E-03 | 8.25E-04 | NA       | 9.88E-01 | 7.90E-01 | NA                 | NA           | NA                | NA         |
| 92  | 1.76E-03 | 9.79E-04 | NA       | 9.16E-01 | 5.11E-01 | NA                 | NA           | NA                | NA         |
| 93  | 4.46E-03 | 2.07E-03 | NA       | 9.28E-01 | 4.32E-01 | NA                 | NA           | NA                | NA         |
| 94  | 6.31E-03 | 6.25E-03 | 3.32E-01 | 1.04E+00 | 1.03E+00 | (4.25e-05,0.00294] | (0.101,1.34] | (0.000255,0.0184] | (0,0.192]  |
| 95  | 6.03E-04 | 5.49E-04 | NA       | 1.09E+00 | 9.93E-01 | NA                 | NA           | NA                | NA         |
| 96  | 1.09E-03 | 2.05E-03 | NA       | 8.80E-01 | 1.65E+00 | NA                 | NA           | NA                | NA         |
| 97  | 2.22E-03 | 3.88E-03 | NA       | 9.88E-01 | 1.73E+00 | NA                 | NA           | NA                | NA         |
| 98  | 1.96E-03 | 1.44E-03 | NA       | 9.88E-01 | 7.24E-01 | NA                 | NA           | NA                | NA         |
| 99  | 2.46E-03 | 2.23E-03 | Inf      | 9.96E-01 | 9.06E-01 | NA                 | NA           | (0,0.000255]      | (0,0.192]  |
| 100 | 1.22E-03 | 1.17E-03 | NA       | 9.06E-01 | 8.70E-01 | NA                 | NA           | NA                | NA         |
| 101 | 2.54E-03 | 1.58E-03 | NA       | 9.32E-01 | 5.80E-01 | NA                 | NA           | NA                | NA         |
| 102 | 2.47E-03 | 9.47E-04 | 1.83E-01 | 1.08E+00 | 4.13E-01 | (4.25e-05,0.00294] | (0.101,1.34] | (0.000255,0.0184] | (0.192,21] |
| 103 | 4.02E-03 | 1.75E-03 | NA       | 8.93E-01 | 3.89E-01 | NA                 | NA           | NA                | NA         |
| 104 | 1.09E-03 | 1.93E-03 | NA       | 9.84E-01 | 1.75E+00 | NA                 | NA           | NA                | NA         |
| 105 | 2.35E-03 | 1.98E-03 | NA       | 9.58E-01 | 8.07E-01 | NA                 | NA           | NA                | NA         |
| 106 | 4.68E-03 | 2.68E-03 | 0.00E+00 | 1.29E+00 | 7.36E-01 | (0.00294,0.0348]   | (1.34,14.9]  | NA                | NA         |
| 107 | 8.21E-04 | 6.77E-04 | 0.00E+00 | 6.93E-01 | 5.71E-01 | (0,4.25e-05]       | (0,0.101]    | NA                | NA         |
| 108 | 3.19E-03 | 3.12E-03 | 5.80E-01 | 8.91E-01 | 8.72E-01 | (4.25e-05,0.00294] | (0.101,1.34] | (0,0.000255]      | (0,0.192]  |
| 109 | 4.15E-03 | 9.00E-03 | NA       | 8.73E-01 | 1.89E+00 | NA                 | NA           | NA                | NA         |
| 110 | 1.65E-03 | 2.07E-03 | NA       | 1.05E+00 | 1.32E+00 | NA                 | NA           | NA                | NA         |

|     |          |          |          |          |          |                    |              |                   |            |
|-----|----------|----------|----------|----------|----------|--------------------|--------------|-------------------|------------|
| 111 | 3.86E-03 | 1.06E-03 | NA       | 1.13E+00 | 3.09E-01 | NA                 | NA           | NA                | NA         |
| 112 | 3.10E-03 | 1.23E-03 | 5.64E+00 | 9.87E-01 | 3.91E-01 | (4.25e-05,0.00294] | (0.101,1.34] | (0.000255,0.0184] | (0.192,21] |
| 113 | 3.85E-03 | 3.41E-03 | NA       | 1.34E+00 | 1.19E+00 | NA                 | NA           | NA                | NA         |
| 114 | 1.86E-03 | 2.06E-03 | 0.00E+00 | 9.74E-01 | 1.08E+00 | (4.25e-05,0.00294] | (0,0.101]    | NA                | NA         |
| 115 | 1.53E-03 | 2.31E-03 | NA       | 9.91E-01 | 1.50E+00 | NA                 | NA           | NA                | NA         |
| 116 | 1.99E-03 | 2.65E-03 | NA       | 9.85E-01 | 1.31E+00 | NA                 | NA           | NA                | NA         |
| 117 | 7.00E-04 | 1.54E-03 | 0.00E+00 | 1.01E+00 | 2.24E+00 | (0.00294,0.0348]   | (1.34,14.9]  | NA                | NA         |
| 118 | 3.93E-03 | 3.89E-03 | 7.84E-01 | 9.68E-01 | 9.60E-01 | (0.00294,0.0348]   | (0.101,1.34] | (0.000255,0.0184] | (0.192,21] |
| 119 | 1.51E-03 | 1.15E-03 | 0.00E+00 | 9.69E-01 | 7.37E-01 | (4.25e-05,0.00294] | (0,0.101]    | NA                | NA         |
| 120 | 2.43E-03 | 2.25E-03 | 0.00E+00 | 1.02E+00 | 9.48E-01 | (4.25e-05,0.00294] | (0,0.101]    | NA                | NA         |
| 121 | 7.35E-03 | 2.82E-03 | NA       | 1.03E+00 | 3.96E-01 | NA                 | NA           | NA                | NA         |
| 122 | 5.08E-03 | 6.53E-03 | Inf      | 1.23E+00 | 1.58E+00 | NA                 | NA           | (0,0.000255]      | (0,0.192]  |
| 123 | 4.63E-03 | 5.82E-03 | NA       | 1.03E+00 | 1.29E+00 | NA                 | NA           | NA                | NA         |
| 124 | 2.10E-03 | 2.62E-03 | 0.00E+00 | 8.39E-01 | 1.05E+00 | (4.25e-05,0.00294] | (0.101,1.34] | NA                | NA         |
| 125 | 2.32E-03 | 1.44E-03 | 2.77E+02 | 8.63E-01 | 5.36E-01 | (0,4.25e-05]       | (0,0.101]    | (0.000255,0.0184] | (0.192,21] |
| 126 | 2.28E-03 | 2.13E-03 | 0.00E+00 | 8.93E-01 | 8.35E-01 | (4.25e-05,0.00294] | (0,0.101]    | NA                | NA         |
| 127 | 3.38E-03 | 2.88E-03 | 0.00E+00 | 9.79E-01 | 8.34E-01 | (4.25e-05,0.00294] | (0.101,1.34] | NA                | NA         |
| 128 | 2.35E-03 | 1.58E-03 | 2.30E-02 | 1.11E+00 | 7.51E-01 | (0.00294,0.0348]   | (0.101,1.34] | (0,0.000255]      | (0,0.192]  |
| 129 | 2.35E-03 | 1.58E-03 | 2.30E-02 | 1.11E+00 | 7.51E-01 | (0.00294,0.0348]   | (0.101,1.34] | (0,0.000255]      | (0,0.192]  |
| 130 | 1.35E-03 | 1.79E-03 | NA       | 9.92E-01 | 1.32E+00 | NA                 | NA           | NA                | NA         |
| 131 | 4.27E-03 | 3.26E-03 | NA       | 1.21E+00 | 9.24E-01 | NA                 | NA           | NA                | NA         |
| 132 | 3.18E-03 | 3.15E-03 | NA       | 9.69E-01 | 9.61E-01 | NA                 | NA           | NA                | NA         |
| 133 | 3.64E-03 | 5.07E-03 | NA       | 9.33E-01 | 1.30E+00 | NA                 | NA           | NA                | NA         |
| 134 | 2.40E-03 | 2.33E-03 | NA       | 1.01E+00 | 9.82E-01 | NA                 | NA           | NA                | NA         |
| 135 | 1.38E-03 | 8.62E-04 | NA       | 1.31E+00 | 8.19E-01 | NA                 | NA           | NA                | NA         |
| 136 | 2.53E-03 | 2.20E-03 | NA       | 7.93E-01 | 6.90E-01 | NA                 | NA           | NA                | NA         |
| 137 | 2.05E-03 | 3.16E-03 | NA       | 1.10E+00 | 1.70E+00 | NA                 | NA           | NA                | NA         |
| 138 | 7.28E-03 | 4.19E-03 | NA       | 9.85E-01 | 5.67E-01 | NA                 | NA           | NA                | NA         |
| 139 | 4.71E-03 | 4.99E-03 | NA       | 1.10E+00 | 1.17E+00 | NA                 | NA           | NA                | NA         |
| 140 | 3.11E-03 | 3.90E-03 | Inf      | 1.00E+00 | 1.26E+00 | NA                 | NA           | (0,0.000255]      | (0,0.192]  |
| 141 | 1.70E-03 | 2.27E-03 | NA       | 9.16E-01 | 1.23E+00 | NA                 | NA           | NA                | NA         |
| 142 | 5.13E-03 | 4.22E-03 | Inf      | 1.27E+00 | 1.05E+00 | NA                 | NA           | (0.000255,0.0184] | (0.192,21] |
| 143 | 4.35E-03 | 8.84E-03 | NA       | 9.89E-01 | 2.01E+00 | NA                 | NA           | NA                | NA         |
| 144 | 2.69E-03 | 1.52E-03 | NA       | 1.05E+00 | 5.94E-01 | NA                 | NA           | NA                | NA         |
| 145 | 6.65E-03 | 3.48E-03 | NA       | 8.73E-01 | 4.57E-01 | NA                 | NA           | NA                | NA         |
| 146 | 1.23E-03 | 1.36E-03 | NA       | 8.91E-01 | 9.86E-01 | NA                 | NA           | NA                | NA         |
| 147 | 2.93E-03 | 2.22E-03 | Inf      | 1.13E+00 | 8.55E-01 | NA                 | NA           | (0.000255,0.0184] | (0.192,21] |
| 148 | 8.63E-04 | 1.41E-03 | 0.00E+00 | 9.41E-01 | 1.54E+00 | (4.25e-05,0.00294] | (1.34,14.9]  | NA                | NA         |

|     |          |          |          |          |          |                    |              |                   |            |
|-----|----------|----------|----------|----------|----------|--------------------|--------------|-------------------|------------|
| 149 | 2.01E-03 | 1.58E-03 | 3.56E-02 | 9.95E-01 | 7.81E-01 | (0.00294,0.0348]   | (1.34,14.9]  | (0,0.000255]      | (0,0.192]  |
| 150 | 2.89E-03 | 2.30E-03 | 0.00E+00 | 1.04E+00 | 8.30E-01 | (4.25e-05,0.00294] | (0.101,1.34] | NA                | NA         |
| 151 | 2.74E-03 | 2.25E-03 | 1.54E-01 | 9.81E-01 | 8.03E-01 | (0.00294,0.0348]   | (1.34,14.9]  | (0.000255,0.0184] | (0.192,21] |
| 152 | 4.02E-03 | 1.69E-03 | NA       | 9.58E-01 | 4.03E-01 | NA                 | NA           | NA                | NA         |
| 153 | 3.96E-03 | 2.51E-03 | 6.51E-02 | 1.06E+00 | 6.70E-01 | (4.25e-05,0.00294] | (0,0.101]    | (0,0.000255]      | (0,0.192]  |
| 154 | 1.51E-03 | 1.50E-03 | 3.83E-02 | 9.53E-01 | 9.50E-01 | (4.25e-05,0.00294] | (0.101,1.34] | (0,0.000255]      | (0,0.192]  |
| 155 | 1.87E-03 | 1.07E-03 | NA       | 8.37E-01 | 4.80E-01 | NA                 | NA           | NA                | NA         |
| 156 | 3.94E-03 | 5.28E-03 | 0.00E+00 | 1.00E+00 | 1.34E+00 | (0.00294,0.0348]   | (1.34,14.9]  | NA                | NA         |
| 157 | 3.15E-03 | 2.37E-03 | Inf      | 1.13E+00 | 8.47E-01 | NA                 | NA           | (0.000255,0.0184] | (0.192,21] |
| 158 | 7.10E-03 | 9.16E-03 | 0.00E+00 | 1.04E+00 | 1.35E+00 | (4.25e-05,0.00294] | (0.101,1.34] | NA                | NA         |
| 159 | 1.68E-03 | 3.13E-03 | 3.16E-01 | 9.59E-01 | 1.78E+00 | (4.25e-05,0.00294] | (1.34,14.9]  | (0.000255,0.0184] | (0.192,21] |
| 160 | 8.06E-03 | 5.02E-03 | Inf      | 9.18E-01 | 5.72E-01 | NA                 | NA           | (0.000255,0.0184] | (0,0.192]  |
| 161 | 9.88E-04 | 1.55E-03 | NA       | 1.03E+00 | 1.62E+00 | NA                 | NA           | NA                | NA         |
| 162 | 5.99E-03 | 4.22E-03 | NA       | 1.29E+00 | 9.12E-01 | NA                 | NA           | NA                | NA         |
| 163 | 3.35E-03 | 4.11E-03 | NA       | 8.89E-01 | 1.09E+00 | NA                 | NA           | NA                | NA         |
| 164 | 1.79E-03 | 2.22E-03 | NA       | 8.30E-01 | 1.03E+00 | NA                 | NA           | NA                | NA         |
| 165 | 1.11E-03 | 1.73E-03 | NA       | 9.44E-01 | 1.47E+00 | NA                 | NA           | NA                | NA         |
| 166 | 3.99E-03 | 1.50E-03 | NA       | 1.26E+00 | 4.76E-01 | NA                 | NA           | NA                | NA         |
| 167 | 1.65E-03 | 1.45E-03 | 0.00E+00 | 9.81E-01 | 8.61E-01 | (4.25e-05,0.00294] | (0.101,1.34] | NA                | NA         |
| 168 | 8.70E-04 | 6.84E-03 | NA       | 6.88E-01 | 5.41E+00 | NA                 | NA           | NA                | NA         |
| 169 | 7.40E-03 | 8.19E-03 | Inf      | 1.07E+00 | 1.18E+00 | NA                 | NA           | (0.000255,0.0184] | (0,0.192]  |
| 170 | 4.11E-03 | 5.05E-03 | NA       | 9.59E-01 | 1.18E+00 | NA                 | NA           | NA                | NA         |
| 171 | 6.86E-04 | 6.14E-04 | Inf      | 1.30E+00 | 1.17E+00 | NA                 | NA           | (0,0.000255]      | (0,0.192]  |
| 172 | 2.86E-03 | 2.15E-03 | 0.00E+00 | 1.22E+00 | 9.21E-01 | (4.25e-05,0.00294] | (0.101,1.34] | NA                | NA         |
| 173 | 3.40E-03 | 2.89E-03 | NA       | 9.51E-01 | 8.07E-01 | NA                 | NA           | NA                | NA         |
| 174 | 3.14E-03 | 4.10E-03 | NA       | 8.17E-01 | 1.07E+00 | NA                 | NA           | NA                | NA         |
| 175 | 2.02E-03 | 1.45E-03 | NA       | 8.76E-01 | 6.29E-01 | NA                 | NA           | NA                | NA         |
| 176 | 1.02E-02 | 6.09E-03 | NA       | 9.85E-01 | 5.90E-01 | NA                 | NA           | NA                | NA         |
| 177 | 5.35E-03 | 4.13E-03 | NA       | 8.90E-01 | 6.87E-01 | NA                 | NA           | NA                | NA         |
| 178 | 1.24E-02 | 1.57E-02 | NA       | 8.98E-01 | 1.14E+00 | NA                 | NA           | NA                | NA         |
| 179 | 6.43E-03 | 2.32E-03 | NA       | 1.06E+00 | 3.85E-01 | NA                 | NA           | NA                | NA         |
| 180 | 2.92E-03 | 2.07E-03 | NA       | 1.28E+00 | 9.09E-01 | NA                 | NA           | NA                | NA         |
| 181 | 1.85E-03 | 2.78E-03 | 2.52E-02 | 9.92E-01 | 1.49E+00 | (0.00294,0.0348]   | (1.34,14.9]  | (0,0.000255]      | (0,0.192]  |
| 182 | 4.10E-03 | 2.83E-03 | Inf      | 8.53E-01 | 5.88E-01 | NA                 | NA           | (0.000255,0.0184] | (0.192,21] |
| 183 | 1.76E-03 | 2.14E-03 | NA       | 9.16E-01 | 1.11E+00 | NA                 | NA           | NA                | NA         |
| 184 | 4.52E-03 | 3.15E-03 | NA       | 1.23E+00 | 8.58E-01 | NA                 | NA           | NA                | NA         |
| 185 | 3.04E-03 | 2.83E-03 | NA       | 8.97E-01 | 8.35E-01 | NA                 | NA           | NA                | NA         |
| 186 | 1.74E-03 | 6.86E-03 | NA       | 8.68E-01 | 3.43E+00 | NA                 | NA           | NA                | NA         |

|     |          |          |          |          |          |                    |              |                   |            |
|-----|----------|----------|----------|----------|----------|--------------------|--------------|-------------------|------------|
| 187 | 8.51E-04 | 1.07E-03 | NA       | 1.02E+00 | 1.28E+00 | NA                 | NA           | NA                | NA         |
| 188 | 3.63E-03 | 4.01E-03 | NA       | 8.84E-01 | 9.77E-01 | NA                 | NA           | NA                | NA         |
| 189 | 3.84E-03 | 4.68E-03 | NA       | 1.21E+00 | 1.48E+00 | NA                 | NA           | NA                | NA         |
| 190 | 2.74E-03 | 2.59E-03 | 0.00E+00 | 9.70E-01 | 9.18E-01 | (4.25e-05,0.00294] | (0,0.101]    | NA                | NA         |
| 191 | 6.66E-03 | 4.82E-03 | NA       | 1.38E+00 | 9.98E-01 | NA                 | NA           | NA                | NA         |
| 192 | 3.75E-03 | 3.05E-03 | NA       | 1.13E+00 | 9.22E-01 | NA                 | NA           | NA                | NA         |
| 193 | 1.95E-03 | 1.32E-03 | 0.00E+00 | 9.29E-01 | 6.30E-01 | (0.00294,0.0348]   | (1.34,14.9]  | NA                | NA         |
| 194 | 9.76E-03 | 5.84E-03 | NA       | 9.38E-01 | 5.61E-01 | NA                 | NA           | NA                | NA         |
| 195 | 5.39E-03 | 5.22E-03 | 0.00E+00 | 8.30E-01 | 8.03E-01 | (4.25e-05,0.00294] | (0.101,1.34] | NA                | NA         |
| 196 | 1.76E-03 | 6.47E-04 | NA       | 1.05E+00 | 3.84E-01 | NA                 | NA           | NA                | NA         |
| 197 | 3.26E-03 | 4.09E-03 | NA       | 1.03E+00 | 1.29E+00 | NA                 | NA           | NA                | NA         |
| 198 | 1.83E-03 | 2.35E-03 | NA       | 9.42E-01 | 1.20E+00 | NA                 | NA           | NA                | NA         |
| 199 | 4.52E-03 | 2.81E-03 | 1.58E+00 | 9.72E-01 | 6.05E-01 | (0.00294,0.0348]   | (0.101,1.34] | (0.000255,0.0184] | (0.192,21] |
| 200 | 9.34E-03 | 7.38E-03 | NA       | 9.74E-01 | 7.70E-01 | NA                 | NA           | NA                | NA         |
| 201 | 2.71E-03 | 6.95E-03 | NA       | 1.04E+00 | 2.67E+00 | NA                 | NA           | NA                | NA         |
| 202 | 4.27E-03 | 1.96E-03 | NA       | 8.50E-01 | 3.90E-01 | NA                 | NA           | NA                | NA         |
| 203 | 3.08E-03 | 5.53E-03 | NA       | 8.29E-01 | 1.48E+00 | NA                 | NA           | NA                | NA         |
| 204 | 2.26E-03 | 4.54E-03 | 0.00E+00 | 7.88E-01 | 1.58E+00 | (4.25e-05,0.00294] | (0.101,1.34] | NA                | NA         |
| 205 | 4.61E-03 | 2.64E-03 | NA       | 1.31E+00 | 7.50E-01 | NA                 | NA           | NA                | NA         |
| 206 | 3.34E-03 | 3.48E-03 | 0.00E+00 | 1.05E+00 | 1.09E+00 | (4.25e-05,0.00294] | (0.101,1.34] | NA                | NA         |
| 207 | 3.05E-03 | 3.69E-03 | NA       | 1.14E+00 | 1.38E+00 | NA                 | NA           | NA                | NA         |
| 208 | 1.65E-03 | 1.77E-03 | Inf      | 9.05E-01 | 9.70E-01 | NA                 | NA           | (0.000255,0.0184] | (0.192,21] |
| 209 | 2.33E-03 | 1.97E-03 | NA       | 9.31E-01 | 7.88E-01 | NA                 | NA           | NA                | NA         |
| 210 | 4.99E-03 | 3.26E-03 | NA       | 7.90E-01 | 5.17E-01 | NA                 | NA           | NA                | NA         |
| 211 | 1.22E-02 | 6.67E-03 | NA       | 2.00E+00 | 1.09E+00 | NA                 | NA           | NA                | NA         |
| 212 | 1.64E-03 | 1.34E-03 | NA       | 1.07E+00 | 8.73E-01 | NA                 | NA           | NA                | NA         |
| 213 | NA       | NA       | NA       | 8.15E-01 | NA       | NA                 | NA           | NA                | NA         |
| 214 | 7.80E-03 | 6.58E-03 | NA       | 1.24E+00 | 1.04E+00 | NA                 | NA           | NA                | NA         |
| 215 | 2.39E-03 | 2.07E-03 | NA       | 8.94E-01 | 7.76E-01 | NA                 | NA           | NA                | NA         |
| 216 | 4.10E-03 | 5.37E-03 | 5.69E-01 | 8.16E-01 | 1.07E+00 | (4.25e-05,0.00294] | (0.101,1.34] | (0.000255,0.0184] | (0,0.192]  |
| 217 | 1.34E-03 | 1.11E-03 | NA       | 9.38E-01 | 7.80E-01 | NA                 | NA           | NA                | NA         |
| 218 | 5.33E-03 | 6.15E-03 | 4.45E-01 | 1.07E+00 | 1.23E+00 | (4.25e-05,0.00294] | (0.101,1.34] | (0.000255,0.0184] | (0.192,21] |
| 219 | 5.58E-03 | 3.70E-03 | NA       | 9.41E-01 | 6.24E-01 | NA                 | NA           | NA                | NA         |
| 220 | 2.53E-03 | 2.29E-03 | 0.00E+00 | 1.07E+00 | 9.67E-01 | (4.25e-05,0.00294] | (0,0.101]    | NA                | NA         |
| 221 | 6.71E-03 | 4.68E-03 | NA       | 1.36E+00 | 9.46E-01 | NA                 | NA           | NA                | NA         |
| 222 | 3.14E-03 | 1.26E-03 | Inf      | 9.89E-01 | 3.97E-01 | NA                 | NA           | (0.000255,0.0184] | (0.192,21] |
| 223 | 1.42E-03 | 1.65E-03 | NA       | 9.42E-01 | 1.10E+00 | NA                 | NA           | NA                | NA         |
| 224 | 1.64E-03 | 2.58E-03 | NA       | 9.93E-01 | 1.56E+00 | NA                 | NA           | NA                | NA         |

|     |          |          |          |          |          |                    |              |                   |            |
|-----|----------|----------|----------|----------|----------|--------------------|--------------|-------------------|------------|
| 225 | 3.14E-03 | 1.01E-03 | NA       | 9.37E-01 | 3.03E-01 | NA                 | NA           | NA                | NA         |
| 226 | 1.63E-03 | 2.46E-03 | NA       | 8.26E-01 | 1.25E+00 | NA                 | NA           | NA                | NA         |
| 227 | 2.86E-03 | 2.41E-02 | Inf      | 1.06E+00 | 8.91E+00 | NA                 | NA           | (0.000255,0.0184] | (0,0.192]  |
| 228 | 5.30E-03 | 2.39E-03 | 0.00E+00 | 9.86E-01 | 4.44E-01 | (4.25e-05,0.00294] | (0.101,1.34] | NA                | NA         |
| 229 | 1.74E-03 | 1.68E-03 | NA       | 8.97E-01 | 8.69E-01 | NA                 | NA           | NA                | NA         |
| 230 | NA       | NA       | NA       | NA       | 1.11E+00 | NA                 | NA           | NA                | NA         |
| 231 | 2.16E-03 | 7.68E-04 | 2.49E+00 | 8.85E-01 | 3.16E-01 | (4.25e-05,0.00294] | (0,0.101]    | (0,0.000255]      | (0.192,21] |
| 232 | 1.09E-03 | 1.76E-03 | NA       | 9.44E-01 | 1.52E+00 | NA                 | NA           | NA                | NA         |
| 233 | 3.75E-03 | 1.35E-03 | NA       | 8.65E-01 | 3.12E-01 | NA                 | NA           | NA                | NA         |
| 234 | 1.42E-03 | 2.67E-03 | NA       | 9.47E-01 | 1.78E+00 | NA                 | NA           | NA                | NA         |
| 235 | 2.48E-03 | 5.65E-03 | NA       | 7.43E-01 | 1.69E+00 | NA                 | NA           | NA                | NA         |
| 236 | 1.23E-02 | 6.92E-03 | NA       | 9.71E-01 | 5.45E-01 | NA                 | NA           | NA                | NA         |
| 237 | 2.33E-03 | 4.28E-03 | NA       | 8.18E-01 | 1.50E+00 | NA                 | NA           | NA                | NA         |
| 238 | 3.90E-03 | 2.27E-03 | NA       | 1.00E+00 | 5.82E-01 | NA                 | NA           | NA                | NA         |
| 239 | 3.64E-03 | 3.72E-03 | NA       | 1.11E+00 | 1.14E+00 | NA                 | NA           | NA                | NA         |
| 240 | 4.31E-03 | 1.72E-03 | NA       | 1.25E+00 | 4.96E-01 | NA                 | NA           | NA                | NA         |
| 241 | 1.27E-02 | 7.08E-03 | NA       | 9.69E-01 | 5.40E-01 | NA                 | NA           | NA                | NA         |
| 242 | 1.34E-03 | 2.43E-03 | 0.00E+00 | 8.28E-01 | 1.51E+00 | (4.25e-05,0.00294] | (0.101,1.34] | NA                | NA         |
| 243 | 3.11E-03 | 6.55E-03 | NA       | 7.61E-01 | 1.60E+00 | NA                 | NA           | NA                | NA         |
| 244 | 8.31E-03 | 3.67E-03 | 0.00E+00 | 1.03E+00 | 4.54E-01 | (4.25e-05,0.00294] | (0.101,1.34] | NA                | NA         |
| 245 | 2.89E-03 | 1.96E-03 | NA       | 8.33E-01 | 5.66E-01 | NA                 | NA           | NA                | NA         |
| 246 | 2.71E-03 | 1.28E-03 | 2.57E-02 | 9.28E-01 | 4.39E-01 | (4.25e-05,0.00294] | (0.101,1.34] | (0,0.000255]      | (0,0.192]  |
| 247 | 6.13E-03 | 6.10E-03 | 0.00E+00 | 1.03E+00 | 1.03E+00 | (0.00294,0.0348]   | (1.34,14.9]  | NA                | NA         |
| 248 | 1.33E-03 | 1.02E-03 | 0.00E+00 | 1.10E+00 | 8.41E-01 | (0.00294,0.0348]   | (1.34,14.9]  | NA                | NA         |
| 249 | 6.12E-03 | 3.17E-03 | NA       | 1.02E+00 | 5.27E-01 | NA                 | NA           | NA                | NA         |
| 250 | 2.43E-03 | 3.08E-03 | 0.00E+00 | 9.54E-01 | 1.21E+00 | (4.25e-05,0.00294] | (0.101,1.34] | NA                | NA         |
| 251 | 2.26E-03 | 2.13E-03 | 0.00E+00 | 1.10E+00 | 1.04E+00 | (0.00294,0.0348]   | (1.34,14.9]  | NA                | NA         |
| 252 | 1.25E-03 | 5.16E-04 | NA       | 1.15E+00 | 4.76E-01 | NA                 | NA           | NA                | NA         |
| 253 | 1.51E-03 | 1.05E-03 | NA       | 1.17E+00 | 8.08E-01 | NA                 | NA           | NA                | NA         |
| 254 | 2.15E-03 | 5.69E-03 | NA       | 7.06E-01 | 1.87E+00 | NA                 | NA           | NA                | NA         |
| 255 | 4.79E-03 | 6.73E-04 | NA       | 1.10E+00 | 1.54E-01 | NA                 | NA           | NA                | NA         |
| 256 | 4.79E-03 | 6.73E-04 | NA       | 1.10E+00 | 1.54E-01 | NA                 | NA           | NA                | NA         |
| 257 | 3.95E-03 | 5.97E-03 | Inf      | 9.67E-01 | 1.46E+00 | NA                 | NA           | (0.000255,0.0184] | (0,0.192]  |
| 258 | 4.97E-03 | 3.14E-03 | NA       | 9.76E-01 | 6.18E-01 | NA                 | NA           | NA                | NA         |
| 259 | 1.74E-03 | 2.45E-03 | 5.57E-02 | 1.05E+00 | 1.48E+00 | (0.00294,0.0348]   | (1.34,14.9]  | (0.000255,0.0184] | (0.192,21] |
| 260 | 2.87E-03 | 3.57E-03 | Inf      | 8.84E-01 | 1.10E+00 | NA                 | NA           | (0.000255,0.0184] | (0.192,21] |
| 261 | 1.47E-03 | 8.95E-04 | 1.13E+00 | 8.38E-01 | 5.08E-01 | (4.25e-05,0.00294] | (0,0.101]    | (0,0.000255]      | (0,0.192]  |
| 262 | 1.53E-03 | 1.99E-03 | NA       | 9.50E-01 | 1.23E+00 | NA                 | NA           | NA                | NA         |

|     |          |          |          |          |          |                    |              |                   |            |
|-----|----------|----------|----------|----------|----------|--------------------|--------------|-------------------|------------|
| 263 | 1.16E-03 | 1.27E-03 | Inf      | 8.61E-01 | 9.47E-01 | NA                 | NA           | (0.000255,0.0184] | (0.192,21] |
| 264 | 3.63E-03 | 1.82E-03 | NA       | 9.45E-01 | 4.72E-01 | NA                 | NA           | NA                | NA         |
| 265 | 1.64E-03 | 1.41E-03 | NA       | 9.01E-01 | 7.73E-01 | NA                 | NA           | NA                | NA         |
| 266 | 9.35E-04 | 1.49E-03 | 0.00E+00 | 9.68E-01 | 1.54E+00 | (4.25e-05,0.00294] | (0.101,1.34] | NA                | NA         |
| 267 | 2.67E-03 | 2.34E-03 | NA       | 6.87E-01 | 6.03E-01 | NA                 | NA           | NA                | NA         |
| 268 | 3.99E-03 | 3.31E-03 | NA       | 1.03E+00 | 8.51E-01 | NA                 | NA           | NA                | NA         |
| 269 | 2.03E-03 | 1.38E-03 | 0.00E+00 | 9.92E-01 | 6.76E-01 | (4.25e-05,0.00294] | (0.101,1.34] | NA                | NA         |
| 270 | 1.13E-03 | 1.33E-03 | NA       | 9.95E-01 | 1.17E+00 | NA                 | NA           | NA                | NA         |
| 271 | 1.52E-02 | 1.20E-02 | NA       | 1.84E+00 | 1.45E+00 | NA                 | NA           | NA                | NA         |
| 272 | 4.25E-03 | 1.29E-03 | NA       | 1.23E+00 | 3.74E-01 | NA                 | NA           | NA                | NA         |
| 273 | 7.00E-03 | 1.34E-03 | 0.00E+00 | 1.11E+00 | 2.13E-01 | (0,4.25e-05]       | (0,0.101]    | NA                | NA         |
| 274 | 7.22E-03 | 1.09E-02 | 6.92E-02 | 7.50E-01 | 1.13E+00 | (0.00294,0.0348]   | (1.34,14.9]  | (0.000255,0.0184] | (0,0.192]  |
| 275 | 2.30E-03 | 1.85E-03 | NA       | 9.23E-01 | 7.44E-01 | NA                 | NA           | NA                | NA         |
| 276 | 4.53E-03 | 6.55E-03 | NA       | 1.03E+00 | 1.48E+00 | NA                 | NA           | NA                | NA         |
| 277 | 1.26E-03 | 2.24E-03 | NA       | 8.85E-01 | 1.58E+00 | NA                 | NA           | NA                | NA         |
| 278 | 2.63E-03 | 1.17E-03 | NA       | 9.81E-01 | 4.38E-01 | NA                 | NA           | NA                | NA         |
| 279 | 1.06E-03 | 1.44E-03 | NA       | 9.30E-01 | 1.27E+00 | NA                 | NA           | NA                | NA         |
| 280 | 1.27E-03 | 1.70E-03 | NA       | 8.64E-01 | 1.15E+00 | NA                 | NA           | NA                | NA         |
| 281 | 5.51E-03 | 3.51E-03 | 3.07E-02 | 1.05E+00 | 6.71E-01 | (4.25e-05,0.00294] | (0.101,1.34] | (0,0.000255]      | (0,0.192]  |
| 282 | 3.42E-03 | 4.22E-03 | NA       | 1.01E+00 | 1.24E+00 | NA                 | NA           | NA                | NA         |
| 283 | 2.75E-03 | 4.92E-03 | NA       | 7.69E-01 | 1.37E+00 | NA                 | NA           | NA                | NA         |
| 284 | 1.82E-03 | 1.34E-03 | NA       | 9.14E-01 | 6.75E-01 | NA                 | NA           | NA                | NA         |
| 285 | 5.70E-03 | 3.80E-03 | NA       | 1.01E+00 | 6.71E-01 | NA                 | NA           | NA                | NA         |
| 286 | 3.33E-05 | 0.00E+00 | Inf      | 4.86E-01 | 0.00E+00 | NA                 | NA           | (0.0184,Inf]      | (21,Inf]   |
| 287 | 1.35E-03 | 2.84E-03 | NA       | 7.69E-01 | 1.62E+00 | NA                 | NA           | NA                | NA         |
| 288 | 2.02E-03 | 1.52E-03 | NA       | 8.86E-01 | 6.68E-01 | NA                 | NA           | NA                | NA         |
| 289 | 5.94E-03 | 5.20E-03 | 0.00E+00 | 1.33E+00 | 1.16E+00 | (4.25e-05,0.00294] | (0,0.101]    | NA                | NA         |
| 290 | 4.67E-03 | 2.29E-03 | NA       | 1.08E+00 | 5.29E-01 | NA                 | NA           | NA                | NA         |
| 291 | 9.54E-03 | 4.59E-03 | 1.70E-02 | 1.19E+00 | 5.74E-01 | (0.00294,0.0348]   | (1.34,14.9]  | (0,0.000255]      | (0,0.192]  |
| 292 | 2.30E-03 | 2.24E-03 | NA       | 9.43E-01 | 9.18E-01 | NA                 | NA           | NA                | NA         |
| 293 | 2.53E-03 | 1.88E-03 | NA       | 8.79E-01 | 6.55E-01 | NA                 | NA           | NA                | NA         |
| 294 | 1.94E-03 | 1.51E-03 | NA       | 1.15E+00 | 8.97E-01 | NA                 | NA           | NA                | NA         |
| 295 | 1.53E-02 | 1.32E-02 | 6.32E-01 | 1.21E+00 | 1.05E+00 | (0.0348,Inf]       | (1.34,14.9]  | (0.0184,Inf]      | (0.192,21] |
| 296 | 4.15E-03 | 2.39E-03 | 0.00E+00 | 8.21E-01 | 4.72E-01 | (4.25e-05,0.00294] | (0,0.101]    | NA                | NA         |
| 297 | 1.58E-03 | 1.70E-03 | NA       | 9.87E-01 | 1.06E+00 | NA                 | NA           | NA                | NA         |
| 298 | 3.32E-03 | 1.31E-03 | NA       | 1.10E+00 | 4.33E-01 | NA                 | NA           | NA                | NA         |
| 299 | 1.23E-02 | 5.83E-03 | NA       | 1.02E+00 | 4.80E-01 | NA                 | NA           | NA                | NA         |
| 300 | 5.64E-03 | 2.39E-03 | NA       | 8.91E-01 | 3.78E-01 | NA                 | NA           | NA                | NA         |



|     |          |          |          |          |          |                    |              |                   |            |
|-----|----------|----------|----------|----------|----------|--------------------|--------------|-------------------|------------|
| 301 | 1.01E-03 | 1.86E-03 | NA       | 8.53E-01 | 1.57E+00 | NA                 | NA           | NA                | NA         |
| 302 | 1.28E-03 | 1.26E-03 | NA       | 9.11E-01 | 8.93E-01 | NA                 | NA           | NA                | NA         |
| 303 | 2.52E-03 | 3.56E-03 | NA       | 7.88E-01 | 1.12E+00 | NA                 | NA           | NA                | NA         |
| 304 | 2.64E-03 | 2.22E-03 | 0.00E+00 | 8.87E-01 | 7.45E-01 | (4.25e-05,0.00294] | (0.101,1.34] | NA                | NA         |
| 305 | 9.02E-03 | 1.91E-03 | 1.49E+00 | 9.82E-01 | 2.08E-01 | (4.25e-05,0.00294] | (0,0.101]    | (0.000255,0.0184] | (0.192,21] |
| 306 | 2.12E-03 | 2.00E-03 | NA       | 8.72E-01 | 8.25E-01 | NA                 | NA           | NA                | NA         |
| 307 | 3.37E-03 | 3.00E-04 | NA       | 1.00E+00 | 8.93E-02 | NA                 | NA           | NA                | NA         |
| 308 | 1.81E-03 | 1.84E-03 | NA       | 1.16E+00 | 1.18E+00 | NA                 | NA           | NA                | NA         |
| 309 | 3.59E-03 | 2.30E-03 | NA       | 1.07E+00 | 6.86E-01 | NA                 | NA           | NA                | NA         |
| 310 | 2.75E-03 | 2.31E-03 | 0.00E+00 | 1.13E+00 | 9.48E-01 | (4.25e-05,0.00294] | (0.101,1.34] | NA                | NA         |
| 311 | 1.92E-03 | 6.18E-04 | NA       | 1.04E+00 | 3.35E-01 | NA                 | NA           | NA                | NA         |
| 312 | 2.38E-03 | 1.43E-03 | NA       | 8.28E-01 | 4.98E-01 | NA                 | NA           | NA                | NA         |
| 313 | 1.36E-03 | 8.38E-04 | NA       | 1.03E+00 | 6.33E-01 | NA                 | NA           | NA                | NA         |
| 314 | 3.25E-03 | 4.11E-03 | NA       | 8.86E-01 | 1.12E+00 | NA                 | NA           | NA                | NA         |
| 315 | 3.50E-03 | 1.02E-03 | NA       | 1.22E+00 | 3.55E-01 | NA                 | NA           | NA                | NA         |
| 316 | 1.95E-04 | 3.09E-04 | NA       | 9.51E-01 | 1.51E+00 | NA                 | NA           | NA                | NA         |
| 317 | 3.17E-03 | 1.39E-03 | NA       | 1.09E+00 | 4.77E-01 | NA                 | NA           | NA                | NA         |
| 318 | 5.50E-04 | 1.38E-03 | NA       | 7.76E-01 | 1.95E+00 | NA                 | NA           | NA                | NA         |
| 319 | 3.64E-03 | 3.52E-03 | NA       | 9.37E-01 | 9.05E-01 | NA                 | NA           | NA                | NA         |
| 320 | 7.04E-04 | 1.14E-03 | NA       | 1.06E+00 | 1.71E+00 | NA                 | NA           | NA                | NA         |
| 321 | 2.40E-03 | 1.54E-03 | NA       | 9.89E-01 | 6.38E-01 | NA                 | NA           | NA                | NA         |
| 322 | 1.30E-03 | 1.40E-03 | NA       | 7.88E-01 | 8.49E-01 | NA                 | NA           | NA                | NA         |
| 323 | 2.10E-03 | 4.64E-03 | NA       | 8.38E-01 | 1.85E+00 | NA                 | NA           | NA                | NA         |
| 324 | 4.42E-03 | 4.43E-03 | Inf      | 1.04E+00 | 1.04E+00 | NA                 | NA           | (0,0.000255]      | (0,0.192]  |
| 325 | 3.60E-03 | 4.19E-03 | 0.00E+00 | 1.01E+00 | 1.17E+00 | (4.25e-05,0.00294] | (0,0.101]    | NA                | NA         |
| 326 | 5.69E-03 | 3.95E-03 | NA       | 9.64E-01 | 6.70E-01 | NA                 | NA           | NA                | NA         |
| 327 | 3.16E-03 | 5.70E-04 | Inf      | 1.78E+00 | 3.21E-01 | NA                 | NA           | (0,0.000255]      | (0,0.192]  |
| 328 | 7.13E-03 | 1.92E-03 | 0.00E+00 | 1.05E+00 | 2.83E-01 | (4.25e-05,0.00294] | (0.101,1.34] | NA                | NA         |
| 329 | 4.33E-03 | 3.04E-03 | NA       | 1.17E+00 | 8.19E-01 | NA                 | NA           | NA                | NA         |
| 330 | 4.81E-03 | 3.04E-03 | NA       | 1.09E+00 | 6.92E-01 | NA                 | NA           | NA                | NA         |
| 331 | 2.03E-03 | 2.04E-03 | NA       | 8.51E-01 | 8.54E-01 | NA                 | NA           | NA                | NA         |
| 332 | 2.10E-03 | 2.52E-03 | NA       | 8.33E-01 | 1.00E+00 | NA                 | NA           | NA                | NA         |
| 333 | 6.02E-03 | 2.61E-03 | Inf      | 9.15E-01 | 3.97E-01 | NA                 | NA           | (0.000255,0.0184] | (0,0.192]  |
| 334 | 2.58E-03 | 2.73E-03 | NA       | 1.06E+00 | 1.12E+00 | NA                 | NA           | NA                | NA         |
| 335 | 2.21E-03 | 2.35E-03 | 4.54E-02 | 8.94E-01 | 9.47E-01 | (0.00294,0.0348]   | (1.34,14.9]  | (0.000255,0.0184] | (0,0.192]  |
| 336 | 5.55E-03 | 7.16E-03 | NA       | 1.09E+00 | 1.40E+00 | NA                 | NA           | NA                | NA         |
| 337 | 1.81E-03 | 1.57E-03 | NA       | 8.69E-01 | 7.52E-01 | NA                 | NA           | NA                | NA         |
| 338 | 7.01E-03 | 6.14E-03 | Inf      | 9.95E-01 | 8.70E-01 | NA                 | NA           | (0.0184,Inf]      | (0.192,21] |

|     |          |          |          |          |          |                    |              |                   |            |
|-----|----------|----------|----------|----------|----------|--------------------|--------------|-------------------|------------|
| 339 | 6.14E-03 | 4.88E-03 | NA       | 9.03E-01 | 7.18E-01 | NA                 | NA           | NA                | NA         |
| 340 | 1.27E-03 | 1.39E-03 | NA       | 9.17E-01 | 1.00E+00 | NA                 | NA           | NA                | NA         |
| 341 | 1.40E-03 | 2.68E-03 | NA       | 8.81E-01 | 1.69E+00 | NA                 | NA           | NA                | NA         |
| 342 | 2.52E-03 | 2.74E-03 | 2.87E-02 | 8.37E-01 | 9.09E-01 | (0.00294,0.0348]   | (1.34,14.9]  | (0.000255,0.0184] | (0,0.192]  |
| 343 | 1.42E-03 | 2.39E-03 | NA       | 8.68E-01 | 1.47E+00 | NA                 | NA           | NA                | NA         |
| 344 | 3.57E-03 | 2.73E-03 | 0.00E+00 | 1.06E+00 | 8.13E-01 | (0.00294,0.0348]   | (0.101,1.34] | NA                | NA         |
| 345 | 3.80E-03 | 9.03E-03 | NA       | 8.97E-01 | 2.13E+00 | NA                 | NA           | NA                | NA         |
| 346 | 4.37E-03 | 9.36E-03 | NA       | 8.03E-01 | 1.72E+00 | NA                 | NA           | NA                | NA         |
| 347 | 2.15E-03 | 1.29E-03 | 0.00E+00 | 1.06E+00 | 6.34E-01 | (4.25e-05,0.00294] | (0.101,1.34] | NA                | NA         |
| 348 | 1.89E-03 | 2.14E-03 | NA       | 9.16E-01 | 1.04E+00 | NA                 | NA           | NA                | NA         |
| 349 | 2.53E-03 | 2.75E-03 | NA       | 9.30E-01 | 1.01E+00 | NA                 | NA           | NA                | NA         |
| 350 | 1.45E-03 | 8.50E-04 | NA       | 7.29E-01 | 4.28E-01 | NA                 | NA           | NA                | NA         |
| 351 | 1.81E-03 | 2.17E-03 | NA       | 1.28E+00 | 1.54E+00 | NA                 | NA           | NA                | NA         |
| 352 | 1.36E-03 | 1.71E-03 | NA       | 9.94E-01 | 1.25E+00 | NA                 | NA           | NA                | NA         |
| 353 | 1.45E-03 | 2.17E-03 | NA       | 8.16E-01 | 1.23E+00 | NA                 | NA           | NA                | NA         |
| 354 | 3.55E-03 | 2.76E-03 | 4.20E-02 | 1.28E+00 | 9.98E-01 | (0.00294,0.0348]   | (1.34,14.9]  | (0,0.000255]      | (0,0.192]  |
| 355 | 1.80E-03 | 2.99E-03 | NA       | 1.03E+00 | 1.71E+00 | NA                 | NA           | NA                | NA         |
| 356 | 7.00E-03 | 1.58E-03 | NA       | 1.41E+00 | 3.17E-01 | NA                 | NA           | NA                | NA         |
| 357 | 1.16E-03 | 1.61E-03 | NA       | 9.19E-01 | 1.28E+00 | NA                 | NA           | NA                | NA         |
| 358 | 1.07E-02 | 5.48E-03 | NA       | 1.03E+00 | 5.29E-01 | NA                 | NA           | NA                | NA         |
| 359 | 1.69E-03 | 2.85E-03 | 0.00E+00 | 1.00E+00 | 1.69E+00 | (4.25e-05,0.00294] | (0.101,1.34] | NA                | NA         |
| 360 | 4.29E-03 | 2.80E-03 | NA       | 9.97E-01 | 6.50E-01 | NA                 | NA           | NA                | NA         |
| 361 | 4.48E-03 | 5.12E-03 | NA       | 1.17E+00 | 1.34E+00 | NA                 | NA           | NA                | NA         |
| 362 | 4.72E-03 | 3.94E-03 | NA       | 1.11E+00 | 9.22E-01 | NA                 | NA           | NA                | NA         |
| 363 | 9.85E-04 | 2.09E-03 | 1.65E+00 | 6.12E-01 | 1.30E+00 | (0.00294,0.0348]   | (1.34,14.9]  | (0.000255,0.0184] | (0.192,21] |
| 364 | 9.85E-04 | 2.09E-03 | 1.65E+00 | 6.12E-01 | 1.30E+00 | (0.00294,0.0348]   | (1.34,14.9]  | (0.000255,0.0184] | (0.192,21] |
| 365 | 4.45E-03 | 5.65E-03 | Inf      | 9.02E-01 | 1.14E+00 | NA                 | NA           | (0.000255,0.0184] | (0.192,21] |
| 366 | 7.12E-03 | 2.50E-03 | NA       | 1.15E+00 | 4.02E-01 | NA                 | NA           | NA                | NA         |
| 367 | 4.02E-03 | 1.91E-03 | NA       | 9.65E-01 | 4.57E-01 | NA                 | NA           | NA                | NA         |
| 368 | 1.28E-03 | 1.89E-03 | NA       | 1.07E+00 | 1.58E+00 | NA                 | NA           | NA                | NA         |
| 369 | 1.82E-03 | 1.35E-03 | NA       | 1.25E+00 | 9.26E-01 | NA                 | NA           | NA                | NA         |
| 370 | 1.97E-03 | 2.00E-03 | NA       | 8.96E-01 | 9.09E-01 | NA                 | NA           | NA                | NA         |
| 371 | 2.83E-03 | 8.86E-04 | NA       | 8.42E-01 | 2.64E-01 | NA                 | NA           | NA                | NA         |
| 372 | 1.00E-03 | 1.85E-03 | NA       | 1.24E+00 | 2.28E+00 | NA                 | NA           | NA                | NA         |
| 373 | 4.47E-03 | 3.35E-03 | NA       | 1.36E+00 | 1.02E+00 | NA                 | NA           | NA                | NA         |
| 374 | 5.82E-04 | 1.80E-03 | NA       | 9.44E-01 | 2.93E+00 | NA                 | NA           | NA                | NA         |
| 375 | 2.07E-03 | 1.87E-03 | Inf      | 1.09E+00 | 9.84E-01 | NA                 | NA           | (0.000255,0.0184] | (0.192,21] |
| 376 | 2.42E-03 | 3.26E-03 | NA       | 9.82E-01 | 1.32E+00 | NA                 | NA           | NA                | NA         |

|     |          |          |          |          |          |                    |              |                   |            |
|-----|----------|----------|----------|----------|----------|--------------------|--------------|-------------------|------------|
| 377 | 2.99E-03 | 2.78E-03 | NA       | 8.71E-01 | 8.09E-01 | NA                 | NA           | NA                | NA         |
| 378 | 4.60E-03 | 3.35E-03 | NA       | 1.11E+00 | 8.09E-01 | NA                 | NA           | NA                | NA         |
| 379 | 3.51E-03 | 3.68E-03 | 0.00E+00 | 1.15E+00 | 1.21E+00 | (4.25e-05,0.00294] | (0.101,1.34] | NA                | NA         |
| 380 | 1.88E-03 | 1.52E-03 | NA       | 1.17E+00 | 9.41E-01 | NA                 | NA           | NA                | NA         |
| 381 | 3.22E-03 | 1.44E-03 | NA       | 9.49E-01 | 4.24E-01 | NA                 | NA           | NA                | NA         |
| 382 | 2.64E-03 | 2.80E-03 | NA       | 9.49E-01 | 1.01E+00 | NA                 | NA           | NA                | NA         |
| 383 | 7.78E-03 | 6.66E-03 | NA       | 1.46E+00 | 1.25E+00 | NA                 | NA           | NA                | NA         |
| 384 | 1.79E-03 | 2.53E-03 | NA       | 1.02E+00 | 1.44E+00 | NA                 | NA           | NA                | NA         |
| 385 | 5.70E-03 | 5.33E-03 | 1.28E-01 | 1.27E+00 | 1.19E+00 | (0.0348,Inf]       | (14.9,Inf]   | (0.000255,0.0184] | (0.192,21] |
| 386 | 2.07E-03 | 2.25E-03 | 3.20E+00 | 9.01E-01 | 9.81E-01 | (4.25e-05,0.00294] | (0.101,1.34] | (0.000255,0.0184] | (0.192,21] |
| 387 | 6.28E-03 | 9.67E-03 | NA       | 1.04E+00 | 1.61E+00 | NA                 | NA           | NA                | NA         |
| 388 | NA       | NA       | NA       | 8.94E-01 | NA       | NA                 | NA           | NA                | NA         |
| 389 | 5.84E-03 | 1.96E-03 | NA       | 1.03E+00 | 3.46E-01 | NA                 | NA           | NA                | NA         |
| 390 | 6.41E-04 | 4.12E-03 | NA       | 8.09E-01 | 5.20E+00 | NA                 | NA           | NA                | NA         |
| 391 | NA       | NA       | NA       | 8.00E-01 | NA       | NA                 | NA           | NA                | NA         |
| 392 | 2.04E-03 | 2.29E-03 | NA       | 8.97E-01 | 1.01E+00 | NA                 | NA           | NA                | NA         |
| 393 | 3.04E-03 | 3.62E-03 | NA       | 7.93E-01 | 9.44E-01 | NA                 | NA           | NA                | NA         |
| 394 | 2.73E-02 | 9.93E-03 | NA       | 1.33E+00 | 4.82E-01 | NA                 | NA           | NA                | NA         |
| 395 | 2.50E-03 | 1.53E-03 | NA       | 9.18E-01 | 5.62E-01 | NA                 | NA           | NA                | NA         |
| 396 | 1.24E-03 | 1.49E-03 | NA       | 9.62E-01 | 1.15E+00 | NA                 | NA           | NA                | NA         |
| 397 | 2.53E-03 | 1.72E-03 | NA       | 1.07E+00 | 7.29E-01 | NA                 | NA           | NA                | NA         |
| 398 | 1.61E-03 | 1.18E-03 | NA       | 1.20E+00 | 8.80E-01 | NA                 | NA           | NA                | NA         |
| 399 | 3.82E-03 | 1.76E-03 | 2.25E+00 | 7.36E-01 | 3.38E-01 | (4.25e-05,0.00294] | (0.101,1.34] | (0.000255,0.0184] | (0.192,21] |
| 400 | 1.44E-02 | 2.90E-02 | NA       | 4.58E-01 | 9.23E-01 | NA                 | NA           | NA                | NA         |
| 401 | 1.71E-03 | 1.34E-03 | NA       | 9.39E-01 | 7.40E-01 | NA                 | NA           | NA                | NA         |
| 402 | 3.51E-03 | 3.28E-03 | NA       | 8.16E-01 | 7.62E-01 | NA                 | NA           | NA                | NA         |
| 403 | 1.18E-03 | 8.06E-04 | NA       | 9.33E-01 | 6.35E-01 | NA                 | NA           | NA                | NA         |
| 404 | 3.06E-03 | 3.71E-03 | 3.79E+00 | 1.06E+00 | 1.29E+00 | (0.00294,0.0348]   | (1.34,14.9]  | (0.0184,Inf]      | (0.192,21] |
| 405 | 1.29E-02 | 9.77E-03 | 0.00E+00 | 1.10E+00 | 8.37E-01 | (4.25e-05,0.00294] | (0.101,1.34] | NA                | NA         |
| 406 | NA       | NA       | NA       | 1.19E+00 | NA       | NA                 | NA           | NA                | NA         |
| 407 | 3.56E-03 | 1.93E-03 | 0.00E+00 | 1.13E+00 | 6.10E-01 | (0.00294,0.0348]   | (1.34,14.9]  | NA                | NA         |
| 408 | 2.32E-03 | 3.80E-03 | NA       | 9.79E-01 | 1.60E+00 | NA                 | NA           | NA                | NA         |
| 409 | 4.40E-03 | 2.07E-03 | Inf      | 9.06E-01 | 4.26E-01 | NA                 | NA           | (0.0184,Inf]      | (0.192,21] |
| 410 | 1.68E-03 | 1.56E-03 | NA       | 1.07E+00 | 9.97E-01 | NA                 | NA           | NA                | NA         |
| 411 | 1.31E-02 | 1.25E-02 | 0.00E+00 | 9.00E-01 | 8.59E-01 | (4.25e-05,0.00294] | (0,0.101]    | NA                | NA         |
| 412 | 1.02E-02 | 4.94E-03 | NA       | 1.18E+00 | 5.71E-01 | NA                 | NA           | NA                | NA         |
| 413 | 7.90E-04 | 6.48E-04 | NA       | 7.37E-01 | 6.04E-01 | NA                 | NA           | NA                | NA         |
| 414 | 7.27E-03 | 8.82E-03 | NA       | 8.84E-01 | 1.07E+00 | NA                 | NA           | NA                | NA         |

|     |          |          |          |          |          |                    |              |                   |            |
|-----|----------|----------|----------|----------|----------|--------------------|--------------|-------------------|------------|
| 415 | 1.73E-03 | 1.40E-03 | NA       | 1.10E+00 | 8.85E-01 | NA                 | NA           | NA                | NA         |
| 416 | 2.25E-03 | 3.96E-03 | NA       | 9.50E-01 | 1.67E+00 | NA                 | NA           | NA                | NA         |
| 417 | 4.72E-03 | 6.09E-03 | NA       | 6.12E-01 | 7.89E-01 | NA                 | NA           | NA                | NA         |
| 418 | 2.49E-03 | 2.98E-03 | 2.37E+00 | 1.01E+00 | 1.20E+00 | (4.25e-05,0.00294] | (0.101,1.34] | (0.000255,0.0184] | (0.192,21] |
| 419 | 3.22E-03 | 4.42E-03 | NA       | 8.89E-01 | 1.22E+00 | NA                 | NA           | NA                | NA         |
| 420 | 2.96E-03 | 2.06E-03 | 0.00E+00 | 1.25E+00 | 8.68E-01 | (4.25e-05,0.00294] | (0,0.101]    | NA                | NA         |
| 421 | 2.39E-03 | 1.27E-03 | NA       | 8.13E-01 | 4.30E-01 | NA                 | NA           | NA                | NA         |
| 422 | 3.83E-03 | 4.35E-04 | NA       | 1.14E+00 | 1.29E-01 | NA                 | NA           | NA                | NA         |
| 423 | 4.43E-03 | 4.77E-03 | NA       | 9.89E-01 | 1.06E+00 | NA                 | NA           | NA                | NA         |
| 424 | 1.79E-03 | 1.00E-03 | NA       | 9.13E-01 | 5.12E-01 | NA                 | NA           | NA                | NA         |
| 425 | 2.18E-03 | 1.32E-03 | NA       | 1.24E+00 | 7.53E-01 | NA                 | NA           | NA                | NA         |
| 426 | 7.44E-03 | 5.89E-03 | NA       | 1.06E+00 | 8.37E-01 | NA                 | NA           | NA                | NA         |
| 427 | 4.58E-03 | 2.57E-03 | 0.00E+00 | 1.04E+00 | 5.83E-01 | (0.00294,0.0348]   | (1.34,14.9]  | NA                | NA         |
| 428 | 7.11E-03 | 6.24E-03 | NA       | 1.37E+00 | 1.20E+00 | NA                 | NA           | NA                | NA         |
| 429 | 7.40E-03 | 6.45E-03 | NA       | 1.13E+00 | 9.87E-01 | NA                 | NA           | NA                | NA         |
| 430 | 1.07E-02 | 5.00E-03 | 1.16E-01 | 8.97E-01 | 4.19E-01 | (0.00294,0.0348]   | (0.101,1.34] | (0.000255,0.0184] | (0.192,21] |
| 431 | 6.26E-03 | 2.74E-03 | NA       | 9.22E-01 | 4.03E-01 | NA                 | NA           | NA                | NA         |
| 432 | 6.51E-03 | 3.75E-03 | NA       | 8.49E-01 | 4.88E-01 | NA                 | NA           | NA                | NA         |
| 433 | 4.73E-04 | 1.03E-03 | NA       | 7.70E-01 | 1.67E+00 | NA                 | NA           | NA                | NA         |
| 434 | 2.18E-03 | 2.20E-03 | 5.63E-01 | 7.61E-01 | 7.71E-01 | (0.00294,0.0348]   | (1.34,14.9]  | (0.000255,0.0184] | (0.192,21] |
| 435 | 2.93E-02 | 1.01E-02 | 1.90E+00 | 1.41E+00 | 4.86E-01 | (0.00294,0.0348]   | (0.101,1.34] | (0.000255,0.0184] | (0.192,21] |
| 436 | 4.67E-03 | 5.65E-03 | Inf      | 8.75E-01 | 1.06E+00 | NA                 | NA           | (0.000255,0.0184] | (0.192,21] |
| 437 | 6.33E-03 | 4.19E-03 | NA       | 9.43E-01 | 6.24E-01 | NA                 | NA           | NA                | NA         |
| 438 | 3.83E-03 | 2.20E-03 | NA       | 1.01E+00 | 5.79E-01 | NA                 | NA           | NA                | NA         |
| 439 | 5.59E-03 | 3.31E-03 | NA       | 8.81E-01 | 5.22E-01 | NA                 | NA           | NA                | NA         |
| 440 | 4.53E-03 | 9.64E-04 | NA       | 4.46E+00 | 9.48E-01 | NA                 | NA           | NA                | NA         |
| 441 | 2.09E-03 | 5.37E-04 | NA       | 6.53E-01 | 1.68E-01 | NA                 | NA           | NA                | NA         |
| 442 | 6.32E-03 | 1.98E-03 | 0.00E+00 | 1.17E+00 | 3.67E-01 | (0.00294,0.0348]   | (0.101,1.34] | NA                | NA         |
| 443 | 6.32E-03 | 1.98E-03 | 0.00E+00 | 1.17E+00 | 3.67E-01 | (0.00294,0.0348]   | (0.101,1.34] | NA                | NA         |
| 444 | 4.59E-03 | 6.62E-03 | NA       | 8.85E-01 | 1.28E+00 | NA                 | NA           | NA                | NA         |
| 445 | 5.44E-03 | 2.34E-03 | NA       | 8.20E-01 | 3.53E-01 | NA                 | NA           | NA                | NA         |
| 446 | 2.89E-03 | 4.98E-03 | 2.92E-01 | 9.48E-01 | 1.63E+00 | (0.00294,0.0348]   | (1.34,14.9]  | (0.000255,0.0184] | (0.192,21] |
| 447 | 3.29E-03 | 1.79E-03 | NA       | 8.95E-01 | 4.89E-01 | NA                 | NA           | NA                | NA         |
| 448 | 6.00E-03 | 3.02E-03 | 0.00E+00 | 1.14E+00 | 5.73E-01 | (4.25e-05,0.00294] | (0.101,1.34] | NA                | NA         |
| 449 | 7.70E-03 | 2.39E-03 | NA       | 1.08E+00 | 3.36E-01 | NA                 | NA           | NA                | NA         |
| 450 | 7.66E-03 | 2.64E-03 | 0.00E+00 | 1.11E+00 | 3.82E-01 | (4.25e-05,0.00294] | (0.101,1.34] | NA                | NA         |
| 451 | 1.64E-03 | 1.14E-03 | Inf      | 8.99E-01 | 6.25E-01 | NA                 | NA           | (0.000255,0.0184] | (0.192,21] |
| 452 | 1.64E-03 | 1.14E-03 | Inf      | 8.99E-01 | 6.25E-01 | NA                 | NA           | (0.000255,0.0184] | (0.192,21] |

|     |          |          |          |          |          |                    |              |                   |            |
|-----|----------|----------|----------|----------|----------|--------------------|--------------|-------------------|------------|
| 453 | 3.52E-03 | 3.76E-03 | NA       | 7.55E-01 | 8.07E-01 | NA                 | NA           | NA                | NA         |
| 454 | 1.63E-03 | 2.00E-03 | NA       | 9.67E-01 | 1.18E+00 | NA                 | NA           | NA                | NA         |
| 455 | 2.26E-03 | 2.21E-03 | NA       | 8.10E-01 | 7.92E-01 | NA                 | NA           | NA                | NA         |
| 456 | 1.89E-03 | 1.65E-03 | NA       | 8.50E-01 | 7.42E-01 | NA                 | NA           | NA                | NA         |
| 457 | 2.41E-03 | 1.82E-03 | NA       | 8.86E-01 | 6.71E-01 | NA                 | NA           | NA                | NA         |
| 458 | 6.20E-04 | 1.85E-03 | NA       | 1.00E+00 | 2.98E+00 | NA                 | NA           | NA                | NA         |
| 459 | 3.23E-03 | 2.36E-03 | 0.00E+00 | 9.02E-01 | 6.60E-01 | (4.25e-05,0.00294] | (0,0.101]    | NA                | NA         |
| 460 | 1.66E-03 | 0.00E+00 | 2.01E+00 | 8.15E-01 | 0.00E+00 | (0.00294,0.0348]   | (1.34,14.9]  | (0.000255,0.0184] | (21,Inf]   |
| 461 | 1.71E-03 | 1.07E-03 | 0.00E+00 | 1.04E+00 | 6.50E-01 | (4.25e-05,0.00294] | (0.101,1.34] | NA                | NA         |
| 462 | 2.63E-03 | 7.31E-04 | NA       | 9.30E-01 | 2.59E-01 | NA                 | NA           | NA                | NA         |
| 463 | 4.88E-03 | 2.13E-03 | NA       | 1.47E+00 | 6.39E-01 | NA                 | NA           | NA                | NA         |
| 464 | 1.59E-03 | 1.67E-03 | 2.30E+02 | 6.80E-01 | 7.16E-01 | (4.25e-05,0.00294] | (0.101,1.34] | (0.0184,Inf]      | (21,Inf]   |
| 465 | 1.59E-03 | 1.67E-03 | 2.30E+02 | 6.80E-01 | 7.16E-01 | (4.25e-05,0.00294] | (0.101,1.34] | (0.0184,Inf]      | (21,Inf]   |
| 466 | 7.85E-03 | 2.26E-03 | NA       | 9.94E-01 | 2.87E-01 | NA                 | NA           | NA                | NA         |
| 467 | 2.14E-03 | 3.28E-03 | NA       | 6.61E-01 | 1.01E+00 | NA                 | NA           | NA                | NA         |
| 468 | 1.21E-03 | 1.93E-03 | Inf      | 6.79E-01 | 1.08E+00 | NA                 | NA           | (0.000255,0.0184] | (0.192,21] |
| 469 | 2.44E-03 | 6.60E-03 | 0.00E+00 | 1.10E+00 | 2.98E+00 | (4.25e-05,0.00294] | (0.101,1.34] | NA                | NA         |
| 470 | 3.94E-03 | 8.01E-03 | NA       | 6.48E-01 | 1.32E+00 | NA                 | NA           | NA                | NA         |
| 471 | 1.17E-03 | 1.93E-03 | NA       | 6.28E-01 | 1.04E+00 | NA                 | NA           | NA                | NA         |
| 472 | 1.43E-03 | 9.78E-04 | NA       | 8.99E-01 | 6.13E-01 | NA                 | NA           | NA                | NA         |
| 473 | 2.40E-03 | 2.67E-03 | NA       | 8.62E-01 | 9.57E-01 | NA                 | NA           | NA                | NA         |
| 474 | 2.68E-03 | 5.18E-03 | NA       | 8.16E-01 | 1.58E+00 | NA                 | NA           | NA                | NA         |
| 475 | 5.24E-03 | 5.84E-03 | 0.00E+00 | 9.53E-01 | 1.06E+00 | (0.00294,0.0348]   | (0.101,1.34] | NA                | NA         |
| 476 | 5.96E-03 | 3.92E-03 | NA       | 1.18E+00 | 7.81E-01 | NA                 | NA           | NA                | NA         |
| 477 | 3.49E-03 | 2.43E-03 | 0.00E+00 | 1.03E+00 | 7.16E-01 | (4.25e-05,0.00294] | (0.101,1.34] | NA                | NA         |
| 478 | 3.85E-03 | 2.62E-03 | NA       | 1.08E+00 | 7.37E-01 | NA                 | NA           | NA                | NA         |
| 479 | 1.85E-03 | 3.44E-04 | NA       | 8.91E-01 | 1.66E-01 | NA                 | NA           | NA                | NA         |
| 480 | 4.77E-03 | 1.39E-03 | NA       | 8.73E-01 | 2.55E-01 | NA                 | NA           | NA                | NA         |
| 481 | 6.25E-03 | 2.72E-03 | NA       | 9.88E-01 | 4.29E-01 | NA                 | NA           | NA                | NA         |
| 482 | 4.93E-03 | 6.37E-03 | NA       | 1.04E+00 | 1.35E+00 | NA                 | NA           | NA                | NA         |
| 483 | 4.90E-03 | 2.66E-03 | NA       | 1.12E+00 | 6.07E-01 | NA                 | NA           | NA                | NA         |
| 484 | 4.28E-03 | 6.74E-03 | 4.44E-01 | 1.26E+00 | 1.98E+00 | (0.00294,0.0348]   | (1.34,14.9]  | (0.000255,0.0184] | (0.192,21] |
| 485 | 1.54E-03 | 1.06E-03 | NA       | 8.17E-01 | 5.63E-01 | NA                 | NA           | NA                | NA         |
| 486 | 4.81E-03 | 8.66E-03 | NA       | 9.50E-01 | 1.71E+00 | NA                 | NA           | NA                | NA         |
| 487 | 1.90E-03 | 1.04E-03 | NA       | 1.05E+00 | 5.75E-01 | NA                 | NA           | NA                | NA         |
| 488 | 4.16E-03 | 5.05E-03 | NA       | 9.34E-01 | 1.13E+00 | NA                 | NA           | NA                | NA         |
| 489 | 7.41E-03 | 4.30E-03 | 2.42E+00 | 1.06E+00 | 6.16E-01 | (0.00294,0.0348]   | (0.101,1.34] | (0.000255,0.0184] | (0.192,21] |
| 490 | 3.26E-03 | 2.29E-03 | NA       | 8.52E-01 | 5.99E-01 | NA                 | NA           | NA                | NA         |

|     |          |          |          |          |          |                    |              |                   |            |
|-----|----------|----------|----------|----------|----------|--------------------|--------------|-------------------|------------|
| 491 | 3.36E-03 | 3.67E-03 | NA       | 1.05E+00 | 1.14E+00 | NA                 | NA           | NA                | NA         |
| 492 | 4.09E-03 | 2.98E-03 | NA       | 9.87E-01 | 7.18E-01 | NA                 | NA           | NA                | NA         |
| 493 | 1.50E-03 | 1.19E-03 | NA       | 1.05E+00 | 8.28E-01 | NA                 | NA           | NA                | NA         |
| 494 | 4.33E-03 | 6.47E-03 | 7.95E-01 | 9.54E-01 | 1.43E+00 | (0.00294,0.0348]   | (1.34,14.9]  | (0.0184,Inf]      | (0.192,21] |
| 495 | 3.15E-03 | 2.38E-03 | 6.83E+00 | 9.90E-01 | 7.49E-01 | (0.00294,0.0348]   | (1.34,14.9]  | (0.0184,Inf]      | (0.192,21] |
| 496 | 1.26E-03 | 1.85E-03 | NA       | 8.38E-01 | 1.23E+00 | NA                 | NA           | NA                | NA         |
| 497 | 4.09E-03 | 3.26E-03 | NA       | 7.33E-01 | 5.85E-01 | NA                 | NA           | NA                | NA         |
| 498 | 2.46E-03 | 2.96E-03 | 0.00E+00 | 8.52E-01 | 1.02E+00 | (4.25e-05,0.00294] | (0.101,1.34] | NA                | NA         |
| 499 | 1.02E-02 | 5.45E-03 | NA       | 1.40E+00 | 7.50E-01 | NA                 | NA           | NA                | NA         |
| 500 | 3.44E-03 | 1.60E-03 | NA       | 1.46E+00 | 6.79E-01 | NA                 | NA           | NA                | NA         |
| 501 | 2.38E-03 | 2.54E-03 | NA       | 1.09E+00 | 1.16E+00 | NA                 | NA           | NA                | NA         |
| 502 | 3.01E-03 | 1.90E-03 | NA       | 1.03E+00 | 6.49E-01 | NA                 | NA           | NA                | NA         |
| 503 | 3.35E-03 | 3.10E-03 | NA       | 7.94E-01 | 7.34E-01 | NA                 | NA           | NA                | NA         |
| 504 | 2.31E-03 | 3.95E-03 | NA       | 3.21E-01 | 5.49E-01 | NA                 | NA           | NA                | NA         |
| 505 | 4.18E-03 | 4.01E-03 | NA       | 1.04E+00 | 9.97E-01 | NA                 | NA           | NA                | NA         |
| 506 | 2.44E-03 | 2.03E-03 | NA       | 9.24E-01 | 7.71E-01 | NA                 | NA           | NA                | NA         |
| 507 | 1.94E-02 | 3.62E-02 | NA       | 4.05E-01 | 7.55E-01 | NA                 | NA           | NA                | NA         |
| 508 | 2.81E-03 | 3.49E-03 | NA       | 7.60E-01 | 9.44E-01 | NA                 | NA           | NA                | NA         |
| 509 | 5.40E-03 | 1.13E-02 | 0.00E+00 | 1.16E+00 | 2.41E+00 | (4.25e-05,0.00294] | (0.101,1.34] | NA                | NA         |
| 510 | 1.87E-03 | 1.65E-03 | NA       | 8.67E-01 | 7.68E-01 | NA                 | NA           | NA                | NA         |
| 511 | 1.40E-03 | 2.19E-03 | NA       | 6.79E-01 | 1.06E+00 | NA                 | NA           | NA                | NA         |
| 512 | 3.38E-03 | 5.60E-03 | NA       | 1.51E+00 | 2.50E+00 | NA                 | NA           | NA                | NA         |
| 513 | 2.52E-03 | 2.99E-03 | NA       | 8.97E-01 | 1.06E+00 | NA                 | NA           | NA                | NA         |
| 514 | 1.84E-02 | 1.66E-02 | NA       | 1.12E+00 | 1.01E+00 | NA                 | NA           | NA                | NA         |
| 515 | 1.39E-03 | 2.32E-03 | 0.00E+00 | 1.00E+00 | 1.67E+00 | (4.25e-05,0.00294] | (0.101,1.34] | NA                | NA         |
| 516 | 5.08E-03 | 1.42E-03 | NA       | 1.08E+00 | 3.02E-01 | NA                 | NA           | NA                | NA         |
| 517 | 9.70E-03 | 8.03E-03 | NA       | 1.03E+00 | 8.52E-01 | NA                 | NA           | NA                | NA         |
| 518 | 3.20E-03 | 3.20E-03 | NA       | 1.05E+00 | 1.05E+00 | NA                 | NA           | NA                | NA         |
| 519 | 7.92E-04 | 0.00E+00 | NA       | 1.13E+00 | 0.00E+00 | NA                 | NA           | NA                | NA         |
| 520 | 2.87E-03 | 1.15E-03 | NA       | 1.26E+00 | 5.07E-01 | NA                 | NA           | NA                | NA         |
| 521 | 2.44E-03 | 3.93E-03 | NA       | 7.87E-01 | 1.27E+00 | NA                 | NA           | NA                | NA         |
| 522 | 4.88E-03 | 1.57E-03 | NA       | 1.07E+00 | 3.46E-01 | NA                 | NA           | NA                | NA         |
| 523 | 3.62E-03 | 2.18E-03 | 3.65E-01 | 9.00E-01 | 5.41E-01 | (4.25e-05,0.00294] | (0.101,1.34] | (0.000255,0.0184] | (0,0.192]  |
| 524 | 7.49E-04 | 1.66E-03 | NA       | 9.41E-01 | 2.09E+00 | NA                 | NA           | NA                | NA         |
| 525 | 2.28E-03 | 2.79E-03 | NA       | 8.23E-01 | 1.01E+00 | NA                 | NA           | NA                | NA         |
| 526 | 7.25E-03 | 8.46E-03 | 2.95E-02 | 9.44E-01 | 1.10E+00 | (0.00294,0.0348]   | (1.34,14.9]  | (0.000255,0.0184] | (0,0.192]  |
| 527 | 2.36E-03 | 6.81E-03 | NA       | 8.54E-01 | 2.47E+00 | NA                 | NA           | NA                | NA         |
| 528 | 2.97E-03 | 1.29E-03 | NA       | 9.16E-01 | 3.98E-01 | NA                 | NA           | NA                | NA         |

|     |          |          |          |          |          |                    |              |              |           |
|-----|----------|----------|----------|----------|----------|--------------------|--------------|--------------|-----------|
| 529 | 1.04E-02 | 1.19E-02 | 0.00E+00 | 9.11E-01 | 1.04E+00 | (4.25e-05,0.00294] | (0,0.101]    | NA           | NA        |
| 530 | 5.81E-03 | 4.82E-03 | NA       | 8.75E-01 | 7.26E-01 | NA                 | NA           | NA           | NA        |
| 531 | 4.49E-03 | 4.17E-03 | NA       | 1.17E+00 | 1.09E+00 | NA                 | NA           | NA           | NA        |
| 532 | 1.77E-03 | 1.32E-03 | NA       | 8.39E-01 | 6.24E-01 | NA                 | NA           | NA           | NA        |
| 533 | 4.25E-03 | 2.93E-03 | NA       | 1.10E+00 | 7.57E-01 | NA                 | NA           | NA           | NA        |
| 534 | 3.12E-03 | 2.64E-03 | NA       | 9.50E-01 | 8.06E-01 | NA                 | NA           | NA           | NA        |
| 535 | 3.03E-03 | 2.66E-03 | Inf      | 1.16E+00 | 1.01E+00 | NA                 | NA           | (0,0.000255] | (0,0.192] |
| 536 | 6.67E-03 | 1.78E-03 | NA       | 1.01E+00 | 2.70E-01 | NA                 | NA           | NA           | NA        |
| 537 | 1.32E-03 | 4.60E-04 | NA       | 9.61E-01 | 3.34E-01 | NA                 | NA           | NA           | NA        |
| 538 | 2.60E-03 | 4.17E-04 | NA       | 1.05E+00 | 1.68E-01 | NA                 | NA           | NA           | NA        |
| 539 | 2.32E-03 | 1.57E-03 | NA       | 8.33E-01 | 5.64E-01 | NA                 | NA           | NA           | NA        |
| 540 | 1.94E-03 | 2.65E-03 | NA       | 1.03E+00 | 1.42E+00 | NA                 | NA           | NA           | NA        |
| 541 | 0.00E+00 | 2.81E-04 | NA       | 5.06E-01 | Inf      | NA                 | NA           | NA           | NA        |
| 542 | 3.03E-03 | 2.88E-03 | NA       | 8.54E-01 | 8.12E-01 | NA                 | NA           | NA           | NA        |
| 543 | 1.60E-03 | 3.13E-03 | 0.00E+00 | 1.04E+00 | 2.04E+00 | (0.00294,0.0348]   | (1.34,14.9]  | NA           | NA        |
| 544 | 4.73E-03 | 2.11E-03 | 0.00E+00 | 9.58E-01 | 4.29E-01 | (0.00294,0.0348]   | (1.34,14.9]  | NA           | NA        |
| 545 | NA       | NA       | NA       | 1.43E+00 | NA       | NA                 | NA           | NA           | NA        |
| 546 | 3.40E-03 | 9.17E-04 | NA       | 1.16E+00 | 3.13E-01 | NA                 | NA           | NA           | NA        |
| 547 | 5.76E-03 | 3.69E-03 | NA       | 7.88E-01 | 5.05E-01 | NA                 | NA           | NA           | NA        |
| 548 | 5.06E-03 | 3.56E-03 | NA       | 1.06E+00 | 7.43E-01 | NA                 | NA           | NA           | NA        |
| 549 | 4.45E-03 | 1.48E-02 | NA       | 3.53E-01 | 1.18E+00 | NA                 | NA           | NA           | NA        |
| 550 | 1.94E-03 | 2.25E-03 | NA       | 1.20E+00 | 1.39E+00 | NA                 | NA           | NA           | NA        |
| 551 | 2.92E-03 | 3.44E-03 | 0.00E+00 | 9.05E-01 | 1.06E+00 | (4.25e-05,0.00294] | (0.101,1.34] | NA           | NA        |
| 552 | 2.16E-03 | 8.43E-04 | NA       | 1.25E+00 | 4.88E-01 | NA                 | NA           | NA           | NA        |
| 553 | 1.13E-03 | 2.38E-03 | 0.00E+00 | 1.06E+00 | 2.24E+00 | (4.25e-05,0.00294] | (0.101,1.34] | NA           | NA        |
| 554 | 3.51E-03 | 1.14E-03 | NA       | 7.76E-01 | 2.52E-01 | NA                 | NA           | NA           | NA        |
| 555 | 1.58E-03 | 1.85E-03 | NA       | 7.22E-01 | 8.47E-01 | NA                 | NA           | NA           | NA        |
| 556 | 2.00E-03 | 0.00E+00 | NA       | 7.13E-01 | 0.00E+00 | NA                 | NA           | NA           | NA        |
| 557 | 3.24E-03 | 9.84E-04 | NA       | 1.11E+00 | 3.38E-01 | NA                 | NA           | NA           | NA        |
| 558 | 3.95E-03 | 2.37E-03 | NA       | 1.11E+00 | 6.67E-01 | NA                 | NA           | NA           | NA        |
| 559 | 1.65E-03 | 3.42E-03 | NA       | 9.19E-01 | 1.90E+00 | NA                 | NA           | NA           | NA        |
| 560 | 4.07E-03 | 1.52E-03 | NA       | 9.21E-01 | 3.44E-01 | NA                 | NA           | NA           | NA        |
| 561 | 4.47E-03 | 1.49E-03 | NA       | 9.37E-01 | 3.12E-01 | NA                 | NA           | NA           | NA        |
| 562 | 5.46E-03 | 4.16E-04 | NA       | 1.16E+00 | 8.88E-02 | NA                 | NA           | NA           | NA        |
| 563 | 1.51E-03 | 1.24E-03 | NA       | 1.22E+00 | 9.93E-01 | NA                 | NA           | NA           | NA        |
| 564 | 3.36E-03 | 8.15E-04 | NA       | 8.82E-01 | 2.14E-01 | NA                 | NA           | NA           | NA        |
| 565 | 1.84E-03 | 3.44E-03 | NA       | 9.99E-01 | 1.87E+00 | NA                 | NA           | NA           | NA        |
| 566 | 2.07E-03 | 9.55E-04 | NA       | 1.13E+00 | 5.22E-01 | NA                 | NA           | NA           | NA        |

|     |          |          |          |          |          |                    |              |                   |            |
|-----|----------|----------|----------|----------|----------|--------------------|--------------|-------------------|------------|
| 567 | 1.08E-02 | 9.93E-03 | NA       | 1.14E+00 | 1.05E+00 | NA                 | NA           | NA                | NA         |
| 568 | 9.75E-03 | 4.54E-03 | NA       | 9.47E-01 | 4.41E-01 | NA                 | NA           | NA                | NA         |
| 569 | 2.57E-03 | 2.32E-03 | NA       | 9.36E-01 | 8.47E-01 | NA                 | NA           | NA                | NA         |
| 570 | 7.26E-03 | 3.35E-03 | 0.00E+00 | 9.01E-01 | 4.15E-01 | (4.25e-05,0.00294] | (0.101,1.34] | NA                | NA         |
| 571 | 1.25E-03 | 1.56E-03 | NA       | 7.64E-01 | 9.59E-01 | NA                 | NA           | NA                | NA         |
| 572 | 1.42E-02 | 8.78E-03 | NA       | 9.63E-01 | 5.97E-01 | NA                 | NA           | NA                | NA         |
| 573 | 6.83E-03 | 5.50E-03 | NA       | 1.59E+00 | 1.28E+00 | NA                 | NA           | NA                | NA         |
| 574 | 5.55E-03 | 1.91E-03 | NA       | 1.24E+00 | 4.26E-01 | NA                 | NA           | NA                | NA         |
| 575 | 7.02E-03 | 2.85E-03 | NA       | 1.16E+00 | 4.70E-01 | NA                 | NA           | NA                | NA         |
| 576 | 1.99E-03 | 3.25E-03 | NA       | 1.20E+00 | 1.96E+00 | NA                 | NA           | NA                | NA         |
| 577 | 1.96E-03 | 2.72E-03 | NA       | 1.02E+00 | 1.41E+00 | NA                 | NA           | NA                | NA         |
| 578 | 5.11E-03 | 5.15E-03 | NA       | 1.03E+00 | 1.04E+00 | NA                 | NA           | NA                | NA         |
| 579 | 2.55E-03 | 1.82E-03 | NA       | 1.09E+00 | 7.74E-01 | NA                 | NA           | NA                | NA         |
| 580 | 4.48E-03 | 3.52E-03 | NA       | 1.09E+00 | 8.57E-01 | NA                 | NA           | NA                | NA         |
| 581 | 2.05E-03 | 3.33E-03 | NA       | 9.79E-01 | 1.59E+00 | NA                 | NA           | NA                | NA         |
| 582 | 2.16E-03 | 1.35E-03 | NA       | 1.36E+00 | 8.46E-01 | NA                 | NA           | NA                | NA         |
| 583 | 1.19E-02 | 7.86E-03 | 2.14E-02 | 1.26E+00 | 8.34E-01 | (0.0348,Inf]       | (1.34,14.9]  | (0.000255,0.0184] | (0,0.192]  |
| 584 | 3.62E-03 | 3.90E-03 | NA       | 6.46E-01 | 6.97E-01 | NA                 | NA           | NA                | NA         |
| 585 | 2.33E-03 | 3.09E-03 | NA       | 5.53E-01 | 7.31E-01 | NA                 | NA           | NA                | NA         |
| 586 | 3.65E-03 | 1.73E-03 | NA       | 9.59E-01 | 4.54E-01 | NA                 | NA           | NA                | NA         |
| 587 | 1.43E-03 | 1.44E-03 | NA       | 8.90E-01 | 8.90E-01 | NA                 | NA           | NA                | NA         |
| 588 | 3.89E-04 | 4.62E-04 | NA       | 7.73E-01 | 9.18E-01 | NA                 | NA           | NA                | NA         |
| 589 | 2.72E-03 | 2.70E-03 | NA       | 9.65E-01 | 9.59E-01 | NA                 | NA           | NA                | NA         |
| 590 | 8.97E-04 | 7.03E-04 | NA       | 9.07E-01 | 7.11E-01 | NA                 | NA           | NA                | NA         |
| 591 | 1.22E-03 | 2.89E-03 | NA       | 8.25E-01 | 1.96E+00 | NA                 | NA           | NA                | NA         |
| 592 | 2.16E-03 | 3.13E-03 | NA       | 1.03E+00 | 1.50E+00 | NA                 | NA           | NA                | NA         |
| 593 | 1.57E-03 | 5.79E-03 | NA       | 8.03E-01 | 2.97E+00 | NA                 | NA           | NA                | NA         |
| 594 | 1.85E-03 | 1.61E-03 | NA       | 8.28E-01 | 7.23E-01 | NA                 | NA           | NA                | NA         |
| 595 | 5.68E-03 | 2.74E-03 | NA       | 1.13E+00 | 5.45E-01 | NA                 | NA           | NA                | NA         |
| 596 | 4.23E-03 | 0.00E+00 | NA       | 1.21E+00 | 0.00E+00 | NA                 | NA           | NA                | NA         |
| 597 | 2.91E-03 | 1.21E-03 | NA       | 9.68E-01 | 4.01E-01 | NA                 | NA           | NA                | NA         |
| 598 | 6.10E-03 | 3.84E-03 | 7.05E-01 | 1.13E+00 | 7.11E-01 | (0.0348,Inf]       | (1.34,14.9]  | (0.0184,Inf]      | (0.192,21] |
| 599 | 2.14E-03 | 5.62E-03 | NA       | 8.79E-01 | 2.31E+00 | NA                 | NA           | NA                | NA         |
| 600 | 3.17E-03 | 7.37E-04 | NA       | 8.38E-01 | 1.95E-01 | NA                 | NA           | NA                | NA         |
| 601 | 6.26E-03 | 6.39E-03 | NA       | 6.87E-01 | 7.01E-01 | NA                 | NA           | NA                | NA         |
| 602 | 9.08E-03 | 2.49E-03 | NA       | 1.13E+00 | 3.10E-01 | NA                 | NA           | NA                | NA         |
| 603 | 3.80E-03 | 6.77E-03 | 0.00E+00 | 8.53E-01 | 1.52E+00 | (0.00294,0.0348]   | (1.34,14.9]  | NA                | NA         |
| 604 | 2.32E-03 | 4.90E-03 | NA       | 1.13E+00 | 2.39E+00 | NA                 | NA           | NA                | NA         |



|     |          |          |          |          |          |                    |              |                   |            |
|-----|----------|----------|----------|----------|----------|--------------------|--------------|-------------------|------------|
| 605 | 2.58E-03 | 5.52E-04 | 1.30E+01 | 7.38E-01 | 1.58E-01 | (0.00294,0.0348]   | (1.34,14.9]  | (0.0184,Inf]      | (21,Inf]   |
| 606 | 1.90E-03 | 6.07E-03 | NA       | 6.36E-01 | 2.03E+00 | NA                 | NA           | NA                | NA         |
| 607 | 1.73E-02 | 1.10E-02 | NA       | 8.75E-01 | 5.57E-01 | NA                 | NA           | NA                | NA         |
| 608 | 4.25E-03 | 1.39E-03 | NA       | 9.03E-01 | 2.95E-01 | NA                 | NA           | NA                | NA         |
| 609 | 6.04E-03 | 1.53E-03 | NA       | 1.03E+00 | 2.61E-01 | NA                 | NA           | NA                | NA         |
| 610 | 1.74E-03 | 1.61E-03 | NA       | 1.03E+00 | 9.60E-01 | NA                 | NA           | NA                | NA         |
| 611 | 2.32E-03 | 2.84E-03 | NA       | 1.12E+00 | 1.37E+00 | NA                 | NA           | NA                | NA         |
| 612 | NA       | NA       | NA       | 1.10E+00 | NA       | NA                 | NA           | NA                | NA         |
| 613 | 3.15E-03 | 3.41E-03 | NA       | 1.04E+00 | 1.13E+00 | NA                 | NA           | NA                | NA         |
| 614 | 2.17E-03 | 2.40E-03 | NA       | 7.21E-01 | 7.97E-01 | NA                 | NA           | NA                | NA         |
| 615 | 3.54E-03 | 2.04E-03 | NA       | 6.12E-01 | 3.54E-01 | NA                 | NA           | NA                | NA         |
| 616 | 2.52E-03 | 3.10E-03 | NA       | 1.16E+00 | 1.43E+00 | NA                 | NA           | NA                | NA         |
| 617 | 2.31E-03 | 1.81E-03 | 0.00E+00 | 8.20E-01 | 6.43E-01 | (4.25e-05,0.00294] | (0.101,1.34] | NA                | NA         |
| 618 | 2.16E-03 | 1.97E-02 | 4.00E-02 | 1.47E+00 | 1.34E+01 | (0.0348,Inf]       | (14.9,Inf]   | (0.000255,0.0184] | (0.192,21] |
| 619 | 5.09E-03 | 3.33E-03 | NA       | 1.05E+00 | 6.88E-01 | NA                 | NA           | NA                | NA         |
| 620 | 3.02E-03 | 3.11E-03 | NA       | 7.53E-01 | 7.75E-01 | NA                 | NA           | NA                | NA         |
| 621 | 2.03E-03 | 7.67E-04 | NA       | 9.33E-01 | 3.53E-01 | NA                 | NA           | NA                | NA         |
| 622 | 1.26E-03 | 2.72E-03 | NA       | 6.64E-01 | 1.43E+00 | NA                 | NA           | NA                | NA         |
| 623 | 4.51E-03 | 3.06E-03 | NA       | 9.85E-01 | 6.69E-01 | NA                 | NA           | NA                | NA         |
| 624 | 5.77E-04 | 1.73E-03 | NA       | 1.42E+00 | 4.24E+00 | NA                 | NA           | NA                | NA         |
| 625 | 1.74E-03 | 7.27E-04 | NA       | 8.08E-01 | 3.38E-01 | NA                 | NA           | NA                | NA         |
| 626 | 3.58E-03 | 5.95E-03 | NA       | 1.05E+00 | 1.75E+00 | NA                 | NA           | NA                | NA         |
| 627 | 9.96E-03 | 6.54E-03 | NA       | 1.39E+00 | 9.12E-01 | NA                 | NA           | NA                | NA         |
| 628 | 2.82E-02 | 4.40E-04 | NA       | 1.31E+00 | 2.05E-02 | NA                 | NA           | NA                | NA         |
| 629 | 4.41E-03 | 6.76E-03 | 8.06E-01 | 8.76E-01 | 1.34E+00 | (4.25e-05,0.00294] | (0.101,1.34] | (0.000255,0.0184] | (0,0.192]  |
| 630 | 3.27E-03 | 1.39E-02 | NA       | 8.98E-01 | 3.83E+00 | NA                 | NA           | NA                | NA         |
| 631 | 1.96E-03 | 1.58E-03 | NA       | 7.33E-01 | 5.94E-01 | NA                 | NA           | NA                | NA         |
| 632 | 2.05E-03 | 2.93E-03 | NA       | 9.98E-01 | 1.43E+00 | NA                 | NA           | NA                | NA         |
| 633 | 1.12E-03 | 6.63E-04 | NA       | 8.82E-01 | 5.20E-01 | NA                 | NA           | NA                | NA         |
| 634 | 2.23E-03 | 2.52E-03 | NA       | 7.16E-01 | 8.08E-01 | NA                 | NA           | NA                | NA         |
| 635 | 2.39E-03 | 2.12E-03 | NA       | 1.11E+00 | 9.90E-01 | NA                 | NA           | NA                | NA         |
| 636 | 2.18E-03 | 2.79E-03 | NA       | 6.61E-01 | 8.48E-01 | NA                 | NA           | NA                | NA         |
| 637 | 1.33E-03 | 2.09E-03 | NA       | 1.22E+00 | 1.92E+00 | NA                 | NA           | NA                | NA         |
| 638 | 4.38E-04 | 1.84E-03 | NA       | 7.36E-01 | 3.09E+00 | NA                 | NA           | NA                | NA         |
| 639 | 4.40E-03 | 5.25E-03 | NA       | 9.15E-01 | 1.09E+00 | NA                 | NA           | NA                | NA         |
| 640 | 1.10E-03 | 1.40E-03 | NA       | 7.72E-01 | 9.85E-01 | NA                 | NA           | NA                | NA         |
| 641 | 4.61E-03 | 2.40E-03 | NA       | 1.27E+00 | 6.63E-01 | NA                 | NA           | NA                | NA         |
| 642 | 5.73E-03 | 2.19E-03 | NA       | 8.97E-01 | 3.43E-01 | NA                 | NA           | NA                | NA         |

|     |          |          |          |          |          |                    |              |              |            |
|-----|----------|----------|----------|----------|----------|--------------------|--------------|--------------|------------|
| 643 | 4.77E-03 | 4.95E-03 | NA       | 8.29E-01 | 8.60E-01 | NA                 | NA           | NA           | NA         |
| 644 | 8.27E-03 | 5.17E-03 | NA       | 6.64E-01 | 4.15E-01 | NA                 | NA           | NA           | NA         |
| 645 | 3.68E-03 | 2.02E-03 | NA       | 4.48E-01 | 2.45E-01 | NA                 | NA           | NA           | NA         |
| 646 | 5.90E-03 | 6.83E-03 | NA       | 8.29E-01 | 9.60E-01 | NA                 | NA           | NA           | NA         |
| 647 | 2.29E-03 | 1.74E-03 | NA       | 8.75E-01 | 6.66E-01 | NA                 | NA           | NA           | NA         |
| 648 | 1.71E-03 | 3.07E-03 | 0.00E+00 | 7.81E-01 | 1.40E+00 | (4.25e-05,0.00294] | (0.101,1.34] | NA           | NA         |
| 649 | 3.79E-03 | 4.54E-03 | NA       | 1.00E+00 | 1.21E+00 | NA                 | NA           | NA           | NA         |
| 650 | NA       | NA       | NA       | 2.12E+00 | NA       | NA                 | NA           | NA           | NA         |
| 651 | 4.34E-03 | 4.38E-03 | 0.00E+00 | 9.58E-01 | 9.65E-01 | (4.25e-05,0.00294] | (0.101,1.34] | NA           | NA         |
| 652 | 3.22E-03 | 1.70E-03 | NA       | 1.08E+00 | 5.67E-01 | NA                 | NA           | NA           | NA         |
| 653 | 4.37E-03 | 7.74E-03 | NA       | 9.53E-01 | 1.69E+00 | NA                 | NA           | NA           | NA         |
| 654 | 2.93E-03 | 2.57E-03 | 0.00E+00 | 1.00E+00 | 8.76E-01 | (4.25e-05,0.00294] | (0.101,1.34] | NA           | NA         |
| 655 | 1.54E-02 | 3.96E-02 | NA       | 1.02E+00 | 2.64E+00 | NA                 | NA           | NA           | NA         |
| 656 | 5.70E-03 | 1.24E-03 | NA       | 9.13E-01 | 1.99E-01 | NA                 | NA           | NA           | NA         |
| 657 | 7.56E-03 | 2.44E-03 | NA       | 1.07E+00 | 3.45E-01 | NA                 | NA           | NA           | NA         |
| 658 | 6.80E-03 | 4.32E-03 | 5.73E-01 | 1.08E+00 | 6.87E-01 | (0.0348,Inf]       | (14.9,Inf]   | (0.0184,Inf] | (0.192,21] |
| 659 | 7.12E-03 | 2.69E-03 | NA       | 7.99E-01 | 3.02E-01 | NA                 | NA           | NA           | NA         |
| 660 | 3.53E-03 | 3.14E-03 | NA       | 1.02E+00 | 9.10E-01 | NA                 | NA           | NA           | NA         |
| 661 | NA       | NA       | NA       | 6.73E-01 | NA       | NA                 | NA           | NA           | NA         |
| 662 | 5.61E-03 | 1.90E-03 | 0.00E+00 | 9.60E-01 | 3.25E-01 | (0.00294,0.0348]   | (1.34,14.9]  | NA           | NA         |
| 663 | 3.01E-03 | 3.93E-03 | NA       | 9.51E-01 | 1.24E+00 | NA                 | NA           | NA           | NA         |
| 664 | 1.54E-03 | 1.11E-03 | NA       | 6.85E-01 | 4.92E-01 | NA                 | NA           | NA           | NA         |
| 665 | 0.00E+00 | 3.34E-03 | NA       | 1.43E+00 | Inf      | NA                 | NA           | NA           | NA         |
| 666 | 7.81E-03 | 3.49E-03 | NA       | 9.82E-01 | 4.38E-01 | NA                 | NA           | NA           | NA         |
| 667 | 4.90E-03 | 5.86E-03 | NA       | 1.09E+00 | 1.31E+00 | NA                 | NA           | NA           | NA         |
| 668 | 4.05E-03 | 4.92E-03 | 0.00E+00 | 8.70E-01 | 1.06E+00 | (0.0348,Inf]       | (1.34,14.9]  | NA           | NA         |
| 669 | 3.36E-03 | 1.12E-03 | NA       | 1.22E+00 | 4.07E-01 | NA                 | NA           | NA           | NA         |
| 670 | 6.24E-04 | 0.00E+00 | NA       | 8.46E-01 | 0.00E+00 | NA                 | NA           | NA           | NA         |
| 671 | 1.50E-03 | 1.60E-03 | NA       | 7.84E-01 | 8.36E-01 | NA                 | NA           | NA           | NA         |
| 672 | NA       | NA       | NA       | 7.07E-01 | NA       | NA                 | NA           | NA           | NA         |
| 673 | 1.27E-02 | 8.57E-03 | 9.80E-01 | 9.02E-01 | 6.08E-01 | (0.0348,Inf]       | (1.34,14.9]  | (0.0184,Inf] | (0.192,21] |
| 674 | 7.34E-03 | 4.42E-03 | NA       | 8.73E-01 | 5.26E-01 | NA                 | NA           | NA           | NA         |
| 675 | 3.41E-03 | 2.87E-03 | NA       | 6.39E-01 | 5.37E-01 | NA                 | NA           | NA           | NA         |
| 676 | 2.99E-03 | 2.61E-03 | 0.00E+00 | 1.02E+00 | 8.94E-01 | (4.25e-05,0.00294] | (0,0.101]    | NA           | NA         |
| 677 | 1.94E-03 | 1.10E-03 | NA       | 8.88E-01 | 5.03E-01 | NA                 | NA           | NA           | NA         |
| 678 | NA       | NA       | NA       | 9.77E-01 | NA       | NA                 | NA           | NA           | NA         |
| 679 | 1.68E-03 | 4.27E-03 | NA       | 7.21E-01 | 1.83E+00 | NA                 | NA           | NA           | NA         |
| 680 | 5.18E-03 | 2.85E-03 | NA       | 6.21E-01 | 3.42E-01 | NA                 | NA           | NA           | NA         |

|     |          |          |          |          |          |                    |              |                   |            |
|-----|----------|----------|----------|----------|----------|--------------------|--------------|-------------------|------------|
| 681 | 1.84E-03 | 0.00E+00 | NA       | 1.06E+00 | 0.00E+00 | NA                 | NA           | NA                | NA         |
| 682 | 1.16E-03 | 9.57E-04 | NA       | 9.46E-01 | 7.84E-01 | NA                 | NA           | NA                | NA         |
| 683 | 2.18E-03 | 5.98E-03 | NA       | 9.00E-01 | 2.47E+00 | NA                 | NA           | NA                | NA         |
| 684 | 5.89E-03 | 5.74E-03 | NA       | 7.88E-01 | 7.67E-01 | NA                 | NA           | NA                | NA         |
| 685 | 2.18E-03 | 2.39E-03 | NA       | 8.69E-01 | 9.51E-01 | NA                 | NA           | NA                | NA         |
| 686 | 8.70E-03 | 2.47E-03 | 0.00E+00 | 1.08E+00 | 3.09E-01 | (0.00294,0.0348]   | (0.101,1.34] | NA                | NA         |
| 687 | 1.19E-02 | 7.17E-03 | NA       | 9.65E-01 | 5.80E-01 | NA                 | NA           | NA                | NA         |
| 688 | 3.88E-03 | 1.10E-02 | NA       | 7.05E-01 | 2.00E+00 | NA                 | NA           | NA                | NA         |
| 689 | 2.95E-03 | 3.77E-04 | NA       | 1.24E+00 | 1.58E-01 | NA                 | NA           | NA                | NA         |
| 690 | 4.32E-03 | 1.49E-03 | NA       | 8.58E-01 | 2.96E-01 | NA                 | NA           | NA                | NA         |
| 691 | 2.60E-03 | 5.17E-03 | 0.00E+00 | 1.33E+00 | 2.63E+00 | (0.00294,0.0348]   | (1.34,14.9]  | NA                | NA         |
| 692 | 1.13E-03 | 3.00E-03 | Inf      | 9.27E-01 | 2.46E+00 | NA                 | NA           | (0.000255,0.0184] | (0.192,21] |
| 693 | 1.43E-02 | 5.08E-03 | NA       | 1.18E+00 | 4.21E-01 | NA                 | NA           | NA                | NA         |
| 694 | 6.21E-03 | 6.12E-03 | 0.00E+00 | 1.15E+00 | 1.14E+00 | (0.00294,0.0348]   | (0.101,1.34] | NA                | NA         |
| 695 | 5.32E-03 | 5.70E-03 | 0.00E+00 | 1.26E+00 | 1.35E+00 | (0.00294,0.0348]   | (1.34,14.9]  | NA                | NA         |
| 696 | 1.69E-03 | 3.10E-03 | NA       | 6.58E-01 | 1.21E+00 | NA                 | NA           | NA                | NA         |
| 697 | 4.24E-03 | 0.00E+00 | NA       | 8.88E-01 | 0.00E+00 | NA                 | NA           | NA                | NA         |
| 698 | 1.75E-03 | 1.42E-02 | 0.00E+00 | 1.23E+00 | 9.98E+00 | (0.0348,Inf]       | (14.9,Inf]   | NA                | NA         |
| 699 | 3.90E-03 | 4.20E-03 | NA       | 9.95E-01 | 1.07E+00 | NA                 | NA           | NA                | NA         |
| 700 | 1.70E-03 | 1.32E-03 | NA       | 1.13E+00 | 8.78E-01 | NA                 | NA           | NA                | NA         |
| 701 | 1.25E-03 | 2.33E-03 | NA       | 1.07E+00 | 2.00E+00 | NA                 | NA           | NA                | NA         |
| 702 | 5.85E-03 | 1.07E-03 | NA       | 1.14E+00 | 2.07E-01 | NA                 | NA           | NA                | NA         |
| 703 | 9.74E-04 | 8.86E-04 | NA       | 7.93E-01 | 7.21E-01 | NA                 | NA           | NA                | NA         |
| 704 | 1.33E-02 | 4.05E-03 | NA       | 1.30E+00 | 3.93E-01 | NA                 | NA           | NA                | NA         |
| 705 | 2.38E-03 | 1.17E-03 | 0.00E+00 | 8.74E-01 | 4.30E-01 | (4.25e-05,0.00294] | (0.101,1.34] | NA                | NA         |
| 706 | 5.28E-03 | 3.99E-03 | NA       | 8.52E-01 | 6.43E-01 | NA                 | NA           | NA                | NA         |
| 707 | 6.06E-03 | 4.63E-03 | NA       | 1.08E+00 | 8.29E-01 | NA                 | NA           | NA                | NA         |
| 708 | 2.02E-03 | 1.84E-03 | 0.00E+00 | 6.95E-01 | 6.34E-01 | (4.25e-05,0.00294] | (0.101,1.34] | NA                | NA         |
| 709 | 6.92E-03 | 4.45E-03 | 8.49E-02 | 1.15E+00 | 7.40E-01 | (0.00294,0.0348]   | (0.101,1.34] | (0.000255,0.0184] | (0,0.192]  |
| 710 | 6.99E-04 | 2.18E-03 | NA       | 8.66E-01 | 2.70E+00 | NA                 | NA           | NA                | NA         |
| 711 | 7.37E-03 | 3.46E-03 | NA       | 1.11E+00 | 5.20E-01 | NA                 | NA           | NA                | NA         |
| 712 | 6.63E-04 | 0.00E+00 | NA       | 6.69E-01 | 0.00E+00 | NA                 | NA           | NA                | NA         |
| 713 | 5.10E-03 | 6.43E-03 | NA       | 7.61E-01 | 9.59E-01 | NA                 | NA           | NA                | NA         |
| 714 | 1.44E-02 | 1.04E-02 | NA       | 1.06E+00 | 7.62E-01 | NA                 | NA           | NA                | NA         |
| 715 | 4.35E-03 | 1.92E-03 | NA       | 1.05E+00 | 4.62E-01 | NA                 | NA           | NA                | NA         |
| 716 | 3.98E-03 | 5.96E-03 | NA       | 9.03E-01 | 1.35E+00 | NA                 | NA           | NA                | NA         |
| 717 | 4.94E-03 | 1.10E-02 | 6.09E-02 | 9.96E-01 | 2.22E+00 | (0.0348,Inf]       | (14.9,Inf]   | (0.000255,0.0184] | (0.192,21] |
| 718 | 4.94E-03 | 1.10E-02 | 6.09E-02 | 9.96E-01 | 2.22E+00 | (0.0348,Inf]       | (14.9,Inf]   | (0.000255,0.0184] | (0.192,21] |

|     |          |          |          |          |          |                  |              |                   |            |
|-----|----------|----------|----------|----------|----------|------------------|--------------|-------------------|------------|
| 719 | 2.72E-03 | 2.29E-03 | 4.58E+01 | 9.08E-01 | 7.62E-01 | (0.00294,0.0348] | (1.34,14.9]  | (0.0184,Inf]      | (21,Inf]   |
| 720 | 2.72E-03 | 2.29E-03 | 4.58E+01 | 9.08E-01 | 7.62E-01 | (0.00294,0.0348] | (1.34,14.9]  | (0.0184,Inf]      | (21,Inf]   |
| 721 | 6.73E-03 | 6.43E-03 | NA       | 8.30E-01 | 7.93E-01 | NA               | NA           | NA                | NA         |
| 722 | 4.77E-03 | 1.30E-03 | NA       | 1.07E+00 | 2.91E-01 | NA               | NA           | NA                | NA         |
| 723 | 8.54E-03 | 2.90E-03 | 0.00E+00 | 1.18E+00 | 4.00E-01 | (0.00294,0.0348] | (0.101,1.34] | NA                | NA         |
| 724 | 1.17E-03 | 8.96E-04 | NA       | 1.16E+00 | 8.88E-01 | NA               | NA           | NA                | NA         |
| 725 | 4.30E-03 | 1.36E-02 | 0.00E+00 | 1.65E+00 | 5.21E+00 | (0.00294,0.0348] | (1.34,14.9]  | NA                | NA         |
| 726 | 5.87E-03 | 2.67E-03 | NA       | 1.00E+00 | 4.56E-01 | NA               | NA           | NA                | NA         |
| 727 | 4.21E-03 | 3.36E-03 | NA       | 1.07E+00 | 8.54E-01 | NA               | NA           | NA                | NA         |
| 728 | 3.52E-03 | 1.94E-03 | 0.00E+00 | 1.10E+00 | 6.04E-01 | (0.00294,0.0348] | (0.101,1.34] | NA                | NA         |
| 729 | 3.56E-03 | 1.85E-03 | NA       | 8.85E-01 | 4.61E-01 | NA               | NA           | NA                | NA         |
| 730 | 4.13E-03 | 2.79E-03 | NA       | 1.29E+00 | 8.69E-01 | NA               | NA           | NA                | NA         |
| 731 | 1.01E-02 | 4.43E-03 | 0.00E+00 | 1.28E+00 | 5.61E-01 | (0.00294,0.0348] | (1.34,14.9]  | NA                | NA         |
| 732 | 3.18E-03 | 1.56E-03 | NA       | 6.49E-01 | 3.20E-01 | NA               | NA           | NA                | NA         |
| 733 | NA       | NA       | NA       | 5.43E-01 | NA       | NA               | NA           | NA                | NA         |
| 734 | 1.67E-03 | 6.12E-03 | NA       | 5.84E-01 | 2.14E+00 | NA               | NA           | NA                | NA         |
| 735 | 3.70E-03 | 3.99E-03 | Inf      | 8.29E-01 | 8.92E-01 | NA               | NA           | (0.0184,Inf]      | (0.192,21] |
| 736 | 8.03E-03 | 7.54E-03 | 0.00E+00 | 1.15E+00 | 1.08E+00 | (0.00294,0.0348] | (0.101,1.34] | NA                | NA         |
| 737 | 2.85E-03 | 1.01E-03 | NA       | 1.27E+00 | 4.51E-01 | NA               | NA           | NA                | NA         |
| 738 | 3.08E-03 | 3.88E-03 | NA       | 1.17E+00 | 1.48E+00 | NA               | NA           | NA                | NA         |
| 739 | 8.09E-03 | 2.88E-03 | NA       | 1.07E+00 | 3.83E-01 | NA               | NA           | NA                | NA         |
| 740 | 1.69E-02 | 1.36E-03 | 0.00E+00 | 9.58E+00 | 7.72E-01 | (0.00294,0.0348] | (0.101,1.34] | NA                | NA         |
| 741 | 6.16E-03 | 5.43E-04 | 1.56E+00 | 1.11E+00 | 9.81E-02 | (0.00294,0.0348] | (0.101,1.34] | (0.000255,0.0184] | (0.192,21] |
| 742 | 2.90E-03 | 4.99E-03 | 0.00E+00 | 1.53E+00 | 2.63E+00 | (0.00294,0.0348] | (1.34,14.9]  | NA                | NA         |
| 743 | NA       | NA       | 5.48E-01 | NA       | 1.07E+00 | NA               | (0.101,1.34] | NA                | (0,0.192]  |
| 744 | 2.23E-02 | 8.48E-03 | 6.17E-01 | 1.24E+00 | 4.73E-01 | (0.0348,Inf]     | (1.34,14.9]  | (0.0184,Inf]      | (0.192,21] |
| 745 | 3.80E-03 | 0.00E+00 | NA       | 1.21E+00 | 0.00E+00 | NA               | NA           | NA                | NA         |
| 746 | 4.06E-04 | 3.36E-03 | NA       | 7.50E-01 | 6.22E+00 | NA               | NA           | NA                | NA         |
| 747 | 4.60E-03 | 9.60E-03 | 0.00E+00 | 1.41E+00 | 2.95E+00 | (0.0348,Inf]     | (14.9,Inf]   | NA                | NA         |
| 748 | 2.58E-03 | 9.71E-04 | NA       | 1.21E+00 | 4.57E-01 | NA               | NA           | NA                | NA         |
| 749 | 0.00E+00 | 8.76E-04 | NA       | 7.24E-01 | Inf      | NA               | NA           | NA                | NA         |
| 750 | 2.40E-02 | 3.12E-02 | 0.00E+00 | 7.77E-01 | 1.01E+00 | (0.00294,0.0348] | (0.101,1.34] | NA                | NA         |
| 751 | 1.98E-03 | 5.47E-03 | NA       | 5.42E-01 | 1.50E+00 | NA               | NA           | NA                | NA         |
| 752 | 1.42E-02 | 6.15E-03 | NA       | 1.04E+00 | 4.52E-01 | NA               | NA           | NA                | NA         |
| 753 | 4.84E-03 | 2.88E-03 | NA       | 9.98E-01 | 5.94E-01 | NA               | NA           | NA                | NA         |
| 754 | 7.27E-03 | 4.13E-03 | NA       | 7.59E-01 | 4.31E-01 | NA               | NA           | NA                | NA         |
| 755 | 3.44E-03 | 3.36E-03 | NA       | 8.87E-01 | 8.67E-01 | NA               | NA           | NA                | NA         |
| 756 | 4.10E-03 | 2.02E-03 | 1.65E+01 | 1.29E+00 | 6.35E-01 | (0.00294,0.0348] | (0.101,1.34] | (0.0184,Inf]      | (21,Inf]   |

|     |          |          |          |          |          |                    |              |                   |            |
|-----|----------|----------|----------|----------|----------|--------------------|--------------|-------------------|------------|
| 757 | 3.48E-03 | 2.45E-03 | NA       | 1.30E+00 | 9.17E-01 | NA                 | NA           | NA                | NA         |
| 758 | 2.26E-03 | 6.56E-03 | NA       | 1.00E+00 | 2.90E+00 | NA                 | NA           | NA                | NA         |
| 759 | 2.46E-03 | 1.25E-03 | NA       | 9.58E-01 | 4.84E-01 | NA                 | NA           | NA                | NA         |
| 760 | NA       | NA       | NA       | NA       | 6.42E-01 | NA                 | NA           | NA                | NA         |
| 761 | 3.06E-03 | 8.30E-03 | NA       | 6.25E-01 | 1.69E+00 | NA                 | NA           | NA                | NA         |
| 762 | 3.42E-03 | 7.07E-03 | 0.00E+00 | 1.28E+00 | 2.65E+00 | (0.0348,Inf]       | (14.9,Inf]   | NA                | NA         |
| 763 | 2.26E-03 | 4.36E-03 | NA       | 7.27E-01 | 1.40E+00 | NA                 | NA           | NA                | NA         |
| 764 | 0.00E+00 | 6.37E-04 | NA       | 9.65E-01 | Inf      | NA                 | NA           | NA                | NA         |
| 765 | 0.00E+00 | 0.00E+00 | NA       | 9.99E-01 | NA       | NA                 | NA           | NA                | NA         |
| 766 | 2.72E-03 | 0.00E+00 | NA       | 9.72E-01 | 0.00E+00 | NA                 | NA           | NA                | NA         |
| 767 | 7.51E-03 | 3.85E-03 | 7.78E-01 | 1.26E+00 | 6.47E-01 | (0.00294,0.0348]   | (1.34,14.9]  | (0.000255,0.0184] | (0.192,21] |
| 768 | 2.35E-03 | 5.89E-04 | NA       | 9.90E-01 | 2.48E-01 | NA                 | NA           | NA                | NA         |
| 769 | 8.76E-03 | 1.02E-03 | NA       | 9.30E-01 | 1.08E-01 | NA                 | NA           | NA                | NA         |
| 770 | 8.32E-03 | 0.00E+00 | NA       | 9.29E-01 | 0.00E+00 | NA                 | NA           | NA                | NA         |
| 771 | 6.08E-03 | 4.51E-03 | 1.25E+02 | 8.46E-01 | 6.28E-01 | (4.25e-05,0.00294] | (0.101,1.34] | (0.0184,Inf]      | (21,Inf]   |
| 772 | NA       | NA       | NA       | 7.54E-01 | NA       | NA                 | NA           | NA                | NA         |
| 773 | 3.75E-03 | 4.10E-03 | NA       | 8.78E-01 | 9.61E-01 | NA                 | NA           | NA                | NA         |
| 774 | NA       | NA       | NA       | 1.18E+00 | NA       | NA                 | NA           | NA                | NA         |
| 775 | 1.33E-02 | 4.07E-03 | NA       | 9.65E-01 | 2.95E-01 | NA                 | NA           | NA                | NA         |
| 776 | 5.14E-04 | 2.45E-03 | 0.00E+00 | 8.32E-01 | 3.97E+00 | (0.00294,0.0348]   | (1.34,14.9]  | NA                | NA         |
| 777 | 3.73E-03 | 9.76E-03 | 0.00E+00 | 7.71E-01 | 2.02E+00 | (0.00294,0.0348]   | (1.34,14.9]  | NA                | NA         |
| 778 | 6.22E-03 | 8.08E-03 | NA       | 1.01E+00 | 1.31E+00 | NA                 | NA           | NA                | NA         |
| 779 | 3.16E-03 | 3.13E-03 | NA       | 6.07E-01 | 6.01E-01 | NA                 | NA           | NA                | NA         |
| 780 | 2.10E-02 | 3.91E-03 | NA       | 8.72E-01 | 1.62E-01 | NA                 | NA           | NA                | NA         |
| 781 | 1.42E-03 | 8.37E-04 | NA       | 1.20E+00 | 7.07E-01 | NA                 | NA           | NA                | NA         |
| 782 | 1.43E-02 | 1.59E-02 | NA       | 1.51E+00 | 1.67E+00 | NA                 | NA           | NA                | NA         |
| 783 | 6.93E-04 | 2.64E-03 | 2.19E+00 | 9.64E-01 | 3.68E+00 | (0.00294,0.0348]   | (1.34,14.9]  | (0.000255,0.0184] | (0.192,21] |
| 784 | 3.02E-03 | 2.07E-03 | NA       | 1.03E+00 | 7.03E-01 | NA                 | NA           | NA                | NA         |
| 785 | 5.42E-03 | 7.41E-03 | NA       | 8.44E-01 | 1.15E+00 | NA                 | NA           | NA                | NA         |
| 786 | 1.14E-03 | 2.61E-03 | NA       | 1.03E+00 | 2.37E+00 | NA                 | NA           | NA                | NA         |
| 787 | 7.72E-03 | 7.41E-03 | NA       | 7.81E-01 | 7.50E-01 | NA                 | NA           | NA                | NA         |
| 788 | 4.74E-03 | 4.78E-03 | 1.13E-02 | 1.07E+00 | 1.08E+00 | (0.0348,Inf]       | (1.34,14.9]  | (0.000255,0.0184] | (0,0.192]  |
| 789 | NA       | NA       | NA       | 6.76E-01 | NA       | NA                 | NA           | NA                | NA         |
| 790 | 2.39E-03 | 2.09E-03 | NA       | 7.60E-01 | 6.66E-01 | NA                 | NA           | NA                | NA         |
| 791 | 2.69E-03 | 3.88E-03 | 0.00E+00 | 9.36E-01 | 1.35E+00 | (0.00294,0.0348]   | (1.34,14.9]  | NA                | NA         |
| 792 | 7.77E-03 | 3.27E-03 | NA       | 9.17E-01 | 3.86E-01 | NA                 | NA           | NA                | NA         |
| 793 | 6.60E-03 | 4.92E-03 | NA       | 8.41E-01 | 6.27E-01 | NA                 | NA           | NA                | NA         |
| 794 | 3.61E-03 | 5.11E-04 | 0.00E+00 | 8.51E-01 | 1.20E-01 | (4.25e-05,0.00294] | (0.101,1.34] | NA                | NA         |

|     |          |          |          |          |          |                  |              |                   |            |
|-----|----------|----------|----------|----------|----------|------------------|--------------|-------------------|------------|
| 795 | 1.97E-02 | 4.69E-03 | NA       | 2.66E+00 | 6.32E-01 | NA               | NA           | NA                | NA         |
| 796 | 1.45E-03 | 3.02E-03 | NA       | 1.14E+00 | 2.37E+00 | NA               | NA           | NA                | NA         |
| 797 | 2.61E-03 | 0.00E+00 | NA       | 8.11E-01 | 0.00E+00 | NA               | NA           | NA                | NA         |
| 798 | 0.00E+00 | 0.00E+00 | NA       | 9.48E-01 | NA       | NA               | NA           | NA                | NA         |
| 799 | 3.07E-02 | 1.07E-02 | 0.00E+00 | 2.47E+00 | 8.61E-01 | (0.0348,Inf]     | (0.101,1.34] | NA                | NA         |
| 800 | 3.98E-03 | 5.37E-03 | NA       | 9.15E-01 | 1.24E+00 | NA               | NA           | NA                | NA         |
| 801 | 0.00E+00 | 2.05E-03 | NA       | 6.46E-01 | Inf      | NA               | NA           | NA                | NA         |
| 802 | NA       | NA       | NA       | 1.43E+00 | NA       | NA               | NA           | NA                | NA         |
| 803 | 3.06E-03 | 4.88E-03 | NA       | 9.85E-01 | 1.57E+00 | NA               | NA           | NA                | NA         |
| 804 | 2.27E-04 | 0.00E+00 | NA       | 9.18E-01 | 0.00E+00 | NA               | NA           | NA                | NA         |
| 805 | 1.27E-03 | 9.68E-03 | Inf      | 7.73E-01 | 5.88E+00 | NA               | NA           | (0.000255,0.0184] | (0.192,21] |
| 806 | 1.76E-03 | 1.35E-03 | NA       | 7.47E-01 | 5.73E-01 | NA               | NA           | NA                | NA         |
| 807 | 6.22E-04 | 1.52E-03 | NA       | 9.42E-01 | 2.30E+00 | NA               | NA           | NA                | NA         |
| 808 | 3.18E-03 | 4.13E-03 | 0.00E+00 | 8.21E-01 | 1.07E+00 | (0.00294,0.0348] | (1.34,14.9]  | NA                | NA         |
| 809 | 3.01E-03 | 0.00E+00 | NA       | 7.40E-01 | 0.00E+00 | NA               | NA           | NA                | NA         |
| 810 | 2.85E-03 | 4.58E-04 | Inf      | 6.58E-01 | 1.06E-01 | NA               | NA           | (0.0184,Inf]      | (21,Inf]   |
| 811 | 5.85E-03 | 8.19E-03 | NA       | 8.89E-01 | 1.24E+00 | NA               | NA           | NA                | NA         |
| 812 | 4.21E-03 | 2.11E-03 | NA       | 9.21E-01 | 4.62E-01 | NA               | NA           | NA                | NA         |
| 813 | 3.26E-03 | 1.14E-03 | NA       | 1.48E+00 | 5.17E-01 | NA               | NA           | NA                | NA         |
| 814 | 1.71E-03 | 1.99E-03 | NA       | 8.58E-01 | 9.98E-01 | NA               | NA           | NA                | NA         |
| 815 | 4.47E-03 | 2.52E-03 | 0.00E+00 | 6.32E-01 | 3.57E-01 | (0.00294,0.0348] | (1.34,14.9]  | NA                | NA         |
| 816 | 3.39E-03 | 4.23E-03 | NA       | 5.30E-01 | 6.63E-01 | NA               | NA           | NA                | NA         |
| 817 | 3.64E-03 | 3.06E-04 | NA       | 1.59E+00 | 1.34E-01 | NA               | NA           | NA                | NA         |
| 818 | 1.85E-03 | 0.00E+00 | NA       | 6.49E-01 | 0.00E+00 | NA               | NA           | NA                | NA         |
| 819 | 0.00E+00 | 1.01E-03 | NA       | 7.11E-01 | Inf      | NA               | NA           | NA                | NA         |
| 820 | 2.41E-03 | 4.37E-03 | NA       | 6.84E-01 | 1.24E+00 | NA               | NA           | NA                | NA         |
| 821 | 1.71E-02 | 3.25E-02 | 0.00E+00 | 8.55E-01 | 1.63E+00 | (0.00294,0.0348] | (0.101,1.34] | NA                | NA         |
| 822 | 2.64E-03 | 1.48E-03 | NA       | 1.04E+00 | 5.85E-01 | NA               | NA           | NA                | NA         |
| 823 | 1.79E-03 | 3.30E-03 | NA       | 6.22E-01 | 1.14E+00 | NA               | NA           | NA                | NA         |
| 824 | 3.46E-04 | 0.00E+00 | NA       | 6.52E-01 | 0.00E+00 | NA               | NA           | NA                | NA         |
| 825 | 0.00E+00 | 2.24E-03 | NA       | 7.42E-01 | Inf      | NA               | NA           | NA                | NA         |
| 826 | 1.75E-03 | 4.63E-03 | 0.00E+00 | 1.12E+00 | 2.97E+00 | (0.00294,0.0348] | (1.34,14.9]  | NA                | NA         |
| 827 | 2.85E-03 | 3.63E-03 | NA       | 8.81E-01 | 1.12E+00 | NA               | NA           | NA                | NA         |
| 828 | 4.04E-03 | 1.14E-02 | NA       | 7.09E-01 | 2.00E+00 | NA               | NA           | NA                | NA         |
| 829 | 1.13E-03 | 1.96E-03 | NA       | 1.06E+00 | 1.83E+00 | NA               | NA           | NA                | NA         |
| 830 | 1.55E-03 | 3.33E-03 | NA       | 1.53E+00 | 3.29E+00 | NA               | NA           | NA                | NA         |
| 831 | 9.92E-03 | 7.84E-03 | 0.00E+00 | 7.94E-01 | 6.28E-01 | (0.00294,0.0348] | (0.101,1.34] | NA                | NA         |
| 832 | 5.01E-03 | 6.59E-03 | NA       | 9.23E-01 | 1.21E+00 | NA               | NA           | NA                | NA         |

|     |          |          |          |          |          |                    |              |                   |            |
|-----|----------|----------|----------|----------|----------|--------------------|--------------|-------------------|------------|
| 833 | 1.94E-02 | 2.77E-02 | NA       | 1.07E+00 | 1.53E+00 | NA                 | NA           | NA                | NA         |
| 834 | 1.94E-02 | 2.77E-02 | NA       | 1.07E+00 | 1.53E+00 | NA                 | NA           | NA                | NA         |
| 835 | 7.97E-03 | 1.35E-02 | NA       | 6.77E-01 | 1.15E+00 | NA                 | NA           | NA                | NA         |
| 836 | 3.21E-03 | 2.33E-03 | NA       | 8.20E-01 | 5.94E-01 | NA                 | NA           | NA                | NA         |
| 837 | 2.08E-03 | 5.24E-03 | 0.00E+00 | 7.24E-01 | 1.82E+00 | (0.00294,0.0348]   | (1.34,14.9]  | NA                | NA         |
| 838 | 3.43E-03 | 3.19E-04 | NA       | 2.22E+00 | 2.06E-01 | NA                 | NA           | NA                | NA         |
| 839 | NA       | NA       | NA       | 6.36E-01 | NA       | NA                 | NA           | NA                | NA         |
| 840 | 7.56E-04 | 1.38E-03 | NA       | 8.74E-01 | 1.59E+00 | NA                 | NA           | NA                | NA         |
| 841 | 3.80E-03 | 0.00E+00 | NA       | 7.88E-01 | 0.00E+00 | NA                 | NA           | NA                | NA         |
| 842 | 2.89E-03 | 7.79E-03 | NA       | 1.25E+00 | 3.37E+00 | NA                 | NA           | NA                | NA         |
| 843 | NA       | NA       | NA       | 9.77E-01 | NA       | NA                 | NA           | NA                | NA         |
| 844 | 0.00E+00 | 0.00E+00 | NA       | 9.44E-01 | NA       | NA                 | NA           | NA                | NA         |
| 845 | 9.84E-05 | 1.66E-03 | NA       | 1.24E+00 | 2.08E+01 | NA                 | NA           | NA                | NA         |
| 846 | 2.48E-03 | 1.96E-03 | NA       | 9.34E-01 | 7.39E-01 | NA                 | NA           | NA                | NA         |
| 847 | 6.77E-03 | 4.74E-03 | NA       | 9.14E-01 | 6.39E-01 | NA                 | NA           | NA                | NA         |
| 848 | 2.62E-03 | 2.33E-03 | NA       | 6.25E-01 | 5.56E-01 | NA                 | NA           | NA                | NA         |
| 849 | 1.08E-03 | 2.29E-03 | NA       | 6.21E-01 | 1.31E+00 | NA                 | NA           | NA                | NA         |
| 850 | 1.08E-03 | 2.29E-03 | NA       | 6.21E-01 | 1.31E+00 | NA                 | NA           | NA                | NA         |
| 851 | 3.36E-03 | 6.06E-04 | NA       | 7.71E-01 | 1.39E-01 | NA                 | NA           | NA                | NA         |
| 852 | 2.94E-03 | 0.00E+00 | Inf      | 8.50E-01 | 0.00E+00 | NA                 | NA           | (0.000255,0.0184] | (21,Inf]   |
| 853 | 2.83E-03 | 2.93E-03 | NA       | 8.71E-01 | 9.05E-01 | NA                 | NA           | NA                | NA         |
| 854 | 5.37E-03 | 4.93E-03 | NA       | 6.40E-01 | 5.87E-01 | NA                 | NA           | NA                | NA         |
| 855 | 1.69E-03 | 1.24E-03 | 0.00E+00 | 1.08E+00 | 7.90E-01 | (4.25e-05,0.00294] | (0.101,1.34] | NA                | NA         |
| 856 | 2.71E-03 | 3.32E-03 | NA       | 6.33E-01 | 7.74E-01 | NA                 | NA           | NA                | NA         |
| 857 | 7.11E-03 | 6.03E-03 | Inf      | 1.12E+00 | 9.51E-01 | NA                 | NA           | (0.000255,0.0184] | (0.192,21] |
| 858 | 1.18E-03 | 0.00E+00 | NA       | 9.89E-01 | 0.00E+00 | NA                 | NA           | NA                | NA         |
| 859 | 5.79E-03 | 0.00E+00 | NA       | 9.64E-01 | 0.00E+00 | NA                 | NA           | NA                | NA         |
| 860 | 4.84E-03 | 0.00E+00 | NA       | 9.34E-01 | 0.00E+00 | NA                 | NA           | NA                | NA         |
| 861 | 1.10E-02 | 4.80E-03 | NA       | 9.68E-01 | 4.21E-01 | NA                 | NA           | NA                | NA         |
| 862 | 4.43E-03 | 4.66E-03 | NA       | 8.71E-01 | 9.17E-01 | NA                 | NA           | NA                | NA         |
| 863 | 3.43E-03 | 5.54E-03 | NA       | 7.06E-01 | 1.14E+00 | NA                 | NA           | NA                | NA         |
| 864 | 3.59E-03 | 2.14E-03 | NA       | 1.06E+00 | 6.29E-01 | NA                 | NA           | NA                | NA         |
| 865 | 3.93E-03 | 1.30E-03 | Inf      | 8.29E-01 | 2.75E-01 | NA                 | NA           | (0.0184,Inf]      | (21,Inf]   |
| 866 | 3.43E-03 | 0.00E+00 | NA       | 5.88E-01 | 0.00E+00 | NA                 | NA           | NA                | NA         |
| 867 | 2.74E-03 | 0.00E+00 | NA       | 1.10E+00 | 0.00E+00 | NA                 | NA           | NA                | NA         |
| 868 | 4.33E-03 | 0.00E+00 | NA       | 1.06E+00 | 0.00E+00 | NA                 | NA           | NA                | NA         |
| 869 | 3.71E-03 | 2.97E-03 | NA       | 1.09E+00 | 8.70E-01 | NA                 | NA           | NA                | NA         |
| 870 | 5.04E-03 | 3.99E-03 | Inf      | 7.20E-01 | 5.71E-01 | NA                 | NA           | (0.000255,0.0184] | (0.192,21] |

|     |          |          |          |          |          |                    |              |                   |            |
|-----|----------|----------|----------|----------|----------|--------------------|--------------|-------------------|------------|
| 871 | 1.94E-03 | 4.81E-03 | NA       | 8.44E-01 | 2.09E+00 | NA                 | NA           | NA                | NA         |
| 872 | 1.10E-02 | 6.57E-03 | 0.00E+00 | 9.29E-01 | 5.58E-01 | (0.00294,0.0348]   | (0.101,1.34] | NA                | NA         |
| 873 | 9.84E-03 | 4.56E-03 | 6.47E-01 | 1.60E+00 | 7.41E-01 | (0.00294,0.0348]   | (1.34,14.9]  | (0.000255,0.0184] | (0.192,21] |
| 874 | 1.45E-02 | 1.24E-02 | NA       | 1.03E+00 | 8.78E-01 | NA                 | NA           | NA                | NA         |
| 875 | 1.45E-03 | 0.00E+00 | NA       | 8.71E-01 | 0.00E+00 | NA                 | NA           | NA                | NA         |
| 876 | 2.89E-03 | 7.73E-03 | NA       | 8.30E-01 | 2.22E+00 | NA                 | NA           | NA                | NA         |
| 877 | 2.44E-03 | 2.18E-03 | NA       | 5.99E-01 | 5.36E-01 | NA                 | NA           | NA                | NA         |
| 878 | 1.44E-03 | 0.00E+00 | NA       | 7.60E-01 | 0.00E+00 | NA                 | NA           | NA                | NA         |
| 879 | 4.63E-03 | 6.56E-03 | 4.18E-01 | 1.20E+00 | 1.70E+00 | (0.00294,0.0348]   | (1.34,14.9]  | (0.000255,0.0184] | (0.192,21] |
| 880 | 3.08E-03 | 6.45E-03 | NA       | 6.28E-01 | 1.32E+00 | NA                 | NA           | NA                | NA         |
| 881 | 2.73E-03 | 1.92E-03 | NA       | 1.04E+00 | 7.31E-01 | NA                 | NA           | NA                | NA         |
| 882 | 6.13E-03 | 1.63E-03 | Inf      | 6.99E-01 | 1.86E-01 | NA                 | NA           | (0.000255,0.0184] | (0.192,21] |
| 883 | 0.00E+00 | 1.08E-03 | NA       | 5.26E-01 | Inf      | NA                 | NA           | NA                | NA         |
| 884 | 4.98E-03 | 1.57E-03 | NA       | 8.80E-01 | 2.77E-01 | NA                 | NA           | NA                | NA         |
| 885 | 4.24E-03 | 5.22E-03 | NA       | 9.26E-01 | 1.14E+00 | NA                 | NA           | NA                | NA         |
| 886 | 1.77E-02 | 6.28E-03 | NA       | 1.31E+00 | 4.64E-01 | NA                 | NA           | NA                | NA         |
| 887 | 2.69E-04 | 3.92E-04 | NA       | 1.01E+00 | 1.47E+00 | NA                 | NA           | NA                | NA         |
| 888 | 3.74E-03 | 5.57E-03 | NA       | 5.39E-01 | 8.03E-01 | NA                 | NA           | NA                | NA         |
| 889 | 4.15E-03 | 4.24E-03 | 3.06E+02 | 9.00E-01 | 9.19E-01 | (4.25e-05,0.00294] | (0,0.101]    | (0.0184,Inf]      | (21,Inf]   |
| 890 | NA       | NA       | NA       | 9.03E-01 | NA       | NA                 | NA           | NA                | NA         |
| 891 | 4.58E-03 | 3.54E-03 | NA       | 8.63E-01 | 6.68E-01 | NA                 | NA           | NA                | NA         |
| 892 | NA       | NA       | NA       | 1.32E+00 | NA       | NA                 | NA           | NA                | NA         |
| 893 | NA       | NA       | NA       | 1.74E+00 | NA       | NA                 | NA           | NA                | NA         |
| 894 | 1.77E-02 | 1.12E-02 | NA       | 1.42E+00 | 8.94E-01 | NA                 | NA           | NA                | NA         |
| 895 | 6.94E-03 | 2.47E-03 | NA       | 9.47E-01 | 3.37E-01 | NA                 | NA           | NA                | NA         |
| 896 | 5.78E-03 | 2.96E-03 | 0.00E+00 | 8.70E-01 | 4.47E-01 | (0.00294,0.0348]   | (1.34,14.9]  | NA                | NA         |
| 897 | 8.49E-03 | 0.00E+00 | NA       | 1.12E+00 | 0.00E+00 | NA                 | NA           | NA                | NA         |
| 898 | 2.26E-03 | 1.83E-03 | NA       | 9.25E-01 | 7.49E-01 | NA                 | NA           | NA                | NA         |
| 899 | 1.41E-03 | 1.20E-03 | NA       | 7.18E-01 | 6.12E-01 | NA                 | NA           | NA                | NA         |
| 900 | 6.97E-04 | 1.72E-03 | NA       | 9.55E-01 | 2.36E+00 | NA                 | NA           | NA                | NA         |
| 901 | 1.84E-03 | 5.33E-04 | NA       | 5.91E-01 | 1.72E-01 | NA                 | NA           | NA                | NA         |
| 902 | 2.70E-03 | 0.00E+00 | NA       | 1.06E+00 | 0.00E+00 | NA                 | NA           | NA                | NA         |
| 903 | 5.77E-03 | 7.56E-03 | 0.00E+00 | 9.97E-01 | 1.31E+00 | (4.25e-05,0.00294] | (0.101,1.34] | NA                | NA         |
| 904 | 5.26E-04 | 5.36E-04 | NA       | 8.67E-01 | 8.84E-01 | NA                 | NA           | NA                | NA         |
| 905 | 8.48E-03 | 1.70E-02 | 3.03E-02 | 1.29E+00 | 2.59E+00 | (0.0348,Inf]       | (14.9,Inf]   | (0.000255,0.0184] | (0.192,21] |
| 906 | 7.74E-03 | 1.80E-03 | NA       | 1.36E+00 | 3.16E-01 | NA                 | NA           | NA                | NA         |
| 907 | 2.93E-03 | 4.53E-03 | NA       | 1.32E+00 | 2.04E+00 | NA                 | NA           | NA                | NA         |
| 908 | 5.17E-04 | 7.19E-04 | NA       | 9.84E-01 | 1.37E+00 | NA                 | NA           | NA                | NA         |



|     |          |          |          |          |          |                    |              |                   |            |
|-----|----------|----------|----------|----------|----------|--------------------|--------------|-------------------|------------|
| 909 | 3.05E-03 | 3.11E-03 | NA       | 7.32E-01 | 7.48E-01 | NA                 | NA           | NA                | NA         |
| 910 | 5.63E-04 | 5.65E-03 | NA       | 7.25E-01 | 7.28E+00 | NA                 | NA           | NA                | NA         |
| 911 | 6.94E-03 | 8.48E-03 | NA       | 7.55E-01 | 9.23E-01 | NA                 | NA           | NA                | NA         |
| 912 | 9.09E-04 | 0.00E+00 | NA       | 1.06E+00 | 0.00E+00 | NA                 | NA           | NA                | NA         |
| 913 | 0.00E+00 | 2.81E-04 | 0.00E+00 | 1.11E+01 | Inf      | (0.0348,Inf]       | (14.9,Inf]   | NA                | NA         |
| 914 | 2.23E-03 | 2.09E-03 | NA       | 1.09E+00 | 1.02E+00 | NA                 | NA           | NA                | NA         |
| 915 | NA       | NA       | 3.28E-01 | NA       | 1.04E+00 | NA                 | (0.101,1.34] | NA                | (0,0.192]  |
| 916 | 1.36E-03 | 0.00E+00 | NA       | 1.48E+00 | 0.00E+00 | NA                 | NA           | NA                | NA         |
| 917 | 4.17E-03 | 3.29E-03 | NA       | 9.13E-01 | 7.20E-01 | NA                 | NA           | NA                | NA         |
| 918 | 5.03E-03 | 4.01E-03 | NA       | 7.78E-01 | 6.21E-01 | NA                 | NA           | NA                | NA         |
| 919 | 1.36E-03 | 0.00E+00 | 0.00E+00 | 1.93E-01 | 0.00E+00 | (4.25e-05,0.00294] | (0.101,1.34] | NA                | NA         |
| 920 | 2.80E-03 | 0.00E+00 | Inf      | 8.35E-01 | 0.00E+00 | NA                 | NA           | (0.0184,Inf]      | (21,Inf]   |
| 921 | 9.52E-03 | 8.17E-03 | NA       | 8.36E-01 | 7.17E-01 | NA                 | NA           | NA                | NA         |
| 922 | 9.49E-03 | 2.59E-02 | 0.00E+00 | 6.18E-01 | 1.69E+00 | (0.0348,Inf]       | (1.34,14.9]  | NA                | NA         |
| 923 | 2.89E-03 | 4.45E-03 | NA       | 9.69E-01 | 1.49E+00 | NA                 | NA           | NA                | NA         |
| 924 | 2.34E-03 | 1.90E-03 | NA       | 1.03E+00 | 8.36E-01 | NA                 | NA           | NA                | NA         |
| 925 | 1.58E-02 | 7.82E-03 | NA       | 9.96E-01 | 4.94E-01 | NA                 | NA           | NA                | NA         |
| 926 | 5.70E-04 | 1.37E-03 | NA       | 7.38E-01 | 1.78E+00 | NA                 | NA           | NA                | NA         |
| 927 | 1.50E-02 | 5.40E-03 | NA       | 1.80E+00 | 6.48E-01 | NA                 | NA           | NA                | NA         |
| 928 | NA       | NA       | NA       | 8.17E-01 | NA       | NA                 | NA           | NA                | NA         |
| 929 | 1.65E-03 | 7.96E-03 | NA       | 8.28E-01 | 3.99E+00 | NA                 | NA           | NA                | NA         |
| 930 | 9.80E-03 | 6.20E-03 | NA       | 8.78E-01 | 5.56E-01 | NA                 | NA           | NA                | NA         |
| 931 | 4.44E-03 | 0.00E+00 | NA       | 9.60E-01 | 0.00E+00 | NA                 | NA           | NA                | NA         |
| 932 | 1.01E-02 | 5.20E-03 | Inf      | 8.69E-01 | 4.49E-01 | NA                 | NA           | (0.0184,Inf]      | (21,Inf]   |
| 933 | 1.32E-02 | 5.51E-03 | 1.47E+00 | 1.19E+00 | 4.99E-01 | (0.00294,0.0348]   | (1.34,14.9]  | (0.0184,Inf]      | (0.192,21] |
| 934 | 5.69E-03 | 0.00E+00 | NA       | 1.05E+00 | 0.00E+00 | NA                 | NA           | NA                | NA         |
| 935 | 2.35E-03 | 3.75E-04 | NA       | 7.15E-01 | 1.14E-01 | NA                 | NA           | NA                | NA         |
| 936 | 5.47E-03 | 1.08E-03 | NA       | 8.22E-01 | 1.63E-01 | NA                 | NA           | NA                | NA         |
| 937 | 5.42E-03 | 4.39E-04 | 0.00E+00 | 8.88E-01 | 7.19E-02 | (0.00294,0.0348]   | (1.34,14.9]  | NA                | NA         |
| 938 | 1.52E-02 | 2.49E-03 | NA       | 1.44E+00 | 2.36E-01 | NA                 | NA           | NA                | NA         |
| 939 | 7.53E-03 | 0.00E+00 | NA       | 8.93E-01 | 0.00E+00 | NA                 | NA           | NA                | NA         |
| 940 | 5.53E-03 | 9.97E-03 | NA       | 8.70E-01 | 1.57E+00 | NA                 | NA           | NA                | NA         |
| 941 | 2.07E-02 | 3.38E-02 | NA       | 5.25E-01 | 8.58E-01 | NA                 | NA           | NA                | NA         |
| 942 | 1.15E-03 | 5.00E-03 | Inf      | 6.32E-01 | 2.75E+00 | NA                 | NA           | (0.000255,0.0184] | (0.192,21] |
| 943 | 1.33E-02 | 4.67E-03 | 5.59E-01 | 1.60E+00 | 5.64E-01 | (0.0348,Inf]       | (1.34,14.9]  | (0.0184,Inf]      | (0.192,21] |
| 944 | 7.92E-03 | 1.01E-02 | 3.63E+00 | 1.03E+00 | 1.32E+00 | (4.25e-05,0.00294] | (0.101,1.34] | (0.000255,0.0184] | (0.192,21] |
| 945 | 3.58E-03 | 0.00E+00 | NA       | 1.11E+00 | 0.00E+00 | NA                 | NA           | NA                | NA         |
| 946 | 5.13E-03 | 8.36E-04 | NA       | 9.12E-01 | 1.48E-01 | NA                 | NA           | NA                | NA         |

|     |          |          |          |          |          |                    |              |                   |            |
|-----|----------|----------|----------|----------|----------|--------------------|--------------|-------------------|------------|
| 947 | 5.16E-03 | 5.75E-03 | 4.53E-01 | 6.63E-01 | 7.40E-01 | (0.0348,Inf]       | (1.34,14.9]  | (0.0184,Inf]      | (0.192,21] |
| 948 | 5.86E-03 | 3.46E-03 | NA       | 6.26E-01 | 3.69E-01 | NA                 | NA           | NA                | NA         |
| 949 | 1.36E-03 | 9.53E-04 | NA       | 1.29E+00 | 9.07E-01 | NA                 | NA           | NA                | NA         |
| 950 | 4.04E-03 | 2.33E-03 | NA       | 1.46E+00 | 8.47E-01 | NA                 | NA           | NA                | NA         |
| 951 | 2.58E-03 | 0.00E+00 | Inf      | 8.00E-01 | 0.00E+00 | NA                 | NA           | (0.0184,Inf]      | (21,Inf]   |
| 952 | 7.46E-03 | 5.05E-03 | 3.95E-02 | 8.86E-01 | 6.00E-01 | (0.0348,Inf]       | (1.34,14.9]  | (0.000255,0.0184] | (0.192,21] |
| 953 | 7.74E-03 | 8.24E-04 | 0.00E+00 | 1.06E+00 | 1.13E-01 | (0.00294,0.0348]   | (0.101,1.34] | NA                | NA         |
| 954 | NA       | NA       | NA       | 9.36E-01 | NA       | NA                 | NA           | NA                | NA         |
| 955 | 2.83E-03 | 8.07E-03 | 0.00E+00 | 1.04E+00 | 2.96E+00 | (0.00294,0.0348]   | (1.34,14.9]  | NA                | NA         |
| 956 | 1.23E-02 | 1.45E-02 | NA       | 1.03E+00 | 1.21E+00 | NA                 | NA           | NA                | NA         |
| 957 | 3.74E-03 | 1.56E-03 | NA       | 1.28E+00 | 5.35E-01 | NA                 | NA           | NA                | NA         |
| 958 | 2.46E-02 | 1.02E-02 | NA       | 9.79E-01 | 4.04E-01 | NA                 | NA           | NA                | NA         |
| 959 | 0.00E+00 | 0.00E+00 | NA       | 8.68E-01 | NA       | NA                 | NA           | NA                | NA         |
| 960 | 1.61E-02 | 8.72E-03 | 9.14E-02 | 7.67E-01 | 4.16E-01 | (0.00294,0.0348]   | (0.101,1.34] | (0.000255,0.0184] | (0,0.192]  |
| 961 | 1.65E-03 | 1.66E-03 | NA       | 8.32E-01 | 8.35E-01 | NA                 | NA           | NA                | NA         |
| 962 | 1.40E-03 | 6.75E-03 | 0.00E+00 | 8.39E-01 | 4.05E+00 | (4.25e-05,0.00294] | (0.101,1.34] | NA                | NA         |
| 963 | 5.15E-03 | 1.33E-02 | NA       | 9.24E-01 | 2.39E+00 | NA                 | NA           | NA                | NA         |
| 964 | 1.34E-02 | 0.00E+00 | 0.00E+00 | 9.72E-01 | 0.00E+00 | (0.00294,0.0348]   | (1.34,14.9]  | NA                | NA         |
| 965 | 1.44E-02 | 2.01E-02 | NA       | 7.30E-01 | 1.02E+00 | NA                 | NA           | NA                | NA         |
| 966 | 1.96E-03 | 1.97E-03 | NA       | 9.51E-01 | 9.52E-01 | NA                 | NA           | NA                | NA         |
| 967 | 8.90E-03 | 1.10E-02 | NA       | 6.43E-01 | 7.98E-01 | NA                 | NA           | NA                | NA         |
| 968 | 1.25E-03 | 4.46E-03 | NA       | 8.48E-01 | 3.04E+00 | NA                 | NA           | NA                | NA         |
| 969 | 5.64E-03 | 3.29E-04 | NA       | 9.44E-01 | 5.50E-02 | NA                 | NA           | NA                | NA         |
| 970 | 4.64E-03 | 4.35E-03 | 1.34E+00 | 8.75E-01 | 8.20E-01 | (0.00294,0.0348]   | (0.101,1.34] | (0.000255,0.0184] | (0.192,21] |
| 971 | NA       | NA       | NA       | 7.77E-01 | NA       | NA                 | NA           | NA                | NA         |
| 972 | 5.30E-03 | 0.00E+00 | NA       | 8.45E-01 | 0.00E+00 | NA                 | NA           | NA                | NA         |
| 973 | 1.69E-02 | 2.80E-02 | NA       | 8.16E-01 | 1.35E+00 | NA                 | NA           | NA                | NA         |
| 974 | 1.69E-02 | 8.65E-03 | 8.11E-01 | 9.48E-01 | 4.84E-01 | (0.00294,0.0348]   | (0.101,1.34] | (0.000255,0.0184] | (0.192,21] |
| 975 | 0.00E+00 | 7.82E-03 | NA       | 7.86E-01 | Inf      | NA                 | NA           | NA                | NA         |
| 976 | 3.41E-03 | 5.77E-03 | NA       | 8.58E-01 | 1.45E+00 | NA                 | NA           | NA                | NA         |
| 977 | 2.08E-02 | 4.19E-03 | 1.41E+00 | 2.07E+00 | 4.18E-01 | (0.0348,Inf]       | (1.34,14.9]  | (0.0184,Inf]      | (0.192,21] |
| 978 | 6.21E-03 | 4.37E-03 | NA       | 7.38E-01 | 5.19E-01 | NA                 | NA           | NA                | NA         |
| 979 | 1.85E-02 | 1.42E-02 | NA       | 9.08E-01 | 6.97E-01 | NA                 | NA           | NA                | NA         |
| 980 | 4.04E-03 | 2.78E-03 | NA       | 1.23E+00 | 8.42E-01 | NA                 | NA           | NA                | NA         |
| 981 | NA       | NA       | NA       | 9.72E-01 | NA       | NA                 | NA           | NA                | NA         |
| 982 | 0.00E+00 | 0.00E+00 | NA       | 8.54E-01 | NA       | NA                 | NA           | NA                | NA         |
| 983 | 5.13E-03 | 3.99E-03 | NA       | 1.16E+00 | 9.05E-01 | NA                 | NA           | NA                | NA         |
| 984 | 0.00E+00 | 0.00E+00 | NA       | 9.32E-01 | NA       | NA                 | NA           | NA                | NA         |

|      |          |          |          |          |          |                    |              |                   |            |
|------|----------|----------|----------|----------|----------|--------------------|--------------|-------------------|------------|
| 985  | 3.31E-03 | 0.00E+00 | NA       | 8.23E-01 | 0.00E+00 | NA                 | NA           | NA                | NA         |
| 986  | 3.94E-03 | 3.69E-04 | 7.20E-01 | 1.02E+00 | 9.60E-02 | (0.0348,Inf]       | (1.34,14.9]  | (0.0184,Inf]      | (21,Inf]   |
| 987  | 8.47E-03 | 1.19E-03 | 0.00E+00 | 9.69E-01 | 1.36E-01 | (4.25e-05,0.00294] | (0.101,1.34] | NA                | NA         |
| 988  | 7.85E-04 | 1.94E-03 | NA       | 6.01E-01 | 1.49E+00 | NA                 | NA           | NA                | NA         |
| 989  | 3.63E-03 | 9.41E-03 | NA       | 6.96E-01 | 1.80E+00 | NA                 | NA           | NA                | NA         |
| 990  | 1.34E-02 | 0.00E+00 | NA       | 1.59E+00 | 0.00E+00 | NA                 | NA           | NA                | NA         |
| 991  | 1.57E-03 | 2.03E-02 | 5.83E-02 | 1.04E+00 | 1.35E+01 | (0.0348,Inf]       | (14.9,Inf]   | (0.0184,Inf]      | (0.192,21] |
| 992  | 5.28E-03 | 1.05E-03 | NA       | 8.44E-01 | 1.67E-01 | NA                 | NA           | NA                | NA         |
| 993  | 1.18E-02 | 4.00E-03 | NA       | 1.16E+00 | 3.92E-01 | NA                 | NA           | NA                | NA         |
| 994  | 5.88E-04 | 4.69E-04 | NA       | 7.92E-01 | 6.31E-01 | NA                 | NA           | NA                | NA         |
| 995  | 0.00E+00 | 1.63E-02 | NA       | 7.06E-01 | Inf      | NA                 | NA           | NA                | NA         |
| 996  | NA       | NA       | NA       | 7.87E-01 | NA       | NA                 | NA           | NA                | NA         |
| 997  | 0.00E+00 | 3.09E-03 | NA       | 1.10E+00 | Inf      | NA                 | NA           | NA                | NA         |
| 998  | 6.33E-03 | 4.32E-03 | NA       | 8.30E-01 | 5.65E-01 | NA                 | NA           | NA                | NA         |
| 999  | 4.14E-03 | 4.95E-03 | NA       | 9.24E-01 | 1.10E+00 | NA                 | NA           | NA                | NA         |
| 1000 | 2.40E-03 | 3.47E-03 | NA       | 6.68E-01 | 9.65E-01 | NA                 | NA           | NA                | NA         |
| 1001 | 0.00E+00 | 6.43E-04 | NA       | 9.09E-01 | Inf      | NA                 | NA           | NA                | NA         |
| 1002 | 8.40E-03 | 6.50E-03 | NA       | 7.95E-01 | 6.15E-01 | NA                 | NA           | NA                | NA         |
| 1003 | 0.00E+00 | 3.36E-03 | NA       | 7.34E-01 | Inf      | NA                 | NA           | NA                | NA         |
| 1004 | 5.97E-03 | 2.37E-03 | NA       | 1.16E+00 | 4.61E-01 | NA                 | NA           | NA                | NA         |
| 1005 | NA       | NA       | NA       | 5.41E-01 | NA       | NA                 | NA           | NA                | NA         |
| 1006 | 3.04E-03 | 0.00E+00 | 0.00E+00 | 7.58E-01 | 0.00E+00 | (0.00294,0.0348]   | (1.34,14.9]  | NA                | NA         |
| 1007 | 1.19E-02 | 4.13E-03 | 3.78E+00 | 1.06E+00 | 3.66E-01 | (4.25e-05,0.00294] | (0.101,1.34] | (0.000255,0.0184] | (0.192,21] |
| 1008 | 4.37E-03 | 1.11E-03 | NA       | 1.48E+00 | 3.75E-01 | NA                 | NA           | NA                | NA         |
| 1009 | 2.04E-03 | 0.00E+00 | NA       | 1.38E+00 | 0.00E+00 | NA                 | NA           | NA                | NA         |
| 1010 | 4.46E-03 | 6.93E-03 | NA       | 8.49E-01 | 1.32E+00 | NA                 | NA           | NA                | NA         |
| 1011 | 8.36E-03 | 0.00E+00 | NA       | 1.08E+00 | 0.00E+00 | NA                 | NA           | NA                | NA         |
| 1012 | NA       | NA       | NA       | 5.99E-01 | NA       | NA                 | NA           | NA                | NA         |
| 1013 | 1.21E-03 | 2.02E-03 | NA       | 1.24E+00 | 2.08E+00 | NA                 | NA           | NA                | NA         |
| 1014 | NA       | NA       | NA       | 1.07E+00 | NA       | NA                 | NA           | NA                | NA         |
| 1015 | 1.71E-03 | 1.80E-03 | NA       | 9.90E-01 | 1.04E+00 | NA                 | NA           | NA                | NA         |
| 1016 | 0.00E+00 | 9.94E-04 | NA       | 7.54E-01 | Inf      | NA                 | NA           | NA                | NA         |
| 1017 | 2.00E-03 | 0.00E+00 | NA       | 6.46E-01 | 0.00E+00 | NA                 | NA           | NA                | NA         |
| 1018 | 5.16E-03 | 1.67E-03 | NA       | 9.98E-01 | 3.23E-01 | NA                 | NA           | NA                | NA         |
| 1019 | 2.19E-03 | 7.83E-03 | 0.00E+00 | 5.17E-01 | 1.85E+00 | (0.00294,0.0348]   | (1.34,14.9]  | NA                | NA         |
| 1020 | NA       | NA       | NA       | 5.78E-01 | NA       | NA                 | NA           | NA                | NA         |
| 1021 | NA       | NA       | NA       | 6.49E-01 | NA       | NA                 | NA           | NA                | NA         |
| 1022 | 2.39E-03 | 2.82E-03 | NA       | 7.85E-01 | 9.27E-01 | NA                 | NA           | NA                | NA         |

|      |          |          |          |          |          |                    |             |                   |            |
|------|----------|----------|----------|----------|----------|--------------------|-------------|-------------------|------------|
| 1023 | 9.76E-03 | 1.89E-03 | NA       | 9.56E-01 | 1.85E-01 | NA                 | NA          | NA                | NA         |
| 1024 | 0.00E+00 | 0.00E+00 | NA       | 8.19E-01 | NA       | NA                 | NA          | NA                | NA         |
| 1025 | 7.83E-03 | 7.02E-03 | NA       | 9.56E-01 | 8.58E-01 | NA                 | NA          | NA                | NA         |
| 1026 | 1.28E-02 | 3.82E-03 | NA       | 8.37E-01 | 2.50E-01 | NA                 | NA          | NA                | NA         |
| 1027 | 0.00E+00 | 5.20E-04 | NA       | 1.05E+00 | Inf      | NA                 | NA          | NA                | NA         |
| 1028 | 0.00E+00 | 1.50E-03 | NA       | 7.93E-01 | Inf      | NA                 | NA          | NA                | NA         |
| 1029 | 0.00E+00 | 0.00E+00 | NA       | 1.14E+00 | NA       | NA                 | NA          | NA                | NA         |
| 1030 | 6.65E-03 | 4.53E-03 | 1.53E-01 | 9.92E-01 | 6.76E-01 | (0.00294,0.0348]   | (1.34,14.9] | (0.000255,0.0184] | (0.192,21] |
| 1031 | 3.91E-03 | 0.00E+00 | NA       | 9.90E-01 | 0.00E+00 | NA                 | NA          | NA                | NA         |
| 1032 | 1.82E-02 | 7.02E-03 | NA       | 1.10E+00 | 4.25E-01 | NA                 | NA          | NA                | NA         |
| 1033 | 4.01E-03 | 4.75E-04 | NA       | 9.46E-01 | 1.12E-01 | NA                 | NA          | NA                | NA         |
| 1034 | 3.87E-03 | 1.58E-03 | NA       | 8.03E-01 | 3.28E-01 | NA                 | NA          | NA                | NA         |
| 1035 | 0.00E+00 | 0.00E+00 | Inf      | 5.00E-01 | NA       | NA                 | NA          | (0.0184,Inf]      | (21,Inf]   |
| 1036 | 6.53E-03 | 4.75E-03 | 3.21E+00 | 9.63E-01 | 7.00E-01 | (0.00294,0.0348]   | (1.34,14.9] | (0.0184,Inf]      | (0.192,21] |
| 1037 | 2.21E-03 | 0.00E+00 | NA       | 7.38E-01 | 0.00E+00 | NA                 | NA          | NA                | NA         |
| 1038 | 5.46E-03 | 1.53E-02 | NA       | 1.15E+00 | 3.22E+00 | NA                 | NA          | NA                | NA         |
| 1039 | 4.15E-03 | 1.24E-02 | 0.00E+00 | 7.13E-01 | 2.13E+00 | (0.00294,0.0348]   | (1.34,14.9] | NA                | NA         |
| 1040 | 0.00E+00 | 4.17E-03 | NA       | 9.15E-01 | Inf      | NA                 | NA          | NA                | NA         |
| 1041 | 1.28E-02 | 1.82E-02 | 1.44E+00 | 9.71E-01 | 1.38E+00 | (0.0348,Inf]       | (14.9,Inf]  | (0.0184,Inf]      | (21,Inf]   |
| 1042 | 8.23E-03 | 4.55E-03 | NA       | 1.28E+00 | 7.07E-01 | NA                 | NA          | NA                | NA         |
| 1043 | 0.00E+00 | 1.16E-03 | NA       | 8.94E-01 | Inf      | NA                 | NA          | NA                | NA         |
| 1044 | 1.52E-02 | 1.36E-02 | 0.00E+00 | 1.26E+00 | 1.13E+00 | (0.0348,Inf]       | (1.34,14.9] | NA                | NA         |
| 1045 | 4.73E-03 | 4.23E-03 | NA       | 9.69E-01 | 8.67E-01 | NA                 | NA          | NA                | NA         |
| 1046 | 5.15E-03 | 2.02E-03 | Inf      | 1.39E+00 | 5.47E-01 | NA                 | NA          | (0.000255,0.0184] | (0.192,21] |
| 1047 | 4.31E-03 | 0.00E+00 | NA       | 4.73E-01 | 0.00E+00 | NA                 | NA          | NA                | NA         |
| 1048 | 0.00E+00 | 0.00E+00 | NA       | 9.60E-01 | NA       | NA                 | NA          | NA                | NA         |
| 1049 | 1.10E-02 | 6.17E-03 | NA       | 1.31E+00 | 7.34E-01 | NA                 | NA          | NA                | NA         |
| 1050 | 8.69E-03 | 1.03E-03 | NA       | 1.09E+00 | 1.30E-01 | NA                 | NA          | NA                | NA         |
| 1051 | 2.89E-03 | 2.04E-03 | NA       | 1.16E+00 | 8.22E-01 | NA                 | NA          | NA                | NA         |
| 1052 | 9.85E-03 | 3.17E-02 | NA       | 1.24E+00 | 3.99E+00 | NA                 | NA          | NA                | NA         |
| 1053 | 1.81E-02 | 8.52E-03 | NA       | 1.07E+00 | 5.06E-01 | NA                 | NA          | NA                | NA         |
| 1054 | 1.38E-02 | 6.43E-04 | NA       | 1.25E+00 | 5.80E-02 | NA                 | NA          | NA                | NA         |
| 1055 | 1.12E-02 | 1.55E-02 | NA       | 5.99E-01 | 8.28E-01 | NA                 | NA          | NA                | NA         |
| 1056 | 0.00E+00 | 0.00E+00 | NA       | 5.44E-01 | NA       | NA                 | NA          | NA                | NA         |
| 1057 | 1.44E-02 | 1.78E-03 | NA       | 1.30E+00 | 1.60E-01 | NA                 | NA          | NA                | NA         |
| 1058 | 0.00E+00 | 1.25E-03 | NA       | 1.14E+00 | Inf      | NA                 | NA          | NA                | NA         |
| 1059 | 9.12E-04 | 5.94E-03 | 0.00E+00 | 1.35E+00 | 8.80E+00 | (4.25e-05,0.00294] | (1.34,14.9] | NA                | NA         |
| 1060 | 5.05E-03 | 2.46E-03 | NA       | 8.62E-01 | 4.20E-01 | NA                 | NA          | NA                | NA         |

|      |          |          |          |          |          |                    |              |                   |            |
|------|----------|----------|----------|----------|----------|--------------------|--------------|-------------------|------------|
| 1061 | 0.00E+00 | 0.00E+00 | 0.00E+00 | 7.33E-01 | NA       | (0.00294,0.0348]   | (14.9,Inf]   | NA                | NA         |
| 1062 | 4.44E-03 | 6.31E-03 | 0.00E+00 | 5.01E-01 | 7.12E-01 | (4.25e-05,0.00294] | (0.101,1.34] | NA                | NA         |
| 1063 | 2.98E-03 | 1.33E-03 | NA       | 8.90E-01 | 3.96E-01 | NA                 | NA           | NA                | NA         |
| 1064 | 1.40E-02 | 1.84E-03 | 2.85E+02 | 1.39E+00 | 1.84E-01 | (0.00294,0.0348]   | (0.101,1.34] | (0.0184,Inf]      | (21,Inf]   |
| 1065 | NA       | NA       | NA       | 6.47E-01 | NA       | NA                 | NA           | NA                | NA         |
| 1066 | 6.65E-03 | 5.32E-03 | NA       | 7.66E-01 | 6.13E-01 | NA                 | NA           | NA                | NA         |
| 1067 | 1.12E-02 | 1.05E-02 | NA       | 1.94E+00 | 1.81E+00 | NA                 | NA           | NA                | NA         |
| 1068 | 1.14E-02 | 6.65E-03 | NA       | 8.77E-01 | 5.13E-01 | NA                 | NA           | NA                | NA         |
| 1069 | 4.32E-03 | 0.00E+00 | NA       | 7.42E-01 | 0.00E+00 | NA                 | NA           | NA                | NA         |
| 1070 | 8.35E-03 | 7.72E-03 | NA       | 9.78E-01 | 9.04E-01 | NA                 | NA           | NA                | NA         |
| 1071 | NA       | NA       | NA       | 7.65E-01 | NA       | NA                 | NA           | NA                | NA         |
| 1072 | 0.00E+00 | 0.00E+00 | NA       | 1.11E+00 | NA       | NA                 | NA           | NA                | NA         |
| 1073 | NA       | NA       | NA       | 6.28E-01 | NA       | NA                 | NA           | NA                | NA         |
| 1074 | 2.86E-03 | 1.06E-03 | NA       | 7.40E-01 | 2.75E-01 | NA                 | NA           | NA                | NA         |
| 1075 | 1.33E-02 | 2.05E-02 | NA       | 7.11E-01 | 1.10E+00 | NA                 | NA           | NA                | NA         |
| 1076 | 6.58E-03 | 1.49E-03 | NA       | 8.92E-01 | 2.03E-01 | NA                 | NA           | NA                | NA         |
| 1077 | NA       | NA       | NA       | 1.54E+00 | NA       | NA                 | NA           | NA                | NA         |
| 1078 | 0.00E+00 | 6.32E-03 | NA       | 1.01E+00 | Inf      | NA                 | NA           | NA                | NA         |
| 1079 | NA       | NA       | NA       | 7.46E-01 | NA       | NA                 | NA           | NA                | NA         |
| 1080 | 8.02E-03 | 0.00E+00 | NA       | 1.73E+00 | 0.00E+00 | NA                 | NA           | NA                | NA         |
| 1081 | 1.92E-03 | 0.00E+00 | NA       | 6.92E-01 | 0.00E+00 | NA                 | NA           | NA                | NA         |
| 1082 | 1.94E-03 | 7.78E-03 | NA       | 4.24E-01 | 1.70E+00 | NA                 | NA           | NA                | NA         |
| 1083 | 3.64E-03 | 0.00E+00 | NA       | 6.19E-01 | 0.00E+00 | NA                 | NA           | NA                | NA         |
| 1084 | NA       | NA       | NA       | 1.18E+00 | NA       | NA                 | NA           | NA                | NA         |
| 1085 | 3.08E-03 | 7.60E-03 | 0.00E+00 | 9.59E-01 | 2.36E+00 | (0.0348,Inf]       | (14.9,Inf]   | NA                | NA         |
| 1086 | 1.30E-02 | 1.67E-02 | 2.21E-01 | 9.39E-01 | 1.21E+00 | (0.00294,0.0348]   | (1.34,14.9]  | (0.000255,0.0184] | (0.192,21] |
| 1087 | 9.14E-04 | 1.90E-03 | NA       | 1.19E+00 | 2.46E+00 | NA                 | NA           | NA                | NA         |
| 1088 | 1.36E-02 | 4.20E-03 | NA       | 9.44E-01 | 2.93E-01 | NA                 | NA           | NA                | NA         |
| 1089 | 1.37E-02 | 1.40E-02 | 1.83E-01 | 1.42E+00 | 1.45E+00 | (0.0348,Inf]       | (1.34,14.9]  | (0.0184,Inf]      | (0.192,21] |
| 1090 | 2.90E-03 | 1.16E-02 | 0.00E+00 | 9.75E-01 | 3.89E+00 | (0.00294,0.0348]   | (1.34,14.9]  | NA                | NA         |
| 1091 | 1.15E-02 | 8.89E-03 | NA       | 7.44E-01 | 5.74E-01 | NA                 | NA           | NA                | NA         |
| 1092 | 6.73E-04 | 0.00E+00 | NA       | 4.56E-01 | 0.00E+00 | NA                 | NA           | NA                | NA         |
| 1093 | 1.26E-02 | 1.06E-02 | NA       | 9.31E-01 | 7.81E-01 | NA                 | NA           | NA                | NA         |
| 1094 | 8.71E-03 | 0.00E+00 | NA       | 1.05E+00 | 0.00E+00 | NA                 | NA           | NA                | NA         |
| 1095 | 0.00E+00 | 3.10E-03 | NA       | 1.13E+00 | Inf      | NA                 | NA           | NA                | NA         |
| 1096 | 1.05E-03 | 0.00E+00 | NA       | 6.50E-01 | 0.00E+00 | NA                 | NA           | NA                | NA         |
| 1097 | 1.21E-02 | 1.48E-03 | Inf      | 7.00E-01 | 8.56E-02 | NA                 | NA           | (0.0184,Inf]      | (21,Inf]   |
| 1098 | 6.22E-03 | 1.08E-03 | NA       | 8.39E-01 | 1.46E-01 | NA                 | NA           | NA                | NA         |

|      |          |          |          |          |          |                  |              |              |            |
|------|----------|----------|----------|----------|----------|------------------|--------------|--------------|------------|
| 1099 | 1.69E-02 | 6.77E-03 | Inf      | 2.49E+00 | 9.99E-01 | NA               | NA           | (0.0184,Inf] | (21,Inf]   |
| 1100 | 0.00E+00 | 1.16E-02 | NA       | 6.45E-01 | Inf      | NA               | NA           | NA           | NA         |
| 1101 | 1.35E-02 | 1.09E-02 | 0.00E+00 | 9.98E-01 | 8.07E-01 | (0.0348,Inf]     | (1.34,14.9]  | NA           | NA         |
| 1102 | 8.77E-03 | 5.07E-03 | NA       | 6.21E-01 | 3.59E-01 | NA               | NA           | NA           | NA         |
| 1103 | 1.12E-02 | 0.00E+00 | NA       | 1.18E+00 | 0.00E+00 | NA               | NA           | NA           | NA         |
| 1104 | 1.38E-02 | 2.76E-03 | NA       | 8.48E-01 | 1.69E-01 | NA               | NA           | NA           | NA         |
| 1105 | 6.16E-03 | 2.44E-03 | NA       | 1.03E+00 | 4.10E-01 | NA               | NA           | NA           | NA         |
| 1106 | 5.04E-03 | 4.27E-03 | NA       | 9.69E-01 | 8.22E-01 | NA               | NA           | NA           | NA         |
| 1107 | 5.39E-03 | 1.02E-02 | NA       | 9.20E-01 | 1.74E+00 | NA               | NA           | NA           | NA         |
| 1108 | 9.16E-02 | 1.44E-02 | NA       | 3.32E+00 | 5.23E-01 | NA               | NA           | NA           | NA         |
| 1109 | 6.53E-03 | 0.00E+00 | NA       | 9.71E-01 | 0.00E+00 | NA               | NA           | NA           | NA         |
| 1110 | 4.84E-02 | 1.85E-02 | NA       | 1.70E+00 | 6.51E-01 | NA               | NA           | NA           | NA         |
| 1111 | 1.58E-02 | 0.00E+00 | NA       | 9.44E-01 | 0.00E+00 | NA               | NA           | NA           | NA         |
| 1112 | 6.06E-04 | 1.24E-03 | NA       | 1.27E+00 | 2.60E+00 | NA               | NA           | NA           | NA         |
| 1113 | 0.00E+00 | 4.04E-04 | NA       | 9.95E-01 | Inf      | NA               | NA           | NA           | NA         |
| 1114 | 1.82E-03 | 9.62E-03 | NA       | 7.84E-01 | 4.14E+00 | NA               | NA           | NA           | NA         |
| 1115 | 0.00E+00 | 4.69E-03 | NA       | 4.98E-01 | Inf      | NA               | NA           | NA           | NA         |
| 1116 | 1.51E-03 | 8.76E-04 | NA       | 6.64E-01 | 3.84E-01 | NA               | NA           | NA           | NA         |
| 1117 | 3.24E-02 | 0.00E+00 | NA       | 8.14E-01 | 0.00E+00 | NA               | NA           | NA           | NA         |
| 1118 | 0.00E+00 | 6.68E-04 | NA       | 7.59E-01 | Inf      | NA               | NA           | NA           | NA         |
| 1119 | 9.44E-03 | 6.90E-04 | NA       | 8.04E-01 | 5.88E-02 | NA               | NA           | NA           | NA         |
| 1120 | 0.00E+00 | 3.76E-02 | 0.00E+00 | 1.22E+00 | Inf      | (0.0348,Inf]     | (14.9,Inf]   | NA           | NA         |
| 1121 | 1.55E-02 | 9.52E-03 | 9.43E-01 | 9.15E-01 | 5.62E-01 | (0.0348,Inf]     | (1.34,14.9]  | (0.0184,Inf] | (0.192,21] |
| 1122 | 1.69E-03 | 3.78E-03 | NA       | 7.08E-01 | 1.58E+00 | NA               | NA           | NA           | NA         |
| 1123 | 9.57E-03 | 3.54E-03 | NA       | 1.99E-01 | 7.36E-02 | NA               | NA           | NA           | NA         |
| 1124 | NA       | NA       | NA       | 8.71E-01 | NA       | NA               | NA           | NA           | NA         |
| 1125 | 1.99E-02 | 7.03E-03 | NA       | 1.19E+00 | 4.21E-01 | NA               | NA           | NA           | NA         |
| 1126 | 1.42E-02 | 1.06E-02 | NA       | 1.78E+00 | 1.33E+00 | NA               | NA           | NA           | NA         |
| 1127 | NA       | NA       | 3.57E-01 | NA       | 9.01E-01 | NA               | (0.101,1.34] | NA           | (0,0.192]  |
| 1128 | 2.40E-03 | 0.00E+00 | NA       | 3.86E-01 | 0.00E+00 | NA               | NA           | NA           | NA         |
| 1129 | 1.42E-02 | 1.88E-03 | 1.24E+00 | 1.42E+00 | 1.88E-01 | (0.00294,0.0348] | (1.34,14.9]  | (0.0184,Inf] | (0.192,21] |
| 1130 | NA       | NA       | NA       | 9.24E-01 | NA       | NA               | NA           | NA           | NA         |
| 1131 | 6.22E-03 | 7.73E-03 | 0.00E+00 | 1.40E+00 | 1.75E+00 | (0.0348,Inf]     | (1.34,14.9]  | NA           | NA         |
| 1132 | 9.85E-03 | 4.20E-03 | NA       | 1.13E+00 | 4.84E-01 | NA               | NA           | NA           | NA         |
| 1133 | 3.37E-03 | 0.00E+00 | NA       | 9.86E-01 | 0.00E+00 | NA               | NA           | NA           | NA         |
| 1134 | NA       | NA       | NA       | 9.02E-01 | NA       | NA               | NA           | NA           | NA         |
| 1135 | 1.64E-02 | 1.24E-02 | NA       | 8.32E-01 | 6.31E-01 | NA               | NA           | NA           | NA         |
| 1136 | 7.48E-04 | 5.16E-03 | NA       | 1.13E+00 | 7.78E+00 | NA               | NA           | NA           | NA         |

|      |          |          |          |          |          |                    |              |              |            |
|------|----------|----------|----------|----------|----------|--------------------|--------------|--------------|------------|
| 1137 | 0.00E+00 | 1.78E-03 | NA       | 9.56E-01 | Inf      | NA                 | NA           | NA           | NA         |
| 1138 | 7.62E-03 | 1.52E-03 | NA       | 5.95E-01 | 1.19E-01 | NA                 | NA           | NA           | NA         |
| 1139 | 3.85E-03 | 4.54E-03 | NA       | 1.43E+00 | 1.68E+00 | NA                 | NA           | NA           | NA         |
| 1140 | 0.00E+00 | 5.59E-03 | NA       | 4.55E-01 | Inf      | NA                 | NA           | NA           | NA         |
| 1141 | 9.58E-03 | 7.17E-03 | NA       | 6.26E-01 | 4.68E-01 | NA                 | NA           | NA           | NA         |
| 1142 | 3.50E-03 | 0.00E+00 | NA       | 7.05E-01 | 0.00E+00 | NA                 | NA           | NA           | NA         |
| 1143 | 1.04E-02 | 1.05E-02 | NA       | 1.95E+00 | 1.98E+00 | NA                 | NA           | NA           | NA         |
| 1144 | NA       | NA       | NA       | 1.44E+00 | NA       | NA                 | NA           | NA           | NA         |
| 1145 | 1.54E-02 | 1.40E-02 | 1.11E-01 | 9.00E-01 | 8.19E-01 | (0.0348,Inf]       | (14.9,Inf]   | (0.0184,Inf] | (0.192,21] |
| 1146 | 8.53E-03 | 2.80E-03 | NA       | 9.60E-01 | 3.15E-01 | NA                 | NA           | NA           | NA         |
| 1147 | 7.53E-03 | 7.52E-03 | NA       | 8.35E-01 | 8.34E-01 | NA                 | NA           | NA           | NA         |
| 1148 | 2.25E-02 | 1.11E-02 | 8.24E-01 | 1.11E+00 | 5.47E-01 | (0.0348,Inf]       | (1.34,14.9]  | (0.0184,Inf] | (0.192,21] |
| 1149 | 0.00E+00 | 2.32E-03 | NA       | 7.51E-01 | Inf      | NA                 | NA           | NA           | NA         |
| 1150 | 6.37E-03 | 1.73E-03 | NA       | 6.20E-01 | 1.69E-01 | NA                 | NA           | NA           | NA         |
| 1151 | 2.50E-04 | 9.79E-04 | NA       | 4.44E-01 | 1.74E+00 | NA                 | NA           | NA           | NA         |
| 1152 | 6.08E-03 | 4.36E-03 | NA       | 6.79E-01 | 4.88E-01 | NA                 | NA           | NA           | NA         |
| 1153 | 8.59E-03 | 0.00E+00 | NA       | 8.31E-01 | 0.00E+00 | NA                 | NA           | NA           | NA         |
| 1154 | NA       | NA       | NA       | 9.59E-01 | NA       | NA                 | NA           | NA           | NA         |
| 1155 | 3.78E-03 | 8.16E-03 | NA       | 7.41E-01 | 1.60E+00 | NA                 | NA           | NA           | NA         |
| 1156 | 0.00E+00 | 8.25E-03 | 0.00E+00 | 3.83E-01 | Inf      | (4.25e-05,0.00294] | (14.9,Inf]   | NA           | NA         |
| 1157 | 6.16E-03 | 0.00E+00 | NA       | 8.55E-01 | 0.00E+00 | NA                 | NA           | NA           | NA         |
| 1158 | NA       | NA       | NA       | 9.59E-01 | NA       | NA                 | NA           | NA           | NA         |
| 1159 | 0.00E+00 | 6.56E-03 | NA       | 9.82E-01 | Inf      | NA                 | NA           | NA           | NA         |
| 1160 | 1.13E-02 | 0.00E+00 | NA       | 1.11E+00 | 0.00E+00 | NA                 | NA           | NA           | NA         |
| 1161 | 0.00E+00 | 1.53E-02 | NA       | 3.28E-01 | Inf      | NA                 | NA           | NA           | NA         |
| 1162 | NA       | NA       | NA       | 1.05E+00 | NA       | NA                 | NA           | NA           | NA         |
| 1163 | 5.20E-03 | 4.85E-03 | NA       | 6.94E-01 | 6.47E-01 | NA                 | NA           | NA           | NA         |
| 1164 | 2.93E-03 | 0.00E+00 | NA       | 6.56E-01 | 0.00E+00 | NA                 | NA           | NA           | NA         |
| 1165 | 8.50E-03 | 8.35E-03 | Inf      | 8.61E-01 | 8.46E-01 | NA                 | NA           | (0.0184,Inf] | (0.192,21] |
| 1166 | 3.57E-03 | 0.00E+00 | NA       | 7.86E-01 | 0.00E+00 | NA                 | NA           | NA           | NA         |
| 1167 | 0.00E+00 | 0.00E+00 | NA       | 7.18E-01 | NA       | NA                 | NA           | NA           | NA         |
| 1168 | 2.48E-02 | 0.00E+00 | NA       | 1.23E+00 | 0.00E+00 | NA                 | NA           | NA           | NA         |
| 1169 | 9.66E-04 | 1.21E-03 | NA       | 7.73E-01 | 9.66E-01 | NA                 | NA           | NA           | NA         |
| 1170 | 6.60E-03 | 9.31E-03 | 2.32E+02 | 7.19E-01 | 1.01E+00 | (4.25e-05,0.00294] | (0.101,1.34] | (0.0184,Inf] | (21,Inf]   |
| 1171 | 0.00E+00 | 0.00E+00 | Inf      | 9.65E-01 | NA       | NA                 | NA           | (0.0184,Inf] | (21,Inf]   |
| 1172 | 1.08E-02 | 1.26E-02 | 0.00E+00 | 7.46E-01 | 8.75E-01 | (0.0348,Inf]       | (1.34,14.9]  | NA           | NA         |
| 1173 | 3.71E-03 | 2.15E-03 | NA       | 5.75E-01 | 3.33E-01 | NA                 | NA           | NA           | NA         |
| 1174 | 8.43E-03 | 5.24E-03 | NA       | 1.20E+00 | 7.48E-01 | NA                 | NA           | NA           | NA         |

|      |          |          |          |          |          |                  |             |                   |            |
|------|----------|----------|----------|----------|----------|------------------|-------------|-------------------|------------|
| 1175 | NA       | NA       | NA       | 4.42E-01 | NA       | NA               | NA          | NA                | NA         |
| 1176 | 2.91E-03 | 0.00E+00 | NA       | 5.09E-01 | 0.00E+00 | NA               | NA          | NA                | NA         |
| 1177 | 1.17E-02 | 0.00E+00 | NA       | 1.32E+00 | 0.00E+00 | NA               | NA          | NA                | NA         |
| 1178 | 3.85E-03 | 2.77E-03 | 0.00E+00 | 9.70E-01 | 6.98E-01 | (0.00294,0.0348] | (1.34,14.9] | NA                | NA         |
| 1179 | NA       | NA       | NA       | 9.62E-01 | NA       | NA               | NA          | NA                | NA         |
| 1180 | 2.77E-03 | 2.89E-02 | NA       | 5.97E-01 | 6.23E+00 | NA               | NA          | NA                | NA         |
| 1181 | 1.23E-03 | 0.00E+00 | NA       | 7.46E-01 | 0.00E+00 | NA               | NA          | NA                | NA         |
| 1182 | 8.56E-03 | 9.67E-03 | NA       | 1.15E+00 | 1.30E+00 | NA               | NA          | NA                | NA         |
| 1183 | 0.00E+00 | 0.00E+00 | NA       | 1.04E+00 | NA       | NA               | NA          | NA                | NA         |
| 1184 | 7.45E-03 | 1.62E-03 | 1.85E+00 | 5.99E-01 | 1.30E-01 | (0.0348,Inf]     | (1.34,14.9] | (0.0184,Inf]      | (21,Inf]   |
| 1185 | NA       | NA       | NA       | 7.03E-01 | NA       | NA               | NA          | NA                | NA         |
| 1186 | 5.31E-03 | 5.98E-03 | NA       | 1.05E+00 | 1.18E+00 | NA               | NA          | NA                | NA         |
| 1187 | 2.11E-02 | 1.31E-02 | NA       | 6.93E-01 | 4.30E-01 | NA               | NA          | NA                | NA         |
| 1188 | 2.54E-03 | 5.07E-03 | NA       | 5.74E-01 | 1.15E+00 | NA               | NA          | NA                | NA         |
| 1189 | 0.00E+00 | 0.00E+00 | NA       | 7.11E-01 | NA       | NA               | NA          | NA                | NA         |
| 1190 | 1.55E-02 | 0.00E+00 | NA       | 6.90E-01 | 0.00E+00 | NA               | NA          | NA                | NA         |
| 1191 | 0.00E+00 | 1.33E-03 | NA       | 8.07E-01 | Inf      | NA               | NA          | NA                | NA         |
| 1192 | NA       | NA       | NA       | 5.92E-01 | NA       | NA               | NA          | NA                | NA         |
| 1193 | 1.65E-02 | 1.42E-03 | NA       | 6.98E-01 | 6.02E-02 | NA               | NA          | NA                | NA         |
| 1194 | 4.83E-03 | 1.35E-02 | NA       | 6.66E-01 | 1.87E+00 | NA               | NA          | NA                | NA         |
| 1195 | 0.00E+00 | 1.82E-03 | NA       | 9.46E-01 | Inf      | NA               | NA          | NA                | NA         |
| 1196 | 0.00E+00 | 0.00E+00 | NA       | 1.10E+00 | NA       | NA               | NA          | NA                | NA         |
| 1197 | 1.12E-02 | 9.70E-04 | NA       | 9.54E-01 | 8.25E-02 | NA               | NA          | NA                | NA         |
| 1198 | NA       | NA       | NA       | NA       | 5.80E-01 | NA               | NA          | NA                | NA         |
| 1199 | 1.82E-03 | 7.68E-03 | NA       | 8.87E-01 | 3.74E+00 | NA               | NA          | NA                | NA         |
| 1200 | 3.90E-02 | 8.55E-03 | NA       | 1.17E+00 | 2.56E-01 | NA               | NA          | NA                | NA         |
| 1201 | 0.00E+00 | 2.32E-02 | NA       | 7.76E-01 | Inf      | NA               | NA          | NA                | NA         |
| 1202 | 3.39E-02 | 3.85E-03 | NA       | 3.04E+00 | 3.46E-01 | NA               | NA          | NA                | NA         |
| 1203 | NA       | NA       | NA       | 1.64E+00 | NA       | NA               | NA          | NA                | NA         |
| 1204 | 1.02E-02 | 6.23E-03 | Inf      | 6.69E-01 | 4.07E-01 | NA               | NA          | (0.000255,0.0184] | (0.192,21] |
| 1205 | NA       | NA       | NA       | 8.35E-01 | NA       | NA               | NA          | NA                | NA         |
| 1206 | 1.11E-02 | 1.45E-02 | 5.18E-02 | 1.62E+00 | 2.12E+00 | (0.0348,Inf]     | (14.9,Inf]  | (0.0184,Inf]      | (0.192,21] |
| 1207 | 1.38E-02 | 1.32E-02 | NA       | 5.06E-01 | 4.84E-01 | NA               | NA          | NA                | NA         |
| 1208 | 1.35E-02 | 1.42E-02 | NA       | 1.26E+00 | 1.32E+00 | NA               | NA          | NA                | NA         |
| 1209 | 6.13E-02 | 1.10E-02 | NA       | 1.32E+00 | 2.37E-01 | NA               | NA          | NA                | NA         |
| 1210 | NA       | NA       | NA       | 7.85E-01 | NA       | NA               | NA          | NA                | NA         |
| 1211 | NA       | NA       | NA       | 8.38E-01 | NA       | NA               | NA          | NA                | NA         |
| 1212 | 1.90E-03 | 1.36E-03 | NA       | 6.90E-01 | 4.92E-01 | NA               | NA          | NA                | NA         |



|      |          |          |          |          |          |                  |              |    |    |
|------|----------|----------|----------|----------|----------|------------------|--------------|----|----|
| 1213 | 9.11E-03 | 1.72E-02 | 0.00E+00 | 9.81E-01 | 1.85E+00 | (0.0348,Inf]     | (14.9,Inf]   | NA | NA |
| 1214 | 8.48E-04 | 0.00E+00 | NA       | 2.54E-01 | 0.00E+00 | NA               | NA           | NA | NA |
| 1215 | 1.94E-02 | 1.01E-02 | NA       | 4.74E-01 | 2.48E-01 | NA               | NA           | NA | NA |
| 1216 | 9.40E-03 | 0.00E+00 | NA       | 6.42E-01 | 0.00E+00 | NA               | NA           | NA | NA |
| 1217 | NA       | NA       | NA       | 6.66E-01 | NA       | NA               | NA           | NA | NA |
| 1218 | 4.42E-02 | 6.14E-03 | NA       | 1.50E+00 | 2.09E-01 | NA               | NA           | NA | NA |
| 1219 | 2.68E-03 | 3.43E-03 | NA       | 9.47E-01 | 1.21E+00 | NA               | NA           | NA | NA |
| 1220 | 9.29E-03 | 0.00E+00 | NA       | 8.16E-01 | 0.00E+00 | NA               | NA           | NA | NA |
| 1221 | 8.43E-03 | 1.68E-02 | NA       | 3.97E-01 | 7.90E-01 | NA               | NA           | NA | NA |
| 1222 | 4.77E-03 | 3.36E-03 | 0.00E+00 | 1.12E+00 | 7.89E-01 | (0.00294,0.0348] | (1.34,14.9]  | NA | NA |
| 1223 | 7.46E-03 | 3.28E-02 | NA       | 7.19E-01 | 3.16E+00 | NA               | NA           | NA | NA |
| 1224 | 1.70E-02 | 9.67E-03 | NA       | 1.11E+00 | 6.32E-01 | NA               | NA           | NA | NA |
| 1225 | 5.64E-03 | 0.00E+00 | NA       | 9.38E-01 | 0.00E+00 | NA               | NA           | NA | NA |
| 1226 | 8.53E-03 | 0.00E+00 | NA       | 2.28E+00 | 0.00E+00 | NA               | NA           | NA | NA |
| 1227 | NA       | NA       | NA       | NA       | 9.37E-01 | NA               | NA           | NA | NA |
| 1228 | NA       | NA       | NA       | 5.64E-01 | NA       | NA               | NA           | NA | NA |
| 1229 | 2.44E-03 | 0.00E+00 | NA       | 1.05E+00 | 0.00E+00 | NA               | NA           | NA | NA |
| 1230 | 0.00E+00 | 1.42E-03 | NA       | 1.43E+00 | Inf      | NA               | NA           | NA | NA |
| 1231 | 8.42E-03 | 2.18E-03 | NA       | 1.01E+00 | 2.60E-01 | NA               | NA           | NA | NA |
| 1232 | NA       | NA       | NA       | 7.90E-01 | NA       | NA               | NA           | NA | NA |
| 1233 | NA       | NA       | NA       | 8.87E-01 | NA       | NA               | NA           | NA | NA |
| 1234 | NA       | NA       | NA       | 1.25E+00 | NA       | NA               | NA           | NA | NA |
| 1235 | 7.77E-03 | 0.00E+00 | NA       | 8.06E-01 | 0.00E+00 | NA               | NA           | NA | NA |
| 1236 | 0.00E+00 | 2.24E-03 | NA       | 6.33E-01 | Inf      | NA               | NA           | NA | NA |
| 1237 | 1.83E-02 | 0.00E+00 | NA       | 1.24E+00 | 0.00E+00 | NA               | NA           | NA | NA |
| 1238 | 5.92E-03 | 3.45E-03 | NA       | 1.31E+00 | 7.66E-01 | NA               | NA           | NA | NA |
| 1239 | 6.47E-03 | 0.00E+00 | NA       | 7.59E-01 | 0.00E+00 | NA               | NA           | NA | NA |
| 1240 | 2.48E-03 | 2.61E-03 | 0.00E+00 | 5.47E-01 | 5.74E-01 | (0.00294,0.0348] | (1.34,14.9]  | NA | NA |
| 1241 | 1.14E-02 | 1.38E-02 | 0.00E+00 | 9.42E-01 | 1.14E+00 | (0.00294,0.0348] | (0.101,1.34] | NA | NA |
| 1242 | 1.09E-02 | 8.54E-02 | NA       | 9.51E-01 | 7.44E+00 | NA               | NA           | NA | NA |
| 1243 | 8.71E-03 | 5.77E-03 | NA       | 1.09E+00 | 7.21E-01 | NA               | NA           | NA | NA |
| 1244 | 4.50E-03 | 0.00E+00 | NA       | 8.56E-01 | 0.00E+00 | NA               | NA           | NA | NA |
| 1245 | 6.21E-03 | 4.22E-03 | NA       | 6.67E-01 | 4.53E-01 | NA               | NA           | NA | NA |
| 1246 | 4.91E-03 | 4.14E-03 | NA       | 1.20E+00 | 1.01E+00 | NA               | NA           | NA | NA |
| 1247 | 1.41E-03 | 0.00E+00 | NA       | 1.09E+00 | 0.00E+00 | NA               | NA           | NA | NA |
| 1248 | 4.08E-04 | 5.70E-03 | NA       | 2.07E-01 | 2.90E+00 | NA               | NA           | NA | NA |
| 1249 | NA       | NA       | NA       | 6.74E-01 | NA       | NA               | NA           | NA | NA |
| 1250 | NA       | NA       | NA       | 3.27E-01 | NA       | NA               | NA           | NA | NA |

|      |          |          |          |          |          |                    |              |                   |            |
|------|----------|----------|----------|----------|----------|--------------------|--------------|-------------------|------------|
| 1251 | 3.30E-03 | 1.43E-03 | NA       | 6.06E-01 | 2.62E-01 | NA                 | NA           | NA                | NA         |
| 1252 | NA       | NA       | NA       | 8.58E-01 | NA       | NA                 | NA           | NA                | NA         |
| 1253 | 8.31E-03 | 2.68E-03 | 0.00E+00 | 8.93E-01 | 2.88E-01 | (0.00294,0.0348]   | (1.34,14.9]  | NA                | NA         |
| 1254 | 3.41E-03 | 9.25E-04 | 3.46E+01 | 9.70E-01 | 2.63E-01 | (4.25e-05,0.00294] | (0.101,1.34] | (0.0184,Inf]      | (21,Inf]   |
| 1255 | 2.77E-03 | 2.02E-03 | Inf      | 1.30E+00 | 9.49E-01 | NA                 | NA           | (0.000255,0.0184] | (0.192,21] |
| 1256 | 2.95E-03 | 1.48E-02 | Inf      | 5.48E-01 | 2.75E+00 | NA                 | NA           | (0.0184,Inf]      | (0.192,21] |
| 1257 | 5.57E-03 | 1.02E-02 | NA       | 1.21E+00 | 2.21E+00 | NA                 | NA           | NA                | NA         |
| 1258 | NA       | NA       | NA       | 9.29E-01 | NA       | NA                 | NA           | NA                | NA         |
| 1259 | 4.60E-03 | 0.00E+00 | NA       | 1.70E-01 | 0.00E+00 | NA                 | NA           | NA                | NA         |
| 1260 | 4.11E-03 | 3.44E-03 | NA       | 6.77E-01 | 5.67E-01 | NA                 | NA           | NA                | NA         |
| 1261 | 6.48E-03 | 2.95E-02 | 0.00E+00 | 6.02E-01 | 2.74E+00 | (0.0348,Inf]       | (14.9,Inf]   | NA                | NA         |
| 1262 | 1.17E-02 | 1.66E-03 | NA       | 1.46E+00 | 2.08E-01 | NA                 | NA           | NA                | NA         |
| 1263 | 7.01E-03 | 0.00E+00 | NA       | 8.36E-01 | 0.00E+00 | NA                 | NA           | NA                | NA         |
| 1264 | NA       | NA       | NA       | 8.29E-01 | NA       | NA                 | NA           | NA                | NA         |
| 1265 | 2.48E-03 | 7.59E-03 | NA       | 5.18E-01 | 1.59E+00 | NA                 | NA           | NA                | NA         |
| 1266 | 3.62E-03 | 2.48E-03 | NA       | 8.78E-01 | 6.02E-01 | NA                 | NA           | NA                | NA         |
| 1267 | 4.97E-04 | 1.12E-03 | NA       | 4.33E-01 | 9.80E-01 | NA                 | NA           | NA                | NA         |
| 1268 | 6.21E-03 | 8.89E-03 | NA       | 1.12E-01 | 1.60E-01 | NA                 | NA           | NA                | NA         |
| 1269 | 4.33E-03 | 3.02E-03 | NA       | 4.01E-01 | 2.79E-01 | NA                 | NA           | NA                | NA         |
| 1270 | 1.35E-02 | 0.00E+00 | NA       | 1.32E+00 | 0.00E+00 | NA                 | NA           | NA                | NA         |
| 1271 | 3.78E-03 | 4.39E-03 | NA       | 6.01E-01 | 6.97E-01 | NA                 | NA           | NA                | NA         |
| 1272 | 3.16E-02 | 7.99E-03 | NA       | 1.02E+00 | 2.57E-01 | NA                 | NA           | NA                | NA         |
| 1273 | 6.31E-03 | 1.90E-02 | NA       | 4.31E-01 | 1.30E+00 | NA                 | NA           | NA                | NA         |
| 1274 | 6.25E-03 | 1.01E-02 | 7.18E+00 | 4.45E-01 | 7.22E-01 | (0.00294,0.0348]   | (1.34,14.9]  | (0.0184,Inf]      | (21,Inf]   |
| 1275 | NA       | NA       | NA       | 8.39E-01 | NA       | NA                 | NA           | NA                | NA         |
| 1276 | 2.74E-02 | 2.28E-02 | NA       | 8.72E-01 | 7.25E-01 | NA                 | NA           | NA                | NA         |
| 1277 | 1.89E-02 | 0.00E+00 | NA       | 5.59E-01 | 0.00E+00 | NA                 | NA           | NA                | NA         |
| 1278 | NA       | NA       | 0.00E+00 | 2.83E+00 | NA       | (0.0348,Inf]       | NA           | NA                | NA         |
| 1279 | 4.16E-03 | 4.91E-03 | NA       | 3.84E-01 | 4.54E-01 | NA                 | NA           | NA                | NA         |
| 1280 | 9.20E-04 | 1.16E-02 | NA       | 1.24E+00 | 1.56E+01 | NA                 | NA           | NA                | NA         |
| 1281 | 6.57E-03 | 0.00E+00 | NA       | 8.64E-01 | 0.00E+00 | NA                 | NA           | NA                | NA         |
| 1282 | 0.00E+00 | 6.55E-04 | NA       | 9.46E-01 | Inf      | NA                 | NA           | NA                | NA         |
| 1283 | 9.85E-03 | 7.39E-04 | NA       | 1.37E+00 | 1.03E-01 | NA                 | NA           | NA                | NA         |
| 1284 | NA       | NA       | NA       | 1.42E+00 | NA       | NA                 | NA           | NA                | NA         |
| 1285 | 8.36E-03 | 0.00E+00 | NA       | 1.12E+00 | 0.00E+00 | NA                 | NA           | NA                | NA         |
| 1286 | 0.00E+00 | 1.97E-03 | NA       | 1.38E+00 | Inf      | NA                 | NA           | NA                | NA         |
| 1287 | 9.50E-03 | 6.67E-03 | NA       | 9.00E-01 | 6.32E-01 | NA                 | NA           | NA                | NA         |
| 1288 | 4.87E-03 | 6.69E-04 | NA       | 6.82E-01 | 9.36E-02 | NA                 | NA           | NA                | NA         |

|      |          |          |          |          |          |                  |              |              |            |
|------|----------|----------|----------|----------|----------|------------------|--------------|--------------|------------|
| 1289 | 6.81E-03 | 1.31E-02 | NA       | 6.24E-01 | 1.20E+00 | NA               | NA           | NA           | NA         |
| 1290 | 2.07E-02 | 3.25E-03 | NA       | 8.32E-01 | 1.30E-01 | NA               | NA           | NA           | NA         |
| 1291 | 5.61E-03 | 0.00E+00 | 1.44E+00 | 4.34E-01 | 0.00E+00 | (0.0348,Inf]     | (14.9,Inf]   | (0.0184,Inf] | (21,Inf]   |
| 1292 | 1.85E-03 | 1.56E-02 | NA       | 7.89E-01 | 6.64E+00 | NA               | NA           | NA           | NA         |
| 1293 | 7.95E-03 | 0.00E+00 | NA       | 6.56E-01 | 0.00E+00 | NA               | NA           | NA           | NA         |
| 1294 | 1.63E-02 | 2.00E-03 | NA       | 1.61E+00 | 1.96E-01 | NA               | NA           | NA           | NA         |
| 1295 | 1.22E-02 | 2.94E-03 | NA       | 9.53E-01 | 2.29E-01 | NA               | NA           | NA           | NA         |
| 1296 | NA       | NA       | NA       | 6.45E-01 | NA       | NA               | NA           | NA           | NA         |
| 1297 | 0.00E+00 | 1.74E-03 | NA       | 9.51E-01 | Inf      | NA               | NA           | NA           | NA         |
| 1298 | 8.89E-03 | 0.00E+00 | NA       | 1.33E+00 | 0.00E+00 | NA               | NA           | NA           | NA         |
| 1299 | 8.59E-03 | 7.47E-03 | NA       | 5.31E-01 | 4.62E-01 | NA               | NA           | NA           | NA         |
| 1300 | 1.80E-02 | 0.00E+00 | NA       | 6.23E-01 | 0.00E+00 | NA               | NA           | NA           | NA         |
| 1301 | NA       | NA       | NA       | 8.33E-01 | NA       | NA               | NA           | NA           | NA         |
| 1302 | 8.32E-03 | 5.47E-03 | NA       | 7.56E-01 | 4.97E-01 | NA               | NA           | NA           | NA         |
| 1303 | 3.94E-02 | 3.46E-02 | 2.49E+00 | 1.64E+00 | 1.44E+00 | (0.00294,0.0348] | (0.101,1.34] | (0.0184,Inf] | (0.192,21] |
| 1304 | 0.00E+00 | 0.00E+00 | NA       | 6.21E-01 | NA       | NA               | NA           | NA           | NA         |
| 1305 | 0.00E+00 | 1.51E-03 | NA       | 4.70E-01 | Inf      | NA               | NA           | NA           | NA         |
| 1306 | 1.01E-03 | 0.00E+00 | NA       | 9.37E-01 | 0.00E+00 | NA               | NA           | NA           | NA         |
| 1307 | NA       | NA       | NA       | 1.11E+00 | NA       | NA               | NA           | NA           | NA         |
| 1308 | 8.56E-03 | 6.04E-03 | 0.00E+00 | 1.68E+00 | 1.18E+00 | (0.00294,0.0348] | (0.101,1.34] | NA           | NA         |
| 1309 | NA       | NA       | NA       | 7.28E-01 | NA       | NA               | NA           | NA           | NA         |
| 1310 | 8.61E-03 | 4.56E-03 | NA       | 2.37E+00 | 1.26E+00 | NA               | NA           | NA           | NA         |
| 1311 | 1.29E-02 | 3.00E-02 | NA       | 8.40E-01 | 1.95E+00 | NA               | NA           | NA           | NA         |
| 1312 | 1.24E-02 | 1.92E-02 | 0.00E+00 | 8.50E-01 | 1.32E+00 | (0.0348,Inf]     | (1.34,14.9]  | NA           | NA         |
| 1313 | 9.97E-03 | 7.53E-03 | NA       | 8.18E-01 | 6.18E-01 | NA               | NA           | NA           | NA         |
| 1314 | 4.21E-03 | 3.60E-03 | NA       | 1.53E+00 | 1.31E+00 | NA               | NA           | NA           | NA         |
| 1315 | 0.00E+00 | 0.00E+00 | NA       | 1.18E+00 | NA       | NA               | NA           | NA           | NA         |
| 1316 | 1.46E-02 | 1.64E-02 | NA       | 5.11E-01 | 5.75E-01 | NA               | NA           | NA           | NA         |
| 1317 | 7.97E-03 | 1.43E-03 | NA       | 8.46E-01 | 1.51E-01 | NA               | NA           | NA           | NA         |
| 1318 | NA       | NA       | NA       | 6.99E-01 | NA       | NA               | NA           | NA           | NA         |
| 1319 | 6.35E-03 | 0.00E+00 | NA       | 6.14E-01 | 0.00E+00 | NA               | NA           | NA           | NA         |
| 1320 | NA       | NA       | NA       | 9.66E-01 | NA       | NA               | NA           | NA           | NA         |
| 1321 | 0.00E+00 | 0.00E+00 | NA       | 5.46E-01 | NA       | NA               | NA           | NA           | NA         |
| 1322 | NA       | NA       | NA       | 6.23E-01 | NA       | NA               | NA           | NA           | NA         |
| 1323 | NA       | NA       | NA       | 7.27E-01 | NA       | NA               | NA           | NA           | NA         |
| 1324 | NA       | NA       | NA       | 1.02E+00 | NA       | NA               | NA           | NA           | NA         |
| 1325 | 1.46E-02 | 0.00E+00 | NA       | 1.52E+00 | 0.00E+00 | NA               | NA           | NA           | NA         |
| 1326 | 0.00E+00 | 1.74E-03 | NA       | 7.23E-01 | Inf      | NA               | NA           | NA           | NA         |

|      |          |          |          |          |          |                  |            |                   |          |
|------|----------|----------|----------|----------|----------|------------------|------------|-------------------|----------|
| 1327 | 1.12E-02 | 0.00E+00 | NA       | 1.33E+00 | 0.00E+00 | NA               | NA         | NA                | NA       |
| 1328 | 5.15E-03 | 0.00E+00 | NA       | 8.74E-01 | 0.00E+00 | NA               | NA         | NA                | NA       |
| 1329 | NA       | NA       | 9.76E-01 | 1.25E+00 | NA       | (0.0348,Inf]     | NA         | (0.0184,Inf]      | NA       |
| 1330 | NA       | NA       | Inf      | NA       | NA       | NA               | NA         | NA                | (21,Inf] |
| 1331 | NA       | NA       | NA       | 7.75E-01 | NA       | NA               | NA         | NA                | NA       |
| 1332 | NA       | NA       | NA       | 7.61E-01 | NA       | NA               | NA         | NA                | NA       |
| 1333 | 7.25E-03 | 1.53E-02 | NA       | 5.60E-01 | 1.18E+00 | NA               | NA         | NA                | NA       |
| 1334 | NA       | NA       | NA       | 4.82E-01 | NA       | NA               | NA         | NA                | NA       |
| 1335 | 0.00E+00 | 9.11E-03 | NA       | 1.19E+00 | Inf      | NA               | NA         | NA                | NA       |
| 1336 | 1.29E-02 | 1.38E-02 | NA       | 6.70E-01 | 7.20E-01 | NA               | NA         | NA                | NA       |
| 1337 | 1.06E-02 | 0.00E+00 | NA       | 8.51E-01 | 0.00E+00 | NA               | NA         | NA                | NA       |
| 1338 | 1.93E-02 | 1.37E-02 | NA       | 1.76E+00 | 1.25E+00 | NA               | NA         | NA                | NA       |
| 1339 | 8.55E-04 | 1.16E-03 | NA       | 6.76E-01 | 9.19E-01 | NA               | NA         | NA                | NA       |
| 1340 | 3.73E-03 | 1.11E-02 | 6.95E+00 | 5.54E-01 | 1.64E+00 | (0.0348,Inf]     | (14.9,Inf] | (0.0184,Inf]      | (21,Inf] |
| 1341 | NA       | NA       | NA       | 1.51E+00 | NA       | NA               | NA         | NA                | NA       |
| 1342 | 3.51E-03 | 0.00E+00 | NA       | 1.35E+00 | 0.00E+00 | NA               | NA         | NA                | NA       |
| 1343 | NA       | NA       | NA       | 8.30E-01 | NA       | NA               | NA         | NA                | NA       |
| 1344 | 6.95E-03 | 0.00E+00 | NA       | 6.18E-01 | 0.00E+00 | NA               | NA         | NA                | NA       |
| 1345 | 1.68E-03 | 1.60E-03 | 0.00E+00 | 8.00E-01 | 7.65E-01 | (0.00294,0.0348] | (14.9,Inf] | NA                | NA       |
| 1346 | NA       | NA       | NA       | 5.60E-01 | NA       | NA               | NA         | NA                | NA       |
| 1347 | 0.00E+00 | 0.00E+00 | NA       | 2.14E+01 | NA       | NA               | NA         | NA                | NA       |
| 1348 | 1.20E-03 | 1.12E-02 | NA       | 6.68E-01 | 6.22E+00 | NA               | NA         | NA                | NA       |
| 1349 | 2.95E-02 | 2.38E-02 | 0.00E+00 | 1.46E+00 | 1.18E+00 | (0.0348,Inf]     | (14.9,Inf] | NA                | NA       |
| 1350 | 0.00E+00 | 1.09E-02 | NA       | 1.79E+00 | Inf      | NA               | NA         | NA                | NA       |
| 1351 | 8.44E-03 | 3.57E-03 | Inf      | 5.17E-01 | 2.19E-01 | NA               | NA         | (0.0184,Inf]      | (21,Inf] |
| 1352 | 1.59E-02 | 8.99E-03 | NA       | 1.66E+00 | 9.38E-01 | NA               | NA         | NA                | NA       |
| 1353 | 4.50E-03 | 6.27E-03 | NA       | 4.90E-01 | 6.83E-01 | NA               | NA         | NA                | NA       |
| 1354 | 1.34E-02 | 1.11E-02 | NA       | 1.03E+00 | 8.57E-01 | NA               | NA         | NA                | NA       |
| 1355 | NA       | NA       | 7.49E-01 | 9.78E-01 | NA       | (0.00294,0.0348] | NA         | (0.000255,0.0184] | NA       |
| 1356 | 1.49E-02 | 0.00E+00 | NA       | 1.40E+00 | 0.00E+00 | NA               | NA         | NA                | NA       |
| 1357 | 1.03E-02 | 2.29E-03 | NA       | 9.31E-01 | 2.08E-01 | NA               | NA         | NA                | NA       |
| 1358 | 0.00E+00 | 0.00E+00 | NA       | 7.23E-01 | NA       | NA               | NA         | NA                | NA       |
| 1359 | 7.72E-03 | 0.00E+00 | NA       | 1.47E+00 | 0.00E+00 | NA               | NA         | NA                | NA       |
| 1360 | 5.06E-03 | 1.22E-03 | NA       | 8.91E-01 | 2.15E-01 | NA               | NA         | NA                | NA       |
| 1361 | 3.29E-03 | 0.00E+00 | NA       | 1.18E+00 | 0.00E+00 | NA               | NA         | NA                | NA       |
| 1362 | 7.48E-02 | 2.52E-03 | Inf      | 7.96E-01 | 2.68E-02 | NA               | NA         | (0.0184,Inf]      | (21,Inf] |
| 1363 | 7.13E-03 | 3.89E-03 | NA       | 9.82E-01 | 5.36E-01 | NA               | NA         | NA                | NA       |
| 1364 | 1.04E-02 | 3.53E-03 | NA       | 8.38E-01 | 2.84E-01 | NA               | NA         | NA                | NA       |

|      |          |          |          |          |          |                  |             |                   |            |
|------|----------|----------|----------|----------|----------|------------------|-------------|-------------------|------------|
| 1365 | NA       | NA       | NA       | 5.26E-01 | NA       | NA               | NA          | NA                | NA         |
| 1366 | NA       | NA       | NA       | 5.66E-01 | NA       | NA               | NA          | NA                | NA         |
| 1367 | 1.38E-02 | 4.47E-03 | NA       | 1.17E+00 | 3.80E-01 | NA               | NA          | NA                | NA         |
| 1368 | 1.09E-02 | 1.28E-02 | NA       | 9.96E-01 | 1.17E+00 | NA               | NA          | NA                | NA         |
| 1369 | 1.62E-02 | 1.40E-02 | 0.00E+00 | 2.23E+00 | 1.92E+00 | (0.0348,Inf]     | (14.9,Inf]  | NA                | NA         |
| 1370 | 1.12E-02 | 2.87E-03 | NA       | 1.16E+00 | 2.98E-01 | NA               | NA          | NA                | NA         |
| 1371 | 1.61E-02 | 9.64E-03 | 0.00E+00 | 4.77E-01 | 2.86E-01 | (0.0348,Inf]     | (1.34,14.9] | NA                | NA         |
| 1372 | 2.66E-02 | 2.42E-02 | NA       | 6.64E-01 | 6.03E-01 | NA               | NA          | NA                | NA         |
| 1373 | 0.00E+00 | 0.00E+00 | NA       | 9.18E-01 | NA       | NA               | NA          | NA                | NA         |
| 1374 | 0.00E+00 | 0.00E+00 | NA       | 1.77E+00 | NA       | NA               | NA          | NA                | NA         |
| 1375 | 9.21E-03 | 0.00E+00 | NA       | 5.05E-01 | 0.00E+00 | NA               | NA          | NA                | NA         |
| 1376 | 8.52E-03 | 7.79E-03 | 9.48E-02 | 1.20E+00 | 1.10E+00 | (0.0348,Inf]     | (1.34,14.9] | (0.000255,0.0184] | (0.192,21] |
| 1377 | 0.00E+00 | 0.00E+00 | NA       | 1.36E-01 | NA       | NA               | NA          | NA                | NA         |
| 1378 | NA       | NA       | NA       | 4.98E-01 | NA       | NA               | NA          | NA                | NA         |
| 1379 | 2.72E-02 | 0.00E+00 | Inf      | 4.91E-01 | 0.00E+00 | NA               | NA          | (0.000255,0.0184] | (21,Inf]   |
| 1380 | 4.82E-03 | 1.74E-03 | 5.56E+01 | 3.87E-01 | 1.40E-01 | (0.0348,Inf]     | (1.34,14.9] | (0.0184,Inf]      | (21,Inf]   |
| 1381 | 4.87E-03 | 0.00E+00 | 0.00E+00 | 2.06E+00 | 0.00E+00 | (0.00294,0.0348] | (1.34,14.9] | NA                | NA         |
| 1382 | 4.47E-03 | 1.87E-02 | 0.00E+00 | 1.00E+00 | 4.19E+00 | (0.0348,Inf]     | (14.9,Inf]  | NA                | NA         |
| 1383 | 0.00E+00 | 0.00E+00 | Inf      | 4.66E-01 | NA       | NA               | NA          | (0.0184,Inf]      | (21,Inf]   |
| 1384 | 5.23E-03 | 0.00E+00 | Inf      | 6.14E-01 | 0.00E+00 | NA               | NA          | (0.000255,0.0184] | (21,Inf]   |
| 1385 | 7.38E-03 | 1.01E-03 | NA       | 1.01E+00 | 1.38E-01 | NA               | NA          | NA                | NA         |
| 1386 | 1.01E-02 | 0.00E+00 | NA       | 6.36E-01 | 0.00E+00 | NA               | NA          | NA                | NA         |
| 1387 | 1.28E-02 | 3.20E-03 | NA       | 8.29E-01 | 2.07E-01 | NA               | NA          | NA                | NA         |
| 1388 | 0.00E+00 | 6.50E-03 | NA       | 3.98E-01 | Inf      | NA               | NA          | NA                | NA         |
| 1389 | NA       | NA       | NA       | 8.95E-01 | NA       | NA               | NA          | NA                | NA         |
| 1390 | 8.56E-03 | 3.76E-03 | NA       | 1.01E+00 | 4.46E-01 | NA               | NA          | NA                | NA         |
| 1391 | 2.94E-03 | 4.96E-03 | NA       | 6.08E-01 | 1.03E+00 | NA               | NA          | NA                | NA         |
| 1392 | 1.35E-02 | 0.00E+00 | Inf      | 1.31E+00 | 0.00E+00 | NA               | NA          | (0.0184,Inf]      | (21,Inf]   |
| 1393 | 6.50E-03 | 8.60E-03 | NA       | 1.15E+00 | 1.53E+00 | NA               | NA          | NA                | NA         |
| 1394 | 5.32E-03 | 7.53E-03 | Inf      | 6.52E-01 | 9.24E-01 | NA               | NA          | (0.000255,0.0184] | (0.192,21] |
| 1395 | 1.71E-03 | 0.00E+00 | 2.04E+00 | 1.03E+00 | 0.00E+00 | (0.0348,Inf]     | (14.9,Inf]  | (0.0184,Inf]      | (21,Inf]   |
| 1396 | 1.22E-02 | 2.83E-03 | 0.00E+00 | 1.54E+00 | 3.56E-01 | (0.0348,Inf]     | (14.9,Inf]  | NA                | NA         |
| 1397 | 1.04E-02 | 1.23E-02 | 0.00E+00 | 5.36E-01 | 6.31E-01 | (0.00294,0.0348] | (1.34,14.9] | NA                | NA         |
| 1398 | NA       | NA       | NA       | 7.14E-01 | NA       | NA               | NA          | NA                | NA         |
| 1399 | 6.59E-03 | 5.59E-03 | NA       | 9.67E-01 | 8.20E-01 | NA               | NA          | NA                | NA         |
| 1400 | 5.00E-02 | 2.00E-02 | Inf      | 6.50E-01 | 2.60E-01 | NA               | NA          | (0.0184,Inf]      | (0.192,21] |
| 1401 | 3.51E-04 | 2.53E-03 | Inf      | 7.08E-01 | 5.10E+00 | NA               | NA          | (0.0184,Inf]      | (0.192,21] |
| 1402 | 0.00E+00 | 8.71E-03 | NA       | 9.26E-01 | Inf      | NA               | NA          | NA                | NA         |

|      |          |          |          |          |          |              |             |                   |            |
|------|----------|----------|----------|----------|----------|--------------|-------------|-------------------|------------|
| 1403 | 8.27E-03 | 7.06E-03 | NA       | 7.16E-01 | 6.11E-01 | NA           | NA          | NA                | NA         |
| 1404 | 1.18E-02 | 6.65E-03 | NA       | 9.52E-01 | 5.37E-01 | NA           | NA          | NA                | NA         |
| 1405 | 7.92E-03 | 3.82E-03 | NA       | 8.33E-01 | 4.02E-01 | NA           | NA          | NA                | NA         |
| 1406 | 3.62E-03 | 3.56E-03 | NA       | 8.89E-01 | 8.73E-01 | NA           | NA          | NA                | NA         |
| 1407 | 1.35E-02 | 1.44E-03 | 0.00E+00 | 1.38E+00 | 1.48E-01 | (0.0348,Inf] | (1.34,14.9] | NA                | NA         |
| 1408 | 3.19E-02 | 0.00E+00 | NA       | 1.49E+00 | 0.00E+00 | NA           | NA          | NA                | NA         |
| 1409 | 2.85E-03 | 2.10E-02 | NA       | 3.18E-01 | 2.34E+00 | NA           | NA          | NA                | NA         |
| 1410 | 5.66E-03 | 1.30E-02 | NA       | 6.52E-01 | 1.49E+00 | NA           | NA          | NA                | NA         |
| 1411 | NA       | NA       | NA       | 3.78E-01 | NA       | NA           | NA          | NA                | NA         |
| 1412 | NA       | NA       | NA       | 8.04E-01 | NA       | NA           | NA          | NA                | NA         |
| 1413 | 2.20E-02 | 6.32E-03 | 3.06E-01 | 2.59E+00 | 7.44E-01 | (0.0348,Inf] | (1.34,14.9] | (0.000255,0.0184] | (0.192,21] |
| 1414 | NA       | NA       | NA       | 6.01E-01 | NA       | NA           | NA          | NA                | NA         |
| 1415 | 2.83E-02 | 1.04E-02 | NA       | 1.39E+00 | 5.14E-01 | NA           | NA          | NA                | NA         |
| 1416 | 1.34E-02 | 0.00E+00 | NA       | 1.63E+00 | 0.00E+00 | NA           | NA          | NA                | NA         |
| 1417 | 2.42E-02 | 7.83E-03 | 0.00E+00 | 1.25E+00 | 4.06E-01 | (0.0348,Inf] | (1.34,14.9] | NA                | NA         |
| 1418 | 8.90E-03 | 2.92E-03 | NA       | 6.60E-01 | 2.17E-01 | NA           | NA          | NA                | NA         |
| 1419 | NA       | NA       | NA       | 6.45E-01 | NA       | NA           | NA          | NA                | NA         |
| 1420 | 3.01E-03 | 1.39E-02 | NA       | 8.97E-01 | 4.14E+00 | NA           | NA          | NA                | NA         |
| 1421 | 1.40E-02 | 0.00E+00 | NA       | 1.50E+00 | 0.00E+00 | NA           | NA          | NA                | NA         |
| 1422 | 0.00E+00 | 8.39E-04 | NA       | 1.05E+00 | Inf      | NA           | NA          | NA                | NA         |
| 1423 | 9.10E-03 | 0.00E+00 | NA       | 1.07E+00 | 0.00E+00 | NA           | NA          | NA                | NA         |
| 1424 | NA       | NA       | 0.00E+00 | NA       | 3.34E-01 | NA           | (1.34,14.9] | NA                | NA         |
| 1425 | 2.12E-03 | 1.27E-03 | NA       | 1.11E+00 | 6.64E-01 | NA           | NA          | NA                | NA         |
| 1426 | 0.00E+00 | 0.00E+00 | NA       | 8.12E-01 | NA       | NA           | NA          | NA                | NA         |
| 1427 | NA       | NA       | NA       | 7.08E-01 | NA       | NA           | NA          | NA                | NA         |
| 1428 | NA       | NA       | Inf      | 1.03E+00 | NA       | NA           | NA          | (0.0184,Inf]      | NA         |
| 1429 | NA       | NA       | NA       | 1.38E+00 | NA       | NA           | NA          | NA                | NA         |
| 1430 | 0.00E+00 | 0.00E+00 | NA       | 8.35E-01 | NA       | NA           | NA          | NA                | NA         |
| 1431 | 1.07E-02 | 0.00E+00 | NA       | 1.03E+00 | 0.00E+00 | NA           | NA          | NA                | NA         |
| 1432 | 9.50E-03 | 0.00E+00 | NA       | 7.31E-01 | 0.00E+00 | NA           | NA          | NA                | NA         |
| 1433 | NA       | NA       | NA       | 1.77E+00 | NA       | NA           | NA          | NA                | NA         |
| 1434 | 0.00E+00 | 1.29E-03 | NA       | 1.30E+00 | Inf      | NA           | NA          | NA                | NA         |
| 1435 | NA       | NA       | NA       | 1.80E-01 | NA       | NA           | NA          | NA                | NA         |
| 1436 | 4.51E-03 | 4.10E-03 | NA       | 6.10E-01 | 5.56E-01 | NA           | NA          | NA                | NA         |
| 1437 | 1.02E-03 | 6.09E-03 | NA       | 5.33E-01 | 3.17E+00 | NA           | NA          | NA                | NA         |
| 1438 | 3.55E-03 | 2.15E-02 | NA       | 3.06E-01 | 1.85E+00 | NA           | NA          | NA                | NA         |
| 1439 | 0.00E+00 | 0.00E+00 | NA       | 4.90E-01 | NA       | NA           | NA          | NA                | NA         |
| 1440 | 0.00E+00 | 1.03E-02 | NA       | 8.35E-01 | Inf      | NA           | NA          | NA                | NA         |

|      |          |          |          |          |          |                  |              |                   |            |
|------|----------|----------|----------|----------|----------|------------------|--------------|-------------------|------------|
| 1441 | 1.88E-02 | 0.00E+00 | NA       | 9.11E-01 | 0.00E+00 | NA               | NA           | NA                | NA         |
| 1442 | 3.15E-02 | 3.70E-03 | NA       | 1.32E+00 | 1.55E-01 | NA               | NA           | NA                | NA         |
| 1443 | 0.00E+00 | 5.37E-03 | NA       | 5.09E-01 | Inf      | NA               | NA           | NA                | NA         |
| 1444 | 1.62E-02 | 1.34E-03 | NA       | 7.67E-01 | 6.34E-02 | NA               | NA           | NA                | NA         |
| 1445 | 0.00E+00 | 0.00E+00 | NA       | 6.36E-01 | NA       | NA               | NA           | NA                | NA         |
| 1446 | 6.68E-03 | 0.00E+00 | NA       | 4.66E-01 | 0.00E+00 | NA               | NA           | NA                | NA         |
| 1447 | 1.75E-02 | 0.00E+00 | Inf      | 6.97E-01 | 0.00E+00 | NA               | NA           | (0.0184,Inf]      | (21,Inf]   |
| 1448 | 2.16E-02 | 1.01E-02 | 1.85E-01 | 8.46E-01 | 3.95E-01 | (0.0348,Inf]     | (1.34,14.9]  | (0.0184,Inf]      | (0.192,21] |
| 1449 | 2.74E-03 | 0.00E+00 | NA       | 8.97E-01 | 0.00E+00 | NA               | NA           | NA                | NA         |
| 1450 | NA       | NA       | NA       | 9.11E-01 | NA       | NA               | NA           | NA                | NA         |
| 1451 | 0.00E+00 | 0.00E+00 | NA       | 8.80E-01 | NA       | NA               | NA           | NA                | NA         |
| 1452 | 6.86E-03 | 5.60E-04 | NA       | 1.08E+00 | 8.81E-02 | NA               | NA           | NA                | NA         |
| 1453 | 1.14E-02 | 0.00E+00 | NA       | 4.30E-01 | 0.00E+00 | NA               | NA           | NA                | NA         |
| 1454 | 5.23E-02 | 5.85E-03 | NA       | 1.07E+00 | 1.19E-01 | NA               | NA           | NA                | NA         |
| 1455 | 0.00E+00 | 5.98E-03 | NA       | 9.37E-01 | Inf      | NA               | NA           | NA                | NA         |
| 1456 | 0.00E+00 | 4.76E-03 | NA       | 4.68E-01 | Inf      | NA               | NA           | NA                | NA         |
| 1457 | NA       | NA       | NA       | 3.25E-01 | NA       | NA               | NA           | NA                | NA         |
| 1458 | NA       | NA       | NA       | 1.32E+00 | NA       | NA               | NA           | NA                | NA         |
| 1459 | 8.63E-03 | 1.06E-03 | NA       | 1.54E+00 | 1.90E-01 | NA               | NA           | NA                | NA         |
| 1460 | 3.29E-02 | 3.36E-02 | NA       | 7.49E-01 | 7.65E-01 | NA               | NA           | NA                | NA         |
| 1461 | 3.22E-02 | 1.05E-02 | NA       | 5.84E-01 | 1.91E-01 | NA               | NA           | NA                | NA         |
| 1462 | NA       | NA       | NA       | 6.89E-01 | NA       | NA               | NA           | NA                | NA         |
| 1463 | 2.76E-02 | 6.56E-03 | NA       | 1.25E+00 | 2.98E-01 | NA               | NA           | NA                | NA         |
| 1464 | 2.04E-02 | 1.76E-02 | NA       | 8.85E-01 | 7.63E-01 | NA               | NA           | NA                | NA         |
| 1465 | 3.85E-02 | 0.00E+00 | NA       | 2.66E+00 | 0.00E+00 | NA               | NA           | NA                | NA         |
| 1466 | 3.06E-03 | 2.13E-02 | NA       | 2.29E-01 | 1.59E+00 | NA               | NA           | NA                | NA         |
| 1467 | 1.78E-02 | 6.60E-03 | 0.00E+00 | 9.38E-01 | 3.48E-01 | (0.0348,Inf]     | (1.34,14.9]  | NA                | NA         |
| 1468 | NA       | NA       | NA       | 7.57E-01 | NA       | NA               | NA           | NA                | NA         |
| 1469 | 3.36E-02 | 1.92E-02 | 9.24E-01 | 1.84E+00 | 1.05E+00 | (0.00294,0.0348] | (0.101,1.34] | (0.000255,0.0184] | (0.192,21] |
| 1470 | 8.50E-03 | 3.94E-03 | NA       | 8.61E-01 | 4.00E-01 | NA               | NA           | NA                | NA         |
| 1471 | 8.26E-03 | 2.39E-02 | 0.00E+00 | 5.31E-01 | 1.54E+00 | (0.00294,0.0348] | (0.101,1.34] | NA                | NA         |
| 1472 | NA       | NA       | NA       | 1.24E+00 | NA       | NA               | NA           | NA                | NA         |
| 1473 | NA       | NA       | Inf      | NA       | NA       | NA               | NA           | NA                | (21,Inf]   |
| 1474 | NA       | NA       | NA       | 7.42E-01 | NA       | NA               | NA           | NA                | NA         |
| 1475 | 5.19E-04 | 7.34E-03 | NA       | 4.48E-01 | 6.34E+00 | NA               | NA           | NA                | NA         |
| 1476 | 0.00E+00 | 3.00E-03 | NA       | 1.03E+00 | Inf      | NA               | NA           | NA                | NA         |
| 1477 | NA       | NA       | NA       | 6.63E-01 | NA       | NA               | NA           | NA                | NA         |
| 1478 | 1.56E-02 | 0.00E+00 | NA       | 1.34E+00 | 0.00E+00 | NA               | NA           | NA                | NA         |

|      |          |          |          |          |          |                  |              |                   |            |
|------|----------|----------|----------|----------|----------|------------------|--------------|-------------------|------------|
| 1479 | 8.05E-03 | 3.27E-02 | NA       | 5.84E-01 | 2.37E+00 | NA               | NA           | NA                | NA         |
| 1480 | 2.06E-02 | 1.21E-02 | NA       | 8.96E-01 | 5.28E-01 | NA               | NA           | NA                | NA         |
| 1481 | 1.14E-02 | 3.74E-02 | NA       | 5.17E-01 | 1.69E+00 | NA               | NA           | NA                | NA         |
| 1482 | NA       | NA       | NA       | 9.94E-01 | NA       | NA               | NA           | NA                | NA         |
| 1483 | 0.00E+00 | 3.85E-03 | NA       | 7.19E-01 | Inf      | NA               | NA           | NA                | NA         |
| 1484 | 6.51E-03 | 8.85E-03 | NA       | 1.12E+00 | 1.52E+00 | NA               | NA           | NA                | NA         |
| 1485 | 1.64E-02 | 0.00E+00 | NA       | 1.06E+00 | 0.00E+00 | NA               | NA           | NA                | NA         |
| 1486 | 1.96E-02 | 2.12E-02 | NA       | 1.48E+00 | 1.60E+00 | NA               | NA           | NA                | NA         |
| 1487 | NA       | NA       | NA       | 9.12E-01 | NA       | NA               | NA           | NA                | NA         |
| 1488 | 9.96E-03 | 1.11E-02 | NA       | 1.02E+00 | 1.14E+00 | NA               | NA           | NA                | NA         |
| 1489 | 2.25E-02 | 1.28E-02 | NA       | 1.81E+00 | 1.03E+00 | NA               | NA           | NA                | NA         |
| 1490 | 3.42E-01 | 7.14E-01 | 3.12E-01 | 6.36E-01 | 1.33E+00 | (0.0348,Inf]     | (0.101,1.34] | (0.0184,Inf]      | (0,0.192]  |
| 1491 | 2.68E-02 | 1.43E-02 | 0.00E+00 | 2.35E+00 | 1.26E+00 | (0.0348,Inf]     | (1.34,14.9]  | NA                | NA         |
| 1492 | 0.00E+00 | 3.18E-03 | NA       | 1.96E+00 | Inf      | NA               | NA           | NA                | NA         |
| 1493 | 3.65E-03 | 5.66E-03 | NA       | 1.06E+00 | 1.65E+00 | NA               | NA           | NA                | NA         |
| 1494 | NA       | NA       | NA       | 1.43E+00 | NA       | NA               | NA           | NA                | NA         |
| 1495 | 1.42E-03 | 5.56E-03 | NA       | 1.59E+00 | 6.22E+00 | NA               | NA           | NA                | NA         |
| 1496 | 3.64E-03 | 7.54E-03 | 0.00E+00 | 8.34E-01 | 1.73E+00 | (0.0348,Inf]     | (1.34,14.9]  | NA                | NA         |
| 1497 | 0.00E+00 | 1.51E-02 | NA       | 3.54E-01 | Inf      | NA               | NA           | NA                | NA         |
| 1498 | 1.25E-02 | 3.95E-03 | 0.00E+00 | 1.23E+00 | 3.92E-01 | (0.0348,Inf]     | (14.9,Inf]   | NA                | NA         |
| 1499 | 4.39E-02 | 9.91E-03 | 0.00E+00 | 1.84E+00 | 4.14E-01 | (0.00294,0.0348] | (0.101,1.34] | NA                | NA         |
| 1500 | 2.58E-02 | 9.95E-03 | NA       | 6.42E-01 | 2.48E-01 | NA               | NA           | NA                | NA         |
| 1501 | 1.23E-02 | 8.09E-02 | 1.09E+00 | 4.37E-01 | 2.86E+00 | (0.0348,Inf]     | (1.34,14.9]  | (0.0184,Inf]      | (0.192,21] |
| 1502 | 1.20E-02 | 2.13E-03 | NA       | 1.37E+00 | 2.43E-01 | NA               | NA           | NA                | NA         |
| 1503 | 5.23E-02 | 1.44E-02 | Inf      | 1.99E+00 | 5.47E-01 | NA               | NA           | (0.000255,0.0184] | (0.192,21] |
| 1504 | 7.22E-03 | 2.27E-03 | NA       | 1.09E+00 | 3.42E-01 | NA               | NA           | NA                | NA         |
| 1505 | 9.60E-03 | 0.00E+00 | NA       | 1.10E+00 | 0.00E+00 | NA               | NA           | NA                | NA         |
| 1506 | NA       | NA       | NA       | 1.15E+00 | NA       | NA               | NA           | NA                | NA         |
| 1507 | 2.12E-02 | 2.67E-03 | NA       | 1.70E+00 | 2.14E-01 | NA               | NA           | NA                | NA         |
| 1508 | 4.21E-03 | 1.52E-02 | NA       | 8.47E-01 | 3.05E+00 | NA               | NA           | NA                | NA         |
| 1509 | NA       | NA       | NA       | 6.85E-01 | NA       | NA               | NA           | NA                | NA         |
| 1510 | 2.76E-03 | 1.26E-03 | NA       | 3.14E+00 | 1.43E+00 | NA               | NA           | NA                | NA         |
| 1511 | 1.01E-02 | 0.00E+00 | NA       | 9.62E-01 | 0.00E+00 | NA               | NA           | NA                | NA         |
| 1512 | 1.50E-02 | 1.56E-02 | NA       | 1.45E+00 | 1.50E+00 | NA               | NA           | NA                | NA         |
| 1513 | 3.44E-03 | 3.62E-03 | NA       | 1.21E+00 | 1.27E+00 | NA               | NA           | NA                | NA         |
| 1514 | 0.00E+00 | 5.82E-03 | NA       | 7.44E-01 | Inf      | NA               | NA           | NA                | NA         |
| 1515 | NA       | NA       | NA       | 9.28E-01 | NA       | NA               | NA           | NA                | NA         |
| 1516 | 1.78E-02 | 9.02E-04 | NA       | 2.28E+00 | 1.15E-01 | NA               | NA           | NA                | NA         |



|      |          |          |          |          |          |              |            |                   |            |
|------|----------|----------|----------|----------|----------|--------------|------------|-------------------|------------|
| 1517 | 8.47E-03 | 1.53E-02 | NA       | 4.08E-01 | 7.37E-01 | NA           | NA         | NA                | NA         |
| 1518 | 0.00E+00 | 7.83E-03 | NA       | 6.43E-01 | Inf      | NA           | NA         | NA                | NA         |
| 1519 | NA       | NA       | NA       | 9.13E-01 | NA       | NA           | NA         | NA                | NA         |
| 1520 | 5.97E-03 | 0.00E+00 | NA       | 1.14E+00 | 0.00E+00 | NA           | NA         | NA                | NA         |
| 1521 | 2.70E-03 | 4.82E-03 | Inf      | 7.34E-01 | 1.31E+00 | NA           | NA         | (0.0184,Inf]      | (0.192,21] |
| 1522 | 9.16E-03 | 0.00E+00 | NA       | 5.45E-01 | 0.00E+00 | NA           | NA         | NA                | NA         |
| 1523 | 1.03E-02 | 0.00E+00 | NA       | 1.18E+00 | 0.00E+00 | NA           | NA         | NA                | NA         |
| 1524 | NA       | NA       | NA       | 1.00E+00 | NA       | NA           | NA         | NA                | NA         |
| 1525 | 0.00E+00 | 1.05E-02 | NA       | 1.27E+00 | Inf      | NA           | NA         | NA                | NA         |
| 1526 | 9.59E-02 | 5.01E-03 | NA       | 1.21E+00 | 6.33E-02 | NA           | NA         | NA                | NA         |
| 1527 | NA       | NA       | NA       | 7.86E-01 | NA       | NA           | NA         | NA                | NA         |
| 1528 | 1.91E-02 | 1.31E-02 | NA       | 9.98E-01 | 6.85E-01 | NA           | NA         | NA                | NA         |
| 1529 | 2.70E-02 | 5.95E-03 | NA       | 7.20E-01 | 1.59E-01 | NA           | NA         | NA                | NA         |
| 1530 | NA       | NA       | NA       | 0.00E+00 | NA       | NA           | NA         | NA                | NA         |
| 1531 | NA       | NA       | NA       | 7.80E-01 | NA       | NA           | NA         | NA                | NA         |
| 1532 | NA       | NA       | NA       | 7.89E-01 | NA       | NA           | NA         | NA                | NA         |
| 1533 | NA       | NA       | NA       | 6.90E-01 | NA       | NA           | NA         | NA                | NA         |
| 1534 | 5.53E-03 | 5.52E-03 | NA       | 4.99E-01 | 4.97E-01 | NA           | NA         | NA                | NA         |
| 1535 | NA       | NA       | NA       | 1.00E+00 | NA       | NA           | NA         | NA                | NA         |
| 1536 | 2.21E-01 | 5.03E-01 | NA       | 4.90E-01 | 1.11E+00 | NA           | NA         | NA                | NA         |
| 1537 | 1.79E-02 | 1.02E-02 | NA       | 1.09E+00 | 6.24E-01 | NA           | NA         | NA                | NA         |
| 1538 | 0.00E+00 | 0.00E+00 | NA       | 2.04E+00 | NA       | NA           | NA         | NA                | NA         |
| 1539 | NA       | NA       | NA       | 1.51E+00 | NA       | NA           | NA         | NA                | NA         |
| 1540 | 2.42E-03 | 1.66E-02 | NA       | 9.29E-01 | 6.38E+00 | NA           | NA         | NA                | NA         |
| 1541 | 0.00E+00 | 5.79E-03 | NA       | 5.48E-01 | Inf      | NA           | NA         | NA                | NA         |
| 1542 | NA       | NA       | NA       | 4.29E-01 | NA       | NA           | NA         | NA                | NA         |
| 1543 | 1.16E-02 | 0.00E+00 | NA       | 8.39E-01 | 0.00E+00 | NA           | NA         | NA                | NA         |
| 1544 | 1.89E-02 | 1.15E-02 | NA       | 7.51E-01 | 4.55E-01 | NA           | NA         | NA                | NA         |
| 1545 | 3.53E-03 | 1.71E-02 | NA       | 6.26E-01 | 3.04E+00 | NA           | NA         | NA                | NA         |
| 1546 | NA       | NA       | Inf      | 6.31E-01 | NA       | NA           | NA         | (0.000255,0.0184] | NA         |
| 1547 | 7.66E-03 | 2.51E-02 | 7.17E-01 | 7.27E-01 | 2.38E+00 | (0.0348,Inf] | (14.9,Inf] | (0.0184,Inf]      | (0.192,21] |
| 1548 | 8.16E-03 | 4.49E-03 | NA       | 6.97E-01 | 3.84E-01 | NA           | NA         | NA                | NA         |
| 1549 | 0.00E+00 | 1.96E-02 | NA       | 1.79E+00 | Inf      | NA           | NA         | NA                | NA         |
| 1550 | NA       | NA       | NA       | 9.34E-01 | NA       | NA           | NA         | NA                | NA         |
| 1551 | NA       | NA       | NA       | 3.06E+00 | NA       | NA           | NA         | NA                | NA         |
| 1552 | 1.21E-02 | 1.32E-02 | NA       | 1.75E+00 | 1.90E+00 | NA           | NA         | NA                | NA         |
| 1553 | NA       | NA       | NA       | 7.87E-01 | NA       | NA           | NA         | NA                | NA         |
| 1554 | 1.47E-02 | 2.77E-02 | NA       | 1.70E-01 | 3.19E-01 | NA           | NA         | NA                | NA         |

|      |          |          |          |          |          |    |             |                   |            |
|------|----------|----------|----------|----------|----------|----|-------------|-------------------|------------|
| 1555 | 2.25E-03 | 0.00E+00 | NA       | 4.98E-01 | 0.00E+00 | NA | NA          | NA                | NA         |
| 1556 | 1.30E-02 | 1.07E-02 | NA       | 6.35E-01 | 5.20E-01 | NA | NA          | NA                | NA         |
| 1557 | NA       | NA       | NA       | NA       | 2.19E+00 | NA | NA          | NA                | NA         |
| 1558 | 5.81E-03 | 1.48E-02 | NA       | 3.16E-01 | 8.07E-01 | NA | NA          | NA                | NA         |
| 1559 | NA       | NA       | NA       | 1.50E+00 | NA       | NA | NA          | NA                | NA         |
| 1560 | NA       | NA       | NA       | 8.06E-01 | NA       | NA | NA          | NA                | NA         |
| 1561 | NA       | NA       | NA       | 8.58E-01 | NA       | NA | NA          | NA                | NA         |
| 1562 | NA       | NA       | NA       | 5.41E-01 | NA       | NA | NA          | NA                | NA         |
| 1563 | 0.00E+00 | 0.00E+00 | NA       | 9.67E-01 | NA       | NA | NA          | NA                | NA         |
| 1564 | NA       | NA       | NA       | 2.57E-01 | NA       | NA | NA          | NA                | NA         |
| 1565 | 0.00E+00 | 0.00E+00 | NA       | 8.13E-01 | NA       | NA | NA          | NA                | NA         |
| 1566 | NA       | NA       | 1.25E+00 | NA       | 7.03E-01 | NA | (1.34,14.9] | NA                | (0.192,21] |
| 1567 | 1.67E-03 | 0.00E+00 | NA       | 7.05E-01 | 0.00E+00 | NA | NA          | NA                | NA         |
| 1568 | 0.00E+00 | 1.19E-02 | NA       | 6.32E-01 | Inf      | NA | NA          | NA                | NA         |
| 1569 | 2.84E-02 | 1.90E-02 | NA       | 8.44E-01 | 5.67E-01 | NA | NA          | NA                | NA         |
| 1570 | NA       | NA       | NA       | 7.17E-01 | NA       | NA | NA          | NA                | NA         |
| 1571 | NA       | NA       | NA       | 9.30E-01 | NA       | NA | NA          | NA                | NA         |
| 1572 | 1.07E-03 | 0.00E+00 | NA       | 6.47E-01 | 0.00E+00 | NA | NA          | NA                | NA         |
| 1573 | NA       | NA       | NA       | 4.73E-01 | NA       | NA | NA          | NA                | NA         |
| 1574 | NA       | NA       | NA       | 6.82E-01 | NA       | NA | NA          | NA                | NA         |
| 1575 | NA       | NA       | NA       | 9.78E-01 | NA       | NA | NA          | NA                | NA         |
| 1576 | NA       | NA       | NA       | 2.54E+00 | NA       | NA | NA          | NA                | NA         |
| 1577 | 1.00E-02 | 0.00E+00 | NA       | 7.45E-01 | 0.00E+00 | NA | NA          | NA                | NA         |
| 1578 | 0.00E+00 | 0.00E+00 | Inf      | 5.06E+00 | NA       | NA | NA          | (0.000255,0.0184] | (21,Inf]   |
| 1579 | 3.45E-02 | 2.03E-03 | Inf      | 9.99E-01 | 5.89E-02 | NA | NA          | (0.0184,Inf]      | (21,Inf]   |
| 1580 | 0.00E+00 | 0.00E+00 | NA       | 4.82E-01 | NA       | NA | NA          | NA                | NA         |
| 1581 | NA       | NA       | NA       | 3.63E-01 | NA       | NA | NA          | NA                | NA         |
| 1582 | 1.54E-02 | 1.57E-02 | Inf      | 5.00E-01 | 5.11E-01 | NA | NA          | (0.0184,Inf]      | (0.192,21] |
| 1583 | 9.63E-03 | 6.76E-03 | NA       | 9.44E-01 | 6.63E-01 | NA | NA          | NA                | NA         |
| 1584 | 1.38E-02 | 5.64E-03 | NA       | 6.06E-01 | 2.47E-01 | NA | NA          | NA                | NA         |
| 1585 | 2.05E-03 | 4.53E-03 | NA       | 7.28E-01 | 1.61E+00 | NA | NA          | NA                | NA         |
| 1586 | 2.74E-03 | 1.50E-02 | NA       | 9.84E-01 | 5.38E+00 | NA | NA          | NA                | NA         |
| 1587 | 0.00E+00 | 0.00E+00 | NA       | 2.73E-01 | NA       | NA | NA          | NA                | NA         |
| 1588 | NA       | NA       | NA       | 6.64E-01 | NA       | NA | NA          | NA                | NA         |
| 1589 | 9.24E-03 | 0.00E+00 | NA       | 1.19E+00 | 0.00E+00 | NA | NA          | NA                | NA         |
| 1590 | NA       | NA       | NA       | 7.71E-01 | NA       | NA | NA          | NA                | NA         |
| 1591 | 0.00E+00 | 0.00E+00 | NA       | 9.02E-01 | NA       | NA | NA          | NA                | NA         |
| 1592 | 0.00E+00 | 1.66E-03 | NA       | 1.33E+00 | Inf      | NA | NA          | NA                | NA         |

|      |          |          |          |          |          |                  |              |              |            |
|------|----------|----------|----------|----------|----------|------------------|--------------|--------------|------------|
| 1593 | NA       | NA       | NA       | 1.56E+00 | NA       | NA               | NA           | NA           | NA         |
| 1594 | 1.63E-02 | 0.00E+00 | Inf      | 9.25E-01 | 0.00E+00 | NA               | NA           | (0.0184,Inf] | (21,Inf]   |
| 1595 | 1.22E-02 | 2.85E-02 | NA       | 7.24E-01 | 1.70E+00 | NA               | NA           | NA           | NA         |
| 1596 | 0.00E+00 | 2.30E-03 | NA       | 1.33E+00 | Inf      | NA               | NA           | NA           | NA         |
| 1597 | 1.13E-02 | 2.89E-02 | 0.00E+00 | 3.08E-01 | 7.87E-01 | (0.0348,Inf]     | (1.34,14.9]  | NA           | NA         |
| 1598 | 9.47E-03 | 2.80E-02 | NA       | 5.03E-01 | 1.49E+00 | NA               | NA           | NA           | NA         |
| 1599 | 3.13E-02 | 3.50E-02 | 0.00E+00 | 1.60E+00 | 1.79E+00 | (0.0348,Inf]     | (1.34,14.9]  | NA           | NA         |
| 1600 | NA       | NA       | NA       | 5.92E-02 | NA       | NA               | NA           | NA           | NA         |
| 1601 | NA       | NA       | NA       | 5.07E-01 | NA       | NA               | NA           | NA           | NA         |
| 1602 | 2.79E-02 | 1.35E-02 | 2.45E+00 | 1.06E+00 | 5.15E-01 | (0.0348,Inf]     | (1.34,14.9]  | (0.0184,Inf] | (21,Inf]   |
| 1603 | 1.23E-02 | 0.00E+00 | NA       | 6.02E-01 | 0.00E+00 | NA               | NA           | NA           | NA         |
| 1604 | 0.00E+00 | 2.54E-03 | NA       | 1.56E+00 | Inf      | NA               | NA           | NA           | NA         |
| 1605 | 5.73E-03 | 0.00E+00 | NA       | 2.88E+00 | 0.00E+00 | NA               | NA           | NA           | NA         |
| 1606 | NA       | NA       | NA       | 7.30E-01 | NA       | NA               | NA           | NA           | NA         |
| 1607 | 0.00E+00 | 3.35E-03 | NA       | 2.78E-01 | Inf      | NA               | NA           | NA           | NA         |
| 1608 | NA       | NA       | NA       | 1.19E-01 | NA       | NA               | NA           | NA           | NA         |
| 1609 | NA       | NA       | NA       | 1.54E+00 | NA       | NA               | NA           | NA           | NA         |
| 1610 | 1.74E-01 | 5.05E-01 | NA       | 5.65E-01 | 1.64E+00 | NA               | NA           | NA           | NA         |
| 1611 | 0.00E+00 | 0.00E+00 | NA       | 1.07E+00 | NA       | NA               | NA           | NA           | NA         |
| 1612 | 6.34E-03 | 7.26E-02 | NA       | 2.50E-01 | 2.87E+00 | NA               | NA           | NA           | NA         |
| 1613 | 0.00E+00 | 2.12E-02 | NA       | 1.69E-01 | Inf      | NA               | NA           | NA           | NA         |
| 1614 | NA       | NA       | NA       | 4.69E-01 | NA       | NA               | NA           | NA           | NA         |
| 1615 | 1.45E-02 | 0.00E+00 | NA       | 6.39E-01 | 0.00E+00 | NA               | NA           | NA           | NA         |
| 1616 | 0.00E+00 | 7.76E-03 | NA       | 7.67E-01 | Inf      | NA               | NA           | NA           | NA         |
| 1617 | 4.18E-01 | 5.52E-01 | NA       | 7.15E-01 | 9.44E-01 | NA               | NA           | NA           | NA         |
| 1618 | 5.30E-03 | 1.78E-03 | NA       | 1.47E+00 | 4.94E-01 | NA               | NA           | NA           | NA         |
| 1619 | 0.00E+00 | 0.00E+00 | NA       | 1.09E+00 | NA       | NA               | NA           | NA           | NA         |
| 1620 | 4.27E-03 | 1.40E-02 | NA       | 1.21E+00 | 3.96E+00 | NA               | NA           | NA           | NA         |
| 1621 | 1.62E-02 | 2.84E-03 | NA       | 3.23E+00 | 5.68E-01 | NA               | NA           | NA           | NA         |
| 1622 | 1.78E-02 | 4.83E-02 | 9.19E-01 | 2.86E-01 | 7.76E-01 | (0.0348,Inf]     | (1.34,14.9]  | (0.0184,Inf] | (0.192,21] |
| 1623 | 0.00E+00 | 2.91E-02 | NA       | 9.70E-01 | Inf      | NA               | NA           | NA           | NA         |
| 1624 | NA       | NA       | Inf      | 1.29E+00 | NA       | NA               | NA           | (0.0184,Inf] | NA         |
| 1625 | NA       | NA       | NA       | 1.12E+00 | NA       | NA               | NA           | NA           | NA         |
| 1626 | NA       | NA       | NA       | 1.17E+00 | NA       | NA               | NA           | NA           | NA         |
| 1627 | NA       | NA       | NA       | 3.76E-01 | NA       | NA               | NA           | NA           | NA         |
| 1628 | NA       | NA       | NA       | 1.05E+00 | NA       | NA               | NA           | NA           | NA         |
| 1629 | 3.63E-02 | 4.54E-02 | 0.00E+00 | 6.97E-01 | 8.73E-01 | (0.00294,0.0348] | (0.101,1.34] | NA           | NA         |
| 1630 | NA       | NA       | NA       | 1.03E+00 | NA       | NA               | NA           | NA           | NA         |

|      |          |          |          |          |          |              |              |              |            |
|------|----------|----------|----------|----------|----------|--------------|--------------|--------------|------------|
| 1631 | 1.39E-02 | 2.06E-02 | NA       | 4.54E-01 | 6.69E-01 | NA           | NA           | NA           | NA         |
| 1632 | 1.29E-02 | 0.00E+00 | NA       | 3.45E-01 | 0.00E+00 | NA           | NA           | NA           | NA         |
| 1633 | 1.22E-02 | 0.00E+00 | NA       | 6.92E-01 | 0.00E+00 | NA           | NA           | NA           | NA         |
| 1634 | NA       | NA       | NA       | 5.33E-01 | NA       | NA           | NA           | NA           | NA         |
| 1635 | 1.23E-02 | 0.00E+00 | Inf      | 1.51E+00 | 0.00E+00 | NA           | NA           | (0.0184,Inf] | (21,Inf]   |
| 1636 | 0.00E+00 | 0.00E+00 | NA       | 1.49E+00 | NA       | NA           | NA           | NA           | NA         |
| 1637 | 0.00E+00 | 6.32E-02 | NA       | 2.04E-01 | Inf      | NA           | NA           | NA           | NA         |
| 1638 | NA       | NA       | NA       | 1.85E+00 | NA       | NA           | NA           | NA           | NA         |
| 1639 | 2.59E-03 | 1.40E-01 | NA       | 8.46E-01 | 4.57E+01 | NA           | NA           | NA           | NA         |
| 1640 | NA       | NA       | NA       | 1.68E+00 | NA       | NA           | NA           | NA           | NA         |
| 1641 | 5.88E-03 | 8.31E-03 | NA       | 3.17E-01 | 4.47E-01 | NA           | NA           | NA           | NA         |
| 1642 | 0.00E+00 | 1.43E-02 | NA       | 5.65E-01 | Inf      | NA           | NA           | NA           | NA         |
| 1643 | 1.10E-02 | 0.00E+00 | NA       | 6.65E-01 | 0.00E+00 | NA           | NA           | NA           | NA         |
| 1644 | 4.45E-02 | 0.00E+00 | 2.22E+01 | 2.93E+00 | 0.00E+00 | (0.0348,Inf] | (1.34,14.9]  | (0.0184,Inf] | (21,Inf]   |
| 1645 | 1.57E-02 | 2.06E-03 | 0.00E+00 | 5.43E-01 | 7.13E-02 | (0.0348,Inf] | (1.34,14.9]  | NA           | NA         |
| 1646 | Inf      | 3.08E+00 | 2.32E+01 | Inf      | 1.59E+02 | (0.0348,Inf] | (0.101,1.34] | (0.0184,Inf] | (0,0.192]  |
| 1647 | 0.00E+00 | 0.00E+00 | NA       | 3.09E-01 | NA       | NA           | NA           | NA           | NA         |
| 1648 | NA       | NA       | NA       | 1.27E-01 | NA       | NA           | NA           | NA           | NA         |
| 1649 | 5.03E-02 | 1.32E-02 | NA       | 1.48E+00 | 3.88E-01 | NA           | NA           | NA           | NA         |
| 1650 | NA       | NA       | NA       | 8.13E-01 | NA       | NA           | NA           | NA           | NA         |
| 1651 | 4.60E-03 | 6.52E-03 | NA       | 5.27E-01 | 7.46E-01 | NA           | NA           | NA           | NA         |
| 1652 | 1.81E-02 | 2.70E-02 | NA       | 4.77E-01 | 7.12E-01 | NA           | NA           | NA           | NA         |
| 1653 | NA       | NA       | 0.00E+00 | 8.78E-01 | NA       | (0.0348,Inf] | NA           | NA           | NA         |
| 1654 | 6.34E-03 | 0.00E+00 | NA       | 1.03E+00 | 0.00E+00 | NA           | NA           | NA           | NA         |
| 1655 | NA       | NA       | NA       | 1.32E+00 | NA       | NA           | NA           | NA           | NA         |
| 1656 | 4.66E-02 | 4.44E-02 | 0.00E+00 | 1.69E+00 | 1.61E+00 | (0.0348,Inf] | (14.9,Inf]   | NA           | NA         |
| 1657 | NA       | NA       | NA       | 4.23E-01 | NA       | NA           | NA           | NA           | NA         |
| 1658 | 7.19E-03 | 0.00E+00 | NA       | 4.39E+00 | 0.00E+00 | NA           | NA           | NA           | NA         |
| 1659 | 2.02E-02 | 1.86E-02 | NA       | 8.05E-01 | 7.42E-01 | NA           | NA           | NA           | NA         |
| 1660 | 1.54E-02 | 4.91E-03 | Inf      | 9.48E-01 | 3.02E-01 | NA           | NA           | (0.0184,Inf] | (0.192,21] |
| 1661 | 0.00E+00 | 7.35E-03 | NA       | 1.74E+00 | Inf      | NA           | NA           | NA           | NA         |
| 1662 | 1.86E-02 | 0.00E+00 | NA       | 4.56E-01 | 0.00E+00 | NA           | NA           | NA           | NA         |
| 1663 | 0.00E+00 | 1.32E-03 | NA       | 8.46E-01 | Inf      | NA           | NA           | NA           | NA         |
| 1664 | 1.67E-02 | 4.68E-02 | 0.00E+00 | 4.41E-01 | 1.24E+00 | (0.0348,Inf] | (1.34,14.9]  | NA           | NA         |
| 1665 | 2.00E-02 | 0.00E+00 | NA       | 1.89E+00 | 0.00E+00 | NA           | NA           | NA           | NA         |
| 1666 | NA       | NA       | NA       | 9.50E-02 | NA       | NA           | NA           | NA           | NA         |
| 1667 | 6.19E-03 | 3.26E-02 | 0.00E+00 | 1.90E+00 | 1.00E+01 | (0.0348,Inf] | (14.9,Inf]   | NA           | NA         |
| 1668 | 2.35E-03 | 1.06E-02 | NA       | 1.11E+00 | 4.99E+00 | NA           | NA           | NA           | NA         |

|      |          |          |          |          |          |                  |              |              |            |
|------|----------|----------|----------|----------|----------|------------------|--------------|--------------|------------|
| 1669 | NA       | NA       | NA       | 1.96E+00 | NA       | NA               | NA           | NA           | NA         |
| 1670 | NA       | NA       | NA       | 1.76E-01 | NA       | NA               | NA           | NA           | NA         |
| 1671 | 6.50E-03 | 0.00E+00 | 0.00E+00 | 2.72E-01 | 0.00E+00 | (0.0348,Inf]     | (1.34,14.9]  | NA           | NA         |
| 1672 | 2.58E-02 | 6.74E-03 | NA       | 8.10E-01 | 2.12E-01 | NA               | NA           | NA           | NA         |
| 1673 | 1.63E-02 | 2.26E-02 | 0.00E+00 | 1.12E+00 | 1.55E+00 | (0.0348,Inf]     | (1.34,14.9]  | NA           | NA         |
| 1674 | NA       | NA       | NA       | 3.69E-01 | NA       | NA               | NA           | NA           | NA         |
| 1675 | 0.00E+00 | 8.00E-03 | NA       | 7.37E-01 | Inf      | NA               | NA           | NA           | NA         |
| 1676 | 0.00E+00 | 0.00E+00 | NA       | 1.55E+00 | NA       | NA               | NA           | NA           | NA         |
| 1677 | 8.15E-03 | 6.51E-03 | NA       | 9.42E-01 | 7.53E-01 | NA               | NA           | NA           | NA         |
| 1678 | NA       | NA       | NA       | 3.55E-01 | NA       | NA               | NA           | NA           | NA         |
| 1679 | 3.57E-02 | 0.00E+00 | NA       | 8.95E-01 | 0.00E+00 | NA               | NA           | NA           | NA         |
| 1680 | NA       | NA       | NA       | 4.54E-01 | NA       | NA               | NA           | NA           | NA         |
| 1681 | 0.00E+00 | 0.00E+00 | NA       | 1.75E-01 | NA       | NA               | NA           | NA           | NA         |
| 1682 | 0.00E+00 | 2.15E-03 | NA       | 1.53E+00 | Inf      | NA               | NA           | NA           | NA         |
| 1683 | 1.59E-02 | 0.00E+00 | NA       | 1.01E+00 | 0.00E+00 | NA               | NA           | NA           | NA         |
| 1684 | 1.40E-03 | 2.09E-02 | NA       | 8.61E-01 | 1.28E+01 | NA               | NA           | NA           | NA         |
| 1685 | 1.09E-02 | 1.46E-02 | NA       | 4.77E-01 | 6.37E-01 | NA               | NA           | NA           | NA         |
| 1686 | 0.00E+00 | 9.91E-03 | NA       | 6.47E-01 | Inf      | NA               | NA           | NA           | NA         |
| 1687 | 0.00E+00 | 0.00E+00 | NA       | 4.22E-01 | NA       | NA               | NA           | NA           | NA         |
| 1688 | 0.00E+00 | 0.00E+00 | Inf      | 4.79E-01 | NA       | NA               | NA           | (0.0184,Inf] | (21,Inf]   |
| 1689 | NA       | NA       | 0.00E+00 | 2.01E-01 | NA       | (0.0348,Inf]     | NA           | NA           | NA         |
| 1690 | 1.99E-02 | 0.00E+00 | NA       | 1.27E+00 | 0.00E+00 | NA               | NA           | NA           | NA         |
| 1691 | 1.54E-02 | 3.92E-02 | 0.00E+00 | 4.04E-01 | 1.03E+00 | (0.00294,0.0348] | (0.101,1.34] | NA           | NA         |
| 1692 | 8.14E-03 | 4.21E-03 | NA       | 6.00E-01 | 3.11E-01 | NA               | NA           | NA           | NA         |
| 1693 | 0.00E+00 | 1.03E-02 | NA       | 7.51E-01 | Inf      | NA               | NA           | NA           | NA         |
| 1694 | 1.04E-02 | 5.42E-02 | 6.49E-01 | 3.73E-01 | 1.95E+00 | (0.0348,Inf]     | (14.9,Inf]   | (0.0184,Inf] | (0.192,21] |
| 1695 | 4.36E-02 | 3.15E-02 | 1.52E+01 | 3.86E+00 | 2.79E+00 | (0.0348,Inf]     | (14.9,Inf]   | (0.0184,Inf] | (21,Inf]   |
| 1696 | 0.00E+00 | 5.80E-03 | Inf      | 8.48E-01 | Inf      | NA               | NA           | (0.0184,Inf] | (0.192,21] |
| 1697 | 0.00E+00 | 0.00E+00 | NA       | 1.16E+00 | NA       | NA               | NA           | NA           | NA         |
| 1698 | 0.00E+00 | 3.91E-02 | NA       | 5.10E-01 | Inf      | NA               | NA           | NA           | NA         |
| 1699 | 3.85E-02 | 1.80E-01 | NA       | 1.16E-01 | 5.44E-01 | NA               | NA           | NA           | NA         |
| 1700 | 2.45E-03 | 4.40E-03 | NA       | 1.35E+00 | 2.42E+00 | NA               | NA           | NA           | NA         |
| 1701 | 1.02E-02 | 0.00E+00 | NA       | 5.77E-01 | 0.00E+00 | NA               | NA           | NA           | NA         |
| 1702 | NA       | NA       | NA       | 2.40E-01 | NA       | NA               | NA           | NA           | NA         |
| 1703 | NA       | NA       | NA       | 7.53E-01 | NA       | NA               | NA           | NA           | NA         |
| 1704 | 6.45E-03 | 7.90E-02 | NA       | 2.58E-01 | 3.16E+00 | NA               | NA           | NA           | NA         |
| 1705 | 4.01E-02 | 1.03E-02 | 0.00E+00 | 1.23E+00 | 3.19E-01 | (0.0348,Inf]     | (1.34,14.9]  | NA           | NA         |
| 1706 | 0.00E+00 | 2.80E-03 | NA       | 1.78E+00 | Inf      | NA               | NA           | NA           | NA         |

|      |          |          |          |          |          |                  |              |                   |            |
|------|----------|----------|----------|----------|----------|------------------|--------------|-------------------|------------|
| 1707 | 2.19E-02 | 4.98E-03 | NA       | 1.95E+00 | 4.43E-01 | NA               | NA           | NA                | NA         |
| 1708 | Inf      | 2.94E-03 | NA       | Inf      | 1.75E-01 | NA               | NA           | NA                | NA         |
| 1709 | 4.17E-03 | 0.00E+00 | NA       | 5.22E-01 | 0.00E+00 | NA               | NA           | NA                | NA         |
| 1710 | 1.20E-01 | 1.61E-02 | 1.24E+00 | 2.53E+00 | 3.41E-01 | (0.0348,Inf]     | (1.34,14.9]  | (0.0184,Inf]      | (21,Inf]   |
| 1711 | 0.00E+00 | 0.00E+00 | 1.31E+01 | 1.98E-01 | NA       | (0.00294,0.0348] | (14.9,Inf]   | (0.0184,Inf]      | (21,Inf]   |
| 1712 | 3.22E-02 | 5.24E-02 | NA       | 3.61E-01 | 5.87E-01 | NA               | NA           | NA                | NA         |
| 1713 | 3.04E-02 | 1.36E-02 | 0.00E+00 | 2.62E+00 | 1.17E+00 | (0.0348,Inf]     | (14.9,Inf]   | NA                | NA         |
| 1714 | NA       | NA       | NA       | 1.03E+00 | NA       | NA               | NA           | NA                | NA         |
| 1715 | 0.00E+00 | 0.00E+00 | 0.00E+00 | 1.73E+00 | NA       | (0.0348,Inf]     | (14.9,Inf]   | NA                | NA         |
| 1716 | 2.61E-02 | 0.00E+00 | NA       | 3.83E-01 | 0.00E+00 | NA               | NA           | NA                | NA         |
| 1717 | 0.00E+00 | 4.18E-02 | NA       | 4.06E-01 | Inf      | NA               | NA           | NA                | NA         |
| 1718 | 1.84E-02 | 0.00E+00 | NA       | 2.28E+00 | 0.00E+00 | NA               | NA           | NA                | NA         |
| 1719 | NA       | NA       | NA       | 2.24E-01 | NA       | NA               | NA           | NA                | NA         |
| 1720 | NA       | NA       | NA       | 1.23E+00 | NA       | NA               | NA           | NA                | NA         |
| 1721 | NA       | NA       | 3.75E-01 | NA       | 1.64E+00 | NA               | (0,0.101]    | NA                | (0,0.192]  |
| 1722 | 3.11E-02 | 2.16E-02 | NA       | 6.24E-01 | 4.33E-01 | NA               | NA           | NA                | NA         |
| 1723 | 7.90E-02 | 3.39E-02 | NA       | 1.51E+00 | 6.45E-01 | NA               | NA           | NA                | NA         |
| 1724 | 7.53E-03 | 0.00E+00 | NA       | 2.10E-01 | 0.00E+00 | NA               | NA           | NA                | NA         |
| 1725 | 5.07E-02 | 1.67E-03 | NA       | 1.94E+00 | 6.37E-02 | NA               | NA           | NA                | NA         |
| 1726 | NA       | NA       | 0.00E+00 | 2.62E+00 | NA       | (0.0348,Inf]     | NA           | NA                | NA         |
| 1727 | 3.24E-03 | 1.61E-02 | Inf      | 9.69E-01 | 4.82E+00 | NA               | NA           | (0.000255,0.0184] | (0.192,21] |
| 1728 | NA       | NA       | 0.00E+00 | NA       | 5.40E-01 | NA               | (0.101,1.34] | NA                | NA         |
| 1729 | NA       | NA       | NA       | 3.30E-01 | NA       | NA               | NA           | NA                | NA         |
| 1730 | 7.69E-03 | 0.00E+00 | NA       | 3.70E-01 | 0.00E+00 | NA               | NA           | NA                | NA         |
| 1731 | NA       | NA       | Inf      | NA       | NA       | NA               | NA           | NA                | (21,Inf]   |
| 1732 | NA       | NA       | Inf      | NA       | NA       | NA               | NA           | NA                | (21,Inf]   |
| 1733 | NA       | NA       | NA       | 1.49E+00 | NA       | NA               | NA           | NA                | NA         |
| 1734 | 8.61E-03 | 4.97E-03 | 0.00E+00 | 7.75E-01 | 4.48E-01 | (0.0348,Inf]     | (1.34,14.9]  | NA                | NA         |
| 1735 | 1.00E-02 | 1.20E-02 | 0.00E+00 | 8.17E-01 | 9.79E-01 | (0.0348,Inf]     | (1.34,14.9]  | NA                | NA         |
| 1736 | 0.00E+00 | 0.00E+00 | Inf      | 1.57E+00 | NA       | NA               | NA           | (0.0184,Inf]      | (21,Inf]   |
| 1737 | NA       | NA       | NA       | 1.04E+00 | NA       | NA               | NA           | NA                | NA         |
| 1738 | 9.83E-02 | 1.97E-02 | NA       | 2.75E+00 | 5.51E-01 | NA               | NA           | NA                | NA         |
| 1739 | 3.16E+00 | 0.00E+00 | NA       | 4.00E-01 | 0.00E+00 | NA               | NA           | NA                | NA         |
| 1740 | 3.12E-01 | 7.61E-02 | 0.00E+00 | 3.08E+00 | 7.52E-01 | (0.0348,Inf]     | (1.34,14.9]  | NA                | NA         |
| 1741 | 4.00E-02 | 0.00E+00 | NA       | 3.40E+00 | 0.00E+00 | NA               | NA           | NA                | NA         |
| 1742 | 1.41E-01 | 4.75E-02 | 0.00E+00 | 5.01E-01 | 1.68E-01 | (0.0348,Inf]     | (1.34,14.9]  | NA                | NA         |
| 1743 | NA       | NA       | 0.00E+00 | 1.41E-01 | NA       | (0.0348,Inf]     | NA           | NA                | NA         |
| 1744 | 5.87E-02 | 0.00E+00 | NA       | 1.70E+00 | 0.00E+00 | NA               | NA           | NA                | NA         |

|      |          |          |          |          |          |              |             |                   |            |
|------|----------|----------|----------|----------|----------|--------------|-------------|-------------------|------------|
| 1745 | NA       | NA       | NA       | 2.23E-01 | NA       | NA           | NA          | NA                | NA         |
| 1746 | NA       | NA       | NA       | 7.35E-01 | NA       | NA           | NA          | NA                | NA         |
| 1747 | NA       | NA       | NA       | 6.32E-01 | NA       | NA           | NA          | NA                | NA         |
| 1748 | 0.00E+00 | 0.00E+00 | NA       | 4.37E-01 | NA       | NA           | NA          | NA                | NA         |
| 1749 | Inf      | 2.01E-03 | NA       | Inf      | 4.06E-01 | NA           | NA          | NA                | NA         |
| 1750 | 1.22E+00 | 0.00E+00 | NA       | 8.83E+00 | 0.00E+00 | NA           | NA          | NA                | NA         |
| 1751 | 0.00E+00 | 1.58E-02 | NA       | 9.32E-01 | Inf      | NA           | NA          | NA                | NA         |
| 1752 | 0.00E+00 | 2.24E-02 | NA       | 6.71E-01 | Inf      | NA           | NA          | NA                | NA         |
| 1753 | 0.00E+00 | 1.96E-02 | NA       | 1.59E-01 | Inf      | NA           | NA          | NA                | NA         |
| 1754 | 1.09E-01 | 0.00E+00 | NA       | 4.31E+00 | 0.00E+00 | NA           | NA          | NA                | NA         |
| 1755 | NA       | NA       | NA       | 3.89E-01 | NA       | NA           | NA          | NA                | NA         |
| 1756 | 3.79E-02 | 2.13E-03 | NA       | 1.33E+00 | 7.47E-02 | NA           | NA          | NA                | NA         |
| 1757 | NA       | NA       | NA       | 9.50E-01 | NA       | NA           | NA          | NA                | NA         |
| 1758 | NA       | NA       | NA       | 2.94E-01 | NA       | NA           | NA          | NA                | NA         |
| 1759 | 0.00E+00 | 0.00E+00 | NA       | 5.25E-01 | NA       | NA           | NA          | NA                | NA         |
| 1760 | 3.04E-03 | 5.88E-02 | 4.50E-01 | 8.02E-01 | 1.55E+01 | (0.0348,Inf] | (14.9,Inf]  | (0.0184,Inf]      | (0.192,21] |
| 1761 | 0.00E+00 | 0.00E+00 | NA       | 4.09E-01 | NA       | NA           | NA          | NA                | NA         |
| 1762 | NA       | NA       | NA       | 1.07E+00 | NA       | NA           | NA          | NA                | NA         |
| 1763 | 1.43E-02 | 0.00E+00 | NA       | 5.00E-01 | 0.00E+00 | NA           | NA          | NA                | NA         |
| 1764 | NA       | NA       | NA       | 1.08E+00 | NA       | NA           | NA          | NA                | NA         |
| 1765 | 1.28E-02 | 0.00E+00 | 7.92E-01 | 2.59E-01 | 0.00E+00 | (0.0348,Inf] | (14.9,Inf]  | (0.0184,Inf]      | (21,Inf]   |
| 1766 | 1.76E-02 | 2.58E-03 | NA       | 1.12E+00 | 1.64E-01 | NA           | NA          | NA                | NA         |
| 1767 | NA       | NA       | NA       | 1.81E+00 | NA       | NA           | NA          | NA                | NA         |
| 1768 | NA       | NA       | NA       | 1.01E+00 | NA       | NA           | NA          | NA                | NA         |
| 1769 | 0.00E+00 | 0.00E+00 | NA       | 4.54E-01 | NA       | NA           | NA          | NA                | NA         |
| 1770 | 5.23E-02 | 0.00E+00 | NA       | 1.16E+00 | 0.00E+00 | NA           | NA          | NA                | NA         |
| 1771 | NA       | NA       | NA       | 3.06E-01 | NA       | NA           | NA          | NA                | NA         |
| 1772 | 5.83E-02 | 8.26E-03 | Inf      | 3.94E+00 | 5.58E-01 | NA           | NA          | (0.0184,Inf]      | (0.192,21] |
| 1773 | 2.65E-02 | 1.20E-02 | 8.17E-02 | 1.75E+00 | 7.95E-01 | (0.0348,Inf] | (1.34,14.9] | (0.000255,0.0184] | (0.192,21] |
| 1774 | NA       | NA       | NA       | 5.00E-01 | NA       | NA           | NA          | NA                | NA         |
| 1775 | NA       | NA       | NA       | 7.70E-01 | NA       | NA           | NA          | NA                | NA         |
| 1776 | NA       | NA       | NA       | 3.56E+00 | NA       | NA           | NA          | NA                | NA         |
| 1777 | 6.12E-03 | 0.00E+00 | NA       | 2.28E-01 | 0.00E+00 | NA           | NA          | NA                | NA         |
| 1778 | 0.00E+00 | 0.00E+00 | NA       | 3.12E-01 | NA       | NA           | NA          | NA                | NA         |
| 1779 | 1.63E-02 | 0.00E+00 | NA       | 7.28E-01 | 0.00E+00 | NA           | NA          | NA                | NA         |
| 1780 | 3.64E-02 | 2.65E-02 | NA       | 9.99E-01 | 7.28E-01 | NA           | NA          | NA                | NA         |
| 1781 | NA       | NA       | NA       | NA       | 1.26E+00 | NA           | NA          | NA                | NA         |
| 1782 | 0.00E+00 | 0.00E+00 | NA       | 2.44E-01 | NA       | NA           | NA          | NA                | NA         |

|      |          |          |          |          |          |              |             |              |            |
|------|----------|----------|----------|----------|----------|--------------|-------------|--------------|------------|
| 1783 | NA       | NA       | NA       | 4.29E-01 | NA       | NA           | NA          | NA           | NA         |
| 1784 | 1.21E-01 | 2.13E-03 | NA       | 4.02E+00 | 7.07E-02 | NA           | NA          | NA           | NA         |
| 1785 | 0.00E+00 | 1.67E-02 | NA       | 9.99E-01 | Inf      | NA           | NA          | NA           | NA         |
| 1786 | 1.45E-02 | 3.18E-02 | 2.98E+00 | 2.84E-01 | 6.24E-01 | (0.0348,Inf] | (14.9,Inf]  | (0.0184,Inf] | (21,Inf]   |
| 1787 | 0.00E+00 | 0.00E+00 | 1.93E+00 | 1.49E-01 | NA       | (0.0348,Inf] | (14.9,Inf]  | (0.0184,Inf] | (21,Inf]   |
| 1788 | 6.95E-03 | 5.80E-02 | 3.89E-01 | 2.93E+00 | 2.45E+01 | (0.0348,Inf] | (14.9,Inf]  | (0.0184,Inf] | (0.192,21] |
| 1789 | 1.96E-02 | 7.87E-02 | NA       | 7.29E-01 | 2.93E+00 | NA           | NA          | NA           | NA         |
| 1790 | NA       | NA       | NA       | 3.53E-01 | NA       | NA           | NA          | NA           | NA         |
| 1791 | 1.38E-02 | 2.49E-02 | NA       | 1.25E+00 | 2.26E+00 | NA           | NA          | NA           | NA         |
| 1792 | NA       | NA       | NA       | 2.54E+00 | NA       | NA           | NA          | NA           | NA         |
| 1793 | NA       | NA       | Inf      | NA       | NA       | NA           | NA          | NA           | (21,Inf]   |
| 1794 | NA       | NA       | Inf      | NA       | NA       | NA           | NA          | NA           | (21,Inf]   |
| 1795 | 0.00E+00 | 1.26E-01 | NA       | 1.46E+00 | Inf      | NA           | NA          | NA           | NA         |
| 1796 | NA       | NA       | NA       | 1.79E+00 | NA       | NA           | NA          | NA           | NA         |
| 1797 | NA       | NA       | NA       | 8.73E-01 | NA       | NA           | NA          | NA           | NA         |
| 1798 | 4.67E-02 | 1.42E-02 | NA       | 1.26E+00 | 3.83E-01 | NA           | NA          | NA           | NA         |
| 1799 | 8.42E-02 | 0.00E+00 | NA       | 3.24E+00 | 0.00E+00 | NA           | NA          | NA           | NA         |
| 1800 | NA       | NA       | NA       | 3.09E-01 | NA       | NA           | NA          | NA           | NA         |
| 1801 | NA       | NA       | NA       | 2.49E+00 | NA       | NA           | NA          | NA           | NA         |
| 1802 | 0.00E+00 | 1.00E-02 | NA       | 9.32E-01 | Inf      | NA           | NA          | NA           | NA         |
| 1803 | NA       | NA       | NA       | 2.07E+00 | NA       | NA           | NA          | NA           | NA         |
| 1804 | 0.00E+00 | 2.46E-03 | NA       | 1.57E+00 | Inf      | NA           | NA          | NA           | NA         |
| 1805 | 2.46E-02 | 9.80E-02 | 4.23E-02 | 2.59E-01 | 1.03E+00 | (0.0348,Inf] | (1.34,14.9] | (0.0184,Inf] | (0.192,21] |
| 1806 | 1.71E-03 | 0.00E+00 | NA       | 1.19E+00 | 0.00E+00 | NA           | NA          | NA           | NA         |
| 1807 | NA       | NA       | NA       | 8.92E-01 | NA       | NA           | NA          | NA           | NA         |
| 1808 | 1.41E-03 | 0.00E+00 | 7.73E+01 | 3.48E-01 | 0.00E+00 | (0.0348,Inf] | (14.9,Inf]  | (0.0184,Inf] | (21,Inf]   |
| 1809 | NA       | NA       | NA       | 1.45E+00 | NA       | NA           | NA          | NA           | NA         |
| 1810 | 2.98E-02 | 0.00E+00 | NA       | 1.01E+00 | 0.00E+00 | NA           | NA          | NA           | NA         |
| 1811 | 3.82E-02 | 1.05E-02 | NA       | 4.14E-01 | 1.13E-01 | NA           | NA          | NA           | NA         |
| 1812 | NA       | NA       | NA       | 1.03E+00 | NA       | NA           | NA          | NA           | NA         |
| 1813 | NA       | NA       | NA       | 0.00E+00 | NA       | NA           | NA          | NA           | NA         |
| 1814 | 6.57E-03 | 0.00E+00 | NA       | 3.30E-01 | 0.00E+00 | NA           | NA          | NA           | NA         |
| 1815 | NA       | NA       | Inf      | NA       | NA       | NA           | NA          | NA           | NA         |
| 1816 | NA       | NA       | NA       | 8.39E-01 | NA       | NA           | NA          | NA           | NA         |
| 1817 | NA       | NA       | NA       | 3.99E-01 | NA       | NA           | NA          | NA           | NA         |
| 1818 | 0.00E+00 | 0.00E+00 | NA       | 8.52E-02 | NA       | NA           | NA          | NA           | NA         |
| 1819 | NA       | NA       | NA       | 4.65E-01 | NA       | NA           | NA          | NA           | NA         |
| 1820 | 0.00E+00 | 3.56E-02 | NA       | 2.63E-01 | Inf      | NA           | NA          | NA           | NA         |



|      |          |          |          |          |          |              |            |              |            |
|------|----------|----------|----------|----------|----------|--------------|------------|--------------|------------|
| 1821 | NA       | NA       | NA       | 3.64E-01 | NA       | NA           | NA         | NA           | NA         |
| 1822 | NA       | NA       | NA       | 1.70E+00 | NA       | NA           | NA         | NA           | NA         |
| 1823 | 3.57E-02 | 0.00E+00 | NA       | 1.77E+00 | 0.00E+00 | NA           | NA         | NA           | NA         |
| 1824 | 8.90E-03 | 6.28E-03 | NA       | 1.63E+00 | 1.15E+00 | NA           | NA         | NA           | NA         |
| 1825 | NA       | NA       | NA       | 1.47E+00 | NA       | NA           | NA         | NA           | NA         |
| 1826 | 1.84E-02 | 1.76E-02 | NA       | 9.94E-01 | 9.52E-01 | NA           | NA         | NA           | NA         |
| 1827 | 0.00E+00 | 1.24E-01 | NA       | 1.97E-01 | Inf      | NA           | NA         | NA           | NA         |
| 1828 | 1.44E-02 | 0.00E+00 | NA       | 2.28E-01 | 0.00E+00 | NA           | NA         | NA           | NA         |
| 1829 | NA       | NA       | NA       | 1.12E+00 | NA       | NA           | NA         | NA           | NA         |
| 1830 | 3.73E-02 | 9.83E-02 | NA       | 3.48E-01 | 9.18E-01 | NA           | NA         | NA           | NA         |
| 1831 | NA       | NA       | NA       | 3.51E-01 | NA       | NA           | NA         | NA           | NA         |
| 1832 | NA       | NA       | NA       | 1.10E+00 | NA       | NA           | NA         | NA           | NA         |
| 1833 | NA       | NA       | NA       | 6.11E-01 | NA       | NA           | NA         | NA           | NA         |
| 1834 | 1.37E-02 | 2.27E-02 | NA       | 1.57E-01 | 2.60E-01 | NA           | NA         | NA           | NA         |
| 1835 | 6.70E-02 | 7.69E-03 | NA       | 2.25E+00 | 2.58E-01 | NA           | NA         | NA           | NA         |
| 1836 | NA       | NA       | NA       | 7.45E-01 | NA       | NA           | NA         | NA           | NA         |
| 1837 | 0.00E+00 | 1.43E-02 | NA       | 7.39E-01 | Inf      | NA           | NA         | NA           | NA         |
| 1838 | NA       | NA       | NA       | 4.05E-01 | NA       | NA           | NA         | NA           | NA         |
| 1839 | NA       | NA       | NA       | 1.87E+00 | NA       | NA           | NA         | NA           | NA         |
| 1840 | 1.64E-02 | 8.42E-02 | NA       | 2.27E-01 | 1.17E+00 | NA           | NA         | NA           | NA         |
| 1841 | 0.00E+00 | 2.12E-02 | Inf      | 2.56E-01 | Inf      | NA           | NA         | (0.0184,Inf] | (0.192,21] |
| 1842 | 2.01E-02 | 0.00E+00 | NA       | 4.56E-01 | 0.00E+00 | NA           | NA         | NA           | NA         |
| 1843 | NA       | NA       | Inf      | NA       | NA       | NA           | NA         | NA           | NA         |
| 1844 | NA       | NA       | NA       | 4.25E-01 | NA       | NA           | NA         | NA           | NA         |
| 1845 | 0.00E+00 | 0.00E+00 | NA       | 4.86E-01 | NA       | NA           | NA         | NA           | NA         |
| 1846 | 4.95E-03 | Inf      | NA       | 0.00E+00 | 3.92E-01 | NA           | NA         | NA           | NA         |
| 1847 | NA       | NA       | NA       | 1.44E+00 | NA       | NA           | NA         | NA           | NA         |
| 1848 | NA       | NA       | NA       | 0.00E+00 | NA       | NA           | NA         | NA           | NA         |
| 1849 | 0.00E+00 | 3.90E-02 | 0.00E+00 | 2.39E-01 | Inf      | (0.0348,Inf] | (14.9,Inf] | NA           | NA         |
| 1850 | 0.00E+00 | 0.00E+00 | NA       | 8.14E-01 | NA       | NA           | NA         | NA           | NA         |
| 1851 | NA       | NA       | NA       | 1.37E+00 | NA       | NA           | NA         | NA           | NA         |
| 1852 | 0.00E+00 | 0.00E+00 | NA       | 3.47E+00 | NA       | NA           | NA         | NA           | NA         |
| 1853 | 7.16E-03 | 2.58E-02 | NA       | 6.35E-01 | 2.29E+00 | NA           | NA         | NA           | NA         |
| 1854 | Inf      | 0.00E+00 | NA       | Inf      | 0.00E+00 | NA           | NA         | NA           | NA         |
| 1855 | 0.00E+00 | 0.00E+00 | Inf      | 5.72E-01 | NA       | NA           | NA         | (0.0184,Inf] | (21,Inf]   |
| 1856 | NA       | NA       | NA       | 2.51E-01 | NA       | NA           | NA         | NA           | NA         |
| 1857 | 0.00E+00 | 7.34E-03 | 0.00E+00 | 6.26E-01 | Inf      | (0.0348,Inf] | (14.9,Inf] | NA           | NA         |
| 1858 | 5.86E-02 | 8.46E-02 | NA       | 1.29E+00 | 1.86E+00 | NA           | NA         | NA           | NA         |

|      |          |          |          |          |          |              |              |              |          |
|------|----------|----------|----------|----------|----------|--------------|--------------|--------------|----------|
| 1859 | 7.08E-03 | 1.14E-02 | NA       | 5.78E-01 | 9.30E-01 | NA           | NA           | NA           | NA       |
| 1860 | NA       | NA       | NA       | 5.80E-01 | NA       | NA           | NA           | NA           | NA       |
| 1861 | NA       | NA       | NA       | 2.41E+00 | NA       | NA           | NA           | NA           | NA       |
| 1862 | NA       | NA       | NA       | 0.00E+00 | NA       | NA           | NA           | NA           | NA       |
| 1863 | NA       | NA       | NA       | Inf      | NA       | NA           | NA           | NA           | NA       |
| 1864 | 9.56E-03 | Inf      | NA       | 0.00E+00 | 2.46E+00 | NA           | NA           | NA           | NA       |
| 1865 | 2.42E-02 | 0.00E+00 | Inf      | 1.72E-01 | 0.00E+00 | NA           | NA           | (0.0184,Inf] | (21,Inf] |
| 1866 | 4.29E-02 | 0.00E+00 | NA       | 4.54E-01 | 0.00E+00 | NA           | NA           | NA           | NA       |
| 1867 | NA       | NA       | 0.00E+00 | NA       | 1.18E+00 | NA           | (0.101,1.34] | NA           | NA       |
| 1868 | 6.70E-03 | 7.74E-03 | NA       | 2.55E+00 | 2.94E+00 | NA           | NA           | NA           | NA       |
| 1869 | 0.00E+00 | 1.24E-02 | NA       | 6.00E-01 | Inf      | NA           | NA           | NA           | NA       |
| 1870 | 9.73E-03 | 0.00E+00 | NA       | 4.40E-01 | 0.00E+00 | NA           | NA           | NA           | NA       |
| 1871 | NA       | NA       | NA       | 5.86E-01 | NA       | NA           | NA           | NA           | NA       |
| 1872 | 4.61E-02 | 3.29E-02 | 0.00E+00 | 1.01E+00 | 7.23E-01 | (0.0348,Inf] | (1.34,14.9]  | NA           | NA       |
| 1873 | 3.32E-02 | 0.00E+00 | NA       | 4.23E-01 | 0.00E+00 | NA           | NA           | NA           | NA       |
| 1874 | NA       | 7.51E-03 | 0.00E+00 | Inf      | Inf      | (0.0348,Inf] | (14.9,Inf]   | NA           | NA       |
| 1875 | 1.90E-02 | 2.13E-02 | NA       | 2.53E+00 | 2.83E+00 | NA           | NA           | NA           | NA       |
| 1876 | NA       | NA       | NA       | 7.55E-01 | NA       | NA           | NA           | NA           | NA       |
| 1877 | 0.00E+00 | 0.00E+00 | NA       | 1.30E+00 | NA       | NA           | NA           | NA           | NA       |
| 1878 | NA       | NA       | NA       | 7.79E-01 | NA       | NA           | NA           | NA           | NA       |
| 1879 | 7.29E-03 | 0.00E+00 | NA       | 1.44E+00 | 0.00E+00 | NA           | NA           | NA           | NA       |
| 1880 | NA       | NA       | NA       | 2.56E-01 | NA       | NA           | NA           | NA           | NA       |
| 1881 | NA       | NA       | NA       | 0.00E+00 | NA       | NA           | NA           | NA           | NA       |
| 1882 | 0.00E+00 | 8.99E-02 | NA       | 1.48E-01 | Inf      | NA           | NA           | NA           | NA       |
| 1883 | NA       | NA       | Inf      | 7.19E-01 | NA       | NA           | NA           | (0.0184,Inf] | NA       |
| 1884 | 1.22E-01 | 3.00E-02 | NA       | 2.06E+00 | 5.10E-01 | NA           | NA           | NA           | NA       |
| 1885 | 2.75E-02 | 0.00E+00 | NA       | 1.19E+00 | 0.00E+00 | NA           | NA           | NA           | NA       |
| 1886 | NA       | NA       | NA       | 1.35E+00 | NA       | NA           | NA           | NA           | NA       |
| 1887 | NA       | NA       | NA       | 7.07E-01 | NA       | NA           | NA           | NA           | NA       |
| 1888 | NA       | NA       | NA       | 1.39E+00 | NA       | NA           | NA           | NA           | NA       |
| 1889 | 1.41E-02 | 2.69E-02 | NA       | 9.93E-01 | 1.90E+00 | NA           | NA           | NA           | NA       |
| 1890 | 9.40E-02 | 3.56E-02 | 0.00E+00 | 3.46E+00 | 1.31E+00 | (0.0348,Inf] | (1.34,14.9]  | NA           | NA       |
| 1891 | NA       | NA       | NA       | 3.28E-01 | NA       | NA           | NA           | NA           | NA       |
| 1892 | NA       | NA       | NA       | 8.39E+00 | NA       | NA           | NA           | NA           | NA       |
| 1893 | 4.10E-02 | 0.00E+00 | NA       | 7.69E-01 | 0.00E+00 | NA           | NA           | NA           | NA       |
| 1894 | 0.00E+00 | 0.00E+00 | NA       | 2.23E-01 | NA       | NA           | NA           | NA           | NA       |
| 1895 | 1.02E-02 | 0.00E+00 | NA       | 7.65E-01 | 0.00E+00 | NA           | NA           | NA           | NA       |
| 1896 | NA       | NA       | NA       | 1.61E-01 | NA       | NA           | NA           | NA           | NA       |

|      |          |          |          |          |          |              |              |              |            |
|------|----------|----------|----------|----------|----------|--------------|--------------|--------------|------------|
| 1897 | NA       | NA       | NA       | 3.57E-01 | NA       | NA           | NA           | NA           | NA         |
| 1898 | NA       | NA       | Inf      | NA       | 9.55E-01 | NA           | NA           | NA           | (0.192,21] |
| 1899 | 5.64E-02 | 3.05E-02 | NA       | 2.78E-01 | 1.50E-01 | NA           | NA           | NA           | NA         |
| 1900 | NA       | NA       | NA       | 0.00E+00 | NA       | NA           | NA           | NA           | NA         |
| 1901 | NA       | NA       | NA       | 3.87E-01 | NA       | NA           | NA           | NA           | NA         |
| 1902 | NA       | NA       | NA       | 6.85E-01 | NA       | NA           | NA           | NA           | NA         |
| 1903 | 3.17E-02 | 1.91E-01 | 0.00E+00 | 6.45E-01 | 3.89E+00 | (0.0348,Inf] | (14.9,Inf]   | NA           | NA         |
| 1904 | 0.00E+00 | 1.75E-01 | 0.00E+00 | 1.75E-01 | Inf      | (0.0348,Inf] | (14.9,Inf]   | NA           | NA         |
| 1905 | 3.59E-02 | 0.00E+00 | NA       | 7.07E-01 | 0.00E+00 | NA           | NA           | NA           | NA         |
| 1906 | NA       | NA       | NA       | 6.67E-01 | NA       | NA           | NA           | NA           | NA         |
| 1907 | NA       | NA       | NA       | 7.69E-01 | NA       | NA           | NA           | NA           | NA         |
| 1908 | NA       | NA       | Inf      | NA       | NA       | NA           | NA           | NA           | NA         |
| 1909 | NA       | NA       | NA       | 6.40E-02 | NA       | NA           | NA           | NA           | NA         |
| 1910 | NA       | NA       | NA       | 8.05E-01 | NA       | NA           | NA           | NA           | NA         |
| 1911 | 0.00E+00 | 1.16E-02 | NA       | 6.08E-01 | Inf      | NA           | NA           | NA           | NA         |
| 1912 | 1.57E-02 | 1.14E-02 | NA       | 1.63E+00 | 1.19E+00 | NA           | NA           | NA           | NA         |
| 1913 | 6.41E-02 | 0.00E+00 | NA       | 1.86E+00 | 0.00E+00 | NA           | NA           | NA           | NA         |
| 1914 | 2.96E-02 | 2.28E-02 | 4.52E+01 | 6.62E-01 | 5.09E-01 | (0.0348,Inf] | (1.34,14.9]  | (0.0184,Inf] | (21,Inf]   |
| 1915 | 0.00E+00 | Inf      | 6.65E+00 | 0.00E+00 | Inf      | (0.0348,Inf] | (14.9,Inf]   | (0.0184,Inf] | (21,Inf]   |
| 1916 | 1.11E-01 | 3.37E-02 | 0.00E+00 | 1.11E+00 | 3.40E-01 | (0.0348,Inf] | (0.101,1.34] | NA           | NA         |
| 1917 | 0.00E+00 | 0.00E+00 | Inf      | 1.02E+00 | NA       | NA           | NA           | (0.0184,Inf] | (21,Inf]   |
| 1918 | 0.00E+00 | Inf      | NA       | 0.00E+00 | Inf      | NA           | NA           | NA           | NA         |
| 1919 | NA       | NA       | NA       | 1.78E-01 | NA       | NA           | NA           | NA           | NA         |
| 1920 | 3.42E-02 | Inf      | NA       | 0.00E+00 | 1.59E+00 | NA           | NA           | NA           | NA         |
| 1921 | 1.77E-02 | Inf      | Inf      | 0.00E+00 | 5.89E-01 | NA           | NA           | (0.0184,Inf] | (0.192,21] |
| 1922 | 0.00E+00 | 0.00E+00 | Inf      | 3.35E+00 | NA       | NA           | NA           | (0.0184,Inf] | (21,Inf]   |
| 1923 | 0.00E+00 | NA       | NA       | 0.00E+00 | NA       | NA           | NA           | NA           | NA         |
| 1924 | 2.98E-02 | 0.00E+00 | 8.98E-01 | 2.54E+00 | 0.00E+00 | (0.0348,Inf] | (14.9,Inf]   | (0.0184,Inf] | (21,Inf]   |
| 1925 | 0.00E+00 | 5.02E-02 | NA       | 8.31E-01 | Inf      | NA           | NA           | NA           | NA         |
| 1926 | 6.21E-01 | 4.96E-02 | 0.00E+00 | 2.67E+00 | 2.13E-01 | (0.0348,Inf] | (0.101,1.34] | NA           | NA         |
| 1927 | NA       | NA       | Inf      | NA       | NA       | NA           | NA           | NA           | (21,Inf]   |
| 1928 | NA       | NA       | NA       | 3.28E-01 | NA       | NA           | NA           | NA           | NA         |
| 1929 | 4.37E-01 | 0.00E+00 | NA       | 1.63E+00 | 0.00E+00 | NA           | NA           | NA           | NA         |
| 1930 | NA       | NA       | NA       | 1.73E-01 | NA       | NA           | NA           | NA           | NA         |
| 1931 | 8.38E-03 | 0.00E+00 | NA       | 5.30E-01 | 0.00E+00 | NA           | NA           | NA           | NA         |
| 1932 | Inf      | 0.00E+00 | NA       | Inf      | 0.00E+00 | NA           | NA           | NA           | NA         |
| 1933 | NA       | NA       | Inf      | NA       | NA       | NA           | NA           | NA           | (21,Inf]   |
| 1934 | 4.93E-02 | 3.09E-02 | NA       | 2.21E+00 | 1.38E+00 | NA           | NA           | NA           | NA         |

|      |          |          |          |          |          |              |             |              |            |
|------|----------|----------|----------|----------|----------|--------------|-------------|--------------|------------|
| 1935 | 4.42E-02 | 0.00E+00 | NA       | 1.17E+00 | 0.00E+00 | NA           | NA          | NA           | NA         |
| 1936 | 8.09E-02 | 0.00E+00 | NA       | 7.82E-01 | 0.00E+00 | NA           | NA          | NA           | NA         |
| 1937 | 2.95E-03 | 1.34E+00 | 1.60E+00 | 1.31E-01 | 5.94E+01 | (0.0348,Inf] | (14.9,Inf]  | (0.0184,Inf] | (0.192,21] |
| 1938 | 1.99E-02 | 1.99E-02 | NA       | 1.01E+00 | 1.01E+00 | NA           | NA          | NA           | NA         |
| 1939 | NA       | NA       | NA       | 3.43E-01 | NA       | NA           | NA          | NA           | NA         |
| 1940 | 0.00E+00 | 0.00E+00 | NA       | 5.71E-01 | NA       | NA           | NA          | NA           | NA         |
| 1941 | 1.59E-02 | 0.00E+00 | NA       | 1.30E+00 | 0.00E+00 | NA           | NA          | NA           | NA         |
| 1942 | NA       | NA       | NA       | 2.84E+00 | NA       | NA           | NA          | NA           | NA         |
| 1943 | NA       | NA       | NA       | 6.31E-01 | NA       | NA           | NA          | NA           | NA         |
| 1944 | NA       | NA       | NA       | 0.00E+00 | NA       | NA           | NA          | NA           | NA         |
| 1945 | 0.00E+00 | 0.00E+00 | NA       | 2.09E-01 | NA       | NA           | NA          | NA           | NA         |
| 1946 | NA       | NA       | Inf      | NA       | NA       | NA           | NA          | NA           | NA         |
| 1947 | NA       | NA       | NA       | 0.00E+00 | NA       | NA           | NA          | NA           | NA         |
| 1948 | NA       | NA       | NA       | 7.23E-01 | NA       | NA           | NA          | NA           | NA         |
| 1949 | 0.00E+00 | 2.03E-02 | NA       | 1.02E+00 | Inf      | NA           | NA          | NA           | NA         |
| 1950 | NA       | NA       | Inf      | NA       | NA       | NA           | NA          | NA           | NA         |
| 1951 | 9.14E-03 | Inf      | NA       | 0.00E+00 | 1.75E+00 | NA           | NA          | NA           | NA         |
| 1952 | NA       | NA       | NA       | 0.00E+00 | NA       | NA           | NA          | NA           | NA         |
| 1953 | NA       | NA       | NA       | Inf      | NA       | NA           | NA          | NA           | NA         |
| 1954 | 5.58E-03 | 2.41E-02 | NA       | 1.54E+00 | 6.62E+00 | NA           | NA          | NA           | NA         |
| 1955 | 0.00E+00 | 5.52E-03 | NA       | 8.12E+00 | Inf      | NA           | NA          | NA           | NA         |
| 1956 | NA       | NA       | NA       | NA       | Inf      | NA           | NA          | NA           | NA         |
| 1957 | NA       | 5.53E-02 | 0.00E+00 | Inf      | Inf      | (0.0348,Inf] | (14.9,Inf]  | NA           | NA         |
| 1958 | 0.00E+00 | NA       | NA       | 0.00E+00 | NA       | NA           | NA          | NA           | NA         |
| 1959 | 0.00E+00 | 1.51E-01 | 3.22E-02 | 2.87E-01 | Inf      | (0.0348,Inf] | (14.9,Inf]  | (0.0184,Inf] | (0.192,21] |
| 1960 | 0.00E+00 | Inf      | NA       | 0.00E+00 | Inf      | NA           | NA          | NA           | NA         |
| 1961 | NA       | NA       | NA       | 0.00E+00 | NA       | NA           | NA          | NA           | NA         |
| 1962 | NA       | NA       | NA       | 1.68E-01 | NA       | NA           | NA          | NA           | NA         |
| 1963 | NA       | NA       | NA       | 8.10E-01 | NA       | NA           | NA          | NA           | NA         |
| 1964 | NA       | NA       | NA       | 7.37E-01 | NA       | NA           | NA          | NA           | NA         |
| 1965 | NA       | NA       | NA       | 8.69E-01 | NA       | NA           | NA          | NA           | NA         |
| 1966 | 0.00E+00 | 0.00E+00 | NA       | 1.91E-01 | NA       | NA           | NA          | NA           | NA         |
| 1967 | 2.78E-02 | 7.14E-02 | 5.70E+00 | 1.60E+00 | 4.11E+00 | (0.0348,Inf] | (1.34,14.9] | (0.0184,Inf] | (0.192,21] |
| 1968 | NA       | NA       | NA       | 5.51E-01 | NA       | NA           | NA          | NA           | NA         |
| 1969 | NA       | NA       | NA       | 2.17E-01 | NA       | NA           | NA          | NA           | NA         |
| 1970 | 3.01E-02 | 1.25E-01 | 0.00E+00 | 1.73E+00 | 7.17E+00 | (0.0348,Inf] | (14.9,Inf]  | NA           | NA         |
| 1971 | NA       | 7.12E-03 | 0.00E+00 | Inf      | Inf      | (0.0348,Inf] | (14.9,Inf]  | NA           | NA         |
| 1972 | NA       | NA       | Inf      | NA       | NA       | NA           | NA          | NA           | (21,Inf]   |

|      |          |          |          |          |          |              |             |              |            |
|------|----------|----------|----------|----------|----------|--------------|-------------|--------------|------------|
| 1973 | 3.42E-02 | 4.83E-01 | 1.36E-02 | 2.57E-01 | 3.63E+00 | (0.0348,Inf] | (14.9,Inf]  | (0.0184,Inf] | (0.192,21] |
| 1974 | NA       | NA       | NA       | NA       | Inf      | NA           | NA          | NA           | NA         |
| 1975 | NA       | NA       | 0.00E+00 | NA       | 2.37E+01 | NA           | (14.9,Inf]  | NA           | NA         |
| 1976 | NA       | NA       | NA       | 3.43E-01 | NA       | NA           | NA          | NA           | NA         |
| 1977 | NA       | NA       | NA       | NA       | 8.88E-01 | NA           | NA          | NA           | NA         |
| 1978 | NA       | NA       | Inf      | NA       | NA       | NA           | NA          | NA           | (21,Inf]   |
| 1979 | Inf      | 0.00E+00 | NA       | Inf      | 0.00E+00 | NA           | NA          | NA           | NA         |
| 1980 | 9.91E-02 | 0.00E+00 | NA       | 1.54E+00 | 0.00E+00 | NA           | NA          | NA           | NA         |
| 1981 | 0.00E+00 | 1.11E-01 | NA       | 3.64E-01 | Inf      | NA           | NA          | NA           | NA         |
| 1982 | NA       | NA       | Inf      | NA       | NA       | NA           | NA          | NA           | (21,Inf]   |
| 1983 | NA       | NA       | NA       | 1.11E+01 | NA       | NA           | NA          | NA           | NA         |
| 1984 | NA       | NA       | Inf      | NA       | NA       | NA           | NA          | NA           | (21,Inf]   |
| 1985 | NA       | NA       | NA       | 3.13E+00 | NA       | NA           | NA          | NA           | NA         |
| 1986 | 1.14E-01 | 8.64E-02 | 0.00E+00 | 7.97E-01 | 6.03E-01 | (0.0348,Inf] | (1.34,14.9] | NA           | NA         |
| 1987 | Inf      | 2.88E-02 | Inf      | Inf      | 3.46E-01 | NA           | NA          | (0.0184,Inf] | (0.192,21] |
| 1988 | NA       | NA       | NA       | 2.64E+00 | NA       | NA           | NA          | NA           | NA         |
| 1989 | NA       | NA       | NA       | 0.00E+00 | NA       | NA           | NA          | NA           | NA         |
| 1990 | NA       | NA       | Inf      | 1.64E+00 | NA       | NA           | NA          | (0.0184,Inf] | NA         |
| 1991 | NA       | NA       | NA       | NA       | 3.98E-01 | NA           | NA          | NA           | NA         |
| 1992 | NA       | NA       | NA       | 0.00E+00 | NA       | NA           | NA          | NA           | NA         |
| 1993 | 1.99E-01 | 1.26E-01 | Inf      | 1.78E+00 | 1.13E+00 | NA           | NA          | (0.0184,Inf] | (0.192,21] |
| 1994 | NA       | NA       | 7.73E-01 | NA       | 3.34E+01 | NA           | (14.9,Inf]  | NA           | (0.192,21] |
| 1995 | NA       | NA       | Inf      | NA       | NA       | NA           | NA          | NA           | (21,Inf]   |
| 1996 | NA       | NA       | Inf      | NA       | NA       | NA           | NA          | NA           | (21,Inf]   |
| 1997 | NA       | NA       | NA       | 0.00E+00 | NA       | NA           | NA          | NA           | NA         |
| 1998 | NA       | NA       | 0.00E+00 | NA       | NA       | NA           | (14.9,Inf]  | NA           | NA         |
| 1999 | 3.56E-02 | NA       | NA       | 0.00E+00 | 0.00E+00 | NA           | NA          | NA           | NA         |
| 2000 | NA       | NA       | NA       | 4.49E-01 | NA       | NA           | NA          | NA           | NA         |
| 2001 | NA       | NA       | NA       | Inf      | NA       | NA           | NA          | NA           | NA         |
| 2002 | NA       | NA       | 0.00E+00 | NA       | NA       | NA           | NA          | NA           | NA         |
| 2003 | NA       | NA       | Inf      | NA       | NA       | NA           | NA          | NA           | (21,Inf]   |
| 2004 | 1.35E-02 | 2.33E-02 | NA       | 3.92E-01 | 6.76E-01 | NA           | NA          | NA           | NA         |
| 2005 | NA       | NA       | Inf      | NA       | NA       | NA           | NA          | NA           | NA         |
| 2006 | NA       | NA       | NA       | 0.00E+00 | NA       | NA           | NA          | NA           | NA         |
| 2007 | 3.00E-02 | NA       | NA       | 0.00E+00 | 0.00E+00 | NA           | NA          | NA           | NA         |
| 2008 | 0.00E+00 | NA       | NA       | 0.00E+00 | NA       | NA           | NA          | NA           | NA         |
| 2009 | 8.38E-02 | 0.00E+00 | Inf      | 9.87E-01 | 0.00E+00 | NA           | NA          | (0.0184,Inf] | (21,Inf]   |
| 2010 | NA       | NA       | NA       | 4.25E-01 | NA       | NA           | NA          | NA           | NA         |

|      |          |          |          |          |          |    |              |              |            |
|------|----------|----------|----------|----------|----------|----|--------------|--------------|------------|
| 2011 | NA       | NA       | NA       | 0.00E+00 | NA       | NA | NA           | NA           | NA         |
| 2012 | NA       | 1.33E-02 | NA       | Inf      | Inf      | NA | NA           | NA           | NA         |
| 2013 | NA       | NA       | Inf      | NA       | NA       | NA | NA           | NA           | (21,Inf]   |
| 2014 | NA       | NA       | NA       | NA       | 3.49E-01 | NA | NA           | NA           | NA         |
| 2015 | NA       | NA       | NA       | NA       | 1.77E+00 | NA | NA           | NA           | NA         |
| 2016 | NA       | NA       | Inf      | NA       | NA       | NA | NA           | NA           | (21,Inf]   |
| 2017 | Inf      | 5.28E-02 | Inf      | Inf      | 9.59E-01 | NA | NA           | (0.0184,Inf] | (0.192,21] |
| 2018 | 0.00E+00 | 0.00E+00 | Inf      | 1.18E+00 | NA       | NA | NA           | (0.0184,Inf] | (21,Inf]   |
| 2019 | NA       | NA       | Inf      | NA       | NA       | NA | NA           | NA           | (21,Inf]   |
| 2020 | NA       | NA       | Inf      | NA       | NA       | NA | NA           | NA           | (21,Inf]   |
| 2021 | NA       | NA       | Inf      | NA       | NA       | NA | NA           | NA           | (21,Inf]   |
| 2022 | NA       | NA       | 0.00E+00 | NA       | NA       | NA | NA           | NA           | NA         |
| 2023 | NA       | NA       | Inf      | 3.90E-01 | NA       | NA | NA           | (0.0184,Inf] | NA         |
| 2024 | NA       | NA       | NA       | NA       | 8.24E-01 | NA | NA           | NA           | NA         |
| 2025 | NA       | NA       | Inf      | NA       | NA       | NA | NA           | NA           | NA         |
| 2026 | NA       | NA       | NA       | 0.00E+00 | NA       | NA | NA           | NA           | NA         |
| 2027 | Inf      | 2.04E-02 | NA       | Inf      | 8.92E-01 | NA | NA           | NA           | NA         |
| 2028 | NA       | NA       | 1.05E+00 | NA       | 9.08E-01 | NA | (0.101,1.34] | NA           | (0.192,21] |
| 2029 | NA       | NA       | NA       | 0.00E+00 | NA       | NA | NA           | NA           | NA         |
| 2030 | NA       | NA       | Inf      | NA       | NA       | NA | NA           | NA           | (21,Inf]   |
| 2031 | NA       | NA       | 0.00E+00 | NA       | 5.75E-01 | NA | (0,0.101]    | NA           | NA         |
| 2032 | 0.00E+00 | NA       | NA       | 0.00E+00 | NA       | NA | NA           | NA           | NA         |
| 2033 | NA       | NA       | NA       | NA       | 5.37E+00 | NA | NA           | NA           | NA         |
| 2034 | NA       | NA       | NA       | NA       | 4.32E-01 | NA | NA           | NA           | NA         |
| 2035 | NA       | NA       | Inf      | NA       | NA       | NA | NA           | NA           | NA         |
| 2036 | NA       | NA       | Inf      | NA       | NA       | NA | NA           | NA           | NA         |
| 2037 | NA       | NA       | Inf      | NA       | NA       | NA | NA           | NA           | NA         |
| 2038 | NA       | NA       | NA       | NA       | 8.24E-02 | NA | NA           | NA           | NA         |
| 2039 | NA       | NA       | 0.00E+00 | NA       | 1.73E-01 | NA | (1.34,14.9]  | NA           | NA         |
| 2040 | NA       | NA       | 0.00E+00 | NA       | 3.47E-01 | NA | (0.101,1.34] | NA           | NA         |
| 2041 | NA       | NA       | NA       | Inf      | NA       | NA | NA           | NA           | NA         |
| 2042 | NA       | NA       | NA       | NA       | 6.54E-01 | NA | NA           | NA           | NA         |
| 2043 | NA       | NA       | Inf      | NA       | NA       | NA | NA           | NA           | (21,Inf]   |
| 2044 | NA       | 0.00E+00 | NA       | Inf      | NA       | NA | NA           | NA           | NA         |
| 2045 | NA       | NA       | 0.00E+00 | NA       | 1.47E+01 | NA | (0.101,1.34] | NA           | NA         |
| 2046 | NA       | NA       | NA       | NA       | Inf      | NA | NA           | NA           | NA         |
| 2047 | NA       | NA       | Inf      | NA       | NA       | NA | NA           | NA           | (21,Inf]   |
| 2048 | NA       | NA       | Inf      | NA       | NA       | NA | NA           | NA           | (21,Inf]   |

|      |     |          |          |          |          |              |              |    |            |
|------|-----|----------|----------|----------|----------|--------------|--------------|----|------------|
| 2049 | NA  | NA       | Inf      | NA       | NA       | NA           | NA           | NA | (21,Inf]   |
| 2050 | NA  | NA       | Inf      | NA       | NA       | NA           | NA           | NA | (21,Inf]   |
| 2051 | NA  | NA       | 0.00E+00 | NA       | NA       | NA           | NA           | NA | NA         |
| 2052 | Inf | 8.92E-02 | 0.00E+00 | Inf      | 3.25E-01 | (0.0348,Inf] | (0.101,1.34] | NA | NA         |
| 2053 | NA  | NA       | Inf      | NA       | NA       | NA           | NA           | NA | NA         |
| 2054 | NA  | NA       | NA       | Inf      | NA       | NA           | NA           | NA | NA         |
| 2055 | NA  | NA       | Inf      | NA       | NA       | NA           | NA           | NA | (21,Inf]   |
| 2056 | NA  | NA       | Inf      | NA       | NA       | NA           | NA           | NA | (21,Inf]   |
| 2057 | NA  | NA       | NA       | NA       | 2.94E+00 | NA           | NA           | NA | NA         |
| 2058 | NA  | NA       | Inf      | NA       | NA       | NA           | NA           | NA | (21,Inf]   |
| 2059 | NA  | NA       | Inf      | NA       | NA       | NA           | NA           | NA | (21,Inf]   |
| 2060 | NA  | NA       | Inf      | NA       | NA       | NA           | NA           | NA | (21,Inf]   |
| 2061 | NA  | NA       | Inf      | NA       | NA       | NA           | NA           | NA | NA         |
| 2062 | NA  | NA       | Inf      | NA       | NA       | NA           | NA           | NA | (21,Inf]   |
| 2063 | NA  | NA       | 0.00E+00 | NA       | NA       | NA           | (14.9,Inf]   | NA | NA         |
| 2064 | NA  | NA       | NA       | 0.00E+00 | NA       | NA           | NA           | NA | NA         |
| 2065 | NA  | NA       | NA       | NA       | 3.29E-01 | NA           | NA           | NA | NA         |
| 2066 | NA  | NA       | 0.00E+00 | NA       | NA       | NA           | NA           | NA | NA         |
| 2067 | NA  | NA       | Inf      | NA       | NA       | NA           | NA           | NA | (21,Inf]   |
| 2068 | NA  | NA       | Inf      | NA       | 6.06E-01 | NA           | NA           | NA | (0.192,21] |
| 2069 | NA  | NA       | NA       | NA       | 2.52E-02 | NA           | NA           | NA | NA         |
| 2070 | NA  | NA       | 0.00E+00 | NA       | NA       | NA           | NA           | NA | NA         |
| 2071 | NA  | NA       | 0.00E+00 | NA       | NA       | NA           | NA           | NA | NA         |
| 2072 | NA  | NA       | NA       | NA       | 8.06E-01 | NA           | NA           | NA | NA         |
| 2073 | NA  | NA       | NA       | Inf      | NA       | NA           | NA           | NA | NA         |
| 2074 | NA  | NA       | Inf      | NA       | NA       | NA           | NA           | NA | NA         |
| 2075 | NA  | NA       | Inf      | NA       | NA       | NA           | NA           | NA | NA         |
| 2076 | NA  | NA       | 0.00E+00 | NA       | 8.38E+00 | NA           | (14.9,Inf]   | NA | NA         |
| 2077 | NA  | NA       | Inf      | NA       | NA       | NA           | NA           | NA | NA         |
| 2078 | NA  | NA       | Inf      | NA       | NA       | NA           | NA           | NA | NA         |
| 2079 | NA  | NA       | Inf      | NA       | NA       | NA           | NA           | NA | NA         |
| 2080 | NA  | NA       | 0.00E+00 | NA       | NA       | NA           | NA           | NA | NA         |
| 2081 | NA  | NA       | NA       | NA       | 1.42E+00 | NA           | NA           | NA | NA         |
| 2082 | NA  | NA       | NA       | NA       | 1.30E+00 | NA           | NA           | NA | NA         |
| 2083 | NA  | NA       | NA       | NA       | 3.11E-01 | NA           | NA           | NA | NA         |
| 2084 | NA  | NA       | Inf      | NA       | NA       | NA           | NA           | NA | (21,Inf]   |
| 2085 | NA  | NA       | 2.77E-01 | NA       | 1.54E+00 | NA           | (14.9,Inf]   | NA | (21,Inf]   |
| 2086 | NA  | NA       | NA       | NA       | 1.43E+00 | NA           | NA           | NA | NA         |

|      |    |    |          |          |          |    |             |    |            |
|------|----|----|----------|----------|----------|----|-------------|----|------------|
| 2087 | NA | NA | 0.00E+00 | NA       | NA       | NA | NA          | NA | NA         |
| 2088 | NA | NA | NA       | NA       | 9.19E-01 | NA | NA          | NA | NA         |
| 2089 | NA | NA | 0.00E+00 | NA       | NA       | NA | NA          | NA | NA         |
| 2090 | NA | NA | NA       | NA       | 9.84E-01 | NA | NA          | NA | NA         |
| 2091 | NA | NA | NA       | NA       | 2.56E+00 | NA | NA          | NA | NA         |
| 2092 | NA | NA | 5.34E-02 | NA       | 4.77E+00 | NA | (14.9,Inf]  | NA | (0.192,21] |
| 2093 | NA | NA | NA       | NA       | 1.96E-01 | NA | NA          | NA | NA         |
| 2094 | NA | NA | 0.00E+00 | NA       | 1.03E+00 | NA | (1.34,14.9] | NA | NA         |
| 2095 | NA | NA | 0.00E+00 | NA       | 4.37E+00 | NA | (14.9,Inf]  | NA | NA         |
| 2096 | NA | NA | Inf      | NA       | NA       | NA | NA          | NA | NA         |
| 2097 | NA | NA | NA       | NA       | 3.08E-01 | NA | NA          | NA | NA         |
| 2098 | NA | NA | Inf      | NA       | NA       | NA | NA          | NA | NA         |
| 2099 | NA | NA | NA       | 0.00E+00 | NA       | NA | NA          | NA | NA         |
| 2100 | NA | NA | 1.01E+00 | NA       | 3.95E-01 | NA | (1.34,14.9] | NA | (0.192,21] |
| 2101 | NA | NA | 1.01E+00 | NA       | 3.95E-01 | NA | (1.34,14.9] | NA | (0.192,21] |
| 2102 | NA | NA | 0.00E+00 | NA       | 1.35E+01 | NA | (14.9,Inf]  | NA | NA         |
| 2103 | NA | NA | Inf      | NA       | NA       | NA | NA          | NA | (21,Inf]   |
| 2104 | NA | NA | 0.00E+00 | NA       | NA       | NA | NA          | NA | NA         |
| 2105 | NA | NA | 0.00E+00 | NA       | NA       | NA | NA          | NA | NA         |
| 2106 | NA | NA | Inf      | NA       | NA       | NA | NA          | NA | NA         |
| 2107 | NA | NA | NA       | NA       | 1.69E-01 | NA | NA          | NA | NA         |
| 2108 | NA | NA | 0.00E+00 | NA       | NA       | NA | NA          | NA | NA         |
| 2109 | NA | NA | Inf      | NA       | NA       | NA | NA          | NA | NA         |
| 2110 | NA | NA | Inf      | NA       | NA       | NA | NA          | NA | NA         |
| 2111 | NA | NA | Inf      | NA       | NA       | NA | NA          | NA | NA         |
| 2112 | NA | NA | Inf      | NA       | NA       | NA | NA          | NA | (21,Inf]   |
| 2113 | NA | NA | 0.00E+00 | NA       | NA       | NA | NA          | NA | NA         |
| 2114 | NA | NA | 1.29E+01 | NA       | Inf      | NA | (14.9,Inf]  | NA | (21,Inf]   |
| 2115 | NA | NA | 0.00E+00 | NA       | 3.94E+00 | NA | (14.9,Inf]  | NA | NA         |
| 2116 | NA | NA | NA       | Inf      | NA       | NA | NA          | NA | NA         |
| 2117 | NA | NA | NA       | NA       | 5.61E-01 | NA | NA          | NA | NA         |
| 2118 | NA | NA | Inf      | NA       | NA       | NA | NA          | NA | (21,Inf]   |
| 2119 | NA | NA | NA       | NA       | 6.54E-02 | NA | NA          | NA | NA         |
| 2120 | NA | NA | Inf      | NA       | NA       | NA | NA          | NA | (21,Inf]   |
| 2121 | NA | NA | 1.04E+00 | NA       | 1.32E+01 | NA | (14.9,Inf]  | NA | (0.192,21] |
| 2122 | NA | NA | NA       | NA       | 1.12E+00 | NA | NA          | NA | NA         |
| 2123 | NA | NA | Inf      | NA       | NA       | NA | NA          | NA | NA         |
| 2124 | NA | NA | Inf      | NA       | NA       | NA | NA          | NA | NA         |



|      |    |    |          |    |          |    |             |    |          |
|------|----|----|----------|----|----------|----|-------------|----|----------|
| 2125 | NA | NA | Inf      | NA | NA       | NA | NA          | NA | (21,Inf] |
| 2126 | NA | NA | NA       | NA | 0.00E+00 | NA | NA          | NA | NA       |
| 2127 | NA | NA | Inf      | NA | NA       | NA | NA          | NA | NA       |
| 2128 | NA | NA | 0.00E+00 | NA | NA       | NA | NA          | NA | NA       |
| 2129 | NA | NA | NA       | NA | 2.61E-01 | NA | NA          | NA | NA       |
| 2130 | NA | NA | NA       | NA | 1.30E-01 | NA | NA          | NA | NA       |
| 2131 | NA | NA | 0.00E+00 | NA | NA       | NA | NA          | NA | NA       |
| 2132 | NA | NA | Inf      | NA | NA       | NA | NA          | NA | (21,Inf] |
| 2133 | NA | NA | 0.00E+00 | NA | NA       | NA | NA          | NA | NA       |
| 2134 | NA | NA | 0.00E+00 | NA | NA       | NA | NA          | NA | NA       |
| 2135 | NA | NA | Inf      | NA | NA       | NA | NA          | NA | NA       |
| 2136 | NA | NA | 0.00E+00 | NA | NA       | NA | NA          | NA | NA       |
| 2137 | NA | NA | Inf      | NA | NA       | NA | NA          | NA | NA       |
| 2138 | NA | NA | NA       | NA | 5.64E+00 | NA | NA          | NA | NA       |
| 2139 | NA | NA | NA       | NA | 3.57E-01 | NA | NA          | NA | NA       |
| 2140 | NA | NA | 0.00E+00 | NA | NA       | NA | NA          | NA | NA       |
| 2141 | NA | NA | NA       | NA | 7.95E-02 | NA | NA          | NA | NA       |
| 2142 | NA | NA | Inf      | NA | NA       | NA | NA          | NA | NA       |
| 2143 | NA | NA | Inf      | NA | NA       | NA | NA          | NA | NA       |
| 2144 | NA | NA | 0.00E+00 | NA | NA       | NA | NA          | NA | NA       |
| 2145 | NA | NA | 0.00E+00 | NA | 1.03E+00 | NA | (1.34,14.9] | NA | NA       |
| 2146 | NA | NA | Inf      | NA | NA       | NA | NA          | NA | (21,Inf] |
| 2147 | NA | NA | 0.00E+00 | NA | Inf      | NA | (14.9,Inf]  | NA | NA       |
| 2148 | NA | NA | NA       | NA | 1.19E-01 | NA | NA          | NA | NA       |
| 2149 | NA | NA | NA       | NA | 0.00E+00 | NA | NA          | NA | NA       |
| 2150 | NA | NA | Inf      | NA | NA       | NA | NA          | NA | (21,Inf] |
| 2151 | NA | NA | 0.00E+00 | NA | NA       | NA | NA          | NA | NA       |
| 2152 | NA | NA | NA       | NA | 1.87E+00 | NA | NA          | NA | NA       |
| 2153 | NA | NA | NA       | NA | 0.00E+00 | NA | NA          | NA | NA       |
| 2154 | NA | NA | 0.00E+00 | NA | NA       | NA | NA          | NA | NA       |
| 2155 | NA | NA | 0.00E+00 | NA | NA       | NA | NA          | NA | NA       |
| 2156 | NA | NA | NA       | NA | 9.57E-01 | NA | NA          | NA | NA       |
| 2157 | NA | NA | Inf      | NA | NA       | NA | NA          | NA | NA       |
| 2158 | NA | NA | NA       | NA | 3.09E-01 | NA | NA          | NA | NA       |
| 2159 | NA | NA | Inf      | NA | NA       | NA | NA          | NA | NA       |
| 2160 | NA | NA | NA       | NA | 1.59E+00 | NA | NA          | NA | NA       |
| 2161 | NA | NA | Inf      | NA | NA       | NA | NA          | NA | NA       |
| 2162 | NA | NA | NA       | NA | 1.63E+00 | NA | NA          | NA | NA       |

|      |    |    |          |    |          |    |              |    |            |
|------|----|----|----------|----|----------|----|--------------|----|------------|
| 2163 | NA | NA | 3.30E-01 | NA | 6.64E+00 | NA | (14.9,Inf]   | NA | (0.192,21] |
| 2164 | NA | NA | NA       | NA | 0.00E+00 | NA | NA           | NA | NA         |
| 2165 | NA | NA | 0.00E+00 | NA | NA       | NA | (14.9,Inf]   | NA | NA         |
| 2166 | NA | NA | NA       | NA | 7.75E-02 | NA | NA           | NA | NA         |
| 2167 | NA | NA | NA       | NA | 2.55E-01 | NA | NA           | NA | NA         |
| 2168 | NA | NA | NA       | NA | 4.75E-01 | NA | NA           | NA | NA         |
| 2169 | NA | NA | 0.00E+00 | NA | Inf      | NA | (14.9,Inf]   | NA | NA         |
| 2170 | NA | NA | NA       | NA | 4.82E-01 | NA | NA           | NA | NA         |
| 2171 | NA | NA | 0.00E+00 | NA | NA       | NA | NA           | NA | NA         |
| 2172 | NA | NA | Inf      | NA | NA       | NA | NA           | NA | NA         |
| 2173 | NA | NA | Inf      | NA | NA       | NA | NA           | NA | (21,Inf]   |
| 2174 | NA | NA | NA       | NA | 6.32E-02 | NA | NA           | NA | NA         |
| 2175 | NA | NA | 0.00E+00 | NA | 8.81E-01 | NA | (14.9,Inf]   | NA | NA         |
| 2176 | NA | NA | NA       | NA | 0.00E+00 | NA | NA           | NA | NA         |
| 2177 | NA | NA | Inf      | NA | NA       | NA | NA           | NA | (21,Inf]   |
| 2178 | NA | NA | NA       | NA | 1.93E-01 | NA | NA           | NA | NA         |
| 2179 | NA | NA | 0.00E+00 | NA | 5.15E+00 | NA | (1.34,14.9]  | NA | NA         |
| 2180 | NA | NA | 0.00E+00 | NA | NA       | NA | NA           | NA | NA         |
| 2181 | NA | NA | Inf      | NA | NA       | NA | NA           | NA | (21,Inf]   |
| 2182 | NA | NA | NA       | NA | 1.25E-01 | NA | NA           | NA | NA         |
| 2183 | NA | NA | Inf      | NA | NA       | NA | NA           | NA | NA         |
| 2184 | NA | NA | Inf      | NA | NA       | NA | NA           | NA | NA         |
| 2185 | NA | NA | 0.00E+00 | NA | 8.86E-01 | NA | (1.34,14.9]  | NA | NA         |
| 2186 | NA | NA | 0.00E+00 | NA | 0.00E+00 | NA | (0.101,1.34] | NA | NA         |
| 2187 | NA | NA | 0.00E+00 | NA | Inf      | NA | (14.9,Inf]   | NA | NA         |
| 2188 | NA | NA | NA       | NA | 4.27E-01 | NA | NA           | NA | NA         |
| 2189 | NA | NA | 0.00E+00 | NA | NA       | NA | NA           | NA | NA         |
| 2190 | NA | NA | Inf      | NA | NA       | NA | NA           | NA | NA         |
| 2191 | NA | NA | 0.00E+00 | NA | Inf      | NA | (14.9,Inf]   | NA | NA         |
| 2192 | NA | NA | 0.00E+00 | NA | Inf      | NA | (14.9,Inf]   | NA | NA         |
| 2193 | NA | NA | NA       | NA | 4.88E-01 | NA | NA           | NA | NA         |
| 2194 | NA | NA | NA       | NA | 0.00E+00 | NA | NA           | NA | NA         |
| 2195 | NA | NA | NA       | NA | 3.45E-01 | NA | NA           | NA | NA         |
| 2196 | NA | NA | NA       | NA | 2.20E+00 | NA | NA           | NA | NA         |
| 2197 | NA | NA | 0.00E+00 | NA | NA       | NA | NA           | NA | NA         |
| 2198 | NA | NA | 0.00E+00 | NA | NA       | NA | NA           | NA | NA         |
| 2199 | NA | NA | NA       | NA | 1.57E+00 | NA | NA           | NA | NA         |
| 2200 | NA | NA | NA       | NA | 5.96E-01 | NA | NA           | NA | NA         |

|      |    |    |          |    |          |    |              |    |            |
|------|----|----|----------|----|----------|----|--------------|----|------------|
| 2201 | NA | NA | 0.00E+00 | NA | 6.42E+00 | NA | (1.34,14.9]  | NA | NA         |
| 2202 | NA | NA | NA       | NA | 0.00E+00 | NA | NA           | NA | NA         |
| 2203 | NA | NA | 0.00E+00 | NA | NA       | NA | NA           | NA | NA         |
| 2204 | NA | NA | Inf      | NA | NA       | NA | NA           | NA | (21,Inf]   |
| 2205 | NA | NA | 4.16E-02 | NA | 1.59E+00 | NA | (14.9,Inf]   | NA | (0.192,21] |
| 2206 | NA | NA | 0.00E+00 | NA | NA       | NA | NA           | NA | NA         |
| 2207 | NA | NA | NA       | NA | 4.46E-01 | NA | NA           | NA | NA         |
| 2208 | NA | NA | Inf      | NA | NA       | NA | NA           | NA | NA         |
| 2209 | NA | NA | Inf      | NA | NA       | NA | NA           | NA | NA         |
| 2210 | NA | NA | NA       | NA | 2.26E+00 | NA | NA           | NA | NA         |
| 2211 | NA | NA | NA       | NA | 9.97E-01 | NA | NA           | NA | NA         |
| 2212 | NA | NA | 0.00E+00 | NA | 1.95E+00 | NA | (1.34,14.9]  | NA | NA         |
| 2213 | NA | NA | 0.00E+00 | NA | NA       | NA | NA           | NA | NA         |
| 2214 | NA | NA | 0.00E+00 | NA | NA       | NA | NA           | NA | NA         |
| 2215 | NA | NA | Inf      | NA | NA       | NA | NA           | NA | NA         |
| 2216 | NA | NA | Inf      | NA | NA       | NA | NA           | NA | NA         |
| 2217 | NA | NA | NA       | NA | 1.27E+00 | NA | NA           | NA | NA         |
| 2218 | NA | NA | Inf      | NA | 6.73E-01 | NA | NA           | NA | (0.192,21] |
| 2219 | NA | NA | Inf      | NA | NA       | NA | NA           | NA | NA         |
| 2220 | NA | NA | 0.00E+00 | NA | NA       | NA | (14.9,Inf]   | NA | NA         |
| 2221 | NA | NA | NA       | NA | 3.77E-01 | NA | NA           | NA | NA         |
| 2222 | NA | NA | Inf      | NA | NA       | NA | NA           | NA | (21,Inf]   |
| 2223 | NA | NA | 0.00E+00 | NA | NA       | NA | NA           | NA | NA         |
| 2224 | NA | NA | Inf      | NA | NA       | NA | NA           | NA | NA         |
| 2225 | NA | NA | NA       | NA | 0.00E+00 | NA | NA           | NA | NA         |
| 2226 | NA | NA | 0.00E+00 | NA | NA       | NA | NA           | NA | NA         |
| 2227 | NA | NA | NA       | NA | 1.26E+00 | NA | NA           | NA | NA         |
| 2228 | NA | NA | NA       | NA | 6.92E-02 | NA | NA           | NA | NA         |
| 2229 | NA | NA | 0.00E+00 | NA | 5.05E-02 | NA | (0.101,1.34] | NA | NA         |
| 2230 | NA | NA | 0.00E+00 | NA | NA       | NA | NA           | NA | NA         |
| 2231 | NA | NA | Inf      | NA | 9.79E-02 | NA | NA           | NA | (21,Inf]   |
| 2232 | NA | NA | 0.00E+00 | NA | NA       | NA | NA           | NA | NA         |
| 2233 | NA | NA | 0.00E+00 | NA | 6.95E-01 | NA | (1.34,14.9]  | NA | NA         |
| 2234 | NA | NA | NA       | NA | 5.96E-01 | NA | NA           | NA | NA         |
| 2235 | NA | NA | 4.03E-01 | NA | Inf      | NA | (14.9,Inf]   | NA | (0.192,21] |
| 2236 | NA | NA | NA       | NA | 1.61E+00 | NA | NA           | NA | NA         |
| 2237 | NA | NA | 0.00E+00 | NA | 3.31E+00 | NA | (14.9,Inf]   | NA | NA         |
| 2238 | NA | NA | NA       | NA | 5.85E-01 | NA | NA           | NA | NA         |

|      |    |    |          |    |          |    |              |    |            |
|------|----|----|----------|----|----------|----|--------------|----|------------|
| 2239 | NA | NA | NA       | NA | 0.00E+00 | NA | NA           | NA | NA         |
| 2240 | NA | NA | 0.00E+00 | NA | NA       | NA | NA           | NA | NA         |
| 2241 | NA | NA | 0.00E+00 | NA | 9.32E+00 | NA | (14.9,Inf]   | NA | NA         |
| 2242 | NA | NA | 0.00E+00 | NA | Inf      | NA | (14.9,Inf]   | NA | NA         |
| 2243 | NA | NA | 0.00E+00 | NA | 1.57E+01 | NA | (14.9,Inf]   | NA | NA         |
| 2244 | NA | NA | 0.00E+00 | NA | Inf      | NA | (14.9,Inf]   | NA | NA         |
| 2245 | NA | NA | NA       | NA | 9.01E-02 | NA | NA           | NA | NA         |
| 2246 | NA | NA | 0.00E+00 | NA | 6.89E-01 | NA | (1.34,14.9]  | NA | NA         |
| 2247 | NA | NA | Inf      | NA | 3.02E-01 | NA | NA           | NA | (21,Inf]   |
| 2248 | NA | NA | NA       | NA | 2.74E-01 | NA | NA           | NA | NA         |
| 2249 | NA | NA | NA       | NA | 0.00E+00 | NA | NA           | NA | NA         |
| 2250 | NA | NA | NA       | NA | 4.83E-02 | NA | NA           | NA | NA         |
| 2251 | NA | NA | 0.00E+00 | NA | NA       | NA | NA           | NA | NA         |
| 2252 | NA | NA | NA       | NA | 1.07E+00 | NA | NA           | NA | NA         |
| 2253 | NA | NA | NA       | NA | Inf      | NA | NA           | NA | NA         |
| 2254 | NA | NA | 0.00E+00 | NA | 8.33E+00 | NA | (14.9,Inf]   | NA | NA         |
| 2255 | NA | NA | NA       | NA | 0.00E+00 | NA | NA           | NA | NA         |
| 2256 | NA | NA | Inf      | NA | 3.24E-01 | NA | NA           | NA | (0.192,21] |
| 2257 | NA | NA | NA       | NA | 7.46E-02 | NA | NA           | NA | NA         |
| 2258 | NA | NA | NA       | NA | 0.00E+00 | NA | NA           | NA | NA         |
| 2259 | NA | NA | NA       | NA | 0.00E+00 | NA | NA           | NA | NA         |
| 2260 | NA | NA | NA       | NA | 0.00E+00 | NA | NA           | NA | NA         |
| 2261 | NA | NA | NA       | NA | Inf      | NA | NA           | NA | NA         |
| 2262 | NA | NA | Inf      | NA | NA       | NA | NA           | NA | NA         |
| 2263 | NA | NA | NA       | NA | 2.20E-01 | NA | NA           | NA | NA         |
| 2264 | NA | NA | NA       | NA | 0.00E+00 | NA | NA           | NA | NA         |
| 2265 | NA | NA | NA       | NA | 2.98E-01 | NA | NA           | NA | NA         |
| 2266 | NA | NA | Inf      | NA | NA       | NA | NA           | NA | (21,Inf]   |
| 2267 | NA | NA | Inf      | NA | NA       | NA | NA           | NA | (21,Inf]   |
| 2268 | NA | NA | NA       | NA | 0.00E+00 | NA | NA           | NA | NA         |
| 2269 | NA | NA | 0.00E+00 | NA | 0.00E+00 | NA | (0.101,1.34] | NA | NA         |
| 2270 | NA | NA | 0.00E+00 | NA | NA       | NA | NA           | NA | NA         |
| 2271 | NA | NA | Inf      | NA | NA       | NA | NA           | NA | NA         |
| 2272 | NA | NA | Inf      | NA | NA       | NA | NA           | NA | (21,Inf]   |
| 2273 | NA | NA | 0.00E+00 | NA | NA       | NA | NA           | NA | NA         |
| 2274 | NA | NA | NA       | NA | 2.64E+00 | NA | NA           | NA | NA         |
| 2275 | NA | NA | NA       | NA | 2.59E-01 | NA | NA           | NA | NA         |
| 2276 | NA | NA | Inf      | NA | NA       | NA | NA           | NA | NA         |

|      |    |    |          |    |          |    |             |    |            |
|------|----|----|----------|----|----------|----|-------------|----|------------|
| 2277 | NA | NA | NA       | NA | 1.16E-01 | NA | NA          | NA | NA         |
| 2278 | NA | NA | NA       | NA | 7.44E-01 | NA | NA          | NA | NA         |
| 2279 | NA | NA | NA       | NA | 0.00E+00 | NA | NA          | NA | NA         |
| 2280 | NA | NA | 2.27E+00 | NA | Inf      | NA | (14.9,Inf]  | NA | (0.192,21] |
| 2281 | NA | NA | NA       | NA | 4.06E+00 | NA | NA          | NA | NA         |
| 2282 | NA | NA | 0.00E+00 | NA | NA       | NA | NA          | NA | NA         |
| 2283 | NA | NA | Inf      | NA | NA       | NA | NA          | NA | (21,Inf]   |
| 2284 | NA | NA | NA       | NA | Inf      | NA | NA          | NA | NA         |
| 2285 | NA | NA | 1.60E+00 | NA | 0.00E+00 | NA | (1.34,14.9] | NA | (21,Inf]   |
| 2286 | NA | NA | 0.00E+00 | NA | 3.43E-01 | NA | (14.9,Inf]  | NA | NA         |
| 2287 | NA | NA | NA       | NA | 0.00E+00 | NA | NA          | NA | NA         |
| 2288 | NA | NA | Inf      | NA | NA       | NA | NA          | NA | NA         |
| 2289 | NA | NA | NA       | NA | 2.77E+00 | NA | NA          | NA | NA         |
| 2290 | NA | NA | NA       | NA | Inf      | NA | NA          | NA | NA         |
| 2291 | NA | NA | NA       | NA | 7.77E-01 | NA | NA          | NA | NA         |
| 2292 | NA | NA | Inf      | NA | NA       | NA | NA          | NA | NA         |
| 2293 | NA | NA | NA       | NA | 0.00E+00 | NA | NA          | NA | NA         |
| 2294 | NA | NA | 0.00E+00 | NA | NA       | NA | NA          | NA | NA         |
| 2295 | NA | NA | 0.00E+00 | NA | 7.16E-01 | NA | (14.9,Inf]  | NA | NA         |
| 2296 | NA | NA | Inf      | NA | NA       | NA | NA          | NA | (21,Inf]   |
| 2297 | NA | NA | NA       | NA | Inf      | NA | NA          | NA | NA         |
| 2298 | NA | NA | NA       | NA | 0.00E+00 | NA | NA          | NA | NA         |
| 2299 | NA | NA | NA       | NA | Inf      | NA | NA          | NA | NA         |
| 2300 | NA | NA | Inf      | NA | NA       | NA | NA          | NA | (21,Inf]   |
| 2301 | NA | NA | Inf      | NA | 0.00E+00 | NA | NA          | NA | (21,Inf]   |
| 2302 | NA | NA | 0.00E+00 | NA | Inf      | NA | (14.9,Inf]  | NA | NA         |
| 2303 | NA | NA | 2.78E-01 | NA | 0.00E+00 | NA | (14.9,Inf]  | NA | (21,Inf]   |
| 2304 | NA | NA | Inf      | NA | NA       | NA | NA          | NA | NA         |
| 2305 | NA | NA | 9.11E-01 | NA | 1.67E+00 | NA | (14.9,Inf]  | NA | (0.192,21] |
| 2306 | NA | NA | 0.00E+00 | NA | Inf      | NA | (14.9,Inf]  | NA | NA         |
| 2307 | NA | NA | 0.00E+00 | NA | Inf      | NA | (14.9,Inf]  | NA | NA         |
| 2308 | NA | NA | NA       | NA | 0.00E+00 | NA | NA          | NA | NA         |
| 2309 | NA | NA | NA       | NA | 0.00E+00 | NA | NA          | NA | NA         |
| 2310 | NA | NA | NA       | NA | 0.00E+00 | NA | NA          | NA | NA         |
| 2311 | NA | NA | NA       | NA | 6.44E-01 | NA | NA          | NA | NA         |
| 2312 | NA | NA | Inf      | NA | NA       | NA | NA          | NA | NA         |
| 2313 | NA | NA | NA       | NA | 0.00E+00 | NA | NA          | NA | NA         |
| 2314 | NA | NA | NA       | NA | 0.00E+00 | NA | NA          | NA | NA         |

|      |    |    |          |    |          |    |             |    |            |
|------|----|----|----------|----|----------|----|-------------|----|------------|
| 2315 | NA | NA | NA       | NA | 0.00E+00 | NA | NA          | NA | NA         |
| 2316 | NA | NA | NA       | NA | 1.64E-01 | NA | NA          | NA | NA         |
| 2317 | NA | NA | Inf      | NA | NA       | NA | NA          | NA | NA         |
| 2318 | NA | NA | 0.00E+00 | NA | 1.02E+00 | NA | (14.9,Inf]  | NA | NA         |
| 2319 | NA | NA | 0.00E+00 | NA | 4.57E-01 | NA | (14.9,Inf]  | NA | NA         |
| 2320 | NA | NA | NA       | NA | 2.11E-01 | NA | NA          | NA | NA         |
| 2321 | NA | NA | NA       | NA | 0.00E+00 | NA | NA          | NA | NA         |
| 2322 | NA | NA | Inf      | NA | NA       | NA | NA          | NA | NA         |
| 2323 | NA | NA | NA       | NA | 6.75E-01 | NA | NA          | NA | NA         |
| 2324 | NA | NA | Inf      | NA | 0.00E+00 | NA | NA          | NA | (21,Inf]   |
| 2325 | NA | NA | 2.89E-02 | NA | 0.00E+00 | NA | (14.9,Inf]  | NA | (21,Inf]   |
| 2326 | NA | NA | NA       | NA | 8.63E-01 | NA | NA          | NA | NA         |
| 2327 | NA | NA | NA       | NA | 9.28E-01 | NA | NA          | NA | NA         |
| 2328 | NA | NA | NA       | NA | 9.17E-01 | NA | NA          | NA | NA         |
| 2329 | NA | NA | 0.00E+00 | NA | NA       | NA | NA          | NA | NA         |
| 2330 | NA | NA | 0.00E+00 | NA | Inf      | NA | (14.9,Inf]  | NA | NA         |
| 2331 | NA | NA | NA       | NA | 9.40E+00 | NA | NA          | NA | NA         |
| 2332 | NA | NA | 0.00E+00 | NA | Inf      | NA | (14.9,Inf]  | NA | NA         |
| 2333 | NA | NA | NA       | NA | 0.00E+00 | NA | NA          | NA | NA         |
| 2334 | NA | NA | NA       | NA | 2.43E+00 | NA | NA          | NA | NA         |
| 2335 | NA | NA | 0.00E+00 | NA | NA       | NA | NA          | NA | NA         |
| 2336 | NA | NA | 0.00E+00 | NA | Inf      | NA | (14.9,Inf]  | NA | NA         |
| 2337 | NA | NA | NA       | NA | 0.00E+00 | NA | NA          | NA | NA         |
| 2338 | NA | NA | NA       | NA | 1.03E+01 | NA | NA          | NA | NA         |
| 2339 | NA | NA | Inf      | NA | NA       | NA | NA          | NA | NA         |
| 2340 | NA | NA | Inf      | NA | 3.70E-01 | NA | NA          | NA | (0.192,21] |
| 2341 | NA | NA | Inf      | NA | 3.21E-01 | NA | NA          | NA | (21,Inf]   |
| 2342 | NA | NA | 0.00E+00 | NA | NA       | NA | (14.9,Inf]  | NA | NA         |
| 2343 | NA | NA | NA       | NA | 0.00E+00 | NA | NA          | NA | NA         |
| 2344 | NA | NA | NA       | NA | 0.00E+00 | NA | NA          | NA | NA         |
| 2345 | NA | NA | Inf      | NA | NA       | NA | NA          | NA | NA         |
| 2346 | NA | NA | 0.00E+00 | NA | 8.16E-01 | NA | (1.34,14.9] | NA | NA         |
| 2347 | NA | NA | NA       | NA | 5.24E-01 | NA | NA          | NA | NA         |
| 2348 | NA | NA | NA       | NA | 0.00E+00 | NA | NA          | NA | NA         |
| 2349 | NA | NA | Inf      | NA | 1.55E-01 | NA | NA          | NA | (21,Inf]   |
| 2350 | NA | NA | NA       | NA | 1.88E-01 | NA | NA          | NA | NA         |
| 2351 | NA | NA | NA       | NA | 1.38E+00 | NA | NA          | NA | NA         |
| 2352 | NA | NA | Inf      | NA | NA       | NA | NA          | NA | NA         |

|      |    |    |          |    |          |    |              |    |            |
|------|----|----|----------|----|----------|----|--------------|----|------------|
| 2353 | NA | NA | NA       | NA | 0.00E+00 | NA | NA           | NA | NA         |
| 2354 | NA | NA | Inf      | NA | NA       | NA | NA           | NA | NA         |
| 2355 | NA | NA | NA       | NA | 4.04E+00 | NA | NA           | NA | NA         |
| 2356 | NA | NA | NA       | NA | 4.19E-01 | NA | NA           | NA | NA         |
| 2357 | NA | NA | NA       | NA | 0.00E+00 | NA | NA           | NA | NA         |
| 2358 | NA | NA | NA       | NA | 1.88E-01 | NA | NA           | NA | NA         |
| 2359 | NA | NA | 0.00E+00 | NA | 0.00E+00 | NA | (14.9,Inf]   | NA | NA         |
| 2360 | NA | NA | NA       | NA | Inf      | NA | NA           | NA | NA         |
| 2361 | NA | NA | NA       | NA | 5.96E-01 | NA | NA           | NA | NA         |
| 2362 | NA | NA | Inf      | NA | 4.97E-01 | NA | NA           | NA | (0.192,21] |
| 2363 | NA | NA | NA       | NA | 2.48E-01 | NA | NA           | NA | NA         |
| 2364 | NA | NA | 1.79E-01 | NA | 8.19E-01 | NA | (14.9,Inf]   | NA | (0.192,21] |
| 2365 | NA | NA | NA       | NA | 0.00E+00 | NA | NA           | NA | NA         |
| 2366 | NA | NA | NA       | NA | 9.41E+00 | NA | NA           | NA | NA         |
| 2367 | NA | NA | NA       | NA | 0.00E+00 | NA | NA           | NA | NA         |
| 2368 | NA | NA | 0.00E+00 | NA | 0.00E+00 | NA | (1.34,14.9]  | NA | NA         |
| 2369 | NA | NA | NA       | NA | 3.16E-01 | NA | NA           | NA | NA         |
| 2370 | NA | NA | 0.00E+00 | NA | Inf      | NA | (14.9,Inf]   | NA | NA         |
| 2371 | NA | NA | 0.00E+00 | NA | 1.69E-01 | NA | (0.101,1.34] | NA | NA         |
| 2372 | NA | NA | NA       | NA | 0.00E+00 | NA | NA           | NA | NA         |
| 2373 | NA | NA | Inf      | NA | NA       | NA | NA           | NA | NA         |
| 2374 | NA | NA | 0.00E+00 | NA | NA       | NA | NA           | NA | NA         |
| 2375 | NA | NA | 0.00E+00 | NA | 6.26E-01 | NA | (1.34,14.9]  | NA | NA         |
| 2376 | NA | NA | Inf      | NA | NA       | NA | NA           | NA | NA         |
| 2377 | NA | NA | NA       | NA | 0.00E+00 | NA | NA           | NA | NA         |
| 2378 | NA | NA | NA       | NA | 4.08E-01 | NA | NA           | NA | NA         |
| 2379 | NA | NA | Inf      | NA | NA       | NA | NA           | NA | NA         |
| 2380 | NA | NA | NA       | NA | 6.08E-01 | NA | NA           | NA | NA         |
| 2381 | NA | NA | NA       | NA | 0.00E+00 | NA | NA           | NA | NA         |
| 2382 | NA | NA | 0.00E+00 | NA | 0.00E+00 | NA | (1.34,14.9]  | NA | NA         |
| 2383 | NA | NA | 4.35E-01 | NA | 1.87E+00 | NA | (14.9,Inf]   | NA | (0.192,21] |
| 2384 | NA | NA | Inf      | NA | 0.00E+00 | NA | NA           | NA | (21,Inf]   |
| 2385 | NA | NA | 0.00E+00 | NA | NA       | NA | NA           | NA | NA         |
| 2386 | NA | NA | 0.00E+00 | NA | NA       | NA | NA           | NA | NA         |
| 2387 | NA | NA | Inf      | NA | NA       | NA | NA           | NA | (21,Inf]   |
| 2388 | NA | NA | Inf      | NA | NA       | NA | NA           | NA | (21,Inf]   |
| 2389 | NA | NA | NA       | NA | 0.00E+00 | NA | NA           | NA | NA         |
| 2390 | NA | NA | 0.00E+00 | NA | NA       | NA | NA           | NA | NA         |

|      |    |    |          |    |          |    |              |    |            |
|------|----|----|----------|----|----------|----|--------------|----|------------|
| 2391 | NA | NA | 0.00E+00 | NA | Inf      | NA | (14.9,Inf]   | NA | NA         |
| 2392 | NA | NA | NA       | NA | 4.45E-01 | NA | NA           | NA | NA         |
| 2393 | NA | NA | NA       | NA | 0.00E+00 | NA | NA           | NA | NA         |
| 2394 | NA | NA | NA       | NA | 0.00E+00 | NA | NA           | NA | NA         |
| 2395 | NA | NA | NA       | NA | 1.04E-01 | NA | NA           | NA | NA         |
| 2396 | NA | NA | 0.00E+00 | NA | NA       | NA | NA           | NA | NA         |
| 2397 | NA | NA | 0.00E+00 | NA | 0.00E+00 | NA | (1.34,14.9]  | NA | NA         |
| 2398 | NA | NA | NA       | NA | Inf      | NA | NA           | NA | NA         |
| 2399 | NA | NA | Inf      | NA | NA       | NA | NA           | NA | NA         |
| 2400 | NA | NA | NA       | NA | 0.00E+00 | NA | NA           | NA | NA         |
| 2401 | NA | NA | NA       | NA | 0.00E+00 | NA | NA           | NA | NA         |
| 2402 | NA | NA | NA       | NA | 0.00E+00 | NA | NA           | NA | NA         |
| 2403 | NA | NA | NA       | NA | 0.00E+00 | NA | NA           | NA | NA         |
| 2404 | NA | NA | NA       | NA | 0.00E+00 | NA | NA           | NA | NA         |
| 2405 | NA | NA | 4.46E+01 | NA | Inf      | NA | (14.9,Inf]   | NA | (21,Inf]   |
| 2406 | NA | NA | 2.29E-01 | NA | Inf      | NA | (14.9,Inf]   | NA | (0.192,21] |
| 2407 | NA | NA | NA       | NA | Inf      | NA | NA           | NA | NA         |
| 2408 | NA | NA | Inf      | NA | NA       | NA | NA           | NA | NA         |
| 2409 | NA | NA | 0.00E+00 | NA | 0.00E+00 | NA | (0.101,1.34] | NA | NA         |
| 2410 | NA | NA | Inf      | NA | NA       | NA | NA           | NA | NA         |
| 2411 | NA | NA | 0.00E+00 | NA | 0.00E+00 | NA | (1.34,14.9]  | NA | NA         |
| 2412 | NA | NA | 0.00E+00 | NA | NA       | NA | NA           | NA | NA         |
| 2413 | NA | NA | NA       | NA | Inf      | NA | NA           | NA | NA         |
| 2414 | NA | NA | 3.77E-01 | NA | 9.73E-02 | NA | (1.34,14.9]  | NA | (21,Inf]   |
| 2415 | NA | NA | Inf      | NA | NA       | NA | NA           | NA | NA         |
| 2416 | NA | NA | NA       | NA | 0.00E+00 | NA | NA           | NA | NA         |
| 2417 | NA | NA | NA       | NA | 8.66E+00 | NA | NA           | NA | NA         |
| 2418 | NA | NA | 1.11E+00 | NA | 1.08E+00 | NA | (1.34,14.9]  | NA | (0.192,21] |
| 2419 | NA | NA | NA       | NA | Inf      | NA | NA           | NA | NA         |
| 2420 | NA | NA | NA       | NA | 0.00E+00 | NA | NA           | NA | NA         |
| 2421 | NA | NA | Inf      | NA | NA       | NA | NA           | NA | NA         |
| 2422 | NA | NA | Inf      | NA | 4.07E-01 | NA | NA           | NA | (21,Inf]   |
| 2423 | NA | NA | NA       | NA | 0.00E+00 | NA | NA           | NA | NA         |
| 2424 | NA | NA | 0.00E+00 | NA | 4.87E+00 | NA | (14.9,Inf]   | NA | NA         |
| 2425 | NA | NA | 0.00E+00 | NA | Inf      | NA | (14.9,Inf]   | NA | NA         |
| 2426 | NA | NA | NA       | NA | 4.79E-01 | NA | NA           | NA | NA         |
| 2427 | NA | NA | NA       | NA | 0.00E+00 | NA | NA           | NA | NA         |
| 2428 | NA | NA | NA       | NA | 0.00E+00 | NA | NA           | NA | NA         |



|      |    |    |          |    |          |    |             |    |            |
|------|----|----|----------|----|----------|----|-------------|----|------------|
| 2429 | NA | NA | NA       | NA | 0.00E+00 | NA | NA          | NA | NA         |
| 2430 | NA | NA | NA       | NA | 0.00E+00 | NA | NA          | NA | NA         |
| 2431 | NA | NA | NA       | NA | 0.00E+00 | NA | NA          | NA | NA         |
| 2432 | NA | NA | Inf      | NA | NA       | NA | NA          | NA | (21,Inf]   |
| 2433 | NA | NA | NA       | NA | 0.00E+00 | NA | NA          | NA | NA         |
| 2434 | NA | NA | 0.00E+00 | NA | NA       | NA | NA          | NA | NA         |
| 2435 | NA | NA | NA       | NA | Inf      | NA | NA          | NA | NA         |
| 2436 | NA | NA | NA       | NA | 0.00E+00 | NA | NA          | NA | NA         |
| 2437 | NA | NA | NA       | NA | 0.00E+00 | NA | NA          | NA | NA         |
| 2438 | NA | NA | NA       | NA | 0.00E+00 | NA | NA          | NA | NA         |
| 2439 | NA | NA | NA       | NA | 0.00E+00 | NA | NA          | NA | NA         |
| 2440 | NA | NA | 2.83E+00 | NA | 0.00E+00 | NA | (1.34,14.9] | NA | (21,Inf]   |
| 2441 | NA | NA | 0.00E+00 | NA | 1.53E-01 | NA | (1.34,14.9] | NA | NA         |
| 2442 | NA | NA | NA       | NA | 2.73E+00 | NA | NA          | NA | NA         |
| 2443 | NA | NA | NA       | NA | 0.00E+00 | NA | NA          | NA | NA         |
| 2444 | NA | NA | 0.00E+00 | NA | 2.45E+00 | NA | (14.9,Inf]  | NA | NA         |
| 2445 | NA | NA | NA       | NA | 1.46E+00 | NA | NA          | NA | NA         |
| 2446 | NA | NA | 0.00E+00 | NA | Inf      | NA | (14.9,Inf]  | NA | NA         |
| 2447 | NA | NA | NA       | NA | 0.00E+00 | NA | NA          | NA | NA         |
| 2448 | NA | NA | 1.25E-01 | NA | Inf      | NA | (14.9,Inf]  | NA | (0.192,21] |
| 2449 | NA | NA | NA       | NA | 0.00E+00 | NA | NA          | NA | NA         |
| 2450 | NA | NA | NA       | NA | Inf      | NA | NA          | NA | NA         |
| 2451 | NA | NA | Inf      | NA | NA       | NA | NA          | NA | NA         |
| 2452 | NA | NA | 0.00E+00 | NA | Inf      | NA | (14.9,Inf]  | NA | NA         |
| 2453 | NA | NA | 0.00E+00 | NA | Inf      | NA | (14.9,Inf]  | NA | NA         |
| 2454 | NA | NA | NA       | NA | 0.00E+00 | NA | NA          | NA | NA         |
| 2455 | NA | NA | NA       | NA | 0.00E+00 | NA | NA          | NA | NA         |
| 2456 | NA | NA | NA       | NA | Inf      | NA | NA          | NA | NA         |
| 2457 | NA | NA | 0.00E+00 | NA | 3.40E-01 | NA | (1.34,14.9] | NA | NA         |
| 2458 | NA | NA | NA       | NA | 0.00E+00 | NA | NA          | NA | NA         |
| 2459 | NA | NA | NA       | NA | 0.00E+00 | NA | NA          | NA | NA         |
| 2460 | NA | NA | NA       | NA | 0.00E+00 | NA | NA          | NA | NA         |
| 2461 | NA | NA | NA       | NA | 0.00E+00 | NA | NA          | NA | NA         |
| 2462 | NA | NA | 1.61E+01 | NA | 0.00E+00 | NA | (1.34,14.9] | NA | (21,Inf]   |
| 2463 | NA | NA | 0.00E+00 | NA | 0.00E+00 | NA | (1.34,14.9] | NA | NA         |
| 2464 | NA | NA | Inf      | NA | NA       | NA | NA          | NA | NA         |
| 2465 | NA | NA | Inf      | NA | Inf      | NA | NA          | NA | (0.192,21] |
| 2466 | NA | NA | NA       | NA | 0.00E+00 | NA | NA          | NA | NA         |

|      |    |    |          |    |          |    |             |    |          |
|------|----|----|----------|----|----------|----|-------------|----|----------|
| 2467 | NA | NA | Inf      | NA | NA       | NA | NA          | NA | NA       |
| 2468 | NA | NA | Inf      | NA | NA       | NA | NA          | NA | NA       |
| 2469 | NA | NA | NA       | NA | 0.00E+00 | NA | NA          | NA | NA       |
| 2470 | NA | NA | Inf      | NA | 3.45E+00 | NA | NA          | NA | (21,Inf] |
| 2471 | NA | NA | NA       | NA | 0.00E+00 | NA | NA          | NA | NA       |
| 2472 | NA | NA | NA       | NA | 0.00E+00 | NA | NA          | NA | NA       |
| 2473 | NA | NA | NA       | NA | 4.70E+00 | NA | NA          | NA | NA       |
| 2474 | NA | NA | Inf      | NA | NA       | NA | NA          | NA | NA       |
| 2475 | NA | NA | 0.00E+00 | NA | NA       | NA | NA          | NA | NA       |
| 2476 | NA | NA | NA       | NA | 0.00E+00 | NA | NA          | NA | NA       |
| 2477 | NA | NA | NA       | NA | 0.00E+00 | NA | NA          | NA | NA       |
| 2478 | NA | NA | NA       | NA | 0.00E+00 | NA | NA          | NA | NA       |
| 2479 | NA | NA | 3.41E+00 | NA | 0.00E+00 | NA | (1.34,14.9] | NA | (21,Inf] |
| 2480 | NA | NA | NA       | NA | Inf      | NA | NA          | NA | NA       |
| 2481 | NA | NA | 0.00E+00 | NA | NA       | NA | NA          | NA | NA       |
| 2482 | NA | NA | NA       | NA | 5.01E-01 | NA | NA          | NA | NA       |
| 2483 | NA | NA | NA       | NA | 0.00E+00 | NA | NA          | NA | NA       |
| 2484 | NA | NA | NA       | NA | Inf      | NA | NA          | NA | NA       |
| 2485 | NA | NA | 0.00E+00 | NA | Inf      | NA | (14.9,Inf]  | NA | NA       |
| 2486 | NA | NA | NA       | NA | 1.65E+00 | NA | NA          | NA | NA       |
| 2487 | NA | NA | NA       | NA | Inf      | NA | NA          | NA | NA       |
| 2488 | NA | NA | NA       | NA | 0.00E+00 | NA | NA          | NA | NA       |
| 2489 | NA | NA | NA       | NA | 0.00E+00 | NA | NA          | NA | NA       |
| 2490 | NA | NA | 0.00E+00 | NA | NA       | NA | NA          | NA | NA       |
| 2491 | NA | NA | NA       | NA | 3.62E-01 | NA | NA          | NA | NA       |
| 2492 | NA | NA | NA       | NA | 0.00E+00 | NA | NA          | NA | NA       |
| 2493 | NA | NA | Inf      | NA | NA       | NA | NA          | NA | NA       |
| 2494 | NA | NA | NA       | NA | Inf      | NA | NA          | NA | NA       |
| 2495 | NA | NA | NA       | NA | 0.00E+00 | NA | NA          | NA | NA       |
| 2496 | NA | NA | Inf      | NA | NA       | NA | NA          | NA | NA       |
| 2497 | NA | NA | NA       | NA | Inf      | NA | NA          | NA | NA       |
| 2498 | NA | NA | 2.37E+01 | NA | Inf      | NA | (14.9,Inf]  | NA | (21,Inf] |
| 2499 | NA | NA | NA       | NA | 0.00E+00 | NA | NA          | NA | NA       |
| 2500 | NA | NA | Inf      | NA | 0.00E+00 | NA | NA          | NA | (21,Inf] |
| 2501 | NA | NA | 0.00E+00 | NA | NA       | NA | NA          | NA | NA       |
| 2502 | NA | NA | 0.00E+00 | NA | Inf      | NA | (14.9,Inf]  | NA | NA       |
| 2503 | NA | NA | 0.00E+00 | NA | 4.59E-01 | NA | (14.9,Inf]  | NA | NA       |
| 2504 | NA | NA | NA       | NA | 0.00E+00 | NA | NA          | NA | NA       |

|      |     |    |          |    |          |    |             |    |            |
|------|-----|----|----------|----|----------|----|-------------|----|------------|
| 2505 | NA  | NA | 0.00E+00 | NA | Inf      | NA | (14.9,Inf]  | NA | NA         |
| 2506 | NA  | NA | NA       | NA | 2.21E-01 | NA | NA          | NA | NA         |
| 2507 | NA  | NA | 2.05E+00 | NA | 2.50E+00 | NA | (1.34,14.9] | NA | (0.192,21] |
| 2508 | NA  | NA | NA       | NA | 2.59E-01 | NA | NA          | NA | NA         |
| 2509 | NA  | NA | 0.00E+00 | NA | Inf      | NA | (14.9,Inf]  | NA | NA         |
| 2510 | NA  | NA | NA       | NA | 0.00E+00 | NA | NA          | NA | NA         |
| 2511 | NA  | NA | 0.00E+00 | NA | 0.00E+00 | NA | (1.34,14.9] | NA | NA         |
| 2512 | NA  | NA | NA       | NA | 0.00E+00 | NA | NA          | NA | NA         |
| 2513 | NA  | NA | NA       | NA | 0.00E+00 | NA | NA          | NA | NA         |
| 2514 | NA  | NA | 0.00E+00 | NA | NA       | NA | NA          | NA | NA         |
| 2515 | NA  | NA | NA       | NA | 0.00E+00 | NA | NA          | NA | NA         |
| 2516 | NA  | NA | 0.00E+00 | NA | 5.78E-01 | NA | (14.9,Inf]  | NA | NA         |
| 2517 | NA  | NA | Inf      | NA | NA       | NA | NA          | NA | NA         |
| 2518 | NA  | NA | Inf      | NA | NA       | NA | NA          | NA | (21,Inf]   |
| 2519 | NA  | NA | NA       | NA | 0.00E+00 | NA | NA          | NA | NA         |
| 2520 | NA  | NA | Inf      | NA | Inf      | NA | NA          | NA | (0.192,21] |
| 2521 | NA  | NA | NA       | NA | 0.00E+00 | NA | NA          | NA | NA         |
| 2522 | NA  | NA | NA       | NA | 0.00E+00 | NA | NA          | NA | NA         |
| 2523 | NA  | NA | 0.00E+00 | NA | Inf      | NA | (14.9,Inf]  | NA | NA         |
| 2524 | NA  | NA | NA       | NA | 0.00E+00 | NA | NA          | NA | NA         |
| 2525 | NA  | NA | NA       | NA | 0.00E+00 | NA | NA          | NA | NA         |
| 2526 | NA  | NA | NA       | NA | 3.38E-01 | NA | NA          | NA | NA         |
| 2527 | NA  | NA | 0.00E+00 | NA | 2.62E-01 | NA | (1.34,14.9] | NA | NA         |
| 2528 | NA  | NA | NA       | NA | 0.00E+00 | NA | NA          | NA | NA         |
| 2529 | NA  | NA | NA       | NA | 0.00E+00 | NA | NA          | NA | NA         |
| 2530 | NA  | NA | NA       | NA | Inf      | NA | NA          | NA | NA         |
| 2531 | NA  | NA | NA       | NA | 0.00E+00 | NA | NA          | NA | NA         |
| 2532 | NA  | NA | NA       | NA | 0.00E+00 | NA | NA          | NA | NA         |
| 2533 | NA  | NA | NA       | NA | 0.00E+00 | NA | NA          | NA | NA         |
| 2534 | NA  | NA | 0.00E+00 | NA | NA       | NA | NA          | NA | NA         |
| 2535 | NA  | NA | NA       | NA | 0.00E+00 | NA | NA          | NA | NA         |
| 2536 | NA  | NA | Inf      | NA | 1.04E+00 | NA | NA          | NA | (0.192,21] |
| 2537 | NA  | NA | Inf      | NA | 0.00E+00 | NA | NA          | NA | (21,Inf]   |
| 2538 | NA  | NA | NA       | NA | 0.00E+00 | NA | NA          | NA | NA         |
| 2539 | NA  | NA | NA       | NA | 0.00E+00 | NA | NA          | NA | NA         |
| 2540 | Inf | NA | NA       | NA | 0.00E+00 | NA | NA          | NA | NA         |
| 2541 | NA  | NA | NA       | NA | 0.00E+00 | NA | NA          | NA | NA         |
| 2542 | NA  | NA | NA       | NA | 0.00E+00 | NA | NA          | NA | NA         |

|      |    |    |          |    |          |    |              |    |          |
|------|----|----|----------|----|----------|----|--------------|----|----------|
| 2543 | NA | NA | NA       | NA | 0.00E+00 | NA | NA           | NA | NA       |
| 2544 | NA | NA | 0.00E+00 | NA | Inf      | NA | (14.9,Inf]   | NA | NA       |
| 2545 | NA | NA | NA       | NA | 0.00E+00 | NA | NA           | NA | NA       |
| 2546 | NA | NA | NA       | NA | 0.00E+00 | NA | NA           | NA | NA       |
| 2547 | NA | NA | NA       | NA | 3.20E+00 | NA | NA           | NA | NA       |
| 2548 | NA | NA | NA       | NA | 0.00E+00 | NA | NA           | NA | NA       |
| 2549 | NA | NA | NA       | NA | 0.00E+00 | NA | NA           | NA | NA       |
| 2550 | NA | NA | NA       | NA | Inf      | NA | NA           | NA | NA       |
| 2551 | NA | NA | NA       | NA | 1.39E+00 | NA | NA           | NA | NA       |
| 2552 | NA | NA | NA       | NA | Inf      | NA | NA           | NA | NA       |
| 2553 | NA | NA | Inf      | NA | 0.00E+00 | NA | NA           | NA | (21,Inf] |
| 2554 | NA | NA | NA       | NA | 0.00E+00 | NA | NA           | NA | NA       |
| 2555 | NA | NA | 0.00E+00 | NA | 0.00E+00 | NA | (14.9,Inf]   | NA | NA       |
| 2556 | NA | NA | NA       | NA | Inf      | NA | NA           | NA | NA       |
| 2557 | NA | NA | 0.00E+00 | NA | 0.00E+00 | NA | (14.9,Inf]   | NA | NA       |
| 2558 | NA | NA | NA       | NA | Inf      | NA | NA           | NA | NA       |
| 2559 | NA | NA | NA       | NA | Inf      | NA | NA           | NA | NA       |
| 2560 | NA | NA | NA       | NA | Inf      | NA | NA           | NA | NA       |
| 2561 | NA | NA | 0.00E+00 | NA | Inf      | NA | (14.9,Inf]   | NA | NA       |
| 2562 | NA | NA | 0.00E+00 | NA | 0.00E+00 | NA | (0.101,1.34] | NA | NA       |
| 2563 | NA | NA | NA       | NA | 0.00E+00 | NA | NA           | NA | NA       |
| 2564 | NA | NA | NA       | NA | Inf      | NA | NA           | NA | NA       |
| 2565 | NA | NA | NA       | NA | Inf      | NA | NA           | NA | NA       |
| 2566 | NA | NA | NA       | NA | Inf      | NA | NA           | NA | NA       |
| 2567 | NA | NA | NA       | NA | 0.00E+00 | NA | NA           | NA | NA       |
| 2568 | NA | NA | NA       | NA | 0.00E+00 | NA | NA           | NA | NA       |
| 2569 | NA | NA | 0.00E+00 | NA | 0.00E+00 | NA | (1.34,14.9]  | NA | NA       |
| 2570 | NA | NA | NA       | NA | Inf      | NA | NA           | NA | NA       |
| 2571 | NA | NA | 6.99E+00 | NA | Inf      | NA | (14.9,Inf]   | NA | (21,Inf] |
| 2572 | NA | NA | NA       | NA | 5.34E-01 | NA | NA           | NA | NA       |
| 2573 | NA | NA | 0.00E+00 | NA | Inf      | NA | (14.9,Inf]   | NA | NA       |
| 2574 | NA | NA | 0.00E+00 | NA | Inf      | NA | (14.9,Inf]   | NA | NA       |
| 2575 | NA | NA | NA       | NA | 0.00E+00 | NA | NA           | NA | NA       |
| 2576 | NA | NA | NA       | NA | 0.00E+00 | NA | NA           | NA | NA       |
| 2577 | NA | NA | NA       | NA | Inf      | NA | NA           | NA | NA       |
| 2578 | NA | NA | 0.00E+00 | NA | Inf      | NA | (14.9,Inf]   | NA | NA       |
| 2579 | NA | NA | NA       | NA | Inf      | NA | NA           | NA | NA       |
| 2580 | NA | NA | NA       | NA | 0.00E+00 | NA | NA           | NA | NA       |

|      |    |    |          |    |          |    |             |    |          |
|------|----|----|----------|----|----------|----|-------------|----|----------|
| 2581 | NA | NA | NA       | NA | 8.06E-01 | NA | NA          | NA | NA       |
| 2582 | NA | NA | NA       | NA | 0.00E+00 | NA | NA          | NA | NA       |
| 2583 | NA | NA | NA       | NA | Inf      | NA | NA          | NA | NA       |
| 2584 | NA | NA | NA       | NA | Inf      | NA | NA          | NA | NA       |
| 2585 | NA | NA | NA       | NA | 0.00E+00 | NA | NA          | NA | NA       |
| 2586 | NA | NA | NA       | NA | Inf      | NA | NA          | NA | NA       |
| 2587 | NA | NA | NA       | NA | 0.00E+00 | NA | NA          | NA | NA       |
| 2588 | NA | NA | NA       | NA | Inf      | NA | NA          | NA | NA       |
| 2589 | NA | NA | 0.00E+00 | NA | 2.99E-01 | NA | (1.34,14.9] | NA | NA       |
| 2590 | NA | NA | NA       | NA | 1.79E+00 | NA | NA          | NA | NA       |
| 2591 | NA | NA | NA       | NA | Inf      | NA | NA          | NA | NA       |
| 2592 | NA | NA | NA       | NA | 0.00E+00 | NA | NA          | NA | NA       |
| 2593 | NA | NA | Inf      | NA | NA       | NA | NA          | NA | NA       |
| 2594 | NA | NA | NA       | NA | 0.00E+00 | NA | NA          | NA | NA       |
| 2595 | NA | NA | Inf      | NA | NA       | NA | NA          | NA | NA       |
| 2596 | NA | NA | NA       | NA | 0.00E+00 | NA | NA          | NA | NA       |
| 2597 | NA | NA | NA       | NA | 0.00E+00 | NA | NA          | NA | NA       |
| 2598 | NA | NA | NA       | NA | Inf      | NA | NA          | NA | NA       |
| 2599 | NA | NA | NA       | NA | 0.00E+00 | NA | NA          | NA | NA       |
| 2600 | NA | NA | NA       | NA | 0.00E+00 | NA | NA          | NA | NA       |
| 2601 | NA | NA | 0.00E+00 | NA | Inf      | NA | (14.9,Inf]  | NA | NA       |
| 2602 | NA | NA | NA       | NA | 9.02E-01 | NA | NA          | NA | NA       |
| 2603 | NA | NA | NA       | NA | 0.00E+00 | NA | NA          | NA | NA       |
| 2604 | NA | NA | NA       | NA | Inf      | NA | NA          | NA | NA       |
| 2605 | NA | NA | NA       | NA | 0.00E+00 | NA | NA          | NA | NA       |
| 2606 | NA | NA | 0.00E+00 | NA | Inf      | NA | (14.9,Inf]  | NA | NA       |
| 2607 | NA | NA | NA       | NA | 0.00E+00 | NA | NA          | NA | NA       |
| 2608 | NA | NA | NA       | NA | 0.00E+00 | NA | NA          | NA | NA       |
| 2609 | NA | NA | NA       | NA | Inf      | NA | NA          | NA | NA       |
| 2610 | NA | NA | NA       | NA | 0.00E+00 | NA | NA          | NA | NA       |
| 2611 | NA | NA | 0.00E+00 | NA | 0.00E+00 | NA | (1.34,14.9] | NA | NA       |
| 2612 | NA | NA | NA       | NA | Inf      | NA | NA          | NA | NA       |
| 2613 | NA | NA | NA       | NA | 1.36E+00 | NA | NA          | NA | NA       |
| 2614 | NA | NA | 0.00E+00 | NA | Inf      | NA | (14.9,Inf]  | NA | NA       |
| 2615 | NA | NA | NA       | NA | Inf      | NA | NA          | NA | NA       |
| 2616 | NA | NA | NA       | NA | Inf      | NA | NA          | NA | NA       |
| 2617 | NA | NA | NA       | NA | Inf      | NA | NA          | NA | NA       |
| 2618 | NA | NA | Inf      | NA | 0.00E+00 | NA | NA          | NA | (21,Inf] |

|      |    |    |          |    |          |    |            |    |          |
|------|----|----|----------|----|----------|----|------------|----|----------|
| 2619 | NA | NA | NA       | NA | 0.00E+00 | NA | NA         | NA | NA       |
| 2620 | NA | NA | NA       | NA | Inf      | NA | NA         | NA | NA       |
| 2621 | NA | NA | NA       | NA | Inf      | NA | NA         | NA | NA       |
| 2622 | NA | NA | 0.00E+00 | NA | Inf      | NA | (14.9,Inf] | NA | NA       |
| 2623 | NA | NA | NA       | NA | Inf      | NA | NA         | NA | NA       |
| 2624 | NA | NA | NA       | NA | 0.00E+00 | NA | NA         | NA | NA       |
| 2625 | NA | NA | NA       | NA | 0.00E+00 | NA | NA         | NA | NA       |
| 2626 | NA | NA | NA       | NA | Inf      | NA | NA         | NA | NA       |
| 2627 | NA | NA | Inf      | NA | Inf      | NA | NA         | NA | (21,Inf] |
| 2628 | NA | NA | NA       | NA | 0.00E+00 | NA | NA         | NA | NA       |
| 2629 | NA | NA | NA       | NA | 0.00E+00 | NA | NA         | NA | NA       |
| 2630 | NA | NA | Inf      | NA | NA       | NA | NA         | NA | NA       |
| 2631 | NA | NA | NA       | NA | Inf      | NA | NA         | NA | NA       |
| 2632 | NA | NA | NA       | NA | 0.00E+00 | NA | NA         | NA | NA       |
| 2633 | NA | NA | NA       | NA | Inf      | NA | NA         | NA | NA       |
| 2634 | NA | NA | NA       | NA | Inf      | NA | NA         | NA | NA       |
| 2635 | NA | NA | NA       | NA | 0.00E+00 | NA | NA         | NA | NA       |
| 2636 | NA | NA | Inf      | NA | 0.00E+00 | NA | NA         | NA | (21,Inf] |
| 2637 | NA | NA | NA       | NA | Inf      | NA | NA         | NA | NA       |
| 2638 | NA | NA | NA       | NA | Inf      | NA | NA         | NA | NA       |
| 2639 | NA | NA | NA       | NA | 0.00E+00 | NA | NA         | NA | NA       |
| 2640 | NA | NA | NA       | NA | Inf      | NA | NA         | NA | NA       |
| 2641 | NA | NA | NA       | NA | 0.00E+00 | NA | NA         | NA | NA       |
| 2642 | NA | NA | NA       | NA | 0.00E+00 | NA | NA         | NA | NA       |
| 2643 | NA | NA | Inf      | NA | 0.00E+00 | NA | NA         | NA | (21,Inf] |
| 2644 | NA | NA | 0.00E+00 | NA | Inf      | NA | (14.9,Inf] | NA | NA       |
| 2645 | NA | NA | NA       | NA | Inf      | NA | NA         | NA | NA       |
| 2646 | NA | NA | NA       | NA | Inf      | NA | NA         | NA | NA       |
| 2647 | NA | NA | NA       | NA | Inf      | NA | NA         | NA | NA       |
| 2648 | NA | NA | NA       | NA | Inf      | NA | NA         | NA | NA       |
| 2649 | NA | NA | NA       | NA | 0.00E+00 | NA | NA         | NA | NA       |
| 2650 | NA | NA | NA       | NA | Inf      | NA | NA         | NA | NA       |
| 2651 | NA | NA | NA       | NA | Inf      | NA | NA         | NA | NA       |
| 2652 | NA | NA | NA       | NA | Inf      | NA | NA         | NA | NA       |
| 2653 | NA | NA | NA       | NA | Inf      | NA | NA         | NA | NA       |
| 2654 | NA | NA | NA       | NA | Inf      | NA | NA         | NA | NA       |
| 2655 | NA | NA | NA       | NA | 0.00E+00 | NA | NA         | NA | NA       |
| 2656 | NA | NA | NA       | NA | 0.00E+00 | NA | NA         | NA | NA       |

|      |    |    |          |    |          |    |             |    |          |
|------|----|----|----------|----|----------|----|-------------|----|----------|
| 2657 | NA | NA | NA       | NA | Inf      | NA | NA          | NA | NA       |
| 2658 | NA | NA | Inf      | NA | 0.00E+00 | NA | NA          | NA | (21,Inf] |
| 2659 | NA | NA | NA       | NA | 0.00E+00 | NA | NA          | NA | NA       |
| 2660 | NA | NA | NA       | NA | Inf      | NA | NA          | NA | NA       |
| 2661 | NA | NA | 0.00E+00 | NA | Inf      | NA | (14.9,Inf]  | NA | NA       |
| 2662 | NA | NA | 5.69E+00 | NA | Inf      | NA | (14.9,Inf]  | NA | (21,Inf] |
| 2663 | NA | NA | NA       | NA | Inf      | NA | NA          | NA | NA       |
| 2664 | NA | NA | NA       | NA | 0.00E+00 | NA | NA          | NA | NA       |
| 2665 | NA | NA | NA       | NA | Inf      | NA | NA          | NA | NA       |
| 2666 | NA | NA | NA       | NA | Inf      | NA | NA          | NA | NA       |
| 2667 | NA | NA | NA       | NA | Inf      | NA | NA          | NA | NA       |
| 2668 | NA | NA | NA       | NA | Inf      | NA | NA          | NA | NA       |
| 2669 | NA | NA | NA       | NA | Inf      | NA | NA          | NA | NA       |
| 2670 | NA | NA | NA       | NA | 0.00E+00 | NA | NA          | NA | NA       |
| 2671 | NA | NA | NA       | NA | 0.00E+00 | NA | NA          | NA | NA       |
| 2672 | NA | NA | NA       | NA | Inf      | NA | NA          | NA | NA       |
| 2673 | NA | NA | NA       | NA | Inf      | NA | NA          | NA | NA       |
| 2674 | NA | NA | NA       | NA | 0.00E+00 | NA | NA          | NA | NA       |
| 2675 | NA | NA | Inf      | NA | 0.00E+00 | NA | NA          | NA | (21,Inf] |
| 2676 | NA | NA | NA       | NA | Inf      | NA | NA          | NA | NA       |
| 2677 | NA | NA | NA       | NA | Inf      | NA | NA          | NA | NA       |
| 2678 | NA | NA | NA       | NA | 0.00E+00 | NA | NA          | NA | NA       |
| 2679 | NA | NA | 7.23E+00 | NA | Inf      | NA | (14.9,Inf]  | NA | (21,Inf] |
| 2680 | NA | NA | NA       | NA | Inf      | NA | NA          | NA | NA       |
| 2681 | NA | NA | NA       | NA | Inf      | NA | NA          | NA | NA       |
| 2682 | NA | NA | Inf      | NA | Inf      | NA | NA          | NA | (21,Inf] |
| 2683 | NA | NA | NA       | NA | Inf      | NA | NA          | NA | NA       |
| 2684 | NA | NA | 0.00E+00 | NA | Inf      | NA | (14.9,Inf]  | NA | NA       |
| 2685 | NA | NA | 1.74E+02 | NA | 0.00E+00 | NA | (1.34,14.9] | NA | (21,Inf] |
| 2686 | NA | NA | 0.00E+00 | NA | Inf      | NA | (14.9,Inf]  | NA | NA       |
| 2687 | NA | NA | NA       | NA | Inf      | NA | NA          | NA | NA       |
| 2688 | NA | NA | NA       | NA | Inf      | NA | NA          | NA | NA       |
| 2689 | NA | NA | NA       | NA | 0.00E+00 | NA | NA          | NA | NA       |
| 2690 | NA | NA | NA       | NA | Inf      | NA | NA          | NA | NA       |
| 2691 | NA | NA | NA       | NA | 0.00E+00 | NA | NA          | NA | NA       |
| 2692 | NA | NA | 0.00E+00 | NA | NA       | NA | NA          | NA | NA       |
| 2693 | NA | NA | 0.00E+00 | NA | Inf      | NA | (14.9,Inf]  | NA | NA       |
| 2694 | NA | NA | 0.00E+00 | NA | Inf      | NA | (14.9,Inf]  | NA | NA       |

|      |    |    |          |    |          |    |            |    |            |
|------|----|----|----------|----|----------|----|------------|----|------------|
| 2695 | NA | NA | 2.63E+01 | NA | Inf      | NA | (14.9,Inf] | NA | (21,Inf]   |
| 2696 | NA | NA | NA       | NA | 0.00E+00 | NA | NA         | NA | NA         |
| 2697 | NA | NA | NA       | NA | Inf      | NA | NA         | NA | NA         |
| 2698 | NA | NA | 0.00E+00 | NA | Inf      | NA | (14.9,Inf] | NA | NA         |
| 2699 | NA | NA | NA       | NA | 0.00E+00 | NA | NA         | NA | NA         |
| 2700 | NA | NA | Inf      | NA | Inf      | NA | NA         | NA | (0.192,21] |
| 2701 | NA | NA | NA       | NA | 0.00E+00 | NA | NA         | NA | NA         |
| 2702 | NA | NA | 0.00E+00 | NA | Inf      | NA | (14.9,Inf] | NA | NA         |
| 2703 | NA | NA | NA       | NA | Inf      | NA | NA         | NA | NA         |
| 2704 | NA | NA | NA       | NA | Inf      | NA | NA         | NA | NA         |
| 2705 | NA | NA | NA       | NA | Inf      | NA | NA         | NA | NA         |
| 2706 | NA | NA | NA       | NA | Inf      | NA | NA         | NA | NA         |
| 2707 | NA | NA | NA       | NA | Inf      | NA | NA         | NA | NA         |
| 2708 | NA | NA | 0.00E+00 | NA | 0.00E+00 | NA | (14.9,Inf] | NA | NA         |
| 2709 | NA | NA | 1.94E+02 | NA | NA       | NA | (14.9,Inf] | NA | (21,Inf]   |
| 2710 | NA | NA | 1.04E+02 | NA | NA       | NA | NA         | NA | NA         |
| 2711 | NA | NA | 1.02E+02 | NA | NA       | NA | (14.9,Inf] | NA | (21,Inf]   |
| 2712 | NA | NA | 4.20E+01 | NA | NA       | NA | (14.9,Inf] | NA | (21,Inf]   |
| 2713 | NA | NA | 3.75E+00 | NA | NA       | NA | (14.9,Inf] | NA | (21,Inf]   |
| 2714 | NA | NA | 3.11E+00 | NA | NA       | NA | NA         | NA | NA         |
| 2715 | NA | NA | 2.83E+00 | NA | NA       | NA | (14.9,Inf] | NA | (21,Inf]   |
| 2716 | NA | NA | 2.60E+00 | NA | NA       | NA | (14.9,Inf] | NA | (21,Inf]   |
| 2717 | NA | NA | 1.93E+00 | NA | NA       | NA | NA         | NA | NA         |
| 2718 | NA | NA | 1.87E+00 | NA | NA       | NA | NA         | NA | NA         |
| 2719 | NA | NA | 1.11E+00 | NA | NA       | NA | NA         | NA | NA         |
| 2720 | NA | NA | 1.08E+00 | NA | NA       | NA | (14.9,Inf] | NA | (21,Inf]   |
| 2721 | NA | NA | 5.12E-01 | NA | NA       | NA | (14.9,Inf] | NA | (21,Inf]   |
| 2722 | NA | NA | 5.11E-01 | NA | NA       | NA | NA         | NA | NA         |
| 2723 | NA | NA | 3.04E-02 | NA | NA       | NA | NA         | NA | NA         |



| Row<br>Number | Bins                       |                                |                            |                              |                              |
|---------------|----------------------------|--------------------------------|----------------------------|------------------------------|------------------------------|
|               | Wash02GRvsWash0<br>1GRbins | Wash02PCFTvsWas<br>h01PCFTbins | ElutePCFTvsEluteGR<br>bins | Wash01PCFTvsWas<br>h01GRbins | Wash02PCFTvsWas<br>h02GRbins |
| 1             | (0.00386,0.00875]          | (0.00292,0.00665]              | (0.46,Inf]                 | (0.936,1.11]                 | (0.798,1.72]                 |
| 2             | (0.00386,0.00875]          | (0.00292,0.00665]              | NA                         | (0.936,1.11]                 | (0.798,1.72]                 |
| 3             | (0.00875,Inf]              | (0.00665,Inf]                  | (0.46,Inf]                 | (1.11,Inf]                   | (0.798,1.72]                 |
| 4             | (0.00179,0.00386]          | (0.00125,0.00292]              | (0,0.46]                   | (0.936,1.11]                 | (0.213,0.798]                |
| 5             | (0.00179,0.00386]          | (0.00292,0.00665]              | (0,0.46]                   | (0.936,1.11]                 | (0.798,1.72]                 |
| 6             | (0,0.00179]                | (0.00125,0.00292]              | (0,0.46]                   | (1.11,Inf]                   | (0.798,1.72]                 |
| 7             | (0.00386,0.00875]          | (0.00292,0.00665]              | (0.46,Inf]                 | (0.936,1.11]                 | (0.213,0.798]                |
| 8             | (0.00875,Inf]              | (0.00665,Inf]                  | (0.46,Inf]                 | (1.11,Inf]                   | (0.798,1.72]                 |
| 9             | (0.00875,Inf]              | (0.00665,Inf]                  | (0,0.46]                   | (1.11,Inf]                   | (1.72,Inf]                   |
| 10            | (0,0.00179]                | (0.00125,0.00292]              | (0.46,Inf]                 | (0.731,0.936]                | (0.798,1.72]                 |
| 11            | (0.00179,0.00386]          | (0.00125,0.00292]              | (0.46,Inf]                 | (0.731,0.936]                | (0.798,1.72]                 |
| 12            | (0.00386,0.00875]          | (0.00665,Inf]                  | (0.46,Inf]                 | (0.936,1.11]                 | (0.798,1.72]                 |
| 13            | (0.00179,0.00386]          | (0.00125,0.00292]              | (0,0.46]                   | (0.936,1.11]                 | (0.798,1.72]                 |
| 14            | (0.00179,0.00386]          | (0.00292,0.00665]              | (0.46,Inf]                 | (0.936,1.11]                 | (0.798,1.72]                 |
| 15            | (0.00179,0.00386]          | (0.00125,0.00292]              | (0,0.46]                   | (0.936,1.11]                 | (0.213,0.798]                |
| 16            | (0.00179,0.00386]          | (0.00125,0.00292]              | NA                         | (0.936,1.11]                 | (0.213,0.798]                |
| 17            | (0.00179,0.00386]          | (0.00292,0.00665]              | (0.46,Inf]                 | (0.936,1.11]                 | (0.798,1.72]                 |
| 18            | (0.00386,0.00875]          | (0.00292,0.00665]              | (0,0.46]                   | (0.936,1.11]                 | (0.213,0.798]                |
| 19            | (0.00179,0.00386]          | (0.00125,0.00292]              | (0,0.46]                   | (0.936,1.11]                 | (0.798,1.72]                 |
| 20            | (0,0.00179]                | (0.00125,0.00292]              | (0,0.46]                   | (0.936,1.11]                 | (0.798,1.72]                 |
| 21            | (0,0.00179]                | (0,0.00125]                    | (0.46,Inf]                 | (1.11,Inf]                   | (0.798,1.72]                 |
| 22            | (0,0.00179]                | (0.00125,0.00292]              | (0,0.46]                   | (0.936,1.11]                 | (0.798,1.72]                 |
| 23            | (0,0.00179]                | (0,0.00125]                    | NA                         | (0.936,1.11]                 | (1.72,Inf]                   |
| 24            | (0.00179,0.00386]          | (0.00292,0.00665]              | (0.46,Inf]                 | (1.11,Inf]                   | (0.798,1.72]                 |
| 25            | (0.00179,0.00386]          | (0.00125,0.00292]              | (0,0.46]                   | (1.11,Inf]                   | (0.798,1.72]                 |
| 26            | (0.00875,Inf]              | (0.00665,Inf]                  | NA                         | (1.11,Inf]                   | (0.213,0.798]                |
| 27            | (0,0.00179]                | (0.00125,0.00292]              | (0,0.46]                   | (0.936,1.11]                 | (0.798,1.72]                 |
| 28            | (0.00179,0.00386]          | (0.00292,0.00665]              | NA                         | (0.936,1.11]                 | (0.798,1.72]                 |
| 29            | (0.00386,0.00875]          | (0.00292,0.00665]              | NA                         | (0.936,1.11]                 | (0.798,1.72]                 |
| 30            | (0.00179,0.00386]          | (0.00125,0.00292]              | (0.46,Inf]                 | (0.936,1.11]                 | (0.798,1.72]                 |
| 31            | (0,0.00179]                | (0.00125,0.00292]              | (0.46,Inf]                 | (0.936,1.11]                 | (0.798,1.72]                 |
| 32            | (0.00386,0.00875]          | (0.00125,0.00292]              | (0,0.46]                   | (1.11,Inf]                   | (0.213,0.798]                |
| 33            | (0.00386,0.00875]          | (0.00125,0.00292]              | NA                         | (0.936,1.11]                 | (0.213,0.798]                |
| 34            | (0.00875,Inf]              | (0.00665,Inf]                  | (0,0.46]                   | (1.11,Inf]                   | (0.798,1.72]                 |

|    |                   |                   |            |               |               |
|----|-------------------|-------------------|------------|---------------|---------------|
| 35 | (0.00179,0.00386] | (0.00292,0.00665] | (0.46,Inf] | (0.936,1.11]  | (0.798,1.72]  |
| 36 | (0.00179,0.00386] | (0.00292,0.00665] | (0,0.46]   | (0.936,1.11]  | (0.798,1.72]  |
| 37 | (0.00179,0.00386] | (0.00125,0.00292] | (0,0.46]   | (0.936,1.11]  | (0.213,0.798] |
| 38 | (0.00179,0.00386] | (0.00292,0.00665] | (0.46,Inf] | (0.936,1.11]  | (0.798,1.72]  |
| 39 | (0,0.00179]       | (0.00125,0.00292] | NA         | (1.11,Inf]    | (0.798,1.72]  |
| 40 | (0.00179,0.00386] | (0.00125,0.00292] | (0.46,Inf] | (0.936,1.11]  | (0.213,0.798] |
| 41 | (0,0.00179]       | (0.00125,0.00292] | NA         | (0.936,1.11]  | (0.798,1.72]  |
| 42 | (0,0.00179]       | (0.00125,0.00292] | NA         | (0.936,1.11]  | (0.798,1.72]  |
| 43 | (0.00179,0.00386] | (0.00292,0.00665] | NA         | (0.936,1.11]  | (0.798,1.72]  |
| 44 | (0.00179,0.00386] | (0.00125,0.00292] | NA         | (0.936,1.11]  | (0.798,1.72]  |
| 45 | (0.00875,Inf]     | (0.00665,Inf]     | (0.46,Inf] | (1.11,Inf]    | (0.798,1.72]  |
| 46 | (0.00179,0.00386] | (0.00292,0.00665] | (0.46,Inf] | (0.936,1.11]  | (0.798,1.72]  |
| 47 | (0,0.00179]       | (0,0.00125]       | NA         | (0.936,1.11]  | (0.798,1.72]  |
| 48 | (0,0.00179]       | (0.00125,0.00292] | (0,0.46]   | (0.936,1.11]  | (0.798,1.72]  |
| 49 | (0,0.00179]       | (0.00125,0.00292] | (0,0.46]   | (0.936,1.11]  | (0.798,1.72]  |
| 50 | (0.00875,Inf]     | (0.00665,Inf]     | (0.46,Inf] | (1.11,Inf]    | (0.798,1.72]  |
| 51 | (0.00386,0.00875] | (0.00292,0.00665] | NA         | (0.936,1.11]  | (0.798,1.72]  |
| 52 | (0.00179,0.00386] | (0.00125,0.00292] | (0,0.46]   | (1.11,Inf]    | (0.213,0.798] |
| 53 | (0.00179,0.00386] | (0.00125,0.00292] | NA         | (0.936,1.11]  | (0.798,1.72]  |
| 54 | (0,0.00179]       | (0.00125,0.00292] | NA         | (0.936,1.11]  | (0.798,1.72]  |
| 55 | (0,0.00179]       | (0.00125,0.00292] | NA         | (0.731,0.936] | (1.72,Inf]    |
| 56 | (0.00386,0.00875] | (0.00292,0.00665] | NA         | (1.11,Inf]    | (0.213,0.798] |
| 57 | (0.00386,0.00875] | (0.00292,0.00665] | (0,0.46]   | (1.11,Inf]    | (0.798,1.72]  |
| 58 | (0.00386,0.00875] | (0.00292,0.00665] | (0,0.46]   | (1.11,Inf]    | (0.798,1.72]  |
| 59 | (0.00386,0.00875] | (0.00292,0.00665] | NA         | (1.11,Inf]    | (0.798,1.72]  |
| 60 | (0,0.00179]       | (0.00125,0.00292] | (0,0.46]   | (0.936,1.11]  | (1.72,Inf]    |
| 61 | (0.00179,0.00386] | (0.00292,0.00665] | NA         | (0.936,1.11]  | (0.798,1.72]  |
| 62 | (0.00179,0.00386] | (0.00292,0.00665] | NA         | (0.936,1.11]  | (1.72,Inf]    |
| 63 | (0.00179,0.00386] | (0.00292,0.00665] | NA         | (0.936,1.11]  | (0.798,1.72]  |
| 64 | (0.00386,0.00875] | (0.00292,0.00665] | NA         | (0.731,0.936] | (0.798,1.72]  |
| 65 | (0.00179,0.00386] | (0.00125,0.00292] | (0.46,Inf] | (0.936,1.11]  | (0.213,0.798] |
| 66 | (0,0.00179]       | (0.00665,Inf]     | (0.46,Inf] | (0.731,0.936] | (1.72,Inf]    |
| 67 | (0,0.00179]       | (0.00125,0.00292] | (0.46,Inf] | (0.936,1.11]  | (0.798,1.72]  |
| 68 | (0.00179,0.00386] | (0.00125,0.00292] | (0,0.46]   | (0.936,1.11]  | (0.798,1.72]  |
| 69 | NA                | NA                | NA         | (1.11,Inf]    | NA            |
| 70 | (0.00386,0.00875] | (0.00665,Inf]     | (0,0.46]   | (0.731,0.936] | (0.798,1.72]  |
| 71 | (0,0.00179]       | (0.00125,0.00292] | (0.46,Inf] | (0.936,1.11]  | (0.798,1.72]  |
| 72 | (0.00179,0.00386] | (0.00292,0.00665] | (0.46,Inf] | (1.11,Inf]    | (0.798,1.72]  |

|     |                   |                   |            |               |               |
|-----|-------------------|-------------------|------------|---------------|---------------|
| 73  | (0.00179,0.00386] | (0.00292,0.00665] | NA         | (0.731,0.936] | (0.798,1.72]  |
| 74  | (0,0.00179]       | (0.00292,0.00665] | (0.46,Inf] | (0.731,0.936] | (1.72,Inf]    |
| 75  | (0.00179,0.00386] | (0.00292,0.00665] | NA         | (0.936,1.11]  | (1.72,Inf]    |
| 76  | (0.00179,0.00386] | (0.00292,0.00665] | NA         | (0.936,1.11]  | (0.798,1.72]  |
| 77  | (0.00179,0.00386] | (0.00125,0.00292] | NA         | (1.11,Inf]    | (0.798,1.72]  |
| 78  | (0,0.00179]       | (0.00125,0.00292] | (0.46,Inf] | (0.936,1.11]  | (0.798,1.72]  |
| 79  | (0.00179,0.00386] | (0.00292,0.00665] | (0.46,Inf] | (0.936,1.11]  | (0.798,1.72]  |
| 80  | (0.00179,0.00386] | (0.00292,0.00665] | (0.46,Inf] | (0.936,1.11]  | (0.798,1.72]  |
| 81  | (0.00386,0.00875] | (0.00665,Inf]     | (0,0.46]   | (0.936,1.11]  | (1.72,Inf]    |
| 82  | (0.00179,0.00386] | (0.00125,0.00292] | (0.46,Inf] | (1.11,Inf]    | (0.798,1.72]  |
| 83  | (0.00386,0.00875] | (0.00292,0.00665] | (0.46,Inf] | (0.936,1.11]  | (0.798,1.72]  |
| 84  | (0.00179,0.00386] | (0.00125,0.00292] | (0.46,Inf] | (0.936,1.11]  | (0.798,1.72]  |
| 85  | (0.00386,0.00875] | (0.00292,0.00665] | NA         | (0.936,1.11]  | (0.798,1.72]  |
| 86  | (0.00179,0.00386] | (0.00292,0.00665] | NA         | (1.11,Inf]    | (0.798,1.72]  |
| 87  | (0.00179,0.00386] | (0.00125,0.00292] | NA         | (1.11,Inf]    | (0.798,1.72]  |
| 88  | (0.00179,0.00386] | (0.00125,0.00292] | (0.46,Inf] | (1.11,Inf]    | (0.798,1.72]  |
| 89  | (0,0.00179]       | (0,0.00125]       | NA         | (0.936,1.11]  | (0.798,1.72]  |
| 90  | (0.00179,0.00386] | (0.00292,0.00665] | (0.46,Inf] | (0.731,0.936] | (0.798,1.72]  |
| 91  | (0,0.00179]       | (0,0.00125]       | NA         | (0.936,1.11]  | (0.213,0.798] |
| 92  | (0,0.00179]       | (0,0.00125]       | NA         | (0.731,0.936] | (0.213,0.798] |
| 93  | (0.00386,0.00875] | (0.00125,0.00292] | NA         | (0.731,0.936] | (0.213,0.798] |
| 94  | (0.00386,0.00875] | (0.00292,0.00665] | (0,0.46]   | (0.936,1.11]  | (0.798,1.72]  |
| 95  | (0,0.00179]       | (0,0.00125]       | NA         | (0.936,1.11]  | (0.798,1.72]  |
| 96  | (0,0.00179]       | (0.00125,0.00292] | NA         | (0.731,0.936] | (0.798,1.72]  |
| 97  | (0.00179,0.00386] | (0.00292,0.00665] | NA         | (0.936,1.11]  | (1.72,Inf]    |
| 98  | (0.00179,0.00386] | (0.00125,0.00292] | NA         | (0.936,1.11]  | (0.213,0.798] |
| 99  | (0.00179,0.00386] | (0.00125,0.00292] | (0.46,Inf] | (0.936,1.11]  | (0.798,1.72]  |
| 100 | (0,0.00179]       | (0,0.00125]       | NA         | (0.731,0.936] | (0.798,1.72]  |
| 101 | (0.00179,0.00386] | (0.00125,0.00292] | NA         | (0.731,0.936] | (0.213,0.798] |
| 102 | (0.00179,0.00386] | (0,0.00125]       | (0,0.46]   | (0.936,1.11]  | (0.213,0.798] |
| 103 | (0.00386,0.00875] | (0.00125,0.00292] | NA         | (0.731,0.936] | (0.213,0.798] |
| 104 | (0,0.00179]       | (0.00125,0.00292] | NA         | (0.936,1.11]  | (1.72,Inf]    |
| 105 | (0.00179,0.00386] | (0.00125,0.00292] | NA         | (0.936,1.11]  | (0.798,1.72]  |
| 106 | (0.00386,0.00875] | (0.00125,0.00292] | NA         | (1.11,Inf]    | (0.213,0.798] |
| 107 | (0,0.00179]       | (0,0.00125]       | NA         | (0,0.731]     | (0.213,0.798] |
| 108 | (0.00179,0.00386] | (0.00292,0.00665] | (0.46,Inf] | (0.731,0.936] | (0.798,1.72]  |
| 109 | (0.00386,0.00875] | (0.00665,Inf]     | NA         | (0.731,0.936] | (1.72,Inf]    |
| 110 | (0,0.00179]       | (0.00125,0.00292] | NA         | (0.936,1.11]  | (0.798,1.72]  |

|     |                   |                   |            |               |               |
|-----|-------------------|-------------------|------------|---------------|---------------|
| 111 | (0.00386,0.00875] | (0,0.00125]       | NA         | (1.11,Inf]    | (0.213,0.798] |
| 112 | (0.00179,0.00386] | (0,0.00125]       | (0.46,Inf] | (0.936,1.11]  | (0.213,0.798] |
| 113 | (0.00179,0.00386] | (0.00292,0.00665] | NA         | (1.11,Inf]    | (0.798,1.72]  |
| 114 | (0.00179,0.00386] | (0.00125,0.00292] | NA         | (0.936,1.11]  | (0.798,1.72]  |
| 115 | (0,0.00179]       | (0.00125,0.00292] | NA         | (0.936,1.11]  | (0.798,1.72]  |
| 116 | (0.00179,0.00386] | (0.00125,0.00292] | NA         | (0.936,1.11]  | (0.798,1.72]  |
| 117 | (0,0.00179]       | (0.00125,0.00292] | NA         | (0.936,1.11]  | (1.72,Inf]    |
| 118 | (0.00386,0.00875] | (0.00292,0.00665] | (0.46,Inf] | (0.936,1.11]  | (0.798,1.72]  |
| 119 | (0,0.00179]       | (0,0.00125]       | NA         | (0.936,1.11]  | (0.213,0.798] |
| 120 | (0.00179,0.00386] | (0.00125,0.00292] | NA         | (0.936,1.11]  | (0.798,1.72]  |
| 121 | (0.00386,0.00875] | (0.00125,0.00292] | NA         | (0.936,1.11]  | (0.213,0.798] |
| 122 | (0.00386,0.00875] | (0.00292,0.00665] | (0.46,Inf] | (1.11,Inf]    | (0.798,1.72]  |
| 123 | (0.00386,0.00875] | (0.00292,0.00665] | NA         | (0.936,1.11]  | (0.798,1.72]  |
| 124 | (0.00179,0.00386] | (0.00125,0.00292] | NA         | (0.731,0.936] | (0.798,1.72]  |
| 125 | (0.00179,0.00386] | (0.00125,0.00292] | (0.46,Inf] | (0.731,0.936] | (0.213,0.798] |
| 126 | (0.00179,0.00386] | (0.00125,0.00292] | NA         | (0.731,0.936] | (0.798,1.72]  |
| 127 | (0.00179,0.00386] | (0.00125,0.00292] | NA         | (0.936,1.11]  | (0.798,1.72]  |
| 128 | (0.00179,0.00386] | (0.00125,0.00292] | (0,0.46]   | (1.11,Inf]    | (0.213,0.798] |
| 129 | (0.00179,0.00386] | (0.00125,0.00292] | (0,0.46]   | (1.11,Inf]    | (0.213,0.798] |
| 130 | (0,0.00179]       | (0.00125,0.00292] | NA         | (0.936,1.11]  | (0.798,1.72]  |
| 131 | (0.00386,0.00875] | (0.00292,0.00665] | NA         | (1.11,Inf]    | (0.798,1.72]  |
| 132 | (0.00179,0.00386] | (0.00292,0.00665] | NA         | (0.936,1.11]  | (0.798,1.72]  |
| 133 | (0.00179,0.00386] | (0.00292,0.00665] | NA         | (0.731,0.936] | (0.798,1.72]  |
| 134 | (0.00179,0.00386] | (0.00125,0.00292] | NA         | (0.936,1.11]  | (0.798,1.72]  |
| 135 | (0,0.00179]       | (0,0.00125]       | NA         | (1.11,Inf]    | (0.798,1.72]  |
| 136 | (0.00179,0.00386] | (0.00125,0.00292] | NA         | (0.731,0.936] | (0.213,0.798] |
| 137 | (0.00179,0.00386] | (0.00292,0.00665] | NA         | (0.936,1.11]  | (0.798,1.72]  |
| 138 | (0.00386,0.00875] | (0.00292,0.00665] | NA         | (0.936,1.11]  | (0.213,0.798] |
| 139 | (0.00386,0.00875] | (0.00292,0.00665] | NA         | (0.936,1.11]  | (0.798,1.72]  |
| 140 | (0.00179,0.00386] | (0.00292,0.00665] | (0.46,Inf] | (0.936,1.11]  | (0.798,1.72]  |
| 141 | (0,0.00179]       | (0.00125,0.00292] | NA         | (0.731,0.936] | (0.798,1.72]  |
| 142 | (0.00386,0.00875] | (0.00292,0.00665] | (0.46,Inf] | (1.11,Inf]    | (0.798,1.72]  |
| 143 | (0.00386,0.00875] | (0.00665,Inf]     | NA         | (0.936,1.11]  | (1.72,Inf]    |
| 144 | (0.00179,0.00386] | (0.00125,0.00292] | NA         | (0.936,1.11]  | (0.213,0.798] |
| 145 | (0.00386,0.00875] | (0.00292,0.00665] | NA         | (0.731,0.936] | (0.213,0.798] |
| 146 | (0,0.00179]       | (0.00125,0.00292] | NA         | (0.731,0.936] | (0.798,1.72]  |
| 147 | (0.00179,0.00386] | (0.00125,0.00292] | (0.46,Inf] | (1.11,Inf]    | (0.798,1.72]  |
| 148 | (0,0.00179]       | (0.00125,0.00292] | NA         | (0.936,1.11]  | (0.798,1.72]  |

|     |                   |                   |            |               |               |
|-----|-------------------|-------------------|------------|---------------|---------------|
| 149 | (0.00179,0.00386] | (0.00125,0.00292] | (0,0.46]   | (0.936,1.11]  | (0.213,0.798] |
| 150 | (0.00179,0.00386] | (0.00125,0.00292] | NA         | (0.936,1.11]  | (0.798,1.72]  |
| 151 | (0.00179,0.00386] | (0.00125,0.00292] | (0,0.46]   | (0.936,1.11]  | (0.798,1.72]  |
| 152 | (0.00386,0.00875] | (0.00125,0.00292] | NA         | (0.936,1.11]  | (0.213,0.798] |
| 153 | (0.00386,0.00875] | (0.00125,0.00292] | (0,0.46]   | (0.936,1.11]  | (0.213,0.798] |
| 154 | (0,0.00179]       | (0.00125,0.00292] | (0,0.46]   | (0.936,1.11]  | (0.798,1.72]  |
| 155 | (0.00179,0.00386] | (0,0.00125]       | NA         | (0.731,0.936] | (0.213,0.798] |
| 156 | (0.00386,0.00875] | (0.00292,0.00665] | NA         | (0.936,1.11]  | (0.798,1.72]  |
| 157 | (0.00179,0.00386] | (0.00125,0.00292] | (0.46,Inf] | (1.11,Inf]    | (0.798,1.72]  |
| 158 | (0.00386,0.00875] | (0.00665,Inf]     | NA         | (0.936,1.11]  | (0.798,1.72]  |
| 159 | (0,0.00179]       | (0.00292,0.00665] | (0,0.46]   | (0.936,1.11]  | (1.72,Inf]    |
| 160 | (0.00386,0.00875] | (0.00292,0.00665] | (0.46,Inf] | (0.731,0.936] | (0.213,0.798] |
| 161 | (0,0.00179]       | (0.00125,0.00292] | NA         | (0.936,1.11]  | (0.798,1.72]  |
| 162 | (0.00386,0.00875] | (0.00292,0.00665] | NA         | (1.11,Inf]    | (0.798,1.72]  |
| 163 | (0.00179,0.00386] | (0.00292,0.00665] | NA         | (0.731,0.936] | (0.798,1.72]  |
| 164 | (0,0.00179]       | (0.00125,0.00292] | NA         | (0.731,0.936] | (0.798,1.72]  |
| 165 | (0,0.00179]       | (0.00125,0.00292] | NA         | (0.936,1.11]  | (0.798,1.72]  |
| 166 | (0.00386,0.00875] | (0.00125,0.00292] | NA         | (1.11,Inf]    | (0.213,0.798] |
| 167 | (0,0.00179]       | (0.00125,0.00292] | NA         | (0.936,1.11]  | (0.798,1.72]  |
| 168 | (0,0.00179]       | (0.00665,Inf]     | NA         | (0,0.731]     | (1.72,Inf]    |
| 169 | (0.00386,0.00875] | (0.00665,Inf]     | (0.46,Inf] | (0.936,1.11]  | (0.798,1.72]  |
| 170 | (0.00386,0.00875] | (0.00292,0.00665] | NA         | (0.936,1.11]  | (0.798,1.72]  |
| 171 | (0,0.00179]       | (0,0.00125]       | (0.46,Inf] | (1.11,Inf]    | (0.798,1.72]  |
| 172 | (0.00179,0.00386] | (0.00125,0.00292] | NA         | (1.11,Inf]    | (0.798,1.72]  |
| 173 | (0.00179,0.00386] | (0.00125,0.00292] | NA         | (0.936,1.11]  | (0.798,1.72]  |
| 174 | (0.00179,0.00386] | (0.00292,0.00665] | NA         | (0.731,0.936] | (0.798,1.72]  |
| 175 | (0.00179,0.00386] | (0.00125,0.00292] | NA         | (0.731,0.936] | (0.213,0.798] |
| 176 | (0.00875,Inf]     | (0.00292,0.00665] | NA         | (0.936,1.11]  | (0.213,0.798] |
| 177 | (0.00386,0.00875] | (0.00292,0.00665] | NA         | (0.731,0.936] | (0.213,0.798] |
| 178 | (0.00875,Inf]     | (0.00665,Inf]     | NA         | (0.731,0.936] | (0.798,1.72]  |
| 179 | (0.00386,0.00875] | (0.00125,0.00292] | NA         | (0.936,1.11]  | (0.213,0.798] |
| 180 | (0.00179,0.00386] | (0.00125,0.00292] | NA         | (1.11,Inf]    | (0.798,1.72]  |
| 181 | (0.00179,0.00386] | (0.00125,0.00292] | (0,0.46]   | (0.936,1.11]  | (0.798,1.72]  |
| 182 | (0.00386,0.00875] | (0.00125,0.00292] | (0.46,Inf] | (0.731,0.936] | (0.213,0.798] |
| 183 | (0,0.00179]       | (0.00125,0.00292] | NA         | (0.731,0.936] | (0.798,1.72]  |
| 184 | (0.00386,0.00875] | (0.00292,0.00665] | NA         | (1.11,Inf]    | (0.798,1.72]  |
| 185 | (0.00179,0.00386] | (0.00125,0.00292] | NA         | (0.731,0.936] | (0.798,1.72]  |
| 186 | (0,0.00179]       | (0.00665,Inf]     | NA         | (0.731,0.936] | (1.72,Inf]    |

|     |                   |                   |            |               |               |
|-----|-------------------|-------------------|------------|---------------|---------------|
| 187 | (0,0.00179]       | (0,0.00125]       | NA         | (0.936,1.11]  | (0.798,1.72]  |
| 188 | (0.00179,0.00386] | (0.00292,0.00665] | NA         | (0.731,0.936] | (0.798,1.72]  |
| 189 | (0.00179,0.00386] | (0.00292,0.00665] | NA         | (1.11,Inf]    | (0.798,1.72]  |
| 190 | (0.00179,0.00386] | (0.00125,0.00292] | NA         | (0.936,1.11]  | (0.798,1.72]  |
| 191 | (0.00386,0.00875] | (0.00292,0.00665] | NA         | (1.11,Inf]    | (0.798,1.72]  |
| 192 | (0.00179,0.00386] | (0.00292,0.00665] | NA         | (1.11,Inf]    | (0.798,1.72]  |
| 193 | (0.00179,0.00386] | (0.00125,0.00292] | NA         | (0.731,0.936] | (0.213,0.798] |
| 194 | (0.00875,Inf]     | (0.00292,0.00665] | NA         | (0.936,1.11]  | (0.213,0.798] |
| 195 | (0.00386,0.00875] | (0.00292,0.00665] | NA         | (0.731,0.936] | (0.798,1.72]  |
| 196 | (0,0.00179]       | (0,0.00125]       | NA         | (0.936,1.11]  | (0.213,0.798] |
| 197 | (0.00179,0.00386] | (0.00292,0.00665] | NA         | (0.936,1.11]  | (0.798,1.72]  |
| 198 | (0.00179,0.00386] | (0.00125,0.00292] | NA         | (0.936,1.11]  | (0.798,1.72]  |
| 199 | (0.00386,0.00875] | (0.00125,0.00292] | (0.46,Inf] | (0.936,1.11]  | (0.213,0.798] |
| 200 | (0.00875,Inf]     | (0.00665,Inf]     | NA         | (0.936,1.11]  | (0.213,0.798] |
| 201 | (0.00179,0.00386] | (0.00665,Inf]     | NA         | (0.936,1.11]  | (1.72,Inf]    |
| 202 | (0.00386,0.00875] | (0.00125,0.00292] | NA         | (0.731,0.936] | (0.213,0.798] |
| 203 | (0.00179,0.00386] | (0.00292,0.00665] | NA         | (0.731,0.936] | (0.798,1.72]  |
| 204 | (0.00179,0.00386] | (0.00292,0.00665] | NA         | (0.731,0.936] | (0.798,1.72]  |
| 205 | (0.00386,0.00875] | (0.00125,0.00292] | NA         | (1.11,Inf]    | (0.213,0.798] |
| 206 | (0.00179,0.00386] | (0.00292,0.00665] | NA         | (0.936,1.11]  | (0.798,1.72]  |
| 207 | (0.00179,0.00386] | (0.00292,0.00665] | NA         | (1.11,Inf]    | (0.798,1.72]  |
| 208 | (0,0.00179]       | (0.00125,0.00292] | (0.46,Inf] | (0.731,0.936] | (0.798,1.72]  |
| 209 | (0.00179,0.00386] | (0.00125,0.00292] | NA         | (0.731,0.936] | (0.213,0.798] |
| 210 | (0.00386,0.00875] | (0.00292,0.00665] | NA         | (0.731,0.936] | (0.213,0.798] |
| 211 | (0.00875,Inf]     | (0.00665,Inf]     | NA         | (1.11,Inf]    | (0.798,1.72]  |
| 212 | (0,0.00179]       | (0.00125,0.00292] | NA         | (0.936,1.11]  | (0.798,1.72]  |
| 213 | NA                | NA                | NA         | (0.731,0.936] | NA            |
| 214 | (0.00386,0.00875] | (0.00292,0.00665] | NA         | (1.11,Inf]    | (0.798,1.72]  |
| 215 | (0.00179,0.00386] | (0.00125,0.00292] | NA         | (0.731,0.936] | (0.213,0.798] |
| 216 | (0.00386,0.00875] | (0.00292,0.00665] | (0.46,Inf] | (0.731,0.936] | (0.798,1.72]  |
| 217 | (0,0.00179]       | (0,0.00125]       | NA         | (0.936,1.11]  | (0.213,0.798] |
| 218 | (0.00386,0.00875] | (0.00292,0.00665] | (0,0.46]   | (0.936,1.11]  | (0.798,1.72]  |
| 219 | (0.00386,0.00875] | (0.00292,0.00665] | NA         | (0.936,1.11]  | (0.213,0.798] |
| 220 | (0.00179,0.00386] | (0.00125,0.00292] | NA         | (0.936,1.11]  | (0.798,1.72]  |
| 221 | (0.00386,0.00875] | (0.00292,0.00665] | NA         | (1.11,Inf]    | (0.798,1.72]  |
| 222 | (0.00179,0.00386] | (0.00125,0.00292] | (0.46,Inf] | (0.936,1.11]  | (0.213,0.798] |
| 223 | (0,0.00179]       | (0.00125,0.00292] | NA         | (0.936,1.11]  | (0.798,1.72]  |
| 224 | (0,0.00179]       | (0.00125,0.00292] | NA         | (0.936,1.11]  | (0.798,1.72]  |

|     |                   |                   |            |               |               |
|-----|-------------------|-------------------|------------|---------------|---------------|
| 225 | (0.00179,0.00386] | (0,0.00125]       | NA         | (0.936,1.11]  | (0.213,0.798] |
| 226 | (0,0.00179]       | (0.00125,0.00292] | NA         | (0.731,0.936] | (0.798,1.72]  |
| 227 | (0.00179,0.00386] | (0.00665,Inf]     | (0.46,Inf] | (0.936,1.11]  | (1.72,Inf]    |
| 228 | (0.00386,0.00875] | (0.00125,0.00292] | NA         | (0.936,1.11]  | (0.213,0.798] |
| 229 | (0,0.00179]       | (0.00125,0.00292] | NA         | (0.731,0.936] | (0.798,1.72]  |
| 230 | NA                | NA                | NA         | NA            | (0.798,1.72]  |
| 231 | (0.00179,0.00386] | (0,0.00125]       | (0.46,Inf] | (0.731,0.936] | (0.213,0.798] |
| 232 | (0,0.00179]       | (0.00125,0.00292] | NA         | (0.936,1.11]  | (0.798,1.72]  |
| 233 | (0.00179,0.00386] | (0.00125,0.00292] | NA         | (0.731,0.936] | (0.213,0.798] |
| 234 | (0,0.00179]       | (0.00125,0.00292] | NA         | (0.936,1.11]  | (1.72,Inf]    |
| 235 | (0.00179,0.00386] | (0.00292,0.00665] | NA         | (0.731,0.936] | (0.798,1.72]  |
| 236 | (0.00875,Inf]     | (0.00665,Inf]     | NA         | (0.936,1.11]  | (0.213,0.798] |
| 237 | (0.00179,0.00386] | (0.00292,0.00665] | NA         | (0.731,0.936] | (0.798,1.72]  |
| 238 | (0.00386,0.00875] | (0.00125,0.00292] | NA         | (0.936,1.11]  | (0.213,0.798] |
| 239 | (0.00179,0.00386] | (0.00292,0.00665] | NA         | (0.936,1.11]  | (0.798,1.72]  |
| 240 | (0.00386,0.00875] | (0.00125,0.00292] | NA         | (1.11,Inf]    | (0.213,0.798] |
| 241 | (0.00875,Inf]     | (0.00665,Inf]     | NA         | (0.936,1.11]  | (0.213,0.798] |
| 242 | (0,0.00179]       | (0.00125,0.00292] | NA         | (0.731,0.936] | (0.798,1.72]  |
| 243 | (0.00179,0.00386] | (0.00292,0.00665] | NA         | (0.731,0.936] | (0.798,1.72]  |
| 244 | (0.00386,0.00875] | (0.00292,0.00665] | NA         | (0.936,1.11]  | (0.213,0.798] |
| 245 | (0.00179,0.00386] | (0.00125,0.00292] | NA         | (0.731,0.936] | (0.213,0.798] |
| 246 | (0.00179,0.00386] | (0.00125,0.00292] | (0,0.46]   | (0.731,0.936] | (0.213,0.798] |
| 247 | (0.00386,0.00875] | (0.00292,0.00665] | NA         | (0.936,1.11]  | (0.798,1.72]  |
| 248 | (0,0.00179]       | (0,0.00125]       | NA         | (0.936,1.11]  | (0.798,1.72]  |
| 249 | (0.00386,0.00875] | (0.00292,0.00665] | NA         | (0.936,1.11]  | (0.213,0.798] |
| 250 | (0.00179,0.00386] | (0.00292,0.00665] | NA         | (0.936,1.11]  | (0.798,1.72]  |
| 251 | (0.00179,0.00386] | (0.00125,0.00292] | NA         | (0.936,1.11]  | (0.798,1.72]  |
| 252 | (0,0.00179]       | (0,0.00125]       | NA         | (1.11,Inf]    | (0.213,0.798] |
| 253 | (0,0.00179]       | (0,0.00125]       | NA         | (1.11,Inf]    | (0.798,1.72]  |
| 254 | (0.00179,0.00386] | (0.00292,0.00665] | NA         | (0,0.731]     | (1.72,Inf]    |
| 255 | (0.00386,0.00875] | (0,0.00125]       | NA         | (0.936,1.11]  | (0,0.213]     |
| 256 | (0.00386,0.00875] | (0,0.00125]       | NA         | (0.936,1.11]  | (0,0.213]     |
| 257 | (0.00386,0.00875] | (0.00292,0.00665] | (0.46,Inf] | (0.936,1.11]  | (0.798,1.72]  |
| 258 | (0.00386,0.00875] | (0.00292,0.00665] | NA         | (0.936,1.11]  | (0.213,0.798] |
| 259 | (0,0.00179]       | (0.00125,0.00292] | (0,0.46]   | (0.936,1.11]  | (0.798,1.72]  |
| 260 | (0.00179,0.00386] | (0.00292,0.00665] | (0.46,Inf] | (0.731,0.936] | (0.798,1.72]  |
| 261 | (0,0.00179]       | (0,0.00125]       | (0.46,Inf] | (0.731,0.936] | (0.213,0.798] |
| 262 | (0,0.00179]       | (0.00125,0.00292] | NA         | (0.936,1.11]  | (0.798,1.72]  |

|     |                   |                   |            |               |               |
|-----|-------------------|-------------------|------------|---------------|---------------|
| 263 | (0,0.00179]       | (0.00125,0.00292] | (0.46,Inf] | (0.731,0.936] | (0.798,1.72]  |
| 264 | (0.00179,0.00386] | (0.00125,0.00292] | NA         | (0.936,1.11]  | (0.213,0.798] |
| 265 | (0,0.00179]       | (0.00125,0.00292] | NA         | (0.731,0.936] | (0.213,0.798] |
| 266 | (0,0.00179]       | (0.00125,0.00292] | NA         | (0.936,1.11]  | (0.798,1.72]  |
| 267 | (0.00179,0.00386] | (0.00125,0.00292] | NA         | (0,0.731]     | (0.213,0.798] |
| 268 | (0.00386,0.00875] | (0.00292,0.00665] | NA         | (0.936,1.11]  | (0.798,1.72]  |
| 269 | (0.00179,0.00386] | (0.00125,0.00292] | NA         | (0.936,1.11]  | (0.213,0.798] |
| 270 | (0,0.00179]       | (0.00125,0.00292] | NA         | (0.936,1.11]  | (0.798,1.72]  |
| 271 | (0.00875,Inf]     | (0.00665,Inf]     | NA         | (1.11,Inf]    | (0.798,1.72]  |
| 272 | (0.00386,0.00875] | (0.00125,0.00292] | NA         | (1.11,Inf]    | (0.213,0.798] |
| 273 | (0.00386,0.00875] | (0.00125,0.00292] | NA         | (0.936,1.11]  | (0,0.213]     |
| 274 | (0.00386,0.00875] | (0.00665,Inf]     | (0,0.46]   | (0.731,0.936] | (0.798,1.72]  |
| 275 | (0.00179,0.00386] | (0.00125,0.00292] | NA         | (0.731,0.936] | (0.213,0.798] |
| 276 | (0.00386,0.00875] | (0.00292,0.00665] | NA         | (0.936,1.11]  | (0.798,1.72]  |
| 277 | (0,0.00179]       | (0.00125,0.00292] | NA         | (0.731,0.936] | (0.798,1.72]  |
| 278 | (0.00179,0.00386] | (0,0.00125]       | NA         | (0.936,1.11]  | (0.213,0.798] |
| 279 | (0,0.00179]       | (0.00125,0.00292] | NA         | (0.731,0.936] | (0.798,1.72]  |
| 280 | (0,0.00179]       | (0.00125,0.00292] | NA         | (0.731,0.936] | (0.798,1.72]  |
| 281 | (0.00386,0.00875] | (0.00292,0.00665] | (0,0.46]   | (0.936,1.11]  | (0.213,0.798] |
| 282 | (0.00179,0.00386] | (0.00292,0.00665] | NA         | (0.936,1.11]  | (0.798,1.72]  |
| 283 | (0.00179,0.00386] | (0.00292,0.00665] | NA         | (0.731,0.936] | (0.798,1.72]  |
| 284 | (0.00179,0.00386] | (0.00125,0.00292] | NA         | (0.731,0.936] | (0.213,0.798] |
| 285 | (0.00386,0.00875] | (0.00292,0.00665] | NA         | (0.936,1.11]  | (0.213,0.798] |
| 286 | (0,0.00179]       | NA                | (0.46,Inf] | (0,0.731]     | NA            |
| 287 | (0,0.00179]       | (0.00125,0.00292] | NA         | (0.731,0.936] | (0.798,1.72]  |
| 288 | (0.00179,0.00386] | (0.00125,0.00292] | NA         | (0.731,0.936] | (0.213,0.798] |
| 289 | (0.00386,0.00875] | (0.00292,0.00665] | NA         | (1.11,Inf]    | (0.798,1.72]  |
| 290 | (0.00386,0.00875] | (0.00125,0.00292] | NA         | (0.936,1.11]  | (0.213,0.798] |
| 291 | (0.00875,Inf]     | (0.00292,0.00665] | (0,0.46]   | (1.11,Inf]    | (0.213,0.798] |
| 292 | (0.00179,0.00386] | (0.00125,0.00292] | NA         | (0.936,1.11]  | (0.798,1.72]  |
| 293 | (0.00179,0.00386] | (0.00125,0.00292] | NA         | (0.731,0.936] | (0.213,0.798] |
| 294 | (0.00179,0.00386] | (0.00125,0.00292] | NA         | (1.11,Inf]    | (0.798,1.72]  |
| 295 | (0.00875,Inf]     | (0.00665,Inf]     | (0.46,Inf] | (1.11,Inf]    | (0.798,1.72]  |
| 296 | (0.00386,0.00875] | (0.00125,0.00292] | NA         | (0.731,0.936] | (0.213,0.798] |
| 297 | (0,0.00179]       | (0.00125,0.00292] | NA         | (0.936,1.11]  | (0.798,1.72]  |
| 298 | (0.00179,0.00386] | (0.00125,0.00292] | NA         | (0.936,1.11]  | (0.213,0.798] |
| 299 | (0.00875,Inf]     | (0.00292,0.00665] | NA         | (0.936,1.11]  | (0.213,0.798] |
| 300 | (0.00386,0.00875] | (0.00125,0.00292] | NA         | (0.731,0.936] | (0.213,0.798] |



|     |                   |                   |            |               |               |
|-----|-------------------|-------------------|------------|---------------|---------------|
| 301 | (0,0.00179]       | (0.00125,0.00292] | NA         | (0.731,0.936] | (0.798,1.72]  |
| 302 | (0,0.00179]       | (0.00125,0.00292] | NA         | (0.731,0.936] | (0.798,1.72]  |
| 303 | (0.00179,0.00386] | (0.00292,0.00665] | NA         | (0.731,0.936] | (0.798,1.72]  |
| 304 | (0.00179,0.00386] | (0.00125,0.00292] | NA         | (0.731,0.936] | (0.213,0.798] |
| 305 | (0.00875,Inf]     | (0.00125,0.00292] | (0.46,Inf] | (0.936,1.11]  | (0,0.213]     |
| 306 | (0.00179,0.00386] | (0.00125,0.00292] | NA         | (0.731,0.936] | (0.798,1.72]  |
| 307 | (0.00179,0.00386] | (0,0.00125]       | NA         | (0.936,1.11]  | (0,0.213]     |
| 308 | (0.00179,0.00386] | (0.00125,0.00292] | NA         | (1.11,Inf]    | (0.798,1.72]  |
| 309 | (0.00179,0.00386] | (0.00125,0.00292] | NA         | (0.936,1.11]  | (0.213,0.798] |
| 310 | (0.00179,0.00386] | (0.00125,0.00292] | NA         | (1.11,Inf]    | (0.798,1.72]  |
| 311 | (0.00179,0.00386] | (0,0.00125]       | NA         | (0.936,1.11]  | (0.213,0.798] |
| 312 | (0.00179,0.00386] | (0.00125,0.00292] | NA         | (0.731,0.936] | (0.213,0.798] |
| 313 | (0,0.00179]       | (0,0.00125]       | NA         | (0.936,1.11]  | (0.213,0.798] |
| 314 | (0.00179,0.00386] | (0.00292,0.00665] | NA         | (0.731,0.936] | (0.798,1.72]  |
| 315 | (0.00179,0.00386] | (0,0.00125]       | NA         | (1.11,Inf]    | (0.213,0.798] |
| 316 | (0,0.00179]       | (0,0.00125]       | NA         | (0.936,1.11]  | (0.798,1.72]  |
| 317 | (0.00179,0.00386] | (0.00125,0.00292] | NA         | (0.936,1.11]  | (0.213,0.798] |
| 318 | (0,0.00179]       | (0.00125,0.00292] | NA         | (0.731,0.936] | (1.72,Inf]    |
| 319 | (0.00179,0.00386] | (0.00292,0.00665] | NA         | (0.936,1.11]  | (0.798,1.72]  |
| 320 | (0,0.00179]       | (0,0.00125]       | NA         | (0.936,1.11]  | (0.798,1.72]  |
| 321 | (0.00179,0.00386] | (0.00125,0.00292] | NA         | (0.936,1.11]  | (0.213,0.798] |
| 322 | (0,0.00179]       | (0.00125,0.00292] | NA         | (0.731,0.936] | (0.798,1.72]  |
| 323 | (0.00179,0.00386] | (0.00292,0.00665] | NA         | (0.731,0.936] | (1.72,Inf]    |
| 324 | (0.00386,0.00875] | (0.00292,0.00665] | (0.46,Inf] | (0.936,1.11]  | (0.798,1.72]  |
| 325 | (0.00179,0.00386] | (0.00292,0.00665] | NA         | (0.936,1.11]  | (0.798,1.72]  |
| 326 | (0.00386,0.00875] | (0.00292,0.00665] | NA         | (0.936,1.11]  | (0.213,0.798] |
| 327 | (0.00179,0.00386] | (0,0.00125]       | (0.46,Inf] | (1.11,Inf]    | (0.213,0.798] |
| 328 | (0.00386,0.00875] | (0.00125,0.00292] | NA         | (0.936,1.11]  | (0.213,0.798] |
| 329 | (0.00386,0.00875] | (0.00292,0.00665] | NA         | (1.11,Inf]    | (0.798,1.72]  |
| 330 | (0.00386,0.00875] | (0.00292,0.00665] | NA         | (0.936,1.11]  | (0.213,0.798] |
| 331 | (0.00179,0.00386] | (0.00125,0.00292] | NA         | (0.731,0.936] | (0.798,1.72]  |
| 332 | (0.00179,0.00386] | (0.00125,0.00292] | NA         | (0.731,0.936] | (0.798,1.72]  |
| 333 | (0.00386,0.00875] | (0.00125,0.00292] | (0.46,Inf] | (0.731,0.936] | (0.213,0.798] |
| 334 | (0.00179,0.00386] | (0.00125,0.00292] | NA         | (0.936,1.11]  | (0.798,1.72]  |
| 335 | (0.00179,0.00386] | (0.00125,0.00292] | (0,0.46]   | (0.731,0.936] | (0.798,1.72]  |
| 336 | (0.00386,0.00875] | (0.00665,Inf]     | NA         | (0.936,1.11]  | (0.798,1.72]  |
| 337 | (0.00179,0.00386] | (0.00125,0.00292] | NA         | (0.731,0.936] | (0.213,0.798] |
| 338 | (0.00386,0.00875] | (0.00292,0.00665] | (0.46,Inf] | (0.936,1.11]  | (0.798,1.72]  |

|     |                   |                   |            |               |               |
|-----|-------------------|-------------------|------------|---------------|---------------|
| 339 | (0.00386,0.00875] | (0.00292,0.00665] | NA         | (0.731,0.936] | (0.213,0.798] |
| 340 | (0,0.00179]       | (0.00125,0.00292] | NA         | (0.731,0.936] | (0.798,1.72]  |
| 341 | (0,0.00179]       | (0.00125,0.00292] | NA         | (0.731,0.936] | (0.798,1.72]  |
| 342 | (0.00179,0.00386] | (0.00125,0.00292] | (0,0.46]   | (0.731,0.936] | (0.798,1.72]  |
| 343 | (0,0.00179]       | (0.00125,0.00292] | NA         | (0.731,0.936] | (0.798,1.72]  |
| 344 | (0.00179,0.00386] | (0.00125,0.00292] | NA         | (0.936,1.11]  | (0.798,1.72]  |
| 345 | (0.00179,0.00386] | (0.00665,Inf]     | NA         | (0.731,0.936] | (1.72,Inf]    |
| 346 | (0.00386,0.00875] | (0.00665,Inf]     | NA         | (0.731,0.936] | (0.798,1.72]  |
| 347 | (0.00179,0.00386] | (0.00125,0.00292] | NA         | (0.936,1.11]  | (0.213,0.798] |
| 348 | (0.00179,0.00386] | (0.00125,0.00292] | NA         | (0.731,0.936] | (0.798,1.72]  |
| 349 | (0.00179,0.00386] | (0.00125,0.00292] | NA         | (0.731,0.936] | (0.798,1.72]  |
| 350 | (0,0.00179]       | (0,0.00125]       | NA         | (0,0.731]     | (0.213,0.798] |
| 351 | (0.00179,0.00386] | (0.00125,0.00292] | NA         | (1.11,Inf]    | (0.798,1.72]  |
| 352 | (0,0.00179]       | (0.00125,0.00292] | NA         | (0.936,1.11]  | (0.798,1.72]  |
| 353 | (0,0.00179]       | (0.00125,0.00292] | NA         | (0.731,0.936] | (0.798,1.72]  |
| 354 | (0.00179,0.00386] | (0.00125,0.00292] | (0,0.46]   | (1.11,Inf]    | (0.798,1.72]  |
| 355 | (0.00179,0.00386] | (0.00292,0.00665] | NA         | (0.936,1.11]  | (0.798,1.72]  |
| 356 | (0.00386,0.00875] | (0.00125,0.00292] | NA         | (1.11,Inf]    | (0.213,0.798] |
| 357 | (0,0.00179]       | (0.00125,0.00292] | NA         | (0.731,0.936] | (0.798,1.72]  |
| 358 | (0.00875,Inf]     | (0.00292,0.00665] | NA         | (0.936,1.11]  | (0.213,0.798] |
| 359 | (0,0.00179]       | (0.00125,0.00292] | NA         | (0.936,1.11]  | (0.798,1.72]  |
| 360 | (0.00386,0.00875] | (0.00125,0.00292] | NA         | (0.936,1.11]  | (0.213,0.798] |
| 361 | (0.00386,0.00875] | (0.00292,0.00665] | NA         | (1.11,Inf]    | (0.798,1.72]  |
| 362 | (0.00386,0.00875] | (0.00292,0.00665] | NA         | (0.936,1.11]  | (0.798,1.72]  |
| 363 | (0,0.00179]       | (0.00125,0.00292] | (0.46,Inf] | (0,0.731]     | (0.798,1.72]  |
| 364 | (0,0.00179]       | (0.00125,0.00292] | (0.46,Inf] | (0,0.731]     | (0.798,1.72]  |
| 365 | (0.00386,0.00875] | (0.00292,0.00665] | (0.46,Inf] | (0.731,0.936] | (0.798,1.72]  |
| 366 | (0.00386,0.00875] | (0.00125,0.00292] | NA         | (1.11,Inf]    | (0.213,0.798] |
| 367 | (0.00386,0.00875] | (0.00125,0.00292] | NA         | (0.936,1.11]  | (0.213,0.798] |
| 368 | (0,0.00179]       | (0.00125,0.00292] | NA         | (0.936,1.11]  | (0.798,1.72]  |
| 369 | (0.00179,0.00386] | (0.00125,0.00292] | NA         | (1.11,Inf]    | (0.798,1.72]  |
| 370 | (0.00179,0.00386] | (0.00125,0.00292] | NA         | (0.731,0.936] | (0.798,1.72]  |
| 371 | (0.00179,0.00386] | (0,0.00125]       | NA         | (0.731,0.936] | (0.213,0.798] |
| 372 | (0,0.00179]       | (0.00125,0.00292] | NA         | (1.11,Inf]    | (1.72,Inf]    |
| 373 | (0.00386,0.00875] | (0.00292,0.00665] | NA         | (1.11,Inf]    | (0.798,1.72]  |
| 374 | (0,0.00179]       | (0.00125,0.00292] | NA         | (0.936,1.11]  | (1.72,Inf]    |
| 375 | (0.00179,0.00386] | (0.00125,0.00292] | (0.46,Inf] | (0.936,1.11]  | (0.798,1.72]  |
| 376 | (0.00179,0.00386] | (0.00292,0.00665] | NA         | (0.936,1.11]  | (0.798,1.72]  |

|     |                   |                   |            |               |               |
|-----|-------------------|-------------------|------------|---------------|---------------|
| 377 | (0.00179,0.00386] | (0.00125,0.00292] | NA         | (0.731,0.936] | (0.798,1.72]  |
| 378 | (0.00386,0.00875] | (0.00292,0.00665] | NA         | (1.11,Inf]    | (0.798,1.72]  |
| 379 | (0.00179,0.00386] | (0.00292,0.00665] | NA         | (1.11,Inf]    | (0.798,1.72]  |
| 380 | (0.00179,0.00386] | (0.00125,0.00292] | NA         | (1.11,Inf]    | (0.798,1.72]  |
| 381 | (0.00179,0.00386] | (0.00125,0.00292] | NA         | (0.936,1.11]  | (0.213,0.798] |
| 382 | (0.00179,0.00386] | (0.00125,0.00292] | NA         | (0.936,1.11]  | (0.798,1.72]  |
| 383 | (0.00386,0.00875] | (0.00665,Inf]     | NA         | (1.11,Inf]    | (0.798,1.72]  |
| 384 | (0.00179,0.00386] | (0.00125,0.00292] | NA         | (0.936,1.11]  | (0.798,1.72]  |
| 385 | (0.00386,0.00875] | (0.00292,0.00665] | (0,0.46]   | (1.11,Inf]    | (0.798,1.72]  |
| 386 | (0.00179,0.00386] | (0.00125,0.00292] | (0.46,Inf] | (0.731,0.936] | (0.798,1.72]  |
| 387 | (0.00386,0.00875] | (0.00665,Inf]     | NA         | (0.936,1.11]  | (0.798,1.72]  |
| 388 | NA                | NA                | NA         | (0.731,0.936] | NA            |
| 389 | (0.00386,0.00875] | (0.00125,0.00292] | NA         | (0.936,1.11]  | (0.213,0.798] |
| 390 | (0,0.00179]       | (0.00292,0.00665] | NA         | (0.731,0.936] | (1.72,Inf]    |
| 391 | NA                | NA                | NA         | (0.731,0.936] | NA            |
| 392 | (0.00179,0.00386] | (0.00125,0.00292] | NA         | (0.731,0.936] | (0.798,1.72]  |
| 393 | (0.00179,0.00386] | (0.00292,0.00665] | NA         | (0.731,0.936] | (0.798,1.72]  |
| 394 | (0.00875,Inf]     | (0.00665,Inf]     | NA         | (1.11,Inf]    | (0.213,0.798] |
| 395 | (0.00179,0.00386] | (0.00125,0.00292] | NA         | (0.731,0.936] | (0.213,0.798] |
| 396 | (0,0.00179]       | (0.00125,0.00292] | NA         | (0.936,1.11]  | (0.798,1.72]  |
| 397 | (0.00179,0.00386] | (0.00125,0.00292] | NA         | (0.936,1.11]  | (0.213,0.798] |
| 398 | (0,0.00179]       | (0,0.00125]       | NA         | (1.11,Inf]    | (0.798,1.72]  |
| 399 | (0.00179,0.00386] | (0.00125,0.00292] | (0.46,Inf] | (0.731,0.936] | (0.213,0.798] |
| 400 | (0.00875,Inf]     | (0.00665,Inf]     | NA         | (0,0.731]     | (0.798,1.72]  |
| 401 | (0,0.00179]       | (0.00125,0.00292] | NA         | (0.936,1.11]  | (0.213,0.798] |
| 402 | (0.00179,0.00386] | (0.00292,0.00665] | NA         | (0.731,0.936] | (0.213,0.798] |
| 403 | (0,0.00179]       | (0,0.00125]       | NA         | (0.731,0.936] | (0.213,0.798] |
| 404 | (0.00179,0.00386] | (0.00292,0.00665] | (0.46,Inf] | (0.936,1.11]  | (0.798,1.72]  |
| 405 | (0.00875,Inf]     | (0.00665,Inf]     | NA         | (0.936,1.11]  | (0.798,1.72]  |
| 406 | NA                | NA                | NA         | (1.11,Inf]    | NA            |
| 407 | (0.00179,0.00386] | (0.00125,0.00292] | NA         | (1.11,Inf]    | (0.213,0.798] |
| 408 | (0.00179,0.00386] | (0.00292,0.00665] | NA         | (0.936,1.11]  | (0.798,1.72]  |
| 409 | (0.00386,0.00875] | (0.00125,0.00292] | (0.46,Inf] | (0.731,0.936] | (0.213,0.798] |
| 410 | (0,0.00179]       | (0.00125,0.00292] | NA         | (0.936,1.11]  | (0.798,1.72]  |
| 411 | (0.00875,Inf]     | (0.00665,Inf]     | NA         | (0.731,0.936] | (0.798,1.72]  |
| 412 | (0.00875,Inf]     | (0.00292,0.00665] | NA         | (1.11,Inf]    | (0.213,0.798] |
| 413 | (0,0.00179]       | (0,0.00125]       | NA         | (0.731,0.936] | (0.213,0.798] |
| 414 | (0.00386,0.00875] | (0.00665,Inf]     | NA         | (0.731,0.936] | (0.798,1.72]  |

|     |                   |                   |            |               |               |
|-----|-------------------|-------------------|------------|---------------|---------------|
| 415 | (0,0.00179]       | (0.00125,0.00292] | NA         | (0.936,1.11]  | (0.798,1.72]  |
| 416 | (0.00179,0.00386] | (0.00292,0.00665] | NA         | (0.936,1.11]  | (0.798,1.72]  |
| 417 | (0.00386,0.00875] | (0.00292,0.00665] | NA         | (0,0.731]     | (0.213,0.798] |
| 418 | (0.00179,0.00386] | (0.00292,0.00665] | (0.46,Inf] | (0.936,1.11]  | (0.798,1.72]  |
| 419 | (0.00179,0.00386] | (0.00292,0.00665] | NA         | (0.731,0.936] | (0.798,1.72]  |
| 420 | (0.00179,0.00386] | (0.00125,0.00292] | NA         | (1.11,Inf]    | (0.798,1.72]  |
| 421 | (0.00179,0.00386] | (0.00125,0.00292] | NA         | (0.731,0.936] | (0.213,0.798] |
| 422 | (0.00179,0.00386] | (0,0.00125]       | NA         | (1.11,Inf]    | (0,0.213]     |
| 423 | (0.00386,0.00875] | (0.00292,0.00665] | NA         | (0.936,1.11]  | (0.798,1.72]  |
| 424 | (0,0.00179]       | (0,0.00125]       | NA         | (0.731,0.936] | (0.213,0.798] |
| 425 | (0.00179,0.00386] | (0.00125,0.00292] | NA         | (1.11,Inf]    | (0.213,0.798] |
| 426 | (0.00386,0.00875] | (0.00292,0.00665] | NA         | (0.936,1.11]  | (0.798,1.72]  |
| 427 | (0.00386,0.00875] | (0.00125,0.00292] | NA         | (0.936,1.11]  | (0.213,0.798] |
| 428 | (0.00386,0.00875] | (0.00292,0.00665] | NA         | (1.11,Inf]    | (0.798,1.72]  |
| 429 | (0.00386,0.00875] | (0.00292,0.00665] | NA         | (1.11,Inf]    | (0.798,1.72]  |
| 430 | (0.00875,Inf]     | (0.00292,0.00665] | (0,0.46]   | (0.731,0.936] | (0.213,0.798] |
| 431 | (0.00386,0.00875] | (0.00125,0.00292] | NA         | (0.731,0.936] | (0.213,0.798] |
| 432 | (0.00386,0.00875] | (0.00292,0.00665] | NA         | (0.731,0.936] | (0.213,0.798] |
| 433 | (0,0.00179]       | (0,0.00125]       | NA         | (0.731,0.936] | (0.798,1.72]  |
| 434 | (0.00179,0.00386] | (0.00125,0.00292] | (0.46,Inf] | (0.731,0.936] | (0.213,0.798] |
| 435 | (0.00875,Inf]     | (0.00665,Inf]     | (0.46,Inf] | (1.11,Inf]    | (0.213,0.798] |
| 436 | (0.00386,0.00875] | (0.00292,0.00665] | (0.46,Inf] | (0.731,0.936] | (0.798,1.72]  |
| 437 | (0.00386,0.00875] | (0.00292,0.00665] | NA         | (0.936,1.11]  | (0.213,0.798] |
| 438 | (0.00179,0.00386] | (0.00125,0.00292] | NA         | (0.936,1.11]  | (0.213,0.798] |
| 439 | (0.00386,0.00875] | (0.00292,0.00665] | NA         | (0.731,0.936] | (0.213,0.798] |
| 440 | (0.00386,0.00875] | (0,0.00125]       | NA         | (1.11,Inf]    | (0.798,1.72]  |
| 441 | (0.00179,0.00386] | (0,0.00125]       | NA         | (0,0.731]     | (0,0.213]     |
| 442 | (0.00386,0.00875] | (0.00125,0.00292] | NA         | (1.11,Inf]    | (0.213,0.798] |
| 443 | (0.00386,0.00875] | (0.00125,0.00292] | NA         | (1.11,Inf]    | (0.213,0.798] |
| 444 | (0.00386,0.00875] | (0.00292,0.00665] | NA         | (0.731,0.936] | (0.798,1.72]  |
| 445 | (0.00386,0.00875] | (0.00125,0.00292] | NA         | (0.731,0.936] | (0.213,0.798] |
| 446 | (0.00179,0.00386] | (0.00292,0.00665] | (0,0.46]   | (0.936,1.11]  | (0.798,1.72]  |
| 447 | (0.00179,0.00386] | (0.00125,0.00292] | NA         | (0.731,0.936] | (0.213,0.798] |
| 448 | (0.00386,0.00875] | (0.00292,0.00665] | NA         | (1.11,Inf]    | (0.213,0.798] |
| 449 | (0.00386,0.00875] | (0.00125,0.00292] | NA         | (0.936,1.11]  | (0.213,0.798] |
| 450 | (0.00386,0.00875] | (0.00125,0.00292] | NA         | (0.936,1.11]  | (0.213,0.798] |
| 451 | (0,0.00179]       | (0,0.00125]       | (0.46,Inf] | (0.731,0.936] | (0.213,0.798] |
| 452 | (0,0.00179]       | (0,0.00125]       | (0.46,Inf] | (0.731,0.936] | (0.213,0.798] |

|     |                   |                   |            |               |               |
|-----|-------------------|-------------------|------------|---------------|---------------|
| 453 | (0.00179,0.00386] | (0.00292,0.00665] | NA         | (0.731,0.936] | (0.798,1.72]  |
| 454 | (0,0.00179]       | (0.00125,0.00292] | NA         | (0.936,1.11]  | (0.798,1.72]  |
| 455 | (0.00179,0.00386] | (0.00125,0.00292] | NA         | (0.731,0.936] | (0.213,0.798] |
| 456 | (0.00179,0.00386] | (0.00125,0.00292] | NA         | (0.731,0.936] | (0.213,0.798] |
| 457 | (0.00179,0.00386] | (0.00125,0.00292] | NA         | (0.731,0.936] | (0.213,0.798] |
| 458 | (0,0.00179]       | (0.00125,0.00292] | NA         | (0.936,1.11]  | (1.72,Inf]    |
| 459 | (0.00179,0.00386] | (0.00125,0.00292] | NA         | (0.731,0.936] | (0.213,0.798] |
| 460 | (0,0.00179]       | NA                | (0.46,Inf] | (0.731,0.936] | NA            |
| 461 | (0,0.00179]       | (0,0.00125]       | NA         | (0.936,1.11]  | (0.213,0.798] |
| 462 | (0.00179,0.00386] | (0,0.00125]       | NA         | (0.731,0.936] | (0.213,0.798] |
| 463 | (0.00386,0.00875] | (0.00125,0.00292] | NA         | (1.11,Inf]    | (0.213,0.798] |
| 464 | (0,0.00179]       | (0.00125,0.00292] | (0.46,Inf] | (0,0.731]     | (0.213,0.798] |
| 465 | (0,0.00179]       | (0.00125,0.00292] | (0.46,Inf] | (0,0.731]     | (0.213,0.798] |
| 466 | (0.00386,0.00875] | (0.00125,0.00292] | NA         | (0.936,1.11]  | (0.213,0.798] |
| 467 | (0.00179,0.00386] | (0.00292,0.00665] | NA         | (0,0.731]     | (0.798,1.72]  |
| 468 | (0,0.00179]       | (0.00125,0.00292] | (0.46,Inf] | (0,0.731]     | (0.798,1.72]  |
| 469 | (0.00179,0.00386] | (0.00292,0.00665] | NA         | (0.936,1.11]  | (1.72,Inf]    |
| 470 | (0.00386,0.00875] | (0.00665,Inf]     | NA         | (0,0.731]     | (0.798,1.72]  |
| 471 | (0,0.00179]       | (0.00125,0.00292] | NA         | (0,0.731]     | (0.798,1.72]  |
| 472 | (0,0.00179]       | (0,0.00125]       | NA         | (0.731,0.936] | (0.213,0.798] |
| 473 | (0.00179,0.00386] | (0.00125,0.00292] | NA         | (0.731,0.936] | (0.798,1.72]  |
| 474 | (0.00179,0.00386] | (0.00292,0.00665] | NA         | (0.731,0.936] | (0.798,1.72]  |
| 475 | (0.00386,0.00875] | (0.00292,0.00665] | NA         | (0.936,1.11]  | (0.798,1.72]  |
| 476 | (0.00386,0.00875] | (0.00292,0.00665] | NA         | (1.11,Inf]    | (0.213,0.798] |
| 477 | (0.00179,0.00386] | (0.00125,0.00292] | NA         | (0.936,1.11]  | (0.213,0.798] |
| 478 | (0.00179,0.00386] | (0.00125,0.00292] | NA         | (0.936,1.11]  | (0.213,0.798] |
| 479 | (0.00179,0.00386] | (0,0.00125]       | NA         | (0.731,0.936] | (0,0.213]     |
| 480 | (0.00386,0.00875] | (0.00125,0.00292] | NA         | (0.731,0.936] | (0.213,0.798] |
| 481 | (0.00386,0.00875] | (0.00125,0.00292] | NA         | (0.936,1.11]  | (0.213,0.798] |
| 482 | (0.00386,0.00875] | (0.00292,0.00665] | NA         | (0.936,1.11]  | (0.798,1.72]  |
| 483 | (0.00386,0.00875] | (0.00125,0.00292] | NA         | (1.11,Inf]    | (0.213,0.798] |
| 484 | (0.00386,0.00875] | (0.00665,Inf]     | (0,0.46]   | (1.11,Inf]    | (1.72,Inf]    |
| 485 | (0,0.00179]       | (0,0.00125]       | NA         | (0.731,0.936] | (0.213,0.798] |
| 486 | (0.00386,0.00875] | (0.00665,Inf]     | NA         | (0.936,1.11]  | (0.798,1.72]  |
| 487 | (0.00179,0.00386] | (0,0.00125]       | NA         | (0.936,1.11]  | (0.213,0.798] |
| 488 | (0.00386,0.00875] | (0.00292,0.00665] | NA         | (0.731,0.936] | (0.798,1.72]  |
| 489 | (0.00386,0.00875] | (0.00292,0.00665] | (0.46,Inf] | (0.936,1.11]  | (0.213,0.798] |
| 490 | (0.00179,0.00386] | (0.00125,0.00292] | NA         | (0.731,0.936] | (0.213,0.798] |

|     |                   |                   |            |               |               |
|-----|-------------------|-------------------|------------|---------------|---------------|
| 491 | (0.00179,0.00386] | (0.00292,0.00665] | NA         | (0.936,1.11]  | (0.798,1.72]  |
| 492 | (0.00386,0.00875] | (0.00292,0.00665] | NA         | (0.936,1.11]  | (0.213,0.798] |
| 493 | (0,0.00179]       | (0,0.00125]       | NA         | (0.936,1.11]  | (0.798,1.72]  |
| 494 | (0.00386,0.00875] | (0.00292,0.00665] | (0.46,Inf] | (0.936,1.11]  | (0.798,1.72]  |
| 495 | (0.00179,0.00386] | (0.00125,0.00292] | (0.46,Inf] | (0.936,1.11]  | (0.213,0.798] |
| 496 | (0,0.00179]       | (0.00125,0.00292] | NA         | (0.731,0.936] | (0.798,1.72]  |
| 497 | (0.00386,0.00875] | (0.00292,0.00665] | NA         | (0.731,0.936] | (0.213,0.798] |
| 498 | (0.00179,0.00386] | (0.00292,0.00665] | NA         | (0.731,0.936] | (0.798,1.72]  |
| 499 | (0.00875,Inf]     | (0.00292,0.00665] | NA         | (1.11,Inf]    | (0.213,0.798] |
| 500 | (0.00179,0.00386] | (0.00125,0.00292] | NA         | (1.11,Inf]    | (0.213,0.798] |
| 501 | (0.00179,0.00386] | (0.00125,0.00292] | NA         | (0.936,1.11]  | (0.798,1.72]  |
| 502 | (0.00179,0.00386] | (0.00125,0.00292] | NA         | (0.936,1.11]  | (0.213,0.798] |
| 503 | (0.00179,0.00386] | (0.00292,0.00665] | NA         | (0.731,0.936] | (0.213,0.798] |
| 504 | (0.00179,0.00386] | (0.00292,0.00665] | NA         | (0,0.731]     | (0.213,0.798] |
| 505 | (0.00386,0.00875] | (0.00292,0.00665] | NA         | (0.936,1.11]  | (0.798,1.72]  |
| 506 | (0.00179,0.00386] | (0.00125,0.00292] | NA         | (0.731,0.936] | (0.213,0.798] |
| 507 | (0.00875,Inf]     | (0.00665,Inf]     | NA         | (0,0.731]     | (0.213,0.798] |
| 508 | (0.00179,0.00386] | (0.00292,0.00665] | NA         | (0.731,0.936] | (0.798,1.72]  |
| 509 | (0.00386,0.00875] | (0.00665,Inf]     | NA         | (1.11,Inf]    | (1.72,Inf]    |
| 510 | (0.00179,0.00386] | (0.00125,0.00292] | NA         | (0.731,0.936] | (0.213,0.798] |
| 511 | (0,0.00179]       | (0.00125,0.00292] | NA         | (0,0.731]     | (0.798,1.72]  |
| 512 | (0.00179,0.00386] | (0.00292,0.00665] | NA         | (1.11,Inf]    | (1.72,Inf]    |
| 513 | (0.00179,0.00386] | (0.00292,0.00665] | NA         | (0.731,0.936] | (0.798,1.72]  |
| 514 | (0.00875,Inf]     | (0.00665,Inf]     | NA         | (1.11,Inf]    | (0.798,1.72]  |
| 515 | (0,0.00179]       | (0.00125,0.00292] | NA         | (0.936,1.11]  | (0.798,1.72]  |
| 516 | (0.00386,0.00875] | (0.00125,0.00292] | NA         | (0.936,1.11]  | (0.213,0.798] |
| 517 | (0.00875,Inf]     | (0.00665,Inf]     | NA         | (0.936,1.11]  | (0.798,1.72]  |
| 518 | (0.00179,0.00386] | (0.00292,0.00665] | NA         | (0.936,1.11]  | (0.798,1.72]  |
| 519 | (0,0.00179]       | NA                | NA         | (1.11,Inf]    | NA            |
| 520 | (0.00179,0.00386] | (0,0.00125]       | NA         | (1.11,Inf]    | (0.213,0.798] |
| 521 | (0.00179,0.00386] | (0.00292,0.00665] | NA         | (0.731,0.936] | (0.798,1.72]  |
| 522 | (0.00386,0.00875] | (0.00125,0.00292] | NA         | (0.936,1.11]  | (0.213,0.798] |
| 523 | (0.00179,0.00386] | (0.00125,0.00292] | (0,0.46]   | (0.731,0.936] | (0.213,0.798] |
| 524 | (0,0.00179]       | (0.00125,0.00292] | NA         | (0.936,1.11]  | (1.72,Inf]    |
| 525 | (0.00179,0.00386] | (0.00125,0.00292] | NA         | (0.731,0.936] | (0.798,1.72]  |
| 526 | (0.00386,0.00875] | (0.00665,Inf]     | (0,0.46]   | (0.936,1.11]  | (0.798,1.72]  |
| 527 | (0.00179,0.00386] | (0.00665,Inf]     | NA         | (0.731,0.936] | (1.72,Inf]    |
| 528 | (0.00179,0.00386] | (0.00125,0.00292] | NA         | (0.731,0.936] | (0.213,0.798] |

|     |                   |                   |            |               |               |
|-----|-------------------|-------------------|------------|---------------|---------------|
| 529 | (0.00875,Inf]     | (0.00665,Inf]     | NA         | (0.731,0.936] | (0.798,1.72]  |
| 530 | (0.00386,0.00875] | (0.00292,0.00665] | NA         | (0.731,0.936] | (0.213,0.798] |
| 531 | (0.00386,0.00875] | (0.00292,0.00665] | NA         | (1.11,Inf]    | (0.798,1.72]  |
| 532 | (0,0.00179]       | (0.00125,0.00292] | NA         | (0.731,0.936] | (0.213,0.798] |
| 533 | (0.00386,0.00875] | (0.00292,0.00665] | NA         | (0.936,1.11]  | (0.213,0.798] |
| 534 | (0.00179,0.00386] | (0.00125,0.00292] | NA         | (0.936,1.11]  | (0.798,1.72]  |
| 535 | (0.00179,0.00386] | (0.00125,0.00292] | (0.46,Inf] | (1.11,Inf]    | (0.798,1.72]  |
| 536 | (0.00386,0.00875] | (0.00125,0.00292] | NA         | (0.936,1.11]  | (0.213,0.798] |
| 537 | (0,0.00179]       | (0,0.00125]       | NA         | (0.936,1.11]  | (0.213,0.798] |
| 538 | (0.00179,0.00386] | (0,0.00125]       | NA         | (0.936,1.11]  | (0,0.213]     |
| 539 | (0.00179,0.00386] | (0.00125,0.00292] | NA         | (0.731,0.936] | (0.213,0.798] |
| 540 | (0.00179,0.00386] | (0.00125,0.00292] | NA         | (0.936,1.11]  | (0.798,1.72]  |
| 541 | NA                | (0,0.00125]       | NA         | (0,0.731]     | (1.72,Inf]    |
| 542 | (0.00179,0.00386] | (0.00125,0.00292] | NA         | (0.731,0.936] | (0.798,1.72]  |
| 543 | (0,0.00179]       | (0.00292,0.00665] | NA         | (0.936,1.11]  | (1.72,Inf]    |
| 544 | (0.00386,0.00875] | (0.00125,0.00292] | NA         | (0.936,1.11]  | (0.213,0.798] |
| 545 | NA                | NA                | NA         | (1.11,Inf]    | NA            |
| 546 | (0.00179,0.00386] | (0,0.00125]       | NA         | (1.11,Inf]    | (0.213,0.798] |
| 547 | (0.00386,0.00875] | (0.00292,0.00665] | NA         | (0.731,0.936] | (0.213,0.798] |
| 548 | (0.00386,0.00875] | (0.00292,0.00665] | NA         | (0.936,1.11]  | (0.213,0.798] |
| 549 | (0.00386,0.00875] | (0.00665,Inf]     | NA         | (0,0.731]     | (0.798,1.72]  |
| 550 | (0.00179,0.00386] | (0.00125,0.00292] | NA         | (1.11,Inf]    | (0.798,1.72]  |
| 551 | (0.00179,0.00386] | (0.00292,0.00665] | NA         | (0.731,0.936] | (0.798,1.72]  |
| 552 | (0.00179,0.00386] | (0,0.00125]       | NA         | (1.11,Inf]    | (0.213,0.798] |
| 553 | (0,0.00179]       | (0.00125,0.00292] | NA         | (0.936,1.11]  | (1.72,Inf]    |
| 554 | (0.00179,0.00386] | (0,0.00125]       | NA         | (0.731,0.936] | (0.213,0.798] |
| 555 | (0,0.00179]       | (0.00125,0.00292] | NA         | (0,0.731]     | (0.798,1.72]  |
| 556 | (0.00179,0.00386] | NA                | NA         | (0,0.731]     | NA            |
| 557 | (0.00179,0.00386] | (0,0.00125]       | NA         | (1.11,Inf]    | (0.213,0.798] |
| 558 | (0.00386,0.00875] | (0.00125,0.00292] | NA         | (0.936,1.11]  | (0.213,0.798] |
| 559 | (0,0.00179]       | (0.00292,0.00665] | NA         | (0.731,0.936] | (1.72,Inf]    |
| 560 | (0.00386,0.00875] | (0.00125,0.00292] | NA         | (0.731,0.936] | (0.213,0.798] |
| 561 | (0.00386,0.00875] | (0.00125,0.00292] | NA         | (0.936,1.11]  | (0.213,0.798] |
| 562 | (0.00386,0.00875] | (0,0.00125]       | NA         | (1.11,Inf]    | (0,0.213]     |
| 563 | (0,0.00179]       | (0,0.00125]       | NA         | (1.11,Inf]    | (0.798,1.72]  |
| 564 | (0.00179,0.00386] | (0,0.00125]       | NA         | (0.731,0.936] | (0.213,0.798] |
| 565 | (0.00179,0.00386] | (0.00292,0.00665] | NA         | (0.936,1.11]  | (1.72,Inf]    |
| 566 | (0.00179,0.00386] | (0,0.00125]       | NA         | (1.11,Inf]    | (0.213,0.798] |

|     |                   |                   |            |               |               |
|-----|-------------------|-------------------|------------|---------------|---------------|
| 567 | (0.00875,Inf]     | (0.00665,Inf]     | NA         | (1.11,Inf]    | (0.798,1.72]  |
| 568 | (0.00875,Inf]     | (0.00292,0.00665] | NA         | (0.936,1.11]  | (0.213,0.798] |
| 569 | (0.00179,0.00386] | (0.00125,0.00292] | NA         | (0.731,0.936] | (0.798,1.72]  |
| 570 | (0.00386,0.00875] | (0.00292,0.00665] | NA         | (0.731,0.936] | (0.213,0.798] |
| 571 | (0,0.00179]       | (0.00125,0.00292] | NA         | (0.731,0.936] | (0.798,1.72]  |
| 572 | (0.00875,Inf]     | (0.00665,Inf]     | NA         | (0.936,1.11]  | (0.213,0.798] |
| 573 | (0.00386,0.00875] | (0.00292,0.00665] | NA         | (1.11,Inf]    | (0.798,1.72]  |
| 574 | (0.00386,0.00875] | (0.00125,0.00292] | NA         | (1.11,Inf]    | (0.213,0.798] |
| 575 | (0.00386,0.00875] | (0.00125,0.00292] | NA         | (1.11,Inf]    | (0.213,0.798] |
| 576 | (0.00179,0.00386] | (0.00292,0.00665] | NA         | (1.11,Inf]    | (1.72,Inf]    |
| 577 | (0.00179,0.00386] | (0.00125,0.00292] | NA         | (0.936,1.11]  | (0.798,1.72]  |
| 578 | (0.00386,0.00875] | (0.00292,0.00665] | NA         | (0.936,1.11]  | (0.798,1.72]  |
| 579 | (0.00179,0.00386] | (0.00125,0.00292] | NA         | (0.936,1.11]  | (0.213,0.798] |
| 580 | (0.00386,0.00875] | (0.00292,0.00665] | NA         | (0.936,1.11]  | (0.798,1.72]  |
| 581 | (0.00179,0.00386] | (0.00292,0.00665] | NA         | (0.936,1.11]  | (0.798,1.72]  |
| 582 | (0.00179,0.00386] | (0.00125,0.00292] | NA         | (1.11,Inf]    | (0.798,1.72]  |
| 583 | (0.00875,Inf]     | (0.00665,Inf]     | (0,0.46]   | (1.11,Inf]    | (0.798,1.72]  |
| 584 | (0.00179,0.00386] | (0.00292,0.00665] | NA         | (0,0.731]     | (0.213,0.798] |
| 585 | (0.00179,0.00386] | (0.00292,0.00665] | NA         | (0,0.731]     | (0.213,0.798] |
| 586 | (0.00179,0.00386] | (0.00125,0.00292] | NA         | (0.936,1.11]  | (0.213,0.798] |
| 587 | (0,0.00179]       | (0.00125,0.00292] | NA         | (0.731,0.936] | (0.798,1.72]  |
| 588 | (0,0.00179]       | (0,0.00125]       | NA         | (0.731,0.936] | (0.798,1.72]  |
| 589 | (0.00179,0.00386] | (0.00125,0.00292] | NA         | (0.936,1.11]  | (0.798,1.72]  |
| 590 | (0,0.00179]       | (0,0.00125]       | NA         | (0.731,0.936] | (0.213,0.798] |
| 591 | (0,0.00179]       | (0.00125,0.00292] | NA         | (0.731,0.936] | (1.72,Inf]    |
| 592 | (0.00179,0.00386] | (0.00292,0.00665] | NA         | (0.936,1.11]  | (0.798,1.72]  |
| 593 | (0,0.00179]       | (0.00292,0.00665] | NA         | (0.731,0.936] | (1.72,Inf]    |
| 594 | (0.00179,0.00386] | (0.00125,0.00292] | NA         | (0.731,0.936] | (0.213,0.798] |
| 595 | (0.00386,0.00875] | (0.00125,0.00292] | NA         | (1.11,Inf]    | (0.213,0.798] |
| 596 | (0.00386,0.00875] | NA                | NA         | (1.11,Inf]    | NA            |
| 597 | (0.00179,0.00386] | (0,0.00125]       | NA         | (0.936,1.11]  | (0.213,0.798] |
| 598 | (0.00386,0.00875] | (0.00292,0.00665] | (0.46,Inf] | (1.11,Inf]    | (0.213,0.798] |
| 599 | (0.00179,0.00386] | (0.00292,0.00665] | NA         | (0.731,0.936] | (1.72,Inf]    |
| 600 | (0.00179,0.00386] | (0,0.00125]       | NA         | (0.731,0.936] | (0,0.213]     |
| 601 | (0.00386,0.00875] | (0.00292,0.00665] | NA         | (0,0.731]     | (0.213,0.798] |
| 602 | (0.00875,Inf]     | (0.00125,0.00292] | NA         | (1.11,Inf]    | (0.213,0.798] |
| 603 | (0.00179,0.00386] | (0.00665,Inf]     | NA         | (0.731,0.936] | (0.798,1.72]  |
| 604 | (0.00179,0.00386] | (0.00292,0.00665] | NA         | (1.11,Inf]    | (1.72,Inf]    |



|     |                   |                   |            |               |               |
|-----|-------------------|-------------------|------------|---------------|---------------|
| 605 | (0.00179,0.00386] | (0,0.00125]       | (0.46,Inf] | (0.731,0.936] | (0,0.213]     |
| 606 | (0.00179,0.00386] | (0.00292,0.00665] | NA         | (0,0.731]     | (1.72,Inf]    |
| 607 | (0.00875,Inf]     | (0.00665,Inf]     | NA         | (0.731,0.936] | (0.213,0.798] |
| 608 | (0.00386,0.00875] | (0.00125,0.00292] | NA         | (0.731,0.936] | (0.213,0.798] |
| 609 | (0.00386,0.00875] | (0.00125,0.00292] | NA         | (0.936,1.11]  | (0.213,0.798] |
| 610 | (0,0.00179]       | (0.00125,0.00292] | NA         | (0.936,1.11]  | (0.798,1.72]  |
| 611 | (0.00179,0.00386] | (0.00125,0.00292] | NA         | (1.11,Inf]    | (0.798,1.72]  |
| 612 | NA                | NA                | NA         | (0.936,1.11]  | NA            |
| 613 | (0.00179,0.00386] | (0.00292,0.00665] | NA         | (0.936,1.11]  | (0.798,1.72]  |
| 614 | (0.00179,0.00386] | (0.00125,0.00292] | NA         | (0,0.731]     | (0.213,0.798] |
| 615 | (0.00179,0.00386] | (0.00125,0.00292] | NA         | (0,0.731]     | (0.213,0.798] |
| 616 | (0.00179,0.00386] | (0.00292,0.00665] | NA         | (1.11,Inf]    | (0.798,1.72]  |
| 617 | (0.00179,0.00386] | (0.00125,0.00292] | NA         | (0.731,0.936] | (0.213,0.798] |
| 618 | (0.00179,0.00386] | (0.00665,Inf]     | (0,0.46]   | (1.11,Inf]    | (1.72,Inf]    |
| 619 | (0.00386,0.00875] | (0.00292,0.00665] | NA         | (0.936,1.11]  | (0.213,0.798] |
| 620 | (0.00179,0.00386] | (0.00292,0.00665] | NA         | (0.731,0.936] | (0.213,0.798] |
| 621 | (0.00179,0.00386] | (0,0.00125]       | NA         | (0.731,0.936] | (0.213,0.798] |
| 622 | (0,0.00179]       | (0.00125,0.00292] | NA         | (0,0.731]     | (0.798,1.72]  |
| 623 | (0.00386,0.00875] | (0.00292,0.00665] | NA         | (0.936,1.11]  | (0.213,0.798] |
| 624 | (0,0.00179]       | (0.00125,0.00292] | NA         | (1.11,Inf]    | (1.72,Inf]    |
| 625 | (0,0.00179]       | (0,0.00125]       | NA         | (0.731,0.936] | (0.213,0.798] |
| 626 | (0.00179,0.00386] | (0.00292,0.00665] | NA         | (0.936,1.11]  | (1.72,Inf]    |
| 627 | (0.00875,Inf]     | (0.00292,0.00665] | NA         | (1.11,Inf]    | (0.798,1.72]  |
| 628 | (0.00875,Inf]     | (0,0.00125]       | NA         | (1.11,Inf]    | (0,0.213]     |
| 629 | (0.00386,0.00875] | (0.00665,Inf]     | (0.46,Inf] | (0.731,0.936] | (0.798,1.72]  |
| 630 | (0.00179,0.00386] | (0.00665,Inf]     | NA         | (0.731,0.936] | (1.72,Inf]    |
| 631 | (0.00179,0.00386] | (0.00125,0.00292] | NA         | (0.731,0.936] | (0.213,0.798] |
| 632 | (0.00179,0.00386] | (0.00292,0.00665] | NA         | (0.936,1.11]  | (0.798,1.72]  |
| 633 | (0,0.00179]       | (0,0.00125]       | NA         | (0.731,0.936] | (0.213,0.798] |
| 634 | (0.00179,0.00386] | (0.00125,0.00292] | NA         | (0,0.731]     | (0.798,1.72]  |
| 635 | (0.00179,0.00386] | (0.00125,0.00292] | NA         | (0.936,1.11]  | (0.798,1.72]  |
| 636 | (0.00179,0.00386] | (0.00125,0.00292] | NA         | (0,0.731]     | (0.798,1.72]  |
| 637 | (0,0.00179]       | (0.00125,0.00292] | NA         | (1.11,Inf]    | (1.72,Inf]    |
| 638 | (0,0.00179]       | (0.00125,0.00292] | NA         | (0.731,0.936] | (1.72,Inf]    |
| 639 | (0.00386,0.00875] | (0.00292,0.00665] | NA         | (0.731,0.936] | (0.798,1.72]  |
| 640 | (0,0.00179]       | (0.00125,0.00292] | NA         | (0.731,0.936] | (0.798,1.72]  |
| 641 | (0.00386,0.00875] | (0.00125,0.00292] | NA         | (1.11,Inf]    | (0.213,0.798] |
| 642 | (0.00386,0.00875] | (0.00125,0.00292] | NA         | (0.731,0.936] | (0.213,0.798] |

|     |                   |                   |            |               |               |
|-----|-------------------|-------------------|------------|---------------|---------------|
| 643 | (0.00386,0.00875] | (0.00292,0.00665] | NA         | (0.731,0.936] | (0.798,1.72]  |
| 644 | (0.00386,0.00875] | (0.00292,0.00665] | NA         | (0,0.731]     | (0.213,0.798] |
| 645 | (0.00179,0.00386] | (0.00125,0.00292] | NA         | (0,0.731]     | (0.213,0.798] |
| 646 | (0.00386,0.00875] | (0.00665,Inf]     | NA         | (0.731,0.936] | (0.798,1.72]  |
| 647 | (0.00179,0.00386] | (0.00125,0.00292] | NA         | (0.731,0.936] | (0.213,0.798] |
| 648 | (0,0.00179]       | (0.00292,0.00665] | NA         | (0.731,0.936] | (0.798,1.72]  |
| 649 | (0.00179,0.00386] | (0.00292,0.00665] | NA         | (0.936,1.11]  | (0.798,1.72]  |
| 650 | NA                | NA                | NA         | (1.11,Inf]    | NA            |
| 651 | (0.00386,0.00875] | (0.00292,0.00665] | NA         | (0.936,1.11]  | (0.798,1.72]  |
| 652 | (0.00179,0.00386] | (0.00125,0.00292] | NA         | (0.936,1.11]  | (0.213,0.798] |
| 653 | (0.00386,0.00875] | (0.00665,Inf]     | NA         | (0.936,1.11]  | (0.798,1.72]  |
| 654 | (0.00179,0.00386] | (0.00125,0.00292] | NA         | (0.936,1.11]  | (0.798,1.72]  |
| 655 | (0.00875,Inf]     | (0.00665,Inf]     | NA         | (0.936,1.11]  | (1.72,Inf]    |
| 656 | (0.00386,0.00875] | (0,0.00125]       | NA         | (0.731,0.936] | (0,0.213]     |
| 657 | (0.00386,0.00875] | (0.00125,0.00292] | NA         | (0.936,1.11]  | (0.213,0.798] |
| 658 | (0.00386,0.00875] | (0.00292,0.00665] | (0.46,Inf] | (0.936,1.11]  | (0.213,0.798] |
| 659 | (0.00386,0.00875] | (0.00125,0.00292] | NA         | (0.731,0.936] | (0.213,0.798] |
| 660 | (0.00179,0.00386] | (0.00292,0.00665] | NA         | (0.936,1.11]  | (0.798,1.72]  |
| 661 | NA                | NA                | NA         | (0,0.731]     | NA            |
| 662 | (0.00386,0.00875] | (0.00125,0.00292] | NA         | (0.936,1.11]  | (0.213,0.798] |
| 663 | (0.00179,0.00386] | (0.00292,0.00665] | NA         | (0.936,1.11]  | (0.798,1.72]  |
| 664 | (0,0.00179]       | (0,0.00125]       | NA         | (0,0.731]     | (0.213,0.798] |
| 665 | NA                | (0.00292,0.00665] | NA         | (1.11,Inf]    | (1.72,Inf]    |
| 666 | (0.00386,0.00875] | (0.00292,0.00665] | NA         | (0.936,1.11]  | (0.213,0.798] |
| 667 | (0.00386,0.00875] | (0.00292,0.00665] | NA         | (0.936,1.11]  | (0.798,1.72]  |
| 668 | (0.00386,0.00875] | (0.00292,0.00665] | NA         | (0.731,0.936] | (0.798,1.72]  |
| 669 | (0.00179,0.00386] | (0,0.00125]       | NA         | (1.11,Inf]    | (0.213,0.798] |
| 670 | (0,0.00179]       | NA                | NA         | (0.731,0.936] | NA            |
| 671 | (0,0.00179]       | (0.00125,0.00292] | NA         | (0.731,0.936] | (0.798,1.72]  |
| 672 | NA                | NA                | NA         | (0,0.731]     | NA            |
| 673 | (0.00875,Inf]     | (0.00665,Inf]     | (0.46,Inf] | (0.731,0.936] | (0.213,0.798] |
| 674 | (0.00386,0.00875] | (0.00292,0.00665] | NA         | (0.731,0.936] | (0.213,0.798] |
| 675 | (0.00179,0.00386] | (0.00125,0.00292] | NA         | (0,0.731]     | (0.213,0.798] |
| 676 | (0.00179,0.00386] | (0.00125,0.00292] | NA         | (0.936,1.11]  | (0.798,1.72]  |
| 677 | (0.00179,0.00386] | (0,0.00125]       | NA         | (0.731,0.936] | (0.213,0.798] |
| 678 | NA                | NA                | NA         | (0.936,1.11]  | NA            |
| 679 | (0,0.00179]       | (0.00292,0.00665] | NA         | (0,0.731]     | (1.72,Inf]    |
| 680 | (0.00386,0.00875] | (0.00125,0.00292] | NA         | (0,0.731]     | (0.213,0.798] |

|     |                   |                   |            |               |               |
|-----|-------------------|-------------------|------------|---------------|---------------|
| 681 | (0.00179,0.00386] | NA                | NA         | (0.936,1.11]  | NA            |
| 682 | (0,0.00179]       | (0,0.00125]       | NA         | (0.936,1.11]  | (0.213,0.798] |
| 683 | (0.00179,0.00386] | (0.00292,0.00665] | NA         | (0.731,0.936] | (1.72,Inf]    |
| 684 | (0.00386,0.00875] | (0.00292,0.00665] | NA         | (0.731,0.936] | (0.213,0.798] |
| 685 | (0.00179,0.00386] | (0.00125,0.00292] | NA         | (0.731,0.936] | (0.798,1.72]  |
| 686 | (0.00386,0.00875] | (0.00125,0.00292] | NA         | (0.936,1.11]  | (0.213,0.798] |
| 687 | (0.00875,Inf]     | (0.00665,Inf]     | NA         | (0.936,1.11]  | (0.213,0.798] |
| 688 | (0.00386,0.00875] | (0.00665,Inf]     | NA         | (0,0.731]     | (1.72,Inf]    |
| 689 | (0.00179,0.00386] | (0,0.00125]       | NA         | (1.11,Inf]    | (0,0.213]     |
| 690 | (0.00386,0.00875] | (0.00125,0.00292] | NA         | (0.731,0.936] | (0.213,0.798] |
| 691 | (0.00179,0.00386] | (0.00292,0.00665] | NA         | (1.11,Inf]    | (1.72,Inf]    |
| 692 | (0,0.00179]       | (0.00292,0.00665] | (0.46,Inf] | (0.731,0.936] | (1.72,Inf]    |
| 693 | (0.00875,Inf]     | (0.00292,0.00665] | NA         | (1.11,Inf]    | (0.213,0.798] |
| 694 | (0.00386,0.00875] | (0.00292,0.00665] | NA         | (1.11,Inf]    | (0.798,1.72]  |
| 695 | (0.00386,0.00875] | (0.00292,0.00665] | NA         | (1.11,Inf]    | (0.798,1.72]  |
| 696 | (0,0.00179]       | (0.00292,0.00665] | NA         | (0,0.731]     | (0.798,1.72]  |
| 697 | (0.00386,0.00875] | NA                | NA         | (0.731,0.936] | NA            |
| 698 | (0,0.00179]       | (0.00665,Inf]     | NA         | (1.11,Inf]    | (1.72,Inf]    |
| 699 | (0.00386,0.00875] | (0.00292,0.00665] | NA         | (0.936,1.11]  | (0.798,1.72]  |
| 700 | (0,0.00179]       | (0.00125,0.00292] | NA         | (1.11,Inf]    | (0.798,1.72]  |
| 701 | (0,0.00179]       | (0.00125,0.00292] | NA         | (0.936,1.11]  | (1.72,Inf]    |
| 702 | (0.00386,0.00875] | (0,0.00125]       | NA         | (1.11,Inf]    | (0,0.213]     |
| 703 | (0,0.00179]       | (0,0.00125]       | NA         | (0.731,0.936] | (0.213,0.798] |
| 704 | (0.00875,Inf]     | (0.00292,0.00665] | NA         | (1.11,Inf]    | (0.213,0.798] |
| 705 | (0.00179,0.00386] | (0,0.00125]       | NA         | (0.731,0.936] | (0.213,0.798] |
| 706 | (0.00386,0.00875] | (0.00292,0.00665] | NA         | (0.731,0.936] | (0.213,0.798] |
| 707 | (0.00386,0.00875] | (0.00292,0.00665] | NA         | (0.936,1.11]  | (0.798,1.72]  |
| 708 | (0.00179,0.00386] | (0.00125,0.00292] | NA         | (0,0.731]     | (0.213,0.798] |
| 709 | (0.00386,0.00875] | (0.00292,0.00665] | (0,0.46]   | (1.11,Inf]    | (0.213,0.798] |
| 710 | (0,0.00179]       | (0.00125,0.00292] | NA         | (0.731,0.936] | (1.72,Inf]    |
| 711 | (0.00386,0.00875] | (0.00292,0.00665] | NA         | (0.936,1.11]  | (0.213,0.798] |
| 712 | (0,0.00179]       | NA                | NA         | (0,0.731]     | NA            |
| 713 | (0.00386,0.00875] | (0.00292,0.00665] | NA         | (0.731,0.936] | (0.798,1.72]  |
| 714 | (0.00875,Inf]     | (0.00665,Inf]     | NA         | (0.936,1.11]  | (0.213,0.798] |
| 715 | (0.00386,0.00875] | (0.00125,0.00292] | NA         | (0.936,1.11]  | (0.213,0.798] |
| 716 | (0.00386,0.00875] | (0.00292,0.00665] | NA         | (0.731,0.936] | (0.798,1.72]  |
| 717 | (0.00386,0.00875] | (0.00665,Inf]     | (0,0.46]   | (0.936,1.11]  | (1.72,Inf]    |
| 718 | (0.00386,0.00875] | (0.00665,Inf]     | (0,0.46]   | (0.936,1.11]  | (1.72,Inf]    |

|     |                   |                   |            |               |               |
|-----|-------------------|-------------------|------------|---------------|---------------|
| 719 | (0.00179,0.00386] | (0.00125,0.00292] | (0.46,Inf] | (0.731,0.936] | (0.213,0.798] |
| 720 | (0.00179,0.00386] | (0.00125,0.00292] | (0.46,Inf] | (0.731,0.936] | (0.213,0.798] |
| 721 | (0.00386,0.00875] | (0.00292,0.00665] | NA         | (0.731,0.936] | (0.213,0.798] |
| 722 | (0.00386,0.00875] | (0.00125,0.00292] | NA         | (0.936,1.11]  | (0.213,0.798] |
| 723 | (0.00386,0.00875] | (0.00125,0.00292] | NA         | (1.11,Inf]    | (0.213,0.798] |
| 724 | (0,0.00179]       | (0,0.00125]       | NA         | (1.11,Inf]    | (0.798,1.72]  |
| 725 | (0.00386,0.00875] | (0.00665,Inf]     | NA         | (1.11,Inf]    | (1.72,Inf]    |
| 726 | (0.00386,0.00875] | (0.00125,0.00292] | NA         | (0.936,1.11]  | (0.213,0.798] |
| 727 | (0.00386,0.00875] | (0.00292,0.00665] | NA         | (0.936,1.11]  | (0.798,1.72]  |
| 728 | (0.00179,0.00386] | (0.00125,0.00292] | NA         | (0.936,1.11]  | (0.213,0.798] |
| 729 | (0.00179,0.00386] | (0.00125,0.00292] | NA         | (0.731,0.936] | (0.213,0.798] |
| 730 | (0.00386,0.00875] | (0.00125,0.00292] | NA         | (1.11,Inf]    | (0.798,1.72]  |
| 731 | (0.00875,Inf]     | (0.00292,0.00665] | NA         | (1.11,Inf]    | (0.213,0.798] |
| 732 | (0.00179,0.00386] | (0.00125,0.00292] | NA         | (0,0.731]     | (0.213,0.798] |
| 733 | NA                | NA                | NA         | (0,0.731]     | NA            |
| 734 | (0,0.00179]       | (0.00292,0.00665] | NA         | (0,0.731]     | (1.72,Inf]    |
| 735 | (0.00179,0.00386] | (0.00292,0.00665] | (0.46,Inf] | (0.731,0.936] | (0.798,1.72]  |
| 736 | (0.00386,0.00875] | (0.00665,Inf]     | NA         | (1.11,Inf]    | (0.798,1.72]  |
| 737 | (0.00179,0.00386] | (0,0.00125]       | NA         | (1.11,Inf]    | (0.213,0.798] |
| 738 | (0.00179,0.00386] | (0.00292,0.00665] | NA         | (1.11,Inf]    | (0.798,1.72]  |
| 739 | (0.00386,0.00875] | (0.00125,0.00292] | NA         | (0.936,1.11]  | (0.213,0.798] |
| 740 | (0.00875,Inf]     | (0.00125,0.00292] | NA         | (1.11,Inf]    | (0.213,0.798] |
| 741 | (0.00386,0.00875] | (0,0.00125]       | (0.46,Inf] | (1.11,Inf]    | (0,0.213]     |
| 742 | (0.00179,0.00386] | (0.00292,0.00665] | NA         | (1.11,Inf]    | (1.72,Inf]    |
| 743 | NA                | NA                | (0.46,Inf] | NA            | (0.798,1.72]  |
| 744 | (0.00875,Inf]     | (0.00665,Inf]     | (0.46,Inf] | (1.11,Inf]    | (0.213,0.798] |
| 745 | (0.00179,0.00386] | NA                | NA         | (1.11,Inf]    | NA            |
| 746 | (0,0.00179]       | (0.00292,0.00665] | NA         | (0.731,0.936] | (1.72,Inf]    |
| 747 | (0.00386,0.00875] | (0.00665,Inf]     | NA         | (1.11,Inf]    | (1.72,Inf]    |
| 748 | (0.00179,0.00386] | (0,0.00125]       | NA         | (1.11,Inf]    | (0.213,0.798] |
| 749 | NA                | (0,0.00125]       | NA         | (0,0.731]     | (1.72,Inf]    |
| 750 | (0.00875,Inf]     | (0.00665,Inf]     | NA         | (0.731,0.936] | (0.798,1.72]  |
| 751 | (0.00179,0.00386] | (0.00292,0.00665] | NA         | (0,0.731]     | (0.798,1.72]  |
| 752 | (0.00875,Inf]     | (0.00292,0.00665] | NA         | (0.936,1.11]  | (0.213,0.798] |
| 753 | (0.00386,0.00875] | (0.00125,0.00292] | NA         | (0.936,1.11]  | (0.213,0.798] |
| 754 | (0.00386,0.00875] | (0.00292,0.00665] | NA         | (0.731,0.936] | (0.213,0.798] |
| 755 | (0.00179,0.00386] | (0.00292,0.00665] | NA         | (0.731,0.936] | (0.798,1.72]  |
| 756 | (0.00386,0.00875] | (0.00125,0.00292] | (0.46,Inf] | (1.11,Inf]    | (0.213,0.798] |

|     |                   |                   |            |               |               |
|-----|-------------------|-------------------|------------|---------------|---------------|
| 757 | (0.00179,0.00386] | (0.00125,0.00292] | NA         | (1.11,Inf]    | (0.798,1.72]  |
| 758 | (0.00179,0.00386] | (0.00292,0.00665] | NA         | (0.936,1.11]  | (1.72,Inf]    |
| 759 | (0.00179,0.00386] | (0,0.00125]       | NA         | (0.936,1.11]  | (0.213,0.798] |
| 760 | NA                | NA                | NA         | NA            | (0.213,0.798] |
| 761 | (0.00179,0.00386] | (0.00665,Inf]     | NA         | (0,0.731]     | (0.798,1.72]  |
| 762 | (0.00179,0.00386] | (0.00665,Inf]     | NA         | (1.11,Inf]    | (1.72,Inf]    |
| 763 | (0.00179,0.00386] | (0.00292,0.00665] | NA         | (0,0.731]     | (0.798,1.72]  |
| 764 | NA                | (0,0.00125]       | NA         | (0.936,1.11]  | (1.72,Inf]    |
| 765 | NA                | NA                | NA         | (0.936,1.11]  | NA            |
| 766 | (0.00179,0.00386] | NA                | NA         | (0.936,1.11]  | NA            |
| 767 | (0.00386,0.00875] | (0.00292,0.00665] | (0.46,Inf] | (1.11,Inf]    | (0.213,0.798] |
| 768 | (0.00179,0.00386] | (0,0.00125]       | NA         | (0.936,1.11]  | (0.213,0.798] |
| 769 | (0.00875,Inf]     | (0,0.00125]       | NA         | (0.731,0.936] | (0,0.213]     |
| 770 | (0.00386,0.00875] | NA                | NA         | (0.731,0.936] | NA            |
| 771 | (0.00386,0.00875] | (0.00292,0.00665] | (0.46,Inf] | (0.731,0.936] | (0.213,0.798] |
| 772 | NA                | NA                | NA         | (0.731,0.936] | NA            |
| 773 | (0.00179,0.00386] | (0.00292,0.00665] | NA         | (0.731,0.936] | (0.798,1.72]  |
| 774 | NA                | NA                | NA         | (1.11,Inf]    | NA            |
| 775 | (0.00875,Inf]     | (0.00292,0.00665] | NA         | (0.936,1.11]  | (0.213,0.798] |
| 776 | (0,0.00179]       | (0.00125,0.00292] | NA         | (0.731,0.936] | (1.72,Inf]    |
| 777 | (0.00179,0.00386] | (0.00665,Inf]     | NA         | (0.731,0.936] | (1.72,Inf]    |
| 778 | (0.00386,0.00875] | (0.00665,Inf]     | NA         | (0.936,1.11]  | (0.798,1.72]  |
| 779 | (0.00179,0.00386] | (0.00292,0.00665] | NA         | (0,0.731]     | (0.213,0.798] |
| 780 | (0.00875,Inf]     | (0.00292,0.00665] | NA         | (0.731,0.936] | (0,0.213]     |
| 781 | (0,0.00179]       | (0,0.00125]       | NA         | (1.11,Inf]    | (0.213,0.798] |
| 782 | (0.00875,Inf]     | (0.00665,Inf]     | NA         | (1.11,Inf]    | (0.798,1.72]  |
| 783 | (0,0.00179]       | (0.00125,0.00292] | (0.46,Inf] | (0.936,1.11]  | (1.72,Inf]    |
| 784 | (0.00179,0.00386] | (0.00125,0.00292] | NA         | (0.936,1.11]  | (0.213,0.798] |
| 785 | (0.00386,0.00875] | (0.00665,Inf]     | NA         | (0.731,0.936] | (0.798,1.72]  |
| 786 | (0,0.00179]       | (0.00125,0.00292] | NA         | (0.936,1.11]  | (1.72,Inf]    |
| 787 | (0.00386,0.00875] | (0.00665,Inf]     | NA         | (0.731,0.936] | (0.213,0.798] |
| 788 | (0.00386,0.00875] | (0.00292,0.00665] | (0,0.46]   | (0.936,1.11]  | (0.798,1.72]  |
| 789 | NA                | NA                | NA         | (0,0.731]     | NA            |
| 790 | (0.00179,0.00386] | (0.00125,0.00292] | NA         | (0.731,0.936] | (0.213,0.798] |
| 791 | (0.00179,0.00386] | (0.00292,0.00665] | NA         | (0.936,1.11]  | (0.798,1.72]  |
| 792 | (0.00386,0.00875] | (0.00292,0.00665] | NA         | (0.731,0.936] | (0.213,0.798] |
| 793 | (0.00386,0.00875] | (0.00292,0.00665] | NA         | (0.731,0.936] | (0.213,0.798] |
| 794 | (0.00179,0.00386] | (0,0.00125]       | NA         | (0.731,0.936] | (0,0.213]     |

|     |                   |                   |            |               |               |
|-----|-------------------|-------------------|------------|---------------|---------------|
| 795 | (0.00875,Inf]     | (0.00292,0.00665] | NA         | (1.11,Inf]    | (0.213,0.798] |
| 796 | (0,0.00179]       | (0.00292,0.00665] | NA         | (1.11,Inf]    | (1.72,Inf]    |
| 797 | (0.00179,0.00386] | NA                | NA         | (0.731,0.936] | NA            |
| 798 | NA                | NA                | NA         | (0.936,1.11]  | NA            |
| 799 | (0.00875,Inf]     | (0.00665,Inf]     | NA         | (1.11,Inf]    | (0.798,1.72]  |
| 800 | (0.00386,0.00875] | (0.00292,0.00665] | NA         | (0.731,0.936] | (0.798,1.72]  |
| 801 | NA                | (0.00125,0.00292] | NA         | (0,0.731]     | (1.72,Inf]    |
| 802 | NA                | NA                | NA         | (1.11,Inf]    | NA            |
| 803 | (0.00179,0.00386] | (0.00292,0.00665] | NA         | (0.936,1.11]  | (0.798,1.72]  |
| 804 | (0,0.00179]       | NA                | NA         | (0.731,0.936] | NA            |
| 805 | (0,0.00179]       | (0.00665,Inf]     | (0.46,Inf] | (0.731,0.936] | (1.72,Inf]    |
| 806 | (0,0.00179]       | (0.00125,0.00292] | NA         | (0.731,0.936] | (0.213,0.798] |
| 807 | (0,0.00179]       | (0.00125,0.00292] | NA         | (0.936,1.11]  | (1.72,Inf]    |
| 808 | (0.00179,0.00386] | (0.00292,0.00665] | NA         | (0.731,0.936] | (0.798,1.72]  |
| 809 | (0.00179,0.00386] | NA                | NA         | (0.731,0.936] | NA            |
| 810 | (0.00179,0.00386] | (0,0.00125]       | (0.46,Inf] | (0,0.731]     | (0,0.213]     |
| 811 | (0.00386,0.00875] | (0.00665,Inf]     | NA         | (0.731,0.936] | (0.798,1.72]  |
| 812 | (0.00386,0.00875] | (0.00125,0.00292] | NA         | (0.731,0.936] | (0.213,0.798] |
| 813 | (0.00179,0.00386] | (0,0.00125]       | NA         | (1.11,Inf]    | (0.213,0.798] |
| 814 | (0,0.00179]       | (0.00125,0.00292] | NA         | (0.731,0.936] | (0.798,1.72]  |
| 815 | (0.00386,0.00875] | (0.00125,0.00292] | NA         | (0,0.731]     | (0.213,0.798] |
| 816 | (0.00179,0.00386] | (0.00292,0.00665] | NA         | (0,0.731]     | (0.213,0.798] |
| 817 | (0.00179,0.00386] | (0,0.00125]       | NA         | (1.11,Inf]    | (0,0.213]     |
| 818 | (0.00179,0.00386] | NA                | NA         | (0,0.731]     | NA            |
| 819 | NA                | (0,0.00125]       | NA         | (0,0.731]     | (1.72,Inf]    |
| 820 | (0.00179,0.00386] | (0.00292,0.00665] | NA         | (0,0.731]     | (0.798,1.72]  |
| 821 | (0.00875,Inf]     | (0.00665,Inf]     | NA         | (0.731,0.936] | (0.798,1.72]  |
| 822 | (0.00179,0.00386] | (0.00125,0.00292] | NA         | (0.936,1.11]  | (0.213,0.798] |
| 823 | (0.00179,0.00386] | (0.00292,0.00665] | NA         | (0,0.731]     | (0.798,1.72]  |
| 824 | (0,0.00179]       | NA                | NA         | (0,0.731]     | NA            |
| 825 | NA                | (0.00125,0.00292] | NA         | (0.731,0.936] | (1.72,Inf]    |
| 826 | (0,0.00179]       | (0.00292,0.00665] | NA         | (1.11,Inf]    | (1.72,Inf]    |
| 827 | (0.00179,0.00386] | (0.00292,0.00665] | NA         | (0.731,0.936] | (0.798,1.72]  |
| 828 | (0.00386,0.00875] | (0.00665,Inf]     | NA         | (0,0.731]     | (1.72,Inf]    |
| 829 | (0,0.00179]       | (0.00125,0.00292] | NA         | (0.936,1.11]  | (1.72,Inf]    |
| 830 | (0,0.00179]       | (0.00292,0.00665] | NA         | (1.11,Inf]    | (1.72,Inf]    |
| 831 | (0.00875,Inf]     | (0.00665,Inf]     | NA         | (0.731,0.936] | (0.213,0.798] |
| 832 | (0.00386,0.00875] | (0.00292,0.00665] | NA         | (0.731,0.936] | (0.798,1.72]  |

|     |                   |                   |            |               |               |
|-----|-------------------|-------------------|------------|---------------|---------------|
| 833 | (0.00875,Inf]     | (0.00665,Inf]     | NA         | (0.936,1.11]  | (0.798,1.72]  |
| 834 | (0.00875,Inf]     | (0.00665,Inf]     | NA         | (0.936,1.11]  | (0.798,1.72]  |
| 835 | (0.00386,0.00875] | (0.00665,Inf]     | NA         | (0,0.731]     | (0.798,1.72]  |
| 836 | (0.00179,0.00386] | (0.00125,0.00292] | NA         | (0.731,0.936] | (0.213,0.798] |
| 837 | (0.00179,0.00386] | (0.00292,0.00665] | NA         | (0,0.731]     | (1.72,Inf]    |
| 838 | (0.00179,0.00386] | (0,0.00125]       | NA         | (1.11,Inf]    | (0,0.213]     |
| 839 | NA                | NA                | NA         | (0,0.731]     | NA            |
| 840 | (0,0.00179]       | (0.00125,0.00292] | NA         | (0.731,0.936] | (0.798,1.72]  |
| 841 | (0.00179,0.00386] | NA                | NA         | (0.731,0.936] | NA            |
| 842 | (0.00179,0.00386] | (0.00665,Inf]     | NA         | (1.11,Inf]    | (1.72,Inf]    |
| 843 | NA                | NA                | NA         | (0.936,1.11]  | NA            |
| 844 | NA                | NA                | NA         | (0.936,1.11]  | NA            |
| 845 | (0,0.00179]       | (0.00125,0.00292] | NA         | (1.11,Inf]    | (1.72,Inf]    |
| 846 | (0.00179,0.00386] | (0.00125,0.00292] | NA         | (0.731,0.936] | (0.213,0.798] |
| 847 | (0.00386,0.00875] | (0.00292,0.00665] | NA         | (0.731,0.936] | (0.213,0.798] |
| 848 | (0.00179,0.00386] | (0.00125,0.00292] | NA         | (0,0.731]     | (0.213,0.798] |
| 849 | (0,0.00179]       | (0.00125,0.00292] | NA         | (0,0.731]     | (0.798,1.72]  |
| 850 | (0,0.00179]       | (0.00125,0.00292] | NA         | (0,0.731]     | (0.798,1.72]  |
| 851 | (0.00179,0.00386] | (0,0.00125]       | NA         | (0.731,0.936] | (0,0.213]     |
| 852 | (0.00179,0.00386] | NA                | (0.46,Inf] | (0.731,0.936] | NA            |
| 853 | (0.00179,0.00386] | (0.00292,0.00665] | NA         | (0.731,0.936] | (0.798,1.72]  |
| 854 | (0.00386,0.00875] | (0.00292,0.00665] | NA         | (0,0.731]     | (0.213,0.798] |
| 855 | (0,0.00179]       | (0,0.00125]       | NA         | (0.936,1.11]  | (0.213,0.798] |
| 856 | (0.00179,0.00386] | (0.00292,0.00665] | NA         | (0,0.731]     | (0.213,0.798] |
| 857 | (0.00386,0.00875] | (0.00292,0.00665] | (0.46,Inf] | (1.11,Inf]    | (0.798,1.72]  |
| 858 | (0,0.00179]       | NA                | NA         | (0.936,1.11]  | NA            |
| 859 | (0.00386,0.00875] | NA                | NA         | (0.936,1.11]  | NA            |
| 860 | (0.00386,0.00875] | NA                | NA         | (0.731,0.936] | NA            |
| 861 | (0.00875,Inf]     | (0.00292,0.00665] | NA         | (0.936,1.11]  | (0.213,0.798] |
| 862 | (0.00386,0.00875] | (0.00292,0.00665] | NA         | (0.731,0.936] | (0.798,1.72]  |
| 863 | (0.00179,0.00386] | (0.00292,0.00665] | NA         | (0,0.731]     | (0.798,1.72]  |
| 864 | (0.00179,0.00386] | (0.00125,0.00292] | NA         | (0.936,1.11]  | (0.213,0.798] |
| 865 | (0.00386,0.00875] | (0.00125,0.00292] | (0.46,Inf] | (0.731,0.936] | (0.213,0.798] |
| 866 | (0.00179,0.00386] | NA                | NA         | (0,0.731]     | NA            |
| 867 | (0.00179,0.00386] | NA                | NA         | (0.936,1.11]  | NA            |
| 868 | (0.00386,0.00875] | NA                | NA         | (0.936,1.11]  | NA            |
| 869 | (0.00179,0.00386] | (0.00292,0.00665] | NA         | (0.936,1.11]  | (0.798,1.72]  |
| 870 | (0.00386,0.00875] | (0.00292,0.00665] | (0.46,Inf] | (0,0.731]     | (0.213,0.798] |

|     |                   |                   |            |               |               |
|-----|-------------------|-------------------|------------|---------------|---------------|
| 871 | (0.00179,0.00386] | (0.00292,0.00665] | NA         | (0.731,0.936] | (1.72,Inf]    |
| 872 | (0.00875,Inf]     | (0.00292,0.00665] | NA         | (0.731,0.936] | (0.213,0.798] |
| 873 | (0.00875,Inf]     | (0.00292,0.00665] | (0.46,Inf] | (1.11,Inf]    | (0.213,0.798] |
| 874 | (0.00875,Inf]     | (0.00665,Inf]     | NA         | (0.936,1.11]  | (0.798,1.72]  |
| 875 | (0,0.00179]       | NA                | NA         | (0.731,0.936] | NA            |
| 876 | (0.00179,0.00386] | (0.00665,Inf]     | NA         | (0.731,0.936] | (1.72,Inf]    |
| 877 | (0.00179,0.00386] | (0.00125,0.00292] | NA         | (0,0.731]     | (0.213,0.798] |
| 878 | (0,0.00179]       | NA                | NA         | (0.731,0.936] | NA            |
| 879 | (0.00386,0.00875] | (0.00292,0.00665] | (0,0.46]   | (1.11,Inf]    | (0.798,1.72]  |
| 880 | (0.00179,0.00386] | (0.00292,0.00665] | NA         | (0,0.731]     | (0.798,1.72]  |
| 881 | (0.00179,0.00386] | (0.00125,0.00292] | NA         | (0.936,1.11]  | (0.213,0.798] |
| 882 | (0.00386,0.00875] | (0.00125,0.00292] | (0.46,Inf] | (0,0.731]     | (0,0.213]     |
| 883 | NA                | (0,0.00125]       | NA         | (0,0.731]     | (1.72,Inf]    |
| 884 | (0.00386,0.00875] | (0.00125,0.00292] | NA         | (0.731,0.936] | (0.213,0.798] |
| 885 | (0.00386,0.00875] | (0.00292,0.00665] | NA         | (0.731,0.936] | (0.798,1.72]  |
| 886 | (0.00875,Inf]     | (0.00292,0.00665] | NA         | (1.11,Inf]    | (0.213,0.798] |
| 887 | (0,0.00179]       | (0,0.00125]       | NA         | (0.936,1.11]  | (0.798,1.72]  |
| 888 | (0.00179,0.00386] | (0.00292,0.00665] | NA         | (0,0.731]     | (0.798,1.72]  |
| 889 | (0.00386,0.00875] | (0.00292,0.00665] | (0.46,Inf] | (0.731,0.936] | (0.798,1.72]  |
| 890 | NA                | NA                | NA         | (0.731,0.936] | NA            |
| 891 | (0.00386,0.00875] | (0.00292,0.00665] | NA         | (0.731,0.936] | (0.213,0.798] |
| 892 | NA                | NA                | NA         | (1.11,Inf]    | NA            |
| 893 | NA                | NA                | NA         | (1.11,Inf]    | NA            |
| 894 | (0.00875,Inf]     | (0.00665,Inf]     | NA         | (1.11,Inf]    | (0.798,1.72]  |
| 895 | (0.00386,0.00875] | (0.00125,0.00292] | NA         | (0.936,1.11]  | (0.213,0.798] |
| 896 | (0.00386,0.00875] | (0.00292,0.00665] | NA         | (0.731,0.936] | (0.213,0.798] |
| 897 | (0.00386,0.00875] | NA                | NA         | (1.11,Inf]    | NA            |
| 898 | (0.00179,0.00386] | (0.00125,0.00292] | NA         | (0.731,0.936] | (0.213,0.798] |
| 899 | (0,0.00179]       | (0,0.00125]       | NA         | (0,0.731]     | (0.213,0.798] |
| 900 | (0,0.00179]       | (0.00125,0.00292] | NA         | (0.936,1.11]  | (1.72,Inf]    |
| 901 | (0.00179,0.00386] | (0,0.00125]       | NA         | (0,0.731]     | (0,0.213]     |
| 902 | (0.00179,0.00386] | NA                | NA         | (0.936,1.11]  | NA            |
| 903 | (0.00386,0.00875] | (0.00665,Inf]     | NA         | (0.936,1.11]  | (0.798,1.72]  |
| 904 | (0,0.00179]       | (0,0.00125]       | NA         | (0.731,0.936] | (0.798,1.72]  |
| 905 | (0.00386,0.00875] | (0.00665,Inf]     | (0,0.46]   | (1.11,Inf]    | (1.72,Inf]    |
| 906 | (0.00386,0.00875] | (0.00125,0.00292] | NA         | (1.11,Inf]    | (0.213,0.798] |
| 907 | (0.00179,0.00386] | (0.00292,0.00665] | NA         | (1.11,Inf]    | (1.72,Inf]    |
| 908 | (0,0.00179]       | (0,0.00125]       | NA         | (0.936,1.11]  | (0.798,1.72]  |



|     |                   |                   |            |               |               |
|-----|-------------------|-------------------|------------|---------------|---------------|
| 909 | (0.00179,0.00386] | (0.00292,0.00665] | NA         | (0.731,0.936] | (0.213,0.798] |
| 910 | (0,0.00179]       | (0.00292,0.00665] | NA         | (0,0.731]     | (1.72,Inf]    |
| 911 | (0.00386,0.00875] | (0.00665,Inf]     | NA         | (0.731,0.936] | (0.798,1.72]  |
| 912 | (0,0.00179]       | NA                | NA         | (0.936,1.11]  | NA            |
| 913 | NA                | (0,0.00125]       | NA         | (1.11,Inf]    | (1.72,Inf]    |
| 914 | (0.00179,0.00386] | (0.00125,0.00292] | NA         | (0.936,1.11]  | (0.798,1.72]  |
| 915 | NA                | NA                | (0,0.46]   | NA            | (0.798,1.72]  |
| 916 | (0,0.00179]       | NA                | NA         | (1.11,Inf]    | NA            |
| 917 | (0.00386,0.00875] | (0.00292,0.00665] | NA         | (0.731,0.936] | (0.213,0.798] |
| 918 | (0.00386,0.00875] | (0.00292,0.00665] | NA         | (0.731,0.936] | (0.213,0.798] |
| 919 | (0,0.00179]       | NA                | NA         | (0,0.731]     | NA            |
| 920 | (0.00179,0.00386] | NA                | (0.46,Inf] | (0.731,0.936] | NA            |
| 921 | (0.00875,Inf]     | (0.00665,Inf]     | NA         | (0.731,0.936] | (0.213,0.798] |
| 922 | (0.00875,Inf]     | (0.00665,Inf]     | NA         | (0,0.731]     | (0.798,1.72]  |
| 923 | (0.00179,0.00386] | (0.00292,0.00665] | NA         | (0.936,1.11]  | (0.798,1.72]  |
| 924 | (0.00179,0.00386] | (0.00125,0.00292] | NA         | (0.936,1.11]  | (0.798,1.72]  |
| 925 | (0.00875,Inf]     | (0.00665,Inf]     | NA         | (0.936,1.11]  | (0.213,0.798] |
| 926 | (0,0.00179]       | (0.00125,0.00292] | NA         | (0.731,0.936] | (1.72,Inf]    |
| 927 | (0.00875,Inf]     | (0.00292,0.00665] | NA         | (1.11,Inf]    | (0.213,0.798] |
| 928 | NA                | NA                | NA         | (0.731,0.936] | NA            |
| 929 | (0,0.00179]       | (0.00665,Inf]     | NA         | (0.731,0.936] | (1.72,Inf]    |
| 930 | (0.00875,Inf]     | (0.00292,0.00665] | NA         | (0.731,0.936] | (0.213,0.798] |
| 931 | (0.00386,0.00875] | NA                | NA         | (0.936,1.11]  | NA            |
| 932 | (0.00875,Inf]     | (0.00292,0.00665] | (0.46,Inf] | (0.731,0.936] | (0.213,0.798] |
| 933 | (0.00875,Inf]     | (0.00292,0.00665] | (0.46,Inf] | (1.11,Inf]    | (0.213,0.798] |
| 934 | (0.00386,0.00875] | NA                | NA         | (0.936,1.11]  | NA            |
| 935 | (0.00179,0.00386] | (0,0.00125]       | NA         | (0,0.731]     | (0,0.213]     |
| 936 | (0.00386,0.00875] | (0,0.00125]       | NA         | (0.731,0.936] | (0,0.213]     |
| 937 | (0.00386,0.00875] | (0,0.00125]       | NA         | (0.731,0.936] | (0,0.213]     |
| 938 | (0.00875,Inf]     | (0.00125,0.00292] | NA         | (1.11,Inf]    | (0.213,0.798] |
| 939 | (0.00386,0.00875] | NA                | NA         | (0.731,0.936] | NA            |
| 940 | (0.00386,0.00875] | (0.00665,Inf]     | NA         | (0.731,0.936] | (0.798,1.72]  |
| 941 | (0.00875,Inf]     | (0.00665,Inf]     | NA         | (0,0.731]     | (0.798,1.72]  |
| 942 | (0,0.00179]       | (0.00292,0.00665] | (0.46,Inf] | (0,0.731]     | (1.72,Inf]    |
| 943 | (0.00875,Inf]     | (0.00292,0.00665] | (0.46,Inf] | (1.11,Inf]    | (0.213,0.798] |
| 944 | (0.00386,0.00875] | (0.00665,Inf]     | (0.46,Inf] | (0.936,1.11]  | (0.798,1.72]  |
| 945 | (0.00179,0.00386] | NA                | NA         | (1.11,Inf]    | NA            |
| 946 | (0.00386,0.00875] | (0,0.00125]       | NA         | (0.731,0.936] | (0,0.213]     |

|     |                   |                   |            |               |               |
|-----|-------------------|-------------------|------------|---------------|---------------|
| 947 | (0.00386,0.00875] | (0.00292,0.00665] | (0,0.46]   | (0,0.731]     | (0.213,0.798] |
| 948 | (0.00386,0.00875] | (0.00292,0.00665] | NA         | (0,0.731]     | (0.213,0.798] |
| 949 | (0,0.00179]       | (0,0.00125]       | NA         | (1.11,Inf]    | (0.798,1.72]  |
| 950 | (0.00386,0.00875] | (0.00125,0.00292] | NA         | (1.11,Inf]    | (0.798,1.72]  |
| 951 | (0.00179,0.00386] | NA                | (0.46,Inf] | (0.731,0.936] | NA            |
| 952 | (0.00386,0.00875] | (0.00292,0.00665] | (0,0.46]   | (0.731,0.936] | (0.213,0.798] |
| 953 | (0.00386,0.00875] | (0,0.00125]       | NA         | (0.936,1.11]  | (0,0.213]     |
| 954 | NA                | NA                | NA         | (0.936,1.11]  | NA            |
| 955 | (0.00179,0.00386] | (0.00665,Inf]     | NA         | (0.936,1.11]  | (1.72,Inf]    |
| 956 | (0.00875,Inf]     | (0.00665,Inf]     | NA         | (0.936,1.11]  | (0.798,1.72]  |
| 957 | (0.00179,0.00386] | (0.00125,0.00292] | NA         | (1.11,Inf]    | (0.213,0.798] |
| 958 | (0.00875,Inf]     | (0.00665,Inf]     | NA         | (0.936,1.11]  | (0.213,0.798] |
| 959 | NA                | NA                | NA         | (0.731,0.936] | NA            |
| 960 | (0.00875,Inf]     | (0.00665,Inf]     | (0,0.46]   | (0.731,0.936] | (0.213,0.798] |
| 961 | (0,0.00179]       | (0.00125,0.00292] | NA         | (0.731,0.936] | (0.798,1.72]  |
| 962 | (0,0.00179]       | (0.00665,Inf]     | NA         | (0.731,0.936] | (1.72,Inf]    |
| 963 | (0.00386,0.00875] | (0.00665,Inf]     | NA         | (0.731,0.936] | (1.72,Inf]    |
| 964 | (0.00875,Inf]     | NA                | NA         | (0.936,1.11]  | NA            |
| 965 | (0.00875,Inf]     | (0.00665,Inf]     | NA         | (0,0.731]     | (0.798,1.72]  |
| 966 | (0.00179,0.00386] | (0.00125,0.00292] | NA         | (0.936,1.11]  | (0.798,1.72]  |
| 967 | (0.00875,Inf]     | (0.00665,Inf]     | NA         | (0,0.731]     | (0.213,0.798] |
| 968 | (0,0.00179]       | (0.00292,0.00665] | NA         | (0.731,0.936] | (1.72,Inf]    |
| 969 | (0.00386,0.00875] | (0,0.00125]       | NA         | (0.936,1.11]  | (0,0.213]     |
| 970 | (0.00386,0.00875] | (0.00292,0.00665] | (0.46,Inf] | (0.731,0.936] | (0.798,1.72]  |
| 971 | NA                | NA                | NA         | (0.731,0.936] | NA            |
| 972 | (0.00386,0.00875] | NA                | NA         | (0.731,0.936] | NA            |
| 973 | (0.00875,Inf]     | (0.00665,Inf]     | NA         | (0.731,0.936] | (0.798,1.72]  |
| 974 | (0.00875,Inf]     | (0.00665,Inf]     | (0.46,Inf] | (0.936,1.11]  | (0.213,0.798] |
| 975 | NA                | (0.00665,Inf]     | NA         | (0.731,0.936] | (1.72,Inf]    |
| 976 | (0.00179,0.00386] | (0.00292,0.00665] | NA         | (0.731,0.936] | (0.798,1.72]  |
| 977 | (0.00875,Inf]     | (0.00292,0.00665] | (0.46,Inf] | (1.11,Inf]    | (0.213,0.798] |
| 978 | (0.00386,0.00875] | (0.00292,0.00665] | NA         | (0.731,0.936] | (0.213,0.798] |
| 979 | (0.00875,Inf]     | (0.00665,Inf]     | NA         | (0.731,0.936] | (0.213,0.798] |
| 980 | (0.00386,0.00875] | (0.00125,0.00292] | NA         | (1.11,Inf]    | (0.798,1.72]  |
| 981 | NA                | NA                | NA         | (0.936,1.11]  | NA            |
| 982 | NA                | NA                | NA         | (0.731,0.936] | NA            |
| 983 | (0.00386,0.00875] | (0.00292,0.00665] | NA         | (1.11,Inf]    | (0.798,1.72]  |
| 984 | NA                | NA                | NA         | (0.731,0.936] | NA            |

|      |                   |                   |            |               |               |
|------|-------------------|-------------------|------------|---------------|---------------|
| 985  | (0.00179,0.00386] | NA                | NA         | (0.731,0.936] | NA            |
| 986  | (0.00386,0.00875] | (0,0.00125]       | (0.46,Inf] | (0.936,1.11]  | (0,0.213]     |
| 987  | (0.00386,0.00875] | (0,0.00125]       | NA         | (0.936,1.11]  | (0,0.213]     |
| 988  | (0,0.00179]       | (0.00125,0.00292] | NA         | (0,0.731]     | (0.798,1.72]  |
| 989  | (0.00179,0.00386] | (0.00665,Inf]     | NA         | (0,0.731]     | (1.72,Inf]    |
| 990  | (0.00875,Inf]     | NA                | NA         | (1.11,Inf]    | NA            |
| 991  | (0,0.00179]       | (0.00665,Inf]     | (0,0.46]   | (0.936,1.11]  | (1.72,Inf]    |
| 992  | (0.00386,0.00875] | (0,0.00125]       | NA         | (0.731,0.936] | (0,0.213]     |
| 993  | (0.00875,Inf]     | (0.00292,0.00665] | NA         | (1.11,Inf]    | (0.213,0.798] |
| 994  | (0,0.00179]       | (0,0.00125]       | NA         | (0.731,0.936] | (0.213,0.798] |
| 995  | NA                | (0.00665,Inf]     | NA         | (0,0.731]     | (1.72,Inf]    |
| 996  | NA                | NA                | NA         | (0.731,0.936] | NA            |
| 997  | NA                | (0.00292,0.00665] | NA         | (0.936,1.11]  | (1.72,Inf]    |
| 998  | (0.00386,0.00875] | (0.00292,0.00665] | NA         | (0.731,0.936] | (0.213,0.798] |
| 999  | (0.00386,0.00875] | (0.00292,0.00665] | NA         | (0.731,0.936] | (0.798,1.72]  |
| 1000 | (0.00179,0.00386] | (0.00292,0.00665] | NA         | (0,0.731]     | (0.798,1.72]  |
| 1001 | NA                | (0,0.00125]       | NA         | (0.731,0.936] | (1.72,Inf]    |
| 1002 | (0.00386,0.00875] | (0.00292,0.00665] | NA         | (0.731,0.936] | (0.213,0.798] |
| 1003 | NA                | (0.00292,0.00665] | NA         | (0.731,0.936] | (1.72,Inf]    |
| 1004 | (0.00386,0.00875] | (0.00125,0.00292] | NA         | (1.11,Inf]    | (0.213,0.798] |
| 1005 | NA                | NA                | NA         | (0,0.731]     | NA            |
| 1006 | (0.00179,0.00386] | NA                | NA         | (0.731,0.936] | NA            |
| 1007 | (0.00875,Inf]     | (0.00292,0.00665] | (0.46,Inf] | (0.936,1.11]  | (0.213,0.798] |
| 1008 | (0.00386,0.00875] | (0,0.00125]       | NA         | (1.11,Inf]    | (0.213,0.798] |
| 1009 | (0.00179,0.00386] | NA                | NA         | (1.11,Inf]    | NA            |
| 1010 | (0.00386,0.00875] | (0.00665,Inf]     | NA         | (0.731,0.936] | (0.798,1.72]  |
| 1011 | (0.00386,0.00875] | NA                | NA         | (0.936,1.11]  | NA            |
| 1012 | NA                | NA                | NA         | (0,0.731]     | NA            |
| 1013 | (0,0.00179]       | (0.00125,0.00292] | NA         | (1.11,Inf]    | (1.72,Inf]    |
| 1014 | NA                | NA                | NA         | (0.936,1.11]  | NA            |
| 1015 | (0,0.00179]       | (0.00125,0.00292] | NA         | (0.936,1.11]  | (0.798,1.72]  |
| 1016 | NA                | (0,0.00125]       | NA         | (0.731,0.936] | (1.72,Inf]    |
| 1017 | (0.00179,0.00386] | NA                | NA         | (0,0.731]     | NA            |
| 1018 | (0.00386,0.00875] | (0.00125,0.00292] | NA         | (0.936,1.11]  | (0.213,0.798] |
| 1019 | (0.00179,0.00386] | (0.00665,Inf]     | NA         | (0,0.731]     | (1.72,Inf]    |
| 1020 | NA                | NA                | NA         | (0,0.731]     | NA            |
| 1021 | NA                | NA                | NA         | (0,0.731]     | NA            |
| 1022 | (0.00179,0.00386] | (0.00125,0.00292] | NA         | (0.731,0.936] | (0.798,1.72]  |

|      |                   |                   |            |               |               |
|------|-------------------|-------------------|------------|---------------|---------------|
| 1023 | (0.00875,Inf]     | (0.00125,0.00292] | NA         | (0.936,1.11]  | (0,0.213]     |
| 1024 | NA                | NA                | NA         | (0.731,0.936] | NA            |
| 1025 | (0.00386,0.00875] | (0.00665,Inf]     | NA         | (0.936,1.11]  | (0.798,1.72]  |
| 1026 | (0.00875,Inf]     | (0.00292,0.00665] | NA         | (0.731,0.936] | (0.213,0.798] |
| 1027 | NA                | (0,0.00125]       | NA         | (0.936,1.11]  | (1.72,Inf]    |
| 1028 | NA                | (0.00125,0.00292] | NA         | (0.731,0.936] | (1.72,Inf]    |
| 1029 | NA                | NA                | NA         | (1.11,Inf]    | NA            |
| 1030 | (0.00386,0.00875] | (0.00292,0.00665] | (0,0.46]   | (0.936,1.11]  | (0.213,0.798] |
| 1031 | (0.00386,0.00875] | NA                | NA         | (0.936,1.11]  | NA            |
| 1032 | (0.00875,Inf]     | (0.00665,Inf]     | NA         | (0.936,1.11]  | (0.213,0.798] |
| 1033 | (0.00386,0.00875] | (0,0.00125]       | NA         | (0.936,1.11]  | (0,0.213]     |
| 1034 | (0.00386,0.00875] | (0.00125,0.00292] | NA         | (0.731,0.936] | (0.213,0.798] |
| 1035 | NA                | NA                | (0.46,Inf] | (0,0.731]     | NA            |
| 1036 | (0.00386,0.00875] | (0.00292,0.00665] | (0.46,Inf] | (0.936,1.11]  | (0.213,0.798] |
| 1037 | (0.00179,0.00386] | NA                | NA         | (0.731,0.936] | NA            |
| 1038 | (0.00386,0.00875] | (0.00665,Inf]     | NA         | (1.11,Inf]    | (1.72,Inf]    |
| 1039 | (0.00386,0.00875] | (0.00665,Inf]     | NA         | (0,0.731]     | (1.72,Inf]    |
| 1040 | NA                | (0.00292,0.00665] | NA         | (0.731,0.936] | (1.72,Inf]    |
| 1041 | (0.00875,Inf]     | (0.00665,Inf]     | (0.46,Inf] | (0.936,1.11]  | (0.798,1.72]  |
| 1042 | (0.00386,0.00875] | (0.00292,0.00665] | NA         | (1.11,Inf]    | (0.213,0.798] |
| 1043 | NA                | (0,0.00125]       | NA         | (0.731,0.936] | (1.72,Inf]    |
| 1044 | (0.00875,Inf]     | (0.00665,Inf]     | NA         | (1.11,Inf]    | (0.798,1.72]  |
| 1045 | (0.00386,0.00875] | (0.00292,0.00665] | NA         | (0.936,1.11]  | (0.798,1.72]  |
| 1046 | (0.00386,0.00875] | (0.00125,0.00292] | (0.46,Inf] | (1.11,Inf]    | (0.213,0.798] |
| 1047 | (0.00386,0.00875] | NA                | NA         | (0,0.731]     | NA            |
| 1048 | NA                | NA                | NA         | (0.936,1.11]  | NA            |
| 1049 | (0.00875,Inf]     | (0.00292,0.00665] | NA         | (1.11,Inf]    | (0.213,0.798] |
| 1050 | (0.00386,0.00875] | (0,0.00125]       | NA         | (0.936,1.11]  | (0,0.213]     |
| 1051 | (0.00179,0.00386] | (0.00125,0.00292] | NA         | (1.11,Inf]    | (0.798,1.72]  |
| 1052 | (0.00875,Inf]     | (0.00665,Inf]     | NA         | (1.11,Inf]    | (1.72,Inf]    |
| 1053 | (0.00875,Inf]     | (0.00665,Inf]     | NA         | (0.936,1.11]  | (0.213,0.798] |
| 1054 | (0.00875,Inf]     | (0,0.00125]       | NA         | (1.11,Inf]    | (0,0.213]     |
| 1055 | (0.00875,Inf]     | (0.00665,Inf]     | NA         | (0,0.731]     | (0.798,1.72]  |
| 1056 | NA                | NA                | NA         | (0,0.731]     | NA            |
| 1057 | (0.00875,Inf]     | (0.00125,0.00292] | NA         | (1.11,Inf]    | (0,0.213]     |
| 1058 | NA                | (0.00125,0.00292] | NA         | (1.11,Inf]    | (1.72,Inf]    |
| 1059 | (0,0.00179]       | (0.00292,0.00665] | NA         | (1.11,Inf]    | (1.72,Inf]    |
| 1060 | (0.00386,0.00875] | (0.00125,0.00292] | NA         | (0.731,0.936] | (0.213,0.798] |

|      |                   |                   |            |               |               |
|------|-------------------|-------------------|------------|---------------|---------------|
| 1061 | NA                | NA                | NA         | (0.731,0.936] | NA            |
| 1062 | (0.00386,0.00875] | (0.00292,0.00665] | NA         | (0,0.731]     | (0.213,0.798] |
| 1063 | (0.00179,0.00386] | (0.00125,0.00292] | NA         | (0.731,0.936] | (0.213,0.798] |
| 1064 | (0.00875,Inf]     | (0.00125,0.00292] | (0.46,Inf] | (1.11,Inf]    | (0,0.213]     |
| 1065 | NA                | NA                | NA         | (0,0.731]     | NA            |
| 1066 | (0.00386,0.00875] | (0.00292,0.00665] | NA         | (0.731,0.936] | (0.213,0.798] |
| 1067 | (0.00875,Inf]     | (0.00665,Inf]     | NA         | (1.11,Inf]    | (1.72,Inf]    |
| 1068 | (0.00875,Inf]     | (0.00292,0.00665] | NA         | (0.731,0.936] | (0.213,0.798] |
| 1069 | (0.00386,0.00875] | NA                | NA         | (0.731,0.936] | NA            |
| 1070 | (0.00386,0.00875] | (0.00665,Inf]     | NA         | (0.936,1.11]  | (0.798,1.72]  |
| 1071 | NA                | NA                | NA         | (0.731,0.936] | NA            |
| 1072 | NA                | NA                | NA         | (0.936,1.11]  | NA            |
| 1073 | NA                | NA                | NA         | (0,0.731]     | NA            |
| 1074 | (0.00179,0.00386] | (0,0.00125]       | NA         | (0.731,0.936] | (0.213,0.798] |
| 1075 | (0.00875,Inf]     | (0.00665,Inf]     | NA         | (0,0.731]     | (0.798,1.72]  |
| 1076 | (0.00386,0.00875] | (0.00125,0.00292] | NA         | (0.731,0.936] | (0,0.213]     |
| 1077 | NA                | NA                | NA         | (1.11,Inf]    | NA            |
| 1078 | NA                | (0.00292,0.00665] | NA         | (0.936,1.11]  | (1.72,Inf]    |
| 1079 | NA                | NA                | NA         | (0.731,0.936] | NA            |
| 1080 | (0.00386,0.00875] | NA                | NA         | (1.11,Inf]    | NA            |
| 1081 | (0.00179,0.00386] | NA                | NA         | (0,0.731]     | NA            |
| 1082 | (0.00179,0.00386] | (0.00665,Inf]     | NA         | (0,0.731]     | (0.798,1.72]  |
| 1083 | (0.00179,0.00386] | NA                | NA         | (0,0.731]     | NA            |
| 1084 | NA                | NA                | NA         | (1.11,Inf]    | NA            |
| 1085 | (0.00179,0.00386] | (0.00665,Inf]     | NA         | (0.936,1.11]  | (1.72,Inf]    |
| 1086 | (0.00875,Inf]     | (0.00665,Inf]     | (0,0.46]   | (0.936,1.11]  | (0.798,1.72]  |
| 1087 | (0,0.00179]       | (0.00125,0.00292] | NA         | (1.11,Inf]    | (1.72,Inf]    |
| 1088 | (0.00875,Inf]     | (0.00292,0.00665] | NA         | (0.936,1.11]  | (0.213,0.798] |
| 1089 | (0.00875,Inf]     | (0.00665,Inf]     | (0,0.46]   | (1.11,Inf]    | (0.798,1.72]  |
| 1090 | (0.00179,0.00386] | (0.00665,Inf]     | NA         | (0.936,1.11]  | (1.72,Inf]    |
| 1091 | (0.00875,Inf]     | (0.00665,Inf]     | NA         | (0.731,0.936] | (0.213,0.798] |
| 1092 | (0,0.00179]       | NA                | NA         | (0,0.731]     | NA            |
| 1093 | (0.00875,Inf]     | (0.00665,Inf]     | NA         | (0.731,0.936] | (0.213,0.798] |
| 1094 | (0.00386,0.00875] | NA                | NA         | (0.936,1.11]  | NA            |
| 1095 | NA                | (0.00292,0.00665] | NA         | (1.11,Inf]    | (1.72,Inf]    |
| 1096 | (0,0.00179]       | NA                | NA         | (0,0.731]     | NA            |
| 1097 | (0.00875,Inf]     | (0.00125,0.00292] | (0.46,Inf] | (0,0.731]     | (0,0.213]     |
| 1098 | (0.00386,0.00875] | (0,0.00125]       | NA         | (0.731,0.936] | (0,0.213]     |

|      |                   |                   |            |               |               |
|------|-------------------|-------------------|------------|---------------|---------------|
| 1099 | (0.00875,Inf]     | (0.00665,Inf]     | (0.46,Inf] | (1.11,Inf]    | (0.798,1.72]  |
| 1100 | NA                | (0.00665,Inf]     | NA         | (0,0.731]     | (1.72,Inf]    |
| 1101 | (0.00875,Inf]     | (0.00665,Inf]     | NA         | (0.936,1.11]  | (0.798,1.72]  |
| 1102 | (0.00875,Inf]     | (0.00292,0.00665] | NA         | (0,0.731]     | (0.213,0.798] |
| 1103 | (0.00875,Inf]     | NA                | NA         | (1.11,Inf]    | NA            |
| 1104 | (0.00875,Inf]     | (0.00125,0.00292] | NA         | (0.731,0.936] | (0,0.213]     |
| 1105 | (0.00386,0.00875] | (0.00125,0.00292] | NA         | (0.936,1.11]  | (0.213,0.798] |
| 1106 | (0.00386,0.00875] | (0.00292,0.00665] | NA         | (0.936,1.11]  | (0.798,1.72]  |
| 1107 | (0.00386,0.00875] | (0.00665,Inf]     | NA         | (0.731,0.936] | (1.72,Inf]    |
| 1108 | (0.00875,Inf]     | (0.00665,Inf]     | NA         | (1.11,Inf]    | (0.213,0.798] |
| 1109 | (0.00386,0.00875] | NA                | NA         | (0.936,1.11]  | NA            |
| 1110 | (0.00875,Inf]     | (0.00665,Inf]     | NA         | (1.11,Inf]    | (0.213,0.798] |
| 1111 | (0.00875,Inf]     | NA                | NA         | (0.936,1.11]  | NA            |
| 1112 | (0,0.00179]       | (0,0.00125]       | NA         | (1.11,Inf]    | (1.72,Inf]    |
| 1113 | NA                | (0,0.00125]       | NA         | (0.936,1.11]  | (1.72,Inf]    |
| 1114 | (0.00179,0.00386] | (0.00665,Inf]     | NA         | (0.731,0.936] | (1.72,Inf]    |
| 1115 | NA                | (0.00292,0.00665] | NA         | (0,0.731]     | (1.72,Inf]    |
| 1116 | (0,0.00179]       | (0,0.00125]       | NA         | (0,0.731]     | (0.213,0.798] |
| 1117 | (0.00875,Inf]     | NA                | NA         | (0.731,0.936] | NA            |
| 1118 | NA                | (0,0.00125]       | NA         | (0.731,0.936] | (1.72,Inf]    |
| 1119 | (0.00875,Inf]     | (0,0.00125]       | NA         | (0.731,0.936] | (0,0.213]     |
| 1120 | NA                | (0.00665,Inf]     | NA         | (1.11,Inf]    | (1.72,Inf]    |
| 1121 | (0.00875,Inf]     | (0.00665,Inf]     | (0.46,Inf] | (0.731,0.936] | (0.213,0.798] |
| 1122 | (0,0.00179]       | (0.00292,0.00665] | NA         | (0,0.731]     | (0.798,1.72]  |
| 1123 | (0.00875,Inf]     | (0.00292,0.00665] | NA         | (0,0.731]     | (0,0.213]     |
| 1124 | NA                | NA                | NA         | (0.731,0.936] | NA            |
| 1125 | (0.00875,Inf]     | (0.00665,Inf]     | NA         | (1.11,Inf]    | (0.213,0.798] |
| 1126 | (0.00875,Inf]     | (0.00665,Inf]     | NA         | (1.11,Inf]    | (0.798,1.72]  |
| 1127 | NA                | NA                | (0,0.46]   | NA            | (0.798,1.72]  |
| 1128 | (0.00179,0.00386] | NA                | NA         | (0,0.731]     | NA            |
| 1129 | (0.00875,Inf]     | (0.00125,0.00292] | (0.46,Inf] | (1.11,Inf]    | (0,0.213]     |
| 1130 | NA                | NA                | NA         | (0.731,0.936] | NA            |
| 1131 | (0.00386,0.00875] | (0.00665,Inf]     | NA         | (1.11,Inf]    | (1.72,Inf]    |
| 1132 | (0.00875,Inf]     | (0.00292,0.00665] | NA         | (1.11,Inf]    | (0.213,0.798] |
| 1133 | (0.00179,0.00386] | NA                | NA         | (0.936,1.11]  | NA            |
| 1134 | NA                | NA                | NA         | (0.731,0.936] | NA            |
| 1135 | (0.00875,Inf]     | (0.00665,Inf]     | NA         | (0.731,0.936] | (0.213,0.798] |
| 1136 | (0,0.00179]       | (0.00292,0.00665] | NA         | (1.11,Inf]    | (1.72,Inf]    |

|      |                   |                   |            |               |               |
|------|-------------------|-------------------|------------|---------------|---------------|
| 1137 | NA                | (0.00125,0.00292] | NA         | (0.936,1.11]  | (1.72,Inf]    |
| 1138 | (0.00386,0.00875] | (0.00125,0.00292] | NA         | (0,0.731]     | (0,0.213]     |
| 1139 | (0.00179,0.00386] | (0.00292,0.00665] | NA         | (1.11,Inf]    | (0.798,1.72]  |
| 1140 | NA                | (0.00292,0.00665] | NA         | (0,0.731]     | (1.72,Inf]    |
| 1141 | (0.00875,Inf]     | (0.00665,Inf]     | NA         | (0,0.731]     | (0.213,0.798] |
| 1142 | (0.00179,0.00386] | NA                | NA         | (0,0.731]     | NA            |
| 1143 | (0.00875,Inf]     | (0.00665,Inf]     | NA         | (1.11,Inf]    | (1.72,Inf]    |
| 1144 | NA                | NA                | NA         | (1.11,Inf]    | NA            |
| 1145 | (0.00875,Inf]     | (0.00665,Inf]     | (0,0.46]   | (0.731,0.936] | (0.798,1.72]  |
| 1146 | (0.00386,0.00875] | (0.00125,0.00292] | NA         | (0.936,1.11]  | (0.213,0.798] |
| 1147 | (0.00386,0.00875] | (0.00665,Inf]     | NA         | (0.731,0.936] | (0.798,1.72]  |
| 1148 | (0.00875,Inf]     | (0.00665,Inf]     | (0.46,Inf] | (0.936,1.11]  | (0.213,0.798] |
| 1149 | NA                | (0.00125,0.00292] | NA         | (0.731,0.936] | (1.72,Inf]    |
| 1150 | (0.00386,0.00875] | (0.00125,0.00292] | NA         | (0,0.731]     | (0,0.213]     |
| 1151 | (0,0.00179]       | (0,0.00125]       | NA         | (0,0.731]     | (1.72,Inf]    |
| 1152 | (0.00386,0.00875] | (0.00292,0.00665] | NA         | (0,0.731]     | (0.213,0.798] |
| 1153 | (0.00386,0.00875] | NA                | NA         | (0.731,0.936] | NA            |
| 1154 | NA                | NA                | NA         | (0.936,1.11]  | NA            |
| 1155 | (0.00179,0.00386] | (0.00665,Inf]     | NA         | (0.731,0.936] | (0.798,1.72]  |
| 1156 | NA                | (0.00665,Inf]     | NA         | (0,0.731]     | (1.72,Inf]    |
| 1157 | (0.00386,0.00875] | NA                | NA         | (0.731,0.936] | NA            |
| 1158 | NA                | NA                | NA         | (0.936,1.11]  | NA            |
| 1159 | NA                | (0.00292,0.00665] | NA         | (0.936,1.11]  | (1.72,Inf]    |
| 1160 | (0.00875,Inf]     | NA                | NA         | (1.11,Inf]    | NA            |
| 1161 | NA                | (0.00665,Inf]     | NA         | (0,0.731]     | (1.72,Inf]    |
| 1162 | NA                | NA                | NA         | (0.936,1.11]  | NA            |
| 1163 | (0.00386,0.00875] | (0.00292,0.00665] | NA         | (0,0.731]     | (0.213,0.798] |
| 1164 | (0.00179,0.00386] | NA                | NA         | (0,0.731]     | NA            |
| 1165 | (0.00386,0.00875] | (0.00665,Inf]     | (0.46,Inf] | (0.731,0.936] | (0.798,1.72]  |
| 1166 | (0.00179,0.00386] | NA                | NA         | (0.731,0.936] | NA            |
| 1167 | NA                | NA                | NA         | (0,0.731]     | NA            |
| 1168 | (0.00875,Inf]     | NA                | NA         | (1.11,Inf]    | NA            |
| 1169 | (0,0.00179]       | (0,0.00125]       | NA         | (0.731,0.936] | (0.798,1.72]  |
| 1170 | (0.00386,0.00875] | (0.00665,Inf]     | (0.46,Inf] | (0,0.731]     | (0.798,1.72]  |
| 1171 | NA                | NA                | (0.46,Inf] | (0.936,1.11]  | NA            |
| 1172 | (0.00875,Inf]     | (0.00665,Inf]     | NA         | (0.731,0.936] | (0.798,1.72]  |
| 1173 | (0.00179,0.00386] | (0.00125,0.00292] | NA         | (0,0.731]     | (0.213,0.798] |
| 1174 | (0.00386,0.00875] | (0.00292,0.00665] | NA         | (1.11,Inf]    | (0.213,0.798] |

|      |                   |                   |            |               |               |
|------|-------------------|-------------------|------------|---------------|---------------|
| 1175 | NA                | NA                | NA         | (0,0.731]     | NA            |
| 1176 | (0.00179,0.00386] | NA                | NA         | (0,0.731]     | NA            |
| 1177 | (0.00875,Inf]     | NA                | NA         | (1.11,Inf]    | NA            |
| 1178 | (0.00179,0.00386] | (0.00125,0.00292] | NA         | (0.936,1.11]  | (0.213,0.798] |
| 1179 | NA                | NA                | NA         | (0.936,1.11]  | NA            |
| 1180 | (0.00179,0.00386] | (0.00665,Inf]     | NA         | (0,0.731]     | (1.72,Inf]    |
| 1181 | (0,0.00179]       | NA                | NA         | (0.731,0.936] | NA            |
| 1182 | (0.00386,0.00875] | (0.00665,Inf]     | NA         | (1.11,Inf]    | (0.798,1.72]  |
| 1183 | NA                | NA                | NA         | (0.936,1.11]  | NA            |
| 1184 | (0.00386,0.00875] | (0.00125,0.00292] | (0.46,Inf] | (0,0.731]     | (0,0.213]     |
| 1185 | NA                | NA                | NA         | (0,0.731]     | NA            |
| 1186 | (0.00386,0.00875] | (0.00292,0.00665] | NA         | (0.936,1.11]  | (0.798,1.72]  |
| 1187 | (0.00875,Inf]     | (0.00665,Inf]     | NA         | (0,0.731]     | (0.213,0.798] |
| 1188 | (0.00179,0.00386] | (0.00292,0.00665] | NA         | (0,0.731]     | (0.798,1.72]  |
| 1189 | NA                | NA                | NA         | (0,0.731]     | NA            |
| 1190 | (0.00875,Inf]     | NA                | NA         | (0,0.731]     | NA            |
| 1191 | NA                | (0.00125,0.00292] | NA         | (0.731,0.936] | (1.72,Inf]    |
| 1192 | NA                | NA                | NA         | (0,0.731]     | NA            |
| 1193 | (0.00875,Inf]     | (0.00125,0.00292] | NA         | (0,0.731]     | (0,0.213]     |
| 1194 | (0.00386,0.00875] | (0.00665,Inf]     | NA         | (0,0.731]     | (1.72,Inf]    |
| 1195 | NA                | (0.00125,0.00292] | NA         | (0.936,1.11]  | (1.72,Inf]    |
| 1196 | NA                | NA                | NA         | (0.936,1.11]  | NA            |
| 1197 | (0.00875,Inf]     | (0,0.00125]       | NA         | (0.936,1.11]  | (0,0.213]     |
| 1198 | NA                | NA                | NA         | NA            | (0.213,0.798] |
| 1199 | (0.00179,0.00386] | (0.00665,Inf]     | NA         | (0.731,0.936] | (1.72,Inf]    |
| 1200 | (0.00875,Inf]     | (0.00665,Inf]     | NA         | (1.11,Inf]    | (0.213,0.798] |
| 1201 | NA                | (0.00665,Inf]     | NA         | (0.731,0.936] | (1.72,Inf]    |
| 1202 | (0.00875,Inf]     | (0.00292,0.00665] | NA         | (1.11,Inf]    | (0.213,0.798] |
| 1203 | NA                | NA                | NA         | (1.11,Inf]    | NA            |
| 1204 | (0.00875,Inf]     | (0.00292,0.00665] | (0.46,Inf] | (0,0.731]     | (0.213,0.798] |
| 1205 | NA                | NA                | NA         | (0.731,0.936] | NA            |
| 1206 | (0.00875,Inf]     | (0.00665,Inf]     | (0,0.46]   | (1.11,Inf]    | (1.72,Inf]    |
| 1207 | (0.00875,Inf]     | (0.00665,Inf]     | NA         | (0,0.731]     | (0.213,0.798] |
| 1208 | (0.00875,Inf]     | (0.00665,Inf]     | NA         | (1.11,Inf]    | (0.798,1.72]  |
| 1209 | (0.00875,Inf]     | (0.00665,Inf]     | NA         | (1.11,Inf]    | (0.213,0.798] |
| 1210 | NA                | NA                | NA         | (0.731,0.936] | NA            |
| 1211 | NA                | NA                | NA         | (0.731,0.936] | NA            |
| 1212 | (0.00179,0.00386] | (0.00125,0.00292] | NA         | (0,0.731]     | (0.213,0.798] |



|      |                   |                   |    |               |               |
|------|-------------------|-------------------|----|---------------|---------------|
| 1213 | (0.00875,Inf]     | (0.00665,Inf]     | NA | (0.936,1.11]  | (1.72,Inf]    |
| 1214 | (0,0.00179]       | NA                | NA | (0,0.731]     | NA            |
| 1215 | (0.00875,Inf]     | (0.00665,Inf]     | NA | (0,0.731]     | (0.213,0.798] |
| 1216 | (0.00875,Inf]     | NA                | NA | (0,0.731]     | NA            |
| 1217 | NA                | NA                | NA | (0,0.731]     | NA            |
| 1218 | (0.00875,Inf]     | (0.00292,0.00665] | NA | (1.11,Inf]    | (0,0.213]     |
| 1219 | (0.00179,0.00386] | (0.00292,0.00665] | NA | (0.936,1.11]  | (0.798,1.72]  |
| 1220 | (0.00875,Inf]     | NA                | NA | (0.731,0.936] | NA            |
| 1221 | (0.00386,0.00875] | (0.00665,Inf]     | NA | (0,0.731]     | (0.213,0.798] |
| 1222 | (0.00386,0.00875] | (0.00292,0.00665] | NA | (1.11,Inf]    | (0.213,0.798] |
| 1223 | (0.00386,0.00875] | (0.00665,Inf]     | NA | (0,0.731]     | (1.72,Inf]    |
| 1224 | (0.00875,Inf]     | (0.00665,Inf]     | NA | (0.936,1.11]  | (0.213,0.798] |
| 1225 | (0.00386,0.00875] | NA                | NA | (0.936,1.11]  | NA            |
| 1226 | (0.00386,0.00875] | NA                | NA | (1.11,Inf]    | NA            |
| 1227 | NA                | NA                | NA | NA            | (0.798,1.72]  |
| 1228 | NA                | NA                | NA | (0,0.731]     | NA            |
| 1229 | (0.00179,0.00386] | NA                | NA | (0.936,1.11]  | NA            |
| 1230 | NA                | (0.00125,0.00292] | NA | (1.11,Inf]    | (1.72,Inf]    |
| 1231 | (0.00386,0.00875] | (0.00125,0.00292] | NA | (0.936,1.11]  | (0.213,0.798] |
| 1232 | NA                | NA                | NA | (0.731,0.936] | NA            |
| 1233 | NA                | NA                | NA | (0.731,0.936] | NA            |
| 1234 | NA                | NA                | NA | (1.11,Inf]    | NA            |
| 1235 | (0.00386,0.00875] | NA                | NA | (0.731,0.936] | NA            |
| 1236 | NA                | (0.00125,0.00292] | NA | (0,0.731]     | (1.72,Inf]    |
| 1237 | (0.00875,Inf]     | NA                | NA | (1.11,Inf]    | NA            |
| 1238 | (0.00386,0.00875] | (0.00292,0.00665] | NA | (1.11,Inf]    | (0.213,0.798] |
| 1239 | (0.00386,0.00875] | NA                | NA | (0.731,0.936] | NA            |
| 1240 | (0.00179,0.00386] | (0.00125,0.00292] | NA | (0,0.731]     | (0.213,0.798] |
| 1241 | (0.00875,Inf]     | (0.00665,Inf]     | NA | (0.936,1.11]  | (0.798,1.72]  |
| 1242 | (0.00875,Inf]     | (0.00665,Inf]     | NA | (0.936,1.11]  | (1.72,Inf]    |
| 1243 | (0.00386,0.00875] | (0.00292,0.00665] | NA | (0.936,1.11]  | (0.213,0.798] |
| 1244 | (0.00386,0.00875] | NA                | NA | (0.731,0.936] | NA            |
| 1245 | (0.00386,0.00875] | (0.00292,0.00665] | NA | (0,0.731]     | (0.213,0.798] |
| 1246 | (0.00386,0.00875] | (0.00292,0.00665] | NA | (1.11,Inf]    | (0.798,1.72]  |
| 1247 | (0,0.00179]       | NA                | NA | (0.936,1.11]  | NA            |
| 1248 | (0,0.00179]       | (0.00292,0.00665] | NA | (0,0.731]     | (1.72,Inf]    |
| 1249 | NA                | NA                | NA | (0,0.731]     | NA            |
| 1250 | NA                | NA                | NA | (0,0.731]     | NA            |

|      |                   |                   |            |               |               |
|------|-------------------|-------------------|------------|---------------|---------------|
| 1251 | (0.00179,0.00386] | (0.00125,0.00292] | NA         | (0,0.731]     | (0.213,0.798] |
| 1252 | NA                | NA                | NA         | (0.731,0.936] | NA            |
| 1253 | (0.00386,0.00875] | (0.00125,0.00292] | NA         | (0.731,0.936] | (0.213,0.798] |
| 1254 | (0.00179,0.00386] | (0,0.00125]       | (0.46,Inf] | (0.936,1.11]  | (0.213,0.798] |
| 1255 | (0.00179,0.00386] | (0.00125,0.00292] | (0.46,Inf] | (1.11,Inf]    | (0.798,1.72]  |
| 1256 | (0.00179,0.00386] | (0.00665,Inf]     | (0.46,Inf] | (0,0.731]     | (1.72,Inf]    |
| 1257 | (0.00386,0.00875] | (0.00665,Inf]     | NA         | (1.11,Inf]    | (1.72,Inf]    |
| 1258 | NA                | NA                | NA         | (0.731,0.936] | NA            |
| 1259 | (0.00386,0.00875] | NA                | NA         | (0,0.731]     | NA            |
| 1260 | (0.00386,0.00875] | (0.00292,0.00665] | NA         | (0,0.731]     | (0.213,0.798] |
| 1261 | (0.00386,0.00875] | (0.00665,Inf]     | NA         | (0,0.731]     | (1.72,Inf]    |
| 1262 | (0.00875,Inf]     | (0.00125,0.00292] | NA         | (1.11,Inf]    | (0,0.213]     |
| 1263 | (0.00386,0.00875] | NA                | NA         | (0.731,0.936] | NA            |
| 1264 | NA                | NA                | NA         | (0.731,0.936] | NA            |
| 1265 | (0.00179,0.00386] | (0.00665,Inf]     | NA         | (0,0.731]     | (0.798,1.72]  |
| 1266 | (0.00179,0.00386] | (0.00125,0.00292] | NA         | (0.731,0.936] | (0.213,0.798] |
| 1267 | (0,0.00179]       | (0,0.00125]       | NA         | (0,0.731]     | (0.798,1.72]  |
| 1268 | (0.00386,0.00875] | (0.00665,Inf]     | NA         | (0,0.731]     | (0,0.213]     |
| 1269 | (0.00386,0.00875] | (0.00292,0.00665] | NA         | (0,0.731]     | (0.213,0.798] |
| 1270 | (0.00875,Inf]     | NA                | NA         | (1.11,Inf]    | NA            |
| 1271 | (0.00179,0.00386] | (0.00292,0.00665] | NA         | (0,0.731]     | (0.213,0.798] |
| 1272 | (0.00875,Inf]     | (0.00665,Inf]     | NA         | (0.936,1.11]  | (0.213,0.798] |
| 1273 | (0.00386,0.00875] | (0.00665,Inf]     | NA         | (0,0.731]     | (0.798,1.72]  |
| 1274 | (0.00386,0.00875] | (0.00665,Inf]     | (0.46,Inf] | (0,0.731]     | (0.213,0.798] |
| 1275 | NA                | NA                | NA         | (0.731,0.936] | NA            |
| 1276 | (0.00875,Inf]     | (0.00665,Inf]     | NA         | (0.731,0.936] | (0.213,0.798] |
| 1277 | (0.00875,Inf]     | NA                | NA         | (0,0.731]     | NA            |
| 1278 | NA                | NA                | NA         | (1.11,Inf]    | NA            |
| 1279 | (0.00386,0.00875] | (0.00292,0.00665] | NA         | (0,0.731]     | (0.213,0.798] |
| 1280 | (0,0.00179]       | (0.00665,Inf]     | NA         | (1.11,Inf]    | (1.72,Inf]    |
| 1281 | (0.00386,0.00875] | NA                | NA         | (0.731,0.936] | NA            |
| 1282 | NA                | (0,0.00125]       | NA         | (0.936,1.11]  | (1.72,Inf]    |
| 1283 | (0.00875,Inf]     | (0,0.00125]       | NA         | (1.11,Inf]    | (0,0.213]     |
| 1284 | NA                | NA                | NA         | (1.11,Inf]    | NA            |
| 1285 | (0.00386,0.00875] | NA                | NA         | (1.11,Inf]    | NA            |
| 1286 | NA                | (0.00125,0.00292] | NA         | (1.11,Inf]    | (1.72,Inf]    |
| 1287 | (0.00875,Inf]     | (0.00665,Inf]     | NA         | (0.731,0.936] | (0.213,0.798] |
| 1288 | (0.00386,0.00875] | (0,0.00125]       | NA         | (0,0.731]     | (0,0.213]     |

|      |                   |                   |            |               |               |
|------|-------------------|-------------------|------------|---------------|---------------|
| 1289 | (0.00386,0.00875] | (0.00665,Inf]     | NA         | (0,0.731]     | (0.798,1.72]  |
| 1290 | (0.00875,Inf]     | (0.00292,0.00665] | NA         | (0.731,0.936] | (0,0.213]     |
| 1291 | (0.00386,0.00875] | NA                | (0.46,Inf] | (0,0.731]     | NA            |
| 1292 | (0.00179,0.00386] | (0.00665,Inf]     | NA         | (0.731,0.936] | (1.72,Inf]    |
| 1293 | (0.00386,0.00875] | NA                | NA         | (0,0.731]     | NA            |
| 1294 | (0.00875,Inf]     | (0.00125,0.00292] | NA         | (1.11,Inf]    | (0,0.213]     |
| 1295 | (0.00875,Inf]     | (0.00292,0.00665] | NA         | (0.936,1.11]  | (0.213,0.798] |
| 1296 | NA                | NA                | NA         | (0,0.731]     | NA            |
| 1297 | NA                | (0.00125,0.00292] | NA         | (0.936,1.11]  | (1.72,Inf]    |
| 1298 | (0.00875,Inf]     | NA                | NA         | (1.11,Inf]    | NA            |
| 1299 | (0.00386,0.00875] | (0.00665,Inf]     | NA         | (0,0.731]     | (0.213,0.798] |
| 1300 | (0.00875,Inf]     | NA                | NA         | (0,0.731]     | NA            |
| 1301 | NA                | NA                | NA         | (0.731,0.936] | NA            |
| 1302 | (0.00386,0.00875] | (0.00292,0.00665] | NA         | (0.731,0.936] | (0.213,0.798] |
| 1303 | (0.00875,Inf]     | (0.00665,Inf]     | (0.46,Inf] | (1.11,Inf]    | (0.798,1.72]  |
| 1304 | NA                | NA                | NA         | (0,0.731]     | NA            |
| 1305 | NA                | (0.00125,0.00292] | NA         | (0,0.731]     | (1.72,Inf]    |
| 1306 | (0,0.00179]       | NA                | NA         | (0.936,1.11]  | NA            |
| 1307 | NA                | NA                | NA         | (0.936,1.11]  | NA            |
| 1308 | (0.00386,0.00875] | (0.00292,0.00665] | NA         | (1.11,Inf]    | (0.798,1.72]  |
| 1309 | NA                | NA                | NA         | (0,0.731]     | NA            |
| 1310 | (0.00386,0.00875] | (0.00292,0.00665] | NA         | (1.11,Inf]    | (0.798,1.72]  |
| 1311 | (0.00875,Inf]     | (0.00665,Inf]     | NA         | (0.731,0.936] | (1.72,Inf]    |
| 1312 | (0.00875,Inf]     | (0.00665,Inf]     | NA         | (0.731,0.936] | (0.798,1.72]  |
| 1313 | (0.00875,Inf]     | (0.00665,Inf]     | NA         | (0.731,0.936] | (0.213,0.798] |
| 1314 | (0.00386,0.00875] | (0.00292,0.00665] | NA         | (1.11,Inf]    | (0.798,1.72]  |
| 1315 | NA                | NA                | NA         | (1.11,Inf]    | NA            |
| 1316 | (0.00875,Inf]     | (0.00665,Inf]     | NA         | (0,0.731]     | (0.213,0.798] |
| 1317 | (0.00386,0.00875] | (0.00125,0.00292] | NA         | (0.731,0.936] | (0,0.213]     |
| 1318 | NA                | NA                | NA         | (0,0.731]     | NA            |
| 1319 | (0.00386,0.00875] | NA                | NA         | (0,0.731]     | NA            |
| 1320 | NA                | NA                | NA         | (0.936,1.11]  | NA            |
| 1321 | NA                | NA                | NA         | (0,0.731]     | NA            |
| 1322 | NA                | NA                | NA         | (0,0.731]     | NA            |
| 1323 | NA                | NA                | NA         | (0,0.731]     | NA            |
| 1324 | NA                | NA                | NA         | (0.936,1.11]  | NA            |
| 1325 | (0.00875,Inf]     | NA                | NA         | (1.11,Inf]    | NA            |
| 1326 | NA                | (0.00125,0.00292] | NA         | (0,0.731]     | (1.72,Inf]    |

|      |                   |                   |            |               |               |
|------|-------------------|-------------------|------------|---------------|---------------|
| 1327 | (0.00875,Inf]     | NA                | NA         | (1.11,Inf]    | NA            |
| 1328 | (0.00386,0.00875] | NA                | NA         | (0.731,0.936] | NA            |
| 1329 | NA                | NA                | (0.46,Inf] | (1.11,Inf]    | NA            |
| 1330 | NA                | NA                | (0.46,Inf] | NA            | NA            |
| 1331 | NA                | NA                | NA         | (0.731,0.936] | NA            |
| 1332 | NA                | NA                | NA         | (0.731,0.936] | NA            |
| 1333 | (0.00386,0.00875] | (0.00665,Inf]     | NA         | (0,0.731]     | (0.798,1.72]  |
| 1334 | NA                | NA                | NA         | (0,0.731]     | NA            |
| 1335 | NA                | (0.00665,Inf]     | NA         | (1.11,Inf]    | (1.72,Inf]    |
| 1336 | (0.00875,Inf]     | (0.00665,Inf]     | NA         | (0,0.731]     | (0.213,0.798] |
| 1337 | (0.00875,Inf]     | NA                | NA         | (0.731,0.936] | NA            |
| 1338 | (0.00875,Inf]     | (0.00665,Inf]     | NA         | (1.11,Inf]    | (0.798,1.72]  |
| 1339 | (0,0.00179]       | (0,0.00125]       | NA         | (0,0.731]     | (0.798,1.72]  |
| 1340 | (0.00179,0.00386] | (0.00665,Inf]     | (0.46,Inf] | (0,0.731]     | (0.798,1.72]  |
| 1341 | NA                | NA                | NA         | (1.11,Inf]    | NA            |
| 1342 | (0.00179,0.00386] | NA                | NA         | (1.11,Inf]    | NA            |
| 1343 | NA                | NA                | NA         | (0.731,0.936] | NA            |
| 1344 | (0.00386,0.00875] | NA                | NA         | (0,0.731]     | NA            |
| 1345 | (0,0.00179]       | (0.00125,0.00292] | NA         | (0.731,0.936] | (0.213,0.798] |
| 1346 | NA                | NA                | NA         | (0,0.731]     | NA            |
| 1347 | NA                | NA                | NA         | (1.11,Inf]    | NA            |
| 1348 | (0,0.00179]       | (0.00665,Inf]     | NA         | (0,0.731]     | (1.72,Inf]    |
| 1349 | (0.00875,Inf]     | (0.00665,Inf]     | NA         | (1.11,Inf]    | (0.798,1.72]  |
| 1350 | NA                | (0.00665,Inf]     | NA         | (1.11,Inf]    | (1.72,Inf]    |
| 1351 | (0.00386,0.00875] | (0.00292,0.00665] | (0.46,Inf] | (0,0.731]     | (0.213,0.798] |
| 1352 | (0.00875,Inf]     | (0.00665,Inf]     | NA         | (1.11,Inf]    | (0.798,1.72]  |
| 1353 | (0.00386,0.00875] | (0.00292,0.00665] | NA         | (0,0.731]     | (0.213,0.798] |
| 1354 | (0.00875,Inf]     | (0.00665,Inf]     | NA         | (0.936,1.11]  | (0.798,1.72]  |
| 1355 | NA                | NA                | (0.46,Inf] | (0.936,1.11]  | NA            |
| 1356 | (0.00875,Inf]     | NA                | NA         | (1.11,Inf]    | NA            |
| 1357 | (0.00875,Inf]     | (0.00125,0.00292] | NA         | (0.731,0.936] | (0,0.213]     |
| 1358 | NA                | NA                | NA         | (0,0.731]     | NA            |
| 1359 | (0.00386,0.00875] | NA                | NA         | (1.11,Inf]    | NA            |
| 1360 | (0.00386,0.00875] | (0,0.00125]       | NA         | (0.731,0.936] | (0.213,0.798] |
| 1361 | (0.00179,0.00386] | NA                | NA         | (1.11,Inf]    | NA            |
| 1362 | (0.00875,Inf]     | (0.00125,0.00292] | (0.46,Inf] | (0.731,0.936] | (0,0.213]     |
| 1363 | (0.00386,0.00875] | (0.00292,0.00665] | NA         | (0.936,1.11]  | (0.213,0.798] |
| 1364 | (0.00875,Inf]     | (0.00292,0.00665] | NA         | (0.731,0.936] | (0.213,0.798] |

|      |                   |                   |            |               |               |
|------|-------------------|-------------------|------------|---------------|---------------|
| 1365 | NA                | NA                | NA         | (0,0.731]     | NA            |
| 1366 | NA                | NA                | NA         | (0,0.731]     | NA            |
| 1367 | (0.00875,Inf]     | (0.00292,0.00665] | NA         | (1.11,Inf]    | (0.213,0.798] |
| 1368 | (0.00875,Inf]     | (0.00665,Inf]     | NA         | (0.936,1.11]  | (0.798,1.72]  |
| 1369 | (0.00875,Inf]     | (0.00665,Inf]     | NA         | (1.11,Inf]    | (1.72,Inf]    |
| 1370 | (0.00875,Inf]     | (0.00125,0.00292] | NA         | (1.11,Inf]    | (0.213,0.798] |
| 1371 | (0.00875,Inf]     | (0.00665,Inf]     | NA         | (0,0.731]     | (0.213,0.798] |
| 1372 | (0.00875,Inf]     | (0.00665,Inf]     | NA         | (0,0.731]     | (0.213,0.798] |
| 1373 | NA                | NA                | NA         | (0.731,0.936] | NA            |
| 1374 | NA                | NA                | NA         | (1.11,Inf]    | NA            |
| 1375 | (0.00875,Inf]     | NA                | NA         | (0,0.731]     | NA            |
| 1376 | (0.00386,0.00875] | (0.00665,Inf]     | (0,0.46]   | (1.11,Inf]    | (0.798,1.72]  |
| 1377 | NA                | NA                | NA         | (0,0.731]     | NA            |
| 1378 | NA                | NA                | NA         | (0,0.731]     | NA            |
| 1379 | (0.00875,Inf]     | NA                | (0.46,Inf] | (0,0.731]     | NA            |
| 1380 | (0.00386,0.00875] | (0.00125,0.00292] | (0.46,Inf] | (0,0.731]     | (0,0.213]     |
| 1381 | (0.00386,0.00875] | NA                | NA         | (1.11,Inf]    | NA            |
| 1382 | (0.00386,0.00875] | (0.00665,Inf]     | NA         | (0.936,1.11]  | (1.72,Inf]    |
| 1383 | NA                | NA                | (0.46,Inf] | (0,0.731]     | NA            |
| 1384 | (0.00386,0.00875] | NA                | (0.46,Inf] | (0,0.731]     | NA            |
| 1385 | (0.00386,0.00875] | (0,0.00125]       | NA         | (0.936,1.11]  | (0,0.213]     |
| 1386 | (0.00875,Inf]     | NA                | NA         | (0,0.731]     | NA            |
| 1387 | (0.00875,Inf]     | (0.00292,0.00665] | NA         | (0.731,0.936] | (0,0.213]     |
| 1388 | NA                | (0.00292,0.00665] | NA         | (0,0.731]     | (1.72,Inf]    |
| 1389 | NA                | NA                | NA         | (0.731,0.936] | NA            |
| 1390 | (0.00386,0.00875] | (0.00292,0.00665] | NA         | (0.936,1.11]  | (0.213,0.798] |
| 1391 | (0.00179,0.00386] | (0.00292,0.00665] | NA         | (0,0.731]     | (0.798,1.72]  |
| 1392 | (0.00875,Inf]     | NA                | (0.46,Inf] | (1.11,Inf]    | NA            |
| 1393 | (0.00386,0.00875] | (0.00665,Inf]     | NA         | (1.11,Inf]    | (0.798,1.72]  |
| 1394 | (0.00386,0.00875] | (0.00665,Inf]     | (0.46,Inf] | (0,0.731]     | (0.798,1.72]  |
| 1395 | (0,0.00179]       | NA                | (0.46,Inf] | (0.936,1.11]  | NA            |
| 1396 | (0.00875,Inf]     | (0.00125,0.00292] | NA         | (1.11,Inf]    | (0.213,0.798] |
| 1397 | (0.00875,Inf]     | (0.00665,Inf]     | NA         | (0,0.731]     | (0.213,0.798] |
| 1398 | NA                | NA                | NA         | (0,0.731]     | NA            |
| 1399 | (0.00386,0.00875] | (0.00292,0.00665] | NA         | (0.936,1.11]  | (0.798,1.72]  |
| 1400 | (0.00875,Inf]     | (0.00665,Inf]     | (0.46,Inf] | (0,0.731]     | (0.213,0.798] |
| 1401 | (0,0.00179]       | (0.00125,0.00292] | (0.46,Inf] | (0,0.731]     | (1.72,Inf]    |
| 1402 | NA                | (0.00665,Inf]     | NA         | (0.731,0.936] | (1.72,Inf]    |

|      |                   |                   |            |               |               |
|------|-------------------|-------------------|------------|---------------|---------------|
| 1403 | (0.00386,0.00875] | (0.00665,Inf]     | NA         | (0,0.731]     | (0.213,0.798] |
| 1404 | (0.00875,Inf]     | (0.00292,0.00665] | NA         | (0.936,1.11]  | (0.213,0.798] |
| 1405 | (0.00386,0.00875] | (0.00292,0.00665] | NA         | (0.731,0.936] | (0.213,0.798] |
| 1406 | (0.00179,0.00386] | (0.00292,0.00665] | NA         | (0.731,0.936] | (0.798,1.72]  |
| 1407 | (0.00875,Inf]     | (0.00125,0.00292] | NA         | (1.11,Inf]    | (0,0.213]     |
| 1408 | (0.00875,Inf]     | NA                | NA         | (1.11,Inf]    | NA            |
| 1409 | (0.00179,0.00386] | (0.00665,Inf]     | NA         | (0,0.731]     | (1.72,Inf]    |
| 1410 | (0.00386,0.00875] | (0.00665,Inf]     | NA         | (0,0.731]     | (0.798,1.72]  |
| 1411 | NA                | NA                | NA         | (0,0.731]     | NA            |
| 1412 | NA                | NA                | NA         | (0.731,0.936] | NA            |
| 1413 | (0.00875,Inf]     | (0.00292,0.00665] | (0,0.46]   | (1.11,Inf]    | (0.213,0.798] |
| 1414 | NA                | NA                | NA         | (0,0.731]     | NA            |
| 1415 | (0.00875,Inf]     | (0.00665,Inf]     | NA         | (1.11,Inf]    | (0.213,0.798] |
| 1416 | (0.00875,Inf]     | NA                | NA         | (1.11,Inf]    | NA            |
| 1417 | (0.00875,Inf]     | (0.00665,Inf]     | NA         | (1.11,Inf]    | (0.213,0.798] |
| 1418 | (0.00875,Inf]     | (0.00125,0.00292] | NA         | (0,0.731]     | (0.213,0.798] |
| 1419 | NA                | NA                | NA         | (0,0.731]     | NA            |
| 1420 | (0.00179,0.00386] | (0.00665,Inf]     | NA         | (0.731,0.936] | (1.72,Inf]    |
| 1421 | (0.00875,Inf]     | NA                | NA         | (1.11,Inf]    | NA            |
| 1422 | NA                | (0,0.00125]       | NA         | (0.936,1.11]  | (1.72,Inf]    |
| 1423 | (0.00875,Inf]     | NA                | NA         | (0.936,1.11]  | NA            |
| 1424 | NA                | NA                | NA         | NA            | (0.213,0.798] |
| 1425 | (0.00179,0.00386] | (0.00125,0.00292] | NA         | (0.936,1.11]  | (0.213,0.798] |
| 1426 | NA                | NA                | NA         | (0.731,0.936] | NA            |
| 1427 | NA                | NA                | NA         | (0,0.731]     | NA            |
| 1428 | NA                | NA                | (0.46,Inf] | (0.936,1.11]  | NA            |
| 1429 | NA                | NA                | NA         | (1.11,Inf]    | NA            |
| 1430 | NA                | NA                | NA         | (0.731,0.936] | NA            |
| 1431 | (0.00875,Inf]     | NA                | NA         | (0.936,1.11]  | NA            |
| 1432 | (0.00875,Inf]     | NA                | NA         | (0.731,0.936] | NA            |
| 1433 | NA                | NA                | NA         | (1.11,Inf]    | NA            |
| 1434 | NA                | (0.00125,0.00292] | NA         | (1.11,Inf]    | (1.72,Inf]    |
| 1435 | NA                | NA                | NA         | (0,0.731]     | NA            |
| 1436 | (0.00386,0.00875] | (0.00292,0.00665] | NA         | (0,0.731]     | (0.213,0.798] |
| 1437 | (0,0.00179]       | (0.00292,0.00665] | NA         | (0,0.731]     | (1.72,Inf]    |
| 1438 | (0.00179,0.00386] | (0.00665,Inf]     | NA         | (0,0.731]     | (1.72,Inf]    |
| 1439 | NA                | NA                | NA         | (0,0.731]     | NA            |
| 1440 | NA                | (0.00665,Inf]     | NA         | (0.731,0.936] | (1.72,Inf]    |

|      |                   |                   |            |               |               |
|------|-------------------|-------------------|------------|---------------|---------------|
| 1441 | (0.00875,Inf]     | NA                | NA         | (0.731,0.936] | NA            |
| 1442 | (0.00875,Inf]     | (0.00292,0.00665] | NA         | (1.11,Inf]    | (0,0.213]     |
| 1443 | NA                | (0.00292,0.00665] | NA         | (0,0.731]     | (1.72,Inf]    |
| 1444 | (0.00875,Inf]     | (0.00125,0.00292] | NA         | (0.731,0.936] | (0,0.213]     |
| 1445 | NA                | NA                | NA         | (0,0.731]     | NA            |
| 1446 | (0.00386,0.00875] | NA                | NA         | (0,0.731]     | NA            |
| 1447 | (0.00875,Inf]     | NA                | (0.46,Inf] | (0,0.731]     | NA            |
| 1448 | (0.00875,Inf]     | (0.00665,Inf]     | (0,0.46]   | (0.731,0.936] | (0.213,0.798] |
| 1449 | (0.00179,0.00386] | NA                | NA         | (0.731,0.936] | NA            |
| 1450 | NA                | NA                | NA         | (0.731,0.936] | NA            |
| 1451 | NA                | NA                | NA         | (0.731,0.936] | NA            |
| 1452 | (0.00386,0.00875] | (0,0.00125]       | NA         | (0.936,1.11]  | (0,0.213]     |
| 1453 | (0.00875,Inf]     | NA                | NA         | (0,0.731]     | NA            |
| 1454 | (0.00875,Inf]     | (0.00292,0.00665] | NA         | (0.936,1.11]  | (0,0.213]     |
| 1455 | NA                | (0.00292,0.00665] | NA         | (0.936,1.11]  | (1.72,Inf]    |
| 1456 | NA                | (0.00292,0.00665] | NA         | (0,0.731]     | (1.72,Inf]    |
| 1457 | NA                | NA                | NA         | (0,0.731]     | NA            |
| 1458 | NA                | NA                | NA         | (1.11,Inf]    | NA            |
| 1459 | (0.00386,0.00875] | (0,0.00125]       | NA         | (1.11,Inf]    | (0,0.213]     |
| 1460 | (0.00875,Inf]     | (0.00665,Inf]     | NA         | (0.731,0.936] | (0.213,0.798] |
| 1461 | (0.00875,Inf]     | (0.00665,Inf]     | NA         | (0,0.731]     | (0,0.213]     |
| 1462 | NA                | NA                | NA         | (0,0.731]     | NA            |
| 1463 | (0.00875,Inf]     | (0.00292,0.00665] | NA         | (1.11,Inf]    | (0.213,0.798] |
| 1464 | (0.00875,Inf]     | (0.00665,Inf]     | NA         | (0.731,0.936] | (0.213,0.798] |
| 1465 | (0.00875,Inf]     | NA                | NA         | (1.11,Inf]    | NA            |
| 1466 | (0.00179,0.00386] | (0.00665,Inf]     | NA         | (0,0.731]     | (0.798,1.72]  |
| 1467 | (0.00875,Inf]     | (0.00292,0.00665] | NA         | (0.936,1.11]  | (0.213,0.798] |
| 1468 | NA                | NA                | NA         | (0.731,0.936] | NA            |
| 1469 | (0.00875,Inf]     | (0.00665,Inf]     | (0.46,Inf] | (1.11,Inf]    | (0.798,1.72]  |
| 1470 | (0.00386,0.00875] | (0.00292,0.00665] | NA         | (0.731,0.936] | (0.213,0.798] |
| 1471 | (0.00386,0.00875] | (0.00665,Inf]     | NA         | (0,0.731]     | (0.798,1.72]  |
| 1472 | NA                | NA                | NA         | (1.11,Inf]    | NA            |
| 1473 | NA                | NA                | (0.46,Inf] | NA            | NA            |
| 1474 | NA                | NA                | NA         | (0.731,0.936] | NA            |
| 1475 | (0,0.00179]       | (0.00665,Inf]     | NA         | (0,0.731]     | (1.72,Inf]    |
| 1476 | NA                | (0.00292,0.00665] | NA         | (0.936,1.11]  | (1.72,Inf]    |
| 1477 | NA                | NA                | NA         | (0,0.731]     | NA            |
| 1478 | (0.00875,Inf]     | NA                | NA         | (1.11,Inf]    | NA            |

|      |                   |                   |            |               |               |
|------|-------------------|-------------------|------------|---------------|---------------|
| 1479 | (0.00386,0.00875] | (0.00665,Inf]     | NA         | (0,0.731]     | (1.72,Inf]    |
| 1480 | (0.00875,Inf]     | (0.00665,Inf]     | NA         | (0.731,0.936] | (0.213,0.798] |
| 1481 | (0.00875,Inf]     | (0.00665,Inf]     | NA         | (0,0.731]     | (0.798,1.72]  |
| 1482 | NA                | NA                | NA         | (0.936,1.11]  | NA            |
| 1483 | NA                | (0.00292,0.00665] | NA         | (0,0.731]     | (1.72,Inf]    |
| 1484 | (0.00386,0.00875] | (0.00665,Inf]     | NA         | (1.11,Inf]    | (0.798,1.72]  |
| 1485 | (0.00875,Inf]     | NA                | NA         | (0.936,1.11]  | NA            |
| 1486 | (0.00875,Inf]     | (0.00665,Inf]     | NA         | (1.11,Inf]    | (0.798,1.72]  |
| 1487 | NA                | NA                | NA         | (0.731,0.936] | NA            |
| 1488 | (0.00875,Inf]     | (0.00665,Inf]     | NA         | (0.936,1.11]  | (0.798,1.72]  |
| 1489 | (0.00875,Inf]     | (0.00665,Inf]     | NA         | (1.11,Inf]    | (0.798,1.72]  |
| 1490 | (0.00875,Inf]     | (0.00665,Inf]     | (0,0.46]   | (0,0.731]     | (0.798,1.72]  |
| 1491 | (0.00875,Inf]     | (0.00665,Inf]     | NA         | (1.11,Inf]    | (0.798,1.72]  |
| 1492 | NA                | (0.00292,0.00665] | NA         | (1.11,Inf]    | (1.72,Inf]    |
| 1493 | (0.00179,0.00386] | (0.00292,0.00665] | NA         | (0.936,1.11]  | (0.798,1.72]  |
| 1494 | NA                | NA                | NA         | (1.11,Inf]    | NA            |
| 1495 | (0,0.00179]       | (0.00292,0.00665] | NA         | (1.11,Inf]    | (1.72,Inf]    |
| 1496 | (0.00179,0.00386] | (0.00665,Inf]     | NA         | (0.731,0.936] | (1.72,Inf]    |
| 1497 | NA                | (0.00665,Inf]     | NA         | (0,0.731]     | (1.72,Inf]    |
| 1498 | (0.00875,Inf]     | (0.00292,0.00665] | NA         | (1.11,Inf]    | (0.213,0.798] |
| 1499 | (0.00875,Inf]     | (0.00665,Inf]     | NA         | (1.11,Inf]    | (0.213,0.798] |
| 1500 | (0.00875,Inf]     | (0.00665,Inf]     | NA         | (0,0.731]     | (0.213,0.798] |
| 1501 | (0.00875,Inf]     | (0.00665,Inf]     | (0.46,Inf] | (0,0.731]     | (1.72,Inf]    |
| 1502 | (0.00875,Inf]     | (0.00125,0.00292] | NA         | (1.11,Inf]    | (0.213,0.798] |
| 1503 | (0.00875,Inf]     | (0.00665,Inf]     | (0.46,Inf] | (1.11,Inf]    | (0.213,0.798] |
| 1504 | (0.00386,0.00875] | (0.00125,0.00292] | NA         | (0.936,1.11]  | (0.213,0.798] |
| 1505 | (0.00875,Inf]     | NA                | NA         | (0.936,1.11]  | NA            |
| 1506 | NA                | NA                | NA         | (1.11,Inf]    | NA            |
| 1507 | (0.00875,Inf]     | (0.00125,0.00292] | NA         | (1.11,Inf]    | (0.213,0.798] |
| 1508 | (0.00386,0.00875] | (0.00665,Inf]     | NA         | (0.731,0.936] | (1.72,Inf]    |
| 1509 | NA                | NA                | NA         | (0,0.731]     | NA            |
| 1510 | (0.00179,0.00386] | (0.00125,0.00292] | NA         | (1.11,Inf]    | (0.798,1.72]  |
| 1511 | (0.00875,Inf]     | NA                | NA         | (0.936,1.11]  | NA            |
| 1512 | (0.00875,Inf]     | (0.00665,Inf]     | NA         | (1.11,Inf]    | (0.798,1.72]  |
| 1513 | (0.00179,0.00386] | (0.00292,0.00665] | NA         | (1.11,Inf]    | (0.798,1.72]  |
| 1514 | NA                | (0.00292,0.00665] | NA         | (0.731,0.936] | (1.72,Inf]    |
| 1515 | NA                | NA                | NA         | (0.731,0.936] | NA            |
| 1516 | (0.00875,Inf]     | (0,0.00125]       | NA         | (1.11,Inf]    | (0,0.213]     |



|      |                   |                   |            |               |               |
|------|-------------------|-------------------|------------|---------------|---------------|
| 1517 | (0.00386,0.00875] | (0.00665,Inf]     | NA         | (0,0.731]     | (0.213,0.798] |
| 1518 | NA                | (0.00665,Inf]     | NA         | (0,0.731]     | (1.72,Inf]    |
| 1519 | NA                | NA                | NA         | (0.731,0.936] | NA            |
| 1520 | (0.00386,0.00875] | NA                | NA         | (1.11,Inf]    | NA            |
| 1521 | (0.00179,0.00386] | (0.00292,0.00665] | (0.46,Inf] | (0.731,0.936] | (0.798,1.72]  |
| 1522 | (0.00875,Inf]     | NA                | NA         | (0,0.731]     | NA            |
| 1523 | (0.00875,Inf]     | NA                | NA         | (1.11,Inf]    | NA            |
| 1524 | NA                | NA                | NA         | (0.936,1.11]  | NA            |
| 1525 | NA                | (0.00665,Inf]     | NA         | (1.11,Inf]    | (1.72,Inf]    |
| 1526 | (0.00875,Inf]     | (0.00292,0.00665] | NA         | (1.11,Inf]    | (0,0.213]     |
| 1527 | NA                | NA                | NA         | (0.731,0.936] | NA            |
| 1528 | (0.00875,Inf]     | (0.00665,Inf]     | NA         | (0.936,1.11]  | (0.213,0.798] |
| 1529 | (0.00875,Inf]     | (0.00292,0.00665] | NA         | (0,0.731]     | (0,0.213]     |
| 1530 | NA                | NA                | NA         | NA            | NA            |
| 1531 | NA                | NA                | NA         | (0.731,0.936] | NA            |
| 1532 | NA                | NA                | NA         | (0.731,0.936] | NA            |
| 1533 | NA                | NA                | NA         | (0,0.731]     | NA            |
| 1534 | (0.00386,0.00875] | (0.00292,0.00665] | NA         | (0,0.731]     | (0.213,0.798] |
| 1535 | NA                | NA                | NA         | (0.936,1.11]  | NA            |
| 1536 | (0.00875,Inf]     | (0.00665,Inf]     | NA         | (0,0.731]     | (0.798,1.72]  |
| 1537 | (0.00875,Inf]     | (0.00665,Inf]     | NA         | (0.936,1.11]  | (0.213,0.798] |
| 1538 | NA                | NA                | NA         | (1.11,Inf]    | NA            |
| 1539 | NA                | NA                | NA         | (1.11,Inf]    | NA            |
| 1540 | (0.00179,0.00386] | (0.00665,Inf]     | NA         | (0.731,0.936] | (1.72,Inf]    |
| 1541 | NA                | (0.00292,0.00665] | NA         | (0,0.731]     | (1.72,Inf]    |
| 1542 | NA                | NA                | NA         | (0,0.731]     | NA            |
| 1543 | (0.00875,Inf]     | NA                | NA         | (0.731,0.936] | NA            |
| 1544 | (0.00875,Inf]     | (0.00665,Inf]     | NA         | (0.731,0.936] | (0.213,0.798] |
| 1545 | (0.00179,0.00386] | (0.00665,Inf]     | NA         | (0,0.731]     | (1.72,Inf]    |
| 1546 | NA                | NA                | (0.46,Inf] | (0,0.731]     | NA            |
| 1547 | (0.00386,0.00875] | (0.00665,Inf]     | (0.46,Inf] | (0,0.731]     | (1.72,Inf]    |
| 1548 | (0.00386,0.00875] | (0.00292,0.00665] | NA         | (0,0.731]     | (0.213,0.798] |
| 1549 | NA                | (0.00665,Inf]     | NA         | (1.11,Inf]    | (1.72,Inf]    |
| 1550 | NA                | NA                | NA         | (0.731,0.936] | NA            |
| 1551 | NA                | NA                | NA         | (1.11,Inf]    | NA            |
| 1552 | (0.00875,Inf]     | (0.00665,Inf]     | NA         | (1.11,Inf]    | (1.72,Inf]    |
| 1553 | NA                | NA                | NA         | (0.731,0.936] | NA            |
| 1554 | (0.00875,Inf]     | (0.00665,Inf]     | NA         | (0,0.731]     | (0.213,0.798] |

|      |                   |                   |            |               |               |
|------|-------------------|-------------------|------------|---------------|---------------|
| 1555 | (0.00179,0.00386] | NA                | NA         | (0,0.731]     | NA            |
| 1556 | (0.00875,Inf]     | (0.00665,Inf]     | NA         | (0,0.731]     | (0.213,0.798] |
| 1557 | NA                | NA                | NA         | NA            | (1.72,Inf]    |
| 1558 | (0.00386,0.00875] | (0.00665,Inf]     | NA         | (0,0.731]     | (0.798,1.72]  |
| 1559 | NA                | NA                | NA         | (1.11,Inf]    | NA            |
| 1560 | NA                | NA                | NA         | (0.731,0.936] | NA            |
| 1561 | NA                | NA                | NA         | (0.731,0.936] | NA            |
| 1562 | NA                | NA                | NA         | (0,0.731]     | NA            |
| 1563 | NA                | NA                | NA         | (0.936,1.11]  | NA            |
| 1564 | NA                | NA                | NA         | (0,0.731]     | NA            |
| 1565 | NA                | NA                | NA         | (0.731,0.936] | NA            |
| 1566 | NA                | NA                | (0.46,Inf] | NA            | (0.213,0.798] |
| 1567 | (0,0.00179]       | NA                | NA         | (0,0.731]     | NA            |
| 1568 | NA                | (0.00665,Inf]     | NA         | (0,0.731]     | (1.72,Inf]    |
| 1569 | (0.00875,Inf]     | (0.00665,Inf]     | NA         | (0.731,0.936] | (0.213,0.798] |
| 1570 | NA                | NA                | NA         | (0,0.731]     | NA            |
| 1571 | NA                | NA                | NA         | (0.731,0.936] | NA            |
| 1572 | (0,0.00179]       | NA                | NA         | (0,0.731]     | NA            |
| 1573 | NA                | NA                | NA         | (0,0.731]     | NA            |
| 1574 | NA                | NA                | NA         | (0,0.731]     | NA            |
| 1575 | NA                | NA                | NA         | (0.936,1.11]  | NA            |
| 1576 | NA                | NA                | NA         | (1.11,Inf]    | NA            |
| 1577 | (0.00875,Inf]     | NA                | NA         | (0.731,0.936] | NA            |
| 1578 | NA                | NA                | (0.46,Inf] | (1.11,Inf]    | NA            |
| 1579 | (0.00875,Inf]     | (0.00125,0.00292] | (0.46,Inf] | (0.936,1.11]  | (0,0.213]     |
| 1580 | NA                | NA                | NA         | (0,0.731]     | NA            |
| 1581 | NA                | NA                | NA         | (0,0.731]     | NA            |
| 1582 | (0.00875,Inf]     | (0.00665,Inf]     | (0.46,Inf] | (0,0.731]     | (0.213,0.798] |
| 1583 | (0.00875,Inf]     | (0.00665,Inf]     | NA         | (0.936,1.11]  | (0.213,0.798] |
| 1584 | (0.00875,Inf]     | (0.00292,0.00665] | NA         | (0,0.731]     | (0.213,0.798] |
| 1585 | (0.00179,0.00386] | (0.00292,0.00665] | NA         | (0,0.731]     | (0.798,1.72]  |
| 1586 | (0.00179,0.00386] | (0.00665,Inf]     | NA         | (0.936,1.11]  | (1.72,Inf]    |
| 1587 | NA                | NA                | NA         | (0,0.731]     | NA            |
| 1588 | NA                | NA                | NA         | (0,0.731]     | NA            |
| 1589 | (0.00875,Inf]     | NA                | NA         | (1.11,Inf]    | NA            |
| 1590 | NA                | NA                | NA         | (0.731,0.936] | NA            |
| 1591 | NA                | NA                | NA         | (0.731,0.936] | NA            |
| 1592 | NA                | (0.00125,0.00292] | NA         | (1.11,Inf]    | (1.72,Inf]    |

|      |                   |                   |            |               |               |
|------|-------------------|-------------------|------------|---------------|---------------|
| 1593 | NA                | NA                | NA         | (1.11,Inf]    | NA            |
| 1594 | (0.00875,Inf]     | NA                | (0.46,Inf] | (0.731,0.936] | NA            |
| 1595 | (0.00875,Inf]     | (0.00665,Inf]     | NA         | (0,0.731]     | (0.798,1.72]  |
| 1596 | NA                | (0.00125,0.00292] | NA         | (1.11,Inf]    | (1.72,Inf]    |
| 1597 | (0.00875,Inf]     | (0.00665,Inf]     | NA         | (0,0.731]     | (0.213,0.798] |
| 1598 | (0.00875,Inf]     | (0.00665,Inf]     | NA         | (0,0.731]     | (0.798,1.72]  |
| 1599 | (0.00875,Inf]     | (0.00665,Inf]     | NA         | (1.11,Inf]    | (1.72,Inf]    |
| 1600 | NA                | NA                | NA         | (0,0.731]     | NA            |
| 1601 | NA                | NA                | NA         | (0,0.731]     | NA            |
| 1602 | (0.00875,Inf]     | (0.00665,Inf]     | (0.46,Inf] | (0.936,1.11]  | (0.213,0.798] |
| 1603 | (0.00875,Inf]     | NA                | NA         | (0,0.731]     | NA            |
| 1604 | NA                | (0.00125,0.00292] | NA         | (1.11,Inf]    | (1.72,Inf]    |
| 1605 | (0.00386,0.00875] | NA                | NA         | (1.11,Inf]    | NA            |
| 1606 | NA                | NA                | NA         | (0,0.731]     | NA            |
| 1607 | NA                | (0.00292,0.00665] | NA         | (0,0.731]     | (1.72,Inf]    |
| 1608 | NA                | NA                | NA         | (0,0.731]     | NA            |
| 1609 | NA                | NA                | NA         | (1.11,Inf]    | NA            |
| 1610 | (0.00875,Inf]     | (0.00665,Inf]     | NA         | (0,0.731]     | (0.798,1.72]  |
| 1611 | NA                | NA                | NA         | (0.936,1.11]  | NA            |
| 1612 | (0.00386,0.00875] | (0.00665,Inf]     | NA         | (0,0.731]     | (1.72,Inf]    |
| 1613 | NA                | (0.00665,Inf]     | NA         | (0,0.731]     | (1.72,Inf]    |
| 1614 | NA                | NA                | NA         | (0,0.731]     | NA            |
| 1615 | (0.00875,Inf]     | NA                | NA         | (0,0.731]     | NA            |
| 1616 | NA                | (0.00665,Inf]     | NA         | (0.731,0.936] | (1.72,Inf]    |
| 1617 | (0.00875,Inf]     | (0.00665,Inf]     | NA         | (0,0.731]     | (0.798,1.72]  |
| 1618 | (0.00386,0.00875] | (0.00125,0.00292] | NA         | (1.11,Inf]    | (0.213,0.798] |
| 1619 | NA                | NA                | NA         | (0.936,1.11]  | NA            |
| 1620 | (0.00386,0.00875] | (0.00665,Inf]     | NA         | (1.11,Inf]    | (1.72,Inf]    |
| 1621 | (0.00875,Inf]     | (0.00125,0.00292] | NA         | (1.11,Inf]    | (0.213,0.798] |
| 1622 | (0.00875,Inf]     | (0.00665,Inf]     | (0.46,Inf] | (0,0.731]     | (0.213,0.798] |
| 1623 | NA                | (0.00665,Inf]     | NA         | (0.936,1.11]  | (1.72,Inf]    |
| 1624 | NA                | NA                | (0.46,Inf] | (1.11,Inf]    | NA            |
| 1625 | NA                | NA                | NA         | (1.11,Inf]    | NA            |
| 1626 | NA                | NA                | NA         | (1.11,Inf]    | NA            |
| 1627 | NA                | NA                | NA         | (0,0.731]     | NA            |
| 1628 | NA                | NA                | NA         | (0.936,1.11]  | NA            |
| 1629 | (0.00875,Inf]     | (0.00665,Inf]     | NA         | (0,0.731]     | (0.798,1.72]  |
| 1630 | NA                | NA                | NA         | (0.936,1.11]  | NA            |

|      |                   |                   |            |               |               |
|------|-------------------|-------------------|------------|---------------|---------------|
| 1631 | (0.00875,Inf]     | (0.00665,Inf]     | NA         | (0,0.731]     | (0.213,0.798] |
| 1632 | (0.00875,Inf]     | NA                | NA         | (0,0.731]     | NA            |
| 1633 | (0.00875,Inf]     | NA                | NA         | (0,0.731]     | NA            |
| 1634 | NA                | NA                | NA         | (0,0.731]     | NA            |
| 1635 | (0.00875,Inf]     | NA                | (0.46,Inf] | (1.11,Inf]    | NA            |
| 1636 | NA                | NA                | NA         | (1.11,Inf]    | NA            |
| 1637 | NA                | (0.00665,Inf]     | NA         | (0,0.731]     | (1.72,Inf]    |
| 1638 | NA                | NA                | NA         | (1.11,Inf]    | NA            |
| 1639 | (0.00179,0.00386] | (0.00665,Inf]     | NA         | (0.731,0.936] | (1.72,Inf]    |
| 1640 | NA                | NA                | NA         | (1.11,Inf]    | NA            |
| 1641 | (0.00386,0.00875] | (0.00665,Inf]     | NA         | (0,0.731]     | (0.213,0.798] |
| 1642 | NA                | (0.00665,Inf]     | NA         | (0,0.731]     | (1.72,Inf]    |
| 1643 | (0.00875,Inf]     | NA                | NA         | (0,0.731]     | NA            |
| 1644 | (0.00875,Inf]     | NA                | (0.46,Inf] | (1.11,Inf]    | NA            |
| 1645 | (0.00875,Inf]     | (0.00125,0.00292] | NA         | (0,0.731]     | (0,0.213]     |
| 1646 | (0.00875,Inf]     | (0.00665,Inf]     | (0.46,Inf] | (1.11,Inf]    | (1.72,Inf]    |
| 1647 | NA                | NA                | NA         | (0,0.731]     | NA            |
| 1648 | NA                | NA                | NA         | (0,0.731]     | NA            |
| 1649 | (0.00875,Inf]     | (0.00665,Inf]     | NA         | (1.11,Inf]    | (0.213,0.798] |
| 1650 | NA                | NA                | NA         | (0.731,0.936] | NA            |
| 1651 | (0.00386,0.00875] | (0.00292,0.00665] | NA         | (0,0.731]     | (0.213,0.798] |
| 1652 | (0.00875,Inf]     | (0.00665,Inf]     | NA         | (0,0.731]     | (0.213,0.798] |
| 1653 | NA                | NA                | NA         | (0.731,0.936] | NA            |
| 1654 | (0.00386,0.00875] | NA                | NA         | (0.936,1.11]  | NA            |
| 1655 | NA                | NA                | NA         | (1.11,Inf]    | NA            |
| 1656 | (0.00875,Inf]     | (0.00665,Inf]     | NA         | (1.11,Inf]    | (0.798,1.72]  |
| 1657 | NA                | NA                | NA         | (0,0.731]     | NA            |
| 1658 | (0.00386,0.00875] | NA                | NA         | (1.11,Inf]    | NA            |
| 1659 | (0.00875,Inf]     | (0.00665,Inf]     | NA         | (0.731,0.936] | (0.213,0.798] |
| 1660 | (0.00875,Inf]     | (0.00292,0.00665] | (0.46,Inf] | (0.936,1.11]  | (0.213,0.798] |
| 1661 | NA                | (0.00665,Inf]     | NA         | (1.11,Inf]    | (1.72,Inf]    |
| 1662 | (0.00875,Inf]     | NA                | NA         | (0,0.731]     | NA            |
| 1663 | NA                | (0.00125,0.00292] | NA         | (0.731,0.936] | (1.72,Inf]    |
| 1664 | (0.00875,Inf]     | (0.00665,Inf]     | NA         | (0,0.731]     | (0.798,1.72]  |
| 1665 | (0.00875,Inf]     | NA                | NA         | (1.11,Inf]    | NA            |
| 1666 | NA                | NA                | NA         | (0,0.731]     | NA            |
| 1667 | (0.00386,0.00875] | (0.00665,Inf]     | NA         | (1.11,Inf]    | (1.72,Inf]    |
| 1668 | (0.00179,0.00386] | (0.00665,Inf]     | NA         | (0.936,1.11]  | (1.72,Inf]    |

|      |                   |                   |            |               |               |
|------|-------------------|-------------------|------------|---------------|---------------|
| 1669 | NA                | NA                | NA         | (1.11,Inf]    | NA            |
| 1670 | NA                | NA                | NA         | (0,0.731]     | NA            |
| 1671 | (0.00386,0.00875] | NA                | NA         | (0,0.731]     | NA            |
| 1672 | (0.00875,Inf]     | (0.00665,Inf]     | NA         | (0.731,0.936] | (0,0.213]     |
| 1673 | (0.00875,Inf]     | (0.00665,Inf]     | NA         | (1.11,Inf]    | (0.798,1.72]  |
| 1674 | NA                | NA                | NA         | (0,0.731]     | NA            |
| 1675 | NA                | (0.00665,Inf]     | NA         | (0.731,0.936] | (1.72,Inf]    |
| 1676 | NA                | NA                | NA         | (1.11,Inf]    | NA            |
| 1677 | (0.00386,0.00875] | (0.00292,0.00665] | NA         | (0.936,1.11]  | (0.213,0.798] |
| 1678 | NA                | NA                | NA         | (0,0.731]     | NA            |
| 1679 | (0.00875,Inf]     | NA                | NA         | (0.731,0.936] | NA            |
| 1680 | NA                | NA                | NA         | (0,0.731]     | NA            |
| 1681 | NA                | NA                | NA         | (0,0.731]     | NA            |
| 1682 | NA                | (0.00125,0.00292] | NA         | (1.11,Inf]    | (1.72,Inf]    |
| 1683 | (0.00875,Inf]     | NA                | NA         | (0.936,1.11]  | NA            |
| 1684 | (0,0.00179]       | (0.00665,Inf]     | NA         | (0.731,0.936] | (1.72,Inf]    |
| 1685 | (0.00875,Inf]     | (0.00665,Inf]     | NA         | (0,0.731]     | (0.213,0.798] |
| 1686 | NA                | (0.00665,Inf]     | NA         | (0,0.731]     | (1.72,Inf]    |
| 1687 | NA                | NA                | NA         | (0,0.731]     | NA            |
| 1688 | NA                | NA                | (0.46,Inf] | (0,0.731]     | NA            |
| 1689 | NA                | NA                | NA         | (0,0.731]     | NA            |
| 1690 | (0.00875,Inf]     | NA                | NA         | (1.11,Inf]    | NA            |
| 1691 | (0.00875,Inf]     | (0.00665,Inf]     | NA         | (0,0.731]     | (0.798,1.72]  |
| 1692 | (0.00386,0.00875] | (0.00292,0.00665] | NA         | (0,0.731]     | (0.213,0.798] |
| 1693 | NA                | (0.00665,Inf]     | NA         | (0.731,0.936] | (1.72,Inf]    |
| 1694 | (0.00875,Inf]     | (0.00665,Inf]     | (0.46,Inf] | (0,0.731]     | (1.72,Inf]    |
| 1695 | (0.00875,Inf]     | (0.00665,Inf]     | (0.46,Inf] | (1.11,Inf]    | (1.72,Inf]    |
| 1696 | NA                | (0.00292,0.00665] | (0.46,Inf] | (0.731,0.936] | (1.72,Inf]    |
| 1697 | NA                | NA                | NA         | (1.11,Inf]    | NA            |
| 1698 | NA                | (0.00665,Inf]     | NA         | (0,0.731]     | (1.72,Inf]    |
| 1699 | (0.00875,Inf]     | (0.00665,Inf]     | NA         | (0,0.731]     | (0.213,0.798] |
| 1700 | (0.00179,0.00386] | (0.00292,0.00665] | NA         | (1.11,Inf]    | (1.72,Inf]    |
| 1701 | (0.00875,Inf]     | NA                | NA         | (0,0.731]     | NA            |
| 1702 | NA                | NA                | NA         | (0,0.731]     | NA            |
| 1703 | NA                | NA                | NA         | (0.731,0.936] | NA            |
| 1704 | (0.00386,0.00875] | (0.00665,Inf]     | NA         | (0,0.731]     | (1.72,Inf]    |
| 1705 | (0.00875,Inf]     | (0.00665,Inf]     | NA         | (1.11,Inf]    | (0.213,0.798] |
| 1706 | NA                | (0.00125,0.00292] | NA         | (1.11,Inf]    | (1.72,Inf]    |

|      |                   |                   |            |               |               |
|------|-------------------|-------------------|------------|---------------|---------------|
| 1707 | (0.00875,Inf]     | (0.00292,0.00665] | NA         | (1.11,Inf]    | (0.213,0.798] |
| 1708 | (0.00875,Inf]     | (0.00292,0.00665] | NA         | (1.11,Inf]    | (0,0.213]     |
| 1709 | (0.00386,0.00875] | NA                | NA         | (0,0.731]     | NA            |
| 1710 | (0.00875,Inf]     | (0.00665,Inf]     | (0.46,Inf] | (1.11,Inf]    | (0.213,0.798] |
| 1711 | NA                | NA                | (0.46,Inf] | (0,0.731]     | NA            |
| 1712 | (0.00875,Inf]     | (0.00665,Inf]     | NA         | (0,0.731]     | (0.213,0.798] |
| 1713 | (0.00875,Inf]     | (0.00665,Inf]     | NA         | (1.11,Inf]    | (0.798,1.72]  |
| 1714 | NA                | NA                | NA         | (0.936,1.11]  | NA            |
| 1715 | NA                | NA                | NA         | (1.11,Inf]    | NA            |
| 1716 | (0.00875,Inf]     | NA                | NA         | (0,0.731]     | NA            |
| 1717 | NA                | (0.00665,Inf]     | NA         | (0,0.731]     | (1.72,Inf]    |
| 1718 | (0.00875,Inf]     | NA                | NA         | (1.11,Inf]    | NA            |
| 1719 | NA                | NA                | NA         | (0,0.731]     | NA            |
| 1720 | NA                | NA                | NA         | (1.11,Inf]    | NA            |
| 1721 | NA                | NA                | (0,0.46]   | NA            | (0.798,1.72]  |
| 1722 | (0.00875,Inf]     | (0.00665,Inf]     | NA         | (0,0.731]     | (0.213,0.798] |
| 1723 | (0.00875,Inf]     | (0.00665,Inf]     | NA         | (1.11,Inf]    | (0.213,0.798] |
| 1724 | (0.00386,0.00875] | NA                | NA         | (0,0.731]     | NA            |
| 1725 | (0.00875,Inf]     | (0.00125,0.00292] | NA         | (1.11,Inf]    | (0,0.213]     |
| 1726 | NA                | NA                | NA         | (1.11,Inf]    | NA            |
| 1727 | (0.00179,0.00386] | (0.00665,Inf]     | (0.46,Inf] | (0.936,1.11]  | (1.72,Inf]    |
| 1728 | NA                | NA                | NA         | NA            | (0.213,0.798] |
| 1729 | NA                | NA                | NA         | (0,0.731]     | NA            |
| 1730 | (0.00386,0.00875] | NA                | NA         | (0,0.731]     | NA            |
| 1731 | NA                | NA                | (0.46,Inf] | NA            | NA            |
| 1732 | NA                | NA                | (0.46,Inf] | NA            | NA            |
| 1733 | NA                | NA                | NA         | (1.11,Inf]    | NA            |
| 1734 | (0.00386,0.00875] | (0.00292,0.00665] | NA         | (0.731,0.936] | (0.213,0.798] |
| 1735 | (0.00875,Inf]     | (0.00665,Inf]     | NA         | (0.731,0.936] | (0.798,1.72]  |
| 1736 | NA                | NA                | (0.46,Inf] | (1.11,Inf]    | NA            |
| 1737 | NA                | NA                | NA         | (0.936,1.11]  | NA            |
| 1738 | (0.00875,Inf]     | (0.00665,Inf]     | NA         | (1.11,Inf]    | (0.213,0.798] |
| 1739 | (0.00875,Inf]     | NA                | NA         | (0,0.731]     | NA            |
| 1740 | (0.00875,Inf]     | (0.00665,Inf]     | NA         | (1.11,Inf]    | (0.213,0.798] |
| 1741 | (0.00875,Inf]     | NA                | NA         | (1.11,Inf]    | NA            |
| 1742 | (0.00875,Inf]     | (0.00665,Inf]     | NA         | (0,0.731]     | (0,0.213]     |
| 1743 | NA                | NA                | NA         | (0,0.731]     | NA            |
| 1744 | (0.00875,Inf]     | NA                | NA         | (1.11,Inf]    | NA            |

|      |                   |                   |            |               |               |
|------|-------------------|-------------------|------------|---------------|---------------|
| 1745 | NA                | NA                | NA         | (0,0.731]     | NA            |
| 1746 | NA                | NA                | NA         | (0.731,0.936] | NA            |
| 1747 | NA                | NA                | NA         | (0,0.731]     | NA            |
| 1748 | NA                | NA                | NA         | (0,0.731]     | NA            |
| 1749 | (0.00875,Inf]     | (0.00125,0.00292] | NA         | (1.11,Inf]    | (0.213,0.798] |
| 1750 | (0.00875,Inf]     | NA                | NA         | (1.11,Inf]    | NA            |
| 1751 | NA                | (0.00665,Inf]     | NA         | (0.731,0.936] | (1.72,Inf]    |
| 1752 | NA                | (0.00665,Inf]     | NA         | (0,0.731]     | (1.72,Inf]    |
| 1753 | NA                | (0.00665,Inf]     | NA         | (0,0.731]     | (1.72,Inf]    |
| 1754 | (0.00875,Inf]     | NA                | NA         | (1.11,Inf]    | NA            |
| 1755 | NA                | NA                | NA         | (0,0.731]     | NA            |
| 1756 | (0.00875,Inf]     | (0.00125,0.00292] | NA         | (1.11,Inf]    | (0,0.213]     |
| 1757 | NA                | NA                | NA         | (0.936,1.11]  | NA            |
| 1758 | NA                | NA                | NA         | (0,0.731]     | NA            |
| 1759 | NA                | NA                | NA         | (0,0.731]     | NA            |
| 1760 | (0.00179,0.00386] | (0.00665,Inf]     | (0,0.46]   | (0.731,0.936] | (1.72,Inf]    |
| 1761 | NA                | NA                | NA         | (0,0.731]     | NA            |
| 1762 | NA                | NA                | NA         | (0.936,1.11]  | NA            |
| 1763 | (0.00875,Inf]     | NA                | NA         | (0,0.731]     | NA            |
| 1764 | NA                | NA                | NA         | (0.936,1.11]  | NA            |
| 1765 | (0.00875,Inf]     | NA                | (0.46,Inf] | (0,0.731]     | NA            |
| 1766 | (0.00875,Inf]     | (0.00125,0.00292] | NA         | (1.11,Inf]    | (0,0.213]     |
| 1767 | NA                | NA                | NA         | (1.11,Inf]    | NA            |
| 1768 | NA                | NA                | NA         | (0.936,1.11]  | NA            |
| 1769 | NA                | NA                | NA         | (0,0.731]     | NA            |
| 1770 | (0.00875,Inf]     | NA                | NA         | (1.11,Inf]    | NA            |
| 1771 | NA                | NA                | NA         | (0,0.731]     | NA            |
| 1772 | (0.00875,Inf]     | (0.00665,Inf]     | (0.46,Inf] | (1.11,Inf]    | (0.213,0.798] |
| 1773 | (0.00875,Inf]     | (0.00665,Inf]     | (0,0.46]   | (1.11,Inf]    | (0.213,0.798] |
| 1774 | NA                | NA                | NA         | (0,0.731]     | NA            |
| 1775 | NA                | NA                | NA         | (0.731,0.936] | NA            |
| 1776 | NA                | NA                | NA         | (1.11,Inf]    | NA            |
| 1777 | (0.00386,0.00875] | NA                | NA         | (0,0.731]     | NA            |
| 1778 | NA                | NA                | NA         | (0,0.731]     | NA            |
| 1779 | (0.00875,Inf]     | NA                | NA         | (0,0.731]     | NA            |
| 1780 | (0.00875,Inf]     | (0.00665,Inf]     | NA         | (0.936,1.11]  | (0.213,0.798] |
| 1781 | NA                | NA                | NA         | NA            | (0.798,1.72]  |
| 1782 | NA                | NA                | NA         | (0,0.731]     | NA            |

|      |                   |                   |            |               |               |
|------|-------------------|-------------------|------------|---------------|---------------|
| 1783 | NA                | NA                | NA         | (0,0.731]     | NA            |
| 1784 | (0.00875,Inf]     | (0.00125,0.00292] | NA         | (1.11,Inf]    | (0,0.213]     |
| 1785 | NA                | (0.00665,Inf]     | NA         | (0.936,1.11]  | (1.72,Inf]    |
| 1786 | (0.00875,Inf]     | (0.00665,Inf]     | (0.46,Inf] | (0,0.731]     | (0.213,0.798] |
| 1787 | NA                | NA                | (0.46,Inf] | (0,0.731]     | NA            |
| 1788 | (0.00386,0.00875] | (0.00665,Inf]     | (0,0.46]   | (1.11,Inf]    | (1.72,Inf]    |
| 1789 | (0.00875,Inf]     | (0.00665,Inf]     | NA         | (0,0.731]     | (1.72,Inf]    |
| 1790 | NA                | NA                | NA         | (0,0.731]     | NA            |
| 1791 | (0.00875,Inf]     | (0.00665,Inf]     | NA         | (1.11,Inf]    | (1.72,Inf]    |
| 1792 | NA                | NA                | NA         | (1.11,Inf]    | NA            |
| 1793 | NA                | NA                | (0.46,Inf] | NA            | NA            |
| 1794 | NA                | NA                | (0.46,Inf] | NA            | NA            |
| 1795 | NA                | (0.00665,Inf]     | NA         | (1.11,Inf]    | (1.72,Inf]    |
| 1796 | NA                | NA                | NA         | (1.11,Inf]    | NA            |
| 1797 | NA                | NA                | NA         | (0.731,0.936] | NA            |
| 1798 | (0.00875,Inf]     | (0.00665,Inf]     | NA         | (1.11,Inf]    | (0.213,0.798] |
| 1799 | (0.00875,Inf]     | NA                | NA         | (1.11,Inf]    | NA            |
| 1800 | NA                | NA                | NA         | (0,0.731]     | NA            |
| 1801 | NA                | NA                | NA         | (1.11,Inf]    | NA            |
| 1802 | NA                | (0.00665,Inf]     | NA         | (0.731,0.936] | (1.72,Inf]    |
| 1803 | NA                | NA                | NA         | (1.11,Inf]    | NA            |
| 1804 | NA                | (0.00125,0.00292] | NA         | (1.11,Inf]    | (1.72,Inf]    |
| 1805 | (0.00875,Inf]     | (0.00665,Inf]     | (0,0.46]   | (0,0.731]     | (0.798,1.72]  |
| 1806 | (0,0.00179]       | NA                | NA         | (1.11,Inf]    | NA            |
| 1807 | NA                | NA                | NA         | (0.731,0.936] | NA            |
| 1808 | (0,0.00179]       | NA                | (0.46,Inf] | (0,0.731]     | NA            |
| 1809 | NA                | NA                | NA         | (1.11,Inf]    | NA            |
| 1810 | (0.00875,Inf]     | NA                | NA         | (0.936,1.11]  | NA            |
| 1811 | (0.00875,Inf]     | (0.00665,Inf]     | NA         | (0,0.731]     | (0,0.213]     |
| 1812 | NA                | NA                | NA         | (0.936,1.11]  | NA            |
| 1813 | NA                | NA                | NA         | NA            | NA            |
| 1814 | (0.00386,0.00875] | NA                | NA         | (0,0.731]     | NA            |
| 1815 | NA                | NA                | (0.46,Inf] | NA            | NA            |
| 1816 | NA                | NA                | NA         | (0.731,0.936] | NA            |
| 1817 | NA                | NA                | NA         | (0,0.731]     | NA            |
| 1818 | NA                | NA                | NA         | (0,0.731]     | NA            |
| 1819 | NA                | NA                | NA         | (0,0.731]     | NA            |
| 1820 | NA                | (0.00665,Inf]     | NA         | (0,0.731]     | (1.72,Inf]    |



|      |                   |                   |            |               |               |
|------|-------------------|-------------------|------------|---------------|---------------|
| 1821 | NA                | NA                | NA         | (0,0.731]     | NA            |
| 1822 | NA                | NA                | NA         | (1.11,Inf]    | NA            |
| 1823 | (0.00875,Inf]     | NA                | NA         | (1.11,Inf]    | NA            |
| 1824 | (0.00875,Inf]     | (0.00292,0.00665] | NA         | (1.11,Inf]    | (0.798,1.72]  |
| 1825 | NA                | NA                | NA         | (1.11,Inf]    | NA            |
| 1826 | (0.00875,Inf]     | (0.00665,Inf]     | NA         | (0.936,1.11]  | (0.798,1.72]  |
| 1827 | NA                | (0.00665,Inf]     | NA         | (0,0.731]     | (1.72,Inf]    |
| 1828 | (0.00875,Inf]     | NA                | NA         | (0,0.731]     | NA            |
| 1829 | NA                | NA                | NA         | (1.11,Inf]    | NA            |
| 1830 | (0.00875,Inf]     | (0.00665,Inf]     | NA         | (0,0.731]     | (0.798,1.72]  |
| 1831 | NA                | NA                | NA         | (0,0.731]     | NA            |
| 1832 | NA                | NA                | NA         | (0.936,1.11]  | NA            |
| 1833 | NA                | NA                | NA         | (0,0.731]     | NA            |
| 1834 | (0.00875,Inf]     | (0.00665,Inf]     | NA         | (0,0.731]     | (0.213,0.798] |
| 1835 | (0.00875,Inf]     | (0.00665,Inf]     | NA         | (1.11,Inf]    | (0.213,0.798] |
| 1836 | NA                | NA                | NA         | (0.731,0.936] | NA            |
| 1837 | NA                | (0.00665,Inf]     | NA         | (0.731,0.936] | (1.72,Inf]    |
| 1838 | NA                | NA                | NA         | (0,0.731]     | NA            |
| 1839 | NA                | NA                | NA         | (1.11,Inf]    | NA            |
| 1840 | (0.00875,Inf]     | (0.00665,Inf]     | NA         | (0,0.731]     | (0.798,1.72]  |
| 1841 | NA                | (0.00665,Inf]     | (0.46,Inf] | (0,0.731]     | (1.72,Inf]    |
| 1842 | (0.00875,Inf]     | NA                | NA         | (0,0.731]     | NA            |
| 1843 | NA                | NA                | (0.46,Inf] | NA            | NA            |
| 1844 | NA                | NA                | NA         | (0,0.731]     | NA            |
| 1845 | NA                | NA                | NA         | (0,0.731]     | NA            |
| 1846 | (0.00386,0.00875] | (0.00665,Inf]     | NA         | NA            | (0.213,0.798] |
| 1847 | NA                | NA                | NA         | (1.11,Inf]    | NA            |
| 1848 | NA                | NA                | NA         | NA            | NA            |
| 1849 | NA                | (0.00665,Inf]     | NA         | (0,0.731]     | (1.72,Inf]    |
| 1850 | NA                | NA                | NA         | (0.731,0.936] | NA            |
| 1851 | NA                | NA                | NA         | (1.11,Inf]    | NA            |
| 1852 | NA                | NA                | NA         | (1.11,Inf]    | NA            |
| 1853 | (0.00386,0.00875] | (0.00665,Inf]     | NA         | (0,0.731]     | (1.72,Inf]    |
| 1854 | (0.00875,Inf]     | NA                | NA         | (1.11,Inf]    | NA            |
| 1855 | NA                | NA                | (0.46,Inf] | (0,0.731]     | NA            |
| 1856 | NA                | NA                | NA         | (0,0.731]     | NA            |
| 1857 | NA                | (0.00665,Inf]     | NA         | (0,0.731]     | (1.72,Inf]    |
| 1858 | (0.00875,Inf]     | (0.00665,Inf]     | NA         | (1.11,Inf]    | (1.72,Inf]    |

|      |                   |               |            |               |               |
|------|-------------------|---------------|------------|---------------|---------------|
| 1859 | (0.00386,0.00875] | (0.00665,Inf] | NA         | (0,0.731]     | (0.798,1.72]  |
| 1860 | NA                | NA            | NA         | (0,0.731]     | NA            |
| 1861 | NA                | NA            | NA         | (1.11,Inf]    | NA            |
| 1862 | NA                | NA            | NA         | NA            | NA            |
| 1863 | NA                | NA            | NA         | (1.11,Inf]    | NA            |
| 1864 | (0.00875,Inf]     | (0.00665,Inf] | NA         | NA            | (1.72,Inf]    |
| 1865 | (0.00875,Inf]     | NA            | (0.46,Inf] | (0,0.731]     | NA            |
| 1866 | (0.00875,Inf]     | NA            | NA         | (0,0.731]     | NA            |
| 1867 | NA                | NA            | NA         | NA            | (0.798,1.72]  |
| 1868 | (0.00386,0.00875] | (0.00665,Inf] | NA         | (1.11,Inf]    | (1.72,Inf]    |
| 1869 | NA                | (0.00665,Inf] | NA         | (0,0.731]     | (1.72,Inf]    |
| 1870 | (0.00875,Inf]     | NA            | NA         | (0,0.731]     | NA            |
| 1871 | NA                | NA            | NA         | (0,0.731]     | NA            |
| 1872 | (0.00875,Inf]     | (0.00665,Inf] | NA         | (0.936,1.11]  | (0.213,0.798] |
| 1873 | (0.00875,Inf]     | NA            | NA         | (0,0.731]     | NA            |
| 1874 | NA                | (0.00665,Inf] | NA         | (1.11,Inf]    | (1.72,Inf]    |
| 1875 | (0.00875,Inf]     | (0.00665,Inf] | NA         | (1.11,Inf]    | (1.72,Inf]    |
| 1876 | NA                | NA            | NA         | (0.731,0.936] | NA            |
| 1877 | NA                | NA            | NA         | (1.11,Inf]    | NA            |
| 1878 | NA                | NA            | NA         | (0.731,0.936] | NA            |
| 1879 | (0.00386,0.00875] | NA            | NA         | (1.11,Inf]    | NA            |
| 1880 | NA                | NA            | NA         | (0,0.731]     | NA            |
| 1881 | NA                | NA            | NA         | NA            | NA            |
| 1882 | NA                | (0.00665,Inf] | NA         | (0,0.731]     | (1.72,Inf]    |
| 1883 | NA                | NA            | (0.46,Inf] | (0,0.731]     | NA            |
| 1884 | (0.00875,Inf]     | (0.00665,Inf] | NA         | (1.11,Inf]    | (0.213,0.798] |
| 1885 | (0.00875,Inf]     | NA            | NA         | (1.11,Inf]    | NA            |
| 1886 | NA                | NA            | NA         | (1.11,Inf]    | NA            |
| 1887 | NA                | NA            | NA         | (0,0.731]     | NA            |
| 1888 | NA                | NA            | NA         | (1.11,Inf]    | NA            |
| 1889 | (0.00875,Inf]     | (0.00665,Inf] | NA         | (0.936,1.11]  | (1.72,Inf]    |
| 1890 | (0.00875,Inf]     | (0.00665,Inf] | NA         | (1.11,Inf]    | (0.798,1.72]  |
| 1891 | NA                | NA            | NA         | (0,0.731]     | NA            |
| 1892 | NA                | NA            | NA         | (1.11,Inf]    | NA            |
| 1893 | (0.00875,Inf]     | NA            | NA         | (0.731,0.936] | NA            |
| 1894 | NA                | NA            | NA         | (0,0.731]     | NA            |
| 1895 | (0.00875,Inf]     | NA            | NA         | (0.731,0.936] | NA            |
| 1896 | NA                | NA            | NA         | (0,0.731]     | NA            |

|      |                   |               |            |               |               |
|------|-------------------|---------------|------------|---------------|---------------|
| 1897 | NA                | NA            | NA         | (0,0.731]     | NA            |
| 1898 | NA                | NA            | (0.46,Inf] | NA            | (0.798,1.72]  |
| 1899 | (0.00875,Inf]     | (0.00665,Inf] | NA         | (0,0.731]     | (0,0.213]     |
| 1900 | NA                | NA            | NA         | NA            | NA            |
| 1901 | NA                | NA            | NA         | (0,0.731]     | NA            |
| 1902 | NA                | NA            | NA         | (0,0.731]     | NA            |
| 1903 | (0.00875,Inf]     | (0.00665,Inf] | NA         | (0,0.731]     | (1.72,Inf]    |
| 1904 | NA                | (0.00665,Inf] | NA         | (0,0.731]     | (1.72,Inf]    |
| 1905 | (0.00875,Inf]     | NA            | NA         | (0,0.731]     | NA            |
| 1906 | NA                | NA            | NA         | (0,0.731]     | NA            |
| 1907 | NA                | NA            | NA         | (0.731,0.936] | NA            |
| 1908 | NA                | NA            | (0.46,Inf] | NA            | NA            |
| 1909 | NA                | NA            | NA         | (0,0.731]     | NA            |
| 1910 | NA                | NA            | NA         | (0.731,0.936] | NA            |
| 1911 | NA                | (0.00665,Inf] | NA         | (0,0.731]     | (1.72,Inf]    |
| 1912 | (0.00875,Inf]     | (0.00665,Inf] | NA         | (1.11,Inf]    | (0.798,1.72]  |
| 1913 | (0.00875,Inf]     | NA            | NA         | (1.11,Inf]    | NA            |
| 1914 | (0.00875,Inf]     | (0.00665,Inf] | (0.46,Inf] | (0,0.731]     | (0.213,0.798] |
| 1915 | NA                | (0.00665,Inf] | (0.46,Inf] | NA            | (1.72,Inf]    |
| 1916 | (0.00875,Inf]     | (0.00665,Inf] | NA         | (1.11,Inf]    | (0.213,0.798] |
| 1917 | NA                | NA            | (0.46,Inf] | (0.936,1.11]  | NA            |
| 1918 | NA                | (0.00665,Inf] | NA         | NA            | (1.72,Inf]    |
| 1919 | NA                | NA            | NA         | (0,0.731]     | NA            |
| 1920 | (0.00875,Inf]     | (0.00665,Inf] | NA         | NA            | (0.798,1.72]  |
| 1921 | (0.00875,Inf]     | (0.00665,Inf] | (0.46,Inf] | NA            | (0.213,0.798] |
| 1922 | NA                | NA            | (0.46,Inf] | (1.11,Inf]    | NA            |
| 1923 | NA                | NA            | NA         | NA            | NA            |
| 1924 | (0.00875,Inf]     | NA            | (0.46,Inf] | (1.11,Inf]    | NA            |
| 1925 | NA                | (0.00665,Inf] | NA         | (0.731,0.936] | (1.72,Inf]    |
| 1926 | (0.00875,Inf]     | (0.00665,Inf] | NA         | (1.11,Inf]    | (0,0.213]     |
| 1927 | NA                | NA            | (0.46,Inf] | NA            | NA            |
| 1928 | NA                | NA            | NA         | (0,0.731]     | NA            |
| 1929 | (0.00875,Inf]     | NA            | NA         | (1.11,Inf]    | NA            |
| 1930 | NA                | NA            | NA         | (0,0.731]     | NA            |
| 1931 | (0.00386,0.00875] | NA            | NA         | (0,0.731]     | NA            |
| 1932 | (0.00875,Inf]     | NA            | NA         | (1.11,Inf]    | NA            |
| 1933 | NA                | NA            | (0.46,Inf] | NA            | NA            |
| 1934 | (0.00875,Inf]     | (0.00665,Inf] | NA         | (1.11,Inf]    | (0.798,1.72]  |

|      |                   |                   |            |               |              |
|------|-------------------|-------------------|------------|---------------|--------------|
| 1935 | (0.00875,Inf]     | NA                | NA         | (1.11,Inf]    | NA           |
| 1936 | (0.00875,Inf]     | NA                | NA         | (0.731,0.936] | NA           |
| 1937 | (0.00179,0.00386] | (0.00665,Inf]     | (0.46,Inf] | (0,0.731]     | (1.72,Inf]   |
| 1938 | (0.00875,Inf]     | (0.00665,Inf]     | NA         | (0.936,1.11]  | (0.798,1.72] |
| 1939 | NA                | NA                | NA         | (0,0.731]     | NA           |
| 1940 | NA                | NA                | NA         | (0,0.731]     | NA           |
| 1941 | (0.00875,Inf]     | NA                | NA         | (1.11,Inf]    | NA           |
| 1942 | NA                | NA                | NA         | (1.11,Inf]    | NA           |
| 1943 | NA                | NA                | NA         | (0,0.731]     | NA           |
| 1944 | NA                | NA                | NA         | NA            | NA           |
| 1945 | NA                | NA                | NA         | (0,0.731]     | NA           |
| 1946 | NA                | NA                | (0.46,Inf] | NA            | NA           |
| 1947 | NA                | NA                | NA         | NA            | NA           |
| 1948 | NA                | NA                | NA         | (0,0.731]     | NA           |
| 1949 | NA                | (0.00665,Inf]     | NA         | (0.936,1.11]  | (1.72,Inf]   |
| 1950 | NA                | NA                | (0.46,Inf] | NA            | NA           |
| 1951 | (0.00875,Inf]     | (0.00665,Inf]     | NA         | NA            | (1.72,Inf]   |
| 1952 | NA                | NA                | NA         | NA            | NA           |
| 1953 | NA                | NA                | NA         | (1.11,Inf]    | NA           |
| 1954 | (0.00386,0.00875] | (0.00665,Inf]     | NA         | (1.11,Inf]    | (1.72,Inf]   |
| 1955 | NA                | (0.00292,0.00665] | NA         | (1.11,Inf]    | (1.72,Inf]   |
| 1956 | NA                | NA                | NA         | NA            | (1.72,Inf]   |
| 1957 | NA                | (0.00665,Inf]     | NA         | (1.11,Inf]    | (1.72,Inf]   |
| 1958 | NA                | NA                | NA         | NA            | NA           |
| 1959 | NA                | (0.00665,Inf]     | (0,0.46]   | (0,0.731]     | (1.72,Inf]   |
| 1960 | NA                | (0.00665,Inf]     | NA         | NA            | (1.72,Inf]   |
| 1961 | NA                | NA                | NA         | NA            | NA           |
| 1962 | NA                | NA                | NA         | (0,0.731]     | NA           |
| 1963 | NA                | NA                | NA         | (0.731,0.936] | NA           |
| 1964 | NA                | NA                | NA         | (0.731,0.936] | NA           |
| 1965 | NA                | NA                | NA         | (0.731,0.936] | NA           |
| 1966 | NA                | NA                | NA         | (0,0.731]     | NA           |
| 1967 | (0.00875,Inf]     | (0.00665,Inf]     | (0.46,Inf] | (1.11,Inf]    | (1.72,Inf]   |
| 1968 | NA                | NA                | NA         | (0,0.731]     | NA           |
| 1969 | NA                | NA                | NA         | (0,0.731]     | NA           |
| 1970 | (0.00875,Inf]     | (0.00665,Inf]     | NA         | (1.11,Inf]    | (1.72,Inf]   |
| 1971 | NA                | (0.00665,Inf]     | NA         | (1.11,Inf]    | (1.72,Inf]   |
| 1972 | NA                | NA                | (0.46,Inf] | NA            | NA           |

|      |               |               |            |               |               |
|------|---------------|---------------|------------|---------------|---------------|
| 1973 | (0.00875,Inf] | (0.00665,Inf] | (0,0.46]   | (0,0.731]     | (1.72,Inf]    |
| 1974 | NA            | NA            | NA         | NA            | (1.72,Inf]    |
| 1975 | NA            | NA            | NA         | NA            | (1.72,Inf]    |
| 1976 | NA            | NA            | NA         | (0,0.731]     | NA            |
| 1977 | NA            | NA            | NA         | NA            | (0.798,1.72]  |
| 1978 | NA            | NA            | (0.46,Inf] | NA            | NA            |
| 1979 | (0.00875,Inf] | NA            | NA         | (1.11,Inf]    | NA            |
| 1980 | (0.00875,Inf] | NA            | NA         | (1.11,Inf]    | NA            |
| 1981 | NA            | (0.00665,Inf] | NA         | (0,0.731]     | (1.72,Inf]    |
| 1982 | NA            | NA            | (0.46,Inf] | NA            | NA            |
| 1983 | NA            | NA            | NA         | (1.11,Inf]    | NA            |
| 1984 | NA            | NA            | (0.46,Inf] | NA            | NA            |
| 1985 | NA            | NA            | NA         | (1.11,Inf]    | NA            |
| 1986 | (0.00875,Inf] | (0.00665,Inf] | NA         | (0.731,0.936] | (0.213,0.798] |
| 1987 | (0.00875,Inf] | (0.00665,Inf] | (0.46,Inf] | (1.11,Inf]    | (0.213,0.798] |
| 1988 | NA            | NA            | NA         | (1.11,Inf]    | NA            |
| 1989 | NA            | NA            | NA         | NA            | NA            |
| 1990 | NA            | NA            | (0.46,Inf] | (1.11,Inf]    | NA            |
| 1991 | NA            | NA            | NA         | NA            | (0.213,0.798] |
| 1992 | NA            | NA            | NA         | NA            | NA            |
| 1993 | (0.00875,Inf] | (0.00665,Inf] | (0.46,Inf] | (1.11,Inf]    | (0.798,1.72]  |
| 1994 | NA            | NA            | (0.46,Inf] | NA            | (1.72,Inf]    |
| 1995 | NA            | NA            | (0.46,Inf] | NA            | NA            |
| 1996 | NA            | NA            | (0.46,Inf] | NA            | NA            |
| 1997 | NA            | NA            | NA         | NA            | NA            |
| 1998 | NA            | NA            | NA         | NA            | NA            |
| 1999 | (0.00875,Inf] | NA            | NA         | NA            | NA            |
| 2000 | NA            | NA            | NA         | (0,0.731]     | NA            |
| 2001 | NA            | NA            | NA         | (1.11,Inf]    | NA            |
| 2002 | NA            | NA            | NA         | NA            | NA            |
| 2003 | NA            | NA            | (0.46,Inf] | NA            | NA            |
| 2004 | (0.00875,Inf] | (0.00665,Inf] | NA         | (0,0.731]     | (0.213,0.798] |
| 2005 | NA            | NA            | (0.46,Inf] | NA            | NA            |
| 2006 | NA            | NA            | NA         | NA            | NA            |
| 2007 | (0.00875,Inf] | NA            | NA         | NA            | NA            |
| 2008 | NA            | NA            | NA         | NA            | NA            |
| 2009 | (0.00875,Inf] | NA            | (0.46,Inf] | (0.936,1.11]  | NA            |
| 2010 | NA            | NA            | NA         | (0,0.731]     | NA            |

|      |               |               |            |            |               |
|------|---------------|---------------|------------|------------|---------------|
| 2011 | NA            | NA            | NA         | NA         | NA            |
| 2012 | NA            | (0.00665,Inf] | NA         | (1.11,Inf] | (1.72,Inf]    |
| 2013 | NA            | NA            | (0.46,Inf] | NA         | NA            |
| 2014 | NA            | NA            | NA         | NA         | (0.213,0.798] |
| 2015 | NA            | NA            | NA         | NA         | (1.72,Inf]    |
| 2016 | NA            | NA            | (0.46,Inf] | NA         | NA            |
| 2017 | (0.00875,Inf] | (0.00665,Inf] | (0.46,Inf] | (1.11,Inf] | (0.798,1.72]  |
| 2018 | NA            | NA            | (0.46,Inf] | (1.11,Inf] | NA            |
| 2019 | NA            | NA            | (0.46,Inf] | NA         | NA            |
| 2020 | NA            | NA            | (0.46,Inf] | NA         | NA            |
| 2021 | NA            | NA            | (0.46,Inf] | NA         | NA            |
| 2022 | NA            | NA            | NA         | NA         | NA            |
| 2023 | NA            | NA            | (0.46,Inf] | (0,0.731]  | NA            |
| 2024 | NA            | NA            | NA         | NA         | (0.798,1.72]  |
| 2025 | NA            | NA            | (0.46,Inf] | NA         | NA            |
| 2026 | NA            | NA            | NA         | NA         | NA            |
| 2027 | (0.00875,Inf] | (0.00665,Inf] | NA         | (1.11,Inf] | (0.798,1.72]  |
| 2028 | NA            | NA            | (0.46,Inf] | NA         | (0.798,1.72]  |
| 2029 | NA            | NA            | NA         | NA         | NA            |
| 2030 | NA            | NA            | (0.46,Inf] | NA         | NA            |
| 2031 | NA            | NA            | NA         | NA         | (0.213,0.798] |
| 2032 | NA            | NA            | NA         | NA         | NA            |
| 2033 | NA            | NA            | NA         | NA         | (1.72,Inf]    |
| 2034 | NA            | NA            | NA         | NA         | (0.213,0.798] |
| 2035 | NA            | NA            | (0.46,Inf] | NA         | NA            |
| 2036 | NA            | NA            | (0.46,Inf] | NA         | NA            |
| 2037 | NA            | NA            | (0.46,Inf] | NA         | NA            |
| 2038 | NA            | NA            | NA         | NA         | (0,0.213]     |
| 2039 | NA            | NA            | NA         | NA         | (0,0.213]     |
| 2040 | NA            | NA            | NA         | NA         | (0.213,0.798] |
| 2041 | NA            | NA            | NA         | (1.11,Inf] | NA            |
| 2042 | NA            | NA            | NA         | NA         | (0.213,0.798] |
| 2043 | NA            | NA            | (0.46,Inf] | NA         | NA            |
| 2044 | NA            | NA            | NA         | (1.11,Inf] | NA            |
| 2045 | NA            | NA            | NA         | NA         | (1.72,Inf]    |
| 2046 | NA            | NA            | NA         | NA         | (1.72,Inf]    |
| 2047 | NA            | NA            | (0.46,Inf] | NA         | NA            |
| 2048 | NA            | NA            | (0.46,Inf] | NA         | NA            |

|      |               |               |            |            |               |
|------|---------------|---------------|------------|------------|---------------|
| 2049 | NA            | NA            | (0.46,Inf] | NA         | NA            |
| 2050 | NA            | NA            | (0.46,Inf] | NA         | NA            |
| 2051 | NA            | NA            | NA         | NA         | NA            |
| 2052 | (0.00875,Inf] | (0.00665,Inf] | NA         | (1.11,Inf] | (0.213,0.798] |
| 2053 | NA            | NA            | (0.46,Inf] | NA         | NA            |
| 2054 | NA            | NA            | NA         | (1.11,Inf] | NA            |
| 2055 | NA            | NA            | (0.46,Inf] | NA         | NA            |
| 2056 | NA            | NA            | (0.46,Inf] | NA         | NA            |
| 2057 | NA            | NA            | NA         | NA         | (1.72,Inf]    |
| 2058 | NA            | NA            | (0.46,Inf] | NA         | NA            |
| 2059 | NA            | NA            | (0.46,Inf] | NA         | NA            |
| 2060 | NA            | NA            | (0.46,Inf] | NA         | NA            |
| 2061 | NA            | NA            | (0.46,Inf] | NA         | NA            |
| 2062 | NA            | NA            | (0.46,Inf] | NA         | NA            |
| 2063 | NA            | NA            | NA         | NA         | NA            |
| 2064 | NA            | NA            | NA         | NA         | NA            |
| 2065 | NA            | NA            | NA         | NA         | (0.213,0.798] |
| 2066 | NA            | NA            | NA         | NA         | NA            |
| 2067 | NA            | NA            | (0.46,Inf] | NA         | NA            |
| 2068 | NA            | NA            | (0.46,Inf] | NA         | (0.213,0.798] |
| 2069 | NA            | NA            | NA         | NA         | (0,0.213]     |
| 2070 | NA            | NA            | NA         | NA         | NA            |
| 2071 | NA            | NA            | NA         | NA         | NA            |
| 2072 | NA            | NA            | NA         | NA         | (0.798,1.72]  |
| 2073 | NA            | NA            | NA         | (1.11,Inf] | NA            |
| 2074 | NA            | NA            | (0.46,Inf] | NA         | NA            |
| 2075 | NA            | NA            | (0.46,Inf] | NA         | NA            |
| 2076 | NA            | NA            | NA         | NA         | (1.72,Inf]    |
| 2077 | NA            | NA            | (0.46,Inf] | NA         | NA            |
| 2078 | NA            | NA            | (0.46,Inf] | NA         | NA            |
| 2079 | NA            | NA            | (0.46,Inf] | NA         | NA            |
| 2080 | NA            | NA            | NA         | NA         | NA            |
| 2081 | NA            | NA            | NA         | NA         | (0.798,1.72]  |
| 2082 | NA            | NA            | NA         | NA         | (0.798,1.72]  |
| 2083 | NA            | NA            | NA         | NA         | (0.213,0.798] |
| 2084 | NA            | NA            | (0.46,Inf] | NA         | NA            |
| 2085 | NA            | NA            | (0,0.46]   | NA         | (0.798,1.72]  |
| 2086 | NA            | NA            | NA         | NA         | (0.798,1.72]  |

|      |    |    |            |            |               |
|------|----|----|------------|------------|---------------|
| 2087 | NA | NA | NA         | NA         | NA            |
| 2088 | NA | NA | NA         | NA         | (0.798,1.72]  |
| 2089 | NA | NA | NA         | NA         | NA            |
| 2090 | NA | NA | NA         | NA         | (0.798,1.72]  |
| 2091 | NA | NA | NA         | NA         | (1.72,Inf]    |
| 2092 | NA | NA | (0,0.46]   | NA         | (1.72,Inf]    |
| 2093 | NA | NA | NA         | NA         | (0,0.213]     |
| 2094 | NA | NA | NA         | NA         | (0.798,1.72]  |
| 2095 | NA | NA | NA         | NA         | (1.72,Inf]    |
| 2096 | NA | NA | (0.46,Inf] | NA         | NA            |
| 2097 | NA | NA | NA         | NA         | (0.213,0.798] |
| 2098 | NA | NA | (0.46,Inf] | NA         | NA            |
| 2099 | NA | NA | NA         | NA         | NA            |
| 2100 | NA | NA | (0.46,Inf] | NA         | (0.213,0.798] |
| 2101 | NA | NA | (0.46,Inf] | NA         | (0.213,0.798] |
| 2102 | NA | NA | NA         | NA         | (1.72,Inf]    |
| 2103 | NA | NA | (0.46,Inf] | NA         | NA            |
| 2104 | NA | NA | NA         | NA         | NA            |
| 2105 | NA | NA | NA         | NA         | NA            |
| 2106 | NA | NA | (0.46,Inf] | NA         | NA            |
| 2107 | NA | NA | NA         | NA         | (0,0.213]     |
| 2108 | NA | NA | NA         | NA         | NA            |
| 2109 | NA | NA | (0.46,Inf] | NA         | NA            |
| 2110 | NA | NA | (0.46,Inf] | NA         | NA            |
| 2111 | NA | NA | (0.46,Inf] | NA         | NA            |
| 2112 | NA | NA | (0.46,Inf] | NA         | NA            |
| 2113 | NA | NA | NA         | NA         | NA            |
| 2114 | NA | NA | (0.46,Inf] | NA         | (1.72,Inf]    |
| 2115 | NA | NA | NA         | NA         | (1.72,Inf]    |
| 2116 | NA | NA | NA         | (1.11,Inf] | NA            |
| 2117 | NA | NA | NA         | NA         | (0.213,0.798] |
| 2118 | NA | NA | (0.46,Inf] | NA         | NA            |
| 2119 | NA | NA | NA         | NA         | (0,0.213]     |
| 2120 | NA | NA | (0.46,Inf] | NA         | NA            |
| 2121 | NA | NA | (0.46,Inf] | NA         | (1.72,Inf]    |
| 2122 | NA | NA | NA         | NA         | (0.798,1.72]  |
| 2123 | NA | NA | (0.46,Inf] | NA         | NA            |
| 2124 | NA | NA | (0.46,Inf] | NA         | NA            |



|      |    |    |            |    |               |
|------|----|----|------------|----|---------------|
| 2125 | NA | NA | (0.46,Inf] | NA | NA            |
| 2126 | NA | NA | NA         | NA | NA            |
| 2127 | NA | NA | (0.46,Inf] | NA | NA            |
| 2128 | NA | NA | NA         | NA | NA            |
| 2129 | NA | NA | NA         | NA | (0.213,0.798] |
| 2130 | NA | NA | NA         | NA | (0,0.213]     |
| 2131 | NA | NA | NA         | NA | NA            |
| 2132 | NA | NA | (0.46,Inf] | NA | NA            |
| 2133 | NA | NA | NA         | NA | NA            |
| 2134 | NA | NA | NA         | NA | NA            |
| 2135 | NA | NA | (0.46,Inf] | NA | NA            |
| 2136 | NA | NA | NA         | NA | NA            |
| 2137 | NA | NA | (0.46,Inf] | NA | NA            |
| 2138 | NA | NA | NA         | NA | (1.72,Inf]    |
| 2139 | NA | NA | NA         | NA | (0.213,0.798] |
| 2140 | NA | NA | NA         | NA | NA            |
| 2141 | NA | NA | NA         | NA | (0,0.213]     |
| 2142 | NA | NA | (0.46,Inf] | NA | NA            |
| 2143 | NA | NA | (0.46,Inf] | NA | NA            |
| 2144 | NA | NA | NA         | NA | NA            |
| 2145 | NA | NA | NA         | NA | (0.798,1.72]  |
| 2146 | NA | NA | (0.46,Inf] | NA | NA            |
| 2147 | NA | NA | NA         | NA | (1.72,Inf]    |
| 2148 | NA | NA | NA         | NA | (0,0.213]     |
| 2149 | NA | NA | NA         | NA | NA            |
| 2150 | NA | NA | (0.46,Inf] | NA | NA            |
| 2151 | NA | NA | NA         | NA | NA            |
| 2152 | NA | NA | NA         | NA | (1.72,Inf]    |
| 2153 | NA | NA | NA         | NA | NA            |
| 2154 | NA | NA | NA         | NA | NA            |
| 2155 | NA | NA | NA         | NA | NA            |
| 2156 | NA | NA | NA         | NA | (0.798,1.72]  |
| 2157 | NA | NA | (0.46,Inf] | NA | NA            |
| 2158 | NA | NA | NA         | NA | (0.213,0.798] |
| 2159 | NA | NA | (0.46,Inf] | NA | NA            |
| 2160 | NA | NA | NA         | NA | (0.798,1.72]  |
| 2161 | NA | NA | (0.46,Inf] | NA | NA            |
| 2162 | NA | NA | NA         | NA | (0.798,1.72]  |

|      |    |    |            |    |               |
|------|----|----|------------|----|---------------|
| 2163 | NA | NA | (0,0.46]   | NA | (1.72,Inf]    |
| 2164 | NA | NA | NA         | NA | NA            |
| 2165 | NA | NA | NA         | NA | NA            |
| 2166 | NA | NA | NA         | NA | (0,0.213]     |
| 2167 | NA | NA | NA         | NA | (0.213,0.798] |
| 2168 | NA | NA | NA         | NA | (0.213,0.798] |
| 2169 | NA | NA | NA         | NA | (1.72,Inf]    |
| 2170 | NA | NA | NA         | NA | (0.213,0.798] |
| 2171 | NA | NA | NA         | NA | NA            |
| 2172 | NA | NA | (0.46,Inf] | NA | NA            |
| 2173 | NA | NA | (0.46,Inf] | NA | NA            |
| 2174 | NA | NA | NA         | NA | (0,0.213]     |
| 2175 | NA | NA | NA         | NA | (0.798,1.72]  |
| 2176 | NA | NA | NA         | NA | NA            |
| 2177 | NA | NA | (0.46,Inf] | NA | NA            |
| 2178 | NA | NA | NA         | NA | (0,0.213]     |
| 2179 | NA | NA | NA         | NA | (1.72,Inf]    |
| 2180 | NA | NA | NA         | NA | NA            |
| 2181 | NA | NA | (0.46,Inf] | NA | NA            |
| 2182 | NA | NA | NA         | NA | (0,0.213]     |
| 2183 | NA | NA | (0.46,Inf] | NA | NA            |
| 2184 | NA | NA | (0.46,Inf] | NA | NA            |
| 2185 | NA | NA | NA         | NA | (0.798,1.72]  |
| 2186 | NA | NA | NA         | NA | NA            |
| 2187 | NA | NA | NA         | NA | (1.72,Inf]    |
| 2188 | NA | NA | NA         | NA | (0.213,0.798] |
| 2189 | NA | NA | NA         | NA | NA            |
| 2190 | NA | NA | (0.46,Inf] | NA | NA            |
| 2191 | NA | NA | NA         | NA | (1.72,Inf]    |
| 2192 | NA | NA | NA         | NA | (1.72,Inf]    |
| 2193 | NA | NA | NA         | NA | (0.213,0.798] |
| 2194 | NA | NA | NA         | NA | NA            |
| 2195 | NA | NA | NA         | NA | (0.213,0.798] |
| 2196 | NA | NA | NA         | NA | (1.72,Inf]    |
| 2197 | NA | NA | NA         | NA | NA            |
| 2198 | NA | NA | NA         | NA | NA            |
| 2199 | NA | NA | NA         | NA | (0.798,1.72]  |
| 2200 | NA | NA | NA         | NA | (0.213,0.798] |

|      |    |    |            |    |               |
|------|----|----|------------|----|---------------|
| 2201 | NA | NA | NA         | NA | (1.72,Inf]    |
| 2202 | NA | NA | NA         | NA | NA            |
| 2203 | NA | NA | NA         | NA | NA            |
| 2204 | NA | NA | (0.46,Inf] | NA | NA            |
| 2205 | NA | NA | (0,0.46]   | NA | (0.798,1.72]  |
| 2206 | NA | NA | NA         | NA | NA            |
| 2207 | NA | NA | NA         | NA | (0.213,0.798] |
| 2208 | NA | NA | (0.46,Inf] | NA | NA            |
| 2209 | NA | NA | (0.46,Inf] | NA | NA            |
| 2210 | NA | NA | NA         | NA | (1.72,Inf]    |
| 2211 | NA | NA | NA         | NA | (0.798,1.72]  |
| 2212 | NA | NA | NA         | NA | (1.72,Inf]    |
| 2213 | NA | NA | NA         | NA | NA            |
| 2214 | NA | NA | NA         | NA | NA            |
| 2215 | NA | NA | (0.46,Inf] | NA | NA            |
| 2216 | NA | NA | (0.46,Inf] | NA | NA            |
| 2217 | NA | NA | NA         | NA | (0.798,1.72]  |
| 2218 | NA | NA | (0.46,Inf] | NA | (0.213,0.798] |
| 2219 | NA | NA | (0.46,Inf] | NA | NA            |
| 2220 | NA | NA | NA         | NA | NA            |
| 2221 | NA | NA | NA         | NA | (0.213,0.798] |
| 2222 | NA | NA | (0.46,Inf] | NA | NA            |
| 2223 | NA | NA | NA         | NA | NA            |
| 2224 | NA | NA | (0.46,Inf] | NA | NA            |
| 2225 | NA | NA | NA         | NA | NA            |
| 2226 | NA | NA | NA         | NA | NA            |
| 2227 | NA | NA | NA         | NA | (0.798,1.72]  |
| 2228 | NA | NA | NA         | NA | (0,0.213]     |
| 2229 | NA | NA | NA         | NA | (0,0.213]     |
| 2230 | NA | NA | NA         | NA | NA            |
| 2231 | NA | NA | (0.46,Inf] | NA | (0,0.213]     |
| 2232 | NA | NA | NA         | NA | NA            |
| 2233 | NA | NA | NA         | NA | (0.213,0.798] |
| 2234 | NA | NA | NA         | NA | (0.213,0.798] |
| 2235 | NA | NA | (0,0.46]   | NA | (1.72,Inf]    |
| 2236 | NA | NA | NA         | NA | (0.798,1.72]  |
| 2237 | NA | NA | NA         | NA | (1.72,Inf]    |
| 2238 | NA | NA | NA         | NA | (0.213,0.798] |

|      |    |    |            |    |               |
|------|----|----|------------|----|---------------|
| 2239 | NA | NA | NA         | NA | NA            |
| 2240 | NA | NA | NA         | NA | NA            |
| 2241 | NA | NA | NA         | NA | (1.72,Inf]    |
| 2242 | NA | NA | NA         | NA | (1.72,Inf]    |
| 2243 | NA | NA | NA         | NA | (1.72,Inf]    |
| 2244 | NA | NA | NA         | NA | (1.72,Inf]    |
| 2245 | NA | NA | NA         | NA | (0,0.213]     |
| 2246 | NA | NA | NA         | NA | (0.213,0.798] |
| 2247 | NA | NA | (0.46,Inf] | NA | (0.213,0.798] |
| 2248 | NA | NA | NA         | NA | (0.213,0.798] |
| 2249 | NA | NA | NA         | NA | NA            |
| 2250 | NA | NA | NA         | NA | (0,0.213]     |
| 2251 | NA | NA | NA         | NA | NA            |
| 2252 | NA | NA | NA         | NA | (0.798,1.72]  |
| 2253 | NA | NA | NA         | NA | (1.72,Inf]    |
| 2254 | NA | NA | NA         | NA | (1.72,Inf]    |
| 2255 | NA | NA | NA         | NA | NA            |
| 2256 | NA | NA | (0.46,Inf] | NA | (0.213,0.798] |
| 2257 | NA | NA | NA         | NA | (0,0.213]     |
| 2258 | NA | NA | NA         | NA | NA            |
| 2259 | NA | NA | NA         | NA | NA            |
| 2260 | NA | NA | NA         | NA | NA            |
| 2261 | NA | NA | NA         | NA | (1.72,Inf]    |
| 2262 | NA | NA | (0.46,Inf] | NA | NA            |
| 2263 | NA | NA | NA         | NA | (0.213,0.798] |
| 2264 | NA | NA | NA         | NA | NA            |
| 2265 | NA | NA | NA         | NA | (0.213,0.798] |
| 2266 | NA | NA | (0.46,Inf] | NA | NA            |
| 2267 | NA | NA | (0.46,Inf] | NA | NA            |
| 2268 | NA | NA | NA         | NA | NA            |
| 2269 | NA | NA | NA         | NA | NA            |
| 2270 | NA | NA | NA         | NA | NA            |
| 2271 | NA | NA | (0.46,Inf] | NA | NA            |
| 2272 | NA | NA | (0.46,Inf] | NA | NA            |
| 2273 | NA | NA | NA         | NA | NA            |
| 2274 | NA | NA | NA         | NA | (1.72,Inf]    |
| 2275 | NA | NA | NA         | NA | (0.213,0.798] |
| 2276 | NA | NA | (0.46,Inf] | NA | NA            |

|      |    |    |            |    |               |
|------|----|----|------------|----|---------------|
| 2277 | NA | NA | NA         | NA | (0,0.213]     |
| 2278 | NA | NA | NA         | NA | (0.213,0.798] |
| 2279 | NA | NA | NA         | NA | NA            |
| 2280 | NA | NA | (0.46,Inf] | NA | (1.72,Inf]    |
| 2281 | NA | NA | NA         | NA | (1.72,Inf]    |
| 2282 | NA | NA | NA         | NA | NA            |
| 2283 | NA | NA | (0.46,Inf] | NA | NA            |
| 2284 | NA | NA | NA         | NA | (1.72,Inf]    |
| 2285 | NA | NA | (0.46,Inf] | NA | NA            |
| 2286 | NA | NA | NA         | NA | (0.213,0.798] |
| 2287 | NA | NA | NA         | NA | NA            |
| 2288 | NA | NA | (0.46,Inf] | NA | NA            |
| 2289 | NA | NA | NA         | NA | (1.72,Inf]    |
| 2290 | NA | NA | NA         | NA | (1.72,Inf]    |
| 2291 | NA | NA | NA         | NA | (0.213,0.798] |
| 2292 | NA | NA | (0.46,Inf] | NA | NA            |
| 2293 | NA | NA | NA         | NA | NA            |
| 2294 | NA | NA | NA         | NA | NA            |
| 2295 | NA | NA | NA         | NA | (0.213,0.798] |
| 2296 | NA | NA | (0.46,Inf] | NA | NA            |
| 2297 | NA | NA | NA         | NA | (1.72,Inf]    |
| 2298 | NA | NA | NA         | NA | NA            |
| 2299 | NA | NA | NA         | NA | (1.72,Inf]    |
| 2300 | NA | NA | (0.46,Inf] | NA | NA            |
| 2301 | NA | NA | (0.46,Inf] | NA | NA            |
| 2302 | NA | NA | NA         | NA | (1.72,Inf]    |
| 2303 | NA | NA | (0,0.46]   | NA | NA            |
| 2304 | NA | NA | (0.46,Inf] | NA | NA            |
| 2305 | NA | NA | (0.46,Inf] | NA | (0.798,1.72]  |
| 2306 | NA | NA | NA         | NA | (1.72,Inf]    |
| 2307 | NA | NA | NA         | NA | (1.72,Inf]    |
| 2308 | NA | NA | NA         | NA | NA            |
| 2309 | NA | NA | NA         | NA | NA            |
| 2310 | NA | NA | NA         | NA | NA            |
| 2311 | NA | NA | NA         | NA | (0.213,0.798] |
| 2312 | NA | NA | (0.46,Inf] | NA | NA            |
| 2313 | NA | NA | NA         | NA | NA            |
| 2314 | NA | NA | NA         | NA | NA            |

|      |    |    |            |    |               |
|------|----|----|------------|----|---------------|
| 2315 | NA | NA | NA         | NA | NA            |
| 2316 | NA | NA | NA         | NA | (0,0.213]     |
| 2317 | NA | NA | (0.46,Inf] | NA | NA            |
| 2318 | NA | NA | NA         | NA | (0.798,1.72]  |
| 2319 | NA | NA | NA         | NA | (0.213,0.798] |
| 2320 | NA | NA | NA         | NA | (0,0.213]     |
| 2321 | NA | NA | NA         | NA | NA            |
| 2322 | NA | NA | (0.46,Inf] | NA | NA            |
| 2323 | NA | NA | NA         | NA | (0.213,0.798] |
| 2324 | NA | NA | (0.46,Inf] | NA | NA            |
| 2325 | NA | NA | (0,0.46]   | NA | NA            |
| 2326 | NA | NA | NA         | NA | (0.798,1.72]  |
| 2327 | NA | NA | NA         | NA | (0.798,1.72]  |
| 2328 | NA | NA | NA         | NA | (0.798,1.72]  |
| 2329 | NA | NA | NA         | NA | NA            |
| 2330 | NA | NA | NA         | NA | (1.72,Inf]    |
| 2331 | NA | NA | NA         | NA | (1.72,Inf]    |
| 2332 | NA | NA | NA         | NA | (1.72,Inf]    |
| 2333 | NA | NA | NA         | NA | NA            |
| 2334 | NA | NA | NA         | NA | (1.72,Inf]    |
| 2335 | NA | NA | NA         | NA | NA            |
| 2336 | NA | NA | NA         | NA | (1.72,Inf]    |
| 2337 | NA | NA | NA         | NA | NA            |
| 2338 | NA | NA | NA         | NA | (1.72,Inf]    |
| 2339 | NA | NA | (0.46,Inf] | NA | NA            |
| 2340 | NA | NA | (0.46,Inf] | NA | (0.213,0.798] |
| 2341 | NA | NA | (0.46,Inf] | NA | (0.213,0.798] |
| 2342 | NA | NA | NA         | NA | NA            |
| 2343 | NA | NA | NA         | NA | NA            |
| 2344 | NA | NA | NA         | NA | NA            |
| 2345 | NA | NA | (0.46,Inf] | NA | NA            |
| 2346 | NA | NA | NA         | NA | (0.798,1.72]  |
| 2347 | NA | NA | NA         | NA | (0.213,0.798] |
| 2348 | NA | NA | NA         | NA | NA            |
| 2349 | NA | NA | (0.46,Inf] | NA | (0,0.213]     |
| 2350 | NA | NA | NA         | NA | (0,0.213]     |
| 2351 | NA | NA | NA         | NA | (0.798,1.72]  |
| 2352 | NA | NA | (0.46,Inf] | NA | NA            |

|      |    |    |            |    |               |
|------|----|----|------------|----|---------------|
| 2353 | NA | NA | NA         | NA | NA            |
| 2354 | NA | NA | (0.46,Inf] | NA | NA            |
| 2355 | NA | NA | NA         | NA | (1.72,Inf]    |
| 2356 | NA | NA | NA         | NA | (0.213,0.798] |
| 2357 | NA | NA | NA         | NA | NA            |
| 2358 | NA | NA | NA         | NA | (0,0.213]     |
| 2359 | NA | NA | NA         | NA | NA            |
| 2360 | NA | NA | NA         | NA | (1.72,Inf]    |
| 2361 | NA | NA | NA         | NA | (0.213,0.798] |
| 2362 | NA | NA | (0.46,Inf] | NA | (0.213,0.798] |
| 2363 | NA | NA | NA         | NA | (0.213,0.798] |
| 2364 | NA | NA | (0,0.46]   | NA | (0.798,1.72]  |
| 2365 | NA | NA | NA         | NA | NA            |
| 2366 | NA | NA | NA         | NA | (1.72,Inf]    |
| 2367 | NA | NA | NA         | NA | NA            |
| 2368 | NA | NA | NA         | NA | NA            |
| 2369 | NA | NA | NA         | NA | (0.213,0.798] |
| 2370 | NA | NA | NA         | NA | (1.72,Inf]    |
| 2371 | NA | NA | NA         | NA | (0,0.213]     |
| 2372 | NA | NA | NA         | NA | NA            |
| 2373 | NA | NA | (0.46,Inf] | NA | NA            |
| 2374 | NA | NA | NA         | NA | NA            |
| 2375 | NA | NA | NA         | NA | (0.213,0.798] |
| 2376 | NA | NA | (0.46,Inf] | NA | NA            |
| 2377 | NA | NA | NA         | NA | NA            |
| 2378 | NA | NA | NA         | NA | (0.213,0.798] |
| 2379 | NA | NA | (0.46,Inf] | NA | NA            |
| 2380 | NA | NA | NA         | NA | (0.213,0.798] |
| 2381 | NA | NA | NA         | NA | NA            |
| 2382 | NA | NA | NA         | NA | NA            |
| 2383 | NA | NA | (0,0.46]   | NA | (1.72,Inf]    |
| 2384 | NA | NA | (0.46,Inf] | NA | NA            |
| 2385 | NA | NA | NA         | NA | NA            |
| 2386 | NA | NA | NA         | NA | NA            |
| 2387 | NA | NA | (0.46,Inf] | NA | NA            |
| 2388 | NA | NA | (0.46,Inf] | NA | NA            |
| 2389 | NA | NA | NA         | NA | NA            |
| 2390 | NA | NA | NA         | NA | NA            |

|      |    |    |            |    |               |
|------|----|----|------------|----|---------------|
| 2391 | NA | NA | NA         | NA | (1.72,Inf]    |
| 2392 | NA | NA | NA         | NA | (0.213,0.798] |
| 2393 | NA | NA | NA         | NA | NA            |
| 2394 | NA | NA | NA         | NA | NA            |
| 2395 | NA | NA | NA         | NA | (0,0.213]     |
| 2396 | NA | NA | NA         | NA | NA            |
| 2397 | NA | NA | NA         | NA | NA            |
| 2398 | NA | NA | NA         | NA | (1.72,Inf]    |
| 2399 | NA | NA | (0.46,Inf] | NA | NA            |
| 2400 | NA | NA | NA         | NA | NA            |
| 2401 | NA | NA | NA         | NA | NA            |
| 2402 | NA | NA | NA         | NA | NA            |
| 2403 | NA | NA | NA         | NA | NA            |
| 2404 | NA | NA | NA         | NA | NA            |
| 2405 | NA | NA | (0.46,Inf] | NA | (1.72,Inf]    |
| 2406 | NA | NA | (0,0.46]   | NA | (1.72,Inf]    |
| 2407 | NA | NA | NA         | NA | (1.72,Inf]    |
| 2408 | NA | NA | (0.46,Inf] | NA | NA            |
| 2409 | NA | NA | NA         | NA | NA            |
| 2410 | NA | NA | (0.46,Inf] | NA | NA            |
| 2411 | NA | NA | NA         | NA | NA            |
| 2412 | NA | NA | NA         | NA | NA            |
| 2413 | NA | NA | NA         | NA | (1.72,Inf]    |
| 2414 | NA | NA | (0,0.46]   | NA | (0,0.213]     |
| 2415 | NA | NA | (0.46,Inf] | NA | NA            |
| 2416 | NA | NA | NA         | NA | NA            |
| 2417 | NA | NA | NA         | NA | (1.72,Inf]    |
| 2418 | NA | NA | (0.46,Inf] | NA | (0.798,1.72]  |
| 2419 | NA | NA | NA         | NA | (1.72,Inf]    |
| 2420 | NA | NA | NA         | NA | NA            |
| 2421 | NA | NA | (0.46,Inf] | NA | NA            |
| 2422 | NA | NA | (0.46,Inf] | NA | (0.213,0.798] |
| 2423 | NA | NA | NA         | NA | NA            |
| 2424 | NA | NA | NA         | NA | (1.72,Inf]    |
| 2425 | NA | NA | NA         | NA | (1.72,Inf]    |
| 2426 | NA | NA | NA         | NA | (0.213,0.798] |
| 2427 | NA | NA | NA         | NA | NA            |
| 2428 | NA | NA | NA         | NA | NA            |



|      |    |    |            |    |               |
|------|----|----|------------|----|---------------|
| 2429 | NA | NA | NA         | NA | NA            |
| 2430 | NA | NA | NA         | NA | NA            |
| 2431 | NA | NA | NA         | NA | NA            |
| 2432 | NA | NA | (0.46,Inf] | NA | NA            |
| 2433 | NA | NA | NA         | NA | NA            |
| 2434 | NA | NA | NA         | NA | NA            |
| 2435 | NA | NA | NA         | NA | (1.72,Inf]    |
| 2436 | NA | NA | NA         | NA | NA            |
| 2437 | NA | NA | NA         | NA | NA            |
| 2438 | NA | NA | NA         | NA | NA            |
| 2439 | NA | NA | NA         | NA | NA            |
| 2440 | NA | NA | (0.46,Inf] | NA | NA            |
| 2441 | NA | NA | NA         | NA | (0,0.213]     |
| 2442 | NA | NA | NA         | NA | (1.72,Inf]    |
| 2443 | NA | NA | NA         | NA | NA            |
| 2444 | NA | NA | NA         | NA | (1.72,Inf]    |
| 2445 | NA | NA | NA         | NA | (0.798,1.72]  |
| 2446 | NA | NA | NA         | NA | (1.72,Inf]    |
| 2447 | NA | NA | NA         | NA | NA            |
| 2448 | NA | NA | (0,0.46]   | NA | (1.72,Inf]    |
| 2449 | NA | NA | NA         | NA | NA            |
| 2450 | NA | NA | NA         | NA | (1.72,Inf]    |
| 2451 | NA | NA | (0.46,Inf] | NA | NA            |
| 2452 | NA | NA | NA         | NA | (1.72,Inf]    |
| 2453 | NA | NA | NA         | NA | (1.72,Inf]    |
| 2454 | NA | NA | NA         | NA | NA            |
| 2455 | NA | NA | NA         | NA | NA            |
| 2456 | NA | NA | NA         | NA | (1.72,Inf]    |
| 2457 | NA | NA | NA         | NA | (0.213,0.798] |
| 2458 | NA | NA | NA         | NA | NA            |
| 2459 | NA | NA | NA         | NA | NA            |
| 2460 | NA | NA | NA         | NA | NA            |
| 2461 | NA | NA | NA         | NA | NA            |
| 2462 | NA | NA | (0.46,Inf] | NA | NA            |
| 2463 | NA | NA | NA         | NA | NA            |
| 2464 | NA | NA | (0.46,Inf] | NA | NA            |
| 2465 | NA | NA | (0.46,Inf] | NA | (1.72,Inf]    |
| 2466 | NA | NA | NA         | NA | NA            |

|      |    |    |            |    |               |
|------|----|----|------------|----|---------------|
| 2467 | NA | NA | (0.46,Inf] | NA | NA            |
| 2468 | NA | NA | (0.46,Inf] | NA | NA            |
| 2469 | NA | NA | NA         | NA | NA            |
| 2470 | NA | NA | (0.46,Inf] | NA | (1.72,Inf]    |
| 2471 | NA | NA | NA         | NA | NA            |
| 2472 | NA | NA | NA         | NA | NA            |
| 2473 | NA | NA | NA         | NA | (1.72,Inf]    |
| 2474 | NA | NA | (0.46,Inf] | NA | NA            |
| 2475 | NA | NA | NA         | NA | NA            |
| 2476 | NA | NA | NA         | NA | NA            |
| 2477 | NA | NA | NA         | NA | NA            |
| 2478 | NA | NA | NA         | NA | NA            |
| 2479 | NA | NA | (0.46,Inf] | NA | NA            |
| 2480 | NA | NA | NA         | NA | (1.72,Inf]    |
| 2481 | NA | NA | NA         | NA | NA            |
| 2482 | NA | NA | NA         | NA | (0.213,0.798] |
| 2483 | NA | NA | NA         | NA | NA            |
| 2484 | NA | NA | NA         | NA | (1.72,Inf]    |
| 2485 | NA | NA | NA         | NA | (1.72,Inf]    |
| 2486 | NA | NA | NA         | NA | (0.798,1.72]  |
| 2487 | NA | NA | NA         | NA | (1.72,Inf]    |
| 2488 | NA | NA | NA         | NA | NA            |
| 2489 | NA | NA | NA         | NA | NA            |
| 2490 | NA | NA | NA         | NA | NA            |
| 2491 | NA | NA | NA         | NA | (0.213,0.798] |
| 2492 | NA | NA | NA         | NA | NA            |
| 2493 | NA | NA | (0.46,Inf] | NA | NA            |
| 2494 | NA | NA | NA         | NA | (1.72,Inf]    |
| 2495 | NA | NA | NA         | NA | NA            |
| 2496 | NA | NA | (0.46,Inf] | NA | NA            |
| 2497 | NA | NA | NA         | NA | (1.72,Inf]    |
| 2498 | NA | NA | (0.46,Inf] | NA | (1.72,Inf]    |
| 2499 | NA | NA | NA         | NA | NA            |
| 2500 | NA | NA | (0.46,Inf] | NA | NA            |
| 2501 | NA | NA | NA         | NA | NA            |
| 2502 | NA | NA | NA         | NA | (1.72,Inf]    |
| 2503 | NA | NA | NA         | NA | (0.213,0.798] |
| 2504 | NA | NA | NA         | NA | NA            |

|      |               |    |            |    |               |
|------|---------------|----|------------|----|---------------|
| 2505 | NA            | NA | NA         | NA | (1.72,Inf]    |
| 2506 | NA            | NA | NA         | NA | (0.213,0.798] |
| 2507 | NA            | NA | (0.46,Inf] | NA | (1.72,Inf]    |
| 2508 | NA            | NA | NA         | NA | (0.213,0.798] |
| 2509 | NA            | NA | NA         | NA | (1.72,Inf]    |
| 2510 | NA            | NA | NA         | NA | NA            |
| 2511 | NA            | NA | NA         | NA | NA            |
| 2512 | NA            | NA | NA         | NA | NA            |
| 2513 | NA            | NA | NA         | NA | NA            |
| 2514 | NA            | NA | NA         | NA | NA            |
| 2515 | NA            | NA | NA         | NA | NA            |
| 2516 | NA            | NA | NA         | NA | (0.213,0.798] |
| 2517 | NA            | NA | (0.46,Inf] | NA | NA            |
| 2518 | NA            | NA | (0.46,Inf] | NA | NA            |
| 2519 | NA            | NA | NA         | NA | NA            |
| 2520 | NA            | NA | (0.46,Inf] | NA | (1.72,Inf]    |
| 2521 | NA            | NA | NA         | NA | NA            |
| 2522 | NA            | NA | NA         | NA | NA            |
| 2523 | NA            | NA | NA         | NA | (1.72,Inf]    |
| 2524 | NA            | NA | NA         | NA | NA            |
| 2525 | NA            | NA | NA         | NA | NA            |
| 2526 | NA            | NA | NA         | NA | (0.213,0.798] |
| 2527 | NA            | NA | NA         | NA | (0.213,0.798] |
| 2528 | NA            | NA | NA         | NA | NA            |
| 2529 | NA            | NA | NA         | NA | NA            |
| 2530 | NA            | NA | NA         | NA | (1.72,Inf]    |
| 2531 | NA            | NA | NA         | NA | NA            |
| 2532 | NA            | NA | NA         | NA | NA            |
| 2533 | NA            | NA | NA         | NA | NA            |
| 2534 | NA            | NA | NA         | NA | NA            |
| 2535 | NA            | NA | NA         | NA | NA            |
| 2536 | NA            | NA | (0.46,Inf] | NA | (0.798,1.72]  |
| 2537 | NA            | NA | (0.46,Inf] | NA | NA            |
| 2538 | NA            | NA | NA         | NA | NA            |
| 2539 | NA            | NA | NA         | NA | NA            |
| 2540 | (0.00875,Inf] | NA | NA         | NA | NA            |
| 2541 | NA            | NA | NA         | NA | NA            |
| 2542 | NA            | NA | NA         | NA | NA            |

|      |    |    |            |    |               |
|------|----|----|------------|----|---------------|
| 2543 | NA | NA | NA         | NA | NA            |
| 2544 | NA | NA | NA         | NA | (1.72,Inf]    |
| 2545 | NA | NA | NA         | NA | NA            |
| 2546 | NA | NA | NA         | NA | NA            |
| 2547 | NA | NA | NA         | NA | (1.72,Inf]    |
| 2548 | NA | NA | NA         | NA | NA            |
| 2549 | NA | NA | NA         | NA | NA            |
| 2550 | NA | NA | NA         | NA | (1.72,Inf]    |
| 2551 | NA | NA | NA         | NA | (0.798,1.72]  |
| 2552 | NA | NA | NA         | NA | (1.72,Inf]    |
| 2553 | NA | NA | (0.46,Inf] | NA | NA            |
| 2554 | NA | NA | NA         | NA | NA            |
| 2555 | NA | NA | NA         | NA | NA            |
| 2556 | NA | NA | NA         | NA | (1.72,Inf]    |
| 2557 | NA | NA | NA         | NA | NA            |
| 2558 | NA | NA | NA         | NA | (1.72,Inf]    |
| 2559 | NA | NA | NA         | NA | (1.72,Inf]    |
| 2560 | NA | NA | NA         | NA | (1.72,Inf]    |
| 2561 | NA | NA | NA         | NA | (1.72,Inf]    |
| 2562 | NA | NA | NA         | NA | NA            |
| 2563 | NA | NA | NA         | NA | NA            |
| 2564 | NA | NA | NA         | NA | (1.72,Inf]    |
| 2565 | NA | NA | NA         | NA | (1.72,Inf]    |
| 2566 | NA | NA | NA         | NA | (1.72,Inf]    |
| 2567 | NA | NA | NA         | NA | NA            |
| 2568 | NA | NA | NA         | NA | NA            |
| 2569 | NA | NA | NA         | NA | NA            |
| 2570 | NA | NA | NA         | NA | (1.72,Inf]    |
| 2571 | NA | NA | (0.46,Inf] | NA | (1.72,Inf]    |
| 2572 | NA | NA | NA         | NA | (0.213,0.798] |
| 2573 | NA | NA | NA         | NA | (1.72,Inf]    |
| 2574 | NA | NA | NA         | NA | (1.72,Inf]    |
| 2575 | NA | NA | NA         | NA | NA            |
| 2576 | NA | NA | NA         | NA | NA            |
| 2577 | NA | NA | NA         | NA | (1.72,Inf]    |
| 2578 | NA | NA | NA         | NA | (1.72,Inf]    |
| 2579 | NA | NA | NA         | NA | (1.72,Inf]    |
| 2580 | NA | NA | NA         | NA | NA            |

|      |    |    |            |    |               |
|------|----|----|------------|----|---------------|
| 2581 | NA | NA | NA         | NA | (0.798,1.72]  |
| 2582 | NA | NA | NA         | NA | NA            |
| 2583 | NA | NA | NA         | NA | (1.72,Inf]    |
| 2584 | NA | NA | NA         | NA | (1.72,Inf]    |
| 2585 | NA | NA | NA         | NA | NA            |
| 2586 | NA | NA | NA         | NA | (1.72,Inf]    |
| 2587 | NA | NA | NA         | NA | NA            |
| 2588 | NA | NA | NA         | NA | (1.72,Inf]    |
| 2589 | NA | NA | NA         | NA | (0.213,0.798] |
| 2590 | NA | NA | NA         | NA | (1.72,Inf]    |
| 2591 | NA | NA | NA         | NA | (1.72,Inf]    |
| 2592 | NA | NA | NA         | NA | NA            |
| 2593 | NA | NA | (0.46,Inf] | NA | NA            |
| 2594 | NA | NA | NA         | NA | NA            |
| 2595 | NA | NA | (0.46,Inf] | NA | NA            |
| 2596 | NA | NA | NA         | NA | NA            |
| 2597 | NA | NA | NA         | NA | NA            |
| 2598 | NA | NA | NA         | NA | (1.72,Inf]    |
| 2599 | NA | NA | NA         | NA | NA            |
| 2600 | NA | NA | NA         | NA | NA            |
| 2601 | NA | NA | NA         | NA | (1.72,Inf]    |
| 2602 | NA | NA | NA         | NA | (0.798,1.72]  |
| 2603 | NA | NA | NA         | NA | NA            |
| 2604 | NA | NA | NA         | NA | (1.72,Inf]    |
| 2605 | NA | NA | NA         | NA | NA            |
| 2606 | NA | NA | NA         | NA | (1.72,Inf]    |
| 2607 | NA | NA | NA         | NA | NA            |
| 2608 | NA | NA | NA         | NA | NA            |
| 2609 | NA | NA | NA         | NA | (1.72,Inf]    |
| 2610 | NA | NA | NA         | NA | NA            |
| 2611 | NA | NA | NA         | NA | NA            |
| 2612 | NA | NA | NA         | NA | (1.72,Inf]    |
| 2613 | NA | NA | NA         | NA | (0.798,1.72]  |
| 2614 | NA | NA | NA         | NA | (1.72,Inf]    |
| 2615 | NA | NA | NA         | NA | (1.72,Inf]    |
| 2616 | NA | NA | NA         | NA | (1.72,Inf]    |
| 2617 | NA | NA | NA         | NA | (1.72,Inf]    |
| 2618 | NA | NA | (0.46,Inf] | NA | NA            |

|      |    |    |            |    |            |
|------|----|----|------------|----|------------|
| 2619 | NA | NA | NA         | NA | NA         |
| 2620 | NA | NA | NA         | NA | (1.72,Inf] |
| 2621 | NA | NA | NA         | NA | (1.72,Inf] |
| 2622 | NA | NA | NA         | NA | (1.72,Inf] |
| 2623 | NA | NA | NA         | NA | (1.72,Inf] |
| 2624 | NA | NA | NA         | NA | NA         |
| 2625 | NA | NA | NA         | NA | NA         |
| 2626 | NA | NA | NA         | NA | (1.72,Inf] |
| 2627 | NA | NA | (0.46,Inf] | NA | (1.72,Inf] |
| 2628 | NA | NA | NA         | NA | NA         |
| 2629 | NA | NA | NA         | NA | NA         |
| 2630 | NA | NA | (0.46,Inf] | NA | NA         |
| 2631 | NA | NA | NA         | NA | (1.72,Inf] |
| 2632 | NA | NA | NA         | NA | NA         |
| 2633 | NA | NA | NA         | NA | (1.72,Inf] |
| 2634 | NA | NA | NA         | NA | (1.72,Inf] |
| 2635 | NA | NA | NA         | NA | NA         |
| 2636 | NA | NA | (0.46,Inf] | NA | NA         |
| 2637 | NA | NA | NA         | NA | (1.72,Inf] |
| 2638 | NA | NA | NA         | NA | (1.72,Inf] |
| 2639 | NA | NA | NA         | NA | NA         |
| 2640 | NA | NA | NA         | NA | (1.72,Inf] |
| 2641 | NA | NA | NA         | NA | NA         |
| 2642 | NA | NA | NA         | NA | NA         |
| 2643 | NA | NA | (0.46,Inf] | NA | NA         |
| 2644 | NA | NA | NA         | NA | (1.72,Inf] |
| 2645 | NA | NA | NA         | NA | (1.72,Inf] |
| 2646 | NA | NA | NA         | NA | (1.72,Inf] |
| 2647 | NA | NA | NA         | NA | (1.72,Inf] |
| 2648 | NA | NA | NA         | NA | (1.72,Inf] |
| 2649 | NA | NA | NA         | NA | NA         |
| 2650 | NA | NA | NA         | NA | (1.72,Inf] |
| 2651 | NA | NA | NA         | NA | (1.72,Inf] |
| 2652 | NA | NA | NA         | NA | (1.72,Inf] |
| 2653 | NA | NA | NA         | NA | (1.72,Inf] |
| 2654 | NA | NA | NA         | NA | (1.72,Inf] |
| 2655 | NA | NA | NA         | NA | NA         |
| 2656 | NA | NA | NA         | NA | NA         |

|      |    |    |            |    |            |
|------|----|----|------------|----|------------|
| 2657 | NA | NA | NA         | NA | (1.72,Inf] |
| 2658 | NA | NA | (0.46,Inf] | NA | NA         |
| 2659 | NA | NA | NA         | NA | NA         |
| 2660 | NA | NA | NA         | NA | (1.72,Inf] |
| 2661 | NA | NA | NA         | NA | (1.72,Inf] |
| 2662 | NA | NA | (0.46,Inf] | NA | (1.72,Inf] |
| 2663 | NA | NA | NA         | NA | (1.72,Inf] |
| 2664 | NA | NA | NA         | NA | NA         |
| 2665 | NA | NA | NA         | NA | (1.72,Inf] |
| 2666 | NA | NA | NA         | NA | (1.72,Inf] |
| 2667 | NA | NA | NA         | NA | (1.72,Inf] |
| 2668 | NA | NA | NA         | NA | (1.72,Inf] |
| 2669 | NA | NA | NA         | NA | (1.72,Inf] |
| 2670 | NA | NA | NA         | NA | NA         |
| 2671 | NA | NA | NA         | NA | NA         |
| 2672 | NA | NA | NA         | NA | (1.72,Inf] |
| 2673 | NA | NA | NA         | NA | (1.72,Inf] |
| 2674 | NA | NA | NA         | NA | NA         |
| 2675 | NA | NA | (0.46,Inf] | NA | NA         |
| 2676 | NA | NA | NA         | NA | (1.72,Inf] |
| 2677 | NA | NA | NA         | NA | (1.72,Inf] |
| 2678 | NA | NA | NA         | NA | NA         |
| 2679 | NA | NA | (0.46,Inf] | NA | (1.72,Inf] |
| 2680 | NA | NA | NA         | NA | (1.72,Inf] |
| 2681 | NA | NA | NA         | NA | (1.72,Inf] |
| 2682 | NA | NA | (0.46,Inf] | NA | (1.72,Inf] |
| 2683 | NA | NA | NA         | NA | (1.72,Inf] |
| 2684 | NA | NA | NA         | NA | (1.72,Inf] |
| 2685 | NA | NA | (0.46,Inf] | NA | NA         |
| 2686 | NA | NA | NA         | NA | (1.72,Inf] |
| 2687 | NA | NA | NA         | NA | (1.72,Inf] |
| 2688 | NA | NA | NA         | NA | (1.72,Inf] |
| 2689 | NA | NA | NA         | NA | NA         |
| 2690 | NA | NA | NA         | NA | (1.72,Inf] |
| 2691 | NA | NA | NA         | NA | NA         |
| 2692 | NA | NA | NA         | NA | NA         |
| 2693 | NA | NA | NA         | NA | (1.72,Inf] |
| 2694 | NA | NA | NA         | NA | (1.72,Inf] |

|      |    |    |            |    |            |
|------|----|----|------------|----|------------|
| 2695 | NA | NA | (0.46,Inf] | NA | (1.72,Inf] |
| 2696 | NA | NA | NA         | NA | NA         |
| 2697 | NA | NA | NA         | NA | (1.72,Inf] |
| 2698 | NA | NA | NA         | NA | (1.72,Inf] |
| 2699 | NA | NA | NA         | NA | NA         |
| 2700 | NA | NA | (0.46,Inf] | NA | (1.72,Inf] |
| 2701 | NA | NA | NA         | NA | NA         |
| 2702 | NA | NA | NA         | NA | (1.72,Inf] |
| 2703 | NA | NA | NA         | NA | (1.72,Inf] |
| 2704 | NA | NA | NA         | NA | (1.72,Inf] |
| 2705 | NA | NA | NA         | NA | (1.72,Inf] |
| 2706 | NA | NA | NA         | NA | (1.72,Inf] |
| 2707 | NA | NA | NA         | NA | (1.72,Inf] |
| 2708 | NA | NA | NA         | NA | NA         |
| 2709 | NA | NA | (0.46,Inf] | NA | NA         |
| 2710 | NA | NA | (0.46,Inf] | NA | NA         |
| 2711 | NA | NA | (0.46,Inf] | NA | NA         |
| 2712 | NA | NA | (0.46,Inf] | NA | NA         |
| 2713 | NA | NA | (0.46,Inf] | NA | NA         |
| 2714 | NA | NA | (0.46,Inf] | NA | NA         |
| 2715 | NA | NA | (0.46,Inf] | NA | NA         |
| 2716 | NA | NA | (0.46,Inf] | NA | NA         |
| 2717 | NA | NA | (0.46,Inf] | NA | NA         |
| 2718 | NA | NA | (0.46,Inf] | NA | NA         |
| 2719 | NA | NA | (0.46,Inf] | NA | NA         |
| 2720 | NA | NA | (0.46,Inf] | NA | NA         |
| 2721 | NA | NA | (0.46,Inf] | NA | NA         |
| 2722 | NA | NA | (0.46,Inf] | NA | NA         |
| 2723 | NA | NA | (0,0.46]   | NA | NA         |
